# Supplementary material
Source: MDPI journal article supplement (https://www.mdpi.com/2304-6740/10/2/19)
Supplement: s1 [file s1]

## Supplementary Material

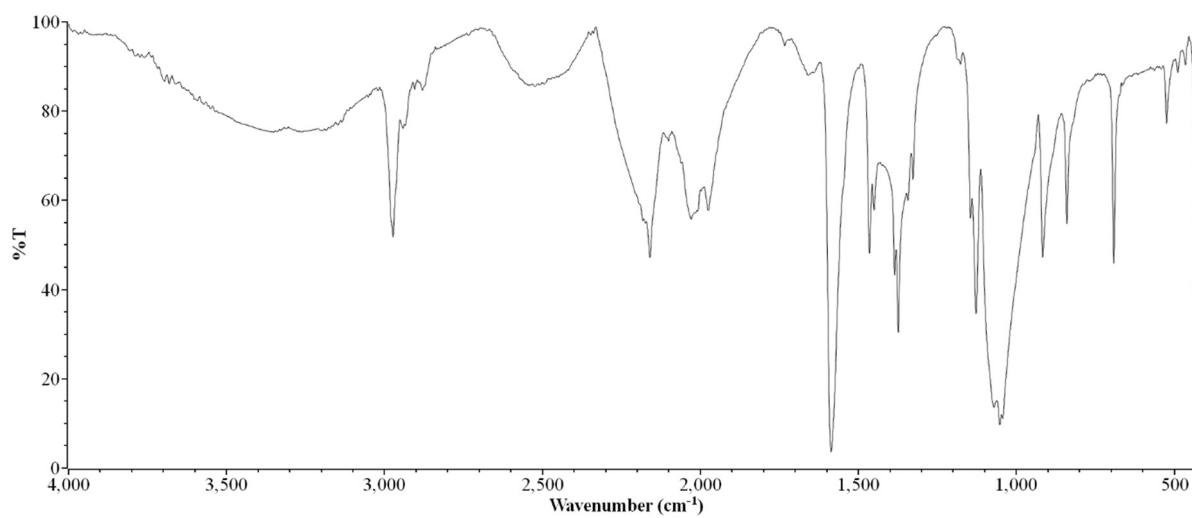

Figure S1. FTIR spectrum of K[S(O)CO<sup>i</sup>Pr].

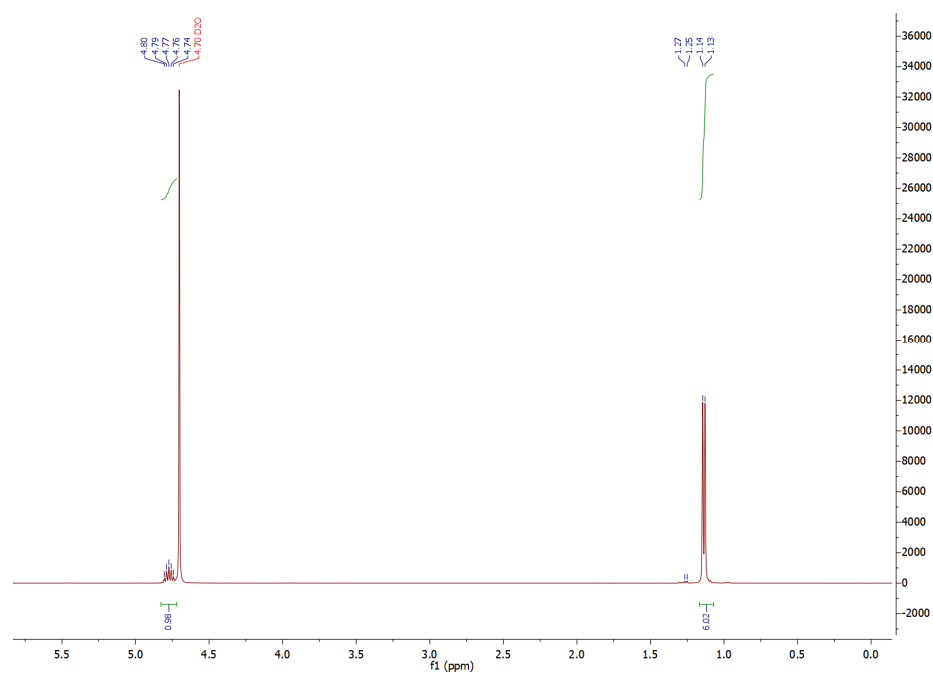

Figure S2. <sup>1</sup>H NMR spectrum of K[S(O)CO<sup>i</sup>Pr].

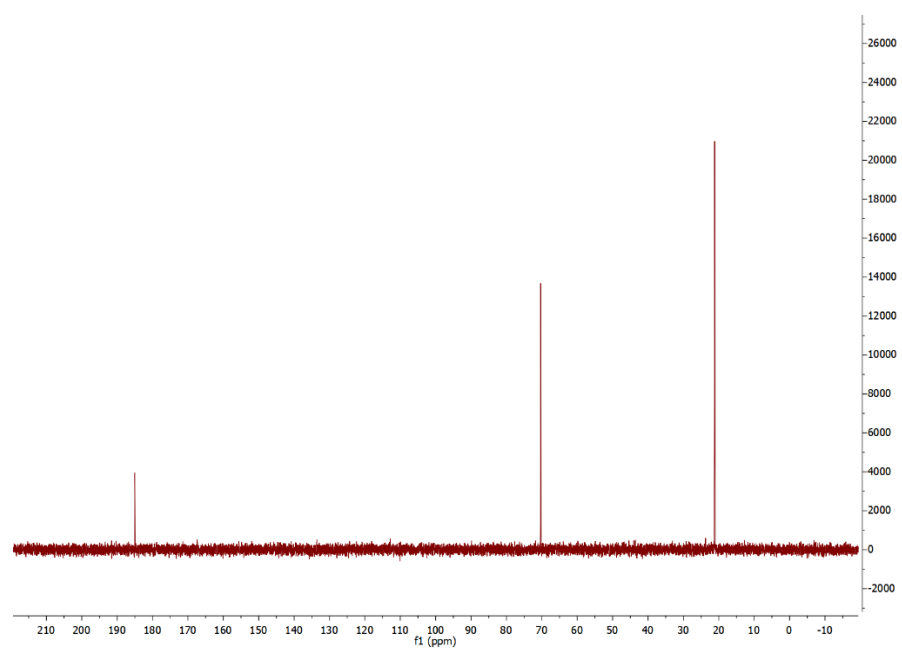

**Figure S3.**  $^{13}\text{C}$  NMR spectrum of  $\text{K}[\text{S}(\text{O})\text{CO}^i\text{Pr}]$ .

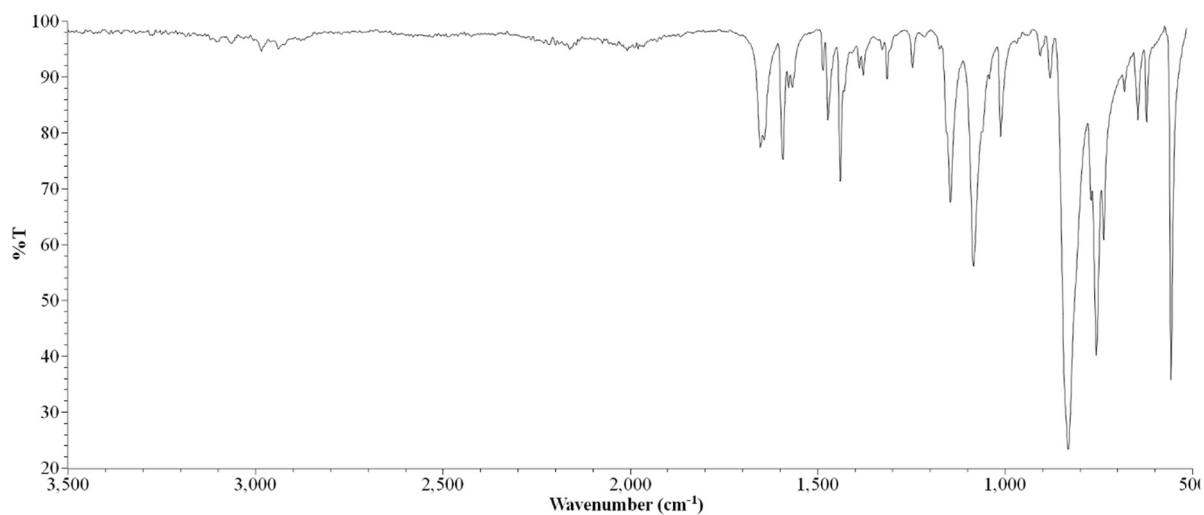

**Figure S4.** FTIR spectrum of  $[\{Ag_4(SC(O)O^iPr)_2(2,2'-bpy)_4\}(PF_6)_2]_n$  **1**.

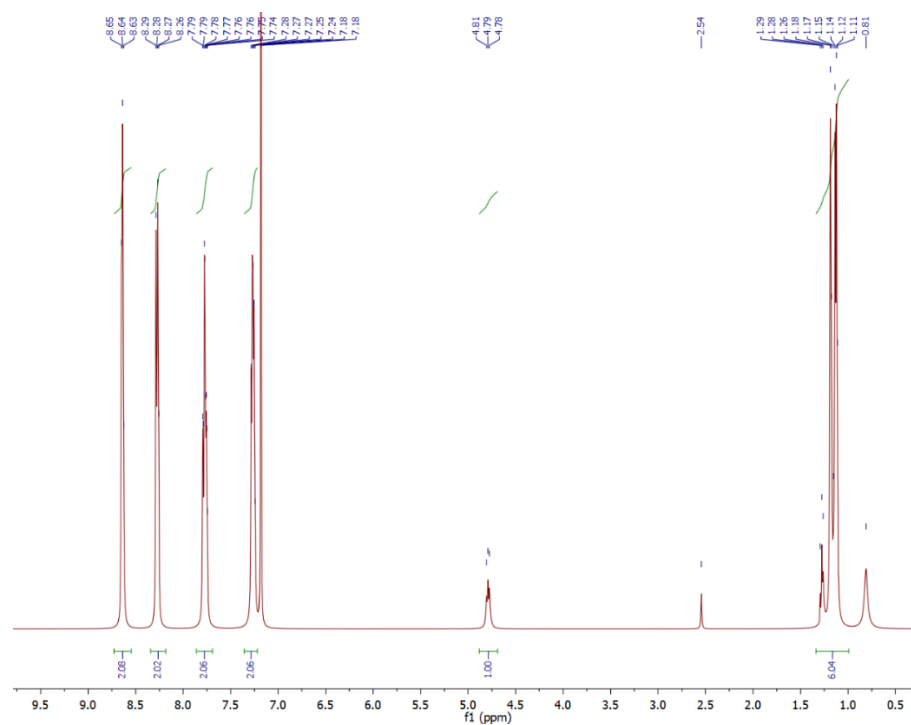

**Figure S5.**  $^1H$  NMR spectrum of  $[\{Ag_4(SC(O)O^iPr)_2(2,2'-bpy)_4\}(PF_6)_2]_n$  **1** in  $CDCl_3$ .

$^{13}C$  NMR spectrum for **1** could not be obtained due to decomposition of product during prolonged exposure to chlorinated solvent.

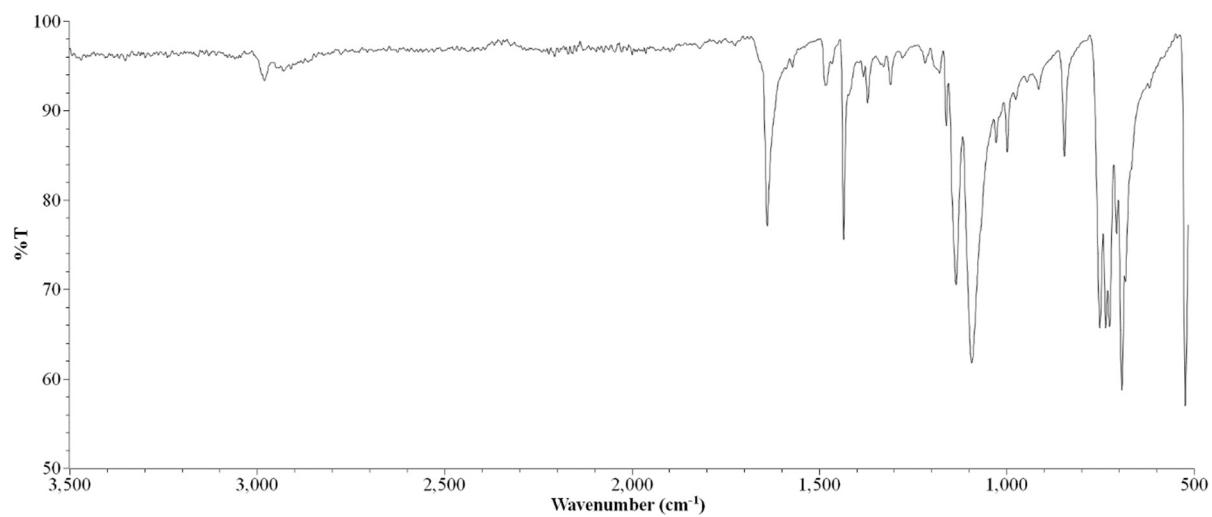

**Figure S6.** FTIR spectrum of  $[\text{Au}_2\{\text{S}(\text{O})\text{CO}^i\text{Pr}\}_2(\text{dppe})]_n \mathbf{2}$ .

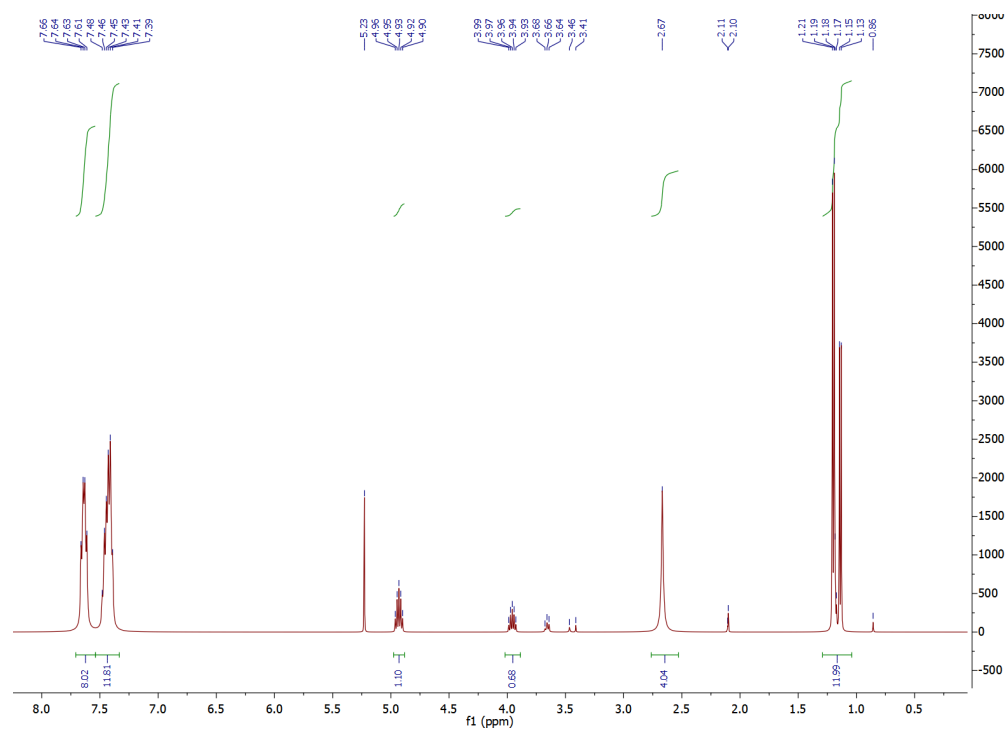

**Figure S7.**  $^1\text{H}$  NMR spectrum of  $[\text{Au}_2\{\text{S}(\text{O})\text{CO}^i\text{Pr}\}_2(\text{dppe})]_n \mathbf{2}$  in  $\text{CDCl}_3$ .

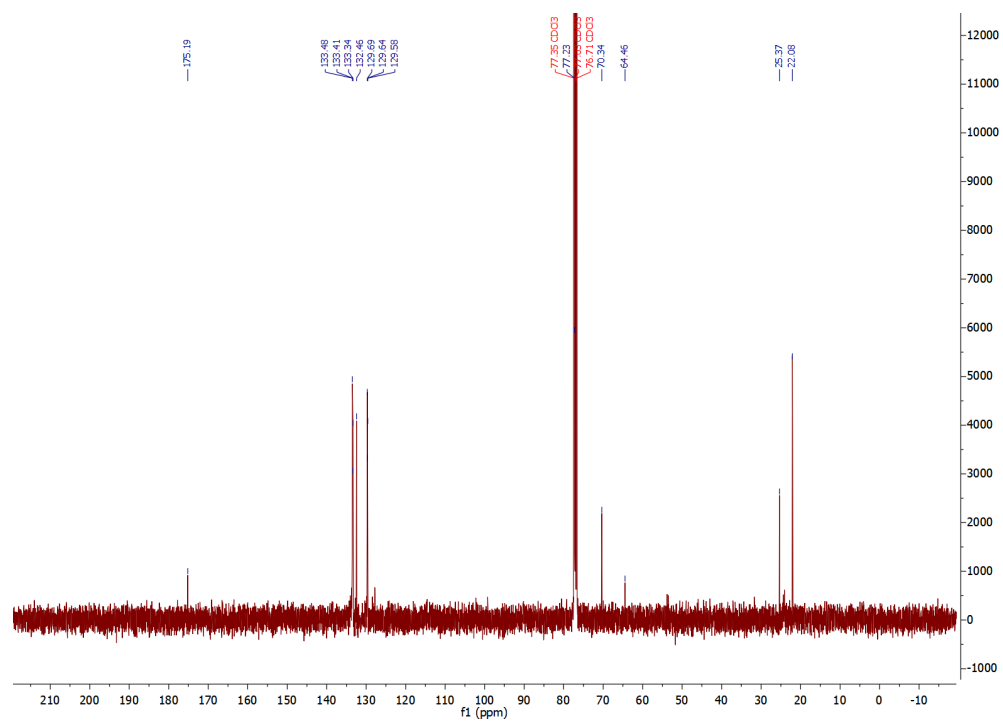

**Figure S8.**  $^{13}\text{C}$  NMR spectrum of  $[\text{Au}_2\{\text{S}(\text{O})\text{CO}^i\text{Pr}\}_2(\text{dppe})]_n$  **2** in  $\text{CDCl}_3$ .

**Table S1. Crystal data and structure refinement for 1.**

|                                    |                                                                                              |
|------------------------------------|----------------------------------------------------------------------------------------------|
| Identification code                | 1                                                                                            |
| Empirical formula                  | $\text{C}_{48}\text{H}_{46}\text{Ag}_4\text{F}_{12}\text{N}_8\text{O}_4\text{P}_2\text{S}_2$ |
| Formula weight                     | 1584.47                                                                                      |
| Temperature/K                      | 150.0                                                                                        |
| Crystal system                     | orthorhombic                                                                                 |
| Space group                        | $\text{Pca}2_1$                                                                              |
| $a/\text{\AA}$                     | 28.2245(7)                                                                                   |
| $b/\text{\AA}$                     | 7.1755(2)                                                                                    |
| $c/\text{\AA}$                     | 27.6678(7)                                                                                   |
| $\alpha/^\circ$                    | 90                                                                                           |
| $\beta/^\circ$                     | 90                                                                                           |
| $\gamma/^\circ$                    | 90                                                                                           |
| Volume/ $\text{\AA}^3$             | 5603.4(3)                                                                                    |
| Z                                  | 4                                                                                            |
| $\rho_{\text{calc}}/\text{g/cm}^3$ | 1.878                                                                                        |
| $\mu/\text{mm}^{-1}$               | 1.600                                                                                        |

F(000) 3120.0

---

---

Radiation MoK $\alpha$  ( $\lambda = 0.71073$ )

---

2 $\Theta$  range for data collection/ $^{\circ}$  1.442 to 56.406

---

Index ranges  $-37 \leq h \leq 36$ ,  $-9 \leq k \leq 7$ ,  $-35 \leq l \leq 36$

---

Reflections collected 73429

---

Independent reflections 13261 [ $R_{\text{int}} = 0.0291$ ,  $R_{\text{sigma}} = 0.0263$ ]

---

Data/restraints/parameters 13261/1/725

---

Goodness-of-fit on  $F^2$  1.052

---

Final R indexes [ $I \geq 2\sigma(I)$ ]  $R_1 = 0.0245$ ,  $wR_2 = 0.0494$

---

Final R indexes [all data]  $R_1 = 0.0300$ ,  $wR_2 = 0.0518$

---

Largest diff. peak/hole / e  $\text{\AA}^{-3}$  1.00/-0.55

---

Flack parameter -0.018(5)

---

**Table S2. Fractional Atomic Coordinates ( $\times 10^4$ ) and Equivalent Isotropic Displacement Parameters ( $\text{\AA}^2 \times 10^3$ ) for 1.  $U_{eq}$  is defined as 1/3 of the trace of the orthogonalised  $U_{ij}$  tensor**

| Atom | $x$        | $y$        | $z$        | $U(eq)$  |
|------|------------|------------|------------|----------|
| Ag01 | 3162.5(2)  | 4466.1(5)  | 5764.9(2)  | 29.46(7) |
| Ag02 | 3665.0(2)  | 9362.3(5)  | 6221.7(2)  | 30.66(8) |
| Ag03 | 4281.0(2)  | 180.3(5)   | 5313.4(2)  | 32.60(8) |
| Ag04 | 3909.1(2)  | 5141.9(5)  | 5003.2(2)  | 32.70(8) |
| S005 | 3951.5(3)  | 6587.6(13) | 5788.6(4)  | 25.0(2)  |
| S006 | 3519.8(3)  | 1589.3(14) | 5442.9(4)  | 24.8(2)  |
| P007 | 1633.0(4)  | 5686.3(18) | 3798.6(4)  | 29.4(3)  |
| P008 | 4171.5(4)  | -380.4(17) | 2385.9(4)  | 29.3(2)  |
| F009 | 1924.4(10) | 7147(4)    | 3478.7(10) | 43.8(7)  |
| F00A | 4592.9(10) | -425(4)    | 2001.1(11) | 44.0(7)  |
| F00B | 1214.3(10) | 5692(4)    | 3412.0(11) | 46.7(7)  |
| F00C | 2054.0(9)  | 5682(4)    | 4187.7(10) | 43.1(7)  |
| O00D | 2745.8(10) | 1032(4)    | 4971.6(12) | 34.1(7)  |
| F00E | 3994.6(9)  | 1562(4)    | 2168.6(12) | 50.4(8)  |



| Atom | $x$        | $y$      | $z$        | U(eq)    |
|------|------------|----------|------------|----------|
| F00F | 4349.0(12) | -2321(4) | 2599.9(10) | 55.1(8)  |
| F00G | 1389.4(10) | 7392(5)  | 4079.5(11) | 52.2(8)  |
| F00H | 4503.8(10) | 703(4)   | 2757.4(12) | 51.7(8)  |
| O00I | 4443.7(11) | 5750(4)  | 6544.0(11) | 30.9(7)  |
| F00J | 3838.8(10) | -1445(5) | 2006.9(11) | 57.5(9)  |
| F00K | 3750.4(11) | -333(4)  | 2768.7(12) | 48.2(8)  |
| N00L | 3814.2(12) | 10252(5) | 7005.5(13) | 25.2(8)  |
| F00M | 1884.6(10) | 4020(4)  | 3516.5(11) | 47.9(8)  |
| N00N | 3667.3(12) | 4779(5)  | 4225.9(14) | 26.0(8)  |
| N00O | 2917.6(12) | 5298(5)  | 6544.9(13) | 23.9(7)  |
| O00P | 3287.1(11) | -1235(5) | 4878.3(13) | 42.2(9)  |
| N00Q | 4566.9(12) | -1125(5) | 4596.4(13) | 25.9(7)  |
| N00R | 4534.7(11) | 3855(5)  | 4567.5(13) | 24.4(7)  |
| F00S | 1343.4(11) | 4262(5)  | 4127.0(13) | 61.2(10) |
| O00T | 4530.8(11) | 3733(5)  | 5928.0(12) | 40.6(8)  |
| N00U | 2949.2(12) | 10336(5) | 6579.4(13) | 23.9(7)  |

| Atom | $x$        | $y$      | $z$        | U(eq)    |
|------|------------|----------|------------|----------|
| N00V | 2391.4(11) | 5520(5)  | 5729.5(13) | 24.2(7)  |
| C00W | 5027.3(14) | -1608(5) | 4592.9(15) | 24.8(8)  |
| C00X | 4241.4(16) | 10067(6) | 7214.9(18) | 31.1(10) |
| C00Y | 2607.8(16) | 6622(6)  | 7428.2(15) | 31.0(10) |
| C00Z | 2570.7(14) | 11502(6) | 7289.2(16) | 28.7(9)  |
| C010 | 4455.1(14) | 3547(5)  | 4097.8(16) | 25.1(9)  |
| C011 | 3973.4(14) | 4002(6)  | 3911.4(15) | 25.2(9)  |
| C012 | 3439.3(14) | 10651(5) | 7292.1(15) | 22.8(8)  |
| C013 | 5287.3(13) | -1377(5) | 5057.3(15) | 24.1(8)  |
| N014 | 5066.9(12) | -441(5)  | 5413.3(13) | 26.5(8)  |
| C015 | 4317.5(17) | 10292(7) | 7702.1(19) | 38.9(12) |
| C016 | 2301.1(15) | 6572(6)  | 7039.1(15) | 27.9(9)  |
| C017 | 4976.9(17) | -2443(6) | 3756.8(16) | 35.8(11) |
| C018 | 3163.8(14) | 229(6)   | 5049.1(17) | 26.9(9)  |
| C019 | 4507.6(17) | -1916(6) | 3760.4(16) | 35.0(11) |
| C01A | 5238.3(16) | -2282(6) | 4173.2(16) | 31.1(10) |

| Atom | $x$        | $y$      | $z$        | U(eq)    |
|------|------------|----------|------------|----------|
| C01B | 2144.3(15) | 11625(6) | 7044.4(18) | 34.3(11) |
| C01C | 4813.6(14) | 2878(6)  | 3796.9(17) | 29.2(9)  |
| C01D | 3209.2(16) | 5377(6)  | 6928.8(16) | 28.6(9)  |
| C01E | 2140.8(15) | 5556(6)  | 5318.0(17) | 30.6(9)  |
| C01F | 4966.8(14) | 3536(6)  | 4746.5(16) | 28.8(9)  |
| C01G | 3068.5(17) | 6022(6)  | 7375.2(16) | 32.6(10) |
| C01H | 3491.5(16) | 10857(7) | 7787.1(17) | 35.2(11) |
| C01I | 2127.8(15) | 11120(6) | 6563.3(18) | 34.0(10) |
| C01J | 4314.4(17) | -1277(6) | 4184.7(16) | 32.4(10) |
| C01K | 3844.9(18) | 3718(8)  | 3433.0(19) | 50.8(15) |
| C01L | 2970.2(14) | 10836(5) | 7046.5(16) | 23.9(9)  |
| C01M | 2534.2(15) | 10509(6) | 6344.4(17) | 30.9(10) |
| C01N | 5343.9(15) | 2912(6)  | 4470.2(17) | 32.4(10) |
| C01O | 3094.0(18) | 5049(8)  | 3596.6(19) | 43.2(13) |
| C01P | 5261.8(15) | 2577(6)  | 3984.1(17) | 33.3(10) |
| C01Q | 4357.3(14) | 5122(6)  | 6098.1(16) | 25.4(9)  |

| Atom | <i>x</i>   | <i>y</i> | <i>z</i>   | U(eq)    |
|------|------------|----------|------------|----------|
| C01R | 3237.9(15) | 5283(7)  | 4070.2(17) | 31.0(10) |
| C01S | 2172.7(14) | 5898(5)  | 6149.7(14) | 21.9(8)  |
| C01T | 2566(2)    | 552(8)   | 4122(2)    | 58.2(17) |
| C01U | 4797.6(17) | 4695(6)  | 6827.5(17) | 32.8(10) |
| C01V | 2470.4(15) | 5905(5)  | 6594.1(15) | 23.9(9)  |
| C01W | 1665.8(16) | 5982(7)  | 5304.6(18) | 35.2(10) |
| C01X | 5288.5(18) | 5241(8)  | 6659(2)    | 53.4(16) |
| C01Y | 1689.2(15) | 6295(7)  | 6160.9(17) | 33.6(10) |
| C01Z | 3932.6(18) | 10676(8) | 7994.4(19) | 43.7(12) |
| C020 | 2427.3(16) | 43(7)    | 4629(2)    | 40.6(12) |
| C021 | 5292.2(16) | -149(6)  | 5831.4(16) | 32.5(10) |
| C022 | 5743.3(15) | -2067(7) | 5124.2(17) | 36.7(11) |
| C023 | 5745.5(16) | -786(7)  | 5918.9(17) | 35.8(11) |
| C024 | 1437.9(15) | 6351(7)  | 5733.7(19) | 38.3(11) |
| C025 | 5968.1(16) | -1776(7) | 5559.5(18) | 41.3(12) |
| C026 | 3399(2)    | 4254(10) | 3281(2)    | 61.2(18) |

| Atom | <i>x</i>   | <i>y</i> | <i>z</i> | U(eq)    |
|------|------------|----------|----------|----------|
| C027 | 1933.9(18) | 652(8)   | 4773(3)  | 65(2)    |
| C028 | 4701(3)    | 5167(8)  | 7349(2)  | 61.0(18) |

**Table S3. Anisotropic Displacement Parameters (Å<sup>2</sup>×10<sup>3</sup>) for 1. The Anisotropic displacement factor exponent takes the form:  $-2\pi^2[h^2a^{*2}U_{11}+2hka^*b^*U_{12}+\dots]$ .**

| Atom | U <sub>11</sub> | U <sub>22</sub> | U <sub>33</sub> | U <sub>23</sub> | U <sub>13</sub> | U <sub>12</sub> |
|------|-----------------|-----------------|-----------------|-----------------|-----------------|-----------------|
| Ag01 | 27.70(15)       | 36.94(17)       | 23.73(16)       | -4.31(15)       | 3.40(14)        | 9.57(13)        |
| Ag02 | 28.47(16)       | 36.75(18)       | 26.75(16)       | -8.32(16)       | 2.73(14)        | 4.52(14)        |
| Ag03 | 22.95(15)       | 43.07(19)       | 31.77(18)       | -7.51(17)       | 3.89(14)        | 3.39(14)        |
| Ag04 | 30.71(17)       | 47.9(2)         | 19.52(15)       | -2.59(16)       | 2.86(14)        | 7.82(15)        |
| S005 | 29.7(5)         | 19.9(5)         | 25.4(5)         | -3.6(4)         | -3.2(4)         | 3.3(4)          |
| S006 | 25.1(5)         | 21.1(5)         | 28.3(5)         | -2.7(4)         | -1.0(4)         | 4.1(4)          |
| P007 | 22.3(5)         | 43.4(7)         | 22.6(6)         | -3.6(5)         | -1.0(4)         | -2.7(5)         |
| P008 | 26.3(5)         | 36.6(6)         | 25.1(6)         | -4.3(5)         | -3.2(5)         | 1.4(5)          |
| F009 | 47.8(16)        | 49.2(17)        | 34.2(15)        | 1.6(14)         | 5.1(13)         | -10.0(14)       |
| F00A | 29.8(14)        | 65(2)           | 37.1(16)        | -3.5(14)        | 5.2(12)         | 5.6(13)         |
| F00B | 30.1(14)        | 70(2)           | 40.2(17)        | -11.8(15)       | -12.4(13)       | 3.9(14)         |

| Atom | U <sub>11</sub> | U <sub>22</sub> | U <sub>33</sub> | U <sub>23</sub> | U <sub>13</sub> | U <sub>12</sub> |
|------|-----------------|-----------------|-----------------|-----------------|-----------------|-----------------|
| F00C | 30.3(14)        | 72(2)           | 26.7(14)        | -1.6(14)        | -8.0(12)        | -4.4(13)        |
| O00D | 25.9(15)        | 26.5(15)        | 50(2)           | -8.9(15)        | -9.5(15)        | 4.9(12)         |
| F00E | 31.6(14)        | 53.9(19)        | 66(2)           | 18.7(17)        | 5.9(14)         | 10.5(13)        |
| F00F | 87(2)           | 42.4(17)        | 36.4(16)        | 1.8(14)         | 4.8(15)         | 23.7(16)        |
| F00G | 37.8(15)        | 69(2)           | 49.3(18)        | -25.5(17)       | 3.2(13)         | 6.0(15)         |
| F00H | 40.2(16)        | 63(2)           | 51.5(19)        | -29.0(16)       | -11.8(14)       | 6.9(15)         |
| O00I | 38.1(17)        | 26.4(15)        | 28.1(16)        | -5.0(13)        | -8.8(14)        | 11.4(13)        |
| F00J | 44.5(17)        | 82(2)           | 45.7(18)        | -17.7(17)       | -6.8(14)        | -19.3(17)       |
| F00K | 45.8(17)        | 56.3(19)        | 42.6(18)        | -0.5(15)        | 16.5(14)        | 0.5(14)         |
| N00L | 24.8(18)        | 24.7(18)        | 26.0(19)        | -5.5(15)        | 1.9(15)         | -0.6(14)        |
| F00M | 44.3(16)        | 45.6(17)        | 53.9(19)        | -17.5(15)       | -10.4(14)       | 8.7(14)         |
| N00N | 22.2(18)        | 29.6(19)        | 26.1(19)        | -2.1(15)        | 1.2(15)         | -0.5(14)        |
| N00O | 26.7(17)        | 25.0(17)        | 20.1(17)        | -0.3(14)        | 1.1(14)         | 1.0(14)         |
| O00P | 37.7(18)        | 34.4(18)        | 55(2)           | -20.9(16)       | -13.9(15)       | 11.8(14)        |
| N00Q | 30.7(19)        | 22.1(17)        | 24.9(19)        | 0.6(15)         | 0.9(15)         | -1.7(14)        |
| N00R | 24.2(17)        | 20.8(17)        | 28.2(19)        | -1.3(15)        | 4.1(15)         | -1.0(14)        |

| Atom | U <sub>11</sub> | U <sub>22</sub> | U <sub>33</sub> | U <sub>23</sub> | U <sub>13</sub> | U <sub>12</sub> |
|------|-----------------|-----------------|-----------------|-----------------|-----------------|-----------------|
| F00S | 49.5(19)        | 81(2)           | 54(2)           | 20.5(18)        | -0.1(15)        | -27.9(17)       |
| O00T | 48(2)           | 37.5(18)        | 35.8(18)        | -12.1(15)       | -8.0(15)        | 17.1(16)        |
| N00U | 23.9(17)        | 22.8(17)        | 25.1(18)        | 0.5(14)         | 1.2(14)         | 1.3(14)         |
| N00V | 27.9(17)        | 26.3(16)        | 18.5(16)        | 0.0(15)         | 3.3(15)         | 4.4(13)         |
| C00W | 31(2)           | 18.1(19)        | 25(2)           | 2.0(17)         | 6.2(18)         | -4.8(16)        |
| C00X | 21(2)           | 35(2)           | 36(3)           | -4(2)           | 0.3(19)         | 4.6(18)         |
| C00Y | 51(3)           | 27(2)           | 15(2)           | -2.1(17)        | 6.1(19)         | -3(2)           |
| C00Z | 23(2)           | 27(2)           | 36(3)           | -3.7(19)        | 7.5(18)         | -0.3(17)        |
| C010 | 27(2)           | 16.0(19)        | 33(2)           | -3.0(17)        | 4.0(18)         | -0.9(16)        |
| C011 | 25(2)           | 21(2)           | 29(2)           | -4.2(17)        | 4.6(17)         | -3.0(16)        |
| C012 | 26(2)           | 14.5(17)        | 28(2)           | -1.0(16)        | 0.5(17)         | -1.1(15)        |
| C013 | 26.1(19)        | 23.1(19)        | 23(2)           | 2.4(17)         | 6.8(17)         | -1.2(16)        |
| N014 | 26.3(18)        | 30.3(19)        | 22.7(19)        | -2.1(15)        | 4.6(15)         | 0.6(14)         |
| C015 | 32(2)           | 45(3)           | 39(3)           | -8(2)           | -11(2)          | 3(2)            |
| C016 | 33(2)           | 26(2)           | 24(2)           | -1.9(18)        | 6.9(18)         | -2.3(17)        |
| C017 | 57(3)           | 25(2)           | 25(2)           | -1.8(19)        | 11(2)           | -9(2)           |

| Atom | U <sub>11</sub> | U <sub>22</sub> | U <sub>33</sub> | U <sub>23</sub> | U <sub>13</sub> | U <sub>12</sub> |
|------|-----------------|-----------------|-----------------|-----------------|-----------------|-----------------|
| C018 | 28(2)           | 26(2)           | 27(2)           | 0.2(18)         | -0.9(19)        | 0.5(16)         |
| C019 | 56(3)           | 28(2)           | 21(2)           | 0.9(19)         | -1(2)           | -14(2)          |
| C01A | 40(3)           | 23(2)           | 31(2)           | -1.4(19)        | 9(2)            | -2.7(18)        |
| C01B | 21(2)           | 30(2)           | 51(3)           | -2(2)           | 6(2)            | 0.0(18)         |
| C01C | 31(2)           | 23(2)           | 33(2)           | -7.1(18)        | 5.9(19)         | -2.7(17)        |
| C01D | 33(2)           | 26(2)           | 27(2)           | 0.3(18)         | -1.0(18)        | -1.5(18)        |
| C01E | 34(2)           | 36(2)           | 22(2)           | 1(2)            | 1.6(19)         | 4.9(18)         |
| C01F | 28(2)           | 24(2)           | 35(2)           | 5.1(19)         | 0.4(18)         | -1.0(17)        |
| C01G | 44(3)           | 31(2)           | 23(2)           | 2.4(19)         | -6(2)           | -7(2)           |
| C01H | 31(2)           | 44(3)           | 31(2)           | -7(2)           | 2(2)            | 5(2)            |
| C01I | 23(2)           | 30(2)           | 50(3)           | 5(2)            | -6(2)           | 1.1(18)         |
| C01J | 41(3)           | 25(2)           | 31(2)           | 3.9(19)         | -4(2)           | -5.7(19)        |
| C01K | 39(3)           | 77(4)           | 36(3)           | -32(3)          | -2(2)           | 13(3)           |
| C01L | 24(2)           | 18.3(19)        | 29(2)           | 1.1(17)         | 2.2(17)         | 0.7(15)         |
| C01M | 29(2)           | 27(2)           | 37(3)           | 3.1(19)         | -2.0(19)        | -3.9(18)        |
| C01N | 24(2)           | 24(2)           | 49(3)           | 2(2)            | 0(2)            | 0.3(17)         |



| Atom | U <sub>11</sub> | U <sub>22</sub> | U <sub>33</sub> | U <sub>23</sub> | U <sub>13</sub> | U <sub>12</sub> |
|------|-----------------|-----------------|-----------------|-----------------|-----------------|-----------------|
| C01O | 27(2)           | 66(4)           | 37(3)           | -10(3)          | -6(2)           | 5(2)            |
| C01P | 26(2)           | 26(2)           | 48(3)           | -5(2)           | 15(2)           | -0.2(18)        |
| C01Q | 25(2)           | 23(2)           | 29(2)           | -0.8(17)        | -0.8(17)        | -1.1(16)        |
| C01R | 23(2)           | 41(3)           | 29(2)           | -1(2)           | 4.5(18)         | 0.3(18)         |
| C01S | 28(2)           | 16.5(18)        | 21(2)           | -0.4(15)        | 2.5(16)         | 2.5(15)         |
| C01T | 78(4)           | 48(3)           | 48(3)           | 2(3)            | -31(3)          | -15(3)          |
| C01U | 41(3)           | 25(2)           | 32(2)           | 4.7(19)         | -12(2)          | 4.8(19)         |
| C01V | 32(2)           | 18.9(19)        | 21(2)           | -0.9(16)        | 3.8(17)         | -2.8(16)        |
| C01W | 35(2)           | 40(2)           | 31(2)           | -1(2)           | -7(2)           | 3.1(19)         |
| C01X | 37(3)           | 54(3)           | 69(4)           | 24(3)           | -20(3)          | -7(2)           |
| C01Y | 29(2)           | 41(3)           | 31(3)           | -10(2)          | 6.0(19)         | 2.5(19)         |
| C01Z | 46(3)           | 56(3)           | 29(3)           | -7(2)           | -8(2)           | 5(2)            |
| C020 | 31(2)           | 28(2)           | 63(4)           | -10(2)          | -21(2)          | -1.3(19)        |
| C021 | 31(2)           | 41(3)           | 25(2)           | -2(2)           | 4.0(18)         | 0.8(18)         |
| C022 | 29(2)           | 40(3)           | 41(3)           | -7(2)           | 8(2)            | 7.4(19)         |
| C023 | 36(2)           | 44(3)           | 27(2)           | 0(2)            | -3.7(19)        | 1(2)            |

| Atom | U <sub>11</sub> | U <sub>22</sub> | U <sub>33</sub> | U <sub>23</sub> | U <sub>13</sub> | U <sub>12</sub> |
|------|-----------------|-----------------|-----------------|-----------------|-----------------|-----------------|
| C024 | 26(2)           | 48(3)           | 42(3)           | -8(3)           | -4(2)           | 6.6(19)         |
| C025 | 31(2)           | 47(3)           | 46(3)           | -1(2)           | -6(2)           | 10(2)           |
| C026 | 47(3)           | 100(5)          | 36(3)           | -27(3)          | -13(3)          | 9(3)            |
| C027 | 33(3)           | 47(3)           | 115(6)          | -22(4)          | -23(3)          | 5(2)            |
| C028 | 96(5)           | 54(4)           | 33(3)           | 1(3)            | -18(3)          | 27(3)           |

**Table S4. Bond Lengths for 1.**

| Atom | Atom              | Length/Å   | Atom | Atom | Length/Å |
|------|-------------------|------------|------|------|----------|
| Ag01 | Ag04              | 3.0194(5)  | N00U | C01L | 1.343(5) |
| Ag01 | S005              | 2.6982(10) | N00U | C01M | 1.345(5) |
| Ag01 | S006              | 2.4642(10) | N00V | C01E | 1.341(6) |
| Ag01 | N00O              | 2.343(4)   | N00V | C01S | 1.344(5) |
| Ag01 | N00V              | 2.306(3)   | C00W | C013 | 1.489(6) |
| Ag02 | Ag03 <sup>1</sup> | 3.1118(5)  | C00W | C01A | 1.392(6) |
| Ag02 | S005              | 2.4604(10) | C00X | C015 | 1.374(7) |
| Ag02 | S006 <sup>1</sup> | 2.7139(11) | C00Y | C016 | 1.382(6) |

| Atom | Atom | Length/Å   | Atom | Atom | Length/Å |
|------|------|------------|------|------|----------|
| Ag02 | N00L | 2.300(4)   | C00Y | C01G | 1.377(6) |
| Ag02 | N00U | 2.356(3)   | C00Z | C01B | 1.384(6) |
| Ag03 | S006 | 2.4012(10) | C00Z | C01L | 1.397(6) |
| Ag03 | N00Q | 2.337(4)   | C010 | C011 | 1.490(6) |
| Ag03 | N014 | 2.279(3)   | C010 | C01C | 1.396(6) |
| Ag04 | S005 | 2.4108(11) | C011 | C01K | 1.387(6) |
| Ag04 | N00N | 2.271(4)   | C012 | C01H | 1.385(6) |
| Ag04 | N00R | 2.329(3)   | C012 | C01L | 1.494(6) |
| S005 | C01Q | 1.775(4)   | C013 | N014 | 1.345(5) |
| S006 | C018 | 1.775(4)   | C013 | C022 | 1.392(5) |
| P007 | F009 | 1.600(3)   | N014 | C021 | 1.336(6) |
| P007 | F00B | 1.594(3)   | C015 | C01Z | 1.382(7) |
| P007 | F00C | 1.603(3)   | C016 | C01V | 1.405(6) |
| P007 | F00G | 1.605(3)   | C017 | C019 | 1.378(7) |
| P007 | F00M | 1.595(3)   | C017 | C01A | 1.373(6) |
| P007 | F00S | 1.593(3)   | C019 | C01J | 1.373(6) |

| Atom | Atom | Length/Å | Atom | Atom | Length/Å |
|------|------|----------|------|------|----------|
| P008 | F00A | 1.597(3) | C01B | C01I | 1.380(7) |
| P008 | F00E | 1.598(3) | C01C | C01P | 1.384(6) |
| P008 | F00F | 1.594(3) | C01D | C01G | 1.378(6) |
| P008 | F00H | 1.594(3) | C01E | C01W | 1.375(6) |
| P008 | F00J | 1.601(3) | C01F | C01N | 1.385(6) |
| P008 | F00K | 1.592(3) | C01H | C01Z | 1.377(7) |
| O00D | C018 | 1.330(5) | C01I | C01M | 1.369(6) |
| O00D | C020 | 1.487(5) | C01K | C026 | 1.382(7) |
| O00I | C01Q | 1.336(5) | C01N | C01P | 1.386(6) |
| O00I | C01U | 1.479(5) | C01O | C01R | 1.382(7) |
| N00L | C00X | 1.344(6) | C01O | C026 | 1.352(7) |
| N00L | C012 | 1.353(5) | C01S | C01V | 1.489(6) |
| N00N | C011 | 1.347(5) | C01S | C01Y | 1.395(6) |
| N00N | C01R | 1.336(6) | C01T | C020 | 1.501(8) |
| N00O | C01D | 1.345(5) | C01U | C01X | 1.513(7) |
| N00O | C01V | 1.342(5) | C01U | C028 | 1.506(7) |

| Atom | Atom | Length/Å | Atom | Atom | Length/Å |
|------|------|----------|------|------|----------|
| O00P | C018 | 1.203(5) | C01W | C024 | 1.376(7) |
| N00Q | C00W | 1.345(5) | C01Y | C024 | 1.379(6) |
| N00Q | C01J | 1.348(5) | C020 | C027 | 1.514(7) |
| N00R | C010 | 1.337(5) | C021 | C023 | 1.380(6) |
| N00R | C01F | 1.336(5) | C022 | C025 | 1.377(6) |
| O00T | C01Q | 1.206(5) | C023 | C025 | 1.374(6) |

<sup>1</sup>+X,<sup>1</sup>+Y,<sup>+</sup>Z

**Table S5. Bond Angles for 1.**

| Atom | Atom | Atom | Angle/°   | Atom | Atom | Atom | Angle/°  |
|------|------|------|-----------|------|------|------|----------|
| S005 | Ag01 | Ag04 | 49.49(2)  | C01V | N00O | C01D | 118.8(4) |
| S006 | Ag01 | Ag04 | 66.20(3)  | C00W | N00Q | Ag03 | 116.3(3) |
| S006 | Ag01 | S005 | 98.26(3)  | C00W | N00Q | C01J | 118.9(4) |
| N00O | Ag01 | Ag04 | 143.87(9) | C01J | N00Q | Ag03 | 124.5(3) |
| N00O | Ag01 | S005 | 94.44(9)  | C010 | N00R | Ag04 | 116.2(3) |
| N00O | Ag01 | S006 | 131.84(9) | C01F | N00R | Ag04 | 124.6(3) |
| N00V | Ag01 | Ag04 | 125.19(9) | C01F | N00R | C010 | 119.0(4) |

| Atom              | Atom | Atom              | Angle/°   | Atom | Atom | Atom | Angle/°  |
|-------------------|------|-------------------|-----------|------|------|------|----------|
| N00V              | Ag01 | S005              | 126.51(9) | C01L | N00U | Ag02 | 116.5(3) |
| N00V              | Ag01 | S006              | 130.21(9) | C01L | N00U | C01M | 118.6(4) |
| N00V              | Ag01 | N00O              | 71.17(12) | C01M | N00U | Ag02 | 124.8(3) |
| S005              | Ag02 | Ag03 <sup>1</sup> | 64.89(3)  | C01E | N00V | Ag01 | 122.7(3) |
| S005              | Ag02 | S006 <sup>1</sup> | 98.01(3)  | C01E | N00V | C01S | 119.2(3) |
| S006 <sup>1</sup> | Ag02 | Ag03 <sup>1</sup> | 48.09(2)  | C01S | N00V | Ag01 | 117.6(3) |
| N00L              | Ag02 | Ag03 <sup>1</sup> | 127.37(9) | N00Q | C00W | C013 | 116.2(4) |
| N00L              | Ag02 | S005              | 128.59(9) | N00Q | C00W | C01A | 120.6(4) |
| N00L              | Ag02 | S006 <sup>1</sup> | 127.81(9) | C01A | C00W | C013 | 123.2(4) |
| N00L              | Ag02 | N00U              | 71.25(12) | N00L | C00X | C015 | 123.4(4) |
| N00U              | Ag02 | Ag03 <sup>1</sup> | 139.69(8) | C01G | C00Y | C016 | 120.0(4) |
| N00U              | Ag02 | S005              | 136.59(9) | C01B | C00Z | C01L | 119.3(4) |
| N00U              | Ag02 | S006 <sup>1</sup> | 91.69(9)  | N00R | C010 | C011 | 117.0(4) |
| S006              | Ag03 | Ag02 <sup>2</sup> | 57.25(3)  | N00R | C010 | C01C | 121.0(4) |
| N00Q              | Ag03 | Ag02 <sup>2</sup> | 143.39(9) | C01C | C010 | C011 | 122.0(4) |
| N00Q              | Ag03 | S006              | 127.17(9) | N00N | C011 | C010 | 116.9(4) |

| Atom | Atom | Atom              | Angle/°    | Atom | Atom | Atom | Angle/°  |
|------|------|-------------------|------------|------|------|------|----------|
| N014 | Ag03 | Ag02 <sup>2</sup> | 114.13(9)  | N00N | C011 | C01K | 120.6(4) |
| N014 | Ag03 | S006              | 159.20(9)  | C01K | C011 | C010 | 122.5(4) |
| N014 | Ag03 | N00Q              | 71.86(12)  | N00L | C012 | C01H | 121.3(4) |
| S005 | Ag04 | Ag01              | 58.31(3)   | N00L | C012 | C01L | 116.4(4) |
| N00N | Ag04 | Ag01              | 115.64(9)  | C01H | C012 | C01L | 122.3(4) |
| N00N | Ag04 | S005              | 156.59(9)  | N014 | C013 | C00W | 117.4(3) |
| N00N | Ag04 | N00R              | 72.07(12)  | N014 | C013 | C022 | 120.5(4) |
| N00R | Ag04 | Ag01              | 145.76(9)  | C022 | C013 | C00W | 122.1(4) |
| N00R | Ag04 | S005              | 126.84(9)  | C013 | N014 | Ag03 | 117.3(3) |
| Ag02 | S005 | Ag01              | 101.37(4)  | C021 | N014 | Ag03 | 122.5(3) |
| Ag04 | S005 | Ag01              | 72.21(3)   | C021 | N014 | C013 | 119.5(4) |
| Ag04 | S005 | Ag02              | 140.43(5)  | C00X | C015 | C01Z | 118.3(4) |
| C01Q | S005 | Ag01              | 102.12(14) | C00Y | C016 | C01V | 118.6(4) |
| C01Q | S005 | Ag02              | 117.17(15) | C01A | C017 | C019 | 119.2(4) |
| C01Q | S005 | Ag04              | 102.23(14) | O00D | C018 | S006 | 111.3(3) |
| Ag01 | S006 | Ag02 <sup>2</sup> | 105.54(4)  | O00P | C018 | S006 | 123.9(3) |

| Atom | Atom | Atom              | Angle/°    | Atom | Atom | Atom | Angle/°  |
|------|------|-------------------|------------|------|------|------|----------|
| Ag03 | S006 | Ag01              | 140.61(5)  | O00P | C018 | O00D | 124.8(4) |
| Ag03 | S006 | Ag02 <sup>2</sup> | 74.66(3)   | C01J | C019 | C017 | 118.7(4) |
| C018 | S006 | Ag01              | 116.80(14) | C017 | C01A | C00W | 120.0(4) |
| C018 | S006 | Ag02 <sup>2</sup> | 104.42(15) | C01I | C01B | C00Z | 119.0(4) |
| C018 | S006 | Ag03              | 100.57(14) | C01P | C01C | C010 | 119.6(4) |
| F009 | P007 | F00C              | 89.53(15)  | N00O | C01D | C01G | 123.1(4) |
| F009 | P007 | F00G              | 89.34(17)  | N00V | C01E | C01W | 122.8(4) |
| F00B | P007 | F009              | 90.48(17)  | N00R | C01F | C01N | 123.5(4) |
| F00B | P007 | F00C              | 179.9(2)   | C01D | C01G | C00Y | 118.2(4) |
| F00B | P007 | F00G              | 90.30(16)  | C01Z | C01H | C012 | 119.8(4) |
| F00B | P007 | F00M              | 90.21(16)  | C01M | C01I | C01B | 118.8(4) |
| F00C | P007 | F00G              | 89.64(16)  | N00Q | C01J | C019 | 122.7(4) |
| F00M | P007 | F009              | 89.53(17)  | C026 | C01K | C011 | 119.2(5) |
| F00M | P007 | F00C              | 89.85(16)  | N00U | C01L | C00Z | 121.2(4) |
| F00M | P007 | F00G              | 178.77(19) | N00U | C01L | C012 | 117.0(4) |
| F00S | P007 | F009              | 178.73(19) | C00Z | C01L | C012 | 121.8(4) |



| Atom | Atom | Atom | Angle/°   | Atom | Atom | Atom | Angle/°  |
|------|------|------|-----------|------|------|------|----------|
| F00S | P007 | F00B | 90.23(17) | N00U | C01M | C01I | 123.0(4) |
| F00S | P007 | F00C | 89.77(17) | C01F | C01N | C01P | 117.6(4) |
| F00S | P007 | F00G | 89.60(19) | C026 | C01O | C01R | 118.4(5) |
| F00S | P007 | F00M | 91.5(2)   | C01C | C01P | C01N | 119.3(4) |
| F00A | P008 | F00E | 89.96(16) | O00I | C01Q | S005 | 111.3(3) |
| F00A | P008 | F00J | 89.47(16) | O00T | C01Q | S005 | 124.3(3) |
| F00E | P008 | F00J | 89.24(19) | O00T | C01Q | O00I | 124.4(4) |
| F00F | P008 | F00A | 89.77(17) | N00N | C01R | C01O | 122.7(4) |
| F00F | P008 | F00E | 179.7(2)  | N00V | C01S | C01V | 117.1(4) |
| F00F | P008 | F00H | 90.07(17) | N00V | C01S | C01Y | 120.7(4) |
| F00F | P008 | F00J | 90.62(19) | C01Y | C01S | C01V | 122.2(4) |
| F00H | P008 | F00A | 90.07(16) | O00I | C01U | C01X | 108.8(4) |
| F00H | P008 | F00E | 90.06(18) | O00I | C01U | C028 | 105.7(4) |
| F00H | P008 | F00J | 179.2(2)  | C028 | C01U | C01X | 113.7(5) |
| F00K | P008 | F00A | 179.8(2)  | N00O | C01V | C016 | 121.3(4) |
| F00K | P008 | F00E | 89.90(16) | N00O | C01V | C01S | 116.5(4) |

| Atom | Atom | Atom | Angle/°   | Atom | Atom | Atom | Angle/°  |
|------|------|------|-----------|------|------|------|----------|
| F00K | P008 | F00F | 90.37(17) | C016 | C01V | C01S | 122.2(4) |
| F00K | P008 | F00H | 89.99(17) | C01E | C01W | C024 | 118.4(4) |
| F00K | P008 | F00J | 90.47(17) | C024 | C01Y | C01S | 119.4(4) |
| C018 | O00D | C020 | 115.6(3)  | C01H | C01Z | C015 | 119.1(5) |
| C01Q | O00I | C01U | 116.1(3)  | O00D | C020 | C01T | 108.8(4) |
| C00X | N00L | Ag02 | 122.9(3)  | O00D | C020 | C027 | 104.4(4) |
| C00X | N00L | C012 | 118.0(4)  | C01T | C020 | C027 | 114.6(5) |
| C012 | N00L | Ag02 | 117.9(3)  | N014 | C021 | C023 | 122.8(4) |
| C011 | N00N | Ag04 | 117.8(3)  | C025 | C022 | C013 | 119.2(4) |
| C01R | N00N | Ag04 | 123.2(3)  | C025 | C023 | C021 | 117.9(4) |
| C01R | N00N | C011 | 119.0(4)  | C01W | C024 | C01Y | 119.6(4) |
| C01D | N00O | Ag01 | 123.9(3)  | C023 | C025 | C022 | 120.0(4) |
| C01V | N00O | Ag01 | 117.0(3)  | C01O | C026 | C01K | 120.1(5) |

<sup>1</sup>+X,<sub>1</sub>+Y,<sub>+</sub>Z; <sup>2</sup>+X,<sub>-</sub>1+Y,<sub>+</sub>Z

**Table S6. Torsion Angles for 1.**

| A                 | B    | C    | D    | Angle/°   | A    | B    | C    | D    | Angle/°   |
|-------------------|------|------|------|-----------|------|------|------|------|-----------|
| Ag01              | S005 | C01Q | O00I | -108.4(3) | C010 | C011 | C01K | C026 | -177.0(5) |
| Ag01              | S005 | C01Q | O00T | 71.3(4)   | C010 | C01C | C01P | C01N | 1.2(6)    |
| Ag01              | S006 | C018 | O00D | 2.1(4)    | C011 | N00N | C01R | C01O | -0.3(7)   |
| Ag01              | S006 | C018 | O00P | -177.5(4) | C011 | C010 | C01C | C01P | 176.4(4)  |
| Ag01              | N00O | C01D | C01G | 174.2(3)  | C011 | C01K | C026 | C01O | 0.2(10)   |
| Ag01              | N00O | C01V | C016 | -175.0(3) | C012 | N00L | C00X | C015 | -1.1(7)   |
| Ag01              | N00O | C01V | C01S | 2.8(4)    | C012 | C01H | C01Z | C015 | 0.1(8)    |
| Ag01              | N00V | C01E | C01W | 172.4(3)  | C013 | C00W | C01A | C017 | -179.5(4) |
| Ag01              | N00V | C01S | C01V | 9.9(4)    | C013 | N014 | C021 | C023 | -0.6(7)   |
| Ag01              | N00V | C01S | C01Y | -171.3(3) | C013 | C022 | C025 | C023 | -1.1(7)   |
| Ag02              | S005 | C01Q | O00I | 1.3(3)    | N014 | C013 | C022 | C025 | -0.2(7)   |
| Ag02              | S005 | C01Q | O00T | -179.0(3) | N014 | C021 | C023 | C025 | -0.7(7)   |
| Ag02 <sup>1</sup> | S006 | C018 | O00D | 118.2(3)  | C016 | C00Y | C01G | C01D | -0.2(7)   |
| Ag02 <sup>1</sup> | S006 | C018 | O00P | -61.4(4)  | C017 | C019 | C01J | N00Q | 0.8(7)    |
| Ag02              | N00L | C00X | C015 | -168.6(4) | C018 | O00D | C020 | C01T | -82.3(5)  |

| A    | B    | C    | D    | Angle/°   | A    | B    | C    | D    | Angle/°   |
|------|------|------|------|-----------|------|------|------|------|-----------|
| Ag02 | N00L | C012 | C01H | 167.9(3)  | C018 | O00D | C020 | C027 | 154.9(4)  |
| Ag02 | N00L | C012 | C01L | -11.5(4)  | C019 | C017 | C01A | C00W | 0.6(6)    |
| Ag02 | N00U | C01L | C00Z | 177.6(3)  | C01A | C00W | C013 | N014 | 169.6(4)  |
| Ag02 | N00U | C01L | C012 | -2.3(5)   | C01A | C00W | C013 | C022 | -9.4(6)   |
| Ag02 | N00U | C01M | C01I | -178.5(3) | C01A | C017 | C019 | C01J | -1.2(6)   |
| Ag03 | S006 | C018 | O00D | -165.1(3) | C01B | C00Z | C01L | N00U | 0.9(6)    |
| Ag03 | S006 | C018 | O00P | 15.3(5)   | C01B | C00Z | C01L | C012 | -179.3(4) |
| Ag03 | N00Q | C00W | C013 | 4.3(4)    | C01B | C01I | C01M | N00U | 1.5(7)    |
| Ag03 | N00Q | C00W | C01A | -175.7(3) | C01C | C010 | C011 | N00N | -174.8(4) |
| Ag03 | N00Q | C01J | C019 | 174.6(3)  | C01C | C010 | C011 | C01K | 2.7(7)    |
| Ag03 | N014 | C021 | C023 | 169.6(3)  | C01D | N00O | C01V | C016 | -1.6(6)   |
| Ag04 | S005 | C01Q | O00I | 177.5(3)  | C01D | N00O | C01V | C01S | 176.2(4)  |
| Ag04 | S005 | C01Q | O00T | -2.8(4)   | C01E | N00V | C01S | C01V | -177.9(4) |
| Ag04 | N00N | C011 | C010 | -3.3(5)   | C01E | N00V | C01S | C01Y | 1.0(6)    |
| Ag04 | N00N | C011 | C01K | 179.1(4)  | C01E | C01W | C024 | C01Y | 0.3(7)    |
| Ag04 | N00N | C01R | C01O | -179.7(4) | C01F | N00R | C010 | C011 | -177.4(4) |

| A    | B    | C    | D    | Angle/°   | A    | B    | C    | D    | Angle/°   |
|------|------|------|------|-----------|------|------|------|------|-----------|
| Ag04 | N00R | C010 | C011 | -1.9(5)   | C01F | N00R | C010 | C01C | 0.9(6)    |
| Ag04 | N00R | C010 | C01C | 176.4(3)  | C01F | C01N | C01P | C01C | 0.1(6)    |
| Ag04 | N00R | C01F | C01N | -174.5(3) | C01G | C00Y | C016 | C01V | -0.2(7)   |
| N00L | C00X | C015 | C01Z | 1.9(8)    | C01H | C012 | C01L | N00U | -170.3(4) |
| N00L | C012 | C01H | C01Z | 0.7(7)    | C01H | C012 | C01L | C00Z | 9.9(6)    |
| N00L | C012 | C01L | N00U | 9.1(5)    | C01J | N00Q | C00W | C013 | 179.0(4)  |
| N00L | C012 | C01L | C00Z | -170.7(4) | C01J | N00Q | C00W | C01A | -1.0(6)   |
| N00N | C011 | C01K | C026 | 0.4(8)    | C01L | N00U | C01M | C01I | -2.0(6)   |
| N00O | C01D | C01G | C00Y | -0.4(7)   | C01L | C00Z | C01B | C01I | -1.3(7)   |
| N00Q | C00W | C013 | N014 | -10.4(5)  | C01L | C012 | C01H | C01Z | -179.9(4) |
| N00Q | C00W | C013 | C022 | 170.6(4)  | C01M | N00U | C01L | C00Z | 0.8(6)    |
| N00Q | C00W | C01A | C017 | 0.5(6)    | C01M | N00U | C01L | C012 | -179.0(3) |
| N00R | C010 | C011 | N00N | 3.5(6)    | C01Q | O00I | C01U | C01X | 78.4(5)   |
| N00R | C010 | C011 | C01K | -179.0(5) | C01Q | O00I | C01U | C028 | -159.2(4) |
| N00R | C010 | C01C | C01P | -1.8(6)   | C01R | N00N | C011 | C010 | 177.2(4)  |
| N00R | C01F | C01N | C01P | -1.1(6)   | C01R | N00N | C011 | C01K | -0.3(7)   |

| A    | B    | C    | D    | Angle/°   | A    | B    | C    | D    | Angle/°   |
|------|------|------|------|-----------|------|------|------|------|-----------|
| N00V | C01E | C01W | C024 | -1.2(7)   | C01R | C01O | C026 | C01K | -0.8(10)  |
| N00V | C01S | C01V | N00O | -8.4(5)   | C01S | N00V | C01E | C01W | 0.6(6)    |
| N00V | C01S | C01V | C016 | 169.4(4)  | C01S | C01Y | C024 | C01W | 1.1(7)    |
| N00V | C01S | C01Y | C024 | -1.9(7)   | C01U | O00I | C01Q | S005 | -176.8(3) |
| C00W | N00Q | C01J | C019 | 0.3(6)    | C01U | O00I | C01Q | O00T | 3.5(6)    |
| C00W | C013 | N014 | Ag03 | 11.3(5)   | C01V | N00O | C01D | C01G | 1.3(6)    |
| C00W | C013 | N014 | C021 | -178.0(4) | C01V | C01S | C01Y | C024 | 177.0(4)  |
| C00W | C013 | C022 | C025 | 178.8(4)  | C01Y | C01S | C01V | N00O | 172.7(4)  |
| C00X | N00L | C012 | C01H | -0.3(6)   | C01Y | C01S | C01V | C016 | -9.5(6)   |
| C00X | N00L | C012 | C01L | -179.7(4) | C020 | O00D | C018 | S006 | 177.5(3)  |
| C00X | C015 | C01Z | C01H | -1.4(8)   | C020 | O00D | C018 | O00P | -2.9(7)   |
| C00Y | C016 | C01V | N00O | 1.1(6)    | C021 | C023 | C025 | C022 | 1.6(8)    |
| C00Y | C016 | C01V | C01S | -176.6(4) | C022 | C013 | N014 | Ag03 | -169.6(3) |
| C00Z | C01B | C01I | C01M | 0.2(7)    | C022 | C013 | N014 | C021 | 1.1(6)    |
| C010 | N00R | C01F | C01N | 0.6(6)    | C026 | C01O | C01R | N00N | 0.9(8)    |

<sup>1</sup>+X,-1+Y,+Z

**Table S7. Hydrogen Atom Coordinates ( $\text{\AA}\times 10^4$ ) and Isotropic Displacement Parameters ( $\text{\AA}^2\times 10^3$ ) for 1.**

| Atom | $x$     | $y$      | $z$     | U(eq) |
|------|---------|----------|---------|-------|
| H00X | 4504.59 | 9765.27  | 7015.67 | 37    |
| H00Y | 2500.96 | 7071.03  | 7732.32 | 37    |
| H00Z | 2591.5  | 11866.86 | 7618.56 | 34    |
| H015 | 4626.85 | 10186.98 | 7834.54 | 47    |
| H016 | 1982.51 | 6979.52  | 7071.89 | 33    |
| H017 | 5117.93 | -2912.87 | 3469.83 | 43    |
| H019 | 4321.38 | -1992.56 | 3475.02 | 42    |
| H01A | 5563.04 | -2629.56 | 4174.84 | 37    |
| H01B | 1867.14 | 12049.4  | 7205.12 | 41    |
| H01C | 4750.43 | 2630.66  | 3465.82 | 35    |
| H01D | 3527.11 | 4968.51  | 6890.26 | 34    |
| H01E | 2297.88 | 5276.33  | 5023.12 | 37    |
| H01F | 5018.15 | 3748.08  | 5081.39 | 35    |
| H01G | 3283.36 | 6052.36  | 7639.4  | 39    |
| H01H | 3223.49 | 11123.56 | 7983.1  | 42    |

| Atom | $x$     | $y$      | $z$     | U(eq) |
|------|---------|----------|---------|-------|
| H01I | 1839.53 | 11195.56 | 6387.09 | 41    |
| H01J | 3989.71 | -928.37  | 4188.22 | 39    |
| H01K | 4060.88 | 3162.27  | 3212.59 | 61    |
| H01M | 2522.64 | 10193.22 | 6011.13 | 37    |
| H01N | 5647.92 | 2720.86  | 4608.82 | 39    |
| H01O | 2787.97 | 5437.46  | 3495.12 | 52    |
| H01P | 5510.48 | 2145.09  | 3781.62 | 40    |
| H01R | 3022.91 | 5823.99  | 4293.98 | 37    |
| H01L | 2538.61 | 1904.03  | 4079.17 | 87    |
| H01Q | 2355.29 | -80.44   | 3892.87 | 87    |
| H01S | 2893.68 | 166.39   | 4062.61 | 87    |
| H01U | 4749.42 | 3328.65  | 6775.48 | 39    |
| H01W | 1499.23 | 6020.38  | 5006.37 | 42    |
| H01T | 5321.54 | 4959.5   | 6314.45 | 80    |
| H01V | 5525.73 | 4537.87  | 6842.86 | 80    |
| H01X | 5336.02 | 6578.22  | 6712.07 | 80    |



| Atom | <i>x</i> | <i>y</i> | <i>z</i> | U(eq) |
|------|----------|----------|----------|-------|
| H01Y | 1534.38  | 6525.56  | 6459.91  | 40    |
| H01Z | 3971.82  | 10812.18 | 8333.57  | 52    |
| H020 | 2459.51  | -1333.6  | 4674.5   | 49    |
| H021 | 5133.63  | 525.2    | 6078.72  | 39    |
| H022 | 5897.71  | -2732.09 | 4872.51  | 44    |
| H023 | 5898.89  | -546.76  | 6218.15  | 43    |
| H024 | 1109.56  | 6642.85  | 5735.58  | 46    |
| H025 | 6277.27  | -2260.23 | 5611.35  | 50    |
| H026 | 3306.38  | 4062.94  | 2954.92  | 73    |
| H02A | 1879.21  | 341.45   | 5113.8   | 97    |
| H02B | 1699.85  | 8.9      | 4571.91  | 97    |
| H02C | 1903.07  | 2001.7   | 4728.35  | 97    |
| H02D | 4745.2   | 6507.95  | 7398.57  | 92    |
| H02E | 4920.97  | 4476.59  | 7556.25  | 92    |

#### Crystal structure determination

**Crystal Data** for C<sub>48</sub>H<sub>46</sub>Ag<sub>4</sub>F<sub>12</sub>N<sub>8</sub>O<sub>4</sub>P<sub>2</sub>S<sub>2</sub> (*M* = 1584.47 g/mol): orthorhombic, space group Pca2<sub>1</sub> (no. 29), *a* = 28.2245(7) Å, *b* = 7.1755(2) Å, *c* = 27.6678(7) Å, *V* = 5603.4(3) Å<sup>3</sup>, *Z* = 4, *T* = 150.0 K,  $\mu(\text{MoK}\alpha)$  = 1.600 mm<sup>-1</sup>, *D*<sub>calc</sub> = 1.878 g/cm<sup>3</sup>, 73429 reflections measured (1.442° ≤ 2 $\Theta$  ≤ 56.406°), 13261 unique (*R*<sub>int</sub> = 0.0291, *R*<sub>sigma</sub> = 0.0263) which were used in all calculations. The final *R*<sub>1</sub> was 0.0245 (*I* > 2 $\sigma$ (*I*)) and *wR*<sub>2</sub> was 0.0518 (all data).

## Refinement model description

Number of restraints - 1, number of constraints - unknown.

Details:

1. Fixed Uiso

At 1.2 times of:

All C(H) groups

At 1.5 times of:

All C(H,H,H) groups

2.a Ternary CH refined with riding coordinates:

C01U(H01U), C020(H020)

2.b Aromatic/amide H refined with riding coordinates:

C00X(H00X), C00Y(H00Y), C00Z(H00Z), C015(H015), C016(H016), C017(H017),  
C019(H019), C01A(H01A), C01B(H01B), C01C(H01C), C01D(H01D), C01E(H01E),  
C01F(H01F), C01G(H01G), C01H(H01H), C01I(H01I), C01J(H01J), C01K(H01K),  
C01M(H01M), C01N(H01N), C01O(H01O), C01P(H01P), C01R(H01R), C01W(H01W),  
C01Y(H01Y), C01Z(H01Z), C021(H021), C022(H022), C023(H023), C024(H024),  
C025(H025), C026(H026)

2.c Idealised Me refined as rotating group:

C01T(H01l,H01q,H01s), C01X(H01t,H01v,H01x), C027(H02a,H02b,H02c), C028(H02d,  
H02e,H02f)

## Table S8. Crystal data and structure refinement for 2.

|                     |                                                                                              |
|---------------------|----------------------------------------------------------------------------------------------|
| Identification code | 2                                                                                            |
| Empirical formula   | C <sub>34</sub> H <sub>38</sub> Au <sub>2</sub> O <sub>4</sub> P <sub>2</sub> S <sub>2</sub> |
| Formula weight      | 1030.63                                                                                      |
| Temperature/K       | 150.02                                                                                       |
| Crystal system      | monoclinic                                                                                   |
| Space group         | P2 <sub>1</sub> /n                                                                           |
| a/Å                 | 11.7462(9)                                                                                   |
| b/Å                 | 39.197(3)                                                                                    |

|                                                                |                                                                |
|----------------------------------------------------------------|----------------------------------------------------------------|
| $c/\text{\AA}$                                                 | 15.6529(15)                                                    |
| $\alpha/^\circ$                                                | 90                                                             |
| $\beta/^\circ$                                                 | 107.882(4)                                                     |
| $\gamma/^\circ$                                                | 90                                                             |
| Volume/ $\text{\AA}^3$                                         | 6858.7(10)                                                     |
| Z                                                              | 8                                                              |
| $\rho_{\text{calc}}/\text{g}/\text{cm}^3$                      | 1.996                                                          |
| $\mu/\text{mm}^{-1}$                                           | 8.798                                                          |
| F(000)                                                         | 3952.0                                                         |
| Crystal size/ $\text{mm}^3$                                    | $0.24 \times 0.18 \times 0.11$                                 |
| Radiation                                                      | MoK $\alpha$ ( $\lambda = 0.71073$ )                           |
| 2 $\Theta$ range for data collection/ $^\circ$ 2.078 to 54.206 |                                                                |
| Index ranges                                                   | $-14 \leq h \leq 15, -48 \leq k \leq 50, -20 \leq l \leq 11$   |
| Reflections collected                                          | 56967                                                          |
| Independent reflections                                        | 15085 [ $R_{\text{int}} = 0.0374, R_{\text{sigma}} = 0.0434$ ] |
| Data/restraints/parameters                                     | 15085/7/724                                                    |
| Goodness-of-fit on $F^2$                                       | 1.158                                                          |

Final R indexes [ $I \geq 2\sigma(I)$ ]  $R_1 = 0.0952$ ,  $wR_2 = 0.2167$

Final R indexes [all data]  $R_1 = 0.1174$ ,  $wR_2 = 0.2270$

Largest diff. peak/hole /  $e \text{ \AA}^{-3}$  5.65/-5.54

**Table S9 Fractional Atomic Coordinates ( $\times 10^4$ ) and Equivalent Isotropic Displacement Parameters ( $\text{\AA}^2 \times 10^3$ ) for 2.  $U_{eq}$  is defined as 1/3 of the trace of the orthogonalised  $U_{ij}$  tensor.**

| Atom              | <i>x</i>  | <i>y</i>  | <i>z</i>   | $U_{eq}$  |
|-------------------|-----------|-----------|------------|-----------|
| Au <sup>(1)</sup> | 2116.9(6) | 1874.9(2) | -1446.6(5) | 33.12(18) |
| Au <sup>(2)</sup> | 2667.3(6) | 606.6(2)  | 1627.0(5)  | 34.35(19) |
| Au <sup>(3)</sup> | 2322.7(6) | 587.1(2)  | 3681.4(5)  | 34.30(19) |
| Au <sup>(4)</sup> | 2445.5(6) | 1931.3(2) | 6497.4(5)  | 34.97(19) |
| C <sup>(1)</sup>  | 4001(14)  | 1206(4)   | -1504(11)  | 25(3)     |
| C <sup>(2)</sup>  | 3962(18)  | 851(5)    | -1517(13)  | 40(4)     |
| C <sup>(3)</sup>  | 4490(20)  | 678(6)    | -2054(16)  | 50(6)     |
| C <sup>(4)</sup>  | 5072(18)  | 844(6)    | -2563(13)  | 41(5)     |
| C <sup>(5)</sup>  | 5113(17)  | 1198(6)   | -2542(13)  | 39(4)     |
| C <sup>(6)</sup>  | 4579(16)  | 1376(5)   | -2032(12)  | 34(4)     |

**Table S9 Fractional Atomic Coordinates ( $\times 10^4$ ) and Equivalent Isotropic Displacement Parameters ( $\text{\AA}^2 \times 10^3$ ) for 2.  $U_{\text{eq}}$  is defined as 1/3 of the trace of the orthogonalised  $U_{ij}$  tensor.**

| Atom              | <i>x</i> | <i>y</i> | <i>z</i> | $U(\text{eq})$ |
|-------------------|----------|----------|----------|----------------|
| C <sup>(7)</sup>  | 4716(15) | 1616(5)  | 51(11)   | 30(4)          |
| C <sup>(8)</sup>  | 4775(18) | 1952(5)  | 324(13)  | 39(4)          |
| C <sup>(9)</sup>  | 5811(18) | 2074(6)  | 962(14)  | 44(5)          |
| C <sup>(10)</sup> | 6780(20) | 1861(5)  | 1315(15) | 46(5)          |
| C <sup>(11)</sup> | 6725(19) | 1522(5)  | 1046(15) | 47(5)          |
| C <sup>(12)</sup> | 5684(17) | 1406(5)  | 413(13)  | 36(4)          |
| C <sup>(13)</sup> | 5020(30) | 334(10)  | 1390(30) | 115(6)         |
| C <sup>(14)</sup> | 6790(20) | 261(7)   | 870(20)  | 76(9)          |
| C <sup>(15)</sup> | 7694(17) | 576(6)   | 1252(17) | 57(7)          |
| C <sup>(16)</sup> | 7520(20) | -81(4)   | 842(19)  | 55(7)          |
| C <sup>(17)</sup> | 2692(17) | 1152(5)  | -211(13) | 34(4)          |
| C <sup>(18)</sup> | 2085(15) | 1327(5)  | 401(12)  | 30(4)          |
| C <sup>(19)</sup> | 57(15)   | 858(5)   | 106(12)  | 30(4)          |
| C <sup>(20)</sup> | -934(15) | 1067(5)  | -230(13) | 32(4)          |

**Table S9 Fractional Atomic Coordinates ( $\times 10^4$ ) and Equivalent Isotropic Displacement Parameters ( $\text{\AA}^2 \times 10^3$ ) for 2.  $U_{\text{eq}}$  is defined as 1/3 of the trace of the orthogonalised  $U_{ij}$  tensor.**

| Atom              | <i>x</i>  | <i>y</i> | <i>z</i>  | $U(\text{eq})$ |
|-------------------|-----------|----------|-----------|----------------|
| C <sup>(21)</sup> | -1975(18) | 929(6)   | -857(14)  | 45(5)          |
| C <sup>(22)</sup> | -1981(18) | 597(5)   | -1117(13) | 39(4)          |
| C <sup>(23)</sup> | -993(19)  | 395(5)   | -786(14)  | 41(5)          |
| C <sup>(24)</sup> | 8(16)     | 519(4)   | -166(13)  | 33(4)          |
| C <sup>(25)</sup> | 798(15)   | 1283(5)  | 1700(12)  | 31(4)          |
| C <sup>(26)</sup> | 177(17)   | 1108(5)  | 2187(13)  | 36(4)          |
| C <sup>(27)</sup> | -369(19)  | 1299(7)  | 2717(13)  | 49(6)          |
| C <sup>(28)</sup> | -269(19)  | 1654(6)  | 2759(13)  | 44(5)          |
| C <sup>(29)</sup> | 390(20)   | 1816(6)  | 2295(15)  | 49(5)          |
| C <sup>(30)</sup> | 900(20)   | 1632(5)  | 1766(15)  | 45(5)          |
| C <sup>(31)</sup> | 3933(15)  | 1310(5)  | 3747(12)  | 32(4)          |
| C <sup>(32)</sup> | 4380(17)  | 1196(7)  | 3069(12)  | 47(5)          |
| C <sup>(33)</sup> | 4650(18)  | 1441(7)  | 2506(13)  | 48(5)          |
| C <sup>(34)</sup> | 4470(20)  | 1787(7)  | 2600(15)  | 52(6)          |

**Table S9 Fractional Atomic Coordinates ( $\times 10^4$ ) and Equivalent Isotropic Displacement Parameters ( $\text{\AA}^2 \times 10^3$ ) for 2.  $U_{\text{eq}}$  is defined as 1/3 of the trace of the orthogonalised  $U_{\text{ij}}$  tensor.**

| Atom              | $x$      | $y$     | $z$      | $U(\text{eq})$ |
|-------------------|----------|---------|----------|----------------|
| C <sup>(35)</sup> | 4030(20) | 1892(6) | 3263(19) | 58(7)          |
| C <sup>(36)</sup> | 3763(19) | 1654(5) | 3848(17) | 48(5)          |
| C <sup>(37)</sup> | 5056(14) | 836(4)  | 5110(11) | 24(3)          |
| C <sup>(38)</sup> | 5211(14) | 484(4)  | 5312(11) | 25(3)          |
| C <sup>(39)</sup> | 6311(16) | 368(4)  | 5843(13) | 32(4)          |
| C <sup>(40)</sup> | 7233(17) | 595(5)  | 6187(13) | 38(4)          |
| C <sup>(41)</sup> | 7080(16) | 927(5)  | 5987(13) | 37(4)          |
| C <sup>(42)</sup> | 5996(15) | 1058(5) | 5440(13) | 33(4)          |
| C <sup>(43)</sup> | 3050(15) | 1200(4) | 5287(11) | 28(4)          |
| C <sup>(44)</sup> | 1738(14) | 1314(4) | 4914(12) | 29(4)          |
| C <sup>(45)</sup> | 855(13)  | 1206(4) | 6454(10) | 22(3)          |
| C <sup>(46)</sup> | 357(15)  | 1310(5) | 7099(11) | 31(4)          |
| C <sup>(47)</sup> | 88(18)   | 1076(7) | 7665(13) | 52(6)          |
| C <sup>(48)</sup> | 321(19)  | 734(6)  | 7578(16) | 55(6)          |

**Table S9 Fractional Atomic Coordinates ( $\times 10^4$ ) and Equivalent Isotropic Displacement Parameters ( $\text{\AA}^2 \times 10^3$ ) for 2.  $U_{\text{eq}}$  is defined as 1/3 of the trace of the orthogonalised  $U_{ij}$  tensor.**

| Atom              | <i>x</i>  | <i>y</i> | <i>z</i> | $U(\text{eq})$ |
|-------------------|-----------|----------|----------|----------------|
| C <sup>(49)</sup> | 787(19)   | 632(6)   | 6923(14) | 43(5)          |
| C <sup>(50)</sup> | 1056(16)  | 866(5)   | 6366(13) | 33(4)          |
| C <sup>(51)</sup> | -282(15)  | 1693(4)  | 5064(12) | 29(4)          |
| C <sup>(52)</sup> | -1240(16) | 1473(5)  | 4740(13) | 39(4)          |
| C <sup>(53)</sup> | -2347(17) | 1597(6)  | 4190(15) | 49(6)          |
| C <sup>(54)</sup> | -2486(16) | 1942(5)  | 3978(13) | 40(5)          |
| C <sup>(55)</sup> | -1514(19) | 2156(5)  | 4292(14) | 43(5)          |
| C <sup>(56)</sup> | -423(17)  | 2032(5)  | 4839(14) | 40(4)          |
| C <sup>(57)</sup> | -150(20)  | 338(6)   | 3761(17) | 84(2)          |
| C <sup>(58)</sup> | -2015(15) | 283(4)   | 4105(14) | 33(2)          |
| C <sup>(59)</sup> | -2715(15) | -53(4)   | 4014(14) | 33(2)          |
| C <sup>(60)</sup> | -2791(15) | 641(4)   | 3739(14) | 33(2)          |
| C <sup>(61)</sup> | 4950(20)  | 2158(7)  | 6475(19) | 85(2)          |
| C <sup>(62)</sup> | 6720(20)  | 2252(7)  | 6030(20) | 76(9)          |



**Table S9 Fractional Atomic Coordinates ( $\times 10^4$ ) and Equivalent Isotropic Displacement Parameters ( $\text{\AA}^2 \times 10^3$ ) for 2.  $U_{\text{eq}}$  is defined as 1/3 of the trace of the orthogonalised  $U_{ij}$  tensor.**

| Atom              | <i>x</i>  | <i>y</i> | <i>z</i>  | $U(\text{eq})$ |
|-------------------|-----------|----------|-----------|----------------|
| C <sup>(63)</sup> | 7447(15)  | 2575(4)  | 6100(15)  | 33(4)          |
| C <sup>(64)</sup> | 7536(16)  | 1894(5)  | 6431(17)  | 47(5)          |
| C <sup>(65)</sup> | -240(20)  | 2111(6)  | -1247(18) | 95(3)          |
| C <sup>(66)</sup> | -2030(30) | 2202(7)  | -610(30)  | 81(9)          |
| C <sup>(67)</sup> | -2788(16) | 2550(4)  | -726(14)  | 34(4)          |
| C <sup>(68)</sup> | -2883(15) | 1859(4)  | -951(15)  | 38(5)          |
| O <sup>(1)</sup>  | -1203(16) | 2314(5)  | -1218(17) | 95(3)          |
| O <sup>(2)</sup>  | -38(17)   | 1867(4)  | -723(16)  | 95(3)          |
| O <sup>(3)</sup>  | 4880(20)  | 609(6)   | 900(20)   | 115(6)         |
| O <sup>(4)</sup>  | 5890(20)  | 192(6)   | 1310(20)  | 115(6)         |
| O <sup>(5)</sup>  | 4772(18)  | 1902(5)  | 5957(15)  | 85(2)          |
| O <sup>(6)</sup>  | 5861(18)  | 2343(5)  | 6535(15)  | 85(2)          |
| O <sup>(7)</sup>  | -1168(16) | 197(4)   | 3572(15)  | 84(2)          |
| O <sup>(8)</sup>  | 4(16)     | 584(4)   | 4255(14)  | 84(2)          |

**Table S9 Fractional Atomic Coordinates ( $\times 10^4$ ) and Equivalent Isotropic Displacement Parameters ( $\text{\AA}^2 \times 10^3$ ) for 2.  $U_{\text{eq}}$  is defined as 1/3 of the trace of the orthogonalised  $U_{ij}$  tensor.**

| Atom             | $x$     | $y$        | $z$      | $U(\text{eq})$ |
|------------------|---------|------------|----------|----------------|
| P <sup>(2)</sup> | 1394(4) | 1025.3(11) | 974(3)   | 26.8(9)        |
| P <sup>(3)</sup> | 3601(4) | 987.1(11)  | 4447(3)  | 26.2(9)        |
| P <sup>(4)</sup> | 1177(4) | 1531.9(11) | 5732(3)  | 25.2(9)        |
| P <sup>(5)</sup> | 3402(4) | 1459.7(11) | -784(3)  | 24.7(9)        |
| S <sup>(1)</sup> | 637(7)  | 2276.1(19) | -1957(7) | 95(3)          |
| S <sup>(2)</sup> | 4119(6) | 196.1(16)  | 2107(6)  | 85(3)          |
| S <sup>(3)</sup> | 825(6)  | 202.1(17)  | 3066(6)  | 84(2)          |
| S <sup>(4)</sup> | 3944(7) | 2321.1(19) | 7121(6)  | 85(2)          |

**Table S10. Anisotropic Displacement Parameters ( $\text{\AA}^2 \times 10^3$ ) for 2. The Anisotropic displacement factor exponent takes the form:  $-2\pi^2[h^2a^{*2}U_{11}+2hka^*b^*U_{12}+\dots]$ .**

| Atom              | $U_{11}$ | $U_{22}$ | $U_{33}$ | $U_{23}$ | $U_{13}$ | $U_{12}$ |
|-------------------|----------|----------|----------|----------|----------|----------|
| Au <sup>(1)</sup> | 29.6(3)  | 26.5(3)  | 39.6(4)  | -0.9(3)  | 5.2(3)   | 2.2(3)   |
| Au <sup>(2)</sup> | 22.6(3)  | 24.9(3)  | 52.6(4)  | 5.3(3)   | 7.3(3)   | 2.1(2)   |

**Table S10. Anisotropic Displacement Parameters ( $\text{\AA}^2 \times 10^3$ ) for 2. The Anisotropic displacement factor exponent takes the form:  $-2\pi^2[h^2a^{*2}U_{11}+2hka^*b^*U_{12}+\dots]$ .**

| Atom              | $U_{11}$ | $U_{22}$ | $U_{33}$ | $U_{23}$ | $U_{13}$ | $U_{12}$ |
|-------------------|----------|----------|----------|----------|----------|----------|
| Au <sup>(3)</sup> | 18.7(3)  | 25.6(3)  | 53.4(5)  | -4.8(3)  | 3.6(3)   | -0.1(2)  |
| Au <sup>(4)</sup> | 31.4(3)  | 28.1(4)  | 41.0(4)  | -1.4(3)  | 4.5(3)   | -6.5(3)  |
| C <sup>(1)</sup>  | 23(8)    | 30(9)    | 19(8)    | 0(6)     | 5(6)     | -1(6)    |
| C <sup>(2)</sup>  | 44(11)   | 46(12)   | 34(10)   | 2(9)     | 19(9)    | 2(9)     |
| C <sup>(3)</sup>  | 51(12)   | 32(11)   | 55(13)   | -8(10)   | 0(11)    | 12(9)    |
| C <sup>(4)</sup>  | 45(11)   | 56(13)   | 25(9)    | -9(9)    | 13(9)    | 12(10)   |
| C <sup>(5)</sup>  | 36(10)   | 57(13)   | 29(10)   | 1(9)     | 16(8)    | 8(9)     |
| C <sup>(6)</sup>  | 35(9)    | 45(11)   | 25(9)    | -1(8)    | 12(8)    | -5(8)    |
| C <sup>(7)</sup>  | 29(8)    | 38(10)   | 20(8)    | -4(7)    | 4(7)     | -8(7)    |
| C <sup>(8)</sup>  | 42(10)   | 35(11)   | 39(11)   | -3(8)    | 11(9)    | 1(8)     |
| C <sup>(9)</sup>  | 42(11)   | 42(12)   | 42(11)   | -10(9)   | 5(9)     | -13(9)   |
| C <sup>(10)</sup> | 50(12)   | 32(11)   | 44(12)   | 4(9)     | -2(10)   | -5(9)    |
| C <sup>(11)</sup> | 42(11)   | 34(11)   | 51(13)   | 3(9)     | -8(10)   | 3(9)     |
| C <sup>(12)</sup> | 40(10)   | 30(10)   | 35(10)   | -3(8)    | 8(8)     | -2(8)    |

**Table S10. Anisotropic Displacement Parameters ( $\text{\AA}^2 \times 10^3$ ) for 2. The Anisotropic displacement factor exponent takes the form:  $-2\pi^2[h^2a^{*2}U_{11}+2hka^*b^*U_{12}+\dots]$ .**

| Atom              | U <sub>11</sub> | U <sub>22</sub> | U <sub>33</sub> | U <sub>23</sub> | U <sub>13</sub> | U <sub>12</sub> |
|-------------------|-----------------|-----------------|-----------------|-----------------|-----------------|-----------------|
| C <sup>(13)</sup> | 89(10)          | 98(12)          | 198(19)         | -3(12)          | 104(12)         | -10(9)          |
| C <sup>(14)</sup> | 54(15)          | 58(17)          | 100(20)         | 12(15)          | -7(15)          | -9(13)          |
| C <sup>(15)</sup> | 27(10)          | 65(15)          | 67(15)          | -42(13)         | -2(10)          | -15(10)         |
| C <sup>(16)</sup> | 66(14)          | 12(8)           | 120(20)         | 0(10)           | 69(15)          | -5(8)           |
| C <sup>(17)</sup> | 37(10)          | 34(10)          | 38(10)          | 9(8)            | 18(8)           | 4(8)            |
| C <sup>(18)</sup> | 23(8)           | 33(9)           | 32(9)           | -5(7)           | 7(7)            | -11(7)          |
| C <sup>(19)</sup> | 30(9)           | 30(9)           | 37(10)          | -5(7)           | 18(8)           | -8(7)           |
| C <sup>(20)</sup> | 28(8)           | 25(9)           | 40(10)          | -3(7)           | 6(8)            | -3(7)           |
| C <sup>(21)</sup> | 33(10)          | 60(14)          | 41(11)          | 4(10)           | 11(9)           | 7(9)            |
| C <sup>(22)</sup> | 39(10)          | 42(11)          | 31(9)           | 1(8)            | 4(8)            | -16(9)          |
| C <sup>(23)</sup> | 58(13)          | 29(10)          | 41(11)          | 5(8)            | 19(10)          | 1(9)            |
| C <sup>(24)</sup> | 36(9)           | 17(8)           | 44(11)          | 2(7)            | 11(8)           | 1(7)            |
| C <sup>(25)</sup> | 21(8)           | 34(10)          | 33(9)           | 0(7)            | 2(7)            | 4(7)            |
| C <sup>(26)</sup> | 40(10)          | 26(9)           | 35(10)          | 4(7)            | 2(8)            | 3(8)            |

**Table S10. Anisotropic Displacement Parameters ( $\text{\AA}^2 \times 10^3$ ) for 2. The Anisotropic displacement factor exponent takes the form:  $-2\pi^2[h^2a^{*2}U_{11}+2hka^*b^*U_{12}+\dots]$ .**

| Atom              | $U_{11}$ | $U_{22}$ | $U_{33}$ | $U_{23}$ | $U_{13}$ | $U_{12}$ |
|-------------------|----------|----------|----------|----------|----------|----------|
| C <sup>(27)</sup> | 40(11)   | 82(17)   | 28(10)   | 2(10)    | 15(9)    | 11(11)   |
| C <sup>(28)</sup> | 46(11)   | 48(13)   | 34(10)   | -6(9)    | 6(9)     | 19(10)   |
| C <sup>(29)</sup> | 69(15)   | 38(12)   | 52(13)   | -5(10)   | 33(12)   | 5(10)    |
| C <sup>(30)</sup> | 53(12)   | 35(11)   | 54(13)   | -7(9)    | 27(11)   | -4(9)    |
| C <sup>(31)</sup> | 22(8)    | 35(10)   | 33(10)   | 1(8)     | -1(7)    | 0(7)     |
| C <sup>(32)</sup> | 35(10)   | 81(17)   | 22(9)    | -8(10)   | 5(8)     | -16(10)  |
| C <sup>(33)</sup> | 40(11)   | 76(17)   | 24(10)   | -11(10)  | 7(8)     | -8(11)   |
| C <sup>(34)</sup> | 44(12)   | 75(17)   | 35(11)   | 13(11)   | 11(10)   | -6(11)   |
| C <sup>(35)</sup> | 54(13)   | 41(13)   | 88(19)   | 27(12)   | 33(14)   | 7(10)    |
| C <sup>(36)</sup> | 44(11)   | 40(12)   | 67(15)   | 16(10)   | 30(11)   | 7(9)     |
| C <sup>(37)</sup> | 19(7)    | 28(9)    | 25(8)    | -2(6)    | 10(6)    | 7(6)     |
| C <sup>(38)</sup> | 29(8)    | 10(7)    | 36(9)    | -7(6)    | 11(7)    | 0(6)     |
| C <sup>(39)</sup> | 39(10)   | 15(8)    | 41(10)   | 0(7)     | 9(8)     | 11(7)    |
| C <sup>(40)</sup> | 38(10)   | 38(10)   | 32(9)    | -6(8)    | 0(8)     | 15(8)    |

**Table S10. Anisotropic Displacement Parameters ( $\text{\AA}^2 \times 10^3$ ) for 2. The Anisotropic displacement factor exponent takes the form:  $-2\pi^2[h^2a^{*2}U_{11}+2hka^*b^*U_{12}+\dots]$ .**

| Atom              | $U_{11}$ | $U_{22}$ | $U_{33}$ | $U_{23}$ | $U_{13}$ | $U_{12}$ |
|-------------------|----------|----------|----------|----------|----------|----------|
| C <sup>(41)</sup> | 25(9)    | 45(11)   | 42(11)   | -5(9)    | 11(8)    | -7(8)    |
| C <sup>(42)</sup> | 26(8)    | 26(9)    | 46(11)   | 0(8)     | 8(8)     | -1(7)    |
| C <sup>(43)</sup> | 28(8)    | 30(9)    | 25(8)    | 9(7)     | 8(7)     | 9(7)     |
| C <sup>(44)</sup> | 25(8)    | 29(9)    | 28(9)    | -7(7)    | 2(7)     | -5(7)    |
| C <sup>(45)</sup> | 18(7)    | 31(9)    | 16(7)    | -1(6)    | 4(6)     | 1(6)     |
| C <sup>(46)</sup> | 26(8)    | 48(11)   | 18(8)    | -3(7)    | 4(7)     | 7(8)     |
| C <sup>(47)</sup> | 34(10)   | 100(20)  | 24(10)   | 1(11)    | 10(8)    | -6(11)   |
| C <sup>(48)</sup> | 43(12)   | 56(15)   | 60(15)   | 35(12)   | 6(11)    | -12(10)  |
| C <sup>(49)</sup> | 45(11)   | 46(12)   | 39(11)   | 6(9)     | 13(9)    | -4(9)    |
| C <sup>(50)</sup> | 35(9)    | 27(9)    | 39(10)   | 1(8)     | 17(8)    | -5(7)    |
| C <sup>(51)</sup> | 24(8)    | 29(9)    | 35(9)    | -4(7)    | 9(7)     | 4(7)     |
| C <sup>(52)</sup> | 31(9)    | 39(11)   | 42(11)   | 7(9)     | 4(8)     | -4(8)    |
| C <sup>(53)</sup> | 26(9)    | 64(15)   | 46(12)   | 20(11)   | -5(9)    | -12(9)   |
| C <sup>(54)</sup> | 28(9)    | 50(12)   | 33(10)   | 6(9)     | -5(8)    | 16(8)    |

**Table S10. Anisotropic Displacement Parameters ( $\text{\AA}^2 \times 10^3$ ) for 2. The Anisotropic displacement factor exponent takes the form:  $-2\pi^2[h^2a^{*2}U_{11}+2hka^*b^*U_{12}+\dots]$ .**

| Atom              | $U_{11}$ | $U_{22}$ | $U_{33}$ | $U_{23}$ | $U_{13}$ | $U_{12}$ |
|-------------------|----------|----------|----------|----------|----------|----------|
| C <sup>(55)</sup> | 53(12)   | 27(10)   | 48(12)   | -1(9)    | 13(10)   | 12(9)    |
| C <sup>(56)</sup> | 32(9)    | 36(11)   | 48(12)   | 1(9)     | 7(9)     | 7(8)     |
| C <sup>(57)</sup> | 60(3)    | 40(3)    | 117(6)   | 4(3)     | -26(4)   | -16(3)   |
| C <sup>(58)</sup> | 24(5)    | 19(5)    | 60(7)    | 2(5)     | 19(5)    | 1(4)     |
| C <sup>(59)</sup> | 24(5)    | 19(5)    | 60(7)    | 2(5)     | 19(5)    | 1(4)     |
| C <sup>(60)</sup> | 24(5)    | 19(5)    | 60(7)    | 2(5)     | 19(5)    | 1(4)     |
| C <sup>(61)</sup> | 77(4)    | 47(3)    | 103(5)   | 1(3)     | -14(4)   | -24(3)   |
| C <sup>(62)</sup> | 56(16)   | 65(18)   | 110(30)  | -9(17)   | 33(17)   | -13(13)  |
| C <sup>(63)</sup> | 29(8)    | 9(7)     | 70(13)   | -13(8)   | 28(9)    | -6(6)    |
| C <sup>(64)</sup> | 20(8)    | 33(10)   | 80(16)   | 6(10)    | 3(9)     | 10(7)    |
| C <sup>(65)</sup> | 64(4)    | 44(3)    | 139(7)   | -10(4)   | -25(4)   | 14(3)    |
| C <sup>(66)</sup> | 68(18)   | 44(15)   | 130(30)  | 16(17)   | 30(19)   | 6(13)    |
| C <sup>(67)</sup> | 40(10)   | 17(8)    | 64(13)   | -8(8)    | 41(10)   | -3(7)    |
| C <sup>(68)</sup> | 23(8)    | 18(8)    | 64(13)   | -16(8)   | 0(8)     | 2(6)     |

**Table S10. Anisotropic Displacement Parameters ( $\text{\AA}^2 \times 10^3$ ) for 2. The Anisotropic displacement factor exponent takes the form:  $-2\pi^2[h^2a^{*2}U_{11}+2hka^*b^*U_{12}+\dots]$ .**

| Atom             | $U_{11}$ | $U_{22}$ | $U_{33}$ | $U_{23}$ | $U_{13}$ | $U_{12}$ |
|------------------|----------|----------|----------|----------|----------|----------|
| O <sup>(1)</sup> | 64(4)    | 44(3)    | 139(7)   | -10(4)   | -25(4)   | 14(3)    |
| O <sup>(2)</sup> | 64(4)    | 44(3)    | 139(7)   | -10(4)   | -25(4)   | 14(3)    |
| O <sup>(3)</sup> | 89(10)   | 98(12)   | 198(19)  | -3(12)   | 104(12)  | -10(9)   |
| O <sup>(4)</sup> | 89(10)   | 98(12)   | 198(19)  | -3(12)   | 104(12)  | -10(9)   |
| O <sup>(5)</sup> | 77(4)    | 47(3)    | 103(5)   | 1(3)     | -14(4)   | -24(3)   |
| O <sup>(6)</sup> | 77(4)    | 47(3)    | 103(5)   | 1(3)     | -14(4)   | -24(3)   |
| O <sup>(7)</sup> | 60(3)    | 40(3)    | 117(6)   | 4(3)     | -26(4)   | -16(3)   |
| O <sup>(8)</sup> | 60(3)    | 40(3)    | 117(6)   | 4(3)     | -26(4)   | -16(3)   |
| P <sup>(2)</sup> | 19.8(19) | 23(2)    | 36(2)    | 1.5(18)  | 6.2(18)  | -2.6(16) |
| P <sup>(3)</sup> | 17.3(18) | 24(2)    | 35(2)    | -2.7(18) | 4.1(17)  | 3.9(15)  |
| P <sup>(4)</sup> | 26(2)    | 24(2)    | 26(2)    | -1.7(17) | 9.3(17)  | -0.4(16) |
| P <sup>(5)</sup> | 28(2)    | 22(2)    | 24(2)    | -0.4(16) | 8.5(17)  | 2.1(16)  |
| S <sup>(1)</sup> | 64(4)    | 44(3)    | 139(7)   | -10(4)   | -25(4)   | 14(3)    |
| S <sup>(2)</sup> | 50(4)    | 34(3)    | 134(7)   | -5(4)    | -25(4)   | 17(3)    |



**Table S10. Anisotropic Displacement Parameters ( $\text{\AA}^2 \times 10^3$ ) for 2. The Anisotropic displacement factor exponent takes the form:  $-2\pi^2[h^2a^{*2}U_{11}+2hka^*b^*U_{12}+\dots]$ .**

| Atom             | $U_{11}$ | $U_{22}$ | $U_{33}$ | $U_{23}$ | $U_{13}$ | $U_{12}$ |
|------------------|----------|----------|----------|----------|----------|----------|
| S <sup>(3)</sup> | 60(3)    | 40(3)    | 117(6)   | 4(3)     | -26(4)   | -16(3)   |
| S <sup>(4)</sup> | 77(4)    | 47(3)    | 103(5)   | 1(3)     | -14(4)   | -24(3)   |

**Table S11. Bond Lengths for 2**

| Atom              | Atom               | Length/ $\text{\AA}$ | Atom              | Atom              | Length/ $\text{\AA}$ |
|-------------------|--------------------|----------------------|-------------------|-------------------|----------------------|
| Au <sup>(1)</sup> | Au <sup>(4)1</sup> | 3.3641(12)           | C <sup>(31)</sup> | C <sup>(36)</sup> | 1.38(3)              |
| Au <sup>(1)</sup> | P <sup>(5)</sup>   | 2.246(4)             | C <sup>(31)</sup> | P <sup>(3)</sup>  | 1.792(19)            |
| Au <sup>(1)</sup> | S <sup>(1)</sup>   | 2.298(7)             | C <sup>(32)</sup> | C <sup>(33)</sup> | 1.40(3)              |
| Au <sup>(2)</sup> | Au <sup>(3)</sup>  | 3.3631(12)           | C <sup>(33)</sup> | C <sup>(34)</sup> | 1.39(3)              |
| Au <sup>(2)</sup> | P <sup>(2)</sup>   | 2.244(4)             | C <sup>(34)</sup> | C <sup>(35)</sup> | 1.36(3)              |
| Au <sup>(2)</sup> | S <sup>(2)</sup>   | 2.296(6)             | C <sup>(35)</sup> | C <sup>(36)</sup> | 1.41(3)              |
| Au <sup>(3)</sup> | P <sup>(3)</sup>   | 2.246(4)             | C <sup>(37)</sup> | C <sup>(38)</sup> | 1.42(2)              |
| Au <sup>(3)</sup> | S <sup>(3)</sup>   | 2.294(6)             | C <sup>(37)</sup> | C <sup>(42)</sup> | 1.37(2)              |
| Au <sup>(4)</sup> | P <sup>(4)</sup>   | 2.238(4)             | C <sup>(37)</sup> | P <sup>(3)</sup>  | 1.805(16)            |
| Au <sup>(4)</sup> | S <sup>(4)</sup>   | 2.308(7)             | C <sup>(38)</sup> | C <sup>(39)</sup> | 1.38(2)              |

| Atom              | Atom              | Length/Å  | Atom              | Atom              | Length/Å  |
|-------------------|-------------------|-----------|-------------------|-------------------|-----------|
| C <sup>(1)</sup>  | C <sup>(2)</sup>  | 1.39(3)   | C <sup>(39)</sup> | C <sup>(40)</sup> | 1.38(3)   |
| C <sup>(1)</sup>  | C <sup>(6)</sup>  | 1.39(2)   | C <sup>(40)</sup> | C <sup>(41)</sup> | 1.34(3)   |
| C <sup>(1)</sup>  | P <sup>(5)</sup>  | 1.799(17) | C <sup>(41)</sup> | C <sup>(42)</sup> | 1.40(3)   |
| C <sup>(2)</sup>  | C <sup>(3)</sup>  | 1.37(3)   | C <sup>(43)</sup> | C <sup>(44)</sup> | 1.54(2)   |
| C <sup>(3)</sup>  | C <sup>(4)</sup>  | 1.36(3)   | C <sup>(43)</sup> | P <sup>(3)</sup>  | 1.836(17) |
| C <sup>(4)</sup>  | C <sup>(5)</sup>  | 1.39(3)   | C <sup>(44)</sup> | P <sup>(4)</sup>  | 1.822(17) |
| C <sup>(5)</sup>  | C <sup>(6)</sup>  | 1.35(3)   | C <sup>(45)</sup> | C <sup>(46)</sup> | 1.37(2)   |
| C <sup>(7)</sup>  | C <sup>(8)</sup>  | 1.38(3)   | C <sup>(45)</sup> | C <sup>(50)</sup> | 1.37(2)   |
| C <sup>(7)</sup>  | C <sup>(12)</sup> | 1.38(3)   | C <sup>(45)</sup> | P <sup>(4)</sup>  | 1.821(16) |
| C <sup>(7)</sup>  | P <sup>(5)</sup>  | 1.796(17) | C <sup>(46)</sup> | C <sup>(47)</sup> | 1.38(3)   |
| C <sup>(8)</sup>  | C <sup>(9)</sup>  | 1.40(3)   | C <sup>(47)</sup> | C <sup>(48)</sup> | 1.38(4)   |
| C <sup>(9)</sup>  | C <sup>(10)</sup> | 1.38(3)   | C <sup>(48)</sup> | C <sup>(49)</sup> | 1.36(3)   |
| C <sup>(10)</sup> | C <sup>(11)</sup> | 1.39(3)   | C <sup>(49)</sup> | C <sup>(50)</sup> | 1.37(3)   |
| C <sup>(11)</sup> | C <sup>(12)</sup> | 1.39(3)   | C <sup>(51)</sup> | C <sup>(52)</sup> | 1.38(3)   |
| C <sup>(13)</sup> | O <sup>(3)</sup>  | 1.30(4)   | C <sup>(51)</sup> | C <sup>(56)</sup> | 1.37(3)   |
| C <sup>(13)</sup> | O <sup>(4)</sup>  | 1.21(4)   | C <sup>(51)</sup> | P <sup>(4)</sup>  | 1.824(17) |

| Atom              | Atom              | Length/Å  | Atom              | Atom              | Length/Å  |
|-------------------|-------------------|-----------|-------------------|-------------------|-----------|
| C <sup>(13)</sup> | S <sup>(2)</sup>  | 1.838(18) | C <sup>(52)</sup> | C <sup>(53)</sup> | 1.41(3)   |
| C <sup>(14)</sup> | C <sup>(15)</sup> | 1.62(3)   | C <sup>(53)</sup> | C <sup>(54)</sup> | 1.39(3)   |
| C <sup>(14)</sup> | C <sup>(16)</sup> | 1.60(3)   | C <sup>(54)</sup> | C <sup>(55)</sup> | 1.38(3)   |
| C <sup>(14)</sup> | O <sup>(4)</sup>  | 1.44(4)   | C <sup>(55)</sup> | C <sup>(56)</sup> | 1.39(3)   |
| C <sup>(17)</sup> | C <sup>(18)</sup> | 1.52(2)   | C <sup>(57)</sup> | O <sup>(7)</sup>  | 1.26(3)   |
| C <sup>(17)</sup> | P <sup>(5)</sup>  | 1.849(18) | C <sup>(57)</sup> | O <sup>(8)</sup>  | 1.217(17) |
| C <sup>(18)</sup> | P <sup>(2)</sup>  | 1.820(17) | C <sup>(57)</sup> | S <sup>(3)</sup>  | 1.887(17) |
| C <sup>(19)</sup> | C <sup>(20)</sup> | 1.39(3)   | C <sup>(58)</sup> | C <sup>(59)</sup> | 1.54(2)   |
| C <sup>(19)</sup> | C <sup>(24)</sup> | 1.39(2)   | C <sup>(58)</sup> | C <sup>(60)</sup> | 1.67(2)   |
| C <sup>(19)</sup> | P <sup>(2)</sup>  | 1.852(18) | C <sup>(58)</sup> | O <sup>(7)</sup>  | 1.52(3)   |
| C <sup>(20)</sup> | C <sup>(21)</sup> | 1.42(3)   | C <sup>(61)</sup> | O <sup>(5)</sup>  | 1.27(3)   |
| C <sup>(21)</sup> | C <sup>(22)</sup> | 1.36(3)   | C <sup>(61)</sup> | O <sup>(6)</sup>  | 1.27(3)   |
| C <sup>(22)</sup> | C <sup>(23)</sup> | 1.37(3)   | C <sup>(61)</sup> | S <sup>(4)</sup>  | 1.884(18) |
| C <sup>(23)</sup> | C <sup>(24)</sup> | 1.36(3)   | C <sup>(62)</sup> | C <sup>(63)</sup> | 1.51(3)   |
| C <sup>(25)</sup> | C <sup>(26)</sup> | 1.39(3)   | C <sup>(62)</sup> | C <sup>(64)</sup> | 1.70(3)   |
| C <sup>(25)</sup> | C <sup>(30)</sup> | 1.37(3)   | C <sup>(62)</sup> | O <sup>(6)</sup>  | 1.50(4)   |

**Atom Atom Length/Å Atom Atom Length/Å**

C<sup>(25)</sup> P<sup>(2)</sup> 1.815(19) C<sup>(65)</sup> O<sup>(1)</sup> 1.396(17)

C<sup>(26)</sup> C<sup>(27)</sup> 1.41(3) C<sup>(65)</sup> O<sup>(2)</sup> 1.234(17)

C<sup>(27)</sup> C<sup>(28)</sup> 1.40(3) C<sup>(65)</sup> S<sup>(1)</sup> 1.849(17)

C<sup>(28)</sup> C<sup>(29)</sup> 1.37(3) C<sup>(66)</sup> C<sup>(67)</sup> 1.61(3)

C<sup>(29)</sup> C<sup>(30)</sup> 1.36(3) C<sup>(66)</sup> C<sup>(68)</sup> 1.67(3)

C<sup>(31)</sup> C<sup>(32)</sup> 1.40(3) C<sup>(66)</sup> O<sup>(1)</sup> 1.61(4)

<sup>1</sup>+X,<sup>+</sup>Y,-1+Z

**Table S12. Bond Angles for 2.**

| Atom Atom Atom   |                   |                    | Angle/°    | Atom Atom Atom    |                   |                   | Angle/°   |
|------------------|-------------------|--------------------|------------|-------------------|-------------------|-------------------|-----------|
| P <sup>(5)</sup> | Au <sup>(1)</sup> | Au <sup>(4)1</sup> | 103.38(11) | C <sup>(44)</sup> | C <sup>(43)</sup> | P <sup>(3)</sup>  | 113.1(12) |
| P <sup>(5)</sup> | Au <sup>(1)</sup> | S <sup>(1)</sup>   | 170.4(3)   | C <sup>(43)</sup> | C <sup>(44)</sup> | P <sup>(4)</sup>  | 113.9(11) |
| S <sup>(1)</sup> | Au <sup>(1)</sup> | Au <sup>(4)1</sup> | 85.4(3)    | C <sup>(46)</sup> | C <sup>(45)</sup> | P <sup>(4)</sup>  | 117.7(13) |
| P <sup>(2)</sup> | Au <sup>(2)</sup> | Au <sup>(3)</sup>  | 101.15(12) | C <sup>(50)</sup> | C <sup>(45)</sup> | C <sup>(46)</sup> | 119.2(16) |
| P <sup>(2)</sup> | Au <sup>(2)</sup> | S <sup>(2)</sup>   | 170.2(3)   | C <sup>(50)</sup> | C <sup>(45)</sup> | P <sup>(4)</sup>  | 123.1(13) |
| S <sup>(2)</sup> | Au <sup>(2)</sup> | Au <sup>(3)</sup>  | 88.1(3)    | C <sup>(45)</sup> | C <sup>(46)</sup> | C <sup>(47)</sup> | 120.6(19) |
| P <sup>(3)</sup> | Au <sup>(3)</sup> | Au <sup>(2)</sup>  | 103.73(12) | C <sup>(46)</sup> | C <sup>(47)</sup> | C <sup>(48)</sup> | 119(2)    |

**Table S12. Bond Angles for 2.**

| Atom Atom Atom    |                   |                    | Angle/°    | Atom Atom Atom    |                   |                   | Angle/°   |
|-------------------|-------------------|--------------------|------------|-------------------|-------------------|-------------------|-----------|
| P <sup>(3)</sup>  | Au <sup>(3)</sup> | S <sup>(3)</sup>   | 169.9(3)   | C <sup>(49)</sup> | C <sup>(48)</sup> | C <sup>(47)</sup> | 119.8(19) |
| S <sup>(3)</sup>  | Au <sup>(3)</sup> | Au <sup>(2)</sup>  | 85.1(3)    | C <sup>(48)</sup> | C <sup>(49)</sup> | C <sup>(50)</sup> | 120(2)    |
| P <sup>(4)</sup>  | Au <sup>(4)</sup> | Au <sup>(1)2</sup> | 102.32(11) | C <sup>(49)</sup> | C <sup>(50)</sup> | C <sup>(45)</sup> | 120.6(18) |
| P <sup>(4)</sup>  | Au <sup>(4)</sup> | S <sup>(4)</sup>   | 170.0(3)   | C <sup>(52)</sup> | C <sup>(51)</sup> | P <sup>(4)</sup>  | 120.7(14) |
| S <sup>(4)</sup>  | Au <sup>(4)</sup> | Au <sup>(1)2</sup> | 86.3(3)    | C <sup>(56)</sup> | C <sup>(51)</sup> | C <sup>(52)</sup> | 119.2(17) |
| C <sup>(2)</sup>  | C <sup>(1)</sup>  | P <sup>(5)</sup>   | 123.0(13)  | C <sup>(56)</sup> | C <sup>(51)</sup> | P <sup>(4)</sup>  | 120.0(14) |
| C <sup>(6)</sup>  | C <sup>(1)</sup>  | C <sup>(2)</sup>   | 119.3(17)  | C <sup>(51)</sup> | C <sup>(52)</sup> | C <sup>(53)</sup> | 120.2(19) |
| C <sup>(6)</sup>  | C <sup>(1)</sup>  | P <sup>(5)</sup>   | 117.7(14)  | C <sup>(54)</sup> | C <sup>(53)</sup> | C <sup>(52)</sup> | 120.0(19) |
| C <sup>(3)</sup>  | C <sup>(2)</sup>  | C <sup>(1)</sup>   | 119.1(19)  | C <sup>(55)</sup> | C <sup>(54)</sup> | C <sup>(53)</sup> | 118.9(17) |
| C <sup>(4)</sup>  | C <sup>(3)</sup>  | C <sup>(2)</sup>   | 122(2)     | C <sup>(54)</sup> | C <sup>(55)</sup> | C <sup>(56)</sup> | 120.7(19) |
| C <sup>(3)</sup>  | C <sup>(4)</sup>  | C <sup>(5)</sup>   | 118.8(18)  | C <sup>(51)</sup> | C <sup>(56)</sup> | C <sup>(55)</sup> | 120.9(19) |
| C <sup>(6)</sup>  | C <sup>(5)</sup>  | C <sup>(4)</sup>   | 120.6(19)  | O <sup>(7)</sup>  | C <sup>(57)</sup> | S <sup>(3)</sup>  | 116.1(17) |
| C <sup>(5)</sup>  | C <sup>(6)</sup>  | C <sup>(1)</sup>   | 120.4(19)  | O <sup>(8)</sup>  | C <sup>(57)</sup> | O <sup>(7)</sup>  | 116(2)    |
| C <sup>(8)</sup>  | C <sup>(7)</sup>  | P <sup>(5)</sup>   | 120.1(15)  | O <sup>(8)</sup>  | C <sup>(57)</sup> | S <sup>(3)</sup>  | 126.1(19) |
| C <sup>(12)</sup> | C <sup>(7)</sup>  | C <sup>(8)</sup>   | 119.1(17)  | C <sup>(59)</sup> | C <sup>(58)</sup> | C <sup>(60)</sup> | 117.8(14) |

**Table S12. Bond Angles for 2.**

| Atom Atom Atom    |                   |                   | Angle/°   | Atom Atom Atom    |                   |                   | Angle/°   |
|-------------------|-------------------|-------------------|-----------|-------------------|-------------------|-------------------|-----------|
| C <sup>(12)</sup> | C <sup>(7)</sup>  | P <sup>(5)</sup>  | 120.8(14) | O <sup>(7)</sup>  | C <sup>(58)</sup> | C <sup>(59)</sup> | 100.4(14) |
| C <sup>(7)</sup>  | C <sup>(8)</sup>  | C <sup>(9)</sup>  | 119.8(19) | O <sup>(7)</sup>  | C <sup>(58)</sup> | C <sup>(60)</sup> | 112.1(15) |
| C <sup>(10)</sup> | C <sup>(9)</sup>  | C <sup>(8)</sup>  | 120(2)    | O <sup>(5)</sup>  | C <sup>(61)</sup> | O <sup>(6)</sup>  | 118(2)    |
| C <sup>(9)</sup>  | C <sup>(10)</sup> | C <sup>(11)</sup> | 120.0(19) | O <sup>(5)</sup>  | C <sup>(61)</sup> | S <sup>(4)</sup>  | 127(2)    |
| C <sup>(10)</sup> | C <sup>(11)</sup> | C <sup>(12)</sup> | 118.6(19) | O <sup>(6)</sup>  | C <sup>(61)</sup> | S <sup>(4)</sup>  | 114.9(19) |
| C <sup>(7)</sup>  | C <sup>(12)</sup> | C <sup>(11)</sup> | 122.1(18) | C <sup>(63)</sup> | C <sup>(62)</sup> | C <sup>(64)</sup> | 115(2)    |
| O <sup>(3)</sup>  | C <sup>(13)</sup> | S <sup>(2)</sup>  | 128(3)    | O <sup>(6)</sup>  | C <sup>(62)</sup> | C <sup>(63)</sup> | 103(2)    |
| O <sup>(4)</sup>  | C <sup>(13)</sup> | O <sup>(3)</sup>  | 105(2)    | O <sup>(6)</sup>  | C <sup>(62)</sup> | C <sup>(64)</sup> | 113(2)    |
| O <sup>(4)</sup>  | C <sup>(13)</sup> | S <sup>(2)</sup>  | 127(3)    | O <sup>(1)</sup>  | C <sup>(65)</sup> | S <sup>(1)</sup>  | 115.2(17) |
| C <sup>(16)</sup> | C <sup>(14)</sup> | C <sup>(15)</sup> | 110(2)    | O <sup>(2)</sup>  | C <sup>(65)</sup> | O <sup>(1)</sup>  | 114.4(19) |
| O <sup>(4)</sup>  | C <sup>(14)</sup> | C <sup>(15)</sup> | 118(3)    | O <sup>(2)</sup>  | C <sup>(65)</sup> | S <sup>(1)</sup>  | 130.0(18) |
| O <sup>(4)</sup>  | C <sup>(14)</sup> | C <sup>(16)</sup> | 109(2)    | C <sup>(67)</sup> | C <sup>(66)</sup> | C <sup>(68)</sup> | 113(2)    |
| C <sup>(18)</sup> | C <sup>(17)</sup> | P <sup>(5)</sup>  | 112.2(12) | C <sup>(67)</sup> | C <sup>(66)</sup> | O <sup>(1)</sup>  | 96.5(18)  |
| C <sup>(17)</sup> | C <sup>(18)</sup> | P <sup>(2)</sup>  | 112.4(12) | O <sup>(1)</sup>  | C <sup>(66)</sup> | C <sup>(68)</sup> | 116(2)    |
| C <sup>(20)</sup> | C <sup>(19)</sup> | C <sup>(24)</sup> | 119.7(17) | C <sup>(65)</sup> | O <sup>(1)</sup>  | C <sup>(66)</sup> | 120.1(19) |

**Table S12. Bond Angles for 2.**

| Atom Atom Atom    |                   |                   | Angle/°   | Atom Atom Atom    |                  |                   | Angle/°   |
|-------------------|-------------------|-------------------|-----------|-------------------|------------------|-------------------|-----------|
| C <sup>(20)</sup> | C <sup>(19)</sup> | P <sup>(2)</sup>  | 119.6(13) | C <sup>(13)</sup> | O <sup>(4)</sup> | C <sup>(14)</sup> | 137(3)    |
| C <sup>(24)</sup> | C <sup>(19)</sup> | P <sup>(2)</sup>  | 120.5(14) | C <sup>(61)</sup> | O <sup>(6)</sup> | C <sup>(62)</sup> | 121(2)    |
| C <sup>(19)</sup> | C <sup>(20)</sup> | C <sup>(21)</sup> | 118.7(17) | C <sup>(57)</sup> | O <sup>(7)</sup> | C <sup>(58)</sup> | 120.3(19) |
| C <sup>(22)</sup> | C <sup>(21)</sup> | C <sup>(20)</sup> | 119.7(19) | C <sup>(18)</sup> | P <sup>(2)</sup> | Au <sup>(2)</sup> | 111.4(6)  |
| C <sup>(21)</sup> | C <sup>(22)</sup> | C <sup>(23)</sup> | 120.8(19) | C <sup>(18)</sup> | P <sup>(2)</sup> | C <sup>(19)</sup> | 105.9(8)  |
| C <sup>(24)</sup> | C <sup>(23)</sup> | C <sup>(22)</sup> | 120.7(19) | C <sup>(19)</sup> | P <sup>(2)</sup> | Au <sup>(2)</sup> | 111.9(6)  |
| C <sup>(23)</sup> | C <sup>(24)</sup> | C <sup>(19)</sup> | 120.3(18) | C <sup>(25)</sup> | P <sup>(2)</sup> | Au <sup>(2)</sup> | 117.0(6)  |
| C <sup>(26)</sup> | C <sup>(25)</sup> | P <sup>(2)</sup>  | 115.9(14) | C <sup>(25)</sup> | P <sup>(2)</sup> | C <sup>(18)</sup> | 105.2(8)  |
| C <sup>(30)</sup> | C <sup>(25)</sup> | C <sup>(26)</sup> | 119.7(18) | C <sup>(25)</sup> | P <sup>(2)</sup> | C <sup>(19)</sup> | 104.6(8)  |
| C <sup>(30)</sup> | C <sup>(25)</sup> | P <sup>(2)</sup>  | 124.3(15) | C <sup>(31)</sup> | P <sup>(3)</sup> | Au <sup>(3)</sup> | 113.7(6)  |
| C <sup>(25)</sup> | C <sup>(26)</sup> | C <sup>(27)</sup> | 118.2(19) | C <sup>(31)</sup> | P <sup>(3)</sup> | C <sup>(37)</sup> | 103.7(8)  |
| C <sup>(28)</sup> | C <sup>(27)</sup> | C <sup>(26)</sup> | 121(2)    | C <sup>(31)</sup> | P <sup>(3)</sup> | C <sup>(43)</sup> | 107.9(8)  |
| C <sup>(29)</sup> | C <sup>(28)</sup> | C <sup>(27)</sup> | 119.3(19) | C <sup>(37)</sup> | P <sup>(3)</sup> | Au <sup>(3)</sup> | 116.0(6)  |
| C <sup>(30)</sup> | C <sup>(29)</sup> | C <sup>(28)</sup> | 120(2)    | C <sup>(37)</sup> | P <sup>(3)</sup> | C <sup>(43)</sup> | 102.5(7)  |
| C <sup>(29)</sup> | C <sup>(30)</sup> | C <sup>(25)</sup> | 122(2)    | C <sup>(43)</sup> | P <sup>(3)</sup> | Au <sup>(3)</sup> | 112.0(6)  |

**Table S12. Bond Angles for 2.**

| Atom Atom Atom    |                   |                   | Angle/°   | Atom Atom Atom    |                  |                   | Angle/°  |
|-------------------|-------------------|-------------------|-----------|-------------------|------------------|-------------------|----------|
| C <sup>(32)</sup> | C <sup>(31)</sup> | P <sup>(3)</sup>  | 116.3(16) | C <sup>(44)</sup> | P <sup>(4)</sup> | Au <sup>(4)</sup> | 112.3(6) |
| C <sup>(36)</sup> | C <sup>(31)</sup> | C <sup>(32)</sup> | 120(2)    | C <sup>(44)</sup> | P <sup>(4)</sup> | C <sup>(51)</sup> | 103.8(8) |
| C <sup>(36)</sup> | C <sup>(31)</sup> | P <sup>(3)</sup>  | 123.6(16) | C <sup>(45)</sup> | P <sup>(4)</sup> | Au <sup>(4)</sup> | 112.9(5) |
| C <sup>(31)</sup> | C <sup>(32)</sup> | C <sup>(33)</sup> | 118(2)    | C <sup>(45)</sup> | P <sup>(4)</sup> | C <sup>(44)</sup> | 107.2(8) |
| C <sup>(34)</sup> | C <sup>(33)</sup> | C <sup>(32)</sup> | 122(2)    | C <sup>(45)</sup> | P <sup>(4)</sup> | C <sup>(51)</sup> | 105.1(8) |
| C <sup>(35)</sup> | C <sup>(34)</sup> | C <sup>(33)</sup> | 119(2)    | C <sup>(51)</sup> | P <sup>(4)</sup> | Au <sup>(4)</sup> | 114.8(6) |
| C <sup>(34)</sup> | C <sup>(35)</sup> | C <sup>(36)</sup> | 121(2)    | C <sup>(1)</sup>  | P <sup>(5)</sup> | Au <sup>(1)</sup> | 116.6(6) |
| C <sup>(31)</sup> | C <sup>(36)</sup> | C <sup>(35)</sup> | 120(2)    | C <sup>(1)</sup>  | P <sup>(5)</sup> | C <sup>(17)</sup> | 105.3(8) |
| C <sup>(38)</sup> | C <sup>(37)</sup> | P <sup>(3)</sup>  | 118.8(12) | C <sup>(7)</sup>  | P <sup>(5)</sup> | Au <sup>(1)</sup> | 113.2(6) |
| C <sup>(42)</sup> | C <sup>(37)</sup> | C <sup>(38)</sup> | 119.9(15) | C <sup>(7)</sup>  | P <sup>(5)</sup> | C <sup>(1)</sup>  | 103.3(8) |
| C <sup>(42)</sup> | C <sup>(37)</sup> | P <sup>(3)</sup>  | 121.3(13) | C <sup>(7)</sup>  | P <sup>(5)</sup> | C <sup>(17)</sup> | 106.6(9) |
| C <sup>(39)</sup> | C <sup>(38)</sup> | C <sup>(37)</sup> | 119.3(15) | C <sup>(17)</sup> | P <sup>(5)</sup> | Au <sup>(1)</sup> | 110.9(6) |
| C <sup>(40)</sup> | C <sup>(39)</sup> | C <sup>(38)</sup> | 119.9(16) | C <sup>(65)</sup> | S <sup>(1)</sup> | Au <sup>(1)</sup> | 93.0(7)  |
| C <sup>(41)</sup> | C <sup>(40)</sup> | C <sup>(39)</sup> | 120.4(17) | C <sup>(13)</sup> | S <sup>(2)</sup> | Au <sup>(2)</sup> | 95.9(13) |
| C <sup>(40)</sup> | C <sup>(41)</sup> | C <sup>(42)</sup> | 122.2(18) | C <sup>(57)</sup> | S <sup>(3)</sup> | Au <sup>(3)</sup> | 95.6(7)  |



**Table S12. Bond Angles for 2.**

| Atom              | Atom              | Atom              | Angle/°   | Atom              | Atom             | Atom              | Angle/° |
|-------------------|-------------------|-------------------|-----------|-------------------|------------------|-------------------|---------|
| C <sup>(37)</sup> | C <sup>(42)</sup> | C <sup>(41)</sup> | 118.4(17) | C <sup>(61)</sup> | S <sup>(4)</sup> | Au <sup>(4)</sup> | 94.1(9) |

<sup>1</sup>+X,+Y,-1+Z; <sup>2</sup>+X,+Y,1+Z

**Table S13. Torsion Angles for 2.**

| A                | B                | C                | D                 | Angle/°    | A                 | B                 | C                 | D                 | Angle/°    |
|------------------|------------------|------------------|-------------------|------------|-------------------|-------------------|-------------------|-------------------|------------|
| C <sup>(1)</sup> | C <sup>(2)</sup> | C <sup>(3)</sup> | C <sup>(4)</sup>  | 1(3)       | C <sup>(40)</sup> | C <sup>(41)</sup> | C <sup>(42)</sup> | C <sup>(37)</sup> | 1(3)       |
| C <sup>(2)</sup> | C <sup>(1)</sup> | C <sup>(6)</sup> | C <sup>(5)</sup>  | -1(3)      | C <sup>(42)</sup> | C <sup>(37)</sup> | C <sup>(38)</sup> | C <sup>(39)</sup> | 0(2)       |
| C <sup>(2)</sup> | C <sup>(1)</sup> | P <sup>(5)</sup> | Au <sup>(1)</sup> | -127.8(14) | C <sup>(42)</sup> | C <sup>(37)</sup> | P <sup>(3)</sup>  | Au <sup>(3)</sup> | 165.0(13)  |
| C <sup>(2)</sup> | C <sup>(1)</sup> | P <sup>(5)</sup> | C <sup>(7)</sup>  | 107.3(16)  | C <sup>(42)</sup> | C <sup>(37)</sup> | P <sup>(3)</sup>  | C <sup>(31)</sup> | 39.6(16)   |
| C <sup>(2)</sup> | C <sup>(1)</sup> | P <sup>(5)</sup> | C <sup>(17)</sup> | -4.3(18)   | C <sup>(42)</sup> | C <sup>(37)</sup> | P <sup>(3)</sup>  | C <sup>(43)</sup> | -72.6(16)  |
| C <sup>(2)</sup> | C <sup>(3)</sup> | C <sup>(4)</sup> | C <sup>(5)</sup>  | -1(3)      | C <sup>(43)</sup> | C <sup>(44)</sup> | P <sup>(4)</sup>  | Au <sup>(4)</sup> | 46.7(14)   |
| C <sup>(3)</sup> | C <sup>(4)</sup> | C <sup>(5)</sup> | C <sup>(6)</sup>  | 0(3)       | C <sup>(43)</sup> | C <sup>(44)</sup> | P <sup>(4)</sup>  | C <sup>(45)</sup> | -77.9(13)  |
| C <sup>(4)</sup> | C <sup>(5)</sup> | C <sup>(6)</sup> | C <sup>(1)</sup>  | 1(3)       | C <sup>(43)</sup> | C <sup>(44)</sup> | P <sup>(4)</sup>  | C <sup>(51)</sup> | 171.2(12)  |
| C <sup>(6)</sup> | C <sup>(1)</sup> | C <sup>(2)</sup> | C <sup>(3)</sup>  | 0(3)       | C <sup>(44)</sup> | C <sup>(43)</sup> | P <sup>(3)</sup>  | Au <sup>(3)</sup> | -47.4(13)  |
| C <sup>(6)</sup> | C <sup>(1)</sup> | P <sup>(5)</sup> | Au <sup>(1)</sup> | 55.6(15)   | C <sup>(44)</sup> | C <sup>(43)</sup> | P <sup>(3)</sup>  | C <sup>(31)</sup> | 78.4(14)   |
| C <sup>(6)</sup> | C <sup>(1)</sup> | P <sup>(5)</sup> | C <sup>(7)</sup>  | -69.3(15)  | C <sup>(44)</sup> | C <sup>(43)</sup> | P <sup>(3)</sup>  | C <sup>(37)</sup> | -172.5(12) |

**Table S13. Torsion Angles for 2.**

| A                 | B                 | C                 | D                 | Angle/°    | A                 | B                 | C                 | D                 | Angle/°    |
|-------------------|-------------------|-------------------|-------------------|------------|-------------------|-------------------|-------------------|-------------------|------------|
| C <sup>(6)</sup>  | C <sup>(1)</sup>  | P <sup>(5)</sup>  | C <sup>(17)</sup> | 179.1(14)  | C <sup>(45)</sup> | C <sup>(46)</sup> | C <sup>(47)</sup> | C <sup>(48)</sup> | 0(3)       |
| C <sup>(7)</sup>  | C <sup>(8)</sup>  | C <sup>(9)</sup>  | C <sup>(10)</sup> | 1(3)       | C <sup>(46)</sup> | C <sup>(45)</sup> | C <sup>(50)</sup> | C <sup>(49)</sup> | -1(3)      |
| C <sup>(8)</sup>  | C <sup>(7)</sup>  | C <sup>(12)</sup> | C <sup>(11)</sup> | 0(3)       | C <sup>(46)</sup> | C <sup>(45)</sup> | P <sup>(4)</sup>  | Au <sup>(4)</sup> | 59.2(13)   |
| C <sup>(8)</sup>  | C <sup>(7)</sup>  | P <sup>(5)</sup>  | Au <sup>(1)</sup> | 9.8(17)    | C <sup>(46)</sup> | C <sup>(45)</sup> | P <sup>(4)</sup>  | C <sup>(44)</sup> | -176.6(13) |
| C <sup>(8)</sup>  | C <sup>(7)</sup>  | P <sup>(5)</sup>  | C <sup>(1)</sup>  | 136.8(15)  | C <sup>(46)</sup> | C <sup>(45)</sup> | P <sup>(4)</sup>  | C <sup>(51)</sup> | -66.6(14)  |
| C <sup>(8)</sup>  | C <sup>(7)</sup>  | P <sup>(5)</sup>  | C <sup>(17)</sup> | -112.5(16) | C <sup>(46)</sup> | C <sup>(47)</sup> | C <sup>(48)</sup> | C <sup>(49)</sup> | -2(3)      |
| C <sup>(8)</sup>  | C <sup>(9)</sup>  | C <sup>(10)</sup> | C <sup>(11)</sup> | -1(3)      | C <sup>(47)</sup> | C <sup>(48)</sup> | C <sup>(49)</sup> | C <sup>(50)</sup> | 2(3)       |
| C <sup>(9)</sup>  | C <sup>(10)</sup> | C <sup>(11)</sup> | C <sup>(12)</sup> | 1(3)       | C <sup>(48)</sup> | C <sup>(49)</sup> | C <sup>(50)</sup> | C <sup>(45)</sup> | 0(3)       |
| C <sup>(10)</sup> | C <sup>(11)</sup> | C <sup>(12)</sup> | C <sup>(7)</sup>  | 0(3)       | C <sup>(50)</sup> | C <sup>(45)</sup> | C <sup>(46)</sup> | C <sup>(47)</sup> | 2(3)       |
| C <sup>(12)</sup> | C <sup>(7)</sup>  | C <sup>(8)</sup>  | C <sup>(9)</sup>  | 0(3)       | C <sup>(50)</sup> | C <sup>(45)</sup> | P <sup>(4)</sup>  | Au <sup>(4)</sup> | -122.7(14) |
| C <sup>(12)</sup> | C <sup>(7)</sup>  | P <sup>(5)</sup>  | Au <sup>(1)</sup> | -168.9(13) | C <sup>(50)</sup> | C <sup>(45)</sup> | P <sup>(4)</sup>  | C <sup>(44)</sup> | 1.5(16)    |
| C <sup>(12)</sup> | C <sup>(7)</sup>  | P <sup>(5)</sup>  | C <sup>(1)</sup>  | -41.9(17)  | C <sup>(50)</sup> | C <sup>(45)</sup> | P <sup>(4)</sup>  | C <sup>(51)</sup> | 111.5(15)  |
| C <sup>(12)</sup> | C <sup>(7)</sup>  | P <sup>(5)</sup>  | C <sup>(17)</sup> | 68.9(17)   | C <sup>(51)</sup> | C <sup>(52)</sup> | C <sup>(53)</sup> | C <sup>(54)</sup> | -1(3)      |
| C <sup>(15)</sup> | C <sup>(14)</sup> | O <sup>(4)</sup>  | C <sup>(13)</sup> | 66(6)      | C <sup>(52)</sup> | C <sup>(51)</sup> | C <sup>(56)</sup> | C <sup>(55)</sup> | 0(3)       |
| C <sup>(16)</sup> | C <sup>(14)</sup> | O <sup>(4)</sup>  | C <sup>(13)</sup> | -167(5)    | C <sup>(52)</sup> | C <sup>(51)</sup> | P <sup>(4)</sup>  | Au <sup>(4)</sup> | -163.9(14) |

**Table S13. Torsion Angles for 2.**

| A                 | B                 | C                 | D                 | Angle/°    | A                 | B                 | C                 | D                 | Angle/°    |
|-------------------|-------------------|-------------------|-------------------|------------|-------------------|-------------------|-------------------|-------------------|------------|
| C <sup>(17)</sup> | C <sup>(18)</sup> | P <sup>(2)</sup>  | Au <sup>(2)</sup> | 49.5(13)   | C <sup>(52)</sup> | C <sup>(51)</sup> | P <sup>(4)</sup>  | C <sup>(44)</sup> | 73.1(17)   |
| C <sup>(17)</sup> | C <sup>(18)</sup> | P <sup>(2)</sup>  | C <sup>(19)</sup> | -72.3(14)  | C <sup>(52)</sup> | C <sup>(51)</sup> | P <sup>(4)</sup>  | C <sup>(45)</sup> | -39.3(17)  |
| C <sup>(17)</sup> | C <sup>(18)</sup> | P <sup>(2)</sup>  | C <sup>(25)</sup> | 177.2(12)  | C <sup>(52)</sup> | C <sup>(53)</sup> | C <sup>(54)</sup> | C <sup>(55)</sup> | 2(3)       |
| C <sup>(18)</sup> | C <sup>(17)</sup> | P <sup>(5)</sup>  | Au <sup>(1)</sup> | -50.5(14)  | C <sup>(53)</sup> | C <sup>(54)</sup> | C <sup>(55)</sup> | C <sup>(56)</sup> | -2(3)      |
| C <sup>(18)</sup> | C <sup>(17)</sup> | P <sup>(5)</sup>  | C <sup>(1)</sup>  | -177.4(12) | C <sup>(54)</sup> | C <sup>(55)</sup> | C <sup>(56)</sup> | C <sup>(51)</sup> | 1(3)       |
| C <sup>(18)</sup> | C <sup>(17)</sup> | P <sup>(5)</sup>  | C <sup>(7)</sup>  | 73.2(14)   | C <sup>(56)</sup> | C <sup>(51)</sup> | C <sup>(52)</sup> | C <sup>(53)</sup> | 0(3)       |
| C <sup>(19)</sup> | C <sup>(20)</sup> | C <sup>(21)</sup> | C <sup>(22)</sup> | 0(3)       | C <sup>(56)</sup> | C <sup>(51)</sup> | P <sup>(4)</sup>  | Au <sup>(4)</sup> | 19.4(17)   |
| C <sup>(20)</sup> | C <sup>(19)</sup> | C <sup>(24)</sup> | C <sup>(23)</sup> | 2(3)       | C <sup>(56)</sup> | C <sup>(51)</sup> | P <sup>(4)</sup>  | C <sup>(44)</sup> | -103.5(16) |
| C <sup>(20)</sup> | C <sup>(19)</sup> | P <sup>(2)</sup>  | Au <sup>(2)</sup> | 166.3(13)  | C <sup>(56)</sup> | C <sup>(51)</sup> | P <sup>(4)</sup>  | C <sup>(45)</sup> | 144.0(15)  |
| C <sup>(20)</sup> | C <sup>(19)</sup> | P <sup>(2)</sup>  | C <sup>(18)</sup> | -72.1(16)  | C <sup>(59)</sup> | C <sup>(58)</sup> | O <sup>(7)</sup>  | C <sup>(57)</sup> | -151(2)    |
| C <sup>(20)</sup> | C <sup>(19)</sup> | P <sup>(2)</sup>  | C <sup>(25)</sup> | 38.8(17)   | C <sup>(60)</sup> | C <sup>(58)</sup> | O <sup>(7)</sup>  | C <sup>(57)</sup> | 83(3)      |
| C <sup>(20)</sup> | C <sup>(21)</sup> | C <sup>(22)</sup> | C <sup>(23)</sup> | 0(3)       | C <sup>(63)</sup> | C <sup>(62)</sup> | O <sup>(6)</sup>  | C <sup>(61)</sup> | 166(3)     |
| C <sup>(21)</sup> | C <sup>(22)</sup> | C <sup>(23)</sup> | C <sup>(24)</sup> | 2(3)       | C <sup>(64)</sup> | C <sup>(62)</sup> | O <sup>(6)</sup>  | C <sup>(61)</sup> | -69(3)     |
| C <sup>(22)</sup> | C <sup>(23)</sup> | C <sup>(24)</sup> | C <sup>(19)</sup> | -3(3)      | C <sup>(67)</sup> | C <sup>(66)</sup> | O <sup>(1)</sup>  | C <sup>(65)</sup> | 172(2)     |
| C <sup>(24)</sup> | C <sup>(19)</sup> | C <sup>(20)</sup> | C <sup>(21)</sup> | -1(3)      | C <sup>(68)</sup> | C <sup>(66)</sup> | O <sup>(1)</sup>  | C <sup>(65)</sup> | -69(3)     |

**Table S13. Torsion Angles for 2.**

| A                 | B                 | C                 | D                 | Angle/°    | A                | B                 | C                 | D                 | Angle/°    |
|-------------------|-------------------|-------------------|-------------------|------------|------------------|-------------------|-------------------|-------------------|------------|
| C <sup>(24)</sup> | C <sup>(19)</sup> | P <sup>(2)</sup>  | Au <sup>(2)</sup> | -9.3(16)   | O <sup>(1)</sup> | C <sup>(65)</sup> | S <sup>(1)</sup>  | Au <sup>(1)</sup> | 171(2)     |
| C <sup>(24)</sup> | C <sup>(19)</sup> | P <sup>(2)</sup>  | C <sup>(18)</sup> | 112.3(15)  | O <sup>(2)</sup> | C <sup>(65)</sup> | O <sup>(1)</sup>  | C <sup>(66)</sup> | -6(4)      |
| C <sup>(24)</sup> | C <sup>(19)</sup> | P <sup>(2)</sup>  | C <sup>(25)</sup> | -136.9(15) | O <sup>(2)</sup> | C <sup>(65)</sup> | S <sup>(1)</sup>  | Au <sup>(1)</sup> | -1(3)      |
| C <sup>(25)</sup> | C <sup>(26)</sup> | C <sup>(27)</sup> | C <sup>(28)</sup> | -1(3)      | O <sup>(3)</sup> | C <sup>(13)</sup> | O <sup>(4)</sup>  | C <sup>(14)</sup> | 5(7)       |
| C <sup>(26)</sup> | C <sup>(25)</sup> | C <sup>(30)</sup> | C <sup>(29)</sup> | 0(3)       | O <sup>(3)</sup> | C <sup>(13)</sup> | S <sup>(2)</sup>  | Au <sup>(2)</sup> | 9(4)       |
| C <sup>(26)</sup> | C <sup>(25)</sup> | P <sup>(2)</sup>  | Au <sup>(2)</sup> | -58.3(15)  | O <sup>(4)</sup> | C <sup>(13)</sup> | S <sup>(2)</sup>  | Au <sup>(2)</sup> | -174(4)    |
| C <sup>(26)</sup> | C <sup>(25)</sup> | P <sup>(2)</sup>  | C <sup>(18)</sup> | 177.5(13)  | O <sup>(5)</sup> | C <sup>(61)</sup> | O <sup>(6)</sup>  | C <sup>(62)</sup> | -2(4)      |
| C <sup>(26)</sup> | C <sup>(25)</sup> | P <sup>(2)</sup>  | C <sup>(19)</sup> | 66.1(15)   | O <sup>(5)</sup> | C <sup>(61)</sup> | S <sup>(4)</sup>  | Au <sup>(4)</sup> | -5(3)      |
| C <sup>(26)</sup> | C <sup>(27)</sup> | C <sup>(28)</sup> | C <sup>(29)</sup> | -2(3)      | O <sup>(6)</sup> | C <sup>(61)</sup> | S <sup>(4)</sup>  | Au <sup>(4)</sup> | 171(2)     |
| C <sup>(27)</sup> | C <sup>(28)</sup> | C <sup>(29)</sup> | C <sup>(30)</sup> | 3(3)       | O <sup>(7)</sup> | C <sup>(57)</sup> | S <sup>(3)</sup>  | Au <sup>(3)</sup> | 175(2)     |
| C <sup>(28)</sup> | C <sup>(29)</sup> | C <sup>(30)</sup> | C <sup>(25)</sup> | -2(4)      | O <sup>(8)</sup> | C <sup>(57)</sup> | O <sup>(7)</sup>  | C <sup>(58)</sup> | -14(4)     |
| C <sup>(30)</sup> | C <sup>(25)</sup> | C <sup>(26)</sup> | C <sup>(27)</sup> | 2(3)       | O <sup>(8)</sup> | C <sup>(57)</sup> | S <sup>(3)</sup>  | Au <sup>(3)</sup> | 8(3)       |
| C <sup>(30)</sup> | C <sup>(25)</sup> | P <sup>(2)</sup>  | Au <sup>(2)</sup> | 123.8(16)  | P <sup>(2)</sup> | C <sup>(19)</sup> | C <sup>(20)</sup> | C <sup>(21)</sup> | -176.5(14) |
| C <sup>(30)</sup> | C <sup>(25)</sup> | P <sup>(2)</sup>  | C <sup>(18)</sup> | -0.4(19)   | P <sup>(2)</sup> | C <sup>(19)</sup> | C <sup>(24)</sup> | C <sup>(23)</sup> | 178.1(15)  |
| C <sup>(30)</sup> | C <sup>(25)</sup> | P <sup>(2)</sup>  | C <sup>(19)</sup> | -111.8(18) | P <sup>(2)</sup> | C <sup>(25)</sup> | C <sup>(26)</sup> | C <sup>(27)</sup> | -176.0(14) |

**Table S13. Torsion Angles for 2.**

| A                 | B                 | C                 | D                 | Angle/°    | A                | B                 | C                 | D                 | Angle/°    |
|-------------------|-------------------|-------------------|-------------------|------------|------------------|-------------------|-------------------|-------------------|------------|
| C <sup>(31)</sup> | C <sup>(32)</sup> | C <sup>(33)</sup> | C <sup>(34)</sup> | -1(3)      | P <sup>(2)</sup> | C <sup>(25)</sup> | C <sup>(30)</sup> | C <sup>(29)</sup> | 177.3(18)  |
| C <sup>(32)</sup> | C <sup>(31)</sup> | C <sup>(36)</sup> | C <sup>(35)</sup> | 1(3)       | P <sup>(3)</sup> | C <sup>(31)</sup> | C <sup>(32)</sup> | C <sup>(33)</sup> | 180.0(14)  |
| C <sup>(32)</sup> | C <sup>(31)</sup> | P <sup>(3)</sup>  | Au <sup>(3)</sup> | -55.8(15)  | P <sup>(3)</sup> | C <sup>(31)</sup> | C <sup>(36)</sup> | C <sup>(35)</sup> | -178.9(17) |
| C <sup>(32)</sup> | C <sup>(31)</sup> | P <sup>(3)</sup>  | C <sup>(37)</sup> | 71.0(15)   | P <sup>(3)</sup> | C <sup>(37)</sup> | C <sup>(38)</sup> | C <sup>(39)</sup> | -177.9(13) |
| C <sup>(32)</sup> | C <sup>(31)</sup> | P <sup>(3)</sup>  | C <sup>(43)</sup> | 179.3(14)  | P <sup>(3)</sup> | C <sup>(37)</sup> | C <sup>(42)</sup> | C <sup>(41)</sup> | 176.7(14)  |
| C <sup>(32)</sup> | C <sup>(33)</sup> | C <sup>(34)</sup> | C <sup>(35)</sup> | 1(3)       | P <sup>(3)</sup> | C <sup>(43)</sup> | C <sup>(44)</sup> | P <sup>(4)</sup>  | -179.1(9)  |
| C <sup>(33)</sup> | C <sup>(34)</sup> | C <sup>(35)</sup> | C <sup>(36)</sup> | 0(4)       | P <sup>(4)</sup> | C <sup>(45)</sup> | C <sup>(46)</sup> | C <sup>(47)</sup> | 179.7(14)  |
| C <sup>(34)</sup> | C <sup>(35)</sup> | C <sup>(36)</sup> | C <sup>(31)</sup> | -1(4)      | P <sup>(4)</sup> | C <sup>(45)</sup> | C <sup>(50)</sup> | C <sup>(49)</sup> | -179.4(15) |
| C <sup>(36)</sup> | C <sup>(31)</sup> | C <sup>(32)</sup> | C <sup>(33)</sup> | 0(3)       | P <sup>(4)</sup> | C <sup>(51)</sup> | C <sup>(52)</sup> | C <sup>(53)</sup> | -177.0(16) |
| C <sup>(36)</sup> | C <sup>(31)</sup> | P <sup>(3)</sup>  | Au <sup>(3)</sup> | 123.8(16)  | P <sup>(4)</sup> | C <sup>(51)</sup> | C <sup>(56)</sup> | C <sup>(55)</sup> | 176.7(16)  |
| C <sup>(36)</sup> | C <sup>(31)</sup> | P <sup>(3)</sup>  | C <sup>(37)</sup> | -109.3(17) | P <sup>(5)</sup> | C <sup>(1)</sup>  | C <sup>(2)</sup>  | C <sup>(3)</sup>  | -176.9(15) |
| C <sup>(36)</sup> | C <sup>(31)</sup> | P <sup>(3)</sup>  | C <sup>(43)</sup> | -1.0(19)   | P <sup>(5)</sup> | C <sup>(1)</sup>  | C <sup>(6)</sup>  | C <sup>(5)</sup>  | 175.7(14)  |
| C <sup>(37)</sup> | C <sup>(38)</sup> | C <sup>(39)</sup> | C <sup>(40)</sup> | 2(3)       | P <sup>(5)</sup> | C <sup>(7)</sup>  | C <sup>(8)</sup>  | C <sup>(9)</sup>  | -178.7(15) |
| C <sup>(38)</sup> | C <sup>(37)</sup> | C <sup>(42)</sup> | C <sup>(41)</sup> | -1(3)      | P <sup>(5)</sup> | C <sup>(7)</sup>  | C <sup>(12)</sup> | C <sup>(11)</sup> | 178.5(16)  |
| C <sup>(38)</sup> | C <sup>(37)</sup> | P <sup>(3)</sup>  | Au <sup>(3)</sup> | -16.8(15)  | P <sup>(5)</sup> | C <sup>(17)</sup> | C <sup>(18)</sup> | P <sup>(2)</sup>  | -179.5(9)  |

**Table S13. Torsion Angles for 2.**

| A                 | B                 | C                 | D                 | Angle/°    | A                | B                 | C                | D                 | Angle/°   |
|-------------------|-------------------|-------------------|-------------------|------------|------------------|-------------------|------------------|-------------------|-----------|
| C <sup>(38)</sup> | C <sup>(37)</sup> | P <sup>(3)</sup>  | C <sup>(31)</sup> | -142.2(13) | S <sup>(1)</sup> | C <sup>(65)</sup> | O <sup>(1)</sup> | C <sup>(66)</sup> | -179(2)   |
| C <sup>(38)</sup> | C <sup>(37)</sup> | P <sup>(3)</sup>  | C <sup>(43)</sup> | 105.6(14)  | S <sup>(2)</sup> | C <sup>(13)</sup> | O <sup>(4)</sup> | C <sup>(14)</sup> | -173(3)   |
| C <sup>(38)</sup> | C <sup>(39)</sup> | C <sup>(40)</sup> | C <sup>(41)</sup> | -2(3)      | S <sup>(3)</sup> | C <sup>(57)</sup> | O <sup>(7)</sup> | C <sup>(58)</sup> | 178.7(15) |
| C <sup>(39)</sup> | C <sup>(40)</sup> | C <sup>(41)</sup> | C <sup>(42)</sup> | 1(3)       | S <sup>(4)</sup> | C <sup>(61)</sup> | O <sup>(6)</sup> | C <sup>(62)</sup> | -178(2)   |

**Table S14. Hydrogen Atom Coordinates (Å×10<sup>4</sup>) and Isotropic Displacement Parameters (Å<sup>2</sup>×10<sup>3</sup>) for 2.**

| Atom             | <i>x</i> | <i>y</i> | <i>z</i> | U(eq) |
|------------------|----------|----------|----------|-------|
| H <sup>(2)</sup> | 3574.89  | 731      | -1158.22 | 48    |
| H <sup>(3)</sup> | 4448.08  | 436.36   | -2073.22 | 60    |
| H <sup>(4)</sup> | 5443.35  | 718.78   | -2924.83 | 50    |
| H <sup>(5)</sup> | 5521.29  | 1316.79  | -2890.48 | 47    |
| H <sup>(6)</sup> | 4597.5   | 1618.27  | -2034.96 | 41    |
| H <sup>(8)</sup> | 4113.73  | 2099.78  | 80.21    | 47    |
| H <sup>(9)</sup> | 5848.08  | 2305.08  | 1154.41  | 52    |

**Table S14. Hydrogen Atom Coordinates ( $\text{\AA}\times 10^4$ ) and Isotropic Displacement Parameters ( $\text{\AA}^2\times 10^3$ ) for 2.**

| Atom               | <i>x</i> | <i>y</i> | <i>z</i> | U(eq) |
|--------------------|----------|----------|----------|-------|
| H <sup>(10)</sup>  | 7487.32  | 1946.43  | 1739.86  | 55    |
| H <sup>(11)</sup>  | 7381.32  | 1372.97  | 1289.07  | 57    |
| H <sup>(12)</sup>  | 5641.53  | 1174.88  | 225.14   | 43    |
| H <sup>(14)</sup>  | 6342.06  | 318.76   | 234.36   | 91    |
| H <sup>(15A)</sup> | 7823.47  | 601.36   | 1897.64  | 85    |
| H <sup>(15B)</sup> | 7349.1   | 786.15   | 941.95   | 85    |
| H <sup>(15C)</sup> | 8460.31  | 529.56   | 1146.55  | 85    |
| H <sup>(16A)</sup> | 7279.48  | -169.65  | 227.17   | 83    |
| H <sup>(16B)</sup> | 7343.97  | -251.12  | 1242.8   | 83    |
| H <sup>(16C)</sup> | 8376.52  | -30.7    | 1037.08  | 83    |
| H <sup>(17A)</sup> | 2090.61  | 1016.33  | -667.14  | 41    |
| H <sup>(17B)</sup> | 3307     | 992.39   | 149.27   | 41    |
| H <sup>(18A)</sup> | 1464.94  | 1485.27  | 39.11    | 36    |
| H <sup>(18B)</sup> | 2684.59  | 1464.48  | 853      | 36    |

**Table S14. Hydrogen Atom Coordinates ( $\text{\AA}\times 10^4$ ) and Isotropic Displacement Parameters ( $\text{\AA}^2\times 10^3$ ) for 2.**

| Atom              | <i>x</i> | <i>y</i> | <i>z</i> | U(eq) |
|-------------------|----------|----------|----------|-------|
| H <sup>(20)</sup> | -916.96  | 1298.36  | -44.18   | 39    |
| H <sup>(21)</sup> | -2664.78 | 1066.9   | -1094.93 | 54    |
| H <sup>(22)</sup> | -2680.45 | 504.18   | -1533.85 | 47    |
| H <sup>(23)</sup> | -1003.44 | 166.74   | -989.2   | 50    |
| H <sup>(24)</sup> | 674.49   | 373.84   | 80.73    | 39    |
| H <sup>(26)</sup> | 122.08   | 866.52   | 2164.47  | 43    |
| H <sup>(27)</sup> | -809.31  | 1185.44  | 3049.26  | 59    |
| H <sup>(28)</sup> | -655.54  | 1782.27  | 3104.97  | 53    |
| H <sup>(29)</sup> | 497.5    | 2056     | 2342.8   | 59    |
| H <sup>(30)</sup> | 1327.55  | 1749.33  | 1433.37  | 54    |
| H <sup>(32)</sup> | 4498.19  | 959.62   | 2989.39  | 56    |
| H <sup>(33)</sup> | 4968.07  | 1368.14  | 2047.08  | 57    |
| H <sup>(34)</sup> | 4645.87  | 1947.5   | 2205.52  | 62    |
| H <sup>(35)</sup> | 3893.72  | 2128.14  | 3332.3   | 70    |



**Table S14. Hydrogen Atom Coordinates ( $\text{\AA}\times 10^4$ ) and Isotropic Displacement Parameters ( $\text{\AA}^2\times 10^3$ ) for 2.**

| Atom               | <i>x</i> | <i>y</i> | <i>z</i> | U(eq) |
|--------------------|----------|----------|----------|-------|
| H <sup>(36)</sup>  | 3467.14  | 1730.98  | 4315.64  | 57    |
| H <sup>(38)</sup>  | 4566.08  | 329.66   | 5084.65  | 30    |
| H <sup>(39)</sup>  | 6432.02  | 131.19   | 5971.35  | 39    |
| H <sup>(40)</sup>  | 7980.48  | 516.22   | 6568.69  | 46    |
| H <sup>(41)</sup>  | 7730.44  | 1078.64  | 6225.32  | 45    |
| H <sup>(42)</sup>  | 5910.71  | 1293.72  | 5298.38  | 40    |
| H <sup>(43A)</sup> | 3132.4   | 1043     | 5796.8   | 33    |
| H <sup>(43B)</sup> | 3554.06  | 1402.94  | 5518.56  | 33    |
| H <sup>(44A)</sup> | 1234.85  | 1110.48  | 4689.99  | 35    |
| H <sup>(44B)</sup> | 1655.27  | 1467.86  | 4397.48  | 35    |
| H <sup>(46)</sup>  | 196.89   | 1545.06  | 7155.26  | 37    |
| H <sup>(47)</sup>  | -254.82  | 1148.72  | 8110.92  | 63    |
| H <sup>(48)</sup>  | 156.87   | 571.28   | 7973.86  | 66    |
| H <sup>(49)</sup>  | 925.57   | 396.25   | 6852.93  | 52    |

**Table S14. Hydrogen Atom Coordinates ( $\text{\AA}\times 10^4$ ) and Isotropic Displacement Parameters ( $\text{\AA}^2\times 10^3$ ) for 2.**

| Atom               | <i>x</i> | <i>y</i> | <i>z</i> | U(eq) |
|--------------------|----------|----------|----------|-------|
| H <sup>(50)</sup>  | 1384.43  | 791.38   | 5914     | 39    |
| H <sup>(52)</sup>  | -1150.43 | 1237.52  | 4889.28  | 47    |
| H <sup>(53)</sup>  | -3000.45 | 1444.98  | 3963.77  | 59    |
| H <sup>(54)</sup>  | -3236.83 | 2028.52  | 3622.66  | 48    |
| H <sup>(55)</sup>  | -1590.34 | 2390.9   | 4133.81  | 51    |
| H <sup>(56)</sup>  | 231.27   | 2183.86  | 5059.94  | 48    |
| H <sup>(58)</sup>  | -1535.25 | 314.78   | 4749.28  | 40    |
| H <sup>(59A)</sup> | -3397.02 | -21.91   | 4242.78  | 49    |
| H <sup>(59B)</sup> | -2189.58 | -231.8   | 4361.45  | 49    |
| H <sup>(59C)</sup> | -3004.92 | -120.14  | 3381.09  | 49    |
| H <sup>(60A)</sup> | -2915.36 | 666.69   | 3093.96  | 49    |
| H <sup>(60B)</sup> | -2344.88 | 837.28   | 4060.16  | 49    |
| H <sup>(60C)</sup> | -3568.18 | 627.04   | 3848     | 49    |
| H <sup>(62)</sup>  | 6257.24  | 2213.28  | 5390.57  | 91    |

**Table S14. Hydrogen Atom Coordinates ( $\text{\AA}\times 10^4$ ) and Isotropic Displacement Parameters ( $\text{\AA}^2\times 10^3$ ) for 2.**

| Atom               | <i>x</i> | <i>y</i> | <i>z</i> | U(eq) |
|--------------------|----------|----------|----------|-------|
| H <sup>(63A)</sup> | 7679.21  | 2661.13  | 6717.73  | 50    |
| H <sup>(63B)</sup> | 6965.05  | 2747.98  | 5694.2   | 50    |
| H <sup>(63C)</sup> | 8167.21  | 2526.91  | 5929.7   | 50    |
| H <sup>(64A)</sup> | 7965.11  | 1824.39  | 6013.16  | 70    |
| H <sup>(64B)</sup> | 6998.54  | 1710.45  | 6488.55  | 70    |
| H <sup>(64C)</sup> | 8112.16  | 1942.3   | 7020.22  | 70    |
| H <sup>(66)</sup>  | -1523.08 | 2173.35  | 31.59    | 97    |
| H <sup>(67A)</sup> | -3202.27 | 2589.24  | -1364.58 | 51    |
| H <sup>(67B)</sup> | -2248.72 | 2741.62  | -484.61  | 51    |
| H <sup>(67C)</sup> | -3377.7  | 2531.52  | -400.66  | 51    |
| H <sup>(68A)</sup> | -3373.52 | 1821.13  | -553.9   | 57    |
| H <sup>(68B)</sup> | -2376.04 | 1659.44  | -935.51  | 57    |
| H <sup>(68C)</sup> | -3405.28 | 1895.75  | -1566.13 | 57    |

### Experimental

Single crystals of C<sub>34</sub>H<sub>38</sub>Au<sub>2</sub>O<sub>4</sub>P<sub>2</sub>S<sub>2</sub> [2]. A suitable crystal was selected and mounted on a **Bruker APEX-II CCD** diffractometer. The crystal was kept at 150.02 K during data collection. Using Olex2 [1], the structure was solved with

the SHELXT [2] structure solution program using Intrinsic Phasing and refined with the SHELXL [3] refinement package using Least Squares minimisation.

1. Dolomanov, O.V., Bourhis, L.J., Gildea, R.J., Howard, J.A.K. & Puschmann, H. (2009), *J. Appl. Cryst.* 42, 339-341.
2. Sheldrick, G.M. (2015). *Acta Cryst.* A71, 3-8.
3. Sheldrick, G.M. (2015). *Acta Cryst.* C71, 3-8.

### Crystal structure determination of [2]

**Crystal Data** for  $C_{34}H_{38}Au_2O_4P_2S_2$  ( $M = 1030.63$  g/mol): monoclinic, space group  $P2_1/n$  (no. 14),  $a = 11.7462(9)$  Å,  $b = 39.197(3)$  Å,  $c = 15.6529(15)$  Å,  $\beta = 107.882(4)^\circ$ ,  $V = 6858.7(10)$  Å<sup>3</sup>,  $Z = 8$ ,  $T = 150.02$  K,  $\mu(\text{MoK}\alpha) = 8.798$  mm<sup>-1</sup>,  $D_{\text{calc}} = 1.996$  g/cm<sup>3</sup>, 56967 reflections measured ( $2.078^\circ \leq 2\theta \leq 54.206^\circ$ ), 15085 unique ( $R_{\text{int}} = 0.0374$ ,  $R_{\text{sigma}} = 0.0434$ ) which were used in all calculations. The final  $R_1$  was 0.0952 ( $I > 2\sigma(I)$ ) and  $wR_2$  was 0.2270 (all data).

### Refinement model description

Number of restraints - 7, number of constraints - unknown.

Details:

#### 1. Twinned data refinement

Scales: 0.9985(4)

0.0015(4)

#### 2. Fixed Uiso

At 1.2 times of:

All C(H) groups, All C(H,H) groups

At 1.5 times of:

All C(H,H,H) groups

#### 3. Restrained distances

S2-C13

1.81 with sigma of 0.02

S4-C61

1.81 with sigma of 0.02

C57-O8

1.2 with sigma of 0.02

C57-S3

1.78 with sigma of 0.02

C65-O2

1.2 with sigma of 0.02

C65-S1

1.78 with sigma of 0.02

C65-O1

1.4 with sigma of 0.02

#### 4. Uiso/Uanis restraints and constraints

Uanis(C13) = Uanis(O3) = Uanis(O4)

Uanis(S1) = Uanis(C65) = Uanis(O1) = Uanis(O2)

Uanis(C61) = Uanis(S4) = Uanis(O5) = Uanis(O6)

Uanis(O7) = Uanis(C57) = Uanis(O8) = Uanis(S3)

Uanis(C58) = Uanis(C60) = Uanis(C59)

#### 5.a Ternary CH refined with riding coordinates:

C14(H14), C58(H58), C62(H62), C66(H66)

#### 5.b Secondary CH2 refined with riding coordinates:

C17(H17A,H17B), C18(H18A,H18B), C43(H43A,H43B), C44(H44A,H44B)

#### 5.c Aromatic/amide H refined with riding coordinates:

C2(H2), C3(H3), C4(H4), C5(H5), C6(H6), C8(H8), C9(H9), C10(H10), C11(H11),  
C12(H12), C20(H20), C21(H21), C22(H22), C23(H23), C24(H24), C26(H26), C27(H27),  
C28(H28), C29(H29), C30(H30), C32(H32), C33(H33), C34(H34), C35(H35),  
C36(H36), C38(H38), C39(H39), C40(H40), C41(H41), C42(H42), C46(H46), C47(H47),  
C48(H48), C49(H49), C50(H50), C52(H52), C53(H53), C54(H54), C55(H55), C56(H56)

#### 5.d Idealised Me refined as rotating group:

C15(H15A,H15B,H15C), C16(H16A,H16B,H16C), C59(H59A,H59B,H59C), C60(H60A,H60B,  
H60C), C63(H63A,H63B,H63C), C64(H64A,H64B,H64C), C67(H67A,H67B,H67C), C68(H68A,  
H68B,H68C)

This report has been created with Olex2, compiled on 2020.11.12 svn.r5f609507 for OlexSys. Please let us know if there are any errors or if you would like to have additional features.
