# Supplementary material
Source: MDPI journal article supplement (https://www.mdpi.com/2304-6740/10/2/19)
Supplement: s1 [file s1]

Archive with 5 entries (5 files):
- 3silver complex.cif
- 4silver_cifcheck.pdf
- 5gold_complex.cif
- 6gold_cifreport.pdf
- inorganics-1519975 - suppl.pdf
