# Supplementary material
Source: MDPI journal article supplement (https://www.mdpi.com/2304-6740/10/2/19)
Supplement: s1 [file s1 › 3silver complex.cif]

data_20wd_wvz_wd4_agbpymtci_0m1
_audit_creation_date               2021-12-04
_audit_creation_method
;
Olex2 1.3
(compiled 2020.11.12 svn.r5f609507 for OlexSys, GUI svn.r6408)
;
_shelx_SHELXL_version_number       '2018/3'
_audit_contact_author_address      ?
_audit_contact_author_email        ?
_audit_contact_author_name         ''
_audit_contact_author_phone        ?
_publ_contact_author_id_orcid      ?
_publ_section_references
;
Dolomanov, O.V., Bourhis, L.J., Gildea, R.J, Howard, J.A.K. & Puschmann, H.
 (2009), J. Appl. Cryst. 42, 339-341.

Sheldrick, G.M. (2015). Acta Cryst. A71, 3-8.

Sheldrick, G.M. (2015). Acta Cryst. C71, 3-8.
;
_chemical_name_common              ?
_chemical_name_systematic          ?
_chemical_formula_moiety           'C48 H46 Ag4 N8 O4 S2, 2(F6 P)'
_chemical_formula_sum              'C48 H46 Ag4 F12 N8 O4 P2 S2'
_chemical_formula_weight           1584.47
_chemical_absolute_configuration   ?
_chemical_melting_point            ?
loop_
  _atom_type_symbol
  _atom_type_description
  _atom_type_scat_dispersion_real
  _atom_type_scat_dispersion_imag
  _atom_type_scat_source
 'C' 'C' 0.0033 0.0016 'International Tables Vol C Tables 4.2.6.8 and 6.1.1.4'
 'H' 'H' 0.0000 0.0000 'International Tables Vol C Tables 4.2.6.8 and 6.1.1.4'
 'Ag' 'Ag' -0.8971 1.1015
 'International Tables Vol C Tables 4.2.6.8 and 6.1.1.4'
 'F' 'F' 0.0171 0.0103 'International Tables Vol C Tables 4.2.6.8 and 6.1.1.4'
 'N' 'N' 0.0061 0.0033 'International Tables Vol C Tables 4.2.6.8 and 6.1.1.4'
 'O' 'O' 0.0106 0.0060 'International Tables Vol C Tables 4.2.6.8 and 6.1.1.4'
 'P' 'P' 0.1023 0.0942 'International Tables Vol C Tables 4.2.6.8 and 6.1.1.4'
 'S' 'S' 0.1246 0.1234 'International Tables Vol C Tables 4.2.6.8 and 6.1.1.4'

_shelx_space_group_comment
;
The symmetry employed for this shelxl refinement is uniquely defined
by the following loop, which should always be used as a source of
symmetry information in preference to the above space-group names.
They are only intended as comments.
;
_space_group_crystal_system        'orthorhombic'
_space_group_IT_number             29
_space_group_name_H-M_alt          'P c a 21'
_space_group_name_Hall             'P 2c -2ac'
loop_
  _space_group_symop_operation_xyz
 'x, y, z'
 '-x, -y, z+1/2'
 'x+1/2, -y, z'
 '-x+1/2, y, z+1/2'

_cell_length_a                     28.2245(7)
_cell_length_b                     7.1755(2)
_cell_length_c                     27.6678(7)
_cell_angle_alpha                  90
_cell_angle_beta                   90
_cell_angle_gamma                  90
_cell_volume                       5603.4(3)
_cell_formula_units_Z              4
_cell_measurement_reflns_used      9846
_cell_measurement_temperature      150(2)
_cell_measurement_theta_max        28.10
_cell_measurement_theta_min        2.64
_shelx_estimated_absorpt_T_max     ?
_shelx_estimated_absorpt_T_min     ?
_exptl_absorpt_coefficient_mu      1.600
_exptl_absorpt_correction_T_max    0.7457
_exptl_absorpt_correction_T_min    0.5754
_exptl_absorpt_correction_type     none
_exptl_absorpt_process_details
;
SADABS-2008/1 (Bruker,2008) was used for absorption correction.
wR2(int) was 0.0939 before and 0.0457 after correction.
The Ratio of minimum to maximum transmission is 0.7716.
The \l/2 correction factor is 0.0015.
;
_exptl_absorpt_special_details     ?
_exptl_crystal_colour              ?
_exptl_crystal_density_diffrn      1.878
_exptl_crystal_density_meas        .
_exptl_crystal_density_method      ?
_exptl_crystal_description         block
_exptl_crystal_F_000               3120
_exptl_crystal_size_max            ?
_exptl_crystal_size_mid            ?
_exptl_crystal_size_min            ?
_exptl_transmission_factor_max     ?
_exptl_transmission_factor_min     ?
_diffrn_reflns_av_R_equivalents    0.0291
_diffrn_reflns_av_unetI/netI       0.0263
_diffrn_reflns_Laue_measured_fraction_full  0.999
_diffrn_reflns_Laue_measured_fraction_max  0.995
_diffrn_reflns_limit_h_max         36
_diffrn_reflns_limit_h_min         -37
_diffrn_reflns_limit_k_max         7
_diffrn_reflns_limit_k_min         -9
_diffrn_reflns_limit_l_max         36
_diffrn_reflns_limit_l_min         -35
_diffrn_reflns_number              73429
_diffrn_reflns_point_group_measured_fraction_full  1.000
_diffrn_reflns_point_group_measured_fraction_max  0.995
_diffrn_reflns_theta_full          25.242
_diffrn_reflns_theta_max           28.203
_diffrn_reflns_theta_min           0.721
_diffrn_ambient_temperature        150.0
_diffrn_detector_area_resol_mean   ?
_diffrn_measured_fraction_theta_full  0.999
_diffrn_measured_fraction_theta_max  0.995
_diffrn_measurement_device_type    'Bruker APEX-II CCD'
_diffrn_measurement_method         '\f and \w scans'
_diffrn_radiation_type             MoK\a
_diffrn_radiation_wavelength       0.71073
_diffrn_source                     ?
_reflns_Friedel_coverage           0.960
_reflns_Friedel_fraction_full      1.000
_reflns_Friedel_fraction_max       0.995
_reflns_number_gt                  12163
_reflns_number_total               13261
_reflns_special_details
;
 Reflections were merged by SHELXL according to the crystal
 class for the calculation of statistics and refinement.
 
 _reflns_Friedel_fraction is defined as the number of unique
 Friedel pairs measured divided by the number that would be
 possible theoretically, ignoring centric projections and
 systematic absences. Completness statistics refer to single and
 composite reflections containing twin component 1 only.
;
_reflns_threshold_expression       'I > 2\s(I)'
_computing_cell_refinement         ?
_computing_data_collection         ?
_computing_data_reduction          ?
_computing_molecular_graphics      'Olex2 1.3 (Dolomanov et al., 2009)'
_computing_publication_material    'Olex2 1.3 (Dolomanov et al., 2009)'
_computing_structure_refinement    'SHELXL 2018/3 (Sheldrick, 2015)'
_computing_structure_solution      'SHELXT 2018/2 (Sheldrick, 2018)'
_refine_diff_density_max           1.005
_refine_diff_density_min           -0.545
_refine_diff_density_rms           0.081
_refine_ls_abs_structure_details
;
 Flack x determined using 5288 quotients [(I+)-(I-)]/[(I+)+(I-)]
 (Parsons, Flack and Wagner, Acta Cryst. B69 (2013) 249-259).
;
_refine_ls_abs_structure_Flack     -0.018(5)
_refine_ls_extinction_coef         .
_refine_ls_extinction_method       none
_refine_ls_goodness_of_fit_ref     1.052
_refine_ls_hydrogen_treatment      constr
_refine_ls_matrix_type             full
_refine_ls_number_parameters       725
_refine_ls_number_reflns           13261
_refine_ls_number_restraints       1
_refine_ls_R_factor_all            0.0300
_refine_ls_R_factor_gt             0.0245
_refine_ls_restrained_S_all        1.052
_refine_ls_shift/su_max            0.002
_refine_ls_shift/su_mean           0.000
_refine_ls_structure_factor_coef   Fsqd
_refine_ls_weighting_details      
 'w=1/[\s^2^(Fo^2^)+(0.0194P)^2^+2.9445P] where P=(Fo^2^+2Fc^2^)/3'
_refine_ls_weighting_scheme        calc
_refine_ls_wR_factor_gt            0.0494
_refine_ls_wR_factor_ref           0.0518
_refine_special_details
;
 Refined as a 2-component perfect twin.
;
_olex2_refinement_description
;
1. Fixed Uiso
 At 1.2 times of:
  All C(H) groups
 At 1.5 times of:
  All C(H,H,H) groups
2.a Ternary CH refined with riding coordinates:
 C01U(H01U), C020(H020)
2.b Aromatic/amide H refined with riding coordinates:
 C00X(H00X), C00Y(H00Y), C00Z(H00Z), C015(H015), C016(H016), C017(H017),
 C019(H019), C01A(H01A), C01B(H01B), C01C(H01C), C01D(H01D), C01E(H01E),
 C01F(H01F), C01G(H01G), C01H(H01H), C01I(H01I), C01J(H01J), C01K(H01K),
 C01M(H01M), C01N(H01N), C01O(H01O), C01P(H01P), C01R(H01R), C01W(H01W),
 C01Y(H01Y), C01Z(H01Z), C021(H021), C022(H022), C023(H023), C024(H024),
 C025(H025), C026(H026)
2.c Idealised Me refined as rotating group:
 C01T(H01l,H01q,H01s), C01X(H01t,H01v,H01x), C027(H02a,H02b,H02c), C028(H02d,
 H02e,H02f)
;
_atom_sites_solution_hydrogens     geom
_atom_sites_solution_primary       dual
_atom_sites_solution_secondary     ?
loop_
  _atom_site_label
  _atom_site_type_symbol
  _atom_site_fract_x
  _atom_site_fract_y
  _atom_site_fract_z
  _atom_site_U_iso_or_equiv
  _atom_site_adp_type
  _atom_site_occupancy
  _atom_site_site_symmetry_order
  _atom_site_calc_flag
  _atom_site_refinement_flags_posn
  _atom_site_refinement_flags_adp
  _atom_site_refinement_flags_occupancy
  _atom_site_disorder_assembly
  _atom_site_disorder_group
 Ag01 Ag 0.31625(2) 0.44661(5) 0.57649(2) 0.02946(7) Uani 1 1 d . . . . .
 Ag02 Ag 0.36650(2) 0.93623(5) 0.62217(2) 0.03066(8) Uani 1 1 d . . . . .
 Ag03 Ag 0.42810(2) 0.01803(5) 0.53134(2) 0.03260(8) Uani 1 1 d . . . . .
 Ag04 Ag 0.39091(2) 0.51419(5) 0.50032(2) 0.03270(8) Uani 1 1 d . . . . .
 S005 S 0.39515(3) 0.65876(13) 0.57886(4) 0.0250(2) Uani 1 1 d . . . . .
 S006 S 0.35198(3) 0.15893(14) 0.54429(4) 0.0248(2) Uani 1 1 d . . . . .
 P007 P 0.16330(4) 0.56863(18) 0.37986(4) 0.0294(3) Uani 1 1 d . . . . .
 P008 P 0.41715(4) -0.03804(17) 0.23859(4) 0.0293(2) Uani 1 1 d . . . . .
 F009 F 0.19244(10) 0.7147(4) 0.34787(10) 0.0438(7) Uani 1 1 d . . . . .
 F00A F 0.45929(10) -0.0425(4) 0.20011(11) 0.0440(7) Uani 1 1 d . . . . .
 F00B F 0.12143(10) 0.5692(4) 0.34120(11) 0.0467(7) Uani 1 1 d . . . . .
 F00C F 0.20540(9) 0.5682(4) 0.41877(10) 0.0431(7) Uani 1 1 d . . . . .
 O00D O 0.27458(10) 0.1032(4) 0.49716(12) 0.0341(7) Uani 1 1 d . . . . .
 F00E F 0.39946(9) 0.1562(4) 0.21686(12) 0.0504(8) Uani 1 1 d . . . . .
 F00F F 0.43490(12) -0.2321(4) 0.25999(10) 0.0551(8) Uani 1 1 d . . . . .
 F00G F 0.13894(10) 0.7392(5) 0.40795(11) 0.0522(8) Uani 1 1 d . . . . .
 F00H F 0.45038(10) 0.0703(4) 0.27574(12) 0.0517(8) Uani 1 1 d . . . . .
 O00I O 0.44437(11) 0.5750(4) 0.65440(11) 0.0309(7) Uani 1 1 d . . . . .
 F00J F 0.38388(10) -0.1445(5) 0.20069(11) 0.0575(9) Uani 1 1 d . . . . .
 F00K F 0.37504(11) -0.0333(4) 0.27687(12) 0.0482(8) Uani 1 1 d . . . . .
 N00L N 0.38142(12) 1.0252(5) 0.70055(13) 0.0252(8) Uani 1 1 d . . . . .
 F00M F 0.18846(10) 0.4020(4) 0.35165(11) 0.0479(8) Uani 1 1 d . . . . .
 N00N N 0.36673(12) 0.4779(5) 0.42259(14) 0.0260(8) Uani 1 1 d . . . . .
 N00O N 0.29176(12) 0.5298(5) 0.65449(13) 0.0239(7) Uani 1 1 d . . . . .
 O00P O 0.32871(11) -0.1235(5) 0.48783(13) 0.0422(9) Uani 1 1 d . . . . .
 N00Q N 0.45669(12) -0.1125(5) 0.45964(13) 0.0259(7) Uani 1 1 d . . . . .
 N00R N 0.45347(11) 0.3855(5) 0.45675(13) 0.0244(7) Uani 1 1 d . . . . .
 F00S F 0.13434(11) 0.4262(5) 0.41270(13) 0.0612(10) Uani 1 1 d . . . . .
 O00T O 0.45308(11) 0.3733(5) 0.59280(12) 0.0406(8) Uani 1 1 d . . . . .
 N00U N 0.29492(12) 1.0336(5) 0.65794(13) 0.0239(7) Uani 1 1 d . . . . .
 N00V N 0.23914(11) 0.5520(5) 0.57295(13) 0.0242(7) Uani 1 1 d . . . . .
 C00W C 0.50273(14) -0.1608(5) 0.45929(15) 0.0248(8) Uani 1 1 d . . . . .
 C00X C 0.42414(16) 1.0067(6) 0.72149(18) 0.0311(10) Uani 1 1 d . . . . .
 H00X H 0.450459 0.976527 0.701567 0.037 Uiso 1 1 calc R U . . .
 C00Y C 0.26078(16) 0.6622(6) 0.74282(15) 0.0310(10) Uani 1 1 d . . . . .
 H00Y H 0.250096 0.707103 0.773232 0.037 Uiso 1 1 calc R U . . .
 C00Z C 0.25707(14) 1.1502(6) 0.72892(16) 0.0287(9) Uani 1 1 d . . . . .
 H00Z H 0.259150 1.186686 0.761856 0.034 Uiso 1 1 calc R U . . .
 C010 C 0.44551(14) 0.3547(5) 0.40978(16) 0.0251(9) Uani 1 1 d . . . . .
 C011 C 0.39734(14) 0.4002(6) 0.39114(15) 0.0252(9) Uani 1 1 d . . . . .
 C012 C 0.34393(14) 1.0651(5) 0.72921(15) 0.0228(8) Uani 1 1 d . . . . .
 C013 C 0.52873(13) -0.1377(5) 0.50573(15) 0.0241(8) Uani 1 1 d . . . . .
 N014 N 0.50669(12) -0.0441(5) 0.54133(13) 0.0265(8) Uani 1 1 d . . . . .
 C015 C 0.43175(17) 1.0292(7) 0.77021(19) 0.0389(12) Uani 1 1 d . . . . .
 H015 H 0.462685 1.018698 0.783454 0.047 Uiso 1 1 calc R U . . .
 C016 C 0.23011(15) 0.6572(6) 0.70391(15) 0.0279(9) Uani 1 1 d . . . . .
 H016 H 0.198251 0.697952 0.707189 0.033 Uiso 1 1 calc R U . . .
 C017 C 0.49769(17) -0.2443(6) 0.37568(16) 0.0358(11) Uani 1 1 d . . . . .
 H017 H 0.511793 -0.291287 0.346983 0.043 Uiso 1 1 calc R U . . .
 C018 C 0.31638(14) 0.0229(6) 0.50491(17) 0.0269(9) Uani 1 1 d . . . . .
 C019 C 0.45076(17) -0.1916(6) 0.37604(16) 0.0350(11) Uani 1 1 d . . . . .
 H019 H 0.432138 -0.199256 0.347502 0.042 Uiso 1 1 calc R U . . .
 C01A C 0.52383(16) -0.2282(6) 0.41732(16) 0.0311(10) Uani 1 1 d . . . . .
 H01A H 0.556304 -0.262956 0.417484 0.037 Uiso 1 1 calc R U . . .
 C01B C 0.21443(15) 1.1625(6) 0.70444(18) 0.0343(11) Uani 1 1 d . . . . .
 H01B H 0.186714 1.204940 0.720512 0.041 Uiso 1 1 calc R U . . .
 C01C C 0.48136(14) 0.2878(6) 0.37969(17) 0.0292(9) Uani 1 1 d . . . . .
 H01C H 0.475043 0.263066 0.346582 0.035 Uiso 1 1 calc R U . . .
 C01D C 0.32092(16) 0.5377(6) 0.69288(16) 0.0286(9) Uani 1 1 d . . . . .
 H01D H 0.352711 0.496851 0.689026 0.034 Uiso 1 1 calc R U . . .
 C01E C 0.21408(15) 0.5556(6) 0.53180(17) 0.0306(9) Uani 1 1 d . . . . .
 H01E H 0.229788 0.527633 0.502312 0.037 Uiso 1 1 calc R U . . .
 C01F C 0.49668(14) 0.3536(6) 0.47465(16) 0.0288(9) Uani 1 1 d . . . . .
 H01F H 0.501815 0.374808 0.508139 0.035 Uiso 1 1 calc R U . . .
 C01G C 0.30685(17) 0.6022(6) 0.73752(16) 0.0326(10) Uani 1 1 d . . . . .
 H01G H 0.328336 0.605236 0.763940 0.039 Uiso 1 1 calc R U . . .
 C01H C 0.34915(16) 1.0857(7) 0.77871(17) 0.0352(11) Uani 1 1 d . . . . .
 H01H H 0.322349 1.112356 0.798310 0.042 Uiso 1 1 calc R U . . .
 C01I C 0.21278(15) 1.1120(6) 0.65633(18) 0.0340(10) Uani 1 1 d . . . . .
 H01I H 0.183953 1.119556 0.638709 0.041 Uiso 1 1 calc R U . . .
 C01J C 0.43144(17) -0.1277(6) 0.41847(16) 0.0324(10) Uani 1 1 d . . . . .
 H01J H 0.398971 -0.092837 0.418822 0.039 Uiso 1 1 calc R U . . .
 C01K C 0.38449(18) 0.3718(8) 0.34330(19) 0.0508(15) Uani 1 1 d . . . . .
 H01K H 0.406088 0.316227 0.321259 0.061 Uiso 1 1 calc R U . . .
 C01L C 0.29702(14) 1.0836(5) 0.70465(16) 0.0239(9) Uani 1 1 d . . . . .
 C01M C 0.25342(15) 1.0509(6) 0.63444(17) 0.0309(10) Uani 1 1 d . . . . .
 H01M H 0.252264 1.019322 0.601113 0.037 Uiso 1 1 calc R U . . .
 C01N C 0.53439(15) 0.2912(6) 0.44702(17) 0.0324(10) Uani 1 1 d . . . . .
 H01N H 0.564792 0.272086 0.460882 0.039 Uiso 1 1 calc R U . . .
 C01O C 0.30940(18) 0.5049(8) 0.35966(19) 0.0432(13) Uani 1 1 d . . . . .
 H01O H 0.278797 0.543746 0.349512 0.052 Uiso 1 1 calc R U . . .
 C01P C 0.52618(15) 0.2577(6) 0.39841(17) 0.0333(10) Uani 1 1 d . . . . .
 H01P H 0.551048 0.214509 0.378162 0.040 Uiso 1 1 calc R U . . .
 C01Q C 0.43573(14) 0.5122(6) 0.60981(16) 0.0254(9) Uani 1 1 d . . . . .
 C01R C 0.32379(15) 0.5283(7) 0.40702(17) 0.0310(10) Uani 1 1 d . . . . .
 H01R H 0.302291 0.582399 0.429398 0.037 Uiso 1 1 calc R U . . .
 C01S C 0.21727(14) 0.5898(5) 0.61497(14) 0.0219(8) Uani 1 1 d . . . . .
 C01T C 0.2566(2) 0.0552(8) 0.4122(2) 0.0582(17) Uani 1 1 d . . . . .
 H01L H 0.253861 0.190403 0.407917 0.087 Uiso 1 1 calc R U . . .
 H01Q H 0.235529 -0.008044 0.389287 0.087 Uiso 1 1 calc R U . . .
 H01S H 0.289368 0.016639 0.406261 0.087 Uiso 1 1 calc R U . . .
 C01U C 0.47976(17) 0.4695(6) 0.68275(17) 0.0328(10) Uani 1 1 d . . . . .
 H01U H 0.474942 0.332865 0.677548 0.039 Uiso 1 1 calc R U . . .
 C01V C 0.24704(15) 0.5905(5) 0.65941(15) 0.0239(9) Uani 1 1 d . . . . .
 C01W C 0.16658(16) 0.5982(7) 0.53046(18) 0.0352(10) Uani 1 1 d . . . . .
 H01W H 0.149923 0.602038 0.500637 0.042 Uiso 1 1 calc R U . . .
 C01X C 0.52885(18) 0.5241(8) 0.6659(2) 0.0534(16) Uani 1 1 d . . . . .
 H01T H 0.532154 0.495950 0.631445 0.080 Uiso 1 1 calc R U . . .
 H01V H 0.552573 0.453787 0.684286 0.080 Uiso 1 1 calc R U . . .
 H01X H 0.533602 0.657822 0.671207 0.080 Uiso 1 1 calc R U . . .
 C01Y C 0.16892(15) 0.6295(7) 0.61609(17) 0.0336(10) Uani 1 1 d . . . . .
 H01Y H 0.153438 0.652556 0.645991 0.040 Uiso 1 1 calc R U . . .
 C01Z C 0.39326(18) 1.0676(8) 0.79944(19) 0.0437(12) Uani 1 1 d . . . . .
 H01Z H 0.397182 1.081218 0.833357 0.052 Uiso 1 1 calc R U . . .
 C020 C 0.24273(16) 0.0043(7) 0.4629(2) 0.0406(12) Uani 1 1 d . . . . .
 H020 H 0.245951 -0.133360 0.467450 0.049 Uiso 1 1 calc R U . . .
 C021 C 0.52922(16) -0.0149(6) 0.58314(16) 0.0325(10) Uani 1 1 d . . . . .
 H021 H 0.513363 0.052520 0.607872 0.039 Uiso 1 1 calc R U . . .
 C022 C 0.57433(15) -0.2067(7) 0.51242(17) 0.0367(11) Uani 1 1 d . . . . .
 H022 H 0.589771 -0.273209 0.487251 0.044 Uiso 1 1 calc R U . . .
 C023 C 0.57455(16) -0.0786(7) 0.59189(17) 0.0358(11) Uani 1 1 d . . . . .
 H023 H 0.589889 -0.054676 0.621815 0.043 Uiso 1 1 calc R U . . .
 C024 C 0.14379(15) 0.6351(7) 0.57337(19) 0.0383(11) Uani 1 1 d . . . . .
 H024 H 0.110956 0.664285 0.573558 0.046 Uiso 1 1 calc R U . . .
 C025 C 0.59681(16) -0.1776(7) 0.55595(18) 0.0413(12) Uani 1 1 d . . . . .
 H025 H 0.627727 -0.226023 0.561135 0.050 Uiso 1 1 calc R U . . .
 C026 C 0.3399(2) 0.4254(10) 0.3281(2) 0.0612(18) Uani 1 1 d . . . . .
 H026 H 0.330638 0.406294 0.295492 0.073 Uiso 1 1 calc R U . . .
 C027 C 0.19339(18) 0.0652(8) 0.4773(3) 0.065(2) Uani 1 1 d . . . . .
 H02A H 0.187921 0.034145 0.511380 0.097 Uiso 1 1 calc R U . . .
 H02B H 0.169985 0.000890 0.457191 0.097 Uiso 1 1 calc R U . . .
 H02C H 0.190307 0.200170 0.472835 0.097 Uiso 1 1 calc R U . . .
 C028 C 0.4701(3) 0.5167(8) 0.7349(2) 0.0610(18) Uani 1 1 d . . . . .
 H02D H 0.474520 0.650795 0.739857 0.092 Uiso 1 1 calc R U . . .
 H02E H 0.492097 0.447659 0.755625 0.092 Uiso 1 1 calc R U . . .
 H02F H 0.437474 0.482386 0.742995 0.092 Uiso 1 1 calc R U . . .

loop_
  _atom_site_aniso_label
  _atom_site_aniso_U_11
  _atom_site_aniso_U_22
  _atom_site_aniso_U_33
  _atom_site_aniso_U_23
  _atom_site_aniso_U_13
  _atom_site_aniso_U_12
 Ag01 0.02770(15) 0.03694(17) 0.02373(16) -0.00431(15) 0.00340(14) 0.00957(13)
 Ag02 0.02847(16) 0.03675(18) 0.02675(16) -0.00832(16) 0.00273(14) 0.00452(14)
 Ag03 0.02295(15) 0.04307(19) 0.03177(18) -0.00751(17) 0.00389(14) 0.00339(14)
 Ag04 0.03071(17) 0.0479(2) 0.01952(15) -0.00259(16) 0.00286(14) 0.00782(15)
 S005 0.0297(5) 0.0199(5) 0.0254(5) -0.0036(4) -0.0032(4) 0.0033(4)
 S006 0.0251(5) 0.0211(5) 0.0283(5) -0.0027(4) -0.0010(4) 0.0041(4)
 P007 0.0223(5) 0.0434(7) 0.0226(6) -0.0036(5) -0.0010(4) -0.0027(5)
 P008 0.0263(5) 0.0366(6) 0.0251(6) -0.0043(5) -0.0032(5) 0.0014(5)
 F009 0.0478(16) 0.0492(17) 0.0342(15) 0.0016(14) 0.0051(13) -0.0100(14)
 F00A 0.0298(14) 0.065(2) 0.0371(16) -0.0035(14) 0.0052(12) 0.0056(13)
 F00B 0.0301(14) 0.070(2) 0.0402(17) -0.0118(15) -0.0124(13) 0.0039(14)
 F00C 0.0303(14) 0.072(2) 0.0267(14) -0.0016(14) -0.0080(12) -0.0044(13)
 O00D 0.0259(15) 0.0265(15) 0.050(2) -0.0089(15) -0.0095(15) 0.0049(12)
 F00E 0.0316(14) 0.0539(19) 0.066(2) 0.0187(17) 0.0059(14) 0.0105(13)
 F00F 0.087(2) 0.0424(17) 0.0364(16) 0.0018(14) 0.0048(15) 0.0237(16)
 F00G 0.0378(15) 0.069(2) 0.0493(18) -0.0255(17) 0.0032(13) 0.0060(15)
 F00H 0.0402(16) 0.063(2) 0.0515(19) -0.0290(16) -0.0118(14) 0.0069(15)
 O00I 0.0381(17) 0.0264(15) 0.0281(16) -0.0050(13) -0.0088(14) 0.0114(13)
 F00J 0.0445(17) 0.082(2) 0.0457(18) -0.0177(17) -0.0068(14) -0.0193(17)
 F00K 0.0458(17) 0.0563(19) 0.0426(18) -0.0005(15) 0.0165(14) 0.0005(14)
 N00L 0.0248(18) 0.0247(18) 0.0260(19) -0.0055(15) 0.0019(15) -0.0006(14)
 F00M 0.0443(16) 0.0456(17) 0.0539(19) -0.0175(15) -0.0104(14) 0.0087(14)
 N00N 0.0222(18) 0.0296(19) 0.0261(19) -0.0021(15) 0.0012(15) -0.0005(14)
 N00O 0.0267(17) 0.0250(17) 0.0201(17) -0.0003(14) 0.0011(14) 0.0010(14)
 O00P 0.0377(18) 0.0344(18) 0.055(2) -0.0209(16) -0.0139(15) 0.0118(14)
 N00Q 0.0307(19) 0.0221(17) 0.0249(19) 0.0006(15) 0.0009(15) -0.0017(14)
 N00R 0.0242(17) 0.0208(17) 0.0282(19) -0.0013(15) 0.0041(15) -0.0010(14)
 F00S 0.0495(19) 0.081(2) 0.054(2) 0.0205(18) -0.0001(15) -0.0279(17)
 O00T 0.048(2) 0.0375(18) 0.0358(18) -0.0121(15) -0.0080(15) 0.0171(16)
 N00U 0.0239(17) 0.0228(17) 0.0251(18) 0.0005(14) 0.0012(14) 0.0013(14)
 N00V 0.0279(17) 0.0263(16) 0.0185(16) 0.0000(15) 0.0033(15) 0.0044(13)
 C00W 0.031(2) 0.0181(19) 0.025(2) 0.0020(17) 0.0062(18) -0.0048(16)
 C00X 0.021(2) 0.035(2) 0.036(3) -0.004(2) 0.0003(19) 0.0046(18)
 C00Y 0.051(3) 0.027(2) 0.015(2) -0.0021(17) 0.0061(19) -0.003(2)
 C00Z 0.023(2) 0.027(2) 0.036(3) -0.0037(19) 0.0075(18) -0.0003(17)
 C010 0.027(2) 0.0160(19) 0.033(2) -0.0030(17) 0.0040(18) -0.0009(16)
 C011 0.025(2) 0.021(2) 0.029(2) -0.0042(17) 0.0046(17) -0.0030(16)
 C012 0.026(2) 0.0145(17) 0.028(2) -0.0010(16) 0.0005(17) -0.0011(15)
 C013 0.0261(19) 0.0231(19) 0.023(2) 0.0024(17) 0.0068(17) -0.0012(16)
 N014 0.0263(18) 0.0303(19) 0.0227(19) -0.0021(15) 0.0046(15) 0.0006(14)
 C015 0.032(2) 0.045(3) 0.039(3) -0.008(2) -0.011(2) 0.003(2)
 C016 0.033(2) 0.026(2) 0.024(2) -0.0019(18) 0.0069(18) -0.0023(17)
 C017 0.057(3) 0.025(2) 0.025(2) -0.0018(19) 0.011(2) -0.009(2)
 C018 0.028(2) 0.026(2) 0.027(2) 0.0002(18) -0.0009(19) 0.0005(16)
 C019 0.056(3) 0.028(2) 0.021(2) 0.0009(19) -0.001(2) -0.014(2)
 C01A 0.040(3) 0.023(2) 0.031(2) -0.0014(19) 0.009(2) -0.0027(18)
 C01B 0.021(2) 0.030(2) 0.051(3) -0.002(2) 0.006(2) 0.0000(18)
 C01C 0.031(2) 0.023(2) 0.033(2) -0.0071(18) 0.0059(19) -0.0027(17)
 C01D 0.033(2) 0.026(2) 0.027(2) 0.0003(18) -0.0010(18) -0.0015(18)
 C01E 0.034(2) 0.036(2) 0.022(2) 0.001(2) 0.0016(19) 0.0049(18)
 C01F 0.028(2) 0.024(2) 0.035(2) 0.0051(19) 0.0004(18) -0.0010(17)
 C01G 0.044(3) 0.031(2) 0.023(2) 0.0024(19) -0.006(2) -0.007(2)
 C01H 0.031(2) 0.044(3) 0.031(2) -0.007(2) 0.002(2) 0.005(2)
 C01I 0.023(2) 0.030(2) 0.050(3) 0.005(2) -0.006(2) 0.0011(18)
 C01J 0.041(3) 0.025(2) 0.031(2) 0.0039(19) -0.004(2) -0.0057(19)
 C01K 0.039(3) 0.077(4) 0.036(3) -0.032(3) -0.002(2) 0.013(3)
 C01L 0.024(2) 0.0183(19) 0.029(2) 0.0011(17) 0.0022(17) 0.0007(15)
 C01M 0.029(2) 0.027(2) 0.037(3) 0.0031(19) -0.0020(19) -0.0039(18)
 C01N 0.024(2) 0.024(2) 0.049(3) 0.002(2) 0.000(2) 0.0003(17)
 C01O 0.027(2) 0.066(4) 0.037(3) -0.010(3) -0.006(2) 0.005(2)
 C01P 0.026(2) 0.026(2) 0.048(3) -0.005(2) 0.015(2) -0.0002(18)
 C01Q 0.025(2) 0.023(2) 0.029(2) -0.0008(17) -0.0008(17) -0.0011(16)
 C01R 0.023(2) 0.041(3) 0.029(2) -0.001(2) 0.0045(18) 0.0003(18)
 C01S 0.028(2) 0.0165(18) 0.021(2) -0.0004(15) 0.0025(16) 0.0025(15)
 C01T 0.078(4) 0.048(3) 0.048(3) 0.002(3) -0.031(3) -0.015(3)
 C01U 0.041(3) 0.025(2) 0.032(2) 0.0047(19) -0.012(2) 0.0048(19)
 C01V 0.032(2) 0.0189(19) 0.021(2) -0.0009(16) 0.0038(17) -0.0028(16)
 C01W 0.035(2) 0.040(2) 0.031(2) -0.001(2) -0.007(2) 0.0031(19)
 C01X 0.037(3) 0.054(3) 0.069(4) 0.024(3) -0.020(3) -0.007(2)
 C01Y 0.029(2) 0.041(3) 0.031(3) -0.010(2) 0.0060(19) 0.0025(19)
 C01Z 0.046(3) 0.056(3) 0.029(3) -0.007(2) -0.008(2) 0.005(2)
 C020 0.031(2) 0.028(2) 0.063(4) -0.010(2) -0.021(2) -0.0013(19)
 C021 0.031(2) 0.041(3) 0.025(2) -0.002(2) 0.0040(18) 0.0008(18)
 C022 0.029(2) 0.040(3) 0.041(3) -0.007(2) 0.008(2) 0.0074(19)
 C023 0.036(2) 0.044(3) 0.027(2) 0.000(2) -0.0037(19) 0.001(2)
 C024 0.026(2) 0.048(3) 0.042(3) -0.008(3) -0.004(2) 0.0066(19)
 C025 0.031(2) 0.047(3) 0.046(3) -0.001(2) -0.006(2) 0.010(2)
 C026 0.047(3) 0.100(5) 0.036(3) -0.027(3) -0.013(3) 0.009(3)
 C027 0.033(3) 0.047(3) 0.115(6) -0.022(4) -0.023(3) 0.005(2)
 C028 0.096(5) 0.054(4) 0.033(3) 0.001(3) -0.018(3) 0.027(3)

_geom_special_details
;
 All esds (except the esd in the dihedral angle between two l.s. planes)
 are estimated using the full covariance matrix.  The cell esds are taken
 into account individually in the estimation of esds in distances, angles
 and torsion angles; correlations between esds in cell parameters are only
 used when they are defined by crystal symmetry.  An approximate (isotropic)
 treatment of cell esds is used for estimating esds involving l.s. planes.
;
loop_
  _geom_bond_atom_site_label_1
  _geom_bond_atom_site_label_2
  _geom_bond_distance
  _geom_bond_site_symmetry_2
  _geom_bond_publ_flag
 Ag01 Ag04 3.0194(5) . ?
 Ag01 S005 2.6982(10) . ?
 Ag01 S006 2.4642(10) . ?
 Ag01 N00O 2.343(4) . ?
 Ag01 N00V 2.306(3) . ?
 Ag02 Ag03 3.1118(5) 1_565 ?
 Ag02 S005 2.4604(10) . ?
 Ag02 S006 2.7139(11) 1_565 ?
 Ag02 N00L 2.300(4) . ?
 Ag02 N00U 2.356(3) . ?
 Ag03 S006 2.4012(10) . ?
 Ag03 N00Q 2.337(4) . ?
 Ag03 N014 2.279(3) . ?
 Ag04 S005 2.4108(11) . ?
 Ag04 N00N 2.271(4) . ?
 Ag04 N00R 2.329(3) . ?
 S005 C01Q 1.775(4) . ?
 S006 C018 1.775(4) . ?
 P007 F009 1.600(3) . ?
 P007 F00B 1.594(3) . ?
 P007 F00C 1.603(3) . ?
 P007 F00G 1.605(3) . ?
 P007 F00M 1.595(3) . ?
 P007 F00S 1.593(3) . ?
 P008 F00A 1.597(3) . ?
 P008 F00E 1.598(3) . ?
 P008 F00F 1.594(3) . ?
 P008 F00H 1.594(3) . ?
 P008 F00J 1.601(3) . ?
 P008 F00K 1.592(3) . ?
 O00D C018 1.330(5) . ?
 O00D C020 1.487(5) . ?
 O00I C01Q 1.336(5) . ?
 O00I C01U 1.479(5) . ?
 N00L C00X 1.344(6) . ?
 N00L C012 1.353(5) . ?
 N00N C011 1.347(5) . ?
 N00N C01R 1.336(6) . ?
 N00O C01D 1.345(5) . ?
 N00O C01V 1.342(5) . ?
 O00P C018 1.203(5) . ?
 N00Q C00W 1.345(5) . ?
 N00Q C01J 1.348(5) . ?
 N00R C010 1.337(5) . ?
 N00R C01F 1.336(5) . ?
 O00T C01Q 1.206(5) . ?
 N00U C01L 1.343(5) . ?
 N00U C01M 1.345(5) . ?
 N00V C01E 1.341(6) . ?
 N00V C01S 1.344(5) . ?
 C00W C013 1.489(6) . ?
 C00W C01A 1.392(6) . ?
 C00X H00X 0.9500 . ?
 C00X C015 1.374(7) . ?
 C00Y H00Y 0.9500 . ?
 C00Y C016 1.382(6) . ?
 C00Y C01G 1.377(6) . ?
 C00Z H00Z 0.9500 . ?
 C00Z C01B 1.384(6) . ?
 C00Z C01L 1.397(6) . ?
 C010 C011 1.490(6) . ?
 C010 C01C 1.396(6) . ?
 C011 C01K 1.387(6) . ?
 C012 C01H 1.385(6) . ?
 C012 C01L 1.494(6) . ?
 C013 N014 1.345(5) . ?
 C013 C022 1.392(5) . ?
 N014 C021 1.336(6) . ?
 C015 H015 0.9500 . ?
 C015 C01Z 1.382(7) . ?
 C016 H016 0.9500 . ?
 C016 C01V 1.405(6) . ?
 C017 H017 0.9500 . ?
 C017 C019 1.378(7) . ?
 C017 C01A 1.373(6) . ?
 C019 H019 0.9500 . ?
 C019 C01J 1.373(6) . ?
 C01A H01A 0.9500 . ?
 C01B H01B 0.9500 . ?
 C01B C01I 1.380(7) . ?
 C01C H01C 0.9500 . ?
 C01C C01P 1.384(6) . ?
 C01D H01D 0.9500 . ?
 C01D C01G 1.378(6) . ?
 C01E H01E 0.9500 . ?
 C01E C01W 1.375(6) . ?
 C01F H01F 0.9500 . ?
 C01F C01N 1.385(6) . ?
 C01G H01G 0.9500 . ?
 C01H H01H 0.9500 . ?
 C01H C01Z 1.377(7) . ?
 C01I H01I 0.9500 . ?
 C01I C01M 1.369(6) . ?
 C01J H01J 0.9500 . ?
 C01K H01K 0.9500 . ?
 C01K C026 1.382(7) . ?
 C01M H01M 0.9500 . ?
 C01N H01N 0.9500 . ?
 C01N C01P 1.386(6) . ?
 C01O H01O 0.9500 . ?
 C01O C01R 1.382(7) . ?
 C01O C026 1.352(7) . ?
 C01P H01P 0.9500 . ?
 C01R H01R 0.9500 . ?
 C01S C01V 1.489(6) . ?
 C01S C01Y 1.395(6) . ?
 C01T H01L 0.9800 . ?
 C01T H01Q 0.9800 . ?
 C01T H01S 0.9800 . ?
 C01T C020 1.501(8) . ?
 C01U H01U 1.0000 . ?
 C01U C01X 1.513(7) . ?
 C01U C028 1.506(7) . ?
 C01W H01W 0.9500 . ?
 C01W C024 1.376(7) . ?
 C01X H01T 0.9800 . ?
 C01X H01V 0.9800 . ?
 C01X H01X 0.9800 . ?
 C01Y H01Y 0.9500 . ?
 C01Y C024 1.379(6) . ?
 C01Z H01Z 0.9500 . ?
 C020 H020 1.0000 . ?
 C020 C027 1.514(7) . ?
 C021 H021 0.9500 . ?
 C021 C023 1.380(6) . ?
 C022 H022 0.9500 . ?
 C022 C025 1.377(6) . ?
 C023 H023 0.9500 . ?
 C023 C025 1.374(6) . ?
 C024 H024 0.9500 . ?
 C025 H025 0.9500 . ?
 C026 H026 0.9500 . ?
 C027 H02A 0.9800 . ?
 C027 H02B 0.9800 . ?
 C027 H02C 0.9800 . ?
 C028 H02D 0.9800 . ?
 C028 H02E 0.9800 . ?
 C028 H02F 0.9800 . ?

loop_
  _geom_angle_atom_site_label_1
  _geom_angle_atom_site_label_2
  _geom_angle_atom_site_label_3
  _geom_angle
  _geom_angle_site_symmetry_1
  _geom_angle_site_symmetry_3
  _geom_angle_publ_flag
 S005 Ag01 Ag04 49.49(2) . . ?
 S006 Ag01 Ag04 66.20(3) . . ?
 S006 Ag01 S005 98.26(3) . . ?
 N00O Ag01 Ag04 143.87(9) . . ?
 N00O Ag01 S005 94.44(9) . . ?
 N00O Ag01 S006 131.84(9) . . ?
 N00V Ag01 Ag04 125.19(9) . . ?
 N00V Ag01 S005 126.51(9) . . ?
 N00V Ag01 S006 130.21(9) . . ?
 N00V Ag01 N00O 71.17(12) . . ?
 S005 Ag02 Ag03 64.89(3) . 1_565 ?
 S005 Ag02 S006 98.01(3) . 1_565 ?
 S006 Ag02 Ag03 48.09(2) 1_565 1_565 ?
 N00L Ag02 Ag03 127.37(9) . 1_565 ?
 N00L Ag02 S005 128.59(9) . . ?
 N00L Ag02 S006 127.81(9) . 1_565 ?
 N00L Ag02 N00U 71.25(12) . . ?
 N00U Ag02 Ag03 139.69(8) . 1_565 ?
 N00U Ag02 S005 136.59(9) . . ?
 N00U Ag02 S006 91.69(9) . 1_565 ?
 S006 Ag03 Ag02 57.25(3) . 1_545 ?
 N00Q Ag03 Ag02 143.39(9) . 1_545 ?
 N00Q Ag03 S006 127.17(9) . . ?
 N014 Ag03 Ag02 114.13(9) . 1_545 ?
 N014 Ag03 S006 159.20(9) . . ?
 N014 Ag03 N00Q 71.86(12) . . ?
 S005 Ag04 Ag01 58.31(3) . . ?
 N00N Ag04 Ag01 115.64(9) . . ?
 N00N Ag04 S005 156.59(9) . . ?
 N00N Ag04 N00R 72.07(12) . . ?
 N00R Ag04 Ag01 145.76(9) . . ?
 N00R Ag04 S005 126.84(9) . . ?
 Ag02 S005 Ag01 101.37(4) . . ?
 Ag04 S005 Ag01 72.21(3) . . ?
 Ag04 S005 Ag02 140.43(5) . . ?
 C01Q S005 Ag01 102.12(14) . . ?
 C01Q S005 Ag02 117.17(15) . . ?
 C01Q S005 Ag04 102.23(14) . . ?
 Ag01 S006 Ag02 105.54(4) . 1_545 ?
 Ag03 S006 Ag01 140.61(5) . . ?
 Ag03 S006 Ag02 74.66(3) . 1_545 ?
 C018 S006 Ag01 116.80(14) . . ?
 C018 S006 Ag02 104.42(15) . 1_545 ?
 C018 S006 Ag03 100.57(14) . . ?
 F009 P007 F00C 89.53(15) . . ?
 F009 P007 F00G 89.34(17) . . ?
 F00B P007 F009 90.48(17) . . ?
 F00B P007 F00C 179.9(2) . . ?
 F00B P007 F00G 90.30(16) . . ?
 F00B P007 F00M 90.21(16) . . ?
 F00C P007 F00G 89.64(16) . . ?
 F00M P007 F009 89.53(17) . . ?
 F00M P007 F00C 89.85(16) . . ?
 F00M P007 F00G 178.77(19) . . ?
 F00S P007 F009 178.73(19) . . ?
 F00S P007 F00B 90.23(17) . . ?
 F00S P007 F00C 89.77(17) . . ?
 F00S P007 F00G 89.60(19) . . ?
 F00S P007 F00M 91.5(2) . . ?
 F00A P008 F00E 89.96(16) . . ?
 F00A P008 F00J 89.47(16) . . ?
 F00E P008 F00J 89.24(19) . . ?
 F00F P008 F00A 89.77(17) . . ?
 F00F P008 F00E 179.7(2) . . ?
 F00F P008 F00H 90.07(17) . . ?
 F00F P008 F00J 90.62(19) . . ?
 F00H P008 F00A 90.07(16) . . ?
 F00H P008 F00E 90.06(18) . . ?
 F00H P008 F00J 179.2(2) . . ?
 F00K P008 F00A 179.8(2) . . ?
 F00K P008 F00E 89.90(16) . . ?
 F00K P008 F00F 90.37(17) . . ?
 F00K P008 F00H 89.99(17) . . ?
 F00K P008 F00J 90.47(17) . . ?
 C018 O00D C020 115.6(3) . . ?
 C01Q O00I C01U 116.1(3) . . ?
 C00X N00L Ag02 122.9(3) . . ?
 C00X N00L C012 118.0(4) . . ?
 C012 N00L Ag02 117.9(3) . . ?
 C011 N00N Ag04 117.8(3) . . ?
 C01R N00N Ag04 123.2(3) . . ?
 C01R N00N C011 119.0(4) . . ?
 C01D N00O Ag01 123.9(3) . . ?
 C01V N00O Ag01 117.0(3) . . ?
 C01V N00O C01D 118.8(4) . . ?
 C00W N00Q Ag03 116.3(3) . . ?
 C00W N00Q C01J 118.9(4) . . ?
 C01J N00Q Ag03 124.5(3) . . ?
 C010 N00R Ag04 116.2(3) . . ?
 C01F N00R Ag04 124.6(3) . . ?
 C01F N00R C010 119.0(4) . . ?
 C01L N00U Ag02 116.5(3) . . ?
 C01L N00U C01M 118.6(4) . . ?
 C01M N00U Ag02 124.8(3) . . ?
 C01E N00V Ag01 122.7(3) . . ?
 C01E N00V C01S 119.2(3) . . ?
 C01S N00V Ag01 117.6(3) . . ?
 N00Q C00W C013 116.2(4) . . ?
 N00Q C00W C01A 120.6(4) . . ?
 C01A C00W C013 123.2(4) . . ?
 N00L C00X H00X 118.3 . . ?
 N00L C00X C015 123.4(4) . . ?
 C015 C00X H00X 118.3 . . ?
 C016 C00Y H00Y 120.0 . . ?
 C01G C00Y H00Y 120.0 . . ?
 C01G C00Y C016 120.0(4) . . ?
 C01B C00Z H00Z 120.4 . . ?
 C01B C00Z C01L 119.3(4) . . ?
 C01L C00Z H00Z 120.4 . . ?
 N00R C010 C011 117.0(4) . . ?
 N00R C010 C01C 121.0(4) . . ?
 C01C C010 C011 122.0(4) . . ?
 N00N C011 C010 116.9(4) . . ?
 N00N C011 C01K 120.6(4) . . ?
 C01K C011 C010 122.5(4) . . ?
 N00L C012 C01H 121.3(4) . . ?
 N00L C012 C01L 116.4(4) . . ?
 C01H C012 C01L 122.3(4) . . ?
 N014 C013 C00W 117.4(3) . . ?
 N014 C013 C022 120.5(4) . . ?
 C022 C013 C00W 122.1(4) . . ?
 C013 N014 Ag03 117.3(3) . . ?
 C021 N014 Ag03 122.5(3) . . ?
 C021 N014 C013 119.5(4) . . ?
 C00X C015 H015 120.8 . . ?
 C00X C015 C01Z 118.3(4) . . ?
 C01Z C015 H015 120.8 . . ?
 C00Y C016 H016 120.7 . . ?
 C00Y C016 C01V 118.6(4) . . ?
 C01V C016 H016 120.7 . . ?
 C019 C017 H017 120.4 . . ?
 C01A C017 H017 120.4 . . ?
 C01A C017 C019 119.2(4) . . ?
 O00D C018 S006 111.3(3) . . ?
 O00P C018 S006 123.9(3) . . ?
 O00P C018 O00D 124.8(4) . . ?
 C017 C019 H019 120.7 . . ?
 C01J C019 C017 118.7(4) . . ?
 C01J C019 H019 120.7 . . ?
 C00W C01A H01A 120.0 . . ?
 C017 C01A C00W 120.0(4) . . ?
 C017 C01A H01A 120.0 . . ?
 C00Z C01B H01B 120.5 . . ?
 C01I C01B C00Z 119.0(4) . . ?
 C01I C01B H01B 120.5 . . ?
 C010 C01C H01C 120.2 . . ?
 C01P C01C C010 119.6(4) . . ?
 C01P C01C H01C 120.2 . . ?
 N00O C01D H01D 118.5 . . ?
 N00O C01D C01G 123.1(4) . . ?
 C01G C01D H01D 118.5 . . ?
 N00V C01E H01E 118.6 . . ?
 N00V C01E C01W 122.8(4) . . ?
 C01W C01E H01E 118.6 . . ?
 N00R C01F H01F 118.2 . . ?
 N00R C01F C01N 123.5(4) . . ?
 C01N C01F H01F 118.2 . . ?
 C00Y C01G H01G 120.9 . . ?
 C01D C01G C00Y 118.2(4) . . ?
 C01D C01G H01G 120.9 . . ?
 C012 C01H H01H 120.1 . . ?
 C01Z C01H C012 119.8(4) . . ?
 C01Z C01H H01H 120.1 . . ?
 C01B C01I H01I 120.6 . . ?
 C01M C01I C01B 118.8(4) . . ?
 C01M C01I H01I 120.6 . . ?
 N00Q C01J C019 122.7(4) . . ?
 N00Q C01J H01J 118.7 . . ?
 C019 C01J H01J 118.7 . . ?
 C011 C01K H01K 120.4 . . ?
 C026 C01K C011 119.2(5) . . ?
 C026 C01K H01K 120.4 . . ?
 N00U C01L C00Z 121.2(4) . . ?
 N00U C01L C012 117.0(4) . . ?
 C00Z C01L C012 121.8(4) . . ?
 N00U C01M C01I 123.0(4) . . ?
 N00U C01M H01M 118.5 . . ?
 C01I C01M H01M 118.5 . . ?
 C01F C01N H01N 121.2 . . ?
 C01F C01N C01P 117.6(4) . . ?
 C01P C01N H01N 121.2 . . ?
 C01R C01O H01O 120.8 . . ?
 C026 C01O H01O 120.8 . . ?
 C026 C01O C01R 118.4(5) . . ?
 C01C C01P C01N 119.3(4) . . ?
 C01C C01P H01P 120.4 . . ?
 C01N C01P H01P 120.4 . . ?
 O00I C01Q S005 111.3(3) . . ?
 O00T C01Q S005 124.3(3) . . ?
 O00T C01Q O00I 124.4(4) . . ?
 N00N C01R C01O 122.7(4) . . ?
 N00N C01R H01R 118.7 . . ?
 C01O C01R H01R 118.7 . . ?
 N00V C01S C01V 117.1(4) . . ?
 N00V C01S C01Y 120.7(4) . . ?
 C01Y C01S C01V 122.2(4) . . ?
 H01L C01T H01Q 109.5 . . ?
 H01L C01T H01S 109.5 . . ?
 H01Q C01T H01S 109.5 . . ?
 C020 C01T H01L 109.5 . . ?
 C020 C01T H01Q 109.5 . . ?
 C020 C01T H01S 109.5 . . ?
 O00I C01U H01U 109.5 . . ?
 O00I C01U C01X 108.8(4) . . ?
 O00I C01U C028 105.7(4) . . ?
 C01X C01U H01U 109.5 . . ?
 C028 C01U H01U 109.5 . . ?
 C028 C01U C01X 113.7(5) . . ?
 N00O C01V C016 121.3(4) . . ?
 N00O C01V C01S 116.5(4) . . ?
 C016 C01V C01S 122.2(4) . . ?
 C01E C01W H01W 120.8 . . ?
 C01E C01W C024 118.4(4) . . ?
 C024 C01W H01W 120.8 . . ?
 C01U C01X H01T 109.5 . . ?
 C01U C01X H01V 109.5 . . ?
 C01U C01X H01X 109.5 . . ?
 H01T C01X H01V 109.5 . . ?
 H01T C01X H01X 109.5 . . ?
 H01V C01X H01X 109.5 . . ?
 C01S C01Y H01Y 120.3 . . ?
 C024 C01Y C01S 119.4(4) . . ?
 C024 C01Y H01Y 120.3 . . ?
 C015 C01Z H01Z 120.5 . . ?
 C01H C01Z C015 119.1(5) . . ?
 C01H C01Z H01Z 120.5 . . ?
 O00D C020 C01T 108.8(4) . . ?
 O00D C020 H020 109.6 . . ?
 O00D C020 C027 104.4(4) . . ?
 C01T C020 H020 109.6 . . ?
 C01T C020 C027 114.6(5) . . ?
 C027 C020 H020 109.6 . . ?
 N014 C021 H021 118.6 . . ?
 N014 C021 C023 122.8(4) . . ?
 C023 C021 H021 118.6 . . ?
 C013 C022 H022 120.4 . . ?
 C025 C022 C013 119.2(4) . . ?
 C025 C022 H022 120.4 . . ?
 C021 C023 H023 121.0 . . ?
 C025 C023 C021 117.9(4) . . ?
 C025 C023 H023 121.0 . . ?
 C01W C024 C01Y 119.6(4) . . ?
 C01W C024 H024 120.2 . . ?
 C01Y C024 H024 120.2 . . ?
 C022 C025 H025 120.0 . . ?
 C023 C025 C022 120.0(4) . . ?
 C023 C025 H025 120.0 . . ?
 C01K C026 H026 119.9 . . ?
 C01O C026 C01K 120.1(5) . . ?
 C01O C026 H026 119.9 . . ?
 C020 C027 H02A 109.5 . . ?
 C020 C027 H02B 109.5 . . ?
 C020 C027 H02C 109.5 . . ?
 H02A C027 H02B 109.5 . . ?
 H02A C027 H02C 109.5 . . ?
 H02B C027 H02C 109.5 . . ?
 C01U C028 H02D 109.5 . . ?
 C01U C028 H02E 109.5 . . ?
 C01U C028 H02F 109.5 . . ?
 H02D C028 H02E 109.5 . . ?
 H02D C028 H02F 109.5 . . ?
 H02E C028 H02F 109.5 . . ?

loop_
  _geom_torsion_atom_site_label_1
  _geom_torsion_atom_site_label_2
  _geom_torsion_atom_site_label_3
  _geom_torsion_atom_site_label_4
  _geom_torsion
  _geom_torsion_site_symmetry_1
  _geom_torsion_site_symmetry_2
  _geom_torsion_site_symmetry_3
  _geom_torsion_site_symmetry_4
  _geom_torsion_publ_flag
 Ag01 S005 C01Q O00I -108.4(3) . . . . ?
 Ag01 S005 C01Q O00T 71.3(4) . . . . ?
 Ag01 S006 C018 O00D 2.1(4) . . . . ?
 Ag01 S006 C018 O00P -177.5(4) . . . . ?
 Ag01 N00O C01D C01G 174.2(3) . . . . ?
 Ag01 N00O C01V C016 -175.0(3) . . . . ?
 Ag01 N00O C01V C01S 2.8(4) . . . . ?
 Ag01 N00V C01E C01W 172.4(3) . . . . ?
 Ag01 N00V C01S C01V 9.9(4) . . . . ?
 Ag01 N00V C01S C01Y -171.3(3) . . . . ?
 Ag02 S005 C01Q O00I 1.3(3) . . . . ?
 Ag02 S005 C01Q O00T -179.0(3) . . . . ?
 Ag02 S006 C018 O00D 118.2(3) 1_545 . . . ?
 Ag02 S006 C018 O00P -61.4(4) 1_545 . . . ?
 Ag02 N00L C00X C015 -168.6(4) . . . . ?
 Ag02 N00L C012 C01H 167.9(3) . . . . ?
 Ag02 N00L C012 C01L -11.5(4) . . . . ?
 Ag02 N00U C01L C00Z 177.6(3) . . . . ?
 Ag02 N00U C01L C012 -2.3(5) . . . . ?
 Ag02 N00U C01M C01I -178.5(3) . . . . ?
 Ag03 S006 C018 O00D -165.1(3) . . . . ?
 Ag03 S006 C018 O00P 15.3(5) . . . . ?
 Ag03 N00Q C00W C013 4.3(4) . . . . ?
 Ag03 N00Q C00W C01A -175.7(3) . . . . ?
 Ag03 N00Q C01J C019 174.6(3) . . . . ?
 Ag03 N014 C021 C023 169.6(3) . . . . ?
 Ag04 S005 C01Q O00I 177.5(3) . . . . ?
 Ag04 S005 C01Q O00T -2.8(4) . . . . ?
 Ag04 N00N C011 C010 -3.3(5) . . . . ?
 Ag04 N00N C011 C01K 179.1(4) . . . . ?
 Ag04 N00N C01R C01O -179.7(4) . . . . ?
 Ag04 N00R C010 C011 -1.9(5) . . . . ?
 Ag04 N00R C010 C01C 176.4(3) . . . . ?
 Ag04 N00R C01F C01N -174.5(3) . . . . ?
 N00L C00X C015 C01Z 1.9(8) . . . . ?
 N00L C012 C01H C01Z 0.7(7) . . . . ?
 N00L C012 C01L N00U 9.1(5) . . . . ?
 N00L C012 C01L C00Z -170.7(4) . . . . ?
 N00N C011 C01K C026 0.4(8) . . . . ?
 N00O C01D C01G C00Y -0.4(7) . . . . ?
 N00Q C00W C013 N014 -10.4(5) . . . . ?
 N00Q C00W C013 C022 170.6(4) . . . . ?
 N00Q C00W C01A C017 0.5(6) . . . . ?
 N00R C010 C011 N00N 3.5(6) . . . . ?
 N00R C010 C011 C01K -179.0(5) . . . . ?
 N00R C010 C01C C01P -1.8(6) . . . . ?
 N00R C01F C01N C01P -1.1(6) . . . . ?
 N00V C01E C01W C024 -1.2(7) . . . . ?
 N00V C01S C01V N00O -8.4(5) . . . . ?
 N00V C01S C01V C016 169.4(4) . . . . ?
 N00V C01S C01Y C024 -1.9(7) . . . . ?
 C00W N00Q C01J C019 0.3(6) . . . . ?
 C00W C013 N014 Ag03 11.3(5) . . . . ?
 C00W C013 N014 C021 -178.0(4) . . . . ?
 C00W C013 C022 C025 178.8(4) . . . . ?
 C00X N00L C012 C01H -0.3(6) . . . . ?
 C00X N00L C012 C01L -179.7(4) . . . . ?
 C00X C015 C01Z C01H -1.4(8) . . . . ?
 C00Y C016 C01V N00O 1.1(6) . . . . ?
 C00Y C016 C01V C01S -176.6(4) . . . . ?
 C00Z C01B C01I C01M 0.2(7) . . . . ?
 C010 N00R C01F C01N 0.6(6) . . . . ?
 C010 C011 C01K C026 -177.0(5) . . . . ?
 C010 C01C C01P C01N 1.2(6) . . . . ?
 C011 N00N C01R C01O -0.3(7) . . . . ?
 C011 C010 C01C C01P 176.4(4) . . . . ?
 C011 C01K C026 C01O 0.2(10) . . . . ?
 C012 N00L C00X C015 -1.1(7) . . . . ?
 C012 C01H C01Z C015 0.1(8) . . . . ?
 C013 C00W C01A C017 -179.5(4) . . . . ?
 C013 N014 C021 C023 -0.6(7) . . . . ?
 C013 C022 C025 C023 -1.1(7) . . . . ?
 N014 C013 C022 C025 -0.2(7) . . . . ?
 N014 C021 C023 C025 -0.7(7) . . . . ?
 C016 C00Y C01G C01D -0.2(7) . . . . ?
 C017 C019 C01J N00Q 0.8(7) . . . . ?
 C018 O00D C020 C01T -82.3(5) . . . . ?
 C018 O00D C020 C027 154.9(4) . . . . ?
 C019 C017 C01A C00W 0.6(6) . . . . ?
 C01A C00W C013 N014 169.6(4) . . . . ?
 C01A C00W C013 C022 -9.4(6) . . . . ?
 C01A C017 C019 C01J -1.2(6) . . . . ?
 C01B C00Z C01L N00U 0.9(6) . . . . ?
 C01B C00Z C01L C012 -179.3(4) . . . . ?
 C01B C01I C01M N00U 1.5(7) . . . . ?
 C01C C010 C011 N00N -174.8(4) . . . . ?
 C01C C010 C011 C01K 2.7(7) . . . . ?
 C01D N00O C01V C016 -1.6(6) . . . . ?
 C01D N00O C01V C01S 176.2(4) . . . . ?
 C01E N00V C01S C01V -177.9(4) . . . . ?
 C01E N00V C01S C01Y 1.0(6) . . . . ?
 C01E C01W C024 C01Y 0.3(7) . . . . ?
 C01F N00R C010 C011 -177.4(4) . . . . ?
 C01F N00R C010 C01C 0.9(6) . . . . ?
 C01F C01N C01P C01C 0.1(6) . . . . ?
 C01G C00Y C016 C01V -0.2(7) . . . . ?
 C01H C012 C01L N00U -170.3(4) . . . . ?
 C01H C012 C01L C00Z 9.9(6) . . . . ?
 C01J N00Q C00W C013 179.0(4) . . . . ?
 C01J N00Q C00W C01A -1.0(6) . . . . ?
 C01L N00U C01M C01I -2.0(6) . . . . ?
 C01L C00Z C01B C01I -1.3(7) . . . . ?
 C01L C012 C01H C01Z -179.9(4) . . . . ?
 C01M N00U C01L C00Z 0.8(6) . . . . ?
 C01M N00U C01L C012 -179.0(3) . . . . ?
 C01Q O00I C01U C01X 78.4(5) . . . . ?
 C01Q O00I C01U C028 -159.2(4) . . . . ?
 C01R N00N C011 C010 177.2(4) . . . . ?
 C01R N00N C011 C01K -0.3(7) . . . . ?
 C01R C01O C026 C01K -0.8(10) . . . . ?
 C01S N00V C01E C01W 0.6(6) . . . . ?
 C01S C01Y C024 C01W 1.1(7) . . . . ?
 C01U O00I C01Q S005 -176.8(3) . . . . ?
 C01U O00I C01Q O00T 3.5(6) . . . . ?
 C01V N00O C01D C01G 1.3(6) . . . . ?
 C01V C01S C01Y C024 177.0(4) . . . . ?
 C01Y C01S C01V N00O 172.7(4) . . . . ?
 C01Y C01S C01V C016 -9.5(6) . . . . ?
 C020 O00D C018 S006 177.5(3) . . . . ?
 C020 O00D C018 O00P -2.9(7) . . . . ?
 C021 C023 C025 C022 1.6(8) . . . . ?
 C022 C013 N014 Ag03 -169.6(3) . . . . ?
 C022 C013 N014 C021 1.1(6) . . . . ?
 C026 C01O C01R N00N 0.9(8) . . . . ?

_shelx_res_file
;
TITL 20wd_wvz_wd4_agbpymtci_0m1_a.res in Pca2(1)
    20wd_wvz_wd4_agbpymtci_0m1.res
    created by SHELXL-2018/3 at 20:52:48 on 04-Dec-2021
REM Old TITL 20wd_wvz_wd4_AgBpyMTCI_0m1 in Pca2(1)
REM SHELXT solution in Pca2(1): R1 0.105, Rweak 0.010, Alpha 0.006
REM <I/s> 0.845 for 608 systematic absences, Orientation a'=c, b'=a, c'=b
REM Flack x = 0.495 ( 0.002 ) from 4784 Parsons' quotients
REM Formula found by SHELXT: C49 N8 O15 S4 Br4
CELL 0.71073 28.2245 7.1755 27.6678 90 90 90
ZERR 4 0.0007 0.0002 0.0007 0 0 0
LATT -1
SYMM -X,-Y,0.5+Z
SYMM 0.5+X,-Y,+Z
SYMM 0.5-X,+Y,0.5+Z
SFAC C H Ag F N O P S
UNIT 192 184 16 48 32 16 8 8

L.S. 25
PLAN  2
TEMP -123.15
CONF
LIST 6
MORE -1
BOND $H
fmap 2
acta
TWIN 1 0 0 0 -1 0 0 0 -1 2
OMIT 0 0 2
OMIT 2 0 0
REM <olex2.extras>
REM <HklSrc "%.\\20wd_wvz_wd4_agbpymtci_0m1.hkl">
REM </olex2.extras>

WGHT    0.019400    2.944500
FVAR       0.12109
AG01  3    0.316249    0.446606    0.576491    11.00000    0.02770    0.03694 =
         0.02373   -0.00431    0.00340    0.00957
AG02  3    0.366496    0.936226    0.622170    11.00000    0.02847    0.03675 =
         0.02675   -0.00832    0.00273    0.00452
AG03  3    0.428098    0.018026    0.531336    11.00000    0.02295    0.04307 =
         0.03177   -0.00751    0.00389    0.00339
AG04  3    0.390909    0.514187    0.500323    11.00000    0.03071    0.04788 =
         0.01952   -0.00259    0.00286    0.00782
S005  8    0.395146    0.658757    0.578860    11.00000    0.02967    0.01986 =
         0.02536   -0.00356   -0.00320    0.00328
S006  8    0.351984    0.158932    0.544286    11.00000    0.02510    0.02113 =
         0.02825   -0.00267   -0.00099    0.00414
P007  7    0.163304    0.568627    0.379856    11.00000    0.02234    0.04336 =
         0.02256   -0.00361   -0.00103   -0.00271
P008  7    0.417146   -0.038043    0.238587    11.00000    0.02627    0.03663 =
         0.02513   -0.00431   -0.00322    0.00144
F009  4    0.192445    0.714728    0.347871    11.00000    0.04782    0.04922 =
         0.03421    0.00164    0.00513   -0.00998
F00A  4    0.459288   -0.042475    0.200112    11.00000    0.02978    0.06504 =
         0.03708   -0.00351    0.00516    0.00559
F00B  4    0.121429    0.569210    0.341203    11.00000    0.03012    0.06977 =
         0.04017   -0.01182   -0.01238    0.00387
F00C  4    0.205398    0.568220    0.418772    11.00000    0.03033    0.07216 =
         0.02666   -0.00158   -0.00796   -0.00441
O00D  6    0.274581    0.103222    0.497159    11.00000    0.02591    0.02646 =
         0.04993   -0.00885   -0.00948    0.00493
F00E  4    0.399462    0.156216    0.216864    11.00000    0.03164    0.05394 =
         0.06561    0.01873    0.00592    0.01049
F00F  4    0.434904   -0.232064    0.259991    11.00000    0.08659    0.04237 =
         0.03638    0.00180    0.00485    0.02373
F00G  4    0.138941    0.739170    0.407948    11.00000    0.03776    0.06946 =
         0.04931   -0.02553    0.00321    0.00604
F00H  4    0.450382    0.070281    0.275743    11.00000    0.04023    0.06328 =
         0.05150   -0.02901   -0.01175    0.00686
O00I  6    0.444369    0.575035    0.654403    11.00000    0.03814    0.02643 =
         0.02808   -0.00499   -0.00878    0.01144
F00J  4    0.383884   -0.144526    0.200689    11.00000    0.04450    0.08218 =
         0.04571   -0.01766   -0.00683   -0.01933
F00K  4    0.375036   -0.033264    0.276867    11.00000    0.04576    0.05629 =
         0.04262   -0.00046    0.01645    0.00046
N00L  5    0.381418    1.025186    0.700553    11.00000    0.02479    0.02466 =
         0.02603   -0.00546    0.00192   -0.00061
F00M  4    0.188456    0.401974    0.351651    11.00000    0.04434    0.04561 =
         0.05388   -0.01748   -0.01043    0.00866
N00N  5    0.366732    0.477888    0.422592    11.00000    0.02222    0.02965 =
         0.02613   -0.00207    0.00118   -0.00054
N00O  5    0.291763    0.529768    0.654494    11.00000    0.02666    0.02495 =
         0.02011   -0.00034    0.00112    0.00104
O00P  6    0.328713   -0.123468    0.487835    11.00000    0.03766    0.03436 =
         0.05455   -0.02085   -0.01387    0.01177
N00Q  5    0.456687   -0.112506    0.459638    11.00000    0.03069    0.02208 =
         0.02493    0.00059    0.00094   -0.00169
N00R  5    0.453468    0.385471    0.456753    11.00000    0.02421    0.02082 =
         0.02821   -0.00132    0.00408   -0.00103
F00S  4    0.134341    0.426202    0.412705    11.00000    0.04952    0.08052 =
         0.05363    0.02049   -0.00013   -0.02790
O00T  6    0.453075    0.373308    0.592802    11.00000    0.04839    0.03755 =
         0.03582   -0.01215   -0.00803    0.01706
N00U  5    0.294921    1.033601    0.657939    11.00000    0.02392    0.02282 =
         0.02507    0.00052    0.00120    0.00133
N00V  5    0.239139    0.551989    0.572952    11.00000    0.02792    0.02628 =
         0.01852    0.00003    0.00328    0.00437
C00W  1    0.502731   -0.160824    0.459290    11.00000    0.03146    0.01808 =
         0.02498    0.00196    0.00617   -0.00481
C00X  1    0.424143    1.006721    0.721491    11.00000    0.02145    0.03547 =
         0.03647   -0.00438    0.00028    0.00464
AFIX  43
H00X  2    0.450459    0.976527    0.701567    11.00000   -1.20000
AFIX   0
C00Y  1    0.260783    0.662237    0.742823    11.00000    0.05097    0.02687 =
         0.01528   -0.00215    0.00613   -0.00290
AFIX  43
H00Y  2    0.250096    0.707103    0.773232    11.00000   -1.20000
AFIX   0
C00Z  1    0.257072    1.150203    0.728917    11.00000    0.02282    0.02717 =
         0.03609   -0.00368    0.00752   -0.00029
AFIX  43
H00Z  2    0.259150    1.186686    0.761856    11.00000   -1.20000
AFIX   0
C010  1    0.445512    0.354704    0.409782    11.00000    0.02696    0.01596 =
         0.03251   -0.00304    0.00404   -0.00094
C011  1    0.397343    0.400193    0.391135    11.00000    0.02459    0.02138 =
         0.02949   -0.00418    0.00459   -0.00301
C012  1    0.343929    1.065130    0.729206    11.00000    0.02581    0.01453 =
         0.02800   -0.00096    0.00052   -0.00113
C013  1    0.528727   -0.137655    0.505731    11.00000    0.02607    0.02314 =
         0.02314    0.00242    0.00678   -0.00123
N014  5    0.506691   -0.044051    0.541334    11.00000    0.02633    0.03028 =
         0.02275   -0.00212    0.00463    0.00063
C015  1    0.431748    1.029234    0.770207    11.00000    0.03242    0.04489 =
         0.03940   -0.00765   -0.01126    0.00301
AFIX  43
H015  2    0.462685    1.018698    0.783454    11.00000   -1.20000
AFIX   0
C016  1    0.230114    0.657195    0.703909    11.00000    0.03345    0.02617 =
         0.02411   -0.00191    0.00694   -0.00233
AFIX  43
H016  2    0.198251    0.697952    0.707189    11.00000   -1.20000
AFIX   0
C017  1    0.497690   -0.244326    0.375682    11.00000    0.05742    0.02507 =
         0.02490   -0.00178    0.01070   -0.00895
AFIX  43
H017  2    0.511793   -0.291287    0.346983    11.00000   -1.20000
AFIX   0
C018  1    0.316381    0.022902    0.504914    11.00000    0.02830    0.02558 =
         0.02686    0.00022   -0.00094    0.00053
C019  1    0.450758   -0.191588    0.376036    11.00000    0.05581    0.02787 =
         0.02120    0.00095   -0.00109   -0.01406
AFIX  43
H019  2    0.432138   -0.199256    0.347502    11.00000   -1.20000
AFIX   0
C01A  1    0.523828   -0.228170    0.417323    11.00000    0.04001    0.02253 =
         0.03075   -0.00143    0.00927   -0.00270
AFIX  43
H01A  2    0.556304   -0.262956    0.417484    11.00000   -1.20000
AFIX   0
C01B  1    0.214431    1.162460    0.704445    11.00000    0.02133    0.03034 =
         0.05133   -0.00174    0.00581    0.00001
AFIX  43
H01B  2    0.186714    1.204940    0.720512    11.00000   -1.20000
AFIX   0
C01C  1    0.481362    0.287787    0.379693    11.00000    0.03070    0.02328 =
         0.03349   -0.00712    0.00594   -0.00274
AFIX  43
H01C  2    0.475043    0.263066    0.346582    11.00000   -1.20000
AFIX   0
C01D  1    0.320917    0.537682    0.692877    11.00000    0.03339    0.02562 =
         0.02677    0.00033   -0.00097   -0.00151
AFIX  43
H01D  2    0.352711    0.496851    0.689026    11.00000   -1.20000
AFIX   0
C01E  1    0.214075    0.555640    0.531796    11.00000    0.03412    0.03560 =
         0.02206    0.00051    0.00161    0.00489
AFIX  43
H01E  2    0.229788    0.527633    0.502312    11.00000   -1.20000
AFIX   0
C01F  1    0.496682    0.353567    0.474654    11.00000    0.02800    0.02367 =
         0.03488    0.00509    0.00041   -0.00100
AFIX  43
H01F  2    0.501815    0.374808    0.508139    11.00000   -1.20000
AFIX   0
C01G  1    0.306848    0.602214    0.737522    11.00000    0.04370    0.03079 =
         0.02335    0.00239   -0.00577   -0.00745
AFIX  43
H01G  2    0.328336    0.605236    0.763940    11.00000   -1.20000
AFIX   0
C01H  1    0.349145    1.085748    0.778711    11.00000    0.03106    0.04393 =
         0.03065   -0.00731    0.00234    0.00514
AFIX  43
H01H  2    0.322349    1.112356    0.798310    11.00000   -1.20000
AFIX   0
C01I  1    0.212780    1.112018    0.656326    11.00000    0.02269    0.02960 =
         0.04968    0.00460   -0.00626    0.00114
AFIX  43
H01I  2    0.183953    1.119556    0.638709    11.00000   -1.20000
AFIX   0
C01J  1    0.431439   -0.127715    0.418467    11.00000    0.04088    0.02527 =
         0.03100    0.00386   -0.00375   -0.00569
AFIX  43
H01J  2    0.398971   -0.092837    0.418822    11.00000   -1.20000
AFIX   0
C01K  1    0.384493    0.371799    0.343302    11.00000    0.03944    0.07698 =
         0.03588   -0.03177   -0.00234    0.01335
AFIX  43
H01K  2    0.406088    0.316227    0.321259    11.00000   -1.20000
AFIX   0
C01L  1    0.297025    1.083593    0.704651    11.00000    0.02426    0.01831 =
         0.02903    0.00113    0.00216    0.00072
C01M  1    0.253421    1.050930    0.634435    11.00000    0.02853    0.02691 =
         0.03724    0.00313   -0.00197   -0.00392
AFIX  43
H01M  2    0.252264    1.019322    0.601113    11.00000   -1.20000
AFIX   0
C01N  1    0.534386    0.291204    0.447016    11.00000    0.02443    0.02434 =
         0.04858    0.00250    0.00036    0.00026
AFIX  43
H01N  2    0.564792    0.272086    0.460882    11.00000   -1.20000
AFIX   0
C01O  1    0.309396    0.504883    0.359663    11.00000    0.02684    0.06607 =
         0.03675   -0.01024   -0.00597    0.00459
AFIX  43
H01O  2    0.278797    0.543746    0.349512    11.00000   -1.20000
AFIX   0
C01P  1    0.526181    0.257683    0.398412    11.00000    0.02622    0.02567 =
         0.04813   -0.00458    0.01482   -0.00020
AFIX  43
H01P  2    0.551048    0.214509    0.378162    11.00000   -1.20000
AFIX   0
C01Q  1    0.435727    0.512157    0.609811    11.00000    0.02502    0.02270 =
         0.02852   -0.00076   -0.00080   -0.00110
C01R  1    0.323792    0.528290    0.407017    11.00000    0.02252    0.04119 =
         0.02932   -0.00090    0.00452    0.00033
AFIX  43
H01R  2    0.302291    0.582399    0.429398    11.00000   -1.20000
AFIX   0
C01S  1    0.217270    0.589785    0.614975    11.00000    0.02847    0.01650 =
         0.02087   -0.00040    0.00247    0.00249
C01T  1    0.256573    0.055243    0.412186    11.00000    0.07810    0.04841 =
         0.04802    0.00150   -0.03101   -0.01475
AFIX 137
H01L  2    0.253861    0.190403    0.407917    11.00000   -1.50000
H01Q  2    0.235529   -0.008044    0.389287    11.00000   -1.50000
H01S  2    0.289368    0.016639    0.406261    11.00000   -1.50000
AFIX   0
C01U  1    0.479757    0.469469    0.682753    11.00000    0.04123    0.02523 =
         0.03206    0.00472   -0.01190    0.00479
AFIX  13
H01U  2    0.474942    0.332865    0.677548    11.00000   -1.20000
AFIX   0
C01V  1    0.247038    0.590547    0.659409    11.00000    0.03187    0.01886 =
         0.02082   -0.00089    0.00385   -0.00277
C01W  1    0.166583    0.598213    0.530455    11.00000    0.03473    0.04047 =
         0.03052   -0.00144   -0.00731    0.00305
AFIX  43
H01W  2    0.149923    0.602038    0.500637    11.00000   -1.20000
AFIX   0
C01X  1    0.528845    0.524066    0.665942    11.00000    0.03730    0.05431 =
         0.06873    0.02438   -0.02034   -0.00696
AFIX 137
H01T  2    0.532154    0.495950    0.631445    11.00000   -1.50000
H01V  2    0.552573    0.453787    0.684286    11.00000   -1.50000
H01X  2    0.533602    0.657822    0.671207    11.00000   -1.50000
AFIX   0
C01Y  1    0.168916    0.629545    0.616091    11.00000    0.02930    0.04097 =
         0.03065   -0.00965    0.00596    0.00245
AFIX  43
H01Y  2    0.153438    0.652556    0.645991    11.00000   -1.20000
AFIX   0
C01Z  1    0.393260    1.067581    0.799439    11.00000    0.04630    0.05575 =
         0.02895   -0.00709   -0.00812    0.00512
AFIX  43
H01Z  2    0.397182    1.081218    0.833357    11.00000   -1.20000
AFIX   0
C020  1    0.242729    0.004294    0.462864    11.00000    0.03147    0.02769 =
         0.06260   -0.00970   -0.02109   -0.00132
AFIX  13
H020  2    0.245951   -0.133360    0.467450    11.00000   -1.20000
AFIX   0
C021  1    0.529219   -0.014881    0.583139    11.00000    0.03114    0.04126 =
         0.02521   -0.00233    0.00402    0.00076
AFIX  43
H021  2    0.513363    0.052520    0.607872    11.00000   -1.20000
AFIX   0
C022  1    0.574327   -0.206730    0.512421    11.00000    0.02926    0.03951 =
         0.04129   -0.00660    0.00784    0.00741
AFIX  43
H022  2    0.589771   -0.273209    0.487251    11.00000   -1.20000
AFIX   0
C023  1    0.574551   -0.078564    0.591885    11.00000    0.03647    0.04411 =
         0.02693    0.00034   -0.00370    0.00149
AFIX  43
H023  2    0.589889   -0.054676    0.621815    11.00000   -1.20000
AFIX   0
C024  1    0.143788    0.635135    0.573366    11.00000    0.02576    0.04757 =
         0.04164   -0.00777   -0.00437    0.00659
AFIX  43
H024  2    0.110956    0.664285    0.573558    11.00000   -1.20000
AFIX   0
C025  1    0.596814   -0.177614    0.555950    11.00000    0.03063    0.04734 =
         0.04601   -0.00132   -0.00618    0.00982
AFIX  43
H025  2    0.627727   -0.226023    0.561135    11.00000   -1.20000
AFIX   0
C026  1    0.339891    0.425367    0.328132    11.00000    0.04690    0.10038 =
         0.03633   -0.02676   -0.01282    0.00852
AFIX  43
H026  2    0.330638    0.406294    0.295492    11.00000   -1.20000
AFIX   0
C027  1    0.193386    0.065248    0.477344    11.00000    0.03274    0.04660 =
         0.11524   -0.02164   -0.02256    0.00470
AFIX 137
H02A  2    0.187921    0.034145    0.511380    11.00000   -1.50000
H02B  2    0.169985    0.000890    0.457191    11.00000   -1.50000
H02C  2    0.190307    0.200170    0.472835    11.00000   -1.50000
AFIX   0
C028  1    0.470121    0.516699    0.734855    11.00000    0.09565    0.05419 =
         0.03318    0.00061   -0.01784    0.02748
AFIX 137
H02D  2    0.474520    0.650795    0.739857    11.00000   -1.50000
H02E  2    0.492097    0.447659    0.755625    11.00000   -1.50000
H02F  2    0.437474    0.482386    0.742995    11.00000   -1.50000
AFIX   0
HKLF 4


REM  20wd_wvz_wd4_agbpymtci_0m1_a.res in Pca2(1)
REM wR2 = 0.0518, GooF = S = 1.052, Restrained GooF = 1.052 for all data
REM R1 = 0.0245 for 12163 Fo > 4sig(Fo) and 0.0300 for all 13261 data
REM 725 parameters refined using 1 restraints

END

WGHT      0.0194      2.9445

REM Highest difference peak  1.005,  deepest hole -0.545,  1-sigma level  0.081
Q1    1   0.3904  0.3915  0.5006  11.00000  0.05    1.00
Q2    1   0.4275 -0.1035  0.5307  11.00000  0.05    0.83
;
_shelx_res_checksum                71998
_shelx_hkl_file
;
   0   0  -1   -1.80    0.10
   0   0  -1   -1.80    0.10
   0   0  -1   -1.80    0.10
   0   0   1   -1.80    0.10
   0   0  -1   -1.80    0.10
   0   0   1   -1.80    0.10
   0   0   1   -2.00    0.10
   0   0   1   -1.90    0.10
   0   0   2 1218.48   58.99
   0   0   3   -1.20    0.30
   0   0  -3   -1.80    0.20
   0   0  -3   -1.00    0.30
   0   0   3   -1.60    0.50
   0   0   3   -1.30    0.30
   0   0   3   -2.10    0.20
   0   0  -3   -1.90    0.20
   0   0   3   -2.00    0.20
   0   0   4   83.49    3.00
   0   0  -4   86.59    2.80
   0   0  -4   88.79    3.40
   0   0   4   87.69    3.30
   0   0  -4   81.59    2.80
   0   0   4   87.79    2.90
   0   0  -4   86.89    3.00
   0   0   4   81.89    2.80
   0   0  -5    0.70    0.80
   0   0  -5   -0.10    0.30
   0   0   5   -0.70    0.30
   0   0   5   -0.20    0.30
   0   0   5    1.60    0.80
   0   0   5   -0.40    0.30
   0   0   5   -0.40    0.30
   0   0  -5    0.50    0.40
   0   0  -5    1.40    0.40
   0   0  -5    0.00    0.30
   0   0  -6 1884.11   63.79
   0   0   6 1830.82   63.79
   0   0   6 1862.01   55.19
   0   0  -6 1832.82   50.79
   0   0  -6 1809.92   50.89
   0   0  -6 1847.52   55.19
   0   0   6 1791.02   50.79
   0   0   6 1832.92   50.89
   0   0   7    0.40    0.50
   0   0   7   -0.40    0.40
   0   0  -7    0.10    0.40
   0   0  -7   -0.30    0.40
   0   0  -7   -0.20    0.40
   0   0   7   -0.50    0.40
   0   0   7   -0.20    0.40
   0   0  -7   -0.30    0.40
   0   0  -7   -0.50    0.70
   0   0   7   -0.10    0.80
   0   0  -8  822.82   27.10
   0   0   8  779.02   26.90
   0   0   8  757.52   21.80
   0   0  -8  776.42   21.80
   0   0  -8  769.42   21.80
   0   0   8  752.42   23.50
   0   0  -8  781.82   23.50
   0   0   8  769.02   21.80
   0   0  -8  638.74   38.40
   0   0  -9   -0.50    0.80
   0   0   9   -0.60    0.40
   0   0   9   -1.30    0.70
   0   0  -9   -0.30    0.50
   0   0   9   -0.30    0.40
   0   0  -9    0.20    0.50
   0   0   9    0.30    0.50
   0   0   9    0.30    0.50
   0   0  -9   -0.10    0.50
   0   0  -9   -0.10    0.50
   0   0  10  465.95   15.00
   0   0 -10  462.95   14.00
   0   0 -10  402.06   24.80
   0   0 -10  494.75   17.20
   0   0 -10  471.45   14.00
   0   0  10  458.35   14.00
   0   0  10  488.75   14.00
   0   0  10  469.35   17.00
   0   0 -10  488.65   15.10
   0   0  11    0.90    0.60
   0   0 -11    0.90    0.70
   0   0  11    0.50    0.60
   0   0  11    1.10    0.60
   0   0  11   -1.00    0.50
   0   0 -11    0.00    0.50
   0   0 -11    1.20    0.60
   0   0 -11   -0.10    0.50
   0   0  11    0.00    0.40
   0   0 -11    0.30    1.20
   0   0 -11   -0.70    0.50
   0   0 -12  172.08   11.90
   0   0  12  184.78    6.90
   0   0  12  180.18    7.50
   0   0 -12  200.08    7.90
   0   0  12  181.88    6.60
   0   0 -12  186.38    6.50
   0   0  12  189.08    6.60
   0   0  12  185.48    6.40
   0   0 -12  181.58    6.50
   0   0 -12  187.98    6.60
   0   0 -12  192.38    6.90
   0   0 -13   -2.20    1.40
   0   0 -13    1.10    1.10
   0   0 -13   -1.50    0.70
   0   0 -13   -0.90    0.70
   0   0  13   -1.00    0.70
   0   0  13   -2.20    0.50
   0   0 -13   -1.50    0.70
   0   0  13   -1.70    0.60
   0   0 -13   -0.60    0.80
   0   0  13   -2.50    0.60
   0   0 -14  592.44   20.70
   0   0  14  519.65   16.70
   0   0  14  557.84   16.80
   0   0 -14  524.95   16.70
   0   0  14  551.04   17.10
   0   0 -14  561.34   17.20
   0   0  14  547.05   17.90
   0   0 -14  513.95   29.90
   0   0 -14  580.54   18.00
   0   0  14  553.14   20.20
   0   0 -14  559.14   16.80
   0   0 -15   -0.10    0.70
   0   0 -15    1.40    1.60
   0   0  15    2.10    0.80
   0   0 -15    3.00    1.10
   0   0  15    2.00    0.80
   0   0  15    2.00    0.80
   0   0  15   -0.60    0.50
   0   0 -15    0.80    0.70
   0   0 -15    0.60    0.80
   0   0 -16  151.68    5.60
   0   0  16  156.58    6.00
   0   0  16  151.98    6.50
   0   0  16  150.78    6.10
   0   0 -16  141.99   10.70
   0   0 -16  155.78    6.20
   0   0 -16  153.28    7.00
   0   0  16  138.89    5.80
   0   0  16  149.99    5.60
   0   0 -16  161.48    6.00
   0   0 -16  139.19    5.80
   0   0 -17    3.50    1.20
   0   0  17    1.60    0.90
   0   0  17    0.40    0.70
   0   0 -17    1.90    0.80
   0   0 -17    2.00    1.80
   0   0  17    2.00    0.90
   0   0  17    2.80    0.90
   0   0 -17    2.20    0.90
   0   0 -17    0.50    0.80
   0   0  18  271.67   10.20
   0   0  18  272.97    9.80
   0   0  18  275.07    9.40
   0   0 -18  304.87   12.00
   0   0 -18  292.07    9.80
   0   0 -18  266.57   17.50
   0   0 -18  267.27    9.20
   0   0 -18  285.57    9.50
   0   0  18  276.07   11.10
   0   0  19    3.10    1.00
   0   0 -19    3.20    2.20
   0   0  19    2.10    1.00
   0   0 -19    4.30    1.50
   0   0  19    2.50    1.00
   0   0 -20  189.58    7.10
   0   0 -20  200.58    7.10
   0   0 -20  194.68   13.70
   0   0  20  191.78    7.60
   0   0  20  190.48    7.00
   0   0  20  182.18    7.60
   0   0 -21    6.70    2.80
   0   0  21    6.50    1.40
   0   0  21    4.10    1.30
   0   0  22  294.17   11.10
   0   0 -22  292.47   10.20
   0   0 -22  301.57   10.20
   0   0  22  288.07   10.20
   0   0 -22  313.77   19.40
   0   0  22  293.57   10.80
   0   0  24 1864.71   58.69
   0   0 -24 2041.90   99.89
   0   0 -24 1967.30   58.39
   0   0 -26 1736.93   85.89
   0   0  26 1584.24   50.19
   0   0  28   15.10    2.10
   0   0  29    2.70    1.40
   0   0  30   58.89    3.70
   0   0  31    0.90    1.20
   0   0  32   48.90    3.50
   0   0  33    3.80    1.50
   0   0  34   88.89    4.90
   0   0  35    0.50    1.40
   0   0  36    5.30    1.80
   0   1   0   -6.70    0.60
   0   1   0   -8.20    0.60
   0   1   0   -7.40    0.30
   0   1   0   -6.40    0.30
   0  -1   0   -8.40    0.60
   0   1  -1   -2.50    0.20
   0   1  -1   -3.10    0.50
   0   1  -1   -2.80    0.20
   0   1   1   -2.60    0.40
   0   1  -1   -3.50    0.20
   0   1  -1   -3.10    0.40
   0   1  -1   -2.80    0.40
   0   1   1   -1.20    0.40
   0  -1  -1   -1.90    0.50
   0  -1   1   -2.20    0.20
   0  -1   1   -3.40    0.30
   0  -1   1   -3.20    0.20
   0  -1   1   -2.80    0.60
   0  -1   1   -2.10    0.50
   0  -1  -1   -3.70    0.20
   0  -1   1   -3.40    0.20
   0   1   2 1396.06   40.80
   0   1  -2 1375.76   66.19
   0   1  -2 1361.06   37.50
   0   1  -2 1391.36   37.50
   0   1  -2 1327.47   47.60
   0   1   2 1402.56   37.30
   0   1   2 1392.86   37.30
   0   1  -2 1387.76   41.00
   0   1   2 1371.86   47.40
   0   1   2 1414.86   40.80
   0  -1   2 1331.47   37.50
   0  -1   2 1318.87   41.00
   0  -1  -2 1225.78   37.30
   0  -1   2 1391.56   47.70
   0  -1  -2 1293.27   37.30
   0  -1   2 1417.16   66.29
   0   1   3    0.10    0.20
   0   1  -3    0.70    0.30
   0   1  -3    0.10    0.30
   0   1  -3    0.30    0.50
   0   1   3    0.00    0.20
   0   1  -3   -0.20    0.30
   0   1  -3    0.00    0.30
   0   1   3    0.00    0.20
   0   1   3    0.00    0.40
   0  -1   3   -0.30    0.30
   0  -1  -3    0.50    0.20
   0  -1  -3    0.00    0.20
   0  -1   3   -0.30    0.10
   0  -1   3    0.10    0.50
   0  -1   3   -0.30    0.40
   0  -1   3   -0.10    0.20
   0  -1  -3    0.30    0.30
   0   1   4 1994.30   55.29
   0   1   4 2069.19   97.29
   0   1   4 1999.50   55.29
   0   1  -4 2052.19   60.39
   0   1  -4 2110.59   97.59
   0   1  -4 1958.90   55.49
   0   1   4 1986.80   60.09
   0   1  -4 1931.91   69.99
   0   1  -4 2019.90   55.49
   0  -1  -4 2018.50   60.09
   0  -1   4 2043.60   70.09
   0  -1  -4 1999.00   55.69
   0  -1  -4 1960.90   55.29
   0  -1   4 1967.80   55.39
   0  -1  -4 1979.70   97.29
   0  -1   4 2116.99   97.59
   0  -1  -4 2006.30   55.29
   0  -1   4 1981.10   60.39
   0   1  -5    0.80    0.70
   0   1   5    0.00    0.30
   0   1   5   -0.10    0.30
   0   1  -5    0.30    0.40
   0   1   5   -0.50    0.30
   0   1   5   -0.50    0.30
   0   1  -5   -0.30    0.30
   0   1  -5   -0.40    0.40
   0   1  -5   -0.30    0.40
   0  -1  -5   -0.40    0.30
   0  -1   5   -0.10    0.30
   0  -1   5    0.50    0.70
   0  -1  -5    0.50    0.30
   0  -1  -5    0.40    0.50
   0  -1   5   -0.70    0.40
   0  -1   5   -0.20    0.40
   0  -1   5   -0.80    0.30
   0  -1  -5   -0.40    0.30
   0   1  -6  216.78   10.80
   0   1   6  209.08   10.30
   0   1  -6  193.08    6.10
   0   1  -6  180.08    7.50
   0   1   6  187.48    5.90
   0   1   6  192.38    7.10
   0   1   6  187.18    6.20
   0   1   6  187.28    5.90
   0   1  -6  187.68    6.10
   0   1  -6  193.78    6.60
   0  -1  -6  184.78    5.90
   0  -1   6  188.68    6.10
   0  -1  -6  192.78    6.20
   0  -1   6  213.38   10.80
   0  -1   6  190.48    7.60
   0  -1   6  188.58    6.60
   0  -1   6  180.78    6.00
   0  -1  -6  192.28   10.20
   0   1   7    0.10    0.40
   0   1  -7    0.50    0.50
   0   1   7    0.30    0.40
   0   1  -7    0.60    0.50
   0   1   7    0.40    0.30
   0   1   7    0.70    0.30
   0   1   7    0.20    0.40
   0   1  -7   -0.60    0.40
   0   1  -7    0.30    0.80
   0   1  -7    0.30    0.50
   0  -1   7   -0.30    0.40
   0  -1  -7    0.60    0.40
   0  -1  -7    1.10    0.40
   0  -1   7    0.60    0.50
   0  -1  -7   -0.20    0.20
   0  -1   7   -0.20    0.50
   0  -1  -7    0.70    0.60
   0  -1  -7    1.40    0.40
   0  -1   7    1.00    0.90
   0  -1   7    0.30    0.40
   0   1   8  805.12   23.10
   0   1   8  813.32   23.10
   0   1  -8  801.82   29.10
   0   1  -8  836.42   25.30
   0   1  -8  829.92   41.20
   0   1  -8  813.02   23.30
   0   1   8  800.02   24.90
   0   1   8  845.32   40.60
   0   1   8  720.93   28.70
   0   1  -8  806.82   23.30
   0  -1  -8  848.92   28.60
   0  -1  -8  848.22   40.50
   0  -1  -8  824.12   23.10
   0  -1  -8  826.62   24.90
   0  -1   8  813.92   23.30
   0  -1   8  798.32   25.30
   0  -1   8  812.42   29.20
   0  -1   8  801.12   23.30
   0   1  -9    0.10    0.50
   0   1  -9    0.10    0.60
   0   1   9    0.20    0.50
   0   1  -9    2.80    1.40
   0   1   9    0.20    0.40
   0   1   9    0.20    0.70
   0   1  -9    0.50    0.50
   0   1  -9    0.40    0.50
   0   1   9    0.40    0.50
   0  -1   9   -0.20    0.50
   0  -1   9   -0.30    0.50
   0  -1  -9    0.40    0.50
   0  -1   9    0.10    0.50
   0  -1  -9    0.20    0.70
   0  -1   9    0.40    0.60
   0  -1  -9    0.80    0.40
   0  -1  -9    0.40    0.40
   0  -1  -9   -0.30    0.30
   0   1 -10 2032.80   70.99
   0   1 -10 2133.29   60.19
   0   1 -10 2088.09   61.49
   0   1  10 1995.00   61.09
   0   1  10 2050.39   56.49
   0   1 -10 2095.19   56.69
   0   1  10 1915.31   70.69
   0   1  10 1967.20   56.39
   0   1 -10 1900.51   99.89
   0   1 -10 2003.80   56.59
   0  -1  10 1963.00   61.49
   0  -1  10 2037.40   71.19
   0  -1 -10 2037.10   70.59
   0  -1  10 2027.00   59.49
   0  -1 -10 2108.39   99.09
   0  -1 -10 2074.39   56.49
   0  -1 -10 2034.90   61.09
   0  -1  10 2049.09   56.69
   0  -1  10 2000.90   56.69
   0   1 -11   -1.00    0.70
   0   1 -11    0.10    0.70
   0   1  11    0.60    0.50
   0   1 -11    0.00    1.20
   0   1 -11    0.70    0.80
   0   1  11    2.00    0.70
   0   1  11    0.70    0.60
   0   1  11    0.40    0.50
   0   1 -11    0.20    0.70
   0   1 -11    3.20    0.70
   0  -1  11    1.20    0.80
   0  -1 -11    1.20    0.70
   0  -1  11    0.00    0.60
   0  -1 -11    1.00    1.10
   0  -1 -11    0.60    0.50
   0  -1  11    1.60    0.80
   0  -1 -11    0.80    0.70
   0  -1  11    0.40    0.60
   0  -1 -11    0.30    0.50
   0  -1  11   -0.20    0.50
   0   1  12 5560.64  169.28
   0   1 -12 5748.12  165.98
   0   1  12 5851.91  155.98
   0   1  12 5644.04  195.88
   0   1 -12 5850.41  169.68
   0   1  12 5574.54  155.88
   0   1 -12 5741.03  196.48
   0   1 -12 5634.34  156.08
   0   1 -12 5799.92  156.18
   0  -1  12 5608.54  156.18
   0  -1 -12 5172.18  195.88
   0  -1  12 5671.13  196.58
   0  -1 -12 5755.92  155.88
   0  -1  12 5690.73  165.28
   0  -1 -12 5812.32  274.07
   0  -1  12 5376.76  169.68
   0  -1 -12 5875.11  155.98
   0  -1 -12 5521.05  169.28
   0  -1  12 5772.42  156.08
   0  -1 -12 5612.64  150.58
   0   1  13   -0.20    0.70
   0   1  13   -0.10    0.70
   0   1 -13   -2.00    1.00
   0   1  13   -1.00    0.60
   0   1 -13    3.60    0.90
   0   1 -13   -0.60    0.80
   0   1 -13    0.50    1.90
   0   1 -13   -0.10    0.90
   0  -1 -13    0.90    0.80
   0  -1 -13   -0.70    1.30
   0  -1  13    0.40    0.80
   0  -1 -13    0.50    0.80
   0  -1  13    0.70    0.80
   0  -1  13   -0.20    0.70
   0  -1 -13    3.00    0.90
   0  -1 -13   -0.10    0.80
   0   1  14 1540.75   43.90
   0   1  14 1556.94   47.40
   0   1  14 1586.74   54.29
   0   1 -14 1579.14   44.30
   0   1  14 1596.74   46.00
   0   1 -14 1587.64   46.70
   0   1 -14 1596.54   47.80
   0   1  14 1507.45   44.00
   0   1 -14 1504.15   44.10
   0   1 -14 1587.94   54.99
   0  -1 -14 1418.66   54.49
   0  -1 -14 1598.14   44.00
   0  -1  14 1475.25   47.70
   0  -1 -14 1529.15   42.40
   0  -1  14 1554.54   44.20
   0  -1  14 1548.65   44.20
   0  -1  14 1520.55   55.09
   0  -1  14 1534.05   46.00
   0  -1 -14 1549.05   47.40
   0  -1 -14 1628.24   77.19
   0   1 -15    0.20    1.70
   0   1 -15   -0.70    0.90
   0   1 -15    3.70    1.00
   0   1  15    1.90    0.80
   0   1  15    0.90    0.70
   0   1  15   -0.90    0.50
   0   1  15    3.70    0.90
   0   1 -15    0.30    0.80
   0   1  15    0.30    0.70
   0   1 -15    3.10    0.90
   0  -1 -15    1.10    0.70
   0  -1  15    1.20    0.90
   0  -1 -15    0.20    0.60
   0  -1 -15    0.50    1.20
   0  -1  15   -0.40    0.60
   0  -1  15    2.40    0.80
   0  -1  15    2.80    0.90
   0  -1  15    1.00    0.80
   0  -1 -15   -0.10    0.80
   0   1 -16  429.46   14.10
   0   1 -16  436.86   14.20
   0   1  16  457.35   14.80
   0   1  16  450.45   14.00
   0   1  16  427.26   14.00
   0   1  16  454.05   16.40
   0   1 -16  450.45   14.70
   0   1 -16  470.65   17.10
   0   1  16  440.56   14.00
   0  -1 -16  449.95   14.80
   0  -1 -16  451.45   24.40
   0  -1 -16  398.56   16.50
   0  -1 -16  441.46   14.00
   0  -1  16  435.16   15.10
   0  -1 -16  445.66   13.40
   0  -1  16  447.76   14.30
   0  -1  16  446.66   17.10
   0  -1  16  437.56   14.00
   0  -1  16  457.25   14.20
   0   1 -17    0.30    0.90
   0   1 -17    1.40    0.90
   0   1 -17    0.60    0.90
   0   1  17   -0.20    0.60
   0   1  17    0.00    0.70
   0   1 -17    0.50    1.80
   0   1  17    0.10    0.60
   0   1  17    1.10    0.80
   0   1 -17    0.40    0.80
   0  -1  17   -0.10    0.70
   0  -1 -17    1.10    0.80
   0  -1  17    1.60    1.00
   0  -1  17   -0.10    0.80
   0  -1  17    1.10    0.90
   0  -1  17    0.40    0.70
   0  -1 -17    0.60    0.80
   0  -1 -17    0.10    1.30
   0  -1 -17    1.60    1.00
   0   1 -18   98.89    4.70
   0   1 -18   77.29    8.30
   0   1 -18  103.79    4.70
   0   1  18   99.79    4.50
   0   1 -18  100.29    4.80
   0   1  18   96.39    4.10
   0   1  18   96.89    4.50
   0   1 -18  114.99    5.40
   0   1  18   99.79    4.60
   0  -1  18   96.59    4.10
   0  -1  18  113.09    5.10
   0  -1 -18   99.89    7.90
   0  -1  18   91.99    4.60
   0  -1 -18   92.89    4.20
   0  -1  18  105.49    4.80
   0  -1 -18  100.99    4.60
   0  -1  18   99.09    5.20
   0   1 -19   -1.10    0.90
   0   1  19    0.80    1.00
   0   1 -19    1.60    1.90
   0   1  19    0.70    0.80
   0   1 -19    1.70    1.10
   0   1 -19   -0.30    0.90
   0   1  19    1.30    0.90
   0  -1 -19    0.60    1.40
   0  -1  19    2.00    1.10
   0  -1  19   -0.20    0.70
   0  -1  19    0.40    1.00
   0  -1  19    2.00    1.10
   0  -1 -19    1.30    0.90
   0   1  20  129.29    5.80
   0   1  20  132.29    5.70
   0   1  20  125.29    5.20
   0   1 -20  131.69    5.70
   0   1 -20  143.89    6.70
   0   1 -20  105.79   10.30
   0  -1 -20  125.49    5.40
   0  -1  20  141.59    6.20
   0  -1  20  133.59    5.30
   0  -1  20  134.39    6.60
   0  -1 -20  142.69   10.10
   0   1  21    0.80    0.90
   0   1 -21   -0.50    1.10
   0   1  21   -1.10    0.90
   0   1 -21    0.70    2.40
   0   1  21   -0.50    0.80
   0  -1 -21    0.90    2.00
   0  -1  21    0.80    1.10
   0  -1 -21    0.20    1.10
   0  -1  21   -0.40    0.80
   0   1  22   36.10    2.70
   0   1  22   33.40    2.40
   0   1 -22   35.00    2.90
   0   1  22   34.60    2.80
   0   1 -22   28.80    5.70
   0  -1 -22   36.10    2.80
   0  -1  22   31.90    2.40
   0  -1 -22   36.40    5.00
   0   1 -23   -0.60    1.30
   0   1 -23    3.60    3.20
   0   1  23   -0.40    0.90
   0   1  23    0.80    1.30
   0  -1  23    0.20    0.90
   0  -1 -23    1.00    2.40
   0  -1 -23   -0.60    1.00
   0   1 -24   40.40    6.30
   0   1 -24   37.20    3.20
   0   1  24   40.50    2.70
   0  -1 -24   47.40    6.10
   0  -1  24   40.60    2.80
   0  -1 -24   38.20    3.20
   0   1 -25    3.10    1.80
   0   1 -25    6.50    3.90
   0  -1 -25    2.30    2.90
   0  -1 -25    5.10    1.60
   0   1  26  221.98    8.70
   0   1 -26  236.08    9.10
   0  -1 -26  250.87   16.50
   0  -1 -26  240.78    9.10
   0  -1  26  231.38    8.70
   0   1  27    5.80    1.40
   0   1 -27    7.20    2.20
   0  -1  27    7.80    1.60
   0   1  28  219.38    8.80
   0   1 -28  245.78    9.20
   0  -1  28  238.38    8.90
   0   1  29    7.10    1.70
   0   1 -29    3.90    2.30
   0  -1  29    6.40    1.60
   0   1 -30  130.09    6.50
   0   1  30  119.09    5.80
   0  -1  30  127.29    5.70
   0   1  31    1.00    1.20
   0   1 -31    4.60    2.60
   0  -1  31    1.70    1.30
   0   1  32   61.19    4.00
   0  -1  32   68.69    4.00
   0   1  33    1.20    1.40
   0  -1  33    2.20    1.40
   0   1  34   55.89    3.90
   0  -1  34   61.29    3.90
   0   1  35    4.70    1.80
   0  -1  35    4.50    1.70
   0   1  36  130.09    6.60
   0  -1  36  143.79    6.50
   0   2   0 9704.73  262.27
   0   2   0 9976.70  285.37
   0   2   0 9912.41  462.55
   0   2   0 9088.69  331.07
   0   2   0 9286.17  262.27
   0  -2   0 9999.00  263.67
   0  -2   0 9859.31  262.07
   0  -2   0 8555.84  261.87
   0  -2   0 9697.33  286.27
   0  -2   0 9735.03  331.07
   0   2  -1   -0.30    0.30
   0   2  -1   -0.30    1.00
   0   2   1    1.10    0.70
   0   2  -1    1.50    0.60
   0   2  -1   -0.30    0.70
   0   2   1   -0.30    0.50
   0   2  -1   -0.20    0.30
   0   2  -1   -0.20    0.30
   0  -2   1    1.10    0.30
   0  -2  -1   -0.60    0.50
   0  -2   1    0.80    0.30
   0  -2   1   -0.50    0.70
   0  -2  -1    0.30    0.70
   0  -2   1    0.40    0.50
   0   2  -2 2946.31   82.29
   0   2  -2 3051.79  145.49
   0   2  -2 3017.50   89.99
   0   2  -2 2836.82  104.49
   0   2  -2 3043.90   85.49
   0   2   2 2879.61  104.39
   0   2   2 3072.09   89.79
   0   2  -2 3049.20   82.29
   0  -2   2 2876.21   82.29
   0  -2   2 2950.70   89.99
   0  -2   2 3060.59  145.49
   0  -2  -2 3053.29   89.79
   0  -2   2 3051.49   82.29
   0  -2  -2 3031.00   82.99
   0  -2   2 3118.19   85.19
   0  -2   2 2961.90  104.59
   0   2  -3    0.50    0.90
   0   2   3    0.30    0.60
   0   2  -3   -0.20    0.50
   0   2   3   -0.10    0.20
   0   2  -3   -0.10    0.40
   0   2  -3    0.30    0.70
   0   2   3   -0.60    0.40
   0   2   3   -0.30    0.20
   0   2  -3    0.10    0.40
   0  -2   3    0.10    0.90
   0  -2  -3    0.20    0.20
   0  -2  -3   -0.70    0.40
   0  -2  -3   -0.40    0.20
   0  -2   3    0.00    0.50
   0  -2   3   -0.50    0.30
   0  -2   3    0.10    0.30
   0  -2   3    0.40    0.70
   0  -2   3    0.30    0.30
   0   2   4  488.95   13.50
   0   2   4  474.85   17.60
   0   2  -4  490.35   24.90
   0   2  -4  462.85   17.90
   0   2   4  499.55   15.10
   0   2  -4  501.25   15.40
   0   2   4  481.95   13.50
   0   2  -4  466.15   13.90
   0   2  -4  493.95   13.90
   0   2   4  470.25   15.00
   0  -2   4  491.75   13.90
   0  -2   4  484.75   18.10
   0  -2  -4  488.65   14.00
   0  -2   4  471.55   15.40
   0  -2  -4  473.75   13.50
   0  -2  -4  497.65   13.50
   0  -2   4  480.85   14.20
   0  -2   4  489.75   24.90
   0  -2   4  476.05   13.90
   0   2  -5    0.80    0.50
   0   2   5    0.70    0.40
   0   2  -5   -0.10    0.60
   0   2  -5    0.40    0.80
   0   2  -5   -0.30    0.40
   0   2   5    0.30    0.50
   0   2   5   -0.20    0.60
   0   2   5    0.10    0.30
   0   2  -5   -0.10    0.40
   0   2   5    0.20    0.30
   0  -2  -5   -0.80    0.20
   0  -2   5   -0.90    0.60
   0  -2   5   -0.60    0.40
   0  -2  -5   -0.30    0.30
   0  -2   5   -0.60    0.40
   0  -2   5   -0.10    0.40
   0  -2  -5   -0.10    0.40
   0   2   6  188.58   10.00
   0   2   6  175.58    6.00
   0   2  -6  178.68    6.50
   0   2   6  182.68    5.50
   0   2  -6  181.08    5.80
   0   2  -6  183.08   10.40
   0   2   6  173.88    5.40
   0   2  -6  178.38    5.80
   0   2  -6  170.68    7.50
   0  -2   6  178.48    6.50
   0  -2  -6  181.18    5.40
   0  -2   6  180.18    7.70
   0  -2   6  177.68    5.80
   0  -2  -6  178.88    5.40
   0  -2  -6  179.58    5.80
   0   2  -7   -0.50    0.50
   0   2   7    1.00    0.40
   0   2   7    0.90    0.40
   0   2  -7   -0.30    0.60
   0   2  -7    0.20    0.50
   0   2   7    0.50    0.60
   0   2  -7    0.60    0.90
   0   2  -7   -0.10    0.40
   0   2   7   -0.40    0.40
   0  -2   7   -0.10    0.50
   0  -2  -7    0.00    0.40
   0  -2   7    0.00    0.20
   0  -2  -7    0.40    0.40
   0  -2   7   -0.10    0.50
   0  -2   7   -0.60    0.70
   0  -2  -7   -0.40    0.40
   0  -2  -7    0.00    0.40
   0   2  -8  365.76   11.20
   0   2  -8  350.96   14.00
   0   2  -8  357.26   11.10
   0   2  -8  382.16   19.60
   0   2   8  366.46   10.70
   0   2   8  355.26   13.30
   0   2   8  351.56   10.70
   0   2   8  366.66   11.60
   0   2  -8  375.16   12.20
   0  -2   8  343.07   12.10
   0  -2  -8  367.26   10.70
   0  -2   8  366.96   14.20
   0  -2   8  364.76   11.10
   0  -2  -8  373.36   10.80
   0  -2  -8  369.56   11.60
   0   2  -9    1.50    1.20
   0   2  -9    0.40    0.60
   0   2   9    0.40    0.40
   0   2  -9    0.90    0.70
   0   2   9    0.50    0.50
   0   2  -9    0.80    0.60
   0   2  -9    0.10    0.70
   0   2   9    1.40    0.50
   0   2   9    0.20    0.40
   0  -2   9    0.20    0.60
   0  -2  -9    0.50    0.40
   0  -2  -9    0.10    0.70
   0  -2   9    0.30    0.80
   0  -2  -9   -0.20    0.40
   0  -2   9   -0.30    0.60
   0  -2  -9   -0.20    0.40
   0  -2   9   -0.30    0.50
   0  -2  -9    0.60    0.50
   0   2  10  404.46   14.80
   0   2 -10  396.06   12.50
   0   2 -10  420.86   22.00
   0   2  10  401.96   12.90
   0   2 -10  395.56   15.50
   0   2  10  411.66   12.10
   0   2 -10  430.46   13.70
   0   2 -10  403.46   12.50
   0   2  10  382.66   12.10
   0  -2  10  379.96   13.60
   0  -2 -10  396.26   11.60
   0  -2 -10  419.56   13.00
   0  -2 -10  415.76   12.10
   0  -2  10  410.66   15.80
   0  -2  10  407.16   12.50
   0  -2 -10  391.06   21.20
   0  -2 -10  415.06   12.10
   0  -2  10  408.86   12.60
   0   2  11    0.00    0.50
   0   2 -11   -0.30    0.60
   0   2 -11    0.60    0.70
   0   2 -11    0.50    1.30
   0   2  11   -0.10    0.50
   0   2 -11   -0.40    0.60
   0   2  11   -0.50    0.40
   0   2 -11    0.50    0.80
   0   2  11   -0.30    0.50
   0   2 -11   -0.90    0.60
   0  -2  11    0.40    0.80
   0  -2  11   -0.20    0.60
   0  -2  11    1.00    0.70
   0  -2  11   -0.90    0.50
   0  -2 -11   -0.50    0.80
   0  -2 -11    0.50    0.60
   0  -2 -11    0.60    0.50
   0  -2  11    0.10    0.70
   0  -2 -11    0.20    0.50
   0   2 -12  129.19    9.10
   0   2  12  126.89    5.60
   0   2 -12  132.69    5.20
   0   2 -12  134.39    5.20
   0   2  12  119.69    4.70
   0   2 -12  131.79    6.10
   0   2 -12  133.89    5.20
   0   2  12  134.09    4.80
   0   2  12  130.19    4.90
   0  -2 -12  134.29    8.30
   0  -2  12  130.89    5.20
   0  -2 -12  140.09    4.90
   0  -2  12  134.89    6.40
   0  -2 -12  132.59    4.90
   0  -2  12  128.79    5.60
   0  -2 -12  127.19    4.60
   0  -2  12  142.09    5.20
   0  -2  12  128.99    4.80
   0   2 -13   -0.60    0.70
   0   2 -13    0.30    1.30
   0   2  13    0.30    0.60
   0   2  13   -1.10    0.50
   0   2  13   -0.10    0.50
   0   2  13    1.10    0.70
   0   2 -13    0.00    0.60
   0   2 -13    1.00    0.80
   0   2 -13    0.00    0.80
   0  -2  13   -0.90    0.60
   0  -2  13   -0.20    0.80
   0  -2  13   -0.60    0.70
   0  -2  13   -0.10    0.40
   0  -2  13   -0.70    0.80
   0  -2  13   -0.60    0.70
   0  -2 -13    0.50    0.60
   0  -2 -13   -0.90    0.50
   0  -2 -13    0.40    0.90
   0  -2 -13   -1.00    0.50
   0   2 -14  147.29    5.70
   0   2 -14  126.09    9.80
   0   2  14  142.89    5.30
   0   2 -14  138.39    5.60
   0   2  14  142.49    5.40
   0   2 -14  144.29    5.80
   0   2  14  129.59    6.00
   0   2 -14  135.89    6.50
   0   2  14  135.19    5.30
   0  -2 -14  143.59    5.10
   0  -2 -14  146.29    9.10
   0  -2  14  144.89    4.80
   0  -2  14  137.49    6.00
   0  -2  14  144.79    5.30
   0  -2  14  147.39    5.80
   0  -2 -14  148.29    5.40
   0  -2 -14  121.19    5.10
   0  -2  14  149.88    7.00
   0   2  15   -0.10    0.60
   0   2 -15    1.30    0.90
   0   2  15   -0.50    0.50
   0   2 -15    0.00    1.40
   0   2  15    0.00    0.70
   0   2 -15   -0.20    0.80
   0   2 -15   -0.40    0.70
   0   2 -15    0.00    0.80
   0  -2 -15   -1.00    0.60
   0  -2  15    0.10    0.80
   0  -2 -15    1.60    1.30
   0  -2  15    3.60    1.10
   0  -2 -15    1.70    0.80
   0  -2  15   -0.20    0.80
   0  -2  15    0.50    0.90
   0  -2  15    0.50    0.50
   0   2 -16   23.40    2.10
   0   2 -16   20.10    4.10
   0   2 -16   24.20    2.20
   0   2  16   24.80    1.80
   0   2  16   20.60    1.90
   0   2 -16   21.00    2.30
   0   2  16   25.50    1.90
   0  -2 -16   23.60    3.20
   0  -2 -16   26.60    1.90
   0  -2  16   22.90    1.90
   0  -2  16   25.70    2.50
   0  -2 -16   21.40    2.00
   0  -2  16   20.40    1.50
   0  -2  16   21.90    2.40
   0   2 -17   -0.10    1.60
   0   2  17    0.60    0.90
   0   2  17   -0.20    0.70
   0   2 -17    0.00    1.00
   0   2 -17    0.20    0.90
   0   2 -17    0.70    1.00
   0   2  17   -0.40    0.60
   0  -2 -17    0.80    1.20
   0  -2  17   -0.60    1.00
   0  -2  17   -0.10    0.60
   0  -2  17    0.30    0.90
   0  -2 -17   -0.40    0.70
   0  -2 -17    0.20    0.80
   0  -2  17   -0.10    0.90
   0   2 -18  108.49    4.80
   0   2  18   87.79    4.30
   0   2 -18   75.09    8.00
   0   2  18   96.79    4.30
   0   2 -18   91.99    4.70
   0   2  18   90.49    3.80
   0  -2  18   90.29    3.70
   0  -2 -18   94.99    4.20
   0  -2  18   91.09    4.20
   0  -2  18   84.19    4.70
   0  -2  18  103.49    5.60
   0  -2 -18   90.19    7.10
   0  -2 -18   90.79    4.30
   0   2 -19    0.30    1.90
   0   2  19   -0.50    0.80
   0   2  19   -0.50    0.80
   0   2 -19    0.30    1.00
   0   2 -19    0.30    1.10
   0   2  19    0.80    0.90
   0  -2 -19    2.20    1.00
   0  -2  19   -0.70    0.90
   0  -2 -19    0.00    1.30
   0  -2  19   -0.60    0.70
   0  -2  19    3.20    1.50
   0   2 -20  167.58   14.70
   0   2 -20  221.68    8.60
   0   2  20  224.18    8.20
   0   2 -20  211.08    8.30
   0   2  20  226.68    7.70
   0  -2 -20  211.98   13.70
   0  -2 -20  215.68    7.70
   0  -2  20  225.28    7.50
   0   2 -21    1.50    1.20
   0   2 -21   -0.80    1.20
   0   2  21    0.50    0.90
   0   2 -21   -1.00    1.70
   0  -2 -21   -1.10    1.30
   0  -2 -21    0.20    0.90
   0  -2  21   -0.30    0.80
   0   2  22  107.59    4.60
   0   2 -22  100.49    5.30
   0   2 -22   91.39    9.60
   0  -2 -22  102.09    4.80
   0  -2 -22   97.99    8.30
   0  -2  22  104.19    4.40
   0   2 -23    3.30    2.80
   0   2 -23    0.20    1.30
   0   2  23    3.10    1.20
   0  -2 -23   -0.20    1.80
   0   2 -24  643.04   21.60
   0   2  24  683.43   21.00
   0  -2 -24  665.43   20.10
   0  -2 -24  607.84   35.80
   0  -2  24  675.13   20.60
   0   2 -25    1.00    1.50
   0  -2 -25    1.10    2.10
   0   2  26  598.14   18.90
   0   2 -26  542.95   19.40
   0  -2  26  595.14   18.50
   0  -2 -26  561.64   32.60
   0  -2 -26  589.64   18.30
   0   2 -27    2.00    1.80
   0  -2 -27    3.40    1.50
   0  -2  27    1.60    1.20
   0   2  28   77.19    4.30
   0   2 -28   74.69    4.90
   0  -2  28   84.19    4.20
   0  -2 -28   81.29    4.80
   0   2  29    2.30    1.30
   0   2 -29   -1.20    2.00
   0  -2 -29    4.00    1.70
   0  -2  29   -0.10    1.10
   0   2  30   76.79    4.40
   0   2 -30   76.49    5.20
   0  -2 -30   88.09    5.10
   0  -2  30   81.09    4.20
   0   2  31    1.80    1.40
   0   2 -31    0.30    2.50
   0  -2 -31    0.90    1.70
   0  -2  31   -0.60    1.10
   0   2  32   74.89    4.40
   0   2 -32   60.39    5.40
   0  -2  32   72.49    4.00
   0   2  33   -0.10    1.40
   0   2 -33    4.90    3.10
   0   2  34   94.79    5.20
   0   2 -34   88.59    6.30
   0   2  35   -1.50    1.40
   0   2 -35    0.10    3.40
   0   3   0   -0.70    0.40
   0   3   0   -0.40    0.60
   0   3   0    0.60    1.00
   0   3   0    0.30    0.20
   0   3   0    0.90    0.30
   0  -3   0   -0.20    0.60
   0  -3   0   -0.10    0.50
   0  -3   0    0.10    0.20
   0  -3   0    0.40    0.50
   0   3  -1   -0.50    0.80
   0   3   1    0.10    0.70
   0   3  -1    0.00    0.30
   0   3   1   -0.20    0.80
   0   3  -1   -0.30    0.30
   0   3  -1   -0.50    0.50
   0   3   1    0.20    0.50
   0   3  -1   -0.40    0.60
   0   3  -1   -1.10    0.20
   0   3   1    0.40    0.20
   0  -3  -1    0.30    0.60
   0  -3   1   -0.30    0.80
   0  -3  -1   -0.30    0.50
   0  -3  -1    0.30    0.70
   0  -3   1   -0.30    0.30
   0  -3   1    0.00    0.60
   0  -3   1    0.80    0.30
   0   3  -2  198.78    5.90
   0   3  -2  199.18    6.00
   0   3  -2  202.08    7.10
   0   3  -2  186.08   11.50
   0   3   2  198.88    6.90
   0   3   2  187.38    8.30
   0   3  -2  185.38    8.40
   0   3  -2  206.78    6.10
   0  -3   2  188.88    5.90
   0  -3  -2  206.28    6.40
   0  -3   2  195.28    5.90
   0  -3   2  188.58    7.10
   0  -3   2  206.58    8.60
   0  -3   2  198.48    5.90
   0  -3  -2  193.28    6.90
   0   3   3   -0.20    0.70
   0   3  -3    0.10    0.40
   0   3  -3   -0.80    0.70
   0   3   3   -0.30    0.50
   0   3  -3   -0.40    0.40
   0   3  -3   -0.90    0.90
   0   3  -3   -0.80    0.60
   0  -3   3   -0.80    0.30
   0  -3   3   -1.30    0.70
   0  -3  -3    0.00    0.50
   0  -3  -3   -0.20    0.50
   0  -3   3   -0.60    0.60
   0  -3   3   -0.10    0.40
   0  -3   3   -0.30    0.40
   0   3   4  207.28    5.80
   0   3   4  202.88    8.50
   0   3  -4  200.28    6.40
   0   3   4  204.58    5.80
   0   3  -4  193.28    8.80
   0   3  -4  198.68   12.00
   0   3  -4  214.08    7.50
   0   3  -4  211.48    6.40
   0   3   4  208.28    7.10
   0  -3   4  200.18    6.30
   0  -3   4  205.68    8.90
   0  -3  -4  204.08    6.60
   0  -3   4  203.78    6.10
   0  -3   4  201.58    6.00
   0  -3   4  201.98    7.50
   0  -3   4  215.58    6.40
   0   3   5    0.70    0.50
   0   3  -5    0.50    1.10
   0   3   5    0.40    0.50
   0   3  -5    0.30    0.70
   0   3   5    0.30    0.30
   0   3  -5   -0.40    0.80
   0   3   5    0.60    0.70
   0   3  -5   -0.70    0.40
   0   3  -5   -0.20    0.50
   0   3   5    0.20    0.30
   0  -3  -5    0.40    0.30
   0  -3  -5    0.80    0.60
   0  -3   5   -0.60    0.40
   0  -3  -5    0.40    0.30
   0  -3  -5    0.30    0.20
   0  -3   5    0.70    0.80
   0  -3   5   -0.50    0.80
   0  -3   5    0.00    0.50
   0  -3   5    0.10    0.50
   0  -3   5   -0.60    0.40
   0   3  -6  194.88    8.60
   0   3   6  197.48    8.20
   0   3   6  189.28    6.80
   0   3  -6  197.88   11.80
   0   3   6  195.88    6.80
   0   3  -6  196.08    7.30
   0   3  -6  202.08    6.40
   0   3  -6  206.28    6.50
   0   3   6  197.38    5.80
   0   3   6  195.78    5.90
   0  -3  -6  200.38    6.50
   0  -3  -6  199.68    5.80
   0  -3  -6  195.68    5.70
   0  -3   6  197.18    6.30
   0  -3   6  199.08    6.40
   0  -3   6  189.88    7.40
   0  -3   6  193.38    6.10
   0  -3  -6  195.78    5.60
   0  -3   6  197.58    8.80
   0   3  -7   -0.40    0.80
   0   3   7    0.30    0.60
   0   3   7    0.90    0.60
   0   3  -7    0.50    1.10
   0   3   7    0.00    0.70
   0   3  -7    0.00    0.60
   0   3  -7    1.00    0.60
   0   3   7    0.10    0.40
   0   3   7   -0.40    0.40
   0   3  -7    0.20    0.70
   0  -3  -7   -0.10    0.40
   0  -3   7   -0.40    0.40
   0  -3   7    0.50    1.10
   0  -3  -7    0.30    0.60
   0  -3   7    0.00    0.70
   0  -3  -7    0.30    0.40
   0  -3   7   -0.60    0.50
   0  -3   7   -0.40    0.60
   0   3   8   18.00    1.20
   0   3   8   20.00    1.80
   0   3  -8   17.80    2.00
   0   3   8   18.90    1.10
   0   3   8   19.90    1.40
   0   3  -8   18.40    1.50
   0   3   8   18.30    1.40
   0   3  -8   18.70    1.50
   0   3  -8   20.00    2.80
   0  -3   8   14.40    1.70
   0  -3   8   17.40    1.40
   0  -3   8   18.60    2.40
   0  -3   8   17.70    1.50
   0  -3   8   15.50    1.30
   0  -3  -8   21.90    1.60
   0  -3  -8   17.90    1.20
   0  -3  -8   18.50    1.10
   0   3  -9    0.30    0.70
   0   3   9    1.30    0.50
   0   3  -9    1.60    1.10
   0   3   9    1.40    0.60
   0   3  -9   -0.70    1.10
   0   3  -9   -0.40    0.60
   0   3   9   -0.10    0.50
   0   3   9    0.20    0.70
   0  -3   9    0.50    1.10
   0  -3   9   -0.80    0.60
   0  -3   9   -0.20    0.70
   0  -3  -9    0.60    0.70
   0  -3  -9   -0.60    0.40
   0  -3   9   -1.10    0.50
   0  -3  -9    0.90    0.50
   0   3  10  439.66   12.70
   0   3 -10  429.76   23.40
   0   3  10  439.76   16.00
   0   3 -10  406.16   16.90
   0   3  10  448.16   13.90
   0   3 -10  428.26   13.30
   0   3  10  419.86   12.70
   0   3 -10  434.86   13.30
   0  -3  10  435.96   12.70
   0  -3 -10  435.46   12.70
   0  -3 -10  428.36   12.30
   0  -3  10  424.76   17.20
   0  -3  10  421.56   14.80
   0   3 -11    0.30    1.20
   0   3  11    0.70    0.60
   0   3 -11   -0.40    1.00
   0   3  11    0.50    0.60
   0   3 -11    0.40    0.80
   0   3  11   -0.40    0.50
   0   3  11    0.80    0.60
   0   3 -11    0.10    0.70
   0  -3 -11    0.10    0.60
   0  -3 -11    0.30    0.60
   0  -3  11   -0.40    0.40
   0  -3  11    0.30    0.80
   0  -3  11    0.00    0.70
   0  -3  11    0.60    1.10
   0  -3 -11    0.60    0.60
   0   3  12  687.53   20.90
   0   3 -12  736.83   22.10
   0   3  12  729.13   22.60
   0   3  12  736.13   20.90
   0   3 -12  691.13   21.50
   0   3 -12  729.43   37.90
   0   3 -12  689.13   27.00
   0   3  12  734.33   26.00
   0  -3 -12  739.83   20.90
   0  -3 -12  703.53   20.20
   0  -3 -12  756.82   22.70
   0  -3  12  690.53   23.60
   0  -3  12  743.03   27.60
   0  -3  12  733.63   20.60
   0   3 -13   -0.40    0.70
   0   3 -13   -0.60    1.30
   0   3  13   -0.10    0.60
   0   3 -13    1.00    0.80
   0   3  13    0.60    0.60
   0   3  13    0.50    0.60
   0   3  13    0.10    0.60
   0  -3  13    1.20    1.00
   0  -3 -13   -0.70    0.70
   0  -3  13    0.30    0.80
   0  -3 -13    0.20    0.70
   0  -3  13    0.60    1.10
   0   3 -14  613.64   34.00
   0   3 -14  623.24   19.90
   0   3  14  636.64   20.00
   0   3 -14  622.34   19.30
   0   3  14  599.94   18.70
   0   3  14  659.03   23.10
   0  -3  14  636.54   24.60
   0  -3 -14  684.03   20.20
   0  -3  14  615.54   21.10
   0  -3 -14  611.24   18.00
   0  -3  14  631.04   18.40
   0   3  15   -1.00    0.70
   0   3  15    0.00    0.80
   0   3 -15    0.60    1.60
   0   3 -15    0.00    1.00
   0   3 -15    0.20    0.90
   0  -3  15    1.40    1.00
   0  -3 -15   -0.50    0.70
   0  -3  15   -0.10    1.10
   0  -3 -15   -0.10    0.80
   0   3 -16  411.66   25.00
   0   3  16  437.56   13.70
   0   3 -16  438.36   14.20
   0   3 -16  440.66   14.70
   0  -3  16  434.06   13.50
   0  -3 -16  445.76   13.20
   0   3 -17    0.70    1.80
   0   3 -17    1.70    1.10
   0   3 -17   -0.10    1.00
   0   3  17    0.90    0.90
   0  -3 -17    0.40    0.80
   0  -3  17   -1.50    0.90
   0  -3 -17    0.10    1.30
   0   3 -18  290.87   10.40
   0   3 -18  252.07   17.70
   0   3 -18  277.07    9.90
   0  -3 -18  267.67   16.40
   0  -3  18  270.97    9.40
   0  -3 -18  287.17    9.20
   0   3 -19   -1.10    0.90
   0   3 -19    0.60    1.00
   0   3 -19    0.60    2.10
   0  -3 -19    0.90    1.60
   0  -3  19   -0.60    1.00
   0  -3 -19   -0.80    1.00
   0   3 -20  201.98   16.50
   0   3 -20  248.58    9.70
   0   3 -20  254.27    9.40
   0  -3 -20  237.08   15.30
   0  -3  20  273.57    9.10
   0  -3 -20  262.57    8.70
   0   3 -21    0.00    1.20
   0   3 -21    0.60    2.40
   0   3 -21    3.40    1.50
   0  -3 -21    0.10    1.10
   0  -3 -21    0.40    1.60
   0  -3  21    2.70    1.40
   0   3 -22  210.38    8.80
   0  -3  22  214.58    8.10
   0  -3 -22  215.88    7.90
   0  -3 -22  193.48   13.70
   0   3 -23   -1.60    1.10
   0  -3 -23    0.40    1.70
   0  -3 -23    1.00    1.20
   0   3 -24  128.69    6.50
   0  -3 -24  141.59    6.00
   0  -3 -24  125.19   10.20
   0   3 -25    1.10    1.50
   0  -3 -25    1.80    1.30
   0   3 -26   42.90    3.60
   0  -3 -26   41.70    3.30
   0   3 -27   -2.30    1.40
   0  -3 -27    0.50    1.30
   0   3 -28   79.99    5.20
   0  -3 -28   79.79    4.70
   0   3 -29   -3.00    1.70
   0  -3 -29    0.30    1.40
   0   3 -30    0.60    2.20
   0  -3 -30    5.30    1.90
   0   3 -31   -1.80    2.20
   0  -3 -31    0.30    1.60
   0   3 -32   23.20    3.70
   0  -3 -32   29.10    3.60
   0   3  33   -0.10    1.50
   0   3 -33   -1.40    2.80
   0  -3 -33    1.30    1.90
   0   3  34   16.90    2.60
   0   3 -34   22.80    4.00
   0  -3 -34   19.30    3.10
   0   4   0  294.67   12.60
   0   4   0  314.47   10.60
   0   4   0  312.47    8.70
   0   4   0  308.37    8.60
   0   4   0  290.27   17.30
   0  -4   0  295.47    8.40
   0  -4   0  291.27   10.50
   0  -4   0  313.87   12.80
   0  -4   0  309.97    9.60
   0   4  -1   -1.20    0.70
   0   4  -1    0.10    1.20
   0   4  -1    1.20    0.40
   0   4   1   -0.50    0.70
   0   4   1    0.20    1.00
   0   4  -1   -0.10    0.40
   0   4   1   -0.70    1.10
   0   4  -1   -1.80    0.90
   0  -4   1    0.20    0.80
   0  -4   1    0.00    0.40
   0  -4   1    1.00    1.10
   0  -4  -1    0.40    0.70
   0  -4  -1    0.10    0.30
   0  -4  -1    0.40    0.80
   0  -4   1    0.50    0.30
   0  -4   1   -0.60    0.70
   0   4  -2  128.79    4.10
   0   4   2  121.49    8.60
   0   4  -2  122.49    8.70
   0   4   2  130.79    5.20
   0   4  -2  124.59    4.00
   0   4   2  121.99    6.30
   0   4  -2  129.79    5.30
   0   4  -2  124.79    6.50
   0  -4   2  130.29    4.00
   0  -4  -2  117.09    5.10
   0  -4   2  131.99    6.60
   0  -4  -2  131.09    4.70
   0  -4   2  124.19    5.30
   0  -4   2  124.09    3.90
   0   4  -3   -0.80    1.10
   0   4  -3    0.10    1.20
   0   4  -3   -0.70    0.50
   0   4  -3   -0.80    0.50
   0   4   3    3.30    1.30
   0   4   3    0.70    0.90
   0  -4  -3   -0.40    0.70
   0  -4   3   -1.00    0.50
   0  -4   3   -1.70    1.00
   0  -4   3   -0.30    0.50
   0  -4  -3    1.00    0.90
   0  -4   3    0.40    0.90
   0   4  -4  215.58   10.00
   0   4  -4  220.28    6.90
   0   4   4  222.28    8.10
   0   4   4  213.98    9.70
   0   4  -4  231.68    7.00
   0   4  -4  212.88   13.50
   0  -4  -4  231.68    7.40
   0  -4   4  227.78   10.20
   0  -4   4  225.28    6.90
   0  -4   4  228.18    8.50
   0  -4   4  225.98    6.70
   0   4  -5   -0.40    1.40
   0   4   5    0.50    1.10
   0   4  -5   -1.40    0.60
   0   4  -5   -1.20    0.60
   0   4   5    0.10    0.80
   0   4   5   -0.20    0.80
   0  -4  -5    0.90    0.70
   0  -4   5   -1.00    1.20
   0  -4   5   -1.30    0.60
   0  -4   5    1.90    1.00
   0  -4   5   -0.40    0.60
   0  -4  -5    0.00    0.30
   0  -4  -5    0.20    0.30
   0   4   6  233.58    9.80
   0   4   6  218.58    6.50
   0   4  -6  227.28    7.30
   0   4  -6  218.18   13.70
   0   4  -6  229.88    7.30
   0   4   6  229.48    8.10
   0   4   6  223.28    8.10
   0  -4   6  224.28    7.00
   0  -4   6  232.58   10.50
   0  -4   6  228.78    6.80
   0  -4  -6  229.38    7.60
   0  -4   6  225.18    8.70
   0  -4  -6  222.18    6.40
   0  -4   6  228.38    7.30
   0   4   7   -0.10    0.70
   0   4   7    1.70    1.10
   0   4   7    0.30    0.40
   0   4  -7   -0.80    0.60
   0   4  -7    0.20    1.40
   0   4  -7   -0.90    0.70
   0   4   7    0.30    0.80
   0   4   7    0.00    0.40
   0  -4   7   -0.30    0.50
   0  -4  -7   -0.10    0.70
   0  -4  -7   -0.40    0.50
   0  -4   7   -0.60    0.60
   0  -4   7    0.60    1.00
   0  -4   7   -1.10    1.20
   0  -4   7   -0.50    0.70
   0   4   8  431.16   16.80
   0   4   8  432.36   14.10
   0   4   8  430.86   12.30
   0   4   8  433.96   12.30
   0   4  -8  421.16   13.10
   0   4   8  442.66   14.10
   0   4  -8  403.26   23.70
   0  -4  -8  444.46   13.30
   0  -4  -8  421.46   12.00
   0  -4   8  427.06   15.00
   0  -4   8  431.16   12.60
   0  -4   8  435.66   13.00
   0   4  -9    0.10    0.70
   0   4   9    0.20    0.70
   0   4   9   -0.20    0.50
   0   4   9   -0.70    0.60
   0   4   9    0.10    0.90
   0   4  -9    0.10    1.40
   0   4   9   -0.20    0.40
   0  -4  -9    0.10    0.50
   0  -4   9    1.30    0.80
   0  -4  -9    0.40    0.60
   0  -4  -9   -0.30    0.70
   0  -4   9    2.10    1.10
   0  -4   9    0.20    0.60
   0   4 -10   75.19    6.50
   0   4  10   76.19    4.40
   0   4  10   79.39    2.90
   0   4 -10   79.89    3.60
   0   4  10   73.99    2.90
   0   4  10   75.29    3.50
   0   4  10   80.19    3.50
   0  -4  10   79.29    3.30
   0  -4 -10   76.59    2.90
   0  -4  10   79.49    3.40
   0  -4 -10   74.19    3.50
   0  -4 -10   80.09    2.90
   0  -4  10   75.09    4.20
   0   4 -11    0.00    0.80
   0   4  11    0.50    0.70
   0   4 -11   -0.90    1.30
   0   4  11    0.30    0.70
   0   4  11   -0.10    0.90
   0   4  11   -0.40    0.50
   0   4  11    0.30    0.50
   0  -4  11    0.00    0.60
   0  -4 -11    0.00    0.60
   0  -4  11    0.30    0.80
   0  -4  11    0.20    1.00
   0   4 -12  126.19    9.30
   0   4 -12  124.89    5.20
   0   4  12  121.99    4.60
   0   4  12  131.19    5.80
   0  -4  12  135.39    5.10
   0  -4  12  133.49    5.00
   0  -4 -12  124.09    4.50
   0   4  13   -0.20    0.60
   0   4 -13    0.70    1.70
   0   4 -13   -0.60    0.80
   0  -4  13    0.10    0.70
   0  -4 -13    0.60    0.70
   0  -4  13   -0.20    0.90
   0   4 -14   24.50    4.30
   0   4 -14   22.60    2.30
   0  -4  14   23.50    2.20
   0  -4 -14   23.90    1.80
   0   4 -15   -0.30    1.60
   0  -4 -15   -0.40    0.80
   0  -4  15   -0.30    1.00
   0   4 -16   15.70    1.90
   0   4 -16   14.70    3.60
   0  -4 -16   14.10    1.60
   0  -4  16   14.60    1.90
   0   4 -17    0.60    1.00
   0   4 -17   -0.90    1.80
   0  -4  17    1.00    1.10
   0  -4 -17   -0.10    0.90
   0   4 -18    1.60    1.30
   0   4 -18    0.20    2.00
   0  -4  18    1.20    1.20
   0  -4 -18   -0.70    1.00
   0   4 -19    0.40    1.20
   0  -4  19    1.40    1.30
   0  -4 -19   -1.40    1.00
   0   4 -20    3.70    1.50
   0  -4  20    2.40    1.40
   0  -4 -20    4.20    1.40
   0   4 -21   -0.80    1.30
   0  -4  21   -0.20    1.40
   0  -4 -21   -1.90    1.00
   0   4 -22   15.50    2.50
   0  -4 -22   18.10    2.30
   0  -4  22   17.90    2.40
   0   4 -23    0.40    1.40
   0  -4 -23    0.70    1.20
   0  -4  23    1.00    1.40
   0   4 -24   42.80    3.80
   0  -4 -24   46.70    3.40
   0  -4  24   48.80    3.70
   0   4 -25    0.30    1.40
   0  -4 -25   -0.10    1.30
   0   4 -26   82.69    5.40
   0  -4 -26   94.19    5.00
   0   4 -27   -0.10    1.60
   0  -4 -27    2.40    1.60
   0   4 -28   62.59    4.80
   0  -4 -28   67.79    4.40
   0   4 -29    0.50    1.90
   0  -4 -29    1.90    1.60
   0   4 -30   60.19    5.00
   0  -4 -30   77.19    4.90
   0   4 -31   -1.20    2.20
   0  -4 -31    0.50    1.60
   0   4 -32   47.60    4.90
   0  -4 -32   62.29    4.50
   0   4 -33   -0.50    2.80
   0   5   0   10.20    2.70
   0  -5   0   11.00    0.90
   0  -5   0   12.80    1.80
   0  -5   0   11.90    1.50
   0  -5   0   10.90    0.90
   0   5  -1    0.10    0.40
   0   5  -1   -0.10    0.30
   0   5  -1   -0.10    1.60
   0   5   1   -0.30    1.30
   0  -5  -1    0.20    0.40
   0  -5  -1    0.30    0.80
   0  -5   1    0.00    0.90
   0  -5   1   -0.10    0.50
   0  -5  -1   -1.40    0.70
   0  -5  -1    0.50    0.40
   0  -5   1    0.40    0.50
   0  -5   1    0.20    0.80
   0   5  -2    1.30    0.50
   0   5  -2    1.00    1.60
   0   5   2    0.50    1.60
   0   5  -2    0.40    0.50
   0  -5  -2    1.80    0.90
   0  -5   2    2.10    1.10
   0  -5  -2    0.80    0.40
   0  -5   2    0.70    0.80
   0  -5  -2    1.60    1.00
   0  -5   2    0.40    0.50
   0   5   3    0.30    1.50
   0   5  -3   -0.30    0.40
   0   5  -3    0.70    1.60
   0   5  -3   -0.80    0.50
   0  -5   3    0.40    0.90
   0  -5   3   -1.20    0.50
   0  -5  -3    3.10    1.00
   0  -5   3    0.10    1.00
   0   5  -4   82.29    7.40
   0   5  -4   98.09    3.50
   0   5   4   90.69    7.60
   0   5  -4   92.69    3.40
   0  -5  -4   97.49    4.10
   0  -5   4   94.69    4.80
   0  -5   4   90.19    3.40
   0   5  -5    0.60    0.70
   0   5  -5   -0.20    1.60
   0  -5  -5    0.40    0.40
   0  -5  -5   -0.20    0.80
   0  -5   5    0.30    0.80
   0  -5   5    0.80    1.20
   0   5  -6  318.17   19.20
   0   5   6  323.37   11.40
   0   5  -6  327.57   10.00
   0  -5   6  318.77    9.70
   0  -5  -6  319.97    9.00
   0  -5  -6  323.97   10.50
   0  -5   6  316.97   12.00
   0  -5  -6  332.97    8.90
   0   5  -7    1.00    1.80
   0   5  -7    0.30    0.80
   0   5   7   -0.40    0.90
   0  -5  -7   -0.80    0.50
   0  -5  -7    0.00    0.90
   0  -5  -7    0.20    0.50
   0  -5   7   -0.30    0.90
   0   5  -8  135.49    9.90
   0  -5   8  131.79    4.90
   0  -5  -8  137.89    5.30
   0  -5  -8  127.29    4.10
   0   5   9    0.00    0.40
   0   5  -9    1.70    2.10
   0  -5  -9   -0.10    0.60
   0  -5  -9    1.10    1.00
   0  -5   9   -2.10    0.80
   0  -5   9   -0.20    0.50
   0   5 -10  168.58   12.10
   0   5  10  180.48    5.40
   0   5  10  174.18    5.50
   0  -5  10  179.78    6.30
   0  -5 -10  177.38    5.50
   0  -5 -10  174.08    6.60
   0   5 -11    0.90    2.00
   0  -5 -11    0.10    0.70
   0  -5 -11   -0.10    0.90
   0  -5  11   -1.00    0.90
   0   5 -12  100.99    8.50
   0  -5  12   97.29    4.30
   0  -5 -12   99.59    3.70
   0   5 -13    1.00    2.00
   0  -5 -13    0.30    0.80
   0  -5  13    0.50    1.10
   0   5 -14  316.67   19.10
   0  -5 -14  294.77    9.30
   0  -5  14  296.27   10.00
   0  -5 -15   -0.80    0.90
   0  -5  15   -0.40    1.20
   0  -5  16  275.07    9.50
   0  -5 -16  268.07    8.80
   0  -5  17   -1.00    1.20
   0  -5 -17   -1.00    1.00
   0  -5 -18  120.89    5.00
   0  -5  18  122.89    5.50
   0  -5 -19   -0.30    1.00
   0  -5  19    0.00    1.30
   0  -5 -20   70.89    3.80
   0  -5  20   79.19    4.40
   0  -5  21    2.30    1.50
   0  -5 -21    0.60    1.10
   0   5 -22   47.70    3.90
   0  -5  22   53.49    3.70
   0  -5 -22   42.10    3.10
   0   5 -23   -0.20    1.50
   0  -5 -23    0.00    1.20
   0  -5  23    0.10    1.40
   0   5 -24   21.50    3.10
   0  -5 -24   25.60    2.80
   0  -5  24   25.80    3.10
   0   5 -25    1.90    1.80
   0  -5  25    0.20    1.50
   0  -5 -25    0.30    1.30
   0   5 -26   18.80    3.00
   0  -5  26   18.60    2.80
   0  -5 -26   21.90    2.70
   0   5 -27    0.80    1.70
   0  -5 -27   -0.50    1.30
   0   5 -28    2.80    2.00
   0  -5 -28    1.60    1.50
   0   5 -29    1.30    1.90
   0  -5 -29    0.50    1.50
   0   5 -30    4.90    2.40
   0  -5 -30    4.80    2.00
   0   5 -31   -1.30    1.90
   0   6   0    9.00    3.20
   0  -6   0    7.00    0.80
   0   6   1   -0.40    1.90
   0   6  -1    1.50    2.10
   0  -6  -1    0.20    1.20
   0  -6   1   -0.30    0.60
   0  -6  -1    0.80    0.50
   0   6  -2  120.69    9.90
   0   6   2  122.19    9.90
   0  -6  -2  123.49    3.80
   0  -6   2  124.39    4.20
   0  -6  -2  123.39    5.80
   0   6  -3    0.90    2.30
   0   6   3   -2.10    2.10
   0  -6  -3   -0.30    0.50
   0  -6   3   -0.80    0.80
   0   6   4  480.65   28.30
   0   6  -4  500.25   28.50
   0  -6   4  515.05   14.30
   0   6   5   -2.10    2.00
   0   6  -5    1.40    2.40
   0  -6  -5    0.10    1.10
   0  -6   5   -0.80    0.90
   0   6   6  232.88   15.70
   0   6  -6  236.98   15.80
   0  -6  -6  246.98    8.50
   0  -6   6  242.58    7.70
   0  -6  -6  236.48    6.80
   0   6  -7   -0.80    2.20
   0   6   7   -1.60    1.60
   0  -6  -7   -1.30    0.50
   0  -6  -7   -0.80    1.10
   0  -6   7    0.70    1.00
   0   6  -8   30.60    4.70
   0  -6  -8   25.90    1.40
   0  -6  -8   25.30    2.40
   0  -6   8   28.50    2.10
   0  -6  -9    0.10    1.10
   0  -6  -9    0.30    0.60
   0  -6   9    0.50    0.90
   0  -6 -10   10.80    1.70
   0  -6  10    8.10    1.40
   0  -6 -10    9.80    1.00
   0  -6  11    0.30    1.00
   0  -6 -11    1.10    0.70
   0  -6 -11    1.80    1.20
   0  -6 -12   12.30    1.30
   0  -6  12   12.40    1.80
   0  -6 -12   12.80    2.00
   0  -6  13    0.50    1.10
   0  -6 -13    0.70    0.80
   0  -6 -14   19.30    1.80
   0  -6  14   17.30    2.10
   0  -6 -15    0.30    0.80
   0  -6  15    1.10    1.10
   0  -6 -16   23.70    2.10
   0  -6  16   21.10    2.40
   0  -6  17    1.10    1.30
   0  -6 -17    0.50    1.00
   0  -6  18   30.80    3.00
   0  -6 -18   35.80    2.50
   0  -6  19   -0.20    1.30
   0  -6 -19   -1.10    1.10
   0  -6  20   66.89    4.30
   0  -6 -20   76.19    4.00
   0  -6 -21   -1.30    1.20
   0  -6  21    0.20    1.50
   0  -6 -22   48.90    3.40
   0  -6  22   47.80    3.70
   0  -6 -23   -0.60    1.30
   0  -6  23    0.60    1.50
   0  -6 -24    3.50    1.60
   0  -6  24   -0.30    1.50
   0  -6  25   -0.70    1.50
   0  -6 -25   -0.70    1.20
   0   6 -26   11.10    2.70
   0  -6 -26   11.70    2.20
   0  -6  26   10.60    2.40
   0   6 -27    1.00    2.00
   0  -6 -27   -0.40    1.40
   0  -6  27    2.20    2.00
   0   6 -28   74.69    5.60
   0  -6 -28   71.49    4.70
   0  -7   0    0.40    0.70
   0  -7   1   -0.50    0.70
   0  -7  -1   -0.10    0.60
   0  -7  -2   29.50    1.50
   0  -7   2   29.40    1.90
   0  -7   3   -0.10    0.80
   0  -7   4   23.10    1.80
   0  -7   5   -0.50    0.90
   0  -7   6  177.78    6.20
   0  -7   7    0.80    1.10
   0  -7   8  140.49    5.50
   0  -7  -9   -0.30    0.60
   0  -7   9    0.00    1.10
   0  -7  10   97.39    4.40
   0  -7 -10   91.29    3.30
   0  -7  11   -0.80    1.10
   0  -7 -11   -1.20    0.60
   0  -7 -12    5.60    1.00
   0  -7  12    2.20    1.30
   0  -7  13    0.10    1.10
   0  -7 -13    1.30    0.80
   0  -7 -14   63.39    2.90
   0  -7  14   61.89    3.70
   0  -7  15    0.00    1.30
   0  -7 -15    0.30    0.90
   0  -7 -16   98.39    4.20
   0  -7  16  100.99    5.00
   0  -7 -17    1.80    1.20
   0  -7  17   -0.20    1.50
   0  -7 -18   53.09    3.10
   0  -7  18   54.19    3.80
   0  -7  19    1.70    1.50
   0  -7 -19    1.50    1.30
   0  -7  20   26.10    3.00
   0  -7 -20   28.20    2.60
   0  -7  21    0.60    1.50
   0  -7 -21   -0.60    1.20
   0  -7 -22    6.60    1.80
   0  -7  22    6.20    1.90
   0  -7  23    0.40    1.60
   0  -7 -23    2.10    1.60
   0  -7 -24    7.90    1.90
   0  -7  24    7.90    2.30
   0  -8   0   13.00    1.30
   0  -8   1    0.20    0.90
   0  -8  -1   -0.60    0.70
   0  -8   2   67.19    3.00
   0  -8   3   -1.60    1.00
   0  -8   4  114.59    4.50
   0  -8   5    0.50    1.10
   0  -8   6   52.99    3.00
   0  -8   7   -0.20    1.00
   0  -8   8   18.10    2.00
   0  -8   9   -0.70    1.10
   0  -8  10    6.20    1.50
   0  -8  11    1.80    1.30
   0  -8  12   22.90    2.50
   0  -8 -12   19.30    1.50
   0  -8  13   -0.30    1.30
   0  -8 -13    0.10    0.80
   0  -8  14    4.40    1.60
   0  -8 -14    5.70    1.10
   0  -8  15    0.60    1.40
   0  -8 -15    0.90    0.90
   0  -8 -16   32.00    2.20
   0  -8  16   29.10    3.10
   0  -8 -17   -0.40    1.00
   0  -8  17    1.50    1.50
   0  -8 -18   25.10    2.20
   0  -8  18   28.50    3.10
   0  -8  19   -0.50    1.60
   0  -8 -19    0.50    1.20
   0  -9   0    1.50    0.90
   0  -9   1    0.10    0.90
   0  -9   2    9.00    1.30
   0  -9   3    1.30    1.00
   0  -9   4   11.20    1.50
   0  -9   5   -1.30    1.00
   0  -9   6   29.50    2.30
   0  -9   7    0.30    1.20
   0  -9   8   58.49    3.50
   0  -9   9    0.50    1.30
   0  -9  10   65.89    3.80
   0  -9  11   -1.70    1.30
  -1   0  36   -1.00    1.30
  -1   0  35   -0.90    1.30
  -1   0  34   -0.50    1.30
  -1   0  33    0.00    1.30
  -1   0  32    0.00    1.20
  -1   0  31   -0.80    1.20
  -1   0  30   -0.60    1.10
  -1   0  29   -0.60    1.10
  -1   0  28    1.70    1.20
  -1   0  27   -4.00    1.10
   1   0 -26    4.00    3.60
  -1   0  26    2.30    1.50
  -1   0  25   -0.50    1.20
   1   0 -25   -3.30    1.80
   1   0 -25    3.10    3.60
   1   0 -24    2.40    2.80
   1   0 -24   -2.80    1.50
  -1   0  24   -0.30    1.30
  -1   0  23   -1.00    1.00
   1   0 -23   -3.70    1.30
   1   0 -23    0.90    2.50
  -1   0  23   -0.80    1.20
   1   0 -22   -0.70    1.00
  -1   0  22   -0.10    1.20
  -1   0  22   -0.90    0.80
   1   0 -22   -0.80    1.20
   1   0 -22    0.10    2.10
  -1   0  22    0.60    1.00
  -1   0  21   -1.40    0.70
  -1   0  21   -0.70    1.10
   1   0 -21    1.50    1.10
  -1   0  21   -0.70    0.80
   1   0 -21    0.20    2.00
   1   0 -21   -0.60    1.10
   1   0 -20   -0.70    1.80
   1   0 -20    0.00    0.90
  -1   0  20   -0.60    0.80
  -1   0  20   -0.90    0.80
   1   0 -20   -0.30    0.80
  -1   0  20    0.20    0.80
  -1   0  19    0.40    0.80
   1   0 -19    0.00    1.80
   1   0 -19   -0.20    0.90
  -1   0  19   -0.90    0.60
   1   0 -19    0.30    0.80
  -1   0  19   -0.50    0.80
  -1   0  19   -1.70    0.70
   1   0 -18   -0.80    0.80
  -1   0  18    0.10    0.80
   1   0 -18   -1.00    1.30
   1   0 -18    0.30    0.80
  -1   0  18    0.50    0.90
  -1   0  18   -0.80    0.80
   1   0 -18    2.90    1.20
  -1   0  18   -0.40    0.70
   1   0 -18   -2.00    0.70
  -1   0  17   -0.50    0.80
   1   0 -17   -0.80    1.30
  -1   0  17    0.40    0.80
   1   0 -17   -0.50    0.70
  -1   0  17    0.20    0.70
   1   0 -17   -0.50    0.80
  -1   0  17   -0.70    0.70
  -1   0  17    0.00    0.60
   1   0 -17   -1.10    0.60
   1   0 -17    0.40    0.90
  -1   0  16   -0.20    0.60
   1   0 -16    0.10    1.40
  -1   0  16   -0.50    0.60
   1   0 -16    0.10    0.70
  -1   0  16    0.70    0.70
   1   0 -16   -0.60    0.70
  -1   0  16   -1.70    0.60
   1   0 -16   -0.10    0.80
   1   0 -16    0.40    0.70
   1   0 -16   -0.10    0.80
  -1   0  16    0.10    0.70
   1   0 -16    1.20    0.80
  -1   0  15   -0.40    0.60
   1   0 -15   -0.60    1.40
  -1   0  15   -1.00    0.50
  -1   0  15    1.20    0.80
  -1   0  15   -0.30    0.60
   1   0 -15    0.50    0.70
   1   0 -15    0.50    0.70
   1   0 -15   -1.20    0.70
   1   0 -15    0.00    0.70
   1   0 -15   -0.10    0.80
  -1   0  15   -0.60    0.50
  -1   0  14   -0.60    0.60
  -1   0  14    0.80    0.70
   1   0 -14    0.80    1.50
  -1   0  14   -1.10    0.70
   1   0 -14    0.60    0.80
  -1   0  14    0.10    0.60
   1   0 -14   -0.50    0.60
   1   0 -14   -0.10    0.80
   1   0 -14    0.30    0.70
  -1   0  14   -0.10    0.70
   1   0 -14   -1.30    0.60
   1   0 -13   -0.20    0.70
   1   0 -13    1.00    0.70
  -1   0  13   -0.40    0.60
  -1   0  13    0.50    0.70
  -1   0  13   -0.50    0.60
  -1   0  13   -1.00    0.40
   1   0 -13    0.20    1.60
  -1   0  13    0.60    0.60
   1   0 -13    0.40    0.80
   1   0 -13    0.50    0.60
   1   0 -13    0.90    0.90
   1   0 -12    0.90    0.60
   1   0 -12   -0.90    0.60
   1   0 -12    0.30    1.20
   1   0 -12    0.50    0.60
  -1   0  12    0.00    0.50
  -1   0  12   -0.60    0.40
   1   0 -12   -1.20    0.50
  -1   0  12    0.10    0.50
   1   0 -12    0.60    0.60
  -1   0  12   -0.30    0.60
  -1   0  12   -0.10    0.60
   1   0 -11   -0.40    1.00
   1   0 -11   -0.60    0.40
  -1   0  11    0.80    0.60
  -1   0  11   -0.30    0.40
   1   0 -11    0.10    0.50
  -1   0  11    0.30    0.50
   1   0 -11    0.40    0.60
   1   0 -11    0.20    0.50
   1   0 -11   -0.50    0.50
  -1   0  11    0.30    0.50
  -1   0  11    0.50    0.60
   1   0 -10    0.10    0.50
  -1   0  10   -0.40    0.40
   1   0 -10   -0.60    0.50
  -1   0  10    0.00    0.50
  -1   0  10    0.60    0.50
  -1   0  10    0.10    0.50
   1   0 -10   -0.30    0.50
   1   0 -10    0.00    0.50
   1   0 -10   -0.40    0.90
  -1   0   9    0.00    0.40
  -1   0   9    0.10    0.50
  -1   0   9   -0.60    0.80
   1   0  -9    0.40    0.40
  -1   0   9   -0.20    0.40
   1   0  -9    0.30    0.50
   1   0  -9    0.20    0.50
   1   0  -9   -0.10    0.80
   1   0  -9    0.60    0.50
  -1   0   9   -0.20    0.40
   1   0  -8    0.10    0.40
  -1   0   8    0.20    0.40
   1   0  -8    0.90    0.40
  -1   0   8   -0.40    0.70
  -1   0   8    0.40    0.40
  -1   0   8    0.30    0.40
   1   0  -8    0.40    0.50
   1   0  -8   -0.40    0.80
   1   0  -8   -0.10    0.40
  -1   0   8    0.20    0.40
   1   0  -7   -0.60    0.40
  -1   0   7   -0.20    0.40
   1   0  -7   -0.70    0.40
   1   0  -7   -0.80    0.40
  -1   0   7   -0.80    0.40
   1   0  -7   -0.50    0.40
  -1   0   7   -0.10    0.50
  -1   0   7   -0.90    0.70
   1   0  -7   -1.00    0.80
  -1   0   7    0.50    0.50
   1   0  -6   -0.30    0.40
  -1   0   6   -0.50    0.40
   1   0  -6   -0.70    0.30
  -1   0   6   -0.80    0.60
  -1   0   6   -0.30    0.40
   1   0  -6    0.00    0.80
   1   0  -6    0.10    0.40
   1   0  -6   -0.80    0.40
  -1   0   6   -0.60    0.40
  -1   0   6   -0.70    0.30
  -1   0   5    0.40    0.30
   1   0  -5    0.30    0.30
  -1   0   5    0.40    0.30
   1   0  -5    1.30    0.40
  -1   0   5   -0.20    0.50
  -1   0   5    0.30    0.30
   1   0  -5    0.10    0.50
  -1   0   5    0.50    0.30
   1   0  -5    0.70    0.30
   1   0  -5   -0.20    0.30
   1   0  -4   -0.10    0.30
  -1   0   4   -0.10    0.30
  -1   0   4   -0.30    0.30
  -1   0   4   -0.30    0.40
   1   0  -4   -0.10    0.50
  -1   0   4    0.20    0.30
  -1   0   4    0.00    0.20
   1   0  -4   -0.30    0.20
   1   0  -4   -0.10    0.20
   1   0  -4   -0.20    0.30
  -1   0   3   -0.20    0.30
   1   0  -3    0.90    0.30
   1   0  -3    0.00    0.20
   1   0  -3   -0.10    0.20
   1   0  -3    0.20    0.20
   1   0  -3   -0.10    0.10
  -1   0   3    0.50    0.20
  -1   0   3    0.00    0.20
  -1   0   3    0.30    0.20
  -1   0   3   -0.10    0.20
   1   0  -2   -0.50    0.20
   1   0  -2   -1.20    0.10
  -1   0   2   -0.90    0.10
  -1   0   2   -0.60    0.10
  -1   0   2   -1.10    0.10
  -1   0   2   -0.20    0.30
   1   0  -2   -1.10    0.10
   1   0  -2   -1.30    0.10
  -1   0   2   -1.30    0.10
   1   0  -2   -1.20    0.10
   1   0  -1   -0.40    0.10
   1   0  -1   -0.30    0.10
  -1   0   1   -0.30    0.10
  -1   0   1   -0.40    0.10
   1   0  -1   -0.40    0.10
  -1   0   1   -0.40    0.10
  -1   0   0    0.00    0.10
  -1   0   0    0.00    0.10
  -1   0   0    0.00    0.10
   1   0   0    0.00    0.10
   1   0   0    0.00    0.10
   1   0   0    0.00    0.10
   1   0   0    0.00    0.10
   1   0   0    0.00    0.10
  -1   0   0   -0.10    0.10
  -1   0   0    0.00    0.10
   1   0   1   -0.50    0.10
  -1   0  -1   -0.50    0.10
   1   0   1   -0.50    0.10
   1   0   1   -0.50    0.10
  -1   0  -1   -0.50    0.10
  -1   0  -1   -0.40    0.10
  -1   0  -1   -0.50    0.10
   1   0   1   -0.50    0.10
   1   0   1   -0.40    0.10
  -1   0  -1   -0.50    0.10
  -1   0  -2   -1.30    0.10
   1   0   2   -0.60    0.20
   1   0   2   -1.10    0.20
  -1   0  -2   -1.10    0.10
  -1   0  -2   -1.10    0.10
   1   0   2   -1.20    0.10
   1   0   2   -1.20    0.10
  -1   0  -2   -1.30    0.10
  -1   0  -2   -1.20    0.10
   1   0   2   -1.10    0.10
  -1   0  -3    0.00    0.30
   1   0   3    0.00    0.30
   1   0   3    0.40    0.20
   1   0   3    0.50    0.20
  -1   0  -3    0.20    0.20
  -1   0  -3    0.00    0.20
   1   0   3    0.40    0.20
  -1   0  -3    0.10    0.20
  -1   0  -3    0.00    0.20
   1   0   3    0.00    0.20
  -1   0  -4   -0.50    0.20
   1   0   4   -0.20    0.40
  -1   0  -4   -0.50    0.40
   1   0   4   -0.20    0.30
  -1   0  -4    0.30    0.30
  -1   0  -4   -0.10    0.20
   1   0   4    0.00    0.30
   1   0   4   -0.20    0.20
   1   0   4    0.10    0.30
  -1   0  -4   -0.10    0.30
  -1   0  -5    0.60    0.30
   1   0   5    0.30    0.60
   1   0   5    0.10    0.30
  -1   0  -5    0.40    0.30
  -1   0  -5    0.70    0.40
   1   0   5    0.10    0.30
   1   0   5   -0.20    0.20
  -1   0  -5    0.10    0.50
   1   0   5    0.10    0.30
  -1   0  -5    0.90    0.30
  -1   0  -6   -0.80    0.30
   1   0   6   -0.40    0.40
  -1   0  -6    0.10    0.50
   1   0   6    0.20    0.40
   1   0   6   -0.20    0.40
  -1   0  -6   -0.50    0.30
   1   0   6   -0.70    0.70
  -1   0  -6   -0.10    0.80
  -1   0  -6   -0.30    0.40
   1   0   6   -0.70    0.30
  -1   0  -7   -1.30    0.30
   1   0   7   -1.00    0.40
   1   0   7   -0.50    0.40
  -1   0  -7   -0.60    0.80
   1   0   7   -0.20    0.50
  -1   0  -7   -0.60    0.40
   1   0   7   -0.50    0.40
  -1   0  -7   -0.60    0.50
   1   0   7   -0.90    0.70
  -1   0  -7   -0.50    0.40
   1   0   8    0.00    0.40
  -1   0  -8    1.10    0.50
  -1   0  -8    0.80    0.50
   1   0   8    0.60    0.50
  -1   0  -8    0.90    0.50
   1   0   8   -0.10    0.80
   1   0   8    0.10    0.40
  -1   0  -8    0.30    0.40
   1   0   8    0.70    0.50
  -1   0  -8    0.10    0.90
   1   0   9   -0.10    0.40
   1   0   9    0.70    0.50
  -1   0  -9    0.40    0.50
   1   0   9    1.30    0.60
  -1   0  -9    0.00    0.90
   1   0   9   -0.10    0.80
  -1   0  -9    0.20    0.50
  -1   0  -9   -0.10    0.40
  -1   0  -9   -0.30    0.50
   1   0   9    0.20    0.40
  -1   0 -10    0.90    0.50
   1   0  10    0.80    0.50
  -1   0 -10    0.00    0.50
  -1   0 -10    0.30    0.60
   1   0  10   -0.10    0.50
  -1   0 -10    0.40    0.60
   1   0  10    0.40    0.50
   1   0  10    0.60    0.50
  -1   0 -10    0.50    1.10
   1   0  11   -0.10    0.50
  -1   0 -11   -1.00    0.50
  -1   0 -11    0.10    0.50
  -1   0 -11   -0.20    0.50
  -1   0 -11   -0.50    1.00
   1   0  11   -0.30    0.40
   1   0  11    0.20    0.50
   1   0  11   -0.20    0.50
  -1   0 -11    0.60    0.70
   1   0  11    0.00    0.50
  -1   0 -11   -0.30    0.40
   1   0  12   -0.50    0.50
  -1   0 -12   -0.20    0.50
  -1   0 -12    1.20    1.30
  -1   0 -12    0.60    0.80
  -1   0 -12   -0.30    0.60
   1   0  12    0.40    0.50
  -1   0 -12   -0.10    0.60
   1   0  12    0.10    0.60
   1   0  12    0.50    0.60
  -1   0 -12    0.30    0.60
   1   0  12    0.80    0.60
   1   0  13   -0.50    0.60
   1   0  13    0.90    0.60
  -1   0 -13    0.60    0.70
   1   0  13   -0.10    0.50
  -1   0 -13    0.00    0.60
   1   0  13    0.70    0.60
  -1   0 -13    0.40    1.00
  -1   0 -13   -0.90    0.50
  -1   0 -13    0.00    0.60
  -1   0 -13    0.00    1.50
   1   0  13   -0.30    0.60
  -1   0 -14   -1.60    0.50
   1   0  14   -0.50    0.50
   1   0  14   -0.40    0.60
   1   0  14   -1.40    0.60
  -1   0 -14    0.90    0.90
   1   0  14   -0.40    0.60
   1   0  14   -0.90    0.70
  -1   0 -14   -0.30    0.60
  -1   0 -14    0.00    0.70
  -1   0 -14    0.20    0.70
  -1   0 -14    0.00    1.40
   1   0  15   -0.30    0.70
   1   0  15    0.40    0.70
  -1   0 -15    0.20    0.70
  -1   0 -15    0.10    1.00
   1   0  15    0.10    0.60
  -1   0 -15   -0.60    0.70
   1   0  15   -0.90    0.60
  -1   0 -15    0.30    1.50
  -1   0 -15   -0.90    0.70
   1   0  15    0.60    0.60
  -1   0 -15    0.20    0.70
  -1   0 -16    0.90    1.60
   1   0  16   -1.10    0.50
   1   0  16   -1.00    0.60
  -1   0 -16    0.10    0.90
  -1   0 -16    1.10    0.80
  -1   0 -16   -0.60    0.70
  -1   0 -16   -0.70    0.60
   1   0  16   -0.40    0.60
  -1   0 -16   -0.10    0.70
   1   0  16   -1.00    0.60
  -1   0 -16    0.60    0.80
   1   0  16    1.60    0.80
  -1   0 -17   -0.20    0.90
   1   0  17   -0.30    0.60
   1   0  17    0.10    0.80
   1   0  17    0.00    0.70
  -1   0 -17   -0.50    0.60
   1   0  17    0.00    0.80
  -1   0 -17   -1.00    0.70
  -1   0 -17   -0.10    1.40
  -1   0 -17   -0.70    0.80
   1   0  17    0.20    0.70
  -1   0 -17    0.30    0.80
  -1   0 -18    1.00    1.80
   1   0  18    0.10    0.80
  -1   0 -18    0.20    0.90
  -1   0 -18    1.00    1.20
  -1   0 -18   -0.60    0.80
   1   0  18   -0.20    0.80
   1   0  18    0.20    0.80
   1   0  18    0.00    0.80
  -1   0 -18   -0.90    0.80
   1   0  19   -1.40    0.70
   1   0  19    0.00    0.80
  -1   0 -19    2.20    1.40
  -1   0 -19   -0.50    0.90
  -1   0 -19   -0.20    1.70
   1   0  19    0.00    0.80
  -1   0 -19   -0.40    0.80
   1   0  19    0.20    0.70
   1   0  20   -0.50    0.80
  -1   0 -20    0.00    1.90
  -1   0 -20   -0.30    0.90
   1   0  20    1.20    0.90
  -1   0 -20   -0.20    1.00
   1   0  20   -0.30    0.80
   1   0  21    0.00    0.90
  -1   0 -21    0.60    1.10
   1   0  21    0.60    0.90
  -1   0 -21   -0.70    1.80
   1   0  21   -0.60    1.00
  -1   0 -21   -0.10    0.90
  -1   0 -22    1.20    2.40
   1   0  22   -1.40    0.80
  -1   0 -22   -0.30    1.20
   1   0  22    0.00    1.00
  -1   0 -22    2.80    1.20
   1   0  22    1.00    1.20
   1   0  23    0.10    1.20
   1   0  23    2.00    1.40
  -1   0 -23    2.40    2.80
  -1   0 -23   -1.00    1.40
   1   0  23   -1.30    1.00
  -1   0 -24    2.10    1.70
  -1   0 -24    4.00    3.10
   1   0  24    0.60    1.30
  -1   0 -25    2.90    1.90
  -1   0 -25    4.10    3.70
   1   0  25    1.70    1.30
   1   0  26   -0.70    1.30
  -1   0 -26    1.00    1.90
   1   0  27    0.10    1.20
   1   0  28    1.10    1.20
   1   0  29   -0.30    1.10
   1   0  30   -0.50    1.10
   1   0  31   -1.90    1.10
   1   0  32   -1.20    1.20
   1   0  33    0.00    1.30
   1   0  34   -1.20    1.30
   1   0  35   -0.60    1.30
   1   0  36    0.10    1.40
  -1   1  36    1.90    1.70
  -1  -1  36    1.50    1.50
  -1   1  35    0.60    1.50
  -1  -1  35    3.40    1.60
  -1   1  34   12.20    2.20
  -1  -1  34   12.30    2.10
  -1   1  33    1.90    1.40
  -1  -1  33    2.10    1.40
  -1   1  32   16.30    2.30
  -1  -1  32   13.80    2.10
  -1   1  31   11.20    2.00
   1   1 -31   11.60    2.80
  -1  -1  31   12.10    2.00
  -1   1  30    2.00    1.40
   1   1 -30    0.70    2.40
  -1  -1  30    5.10    1.50
   1   1 -29   -0.20    2.10
  -1   1  29    2.70    1.50
  -1  -1  29    1.00    1.40
   1   1 -28   17.40    2.70
  -1   1  28   16.90    2.20
  -1  -1  28   15.90    2.20
   1   1 -27    3.10    2.00
  -1   1  27    1.10    1.10
   1  -1 -27    3.30    1.70
  -1  -1  27    1.40    1.20
   1   1 -26    0.80    1.70
  -1   1  26    2.10    1.30
   1  -1 -26    2.00    1.60
   1  -1 -26    1.70    3.00
  -1  -1  26    2.80    1.30
  -1   1  25   10.60    1.70
   1   1 -25   11.10    2.30
   1   1 -25   16.90    5.20
   1  -1 -25   14.30    2.20
  -1  -1  25   13.30    1.80
   1  -1 -25   11.60    4.00
   1   1 -24   18.50    2.30
   1   1 -24   18.70    4.90
  -1   1  24   19.40    2.10
   1  -1 -24   18.20    4.40
  -1  -1  24   17.60    2.00
   1  -1 -24   17.20    2.30
   1   1 -23   20.60    5.10
  -1   1  23   19.10    2.50
  -1   1  23   19.00    2.30
   1   1 -23   13.90    2.20
  -1   1  23   16.10    1.90
   1  -1 -23   16.90    2.20
   1  -1 -23   18.80    4.40
  -1  -1  23   18.70    2.00
   1   1 -22   27.50    5.50
   1   1 -22   33.40    2.90
  -1   1  22   37.20    2.80
  -1   1  22   32.60    2.40
  -1   1  22   27.90    2.80
   1  -1 -22   33.50    5.00
   1  -1 -22   31.80    2.70
  -1  -1  22   31.10    2.40
  -1   1  21    9.20    1.50
   1   1 -21    9.40    1.80
   1   1 -21    9.90    3.70
  -1   1  21    9.30    1.70
  -1   1  21    9.50    1.70
  -1  -1  21    8.20    1.50
   1  -1 -21    7.90    1.70
   1  -1 -21    9.70    3.10
  -1   1  20    4.10    1.30
   1   1 -20    4.10    2.70
  -1   1  20    5.20    1.40
  -1   1  20    4.00    1.20
   1   1 -20    6.10    1.60
   1   1 -20    1.80    1.20
   1  -1 -20    3.10    1.20
  -1  -1  20    5.30    1.40
   1  -1 -20    4.60    2.40
  -1  -1  20    6.60    1.60
  -1  -1  20    5.70    1.20
  -1   1  19   61.99    3.00
   1   1 -19   59.89    3.50
  -1   1  19   56.19    3.30
   1   1 -19   69.59    3.90
  -1   1  19   65.39    3.60
   1   1 -19   43.90    6.10
   1   1 -19   61.69    3.60
  -1  -1  19   64.19    3.90
   1  -1 -19   62.29    6.00
  -1  -1  19   58.59    3.10
  -1  -1  19   60.99    3.60
  -1  -1  19   64.29    3.70
   1  -1 -19   57.29    3.30
   1   1 -18   20.40    4.30
   1   1 -18   19.90    2.20
  -1   1  18   21.80    1.90
   1   1 -18   21.80    2.20
  -1   1  18   23.10    1.80
   1   1 -18   18.70    2.10
   1   1 -18   21.90    2.20
  -1   1  18   23.60    2.10
   1  -1 -18   21.00    2.10
   1  -1 -18   21.10    3.70
  -1  -1  18   19.60    2.20
  -1  -1  18   22.40    2.10
  -1  -1  18   23.90    2.30
  -1  -1  18   19.20    1.80
  -1  -1  18   17.70    2.10
   1   1 -17   48.30    3.10
  -1   1  17   45.90    2.50
  -1   1  17   43.70    2.70
   1   1 -17   47.70    2.90
  -1   1  17   43.40    2.70
   1   1 -17   32.30    5.00
   1   1 -17   43.60    2.90
  -1   1  17   43.80    2.40
   1   1 -17   43.40    2.90
   1  -1 -17   43.60    4.60
  -1  -1  17   42.00    2.80
   1  -1 -17   41.90    2.60
  -1  -1  17   46.10    2.90
  -1  -1  17   50.39    3.00
  -1  -1  17   44.50    3.10
  -1  -1  17   45.00    2.40
   1  -1 -17   48.10    2.90
   1  -1 -17   40.20    2.60
  -1   1  16   53.49    3.00
  -1   1  16   58.19    2.90
   1   1 -16   45.40    5.70
   1   1 -16   61.49    3.30
   1   1 -16   58.89    3.40
  -1   1  16   56.49    2.70
  -1   1  16   54.39    3.00
  -1   1  16   58.99    3.10
   1   1 -16   52.39    3.10
   1   1 -16   61.39    3.40
   1  -1 -16   52.89    3.00
   1  -1 -16   51.19    3.00
  -1  -1  16   55.39    3.20
   1  -1 -16   57.89    3.10
  -1  -1  16   58.49    3.50
  -1  -1  16   57.49    3.30
  -1  -1  16   53.99    2.70
   1  -1 -16   55.19    2.90
   1  -1 -16   60.59    5.30
  -1  -1  16   57.29    3.20
   1   1 -15   64.29    3.50
   1   1 -15   54.29    6.10
   1   1 -15   68.89    3.50
  -1   1  15   68.39    3.30
  -1   1  15   68.99    3.30
   1   1 -15   68.69    3.70
   1   1 -15   61.29    3.30
  -1   1  15   60.69    3.20
  -1   1  15   62.59    2.90
  -1   1  15   66.49    3.10
  -1  -1  15   63.89    3.70
  -1  -1  15   62.49    2.90
   1  -1 -15   62.49    3.20
   1  -1 -15   64.19    3.30
   1  -1 -15   66.89    3.20
  -1  -1  15   64.39    3.40
   1  -1 -15   68.69    3.30
  -1  -1  15   63.59    3.50
   1  -1 -15   67.69    5.60
  -1  -1  15   64.59    3.50
  -1   1  14   55.39    2.90
   1   1 -14   52.89    3.10
   1   1 -14   61.29    3.20
  -1   1  14   54.89    2.50
  -1   1  14   55.19    2.90
   1   1 -14   56.69    3.20
   1   1 -14   51.59    3.00
   1   1 -14   44.30    5.20
  -1   1  14   50.69    2.80
  -1   1  14   54.99    2.70
   1   1 -14   53.09    3.10
   1  -1 -14   58.19    2.90
   1  -1 -14   46.90    2.80
   1  -1 -14   58.99    2.80
   1  -1 -14   53.89    2.80
  -1  -1  14   55.49    3.00
  -1  -1  14   52.39    2.90
  -1  -1  14   53.99    2.60
  -1  -1  14   53.19    3.10
  -1  -1  14   56.79    3.30
   1  -1 -14   55.29    4.90
   1   1 -13   60.39    6.10
   1   1 -13   69.69    3.50
   1   1 -13   64.09    3.20
   1   1 -13   64.29    3.50
  -1   1  13   67.39    3.20
   1   1 -13   70.49    3.40
  -1   1  13   67.79    3.00
  -1   1  13   59.79    3.00
   1   1 -13   64.89    3.40
  -1   1  13   63.79    3.20
   1  -1 -13   68.29    5.40
  -1  -1  13   61.89    2.80
   1  -1 -13   68.89    3.20
   1  -1 -13   64.09    3.00
   1  -1 -13   67.89    3.20
  -1  -1  13   64.29    3.40
   1  -1 -13   67.59    3.20
   1  -1 -13   61.49    3.10
  -1  -1  13   68.19    3.30
  -1  -1  13   67.19    3.70
  -1  -1  13   63.69    3.30
  -1   1  12   30.80    1.90
   1   1 -12   29.20    2.10
  -1   1  12   26.70    2.00
   1   1 -12   32.30    2.20
   1   1 -12   29.70    2.10
  -1   1  12   25.70    1.90
   1   1 -12   28.40    3.80
   1   1 -12   26.20    2.00
  -1   1  12   29.70    1.70
   1   1 -12   28.30    2.30
   1  -1 -12   27.10    1.90
  -1  -1  12   31.50    2.10
  -1  -1  12   27.80    1.80
   1  -1 -12   23.00    1.80
  -1  -1  12   27.60    2.20
   1  -1 -12   27.60    1.70
  -1  -1  12   29.80    2.20
  -1  -1  12   26.00    2.10
   1  -1 -12   32.60    2.00
   1  -1 -12   35.80    3.50
   1  -1 -12   27.70    2.00
  -1   1  11    7.50    1.10
   1   1 -11    7.20    1.20
   1   1 -11   10.10    2.50
   1   1 -11   10.20    1.40
  -1   1  11    9.20    0.90
   1   1 -11   10.90    1.40
  -1   1  11    7.10    1.10
   1   1 -11    8.20    1.20
  -1   1  11    8.80    1.10
   1   1 -11    9.30    1.30
  -1  -1  11    9.60    1.00
  -1  -1  11    9.60    1.30
   1  -1 -11    9.60    1.20
  -1  -1  11    9.10    1.40
  -1  -1  11    9.10    1.30
   1  -1 -11   11.40    2.10
  -1  -1  11    6.70    1.20
   1  -1 -11    8.80    1.10
   1  -1 -11    8.40    1.20
   1  -1 -11    8.50    0.90
   1   1 -10   11.60    1.30
  -1   1  10    9.90    2.10
  -1   1  10   12.30    1.30
  -1   1  10   12.60    1.10
   1   1 -10   12.30    1.30
  -1   1  10   13.90    1.00
   1   1 -10   14.90    2.60
   1   1 -10   13.30    1.40
   1   1 -10   11.90    1.30
   1   1 -10   14.10    1.50
  -1   1  10   12.50    1.20
   1  -1 -10   14.40    1.20
   1  -1 -10   14.30    1.00
  -1  -1  10   15.40    1.40
  -1  -1  10   10.80    1.10
  -1  -1  10   14.30    1.50
   1  -1 -10    7.60    1.00
   1  -1 -10   15.20    2.10
  -1  -1  10   12.00    1.40
  -1  -1  10   12.30    1.40
   1  -1 -10   10.90    1.20
  -1   1   9   57.99    2.50
  -1   1   9   58.99    2.70
   1   1  -9   60.69    2.70
   1   1  -9   61.09    2.90
  -1   1   9   57.19    2.60
   1   1  -9   61.89    2.70
   1   1  -9   57.59    4.80
  -1   1   9   56.29    4.40
   1   1  -9   55.79    3.00
  -1   1   9   56.99    2.50
   1  -1  -9   62.69    4.20
  -1  -1   9   59.19    2.70
  -1  -1   9   60.19    3.20
   1  -1  -9   61.89    2.60
   1  -1  -9   63.59    2.60
  -1  -1   9   58.19    2.80
  -1  -1   9   62.49    2.80
   1  -1  -9   65.29    2.70
   1   1  -8  186.18    6.30
  -1   1   8  187.08    6.10
  -1   1   8  164.88    7.10
  -1   1   8  189.78    6.10
   1   1  -8  185.78    6.30
   1   1  -8  185.58    7.60
  -1   1   8  185.48   10.60
   1   1  -8  198.38   11.00
  -1   1   8  189.58    6.40
   1   1  -8  196.88    6.80
  -1  -1   8  211.88   11.00
   1  -1  -8  193.48    6.50
  -1  -1   8  190.78    6.30
   1  -1  -8  198.98    7.00
  -1  -1   8  195.58    7.70
  -1  -1   8  179.68    6.30
   1  -1  -8  201.18   10.50
  -1  -1   8  188.48    6.80
   1  -1  -8  194.68    6.10
  -1   1   7   51.59    2.20
  -1   1   7   51.09    2.20
   1   1  -7   51.69    2.70
   1   1  -7   58.19    4.10
   1   1  -7   53.59    2.30
  -1   1   7   57.59    3.80
   1   1  -7   55.29    2.50
   1   1  -7   51.29    2.30
  -1   1   7   53.59    2.20
  -1   1   7   51.69    2.30
  -1  -1   7   52.39    2.80
   1  -1  -7   53.19    2.30
   1  -1  -7   56.79    3.70
  -1  -1   7   54.59    2.30
  -1  -1   7   58.19    2.40
  -1  -1   7   60.09    4.10
   1  -1  -7   55.29    2.20
   1   1  -6   95.99    3.70
   1   1  -6  102.59    6.00
  -1   1   6   94.59    3.30
  -1   1   6   92.29    3.30
   1   1  -6   97.19    3.50
   1   1  -6   89.39    3.40
   1   1  -6   90.29    4.20
  -1   1   6   98.39    3.70
  -1   1   6   95.49    3.50
  -1   1   6  106.19    5.70
  -1  -1   6   98.59    3.50
  -1  -1   6   98.79    4.30
   1  -1  -6  100.79    5.60
  -1  -1   6   97.19    3.80
  -1  -1   6  106.79    6.10
   1  -1  -6   96.89    3.50
   1  -1  -6   95.19    3.30
  -1  -1   6   94.39    3.40
   1   1  -5  153.68    5.00
   1   1  -5  157.88    8.60
  -1   1   5  156.78    4.80
   1   1  -5  156.78    5.40
  -1   1   5  154.28    5.70
  -1   1   5  156.68    4.80
   1   1  -5  152.58    6.20
   1   1  -5  154.68    5.00
  -1   1   5  163.08    8.30
  -1   1   5  156.58    5.20
  -1  -1   5  166.28    8.70
  -1  -1   5  150.58    5.40
   1  -1  -5  158.98    5.20
   1  -1  -5  157.28    8.30
  -1  -1   5  155.38    5.00
   1  -1  -5  154.58    4.90
   1  -1  -5  150.58    4.80
  -1  -1   5  154.78    6.30
   1  -1  -5  139.89    4.70
  -1  -1   5  153.68    5.00
   1   1  -4  221.28    7.30
   1   1  -4  214.88    6.70
  -1   1   4  223.28    6.50
  -1   1   4  227.78   11.40
  -1   1   4  223.88    6.50
  -1   1   4  226.28    7.10
   1   1  -4  226.08    6.70
   1   1  -4  225.38    8.50
   1   1  -4  228.48   11.80
  -1  -1   4  227.28    8.60
   1  -1  -4  229.38    7.10
  -1  -1   4  228.98   11.80
   1  -1  -4  224.08    6.50
   1  -1  -4  223.38    6.50
   1  -1  -4  224.68   11.40
  -1  -1   4  223.78    7.40
  -1  -1   4  217.48    6.70
   1  -1  -4  211.78    6.70
  -1   1   3  122.59    3.50
  -1   1   3  117.99    4.50
  -1   1   3  120.79    3.50
  -1   1   3  118.09    6.30
   1   1  -3  118.89    6.60
  -1   1   3  114.19    3.90
   1   1  -3  114.79    3.70
   1   1  -3  119.69    3.70
   1   1  -3  118.29    4.10
  -1  -1   3  120.69    4.10
  -1  -1   3  111.89    3.70
   1  -1  -3  119.19    3.50
  -1  -1   3  119.99    6.60
  -1  -1   3  118.79    4.80
   1  -1  -3  121.99    4.00
   1  -1  -3  115.69    3.50
   1   1  -2   25.20    1.10
   1   1  -2   24.80    1.10
   1   1  -2   23.40    1.00
   1   1  -2   23.70    2.00
  -1   1   2   25.00    0.90
  -1   1   2   25.40    0.90
  -1   1   2   24.30    1.20
   1   1  -2   23.70    1.50
  -1   1   2   24.30    1.30
   1   1  -2   24.70    1.20
  -1  -1   2   24.00    1.50
   1  -1  -2   26.40    1.30
  -1  -1   2   23.30    1.20
   1  -1  -2   24.40    0.90
  -1  -1   2   23.90    1.10
  -1  -1   2   26.10    1.10
   1  -1  -2   23.90    0.90
  -1  -1   2   25.30    2.10
   1   1  -1    4.90    0.40
   1   1  -1    5.10    0.50
   1   1  -1    4.80    0.40
   1   1  -1    4.90    0.90
   1   1  -1    4.90    0.40
   1   1  -1    4.60    0.70
  -1   1   1    4.50    0.50
  -1   1   1    5.20    0.60
  -1  -1   1    3.60    0.40
  -1  -1   1    3.40    0.30
  -1  -1   1    6.10    0.70
  -1  -1   1    5.70    1.00
   1  -1  -1    4.20    0.50
  -1  -1   1    4.50    0.40
  -1  -1   1    3.40    0.50
   1  -1  -1    5.20    0.60
  -1  -1   1    4.60    0.40
   1   1   0   34.70    1.10
  -1   1   0   34.50    1.40
   1   1   0   31.20    1.10
  -1   1   0   33.90    2.20
  -1   1   0   35.40    1.00
   1   1   0   34.90    1.40
  -1   1   0   34.40    1.00
   1   1   0   30.50    1.70
   1   1   0   34.60    1.10
  -1   1   0   32.30    1.60
   1  -1   0   35.60    2.30
  -1  -1   0   26.50    1.10
   1  -1   0   34.10    1.70
  -1   1  -1    5.00    0.40
  -1   1  -1    5.00    0.80
  -1   1  -1    4.80    0.60
   1   1   1    4.70    0.30
  -1   1  -1    5.20    0.70
  -1   1  -1    4.50    0.40
   1   1   1    5.00    0.30
   1   1   1    5.10    0.40
   1  -1   1    4.00    0.50
   1  -1   1    5.00    0.30
  -1  -1  -1    3.80    0.30
   1  -1   1    4.90    0.60
   1  -1   1    6.00    0.90
  -1  -1  -1    3.60    0.40
   1  -1   1    4.90    0.30
  -1  -1  -1    4.40    0.30
   1  -1   1    4.30    0.30
   1  -1   1    4.00    0.30
  -1   1  -2   24.10    1.50
  -1   1  -2   24.90    1.00
  -1   1  -2   25.60    1.30
  -1   1  -2   25.60    2.00
  -1   1  -2   25.00    1.00
   1   1   2   24.50    0.90
   1   1   2   24.90    0.90
   1   1   2   25.30    1.00
   1  -1   2   25.70    2.00
   1  -1   2   26.60    1.50
   1  -1   2   19.20    1.00
  -1  -1  -2   25.10    0.90
  -1  -1  -2   24.60    0.90
   1  -1   2   24.20    1.30
   1  -1   2   22.20    1.00
  -1   1  -3  120.39    3.70
   1   1   3  119.29    3.60
  -1   1  -3  114.39    3.70
   1   1   3  116.99    3.50
   1   1   3  120.39    6.50
  -1   1  -3  115.49    4.80
   1   1   3  117.79    3.80
  -1   1  -3  120.49    6.60
  -1   1  -3  118.59    4.10
   1  -1   3  116.89    3.70
   1  -1   3  125.29    6.60
   1  -1   3  116.79    4.10
  -1  -1  -3  114.49    3.50
   1  -1   3  116.89    4.80
  -1  -1  -3  117.69    3.50
  -1   1  -4  241.08   11.80
  -1   1  -4  214.38    6.70
  -1   1  -4  227.98    7.30
   1   1   4  223.58    6.90
   1   1   4  222.88    6.50
   1   1   4  230.88   11.60
   1   1   4  216.58    8.10
   1   1   4  223.58    6.50
  -1   1  -4  223.68    6.70
  -1   1  -4  222.58    8.50
   1  -1   4  229.78    8.50
  -1  -1  -4  195.28    6.50
   1  -1   4  217.78    6.60
   1  -1   4  219.38    7.30
  -1  -1  -4  216.28    6.50
  -1  -1  -4  220.48   11.50
  -1  -1  -4  225.18    6.90
   1  -1   4  241.58   11.90
  -1   1  -5  149.88    6.20
  -1   1  -5  148.99    5.00
  -1   1  -5  156.68    5.40
   1   1   5  157.68    4.80
   1   1   5  160.28    8.50
  -1   1  -5  168.18    8.90
   1   1   5  160.68    6.00
   1   1   5  156.38    4.80
  -1   1  -5  158.98    5.00
   1   1   5  157.38    5.00
   1  -1   5  177.68    9.00
   1  -1   5  157.48    6.40
   1  -1   5  151.68    5.00
   1  -1   5  153.08    5.00
  -1  -1  -5  145.99    4.80
  -1  -1  -5  156.88    5.00
  -1  -1  -5  160.78    8.60
   1   1   6   93.69    3.30
  -1   1  -6   96.69    3.70
   1   1   6   93.29    3.30
  -1   1  -6   95.39    3.40
  -1   1  -6   92.49    3.40
  -1   1  -6   99.89    6.20
   1   1   6   94.29    3.30
  -1   1  -6   92.79    4.20
   1   1   6   97.99    3.90
  -1  -1  -6   96.79    5.70
   1  -1   6   94.89    3.40
  -1  -1  -6   92.19    3.20
  -1  -1  -6   97.19    3.90
   1  -1   6   98.09    4.30
  -1  -1  -6   98.59    3.30
   1  -1   6   93.49    3.70
   1  -1   6   93.09    3.40
   1  -1   6  110.69    6.30
   1   1   7   51.09    2.20
  -1   1  -7   54.39    2.80
  -1   1  -7   52.19    2.30
  -1   1  -7   58.19    2.50
   1   1   7   49.70    2.50
  -1   1  -7   50.69    2.30
   1   1   7   56.59    3.80
   1   1   7   51.09    2.10
  -1   1  -7   54.09    4.30
   1   1   7   52.29    2.20
  -1  -1  -7   56.19    2.50
   1  -1   7   51.79    2.30
  -1  -1  -7   54.89    2.10
   1  -1   7   51.99    2.30
  -1  -1  -7   57.49    3.80
   1  -1   7   55.39    2.90
   1  -1   7   55.69    2.50
  -1  -1  -7   53.59    2.20
   1  -1   7   63.89    4.40
   1   1   8  202.08   10.70
  -1   1  -8  184.48    6.20
  -1   1  -8  185.98    6.20
   1   1   8  184.28    6.00
   1   1   8  188.08    6.30
  -1   1  -8  196.88    6.70
   1   1   8  174.68    7.40
   1   1   8  184.58    6.10
  -1   1  -8  190.28    7.60
  -1   1  -8  188.58   11.30
  -1  -1  -8  189.18    6.10
  -1  -1  -8  193.88    6.30
  -1  -1  -8  205.08   10.60
   1  -1   8  199.08    7.80
   1  -1   8  191.78    6.20
  -1  -1  -8  196.68    7.30
   1  -1   8  177.58    6.20
   1  -1   8  188.48    6.70
  -1   1  -9   60.69    2.80
   1   1   9   57.49    2.50
   1   1   9   55.09    2.90
  -1   1  -9   59.19    3.10
  -1   1  -9   61.39    2.70
   1   1   9   58.79    2.50
  -1   1  -9   58.49    5.10
   1   1   9   62.29    4.50
   1   1   9   58.79    2.50
  -1   1  -9   58.69    2.70
  -1  -1  -9   61.79    2.50
  -1  -1  -9   60.89    4.40
   1  -1   9   60.79    2.80
  -1  -1  -9   61.09    2.80
   1  -1   9   58.89    2.70
   1  -1   9   59.99    3.20
   1  -1   9   57.79    2.60
  -1  -1  -9   61.09    2.50
   1   1  10   11.70    1.20
  -1   1 -10    9.80    2.40
  -1   1 -10   13.60    1.50
  -1   1 -10   15.10    1.50
   1   1  10   15.80    1.20
  -1   1 -10   14.10    1.30
  -1   1 -10   11.10    1.30
   1   1  10   12.20    1.20
   1   1  10   15.30    1.10
  -1   1 -10   13.60    1.30
  -1  -1 -10   12.60    1.20
   1  -1  10   12.80    1.40
   1  -1  10   13.00    1.00
  -1  -1 -10   13.00    1.20
   1  -1  10   13.20    1.40
  -1  -1 -10   15.00    2.00
  -1  -1 -10   12.90    1.20
  -1  -1 -10   15.90    1.20
   1  -1  10   14.20    1.50
   1  -1  10   15.50    1.60
   1   1  11    8.20    1.10
   1   1  11    9.90    1.20
  -1   1 -11    7.70    1.10
  -1   1 -11    7.40    2.30
  -1   1 -11    8.10    1.20
  -1   1 -11   11.50    1.50
   1   1  11    8.80    1.10
  -1   1 -11    7.40    1.20
   1   1  11    9.00    1.10
  -1   1 -11    9.70    1.30
  -1  -1 -11    7.70    1.00
   1  -1  11   10.60    1.30
   1  -1  11    6.90    0.90
   1  -1  11   10.20    1.50
   1  -1  11    9.60    1.30
  -1  -1 -11   10.40    1.10
  -1  -1 -11   11.30    2.10
   1  -1  11    9.40    1.30
  -1  -1 -11    8.90    1.10
  -1  -1 -11    8.20    1.10
   1   1  12   26.50    1.90
  -1   1 -12   30.20    2.30
  -1   1 -12   25.10    2.00
   1   1  12   29.30    2.00
   1   1  12   33.40    1.90
  -1   1 -12   26.50    2.10
  -1   1 -12   30.60    2.10
  -1   1 -12   29.90    2.30
   1   1  12   28.20    2.00
  -1   1 -12   22.40    3.70
  -1  -1 -12   26.40    1.80
   1  -1  12   27.40    2.10
  -1  -1 -12   27.20    1.90
  -1  -1 -12   28.50    2.00
   1  -1  12   26.20    1.60
  -1  -1 -12   26.10    1.80
  -1  -1 -12   37.30    3.60
   1  -1  12   33.00    2.40
   1  -1  12   26.20    2.00
   1  -1  12   28.50    2.10
  -1  -1 -12   31.20    1.90
  -1   1 -13   50.69    6.00
   1   1  13   59.49    3.10
   1   1  13   69.39    3.10
  -1   1 -13   62.79    3.20
   1   1  13   67.69    3.30
  -1   1 -13   71.99    3.40
  -1   1 -13   63.19    3.20
   1   1  13   61.79    3.00
  -1   1 -13   63.49    3.50
  -1   1 -13   69.69    3.70
  -1  -1 -13   63.99    3.10
   1  -1  13   63.79    2.80
  -1  -1 -13   63.99    3.10
  -1  -1 -13   71.69    3.20
   1  -1  13   68.89    3.70
  -1  -1 -13   68.99    5.50
   1  -1  13   64.89    3.30
   1  -1  13   66.19    3.40
  -1  -1 -13   61.19    2.90
  -1  -1 -13   62.19    3.30
   1  -1  13   66.19    3.30
   1   1  14   50.59    2.80
  -1   1 -14   55.39    3.00
   1   1  14   57.49    2.90
   1   1  14   53.29    2.80
  -1   1 -14   58.29    3.10
  -1   1 -14   58.29    3.40
   1   1  14   53.99    2.50
  -1   1 -14   51.09    2.90
  -1   1 -14   52.19    2.90
  -1   1 -14   43.10    5.30
   1   1  14   54.39    2.70
   1  -1  14   50.39    2.90
  -1  -1 -14   52.19    2.70
  -1  -1 -14   53.09    2.80
  -1  -1 -14   58.09    5.00
  -1  -1 -14   54.09    2.80
   1  -1  14   46.30    2.80
   1  -1  14   55.09    3.10
   1  -1  14   55.69    3.40
  -1  -1 -14   49.30    3.00
   1  -1  14   52.39    2.50
  -1   1 -15   70.19    3.40
   1   1  15   66.39    3.30
  -1   1 -15   64.29    3.40
   1   1  15   62.49    3.20
   1   1  15   63.19    2.90
   1   1  15   64.79    3.20
  -1   1 -15   48.70    6.00
  -1   1 -15   64.99    3.50
   1   1  15   70.09    3.20
  -1   1 -15   68.29    3.80
  -1  -1 -15   71.79    5.80
   1  -1  15   66.19    3.80
  -1  -1 -15   59.69    3.50
   1  -1  15   66.89    3.40
   1  -1  15   66.59    3.00
   1  -1  15   66.79    3.40
  -1  -1 -15   65.79    3.10
   1  -1  15   69.99    3.60
  -1  -1 -15   63.19    3.20
  -1  -1 -15   68.69    3.20
   1   1  16   57.19    3.00
  -1   1 -16   56.79    3.20
   1   1  16   55.89    2.70
   1   1  16   57.99    3.10
  -1   1 -16   54.49    3.20
  -1   1 -16   50.89    3.10
  -1   1 -16   48.80    5.80
   1   1  16   51.89    3.00
   1   1  16   57.49    2.90
  -1   1 -16   62.89    3.70
   1  -1  16   59.29    3.20
   1  -1  16   51.29    3.20
  -1  -1 -16   51.89    3.20
   1  -1  16   52.69    3.10
  -1  -1 -16   54.49    3.00
  -1  -1 -16   56.89    3.00
  -1  -1 -16   58.69    5.40
  -1  -1 -16   53.29    2.90
   1  -1  16   53.19    2.70
   1  -1  16   58.69    3.60
  -1   1 -17   48.90    3.20
   1   1  17   48.20    2.70
  -1   1 -17   52.69    3.00
  -1   1 -17   47.40    2.90
   1   1  17   48.70    2.70
  -1   1 -17   45.30    2.90
   1   1  17   42.60    2.80
  -1   1 -17   35.70    5.30
   1   1  17   45.70    2.50
   1  -1  17   45.20    2.90
   1  -1  17   46.10    3.00
  -1  -1 -17   42.80    2.60
   1  -1  17   47.60    3.20
   1  -1  17   44.10    2.90
  -1  -1 -17   38.90    2.90
  -1  -1 -17   46.50    2.80
  -1  -1 -17   44.90    4.80
   1  -1  17   44.40    2.50
   1   1  18   26.30    2.00
  -1   1 -18   26.90    2.50
  -1   1 -18   19.70    2.20
  -1   1 -18   20.50    2.10
  -1   1 -18   21.80    2.20
   1   1  18   19.60    2.10
   1   1  18   21.00    1.90
  -1   1 -18   18.60    4.20
   1   1  18   20.00    1.80
   1  -1  18   19.40    1.80
   1  -1  18   20.40    2.30
   1  -1  18   23.40    2.30
  -1  -1 -18   21.00    3.80
  -1  -1 -18   24.50    2.00
  -1  -1 -18   18.10    2.00
   1  -1  18   16.90    2.10
   1  -1  18   20.60    2.20
  -1  -1 -18   23.00    2.00
  -1   1 -19   61.19    3.60
   1   1  19   59.39    3.50
   1   1  19   58.79    3.10
  -1   1 -19   61.99    3.50
  -1   1 -19   73.89    4.30
   1   1  19   59.19    3.30
  -1   1 -19   44.40    6.20
   1  -1  19   57.89    3.00
   1  -1  19   60.89    3.60
   1  -1  19   56.39    3.60
   1  -1  19   66.69    4.00
  -1  -1 -19   62.39    6.10
  -1  -1 -19   58.39    3.30
   1   1  20    4.40    1.10
   1   1  20    7.80    1.60
  -1   1 -20    6.60    1.70
  -1   1 -20    5.50    1.40
   1   1  20    5.60    1.40
  -1   1 -20    7.00    3.00
   1  -1  20    6.60    1.50
   1  -1  20    5.00    1.50
   1  -1  20    6.10    1.20
  -1  -1 -20    6.00    2.50
  -1  -1 -20    6.50    1.50
   1   1  21   10.10    1.70
  -1   1 -21   10.00    1.80
  -1   1 -21    9.90    3.60
   1   1  21    8.90    1.80
   1   1  21    9.00    1.50
  -1  -1 -21   11.20    3.40
  -1  -1 -21    9.90    1.80
   1  -1  21    7.50    1.40
   1  -1  21    8.70    1.80
   1  -1  21   11.70    2.10
   1   1  22   28.80    2.90
  -1   1 -22   34.30    2.80
  -1   1 -22   28.10    5.60
   1   1  22   29.20    2.40
  -1  -1 -22   38.10    2.90
   1  -1  22   33.80    2.50
  -1  -1 -22   34.90    4.90
   1   1  23   17.00    1.90
   1   1  23   15.70    2.30
  -1   1 -23   17.00    2.30
  -1   1 -23   23.10    5.30
  -1  -1 -23   19.40    4.40
   1  -1  23   18.20    2.00
  -1  -1 -23   15.70    2.10
  -1   1 -24   17.20    4.70
  -1   1 -24   13.70    2.10
   1   1  24   17.40    2.00
  -1  -1 -24   15.20    2.30
   1  -1  24   16.90    2.00
  -1  -1 -24   19.90    4.60
   1   1  25    9.90    1.70
  -1   1 -25    9.00    2.20
   1  -1  25   11.40    1.70
  -1  -1 -25   14.70    2.20
  -1  -1 -25    6.10    3.50
  -1   1 -26   -0.40    1.80
   1   1  26    1.30    1.20
  -1  -1 -26    4.00    1.70
   1  -1  26    3.30    1.40
  -1  -1 -26   -0.50    2.70
  -1   1 -27   -1.20    1.90
   1   1  27    3.80    1.40
   1  -1  27    4.70    1.50
   1   1  28   15.90    2.20
  -1   1 -28   14.80    2.60
   1  -1  28   15.30    2.10
   1   1  29    1.40    1.40
  -1   1 -29   -0.80    2.20
   1  -1  29    2.40    1.40
   1   1  30    3.20    1.50
  -1   1 -30    2.30    2.40
   1  -1  30    4.90    1.50
  -1   1 -31   10.80    2.80
   1   1  31    9.30    1.90
   1  -1  31    9.90    1.90
   1   1  32   10.80    2.00
   1  -1  32   11.30    2.00
   1   1  33    1.00    1.40
   1  -1  33    1.60    1.40
   1   1  34   13.80    2.20
   1  -1  34    7.90    1.90
   1   1  35    2.20    1.60
   1  -1  35    1.60    1.50
   1   1  36    1.50    1.60
   1  -1  36    1.80    1.60
   1   2 -35    9.80    3.70
  -1   2  35    8.40    2.10
  -1   2  34    4.00    1.80
   1   2 -34    6.10    3.30
   1   2 -33    4.90    3.30
  -1   2  33    5.00    1.80
   1   2 -32    0.40    2.70
  -1   2  32    0.80    1.50
  -1  -2  32    3.50    1.50
   1   2 -31    5.80    2.70
  -1   2  31    4.20    1.60
  -1  -2  31    6.80    1.70
   1  -2 -31    7.90    2.20
  -1   2  30    9.20    1.90
   1   2 -30    9.40    2.70
  -1  -2  30   13.50    1.90
   1  -2 -30   12.00    2.40
  -1   2  29   30.60    2.70
   1   2 -29   25.70    3.30
  -1  -2  29   24.70    2.40
   1  -2 -29   29.10    3.20
   1   2 -28    6.30    2.20
  -1   2  28   10.30    1.80
   1  -2 -28   11.00    2.20
  -1  -2  28    6.90    1.60
   1   2 -27    0.80    1.70
  -1   2  27    1.90    1.30
   1  -2 -27    3.20    1.60
  -1  -2  27    2.10    1.30
  -1   2  26    7.80    1.80
   1   2 -26    7.00    2.10
  -1  -2  26   11.10    1.70
   1  -2 -26    9.30    2.00
   1  -2 -26    8.00    3.20
   1   2 -25   15.40    2.50
  -1   2  25   19.40    2.20
   1  -2 -25   17.40    4.10
  -1  -2  25   16.50    1.90
   1  -2 -25   21.40    2.60
   1   2 -24    2.60    1.80
  -1   2  24    1.10    1.20
  -1  -2  24    2.90    1.30
   1  -2 -24    4.50    2.40
   1  -2 -24    7.50    1.80
  -1   2  23   34.20    2.60
   1   2 -23   32.60    3.20
   1   2 -23   32.40    6.30
   1  -2 -23   34.20    4.60
   1  -2 -23   37.70    3.00
  -1  -2  23   35.60    2.50
   1   2 -22   76.69    4.40
  -1   2  22   65.19    3.50
   1   2 -22   52.39    7.40
   1  -2 -22   72.89    3.90
  -1  -2  22   67.39    3.30
   1  -2 -22   59.59    6.10
  -1   2  21   77.69    3.60
   1   2 -21   76.69    4.30
   1   2 -21   75.69    4.40
   1   2 -21   54.99    7.40
   1  -2 -21   65.79    6.40
  -1  -2  21   72.09    3.40
   1  -2 -21   81.69    4.00
  -1   2  20   80.99    4.10
   1   2 -20   73.59    4.30
  -1   2  20   78.79    4.10
  -1   2  20   77.19    3.60
   1   2 -20   77.09    4.30
   1   2 -20   58.09    7.30
  -1  -2  20   80.49    4.00
  -1  -2  20   77.49    3.50
   1  -2 -20   69.29    6.50
  -1  -2  20   79.69    5.00
   1  -2 -20   83.49    4.00
   1   2 -19   86.89    4.50
   1   2 -19   71.19    7.90
  -1   2  19   84.29    4.10
  -1   2  19   84.29    4.20
   1   2 -19   92.79    4.50
  -1   2  19   83.89    3.70
  -1  -2  19   88.99    4.20
   1  -2 -19   78.19    6.80
  -1  -2  19   90.79    5.30
  -1  -2  19   84.19    3.60
   1  -2 -19   84.09    4.00
  -1   2  18  191.68    7.30
   1   2 -18  206.08    8.00
   1   2 -18  207.38    8.90
  -1   2  18  203.48    7.60
  -1   2  18  197.08    6.90
   1   2 -18  192.88    7.70
   1   2 -18  166.18   13.50
   1  -2 -18  197.18   12.50
  -1  -2  18  203.68    9.30
   1  -2 -18  202.18    7.10
  -1  -2  18  204.18    8.30
  -1  -2  18  203.08    6.90
  -1  -2  18  203.98    7.20
   1   2 -17   44.90    5.80
   1   2 -17   56.19    3.40
   1   2 -17   62.99    3.60
   1   2 -17   59.79    3.80
  -1   2  17   54.59    3.10
  -1   2  17   57.89    3.10
  -1  -2  17   57.09    4.00
  -1  -2  17   56.29    2.70
   1  -2 -17   54.99    3.10
  -1  -2  17   58.19    3.10
   1  -2 -17   63.59    3.10
   1  -2 -17   62.39    5.30
  -1  -2  17   58.09    3.70
  -1   2  16  101.59    4.30
   1   2 -16   82.39    7.80
   1   2 -16   99.59    4.60
  -1   2  16   90.29    4.10
   1   2 -16   95.89    4.50
   1   2 -16   88.79    4.90
  -1  -2  16   98.29    4.20
   1  -2 -16   90.49    4.00
  -1  -2  16   98.49    3.70
   1  -2 -16   91.59    6.90
   1  -2 -16   94.09    4.20
  -1  -2  16   97.39    5.40
  -1  -2  16   90.19    4.70
  -1   2  15    3.00    0.90
   1   2 -15    4.00    2.00
  -1   2  15    4.20    0.90
   1   2 -15    2.50    1.10
  -1   2  15    1.50    0.80
   1   2 -15    3.50    1.10
   1   2 -15    3.90    1.10
   1   2 -15    3.50    1.20
   1  -2 -15    4.60    1.00
  -1  -2  15    3.00    1.10
   1  -2 -15    3.00    0.90
  -1  -2  15    2.80    0.70
  -1  -2  15    2.70    0.90
  -1  -2  15    4.90    1.20
  -1  -2  15    2.90    1.30
   1  -2 -15    3.40    1.40
  -1   2  14   60.59    3.00
  -1   2  14   61.39    3.00
   1   2 -14   59.89    3.20
   1   2 -14   69.29    3.50
  -1   2  14   62.79    3.10
   1   2 -14   64.49    3.80
   1   2 -14   62.59    6.00
  -1   2  14   64.39    3.30
   1   2 -14   72.09    3.50
   1  -2 -14   67.39    3.10
  -1  -2  14   64.69    2.60
   1  -2 -14   64.39    3.10
  -1  -2  14   66.69    4.10
  -1  -2  14   62.69    3.60
   1  -2 -14   64.59    5.10
  -1  -2  14   65.59    3.20
  -1  -2  14   60.19    3.30
   1  -2 -14   64.29    3.00
   1   2 -13   75.39    4.20
   1   2 -13   82.49    3.70
  -1   2  13   84.19    3.40
   1   2 -13   78.69    6.40
  -1   2  13   72.99    3.30
  -1   2  13   71.09    3.30
   1   2 -13   77.09    3.60
   1   2 -13   79.79    3.60
  -1   2  13   68.29    3.60
   1  -2 -13   79.09    3.40
  -1  -2  13   76.59    2.80
   1  -2 -13   70.79    3.20
   1  -2 -13   79.79    5.60
   1  -2 -13   79.29    3.40
  -1  -2  13   71.79    3.60
  -1  -2  13   76.19    4.40
  -1  -2  13   74.99    3.30
  -1  -2  13   71.09    3.80
  -1  -2  13   72.99    3.60
  -1   2  12    7.30    1.00
   1   2 -12    9.20    1.50
   1   2 -12    8.10    1.20
   1   2 -12    7.90    1.20
  -1   2  12    5.40    0.90
  -1   2  12    5.50    0.90
   1   2 -12    7.40    1.20
  -1   2  12    6.30    1.00
   1   2 -12    7.10    2.10
   1  -2 -12    7.20    1.70
  -1  -2  12    7.90    1.60
  -1  -2  12    5.70    1.10
  -1  -2  12    9.10    1.30
   1  -2 -12    8.00    1.10
   1  -2 -12    5.70    0.90
   1  -2 -12    7.80    1.10
  -1  -2  12    7.40    0.70
  -1  -2  12    9.60    1.40
  -1  -2  12    5.40    1.20
   1   2 -11    6.20    1.20
   1   2 -11    7.70    2.10
   1   2 -11    8.60    1.20
  -1   2  11    6.90    1.00
  -1   2  11    8.20    1.00
  -1   2  11    6.50    1.00
   1   2 -11    6.10    1.10
  -1   2  11    8.20    0.90
   1   2 -11    8.50    1.20
   1   2 -11    8.10    1.40
   1  -2 -11    9.40    1.10
  -1  -2  11    7.90    1.20
  -1  -2  11    7.60    1.10
   1  -2 -11    7.30    1.60
  -1  -2  11    8.90    1.60
  -1  -2  11    7.20    1.10
   1  -2 -11    8.30    1.10
  -1  -2  11    7.90    1.30
   1  -2 -11    9.30    1.00
  -1   2  10   34.70    1.90
   1   2 -10   36.40    2.20
  -1   2  10   37.20    1.90
  -1   2  10   37.90    1.90
   1   2 -10   36.20    3.70
   1   2 -10   34.30    2.50
   1   2 -10   35.70    2.10
  -1   2  10   36.20    1.90
   1   2 -10   40.20    2.40
   1  -2 -10   35.70    3.20
   1  -2 -10   41.30    2.10
  -1  -2  10   34.90    2.30
   1  -2 -10   35.70    1.80
  -1  -2  10   38.10    2.20
  -1  -2  10   34.20    2.10
   1  -2 -10   37.00    1.90
  -1  -2  10   36.80    2.70
   1  -2 -10   36.30    1.90
   1   2  -9   88.49    3.90
  -1   2   9   86.19    3.20
  -1   2   9   88.89    3.20
  -1   2   9   85.79    3.40
   1   2  -9   83.09    3.50
   1   2  -9   85.09    3.50
  -1   2   9   83.59    3.60
   1   2  -9   80.19    4.30
   1   2  -9   90.79    6.20
   1  -2  -9   86.59    3.20
   1  -2  -9   88.09    3.50
  -1  -2   9   81.69    3.90
   1  -2  -9   88.29    3.20
  -1  -2   9   85.99    3.60
  -1  -2   9   83.59    3.50
   1  -2  -9   88.99    3.10
   1  -2  -9   82.39    5.50
  -1  -2   9   86.29    4.50
   1   2  -8  177.88    6.00
   1   2  -8  167.58    7.40
   1   2  -8  169.18    5.90
   1   2  -8  176.98    6.50
  -1   2   8  179.88    9.80
  -1   2   8  174.28    5.50
  -1   2   8  171.98    6.00
  -1   2   8  168.88    6.60
   1   2  -8  180.48   10.30
  -1   2   8  167.88    5.50
   1  -2  -8  173.28    5.80
   1  -2  -8  176.28    6.00
   1  -2  -8  177.88    5.50
  -1  -2   8  177.28    5.90
  -1  -2   8  159.58    6.40
   1  -2  -8  176.98    5.50
  -1  -2   8  176.28    7.60
   1   2  -7  306.67   12.60
  -1   2   7  324.07    9.50
  -1   2   7  321.97   10.50
   1   2  -7  329.37   17.50
   1   2  -7  318.87    9.90
   1   2  -7  319.97   10.00
  -1   2   7  321.37    9.60
  -1   2   7  348.87   17.00
   1   2  -7  332.07   10.90
  -1  -2   7  329.87   12.80
   1  -2  -7  323.37    9.50
   1  -2  -7  327.87    9.50
   1  -2  -7  333.57   10.50
  -1  -2   7  328.47    9.90
  -1  -2   7  311.27   10.90
   1  -2  -7  319.87    9.90
   1   2  -6  394.06   11.80
  -1   2   6  386.16   14.50
   1   2  -6  373.06   15.00
  -1   2   6  384.66   12.50
   1   2  -6  397.66   20.80
  -1   2   6  395.56   11.40
   1   2  -6  406.76   13.00
   1   2  -6  393.56   11.80
  -1   2   6  418.06   20.40
  -1   2   6  399.26   11.40
   1  -2  -6  411.76   12.60
  -1  -2   6  395.06   11.80
   1  -2  -6  401.06   11.30
   1  -2  -6  400.06   11.40
   1  -2  -6  394.46   11.80
  -1  -2   6  400.36   13.00
  -1  -2   6  387.56   15.20
  -1   2   5  481.45   13.20
   1   2  -5  476.05   15.00
  -1   2   5  460.75   17.00
   1   2  -5  465.55   24.20
   1   2  -5  467.45   13.70
  -1   2   5  475.15   13.20
   1   2  -5  469.25   13.60
   1   2  -5  460.05   17.50
  -1   2   5  465.15   14.70
   1  -2  -5  456.25   13.70
  -1  -2   5  460.15   15.00
   1  -2  -5  473.75   13.20
  -1  -2   5  458.35   13.60
   1  -2  -5  467.05   13.20
  -1  -2   5  476.95   13.60
  -1  -2   5  467.55   17.60
  -1  -2   5  477.15   14.00
  -1   2   4  465.25   12.90
  -1   2   4  468.75   14.50
  -1   2   4  442.06   14.50
   1   2  -4  473.65   14.80
   1   2  -4  481.65   13.40
  -1   2   4  447.66   16.90
  -1   2   4  466.75   13.00
   1   2  -4  449.16   17.30
   1   2  -4  458.55   13.40
   1   2  -4  467.75   23.90
   1  -2  -4  463.85   13.50
   1  -2  -4  473.75   12.90
  -1  -2   4  465.85   17.40
  -1  -2   4  480.65   24.00
  -1  -2   4  445.36   14.80
  -1  -2   4  472.55   13.40
   1  -2  -4  463.45   12.90
  -1  -2   4  449.86   13.30
  -1  -2   4  466.75   13.70
   1   2  -3   23.50    1.50
   1   2  -3   22.20    1.20
   1   2  -3   23.10    1.80
  -1   2   3   23.20    0.80
  -1   2   3   22.70    0.80
  -1   2   3   24.10    1.40
  -1   2   3   21.30    1.60
   1   2  -3   22.60    1.20
   1   2  -3   21.70    2.40
  -1  -2   3   22.80    1.20
  -1  -2   3   21.60    2.50
  -1  -2   3   22.80    1.20
   1  -2  -3   22.60    1.30
  -1  -2   3   21.90    1.40
  -1  -2   3   21.10    1.80
  -1  -2   3   22.80    1.10
   1   2  -2   61.19    3.30
   1   2  -2   59.99    2.60
  -1   2   2   59.09    3.00
   1   2  -2   63.59    2.20
   1   2  -2   60.09    4.40
   1   2  -2   59.59    2.20
   1   2  -2   64.69    2.20
  -1   2   2   62.89    2.60
   1  -2  -2   65.09    3.10
  -1  -2   2   58.19    2.10
  -1  -2   2   63.29    4.50
  -1  -2   2   63.09    2.00
   1  -2  -2   60.79    2.50
  -1  -2   2   59.09    2.60
  -1  -2   2   58.59    3.20
  -1  -2   2   60.89    2.20
   1  -2  -2   62.09    2.40
  -1   2   1 1017.60   38.00
   1   2  -1 1087.29   53.09
   1   2  -1 1082.49   32.70
   1   2  -1 1090.09   29.70
   1   2  -1 1023.80   38.10
   1   2  -1 1084.89   30.80
  -1   2   1 1096.59   32.70
   1   2  -1 1105.79   29.60
   1  -2  -1 1067.49   32.70
  -1  -2   1 1049.20   32.70
  -1  -2   1 1102.89   38.20
  -1  -2   1 1080.59   29.60
   1  -2  -1 1103.09   38.10
  -1  -2   1 1027.70   29.60
   1  -2  -1 1072.89   30.20
   1   2   0  833.42   24.40
  -1   2   0  865.91   42.40
   1   2   0  812.32   30.50
  -1   2   0  849.22   23.40
  -1   2   0  870.71   26.20
   1   2   0  873.01   23.60
   1   2   0  868.61   23.60
  -1   2   0  813.82   30.50
   1   2   0  865.61   26.10
  -1   2   0  860.41   23.40
  -1  -2   0  831.02   23.50
   1  -2   0  850.51   26.20
   1  -2   0  849.41   30.50
  -1  -2   0  872.51   30.60
  -1  -2   0  860.51   23.50
  -1  -2   0  862.11   24.00
   1  -2   0  865.51   24.10
  -1  -2   0  841.52   26.10
  -1   2  -1 1098.49   29.60
  -1   2  -1 1010.10   38.10
  -1   2  -1 1101.69   32.90
   1   2   1 1071.39   29.60
  -1   2  -1 1091.59   52.99
  -1   2  -1 1093.29   30.70
   1   2   1 1035.40   38.10
  -1   2  -1 1082.99   29.60
   1   2   1 1096.39   32.60
   1   2   1 1081.19   29.60
  -1  -2  -1 1094.99   32.70
   1  -2   1 1083.69   29.60
   1  -2   1 1080.19   52.99
   1  -2   1 1045.40   29.60
  -1  -2  -1 1088.29   30.10
   1  -2   1 1074.19   38.20
  -1  -2  -1 1065.89   29.50
   1  -2   1 1078.39   32.80
  -1  -2  -1 1056.09   29.50
   1   2   2   60.09    2.50
   1   2   2   62.29    1.90
  -1   2  -2   60.59    4.30
  -1   2  -2   59.79    3.20
  -1   2  -2   59.29    2.10
   1   2   2   60.29    1.90
   1   2   2   59.69    3.10
  -1   2  -2   65.09    2.70
  -1   2  -2   61.89    2.10
  -1  -2  -2   61.59    1.90
   1  -2   2   59.99    4.30
   1  -2   2   63.09    2.10
  -1  -2  -2   59.99    2.40
   1  -2   2   60.79    3.30
  -1  -2  -2   61.39    1.90
   1  -2   2   57.39    2.10
  -1  -2  -2   61.89    2.30
   1  -2   2   60.79    2.70
  -1   2  -3   23.30    1.80
  -1   2  -3   22.60    1.10
   1   2   3   23.70    0.90
  -1   2  -3   23.90    1.20
   1   2   3   22.40    1.20
   1   2   3   23.30    0.90
   1   2   3   20.40    1.60
  -1   2  -3   20.30    2.40
  -1   2  -3   25.10    1.50
   1  -2   3   22.60    2.50
  -1  -2  -3   22.40    0.90
   1  -2   3   22.50    1.50
  -1  -2  -3   21.80    0.90
   1  -2   3   20.60    1.10
   1  -2   3   22.70    1.20
  -1  -2  -3   22.00    1.20
   1  -2   3   22.70    1.00
   1  -2   3   19.70    1.80
  -1   2  -4  448.76   13.30
   1   2   4  447.46   14.30
   1   2   4  457.45   14.30
  -1   2  -4  467.25   14.80
  -1   2  -4  461.65   23.80
   1   2   4  463.55   13.00
  -1   2  -4  464.05   13.30
   1   2   4  469.45   13.00
  -1   2  -4  446.66   17.20
   1  -2   4  484.95   23.90
  -1  -2  -4  475.35   13.00
   1  -2   4  463.15   13.30
   1  -2   4  471.65   13.30
   1  -2   4  450.95   14.80
   1  -2   4  469.25   17.40
  -1  -2  -4  465.25   13.40
  -1  -2  -4  455.55   13.00
   1   2   5  475.65   13.30
  -1   2  -5  482.55   15.10
   1   2   5  483.75   23.90
   1   2   5  467.05   14.50
  -1   2  -5  456.75   13.60
   1   2   5  466.15   13.30
  -1   2  -5  468.15   13.60
  -1   2  -5  443.66   17.50
  -1   2  -5  472.65   24.20
   1   2   5  458.05   14.50
   1  -2   5  457.55   15.10
   1  -2   5  465.95   13.60
   1  -2   5  484.35   13.70
  -1  -2  -5  479.05   13.30
  -1  -2  -5  463.35   13.20
   1  -2   5  476.15   17.70
  -1  -2  -5  466.95   13.60
   1   2   6  418.46   20.40
   1   2   6  388.46   11.30
  -1   2  -6  398.46   20.70
  -1   2  -6  387.16   11.70
  -1   2  -6  402.36   12.90
  -1   2  -6  367.36   14.90
   1   2   6  395.76   11.30
   1   2   6  389.36   12.30
  -1   2  -6  395.26   11.70
  -1  -2  -6  399.66   11.60
  -1  -2  -6  392.76   11.30
   1  -2   6  397.76   15.10
   1  -2   6  397.26   11.70
   1  -2   6  379.06   12.90
  -1  -2  -6  402.36   11.40
   1   2   7  313.97   11.90
   1   2   7  315.47   10.20
   1   2   7  327.37    9.50
  -1   2  -7  296.97   12.50
  -1   2  -7  324.97   10.90
  -1   2  -7  316.67    9.80
  -1   2  -7  324.97    9.90
  -1   2  -7  351.26   17.60
   1   2   7  321.27    9.50
   1  -2   7  325.77    9.80
  -1  -2  -7  324.67    9.50
  -1  -2  -7  334.67   10.30
   1  -2   7  313.77   10.90
   1  -2   7  335.67   12.80
  -1  -2  -7  320.97    9.50
  -1   2  -8  167.98    7.40
  -1   2  -8  185.78   10.40
   1   2   8  173.58    5.50
   1   2   8  173.88    5.50
  -1   2  -8  174.08    6.40
  -1   2  -8  167.58    5.80
  -1   2  -8  171.88    5.80
   1   2   8  172.48    6.80
   1   2   8  171.58    5.80
  -1  -2  -8  176.08    5.80
   1  -2   8  163.08    6.40
  -1  -2  -8  172.28    5.50
   1  -2   8  171.98    7.60
  -1  -2  -8  175.98    5.50
   1  -2   8  174.08    5.80
  -1   2  -9   88.19    3.90
   1   2   9   85.09    3.80
  -1   2  -9   81.99    3.50
  -1   2  -9   83.19    3.50
  -1   2  -9   95.59    6.40
  -1   2  -9   87.29    4.40
   1   2   9   77.19    3.20
   1   2   9   86.69    3.20
   1   2   9   86.89    3.20
   1  -2   9   86.69    3.50
  -1  -2  -9   84.09    3.10
  -1  -2  -9   83.19    3.20
  -1  -2  -9   84.79    5.70
   1  -2   9   87.39    4.60
  -1  -2  -9   82.99    3.20
   1  -2   9   83.69    3.50
   1  -2   9   77.89    3.80
  -1  -2  -9   88.89    3.30
   1   2  10   35.00    1.90
   1   2  10   36.40    2.10
   1   2  10   37.30    1.80
   1   2  10   33.90    1.90
  -1   2 -10   36.50    3.80
  -1   2 -10   34.00    2.10
  -1   2 -10   38.10    2.70
  -1   2 -10   36.50    2.30
  -1   2 -10   40.50    2.20
   1  -2  10   35.80    2.20
   1  -2  10   38.20    2.10
  -1  -2 -10   32.80    1.80
  -1  -2 -10   37.40    3.30
   1  -2  10   38.50    2.80
  -1  -2 -10   34.90    1.90
  -1  -2 -10   39.00    2.00
   1  -2  10   35.20    2.30
  -1  -2 -10   40.30    1.90
   1   2  11    9.00    1.20
  -1   2 -11    6.00    1.00
  -1   2 -11    8.20    1.20
   1   2  11    7.10    0.90
  -1   2 -11    7.60    2.30
  -1   2 -11    9.40    1.50
  -1   2 -11    7.30    1.20
   1   2  11    8.10    1.00
  -1   2 -11    7.60    1.30
   1   2  11    7.30    1.00
   1  -2  11    9.30    1.20
   1  -2  11    8.10    1.30
  -1  -2 -11    7.10    1.70
  -1  -2 -11    7.50    1.00
  -1  -2 -11    8.00    0.90
   1  -2  11    6.50    1.10
  -1  -2 -11    7.40    1.00
   1  -2  11    7.90    1.50
   1  -2  11    4.50    1.00
  -1   2 -12    8.10    1.40
  -1   2 -12    7.60    2.20
   1   2  12    7.10    1.00
  -1   2 -12    6.90    1.20
   1   2  12    7.10    0.90
  -1   2 -12    6.40    1.20
   1   2  12    7.80    1.20
   1   2  12    6.90    1.00
  -1   2 -12    6.70    1.10
  -1  -2 -12    8.60    1.00
   1  -2  12    7.30    1.10
  -1  -2 -12    7.60    1.00
   1  -2  12    6.50    1.20
  -1  -2 -12    6.60    1.00
   1  -2  12    6.70    1.20
   1  -2  12    9.00    1.60
  -1  -2 -12    5.70    1.60
   1  -2  12    5.90    1.10
   1   2  13   69.69    3.80
  -1   2 -13   74.39    3.60
  -1   2 -13   76.49    6.60
  -1   2 -13   71.69    3.50
  -1   2 -13   79.79    4.30
   1   2  13   71.89    3.20
  -1   2 -13   73.89    3.60
   1   2  13   72.49    3.30
   1   2  13   74.79    3.30
  -1  -2 -13   71.19    3.30
   1  -2  13   81.19    4.50
  -1  -2 -13   76.29    3.20
  -1  -2 -13   77.29    3.20
  -1  -2 -13   80.49    5.80
   1  -2  13   76.19    3.30
   1  -2  13   73.49    2.80
   1  -2  13   78.99    3.70
   1  -2  13   75.39    3.90
   1  -2  13   75.69    2.70
  -1   2 -14   65.29    3.30
  -1   2 -14   60.19    3.70
   1   2  14   56.89    3.40
  -1   2 -14   55.09    5.90
   1   2  14   64.79    3.10
  -1   2 -14   67.89    3.40
   1   2  14   60.89    3.00
  -1   2 -14   66.99    3.40
   1   2  14   67.49    3.00
   1  -2  14   62.69    2.50
   1  -2  14   62.99    3.10
  -1  -2 -14   68.29    5.30
   1  -2  14   71.19    3.50
  -1  -2 -14   71.49    3.00
   1  -2  14   63.59    2.50
   1  -2  14   68.09    3.60
  -1  -2 -14   49.20    2.80
  -1  -2 -14   62.49    2.90
   1  -2  14   68.69    4.10
   1   2  15    2.60    0.90
   1   2  15    2.60    0.90
  -1   2 -15    3.80    1.10
   1   2  15    2.20    0.80
  -1   2 -15    1.90    1.00
  -1   2 -15    1.70    1.80
  -1   2 -15    1.50    0.90
  -1  -2 -15    4.10    0.90
  -1  -2 -15    2.00    0.80
   1  -2  15    3.10    1.00
   1  -2  15    3.20    1.10
   1  -2  15    2.90    0.70
   1  -2  15    1.80    1.10
   1  -2  15    4.90    1.40
  -1  -2 -15    3.50    1.40
   1   2  16  103.19    4.20
  -1   2 -16   95.79    5.20
  -1   2 -16   73.59    7.70
   1   2  16   94.99    4.60
   1   2  16   88.49    4.10
  -1   2 -16   90.49    4.40
  -1   2 -16   98.59    4.60
   1  -2  16   93.09    3.60
   1  -2  16  103.29    5.50
  -1  -2 -16   98.39    4.10
  -1  -2 -16   89.09    6.90
   1  -2  16   99.59    4.90
  -1  -2 -16   95.29    4.10
   1  -2  16   92.89    4.10
   1   2  17   65.99    3.20
  -1   2 -17   49.30    6.10
  -1   2 -17   62.49    3.60
  -1   2 -17   58.39    3.40
   1   2  17   56.29    2.80
   1   2  17   59.19    3.20
  -1   2 -17   63.29    4.00
   1  -2  17   60.39    4.10
  -1  -2 -17   54.99    5.30
  -1  -2 -17   62.89    3.20
   1  -2  17   58.89    3.60
   1  -2  17   58.29    2.70
   1  -2  17   63.09    3.30
  -1  -2 -17   60.99    3.10
   1   2  18  203.08    7.10
   1   2  18  199.18    7.50
  -1   2 -18  204.68    7.80
  -1   2 -18  209.88    8.10
   1   2  18  203.18    7.60
  -1  -2 -18  199.48   12.90
   1  -2  18  202.58    7.00
   1  -2  18  202.68    7.30
  -1  -2 -18  203.58    7.20
   1  -2  18  203.58    8.40
   1  -2  18  223.88    9.70
   1   2  19   84.79    4.20
   1   2  19   81.29    3.70
  -1   2 -19   87.79    4.50
  -1   2 -19   86.89    4.50
  -1  -2 -19   81.49    7.00
   1  -2  19   95.49    5.40
   1  -2  19   88.49    4.10
   1  -2  19   81.19    3.60
  -1  -2 -19   88.49    4.10
   1   2  20   80.19    4.10
  -1   2 -20   74.89    4.30
  -1   2 -20   72.99    4.20
   1   2  20   78.89    3.60
  -1   2 -20   61.69    7.60
  -1  -2 -20   78.69    3.90
  -1  -2 -20   75.09    6.70
   1  -2  20   77.99    3.90
   1  -2  20   74.59    3.40
  -1   2 -21   87.29    4.50
  -1   2 -21   54.09    7.40
   1   2  21   78.09    3.60
  -1   2 -21   76.29    4.30
  -1  -2 -21   63.19    6.50
  -1  -2 -21   78.39    4.00
   1  -2  21   77.79    3.50
   1   2  22   69.89    3.50
  -1   2 -22   49.30    7.10
  -1   2 -22   74.79    4.30
  -1  -2 -22   65.79    6.50
   1  -2  22   61.89    3.20
  -1  -2 -22   66.99    3.80
  -1   2 -23   34.90    3.10
   1   2  23   32.10    2.70
  -1   2 -23   24.80    5.60
   1  -2  23   38.70    2.50
  -1  -2 -23   39.70    3.00
  -1  -2 -23   36.40    4.80
  -1   2 -24    5.30    1.90
   1   2  24    3.20    1.40
  -1  -2 -24    3.80    1.60
   1  -2  24    2.50    1.20
  -1  -2 -24    1.40    2.20
   1   2  25   21.20    2.20
  -1   2 -25   18.00    2.60
  -1  -2 -25   17.10    4.10
   1  -2  25   15.40    1.90
  -1  -2 -25   19.10    2.50
   1   2  26   11.60    1.90
  -1   2 -26    9.30    2.20
  -1  -2 -26    9.90    2.10
   1  -2  26    9.10    1.70
   1   2  27    2.40    1.40
  -1   2 -27    0.40    1.80
   1  -2  27    2.40    1.30
  -1  -2 -27    1.70    1.50
   1   2  28    7.90    1.70
  -1   2 -28    7.30    2.20
  -1  -2 -28    7.90    2.00
   1  -2  28    9.10    1.60
   1   2  29   31.00    2.70
  -1   2 -29   23.30    3.20
   1  -2  29   30.00    2.50
  -1  -2 -29   34.30    3.40
  -1   2 -30    7.50    2.60
   1   2  30   11.40    2.00
   1  -2  30   10.80    1.90
  -1  -2 -30   13.20    2.40
  -1   2 -31    5.80    2.70
   1   2  31    5.90    1.80
   1  -2  31    7.30    1.70
  -1  -2 -31    7.40    2.20
  -1   2 -32   -0.40    2.70
   1   2  32    2.70    1.60
  -1   2 -33    5.80    3.30
   1   2  33    7.20    1.90
  -1   2 -34    6.40    3.40
   1   2  34    4.50    1.80
  -1   2 -35    9.00    3.60
   1   2  35    9.20    2.20
   1   3 -34   33.80    4.50
  -1   3  34   42.50    3.50
   1  -3 -34   44.30    4.40
   1   3 -33   12.90    3.40
  -1   3  33   13.10    2.30
   1  -3 -33   15.10    2.80
   1   3 -32   46.50    4.70
   1  -3 -32   50.89    4.20
   1   3 -31   27.10    3.80
   1  -3 -31   34.10    3.60
   1   3 -30   27.70    3.60
   1  -3 -30   32.00    3.40
   1   3 -29    7.90    2.40
   1  -3 -29   12.20    2.30
   1   3 -28   43.30    4.00
   1  -3 -28   47.60    3.70
   1   3 -27   26.60    3.20
   1  -3 -27   34.20    3.30
   1   3 -26   10.00    2.30
   1  -3 -26   11.60    2.10
   1   3 -25   19.70    2.80
   1  -3 -25   26.00    2.80
   1   3 -24   17.30    2.60
   1  -3 -24   17.40    2.30
   1   3 -23   47.40    3.80
   1  -3 -23   47.10    3.30
   1  -3 -23   44.60    5.40
   1   3 -22   29.60    3.20
   1  -3 -22   34.00    4.40
  -1  -3  22   39.40    3.20
   1  -3 -22   34.10    2.80
   1   3 -21    8.70    2.00
   1   3 -21    6.90    3.30
   1   3 -21    5.90    1.80
   1  -3 -21   13.00    3.10
  -1  -3  21    6.90    1.70
   1  -3 -21    8.30    1.70
   1   3 -20    9.40    2.00
   1   3 -20    8.00    1.80
   1   3 -20    8.20    3.20
   1  -3 -20    7.90    1.60
   1  -3 -20   10.10    2.70
  -1  -3  20   12.20    2.00
   1   3 -19  126.59   11.10
   1   3 -19  141.29    6.30
   1   3 -19  141.49    6.30
  -1  -3  19  149.69    6.00
   1  -3 -19  146.69    5.70
   1  -3 -19  140.29    9.90
   1   3 -18   81.09    4.40
   1   3 -18   75.49    4.30
   1   3 -18   78.99    7.70
  -1  -3  18   81.49    4.00
   1  -3 -18   80.99    3.90
   1  -3 -18   76.29    6.50
  -1   3  17   29.90    2.20
   1   3 -17   26.30    2.50
   1   3 -17   27.70    2.70
   1   3 -17   24.60    4.50
   1  -3 -17   26.90    3.60
   1  -3 -17   29.70    2.30
  -1  -3  17   30.60    2.40
   1   3 -16  307.57   19.40
   1   3 -16  325.67   11.00
  -1   3  16  325.27   11.00
  -1   3  16  309.07   10.40
   1   3 -16  308.27   11.20
   1  -3 -16  344.37   11.20
  -1  -3  16  321.67   10.40
   1  -3 -16  316.37   10.10
  -1   3  15  145.29    5.60
  -1   3  15  156.38    5.90
   1   3 -15  145.39   10.80
   1   3 -15  144.39    6.10
   1   3 -15  150.98    6.10
   1  -3 -15  151.58    5.50
  -1  -3  15  149.69    5.80
   1  -3 -15  166.58    6.10
  -1  -3  15  148.79    6.80
   1   3 -14  166.38    6.60
  -1   3  14  176.78    6.20
  -1   3  14  171.38    6.50
   1   3 -14  177.68    6.60
   1   3 -14  178.88   11.80
  -1  -3  14  169.98    8.60
  -1  -3  14  174.38    7.50
   1  -3 -14  185.78    6.70
   1  -3 -14  171.58    6.00
  -1  -3  14  172.38    6.30
  -1   3  13   51.19    2.70
   1   3 -13   52.69    5.20
   1   3 -13   48.30    2.60
  -1   3  13   52.99    2.80
  -1   3  13   55.09    2.60
   1   3 -13   46.20    2.90
  -1   3  13   47.80    2.50
  -1  -3  13   50.99    3.40
   1  -3 -13   59.29    2.90
  -1  -3  13   53.09    2.80
  -1  -3  13   56.29    4.00
   1  -3 -13   49.90    2.50
   1   3 -12  257.07    8.60
   1   3 -12  249.28    8.80
  -1   3  12  252.47    8.30
   1   3 -12  267.07   15.50
  -1   3  12  269.37   10.00
  -1   3  12  256.87   10.30
  -1   3  12  265.77    8.30
  -1   3  12  253.57    8.90
   1   3 -12  244.88   11.00
   1  -3 -12  270.47    8.30
  -1  -3  12  267.37    8.40
   1  -3 -12  261.67    8.00
  -1  -3  12  260.77   11.50
   1  -3 -12  266.37    9.10
  -1  -3  12  247.48    9.80
   1   3 -11    1.50    1.40
  -1   3  11    1.50    0.80
  -1   3  11    3.00    0.70
   1   3 -11    0.80    0.80
   1   3 -11    2.60    1.00
  -1   3  11    2.90    0.70
  -1   3  11    2.10    0.70
   1   3 -11    2.80    1.30
  -1   3  11    2.20    0.80
  -1  -3  11    3.90    1.20
   1  -3 -11    2.40    0.80
   1  -3 -11    2.30    0.70
  -1  -3  11    3.20    1.30
   1  -3 -11    2.20    0.70
  -1  -3  11    0.00    0.40
  -1  -3  11    2.00    0.80
  -1   3  10  249.28    7.60
   1   3 -10  242.68    8.10
  -1   3  10  238.98    8.30
  -1   3  10  238.58    7.60
  -1   3  10  245.38    9.70
   1   3 -10  238.38   10.40
   1   3 -10  234.68    8.10
   1   3 -10  237.98   14.30
   1  -3 -10  241.98    7.50
   1  -3 -10  246.28    8.10
   1  -3 -10  240.98    7.30
  -1  -3  10  244.48    7.70
  -1  -3  10  235.08    9.10
  -1  -3  10  250.37   10.70
  -1   3   9  158.88    6.60
   1   3  -9  158.48    5.60
   1   3  -9  148.79    9.80
  -1   3   9  153.38    5.60
  -1   3   9  162.68    5.00
  -1   3   9  152.48    5.00
   1   3  -9  141.19    7.10
   1   3  -9  154.38    5.50
  -1  -3   9  155.38    5.20
   1  -3  -9  154.28    5.00
   1  -3  -9  151.58    5.50
   1  -3  -9  151.88    4.80
  -1  -3   9  157.88    5.50
  -1  -3   9  152.48    7.40
  -1  -3   9  144.59    6.20
  -1  -3   9  153.58    5.60
  -1   3   8  428.96   12.60
   1   3  -8  447.96   13.20
  -1   3   8  435.76   14.00
   1   3  -8  443.06   13.20
  -1   3   8  439.76   12.50
  -1   3   8  433.76   16.30
   1   3  -8  422.06   17.00
   1   3  -8  414.06   23.30
  -1  -3   8  444.06   13.30
  -1  -3   8  442.06   17.30
   1  -3  -8  425.96   13.10
  -1  -3   8  433.36   12.60
  -1  -3   8  435.06   13.20
   1  -3  -8  428.16   12.10
  -1  -3   8  412.66   14.60
   1  -3  -8  450.35   12.50
  -1   3   7  319.87    9.20
   1   3  -7  299.67   17.50
   1   3  -7  319.77   11.00
  -1   3   7  311.67   10.50
   1   3  -7  328.97    9.90
   1   3  -7  315.57   12.90
   1   3  -7  312.87    9.80
  -1   3   7  316.17   12.30
  -1   3   7  311.27   10.40
  -1   3   7  318.27    9.20
  -1  -3   7  325.67    9.90
  -1  -3   7  308.57    9.30
   1  -3  -7  328.17    9.20
   1  -3  -7  322.07    8.90
  -1  -3   7  303.77   11.00
  -1  -3   7  316.37   13.00
   1  -3  -7  314.37    9.90
  -1  -3   7  315.57    9.80
   1   3  -6  194.98    6.30
  -1   3   6  195.08    8.00
   1   3  -6  192.18    7.20
  -1   3   6  189.88    5.60
  -1   3   6  194.98    5.70
   1   3  -6  198.28    6.30
   1   3  -6  179.28   11.40
  -1   3   6  195.18    6.80
  -1   3   6  181.48    6.70
   1   3  -6  184.08    8.40
   1  -3  -6  191.08    5.50
  -1  -3   6  187.88    5.90
  -1  -3   6  188.28    7.20
   1  -3  -6  202.18    5.60
   1  -3  -6  194.88    6.40
  -1  -3   6  195.38    6.30
   1  -3  -6  188.48    5.50
  -1  -3   6  197.68    8.70
  -1  -3   6  189.88    6.20
   1   3  -5  424.06   12.90
  -1   3   5  428.76   16.50
   1   3  -5  438.56   14.50
   1   3  -5  449.76   13.00
   1   3  -5  412.26   16.90
  -1   3   5  441.86   12.30
  -1   3   5  444.16   14.20
  -1   3   5  437.36   12.30
   1   3  -5  427.36   23.40
  -1   3   5  452.75   14.20
  -1  -3   5  452.35   17.20
  -1  -3   5  421.86   14.50
   1  -3  -5  440.66   13.20
  -1  -3   5  440.66   12.90
  -1  -3   5  460.05   13.00
  -1  -3   5  448.56   13.00
  -1  -3   5  440.06   12.40
   1   3  -4  169.68    5.50
   1   3  -4  167.68    7.70
  -1   3   4  172.58    7.40
  -1   3   4  177.18    6.20
   1   3  -4  171.98   10.50
   1   3  -4  177.98    5.60
   1   3  -4  166.68    6.40
  -1  -3   4  168.58    7.70
  -1  -3   4  168.28    5.50
   1  -3  -4  176.38    5.80
  -1  -3   4  175.98    5.50
  -1  -3   4  173.08    5.20
  -1  -3   4  171.88    5.30
  -1  -3   4  164.18    6.40
   1   3  -3   24.50    2.90
   1   3  -3   23.80    1.30
  -1   3   3   23.50    1.60
  -1   3   3   20.90    1.90
   1   3  -3   22.80    1.20
   1   3  -3   21.40    2.10
   1   3  -3   26.40    1.70
   1   3  -3   23.00    1.20
  -1  -3   3   23.10    1.20
  -1  -3   3   22.80    2.20
  -1  -3   3   21.60    1.70
  -1  -3   3   23.10    1.30
   1  -3  -3   19.50    1.40
  -1  -3   3   22.00    1.20
   1   3  -2   75.79    4.20
   1   3  -2   74.99    3.40
   1   3  -2   76.79    2.70
   1   3  -2   79.19    2.70
  -1   3   2   75.59    4.00
   1   3  -2   75.09    2.60
  -1   3   2   78.49    3.30
   1   3  -2   78.89    5.80
  -1  -3   2   71.99    2.60
  -1  -3   2   75.39    2.60
   1  -3  -2   74.09    3.30
  -1  -3   2   75.19    4.20
   1  -3  -2   75.29    3.00
  -1  -3   2   74.19    3.40
   1  -3  -2   77.49    4.00
  -1   3   1    8.30    1.10
  -1   3   1    5.80    1.60
  -1   3   1    6.00    1.20
   1   3  -1    5.00    0.50
   1   3  -1    7.40    1.40
   1   3  -1    7.30    0.60
   1   3  -1    8.40    1.10
   1   3  -1    5.70    1.60
   1   3  -1    6.20    0.60
   1  -3  -1    6.50    1.00
   1  -3  -1    6.30    0.90
  -1  -3   1    5.90    0.60
  -1  -3   1    5.80    0.60
   1  -3  -1    5.90    1.20
  -1  -3   1    4.90    0.90
  -1  -3   1    7.20    1.40
   1   3   0   15.60    0.80
  -1   3   0   13.80    0.60
  -1   3   0   14.20    0.70
   1   3   0   13.80    0.70
   1   3   0   15.20    1.70
   1   3   0   13.50    1.30
   1   3   0   12.50    2.30
   1   3   0   13.20    0.70
  -1   3   0   13.40    2.10
  -1   3   0   14.60    1.40
  -1   3   0   13.70    1.60
  -1  -3   0   12.20    1.10
   1  -3   0   13.20    1.20
   1  -3   0   14.90    1.70
  -1  -3   0   16.40    1.70
  -1  -3   0   13.60    0.70
   1  -3   0   15.40    1.30
  -1  -3   0   14.00    1.30
  -1  -3   0   14.10    0.70
  -1   3  -1    5.40    1.00
   1   3   1    7.00    0.50
   1   3   1    7.70    1.00
  -1   3  -1    5.60    1.20
  -1   3  -1    5.90    0.50
  -1   3  -1    6.10    1.60
  -1   3  -1    5.70    0.50
  -1   3  -1    6.30    0.50
   1   3   1    7.60    1.40
   1   3   1    7.10    0.50
   1  -3   1    6.50    0.50
  -1  -3  -1    5.90    0.80
   1  -3   1    6.40    0.50
   1  -3   1    5.90    0.50
   1  -3   1    7.00    1.30
  -1  -3  -1    6.60    0.40
   1  -3   1    5.60    1.00
  -1  -3  -1    4.90    0.90
  -1  -3  -1    7.10    0.50
   1   3   2   77.89    2.40
  -1   3  -2   83.69    3.50
   1   3   2   75.49    2.30
  -1   3  -2   76.99    2.60
   1   3   2   75.19    3.20
   1   3   2   71.49    4.00
  -1   3  -2   72.89    4.10
  -1   3  -2   76.69    2.60
  -1   3  -2   77.59    5.60
   1  -3   2   71.89    2.50
  -1  -3  -2   73.59    3.20
   1  -3   2   74.99    2.50
   1  -3   2   75.49    3.50
  -1  -3  -2   77.59    2.90
   1  -3   2   79.89    4.30
  -1   3  -3   22.50    2.10
   1   3   3   23.50    0.90
  -1   3  -3   22.90    2.70
   1   3   3   20.40    1.50
  -1   3  -3   23.20    1.20
   1   3   3   22.10    0.90
  -1   3  -3   25.70    1.80
   1   3   3   21.70    2.00
  -1   3  -3   22.20    1.20
  -1  -3  -3   25.70    1.40
   1  -3   3   21.90    1.10
   1  -3   3   22.10    1.20
   1  -3   3   23.30    2.10
  -1  -3  -3   22.30    1.50
   1  -3   3   22.10    1.20
   1  -3   3   22.10    1.80
  -1   3  -4  171.48    6.40
   1   3   4  166.18    7.40
  -1   3  -4  165.88    7.60
  -1   3  -4  169.18    5.40
  -1   3  -4  169.28   10.30
   1   3   4  166.08    6.00
   1   3   4  173.58    5.00
  -1   3  -4  177.58    5.50
   1   3   4  170.58    5.00
   1  -3   4  161.68    6.40
  -1  -3  -4  165.08    4.90
  -1  -3  -4  180.88    5.00
   1  -3   4  170.28    5.20
   1  -3   4  168.18    5.40
   1  -3   4  178.98    5.50
   1  -3   4  174.28    5.10
  -1  -3  -4  172.38    5.60
   1  -3   4  165.88    7.70
   1   3   5  442.46   14.00
  -1   3  -5  436.06   12.90
   1   3   5  444.86   12.40
  -1   3  -5  435.46   23.40
  -1   3  -5  421.36   17.00
   1   3   5  438.76   12.40
   1   3   5  432.46   14.00
   1   3   5  432.86   16.70
  -1   3  -5  448.16   14.60
  -1   3  -5  433.86   12.90
  -1  -3  -5  433.96   12.30
   1  -3   5  435.86   12.40
   1  -3   5  440.46   13.00
  -1  -3  -5  435.66   12.00
   1  -3   5  451.05   12.90
   1  -3   5  419.76   14.60
   1  -3   5  457.95   17.30
  -1  -3  -5  451.85   13.00
   1  -3   5  445.36   12.90
  -1  -3  -5  453.05   12.40
   1   3   6  192.78    5.70
  -1   3  -6  184.78    8.40
  -1   3  -6  188.78   11.40
   1   3   6  192.48    8.10
   1   3   6  186.88    6.60
  -1   3  -6  196.78    6.20
   1   3   6  194.08    5.70
   1   3   6  186.18    6.50
  -1   3  -6  186.68    6.20
  -1   3  -6  193.58    7.20
   1  -3   6  195.68    8.60
  -1  -3  -6  195.58    6.20
   1  -3   6  186.48    7.20
   1  -3   6  192.78    6.10
  -1  -3  -6  188.18    5.60
  -1  -3  -6  184.08    5.50
   1  -3   6  184.88    5.90
  -1  -3  -6  195.28    5.70
   1  -3   6  192.28    6.30
   1   3   7  314.77   10.30
  -1   3  -7  281.37   12.70
   1   3   7  313.07   12.50
  -1   3  -7  307.37   17.60
  -1   3  -7  323.57    9.80
   1   3   7  326.17   10.40
  -1   3  -7  318.87   11.10
   1   3   7  316.97    9.30
  -1   3  -7  327.87    9.90
   1   3   7  320.07    9.30
   1  -3   7  335.47    9.90
   1  -3   7  322.87   13.20
  -1  -3  -7  324.27    9.80
   1  -3   7  319.27    9.40
   1  -3   7  320.47    9.80
  -1  -3  -7  331.97    9.30
   1  -3   7  298.47   11.00
  -1  -3  -7  310.07    9.00
  -1   3  -8  437.66   13.00
   1   3   8  436.46   12.40
  -1   3  -8  405.16   16.70
   1   3   8  432.36   13.60
  -1   3  -8  416.76   12.90
  -1   3  -8  423.36   23.00
   1   3   8  425.96   12.40
   1   3   8  428.56   13.60
  -1  -3  -8  417.76   12.00
   1  -3   8  446.86   13.10
   1  -3   8  433.66   17.10
   1  -3   8  415.36   14.50
  -1  -3  -8  425.76   12.90
  -1  -3  -8  443.76   12.40
   1  -3   8  429.06   12.40
  -1   3  -9  144.49    7.20
  -1   3  -9  155.28    9.90
   1   3   9  153.58    5.50
  -1   3  -9  159.78    5.60
   1   3   9  154.48    5.00
   1   3   9  153.08    5.10
   1   3   9  157.88    5.50
  -1   3  -9  151.98    5.60
  -1  -3  -9  159.98    5.10
   1  -3   9  162.18    5.30
   1  -3   9  141.59    6.30
   1  -3   9  164.18    5.70
   1  -3   9  152.78    7.50
  -1  -3  -9  155.18    4.90
  -1   3 -10  242.48    8.00
   1   3  10  240.08    9.40
  -1   3 -10  245.98    8.10
   1   3  10  233.08    7.50
   1   3  10  245.08    8.00
  -1   3 -10  240.28   14.20
  -1   3 -10  230.28   10.20
   1   3  10  246.58    7.50
   1  -3  10  238.78    7.60
   1  -3  10  254.27   10.70
   1  -3  10  231.08    8.90
  -1  -3 -10  249.48    7.50
  -1  -3 -10  239.88    7.20
   1  -3  10  197.68    7.80
  -1   3 -11    1.10    0.80
  -1   3 -11    1.20    1.40
   1   3  11    1.20    0.60
   1   3  11    2.70    0.70
  -1   3 -11    1.40    0.80
  -1   3 -11    3.30    1.20
   1   3  11    3.00    0.80
   1   3  11    2.20    0.80
   1  -3  11    0.20    0.40
  -1  -3 -11    2.60    0.70
   1  -3  11    3.30    1.20
   1  -3  11    2.70    0.90
   1  -3  11    0.90    1.20
  -1  -3 -11    2.40    0.70
   1   3  12  261.77    8.30
  -1   3 -12  246.78   11.10
   1   3  12  266.97    8.80
  -1   3 -12  261.97    8.80
   1   3  12  248.48    8.30
  -1   3 -12  264.67   15.80
  -1   3 -12  256.07    8.90
   1   3  12  263.97   10.30
   1  -3  12  270.07    8.50
   1  -3  12  265.67   11.60
  -1  -3 -12  277.27    9.00
  -1  -3 -12  262.07    8.10
  -1  -3 -12  266.17    8.40
   1  -3  12  260.17    9.90
  -1   3 -13   58.59    2.90
   1   3  13   54.19    2.60
  -1   3 -13   46.50    2.80
   1   3  13   57.69    3.00
  -1   3 -13   52.79    5.40
   1   3  13   48.80    2.60
   1  -3  13   46.90    3.20
  -1  -3 -13   46.30    2.50
  -1  -3 -13   52.29    2.70
   1  -3  13   52.49    2.80
   1  -3  13   51.19    3.90
   1   3  14  166.68    6.20
   1   3  14  185.18    7.50
  -1   3 -14  164.88   11.80
  -1   3 -14  178.78    6.70
   1   3  14  172.98    6.30
  -1   3 -14  171.88    6.70
   1  -3  14  184.98    6.40
   1  -3  14  171.78    7.40
   1  -3  14  178.88    8.70
  -1  -3 -14  171.88    6.00
  -1  -3 -14  180.48    6.50
  -1   3 -15  155.38    6.20
   1   3  15  156.38    5.70
   1   3  15  147.79    5.60
  -1   3 -15  141.99    6.00
  -1   3 -15  139.09   10.80
  -1  -3 -15  151.88    5.50
   1  -3  15  151.68    5.70
   1  -3  15  150.98    6.80
  -1   3 -16  312.67   11.10
   1   3  16  300.97   10.20
  -1   3 -16  285.77   19.00
  -1   3 -16  320.07   10.80
  -1  -3 -16  320.37    9.90
   1  -3  16  322.57   10.20
  -1   3 -17   31.70    2.60
  -1   3 -17   26.40    4.80
  -1   3 -17   23.70    2.40
   1   3  17   28.80    2.20
   1  -3  17   27.70    2.40
  -1  -3 -17   23.10    2.10
  -1  -3 -17   26.60    3.60
  -1   3 -18   62.49    7.20
  -1   3 -18   79.29    4.30
  -1   3 -18   76.09    4.20
  -1  -3 -18   74.39    3.70
  -1  -3 -18   77.89    6.50
   1  -3  18   74.49    3.90
  -1   3 -19  122.79   11.20
  -1   3 -19  143.29    6.40
  -1   3 -19  144.09    6.30
   1  -3  19  152.28    5.90
  -1  -3 -19  152.88    5.80
  -1  -3 -19  138.59   10.10
  -1   3 -20    9.30    1.90
  -1   3 -20    8.90    1.80
  -1   3 -20   11.10    3.70
  -1  -3 -20    9.40    1.70
  -1  -3 -20   12.90    3.00
   1  -3  20   10.50    1.90
  -1   3 -21    9.90    2.00
  -1   3 -21    6.90    3.30
  -1   3 -21   10.90    2.00
  -1  -3 -21   11.90    3.10
   1  -3  21   10.30    2.00
  -1  -3 -21    8.30    1.70
  -1   3 -22   34.70    3.30
   1  -3  22   37.20    3.10
  -1  -3 -22   35.90    4.90
  -1  -3 -22   36.90    2.90
  -1   3 -23   41.30    3.50
  -1  -3 -23   39.50    5.20
  -1  -3 -23   46.40    3.20
  -1   3 -24   11.90    2.30
  -1  -3 -24   15.00    2.20
  -1  -3 -24   17.70    4.00
  -1   3 -25   18.70    2.70
  -1  -3 -25   20.30    2.50
  -1   3 -26    9.10    2.10
  -1  -3 -26   13.80    2.20
  -1   3 -27   29.70    3.40
  -1  -3 -27   28.60    3.10
  -1   3 -28   41.40    3.90
  -1  -3 -28   43.40    3.60
  -1   3 -29    8.70    2.40
  -1  -3 -29   10.10    2.30
  -1   3 -30   32.40    3.80
  -1  -3 -30   40.20    3.80
  -1   3 -31   26.70    3.70
  -1  -3 -31   35.10    3.70
  -1   3 -32   43.00    4.60
   1   3  32   50.79    3.80
  -1  -3 -32   58.49    4.40
   1   3  33   15.40    2.40
  -1   3 -33    9.90    3.20
  -1  -3 -33   11.90    2.60
   1   3  34   41.30    3.50
  -1   3 -34   29.70    4.50
   1   4 -33   11.00    3.40
   1   4 -32   36.00    4.40
   1  -4 -32   48.00    4.10
   1   4 -31   20.10    3.40
   1  -4 -31   19.40    2.80
   1   4 -30   39.00    4.30
   1  -4 -30   45.30    3.90
   1   4 -29   45.90    4.40
   1  -4 -29   61.59    4.30
   1   4 -28   51.19    4.40
   1  -4 -28   49.60    3.80
   1   4 -27   39.80    4.10
   1  -4 -27   42.60    3.50
   1   4 -26   75.89    5.10
   1  -4 -26   75.59    4.50
   1   4 -25   35.10    3.80
   1  -4 -25   38.10    3.20
   1   4 -24   46.80    3.90
   1  -4 -24   52.29    3.50
  -1  -4  24   53.89    3.90
   1   4 -23   40.20    3.60
   1  -4 -23   54.19    3.50
  -1  -4  23   47.30    3.50
   1   4 -22  121.39    6.30
   1  -4 -22  134.59    5.80
  -1  -4  22  132.99    6.00
   1   4 -21  156.58    7.30
  -1  -4  21  161.78    6.70
   1  -4 -21  163.18    6.50
   1   4 -20  103.29    5.50
  -1  -4  20  103.69    5.10
   1  -4 -20  114.69    4.90
   1   4 -19   41.30    3.20
   1  -4 -19   41.50    2.80
  -1  -4  19   44.50    3.20
   1   4 -18  220.58   15.50
   1   4 -18  229.58    8.80
  -1  -4  18  216.68    8.10
   1  -4 -18  225.78    7.80
   1   4 -17   41.00    5.60
   1   4 -17   52.59    3.20
  -1  -4  17   41.60    3.00
   1  -4 -17   46.50    2.70
   1   4 -16   63.99    3.40
   1   4 -16   55.69    6.30
  -1  -4  16   57.99    3.40
   1  -4 -16   56.69    3.00
   1   4 -15   52.89    5.80
   1  -4 -15   49.99    2.70
  -1  -4  15   53.79    3.10
   1   4 -14   68.19    6.50
   1   4 -14   69.99    3.70
  -1  -4  14   66.39    3.50
   1  -4 -14   70.79    3.10
  -1   4  13   68.29    3.10
   1   4 -13   71.79    3.70
   1   4 -13   69.49    6.50
  -1  -4  13   72.79    3.50
  -1  -4  13   74.49    3.50
   1  -4 -13   72.09    3.10
  -1   4  12   12.20    1.50
   1   4 -12   12.40    1.60
  -1   4  12   12.10    1.50
  -1   4  12   11.60    1.20
   1   4 -12   13.20    3.10
  -1  -4  12   12.20    1.50
   1  -4 -12   10.30    1.20
  -1  -4  12   11.70    1.50
   1   4 -11    4.70    2.00
  -1   4  11    5.20    1.10
   1   4 -11    4.20    1.10
  -1   4  11    4.10    1.40
  -1   4  11    4.70    0.80
  -1   4  11    6.00    0.80
  -1   4  11    4.60    1.00
   1  -4 -11    4.40    0.80
  -1  -4  11    4.70    1.40
  -1  -4  11    4.50    1.10
  -1  -4  11    4.30    0.90
   1  -4 -11    5.70    1.20
  -1   4  10   11.80    1.10
  -1   4  10   16.40    2.10
  -1   4  10   12.30    1.50
  -1   4  10   14.20    1.60
  -1   4  10   14.40    1.10
   1   4 -10   16.20    1.70
   1   4 -10   11.60    2.80
   1  -4 -10   13.50    1.00
   1  -4 -10   13.70    1.20
  -1  -4  10   13.10    1.90
   1  -4 -10   13.50    1.60
  -1  -4  10   12.80    1.50
  -1  -4  10   13.80    1.40
  -1   4   9   44.20    3.10
  -1   4   9   44.80    2.50
   1   4  -9   40.50    4.50
  -1   4   9   42.10    1.90
   1   4  -9   44.70    2.50
  -1   4   9   41.30    2.50
  -1   4   9   41.50    1.80
  -1  -4   9   42.30    3.00
  -1  -4   9   44.40    2.40
   1  -4  -9   46.20    1.70
  -1  -4   9   42.70    2.10
   1  -4  -9   44.50    2.60
   1  -4  -9   43.70    1.90
  -1   4   8  320.27    9.50
  -1   4   8  335.27    9.40
   1   4  -8  308.57   18.70
  -1   4   8  323.17   13.10
   1   4  -8  319.97   10.30
  -1   4   8  332.57   11.10
  -1   4   8  330.87   11.20
  -1  -4   8  318.27   11.80
   1  -4  -8  335.57   10.50
  -1  -4   8  331.77    9.90
  -1  -4   8  331.37   10.10
   1  -4  -8  327.87    9.30
  -1   4   7  135.99    6.70
  -1   4   7  138.69    4.30
   1   4  -7  141.29    5.10
   1   4  -7  149.59    5.20
  -1   4   7  141.99    4.30
  -1   4   7  148.69    5.70
  -1   4   7  142.79    5.60
   1   4  -7  131.19    9.60
  -1  -4   7  148.09    5.20
  -1  -4   7  145.99    4.90
   1  -4  -7  141.19    4.30
  -1  -4   7  144.29    7.50
  -1  -4   7  143.49    6.20
   1  -4  -7  142.49    5.30
  -1  -4   7  142.79    4.70
   1   4  -6  387.56   22.80
  -1   4   6  422.26   13.80
  -1   4   6  411.96   16.20
   1   4  -6  428.66   12.60
   1   4  -6  412.66   12.40
  -1   4   6  410.16   13.70
   1  -4  -6  413.36   11.30
  -1  -4   6  423.86   17.00
  -1  -4   6  414.36   12.20
  -1  -4   6  412.86   12.00
   1  -4  -6  417.86   11.20
  -1  -4   6  399.26   14.20
   1  -4  -6  415.26   12.80
  -1  -4   6  417.76   12.40
  -1   4   5  402.66   16.20
  -1   4   5  410.66   13.80
   1   4  -5  419.56   12.40
   1   4  -5  406.26   12.30
   1   4  -5  405.36   22.80
  -1   4   5  417.36   13.80
  -1  -4   5  422.56   12.20
  -1  -4   5  404.16   14.20
  -1  -4   5  412.26   16.80
   1  -4  -5  424.56   12.70
  -1  -4   5  410.16   11.80
  -1   4   4  331.77   13.50
   1   4  -4  350.66   10.10
   1   4  -4  310.07   18.90
   1   4  -4  340.77   10.00
  -1   4   4  343.87   11.50
   1   4  -4  334.87   13.90
  -1  -4   4  331.87   14.00
   1  -4  -4  333.37   10.50
  -1  -4   4  329.57   11.70
  -1  -4   4  336.37   10.00
  -1  -4   4  322.07    9.60
  -1  -4   4  334.87    9.90
   1   4  -3  515.75   14.60
   1   4  -3  501.45   14.40
   1   4  -3  510.85   16.60
  -1   4   3  516.05   16.50
   1   4  -3  504.45   19.70
   1   4  -3  484.45   27.10
  -1   4   3  494.15   19.40
  -1   4   3  484.55   26.80
   1  -4  -3  505.95   15.10
  -1  -4   3  505.75   14.00
  -1  -4   3  511.85   19.90
  -1  -4   3  468.85   16.60
  -1  -4   3  517.75   14.40
  -1   4   2  257.17   11.20
  -1   4   2  277.47    9.50
   1   4  -2  280.67    9.60
  -1   4   2  254.47   15.40
   1   4  -2  257.97   11.40
   1   4  -2  259.17   15.70
   1   4  -2  269.17    8.00
   1   4  -2  266.57    7.90
   1  -4  -2  268.87   11.20
  -1  -4   2  272.47    7.80
  -1  -4   2  256.47    9.50
   1  -4  -2  261.17    9.40
   1  -4  -2  265.37    8.60
  -1  -4   2  272.47   11.60
  -1  -4   2  260.77    7.60
   1   4  -1    5.70    1.20
  -1   4   1    6.90    1.60
   1   4  -1    5.80    2.10
   1   4  -1    5.40    0.60
  -1   4   1    7.20    2.00
  -1   4   1    6.70    1.30
   1   4  -1    6.10    0.70
   1   4  -1    4.50    1.50
  -1  -4   1    5.10    0.60
   1  -4  -1    3.70    1.30
  -1  -4   1    5.30    1.20
   1  -4  -1    6.70    1.10
  -1  -4   1    6.10    1.10
   1  -4  -1    7.40    1.30
  -1  -4   1    6.60    1.70
  -1  -4   1    6.00    0.70
   1   4   0   56.29    2.00
   1   4   0   55.99    1.90
   1   4   0   51.89    3.70
   1   4   0   52.89    2.90
  -1   4   0   55.69    3.70
   1   4   0   51.49    4.90
  -1   4   0   55.39    3.10
  -1   4   0   44.00    4.60
  -1  -4   0   51.79    2.90
  -1  -4   0   54.99    1.80
   1  -4   0   52.09    2.60
  -1  -4   0   51.79    1.90
   1  -4   0   50.29    2.90
  -1  -4   0   54.09    2.60
   1  -4   0   52.69    1.70
   1  -4   0   54.79    3.70
   1   4   1    5.50    1.10
   1   4   1    4.10    1.40
  -1   4  -1    3.50    1.70
  -1   4  -1    4.90    0.60
  -1   4  -1    5.10    1.50
  -1   4  -1    5.90    1.20
   1   4   1    5.30    0.50
   1   4   1    4.90    1.90
  -1   4  -1    4.60    0.50
   1   4   1    5.70    0.50
   1  -4   1    4.50    0.60
   1  -4   1    5.80    1.60
  -1  -4  -1    5.40    1.20
   1  -4   1    5.60    1.20
   1  -4   1    6.70    1.10
  -1  -4  -1    4.80    1.00
  -1  -4  -1    5.10    0.50
  -1   4  -2  260.37   11.20
   1   4   2  238.68   15.20
  -1   4  -2  260.27    7.70
  -1   4  -2  271.47    7.70
  -1   4  -2  256.87   15.30
   1   4   2  264.37    9.20
   1   4   2  247.88   11.10
   1  -4   2  264.17   11.30
  -1  -4  -2  267.97    8.40
  -1  -4  -2  266.07    7.20
   1  -4   2  277.07    7.60
   1  -4   2  252.67    7.40
   1  -4   2  259.57    9.50
  -1  -4  -2  262.37    9.20
  -1   4  -3  481.25   27.00
   1   4   3  520.95   16.40
   1   4   3  502.55   19.50
  -1   4  -3  522.95   14.50
  -1   4  -3  500.25   19.70
  -1   4  -3  491.55   14.40
  -1  -4  -3  502.25   15.00
  -1  -4  -3  490.65   13.60
   1  -4   3  486.35   16.70
   1  -4   3  520.15   14.40
   1  -4   3  509.65   13.90
   1  -4   3  508.65   19.80
  -1  -4  -3  499.85   16.30
   1   4   4  338.47   13.60
  -1   4  -4  324.27    9.90
   1   4   4  341.37   11.30
  -1   4  -4  308.47   18.60
  -1   4  -4  344.97    9.90
  -1   4  -4  321.27   13.70
   1  -4   4  331.87   11.70
  -1  -4  -4  329.57   10.30
  -1  -4  -4  329.27    9.10
   1  -4   4  347.57    9.90
   1  -4   4  329.37    9.50
   1  -4   4  333.57   13.90
   1   4   5  410.36   16.40
   1   4   5  421.16   11.70
  -1   4  -5  416.86   12.30
  -1   4  -5  413.76   12.30
   1   4   5  404.16   11.70
  -1   4  -5  397.06   22.80
   1   4   5  414.86   13.70
   1  -4   5  420.96   17.00
   1  -4   5  421.86   14.40
   1  -4   5  420.36   12.30
   1  -4   5  414.46   11.90
  -1  -4  -5  424.36   12.60
  -1  -4  -5  415.46   11.40
  -1   4  -6  434.66   12.60
   1   4   6  407.56   13.70
   1   4   6  425.16   11.80
   1   4   6  421.06   13.70
   1   4   6  413.96   11.80
  -1   4  -6  408.26   12.50
   1   4   6  417.26   16.50
  -1   4  -6  393.16   22.90
   1  -4   6  415.56   12.00
   1  -4   6  434.76   17.20
  -1  -4  -6  421.06   12.70
   1  -4   6  409.06   14.40
   1  -4   6  428.86   12.50
  -1  -4  -6  413.56   11.50
   1   4   7  141.59    5.40
   1   4   7  142.09    4.40
  -1   4  -7  139.29    5.00
   1   4   7  145.19    6.90
   1   4   7  141.59    5.50
  -1   4  -7  132.09    9.50
  -1   4  -7  144.49    5.10
   1   4   7  141.19    4.40
   1  -4   7  135.19    7.30
   1  -4   7  141.29    4.80
  -1  -4  -7  140.29    5.20
  -1  -4  -7  140.89    4.30
   1  -4   7  144.89    5.10
   1  -4   7  136.79    6.10
   1  -4   7  140.89    4.60
  -1  -4  -7  146.99    4.30
   1   4   8  327.17   10.90
  -1   4  -8  315.17   18.70
   1   4   8  320.57   13.30
   1   4   8  340.77    9.60
  -1   4  -8  325.77   10.30
   1   4   8  327.27   11.00
   1   4   8  334.37    9.60
   1  -4   8  333.77   10.00
  -1  -4  -8  337.37    9.50
   1  -4   8  320.77    9.80
  -1  -4  -8  321.97    9.30
   1  -4   8  306.57   11.80
  -1  -4  -8  321.37   10.30
   1   4   9   44.20    2.40
  -1   4  -9   43.70    2.40
   1   4   9   42.70    1.90
   1   4   9   42.60    1.90
   1   4   9   43.20    2.40
  -1   4  -9   43.50    4.70
   1   4   9   41.60    3.10
  -1  -4  -9   45.30    1.90
  -1  -4  -9   45.40    2.50
   1  -4   9   42.50    2.30
   1  -4   9   43.80    2.10
  -1  -4  -9   40.30    1.90
   1  -4   9   42.30    3.10
  -1   4 -10   10.90    1.40
   1   4  10   12.00    1.10
   1   4  10   14.70    1.50
   1   4  10   12.00    1.10
   1   4  10   13.00    1.40
   1   4  10   13.70    2.00
  -1   4 -10   11.50    2.80
   1  -4  10   16.00    1.60
  -1  -4 -10   12.70    1.20
   1  -4  10   15.00    2.10
   1  -4  10   13.50    1.30
  -1  -4 -10   14.20    1.10
   1   4  11    4.60    1.30
   1   4  11    5.80    1.00
   1   4  11    3.50    0.80
  -1   4 -11    4.80    2.20
  -1   4 -11    4.10    1.10
   1   4  11    5.20    0.80
  -1  -4 -11    4.00    0.80
   1  -4  11    4.60    1.40
   1  -4  11    3.10    1.00
   1  -4  11    4.30    1.00
   1   4  12   13.50    1.70
  -1   4 -12   12.80    1.60
   1   4  12   13.10    2.00
  -1   4 -12   11.60    2.90
   1   4  12   11.10    1.20
   1  -4  12    8.80    1.40
   1  -4  12   11.80    1.40
  -1  -4 -12    9.70    1.20
  -1   4 -13   78.19    6.80
   1   4  13   69.89    3.10
  -1   4 -13   68.29    3.60
   1  -4  13   71.29    3.50
  -1  -4 -13   75.79    3.20
  -1   4 -14   73.19    6.80
  -1   4 -14   69.89    3.70
   1  -4  14   71.09    3.50
  -1  -4 -14   70.29    3.20
  -1   4 -15   49.99    5.80
   1  -4  15   51.99    3.10
  -1  -4 -15   51.89    2.70
  -1   4 -16   54.69    6.30
  -1  -4 -16   60.59    3.10
   1  -4  16   58.69    3.30
  -1   4 -17   41.00    5.70
  -1   4 -17   51.19    3.30
  -1  -4 -17   48.10    2.80
   1  -4  17   48.20    3.10
  -1   4 -18  242.88    9.00
  -1   4 -18  201.58   15.40
   1  -4  18  227.58    8.20
  -1  -4 -18  223.08    7.80
  -1   4 -19   41.40    3.20
   1  -4  19   34.90    2.90
  -1  -4 -19   41.10    2.80
  -1   4 -20  104.69    5.50
   1  -4  20  104.69    5.10
  -1  -4 -20  101.79    4.70
  -1   4 -21  171.78    7.50
   1  -4  21  162.48    6.80
  -1  -4 -21  157.58    6.40
  -1   4 -22  116.89    6.30
  -1  -4 -22  134.59    5.70
   1  -4  22  131.79    6.00
  -1   4 -23   41.60    3.60
   1  -4  23   52.79    3.70
  -1  -4 -23   48.20    3.40
  -1   4 -24   50.19    4.00
  -1  -4 -24   51.49    3.60
   1  -4  24   56.09    3.90
  -1   4 -25   48.80    4.00
  -1  -4 -25   46.80    3.40
  -1   4 -26   76.79    5.10
  -1  -4 -26   74.79    4.50
  -1   4 -27   43.10    4.00
  -1  -4 -27   44.30    3.60
  -1   4 -28   57.09    4.50
  -1  -4 -28   53.09    3.90
  -1   4 -29   46.70    4.30
  -1  -4 -29   60.89    4.30
  -1   4 -30   38.40    4.30
  -1  -4 -30   50.99    4.00
  -1   4 -31   21.90    3.50
  -1  -4 -31   21.80    3.00
  -1   4 -32   36.10    4.40
  -1  -4 -32   41.80    4.10
  -1   4 -33   13.40    3.50
   1   5 -31   13.40    3.10
   1   5 -30   15.80    3.20
   1  -5 -30   19.20    2.80
   1   5 -29    9.90    2.70
   1  -5 -29   16.60    2.70
   1   5 -28   28.70    3.70
   1  -5 -28   27.00    3.10
   1   5 -27   21.70    3.30
   1  -5 -27   22.90    2.80
   1   5 -26    5.10    2.10
   1  -5 -26    9.00    2.00
  -1  -5  26   14.90    2.60
   1   5 -25   20.90    3.10
   1  -5 -25   22.30    2.60
  -1  -5  25   21.70    2.90
   1   5 -24   16.70    2.80
  -1  -5  24   20.30    2.80
   1  -5 -24   16.80    2.30
   1   5 -23   18.80    2.90
   1  -5 -23   26.10    2.70
  -1  -5  23   24.30    2.90
   1   5 -22   23.40    3.00
   1  -5 -22   21.90    2.40
  -1  -5  22   22.80    2.70
  -1  -5  21   22.80    2.80
   1  -5 -21   30.40    2.50
   1  -5 -20   52.19    3.20
  -1  -5  20   48.00    3.50
  -1  -5  19   59.29    3.80
   1  -5 -19   55.29    3.30
  -1  -5  18  147.99    6.40
   1  -5 -18  150.38    5.80
  -1  -5  17  108.79    5.20
   1  -5 -17  105.29    4.50
   1  -5 -16  166.38    5.90
  -1  -5  16  153.18    6.40
   1  -5 -15  143.59    5.40
  -1  -5  15  152.08    6.10
   1   5 -14  180.78   12.60
  -1  -5  14  168.58    6.50
   1  -5 -14  160.28    5.80
   1   5 -13   70.09    7.00
   1  -5 -13   64.39    3.00
  -1  -5  13   69.59    3.60
   1   5 -12  166.98   11.70
   1  -5 -12  158.88    6.30
   1  -5 -12  160.08    5.40
  -1  -5  12  159.58    6.00
   1   5 -11   40.10    5.20
   1  -5 -11   43.20    2.80
  -1  -5  11   38.60    2.60
   1  -5 -11   38.90    2.00
   1   5 -10  156.38   11.40
  -1   5  10  161.48    4.90
  -1   5  10  161.78    5.00
  -1  -5  10  167.38    5.90
   1  -5 -10  160.38    5.10
   1  -5 -10  165.98    6.30
   1   5  -9   50.59    5.70
   1  -5  -9   48.40    2.10
   1  -5  -9   53.09    3.00
  -1  -5   9   49.30    2.80
  -1  -5   9   49.30    2.00
   1   5  -8  288.17   17.60
  -1   5   8  286.07   12.20
  -1   5   8  279.47   10.10
   1  -5  -8  282.77    8.10
   1  -5  -8  283.57    9.50
  -1  -5   8  285.67    9.00
  -1   5   7  130.99    5.50
   1   5  -7  125.29    4.70
   1   5  -7  121.39    9.50
  -1  -5   7  132.59    4.70
  -1  -5   7  129.29    6.10
   1  -5  -7  126.29    3.90
   1  -5  -7  137.29    5.30
   1  -5  -7  127.69    3.80
   1   5  -6   73.89    3.10
  -1   5   6   74.39    3.80
   1   5  -6   73.79    6.80
  -1  -5   6   71.39    3.10
   1  -5  -6   73.59    3.60
  -1  -5   6   76.09    4.30
   1   5  -5  213.98   14.00
  -1   5   5  209.68   13.60
   1   5  -5  214.28    6.90
  -1   5   5  210.98    8.20
  -1  -5   5  218.58    6.80
   1  -5  -5  217.08    7.50
  -1  -5   5  214.28    8.60
   1   5  -4   70.79    2.80
   1   5  -4   61.29    6.30
  -1   5   4   73.69    6.40
  -1  -5   4   76.49    4.10
   1  -5  -4   72.39    3.40
  -1  -5   4   67.79    2.80
   1   5  -3   56.29    5.80
   1   5  -3   59.39    2.40
  -1   5   3   56.89    5.70
   1   5  -3   61.99    2.50
  -1  -5   3   62.29    3.10
  -1  -5   3   62.69    3.60
   1  -5  -3   61.19    3.20
  -1  -5   3   58.69    2.40
   1   5  -2   47.70    2.00
   1   5  -2   42.50    1.80
   1   5  -2   37.60    4.70
  -1   5   2   40.00    4.60
  -1  -5   2   42.10    1.90
  -1  -5   2   44.20    2.60
  -1  -5   2   40.20    2.90
   1  -5  -2   45.80    2.60
   1  -5  -2   46.70    2.90
   1   5  -1    7.00    0.70
   1   5  -1    5.40    2.20
  -1   5   1    6.00    2.30
   1   5  -1    7.00    0.80
  -1  -5   1    6.40    1.20
  -1  -5   1    6.20    0.80
   1  -5  -1    6.30    1.30
   1  -5  -1    6.70    1.40
  -1  -5   1    5.10    1.30
  -1   5   0    5.10    2.10
   1   5   0    4.90    2.10
   1   5   0    5.50    0.50
   1   5   0    5.80    0.60
  -1  -5   0    6.20    1.20
   1  -5   0    5.30    0.60
  -1  -5   0    4.90    0.70
   1  -5   0    6.00    0.70
  -1  -5   0    4.70    0.70
  -1  -5   0    5.60    1.30
   1  -5   0    4.00    1.10
   1  -5   0    4.30    1.30
  -1   5  -1    6.50    2.40
   1   5   1    5.70    2.40
  -1   5  -1    6.80    0.60
  -1   5  -1    6.00    0.50
   1  -5   1    7.20    1.30
   1  -5   1    5.70    0.70
  -1  -5  -1    7.00    0.70
  -1  -5  -1    5.10    1.20
   1  -5   1    7.20    0.80
  -1  -5  -1    5.50    1.30
  -1  -5  -1    6.10    0.70
   1  -5   1    6.70    1.40
  -1   5  -2   42.90    1.70
  -1   5  -2   45.80    1.80
   1   5   2   45.90    5.00
  -1   5  -2   43.80    4.90
  -1  -5  -2   40.00    2.70
  -1  -5  -2   42.10    1.60
   1  -5   2   43.30    1.80
  -1  -5  -2   42.10    2.40
   1  -5   2   41.50    3.00
   1  -5   2   48.80    2.80
  -1  -5  -2   41.20    1.60
   1   5   3   59.99    5.90
  -1   5  -3   58.19    5.70
  -1   5  -3   60.79    2.30
  -1   5  -3   59.39    2.30
   1  -5   3   57.49    3.60
  -1  -5  -3   58.59    3.20
  -1  -5  -3   57.89    2.00
  -1  -5  -3   55.99    2.90
   1  -5   3   58.29    2.40
  -1  -5  -3   60.79    2.00
   1  -5   3   59.89    3.10
   1   5   4   73.39    6.60
  -1   5  -4   69.39    2.70
  -1   5  -4   70.39    6.50
  -1   5  -4   75.29    2.90
  -1  -5  -4   73.59    2.30
   1  -5   4   66.89    4.00
  -1  -5  -4   71.29    2.40
   1  -5   4   73.99    2.90
  -1  -5  -4   74.49    3.40
  -1   5  -5  213.18    6.90
  -1   5  -5  219.68   14.00
  -1  -5  -5  214.48    7.40
   1  -5   5  202.48    8.60
  -1  -5  -5  211.88    6.20
  -1  -5  -5  224.58    6.10
   1  -5   5  220.48    6.80
   1   5   6   76.59    3.80
  -1   5  -6   74.99    6.90
  -1   5  -6   79.89    3.20
  -1  -5  -6   75.79    3.50
   1  -5   6   72.49    3.10
  -1  -5  -6   74.49    2.50
   1  -5   6   74.09    4.30
  -1  -5  -6   72.19    2.50
  -1   5  -7  123.99    4.70
  -1   5  -7  132.89    9.80
  -1  -5  -7  125.79    4.00
   1  -5   7  129.19    4.70
  -1  -5  -7  139.79    5.20
   1   5   8  300.47    8.30
  -1   5  -8  285.27   17.60
   1   5   8  287.37    8.30
  -1  -5  -8  281.07    8.30
   1  -5   8  280.77    9.00
  -1  -5  -8  301.07    9.70
  -1   5  -9   53.49    5.60
   1   5   9   48.60    2.00
   1   5   9   51.89    1.90
  -1  -5  -9   47.10    2.10
  -1  -5  -9   50.69    2.90
   1  -5   9   45.10    2.60
  -1   5 -10  163.58   11.60
  -1  -5 -10  171.58    6.30
   1  -5  10  167.88    6.00
  -1  -5 -10  162.78    5.30
  -1   5 -11   38.70    4.90
   1  -5  11   33.20    2.40
  -1  -5 -11   40.60    2.10
  -1   5 -12  164.18   11.70
   1  -5  12  158.58    6.00
  -1  -5 -12  162.98    5.40
  -1   5 -13   70.49    6.90
   1  -5  13   65.99    3.50
  -1  -5 -13   65.59    3.00
  -1   5 -14  174.18   12.20
  -1  -5 -14  151.78    5.60
   1  -5  14  164.38    6.30
   1  -5  15  143.99    5.90
  -1  -5 -15  143.79    5.30
  -1  -5 -16  157.18    5.80
   1  -5  16  156.18    6.30
  -1  -5 -17  108.59    4.60
   1  -5  17  107.09    5.00
  -1  -5 -18  154.78    6.00
   1  -5  18  154.28    6.50
   1  -5  19   52.89    3.60
  -1  -5 -19   58.59    3.30
  -1  -5 -20   46.90    3.20
   1  -5  20   48.50    3.40
   1  -5  21   23.40    2.70
  -1  -5 -21   21.70    2.30
  -1   5 -22   21.20    2.90
  -1  -5 -22   24.20    2.60
   1  -5  22   24.00    2.80
  -1   5 -23   23.30    3.10
   1  -5  23   17.90    2.60
  -1  -5 -23   17.90    2.30
  -1   5 -24   17.40    2.90
   1  -5  24   20.10    2.80
  -1  -5 -24   20.30    2.50
  -1   5 -25   21.70    3.10
  -1  -5 -25   22.50    2.70
   1  -5  25   23.40    3.00
  -1   5 -26    8.30    2.40
  -1  -5 -26   12.40    2.20
   1  -5  26    8.40    2.30
  -1   5 -27   22.30    3.30
  -1  -5 -27   25.30    2.90
  -1   5 -28   30.00    3.80
  -1  -5 -28   25.60    3.00
  -1   5 -29   16.10    3.10
  -1  -5 -29   13.90    2.40
  -1   5 -30   17.00    3.20
  -1  -5 -30   24.00    3.20
  -1   5 -31    7.10    2.70
   1   6 -28   23.50    3.60
   1  -6 -28   23.00    2.90
   1   6 -27    7.30    2.50
   1  -6 -27    7.80    2.00
  -1  -6  27    8.70    2.40
   1   6 -26   23.40    3.50
   1  -6 -26   16.20    2.50
  -1  -6  26   23.10    3.10
  -1  -6  25    7.30    2.30
   1  -6 -25    6.70    1.80
  -1  -6  24   30.30    3.30
   1  -6 -24   24.50    2.70
   1  -6 -23    2.40    1.40
  -1  -6  23    2.70    1.70
   1  -6 -22   30.80    2.90
  -1  -6  22   28.70    3.30
  -1  -6  21   28.20    3.20
   1  -6 -21   37.20    2.90
  -1  -6  20   72.09    4.30
   1  -6 -20   67.09    3.80
  -1  -6  19   16.00    2.30
   1  -6 -19   12.20    1.80
  -1  -6  18   26.30    2.80
   1  -6 -18   29.90    2.40
  -1  -6  17   21.90    2.50
   1  -6 -17   21.00    2.00
   1  -6 -16   33.40    2.30
  -1  -6  16   26.40    2.70
   1  -6 -15   33.00    2.20
  -1  -6  15   33.80    2.80
   1  -6 -14    0.90    0.90
  -1  -6  14    0.50    1.10
   1  -6 -13   12.00    1.30
  -1  -6  13    9.20    1.70
   1  -6 -12    9.20    1.80
  -1  -6  12   11.90    1.70
   1  -6 -12   11.80    1.20
  -1  -6  11    8.40    1.50
   1  -6 -11    7.80    1.00
   1  -6 -11    7.30    1.60
  -1  -6  10    6.30    1.40
   1  -6 -10    9.90    1.70
   1  -6 -10    8.30    1.00
   1  -6  -9   37.20    1.70
   1  -6  -9   39.80    2.80
  -1  -6   9   38.90    2.50
   1   6  -8   54.19    6.20
  -1  -6   8   52.59    2.90
   1  -6  -8   54.79    3.30
   1  -6  -8   52.89    2.00
  -1   6   7   14.30    3.70
   1   6  -7   15.00    3.80
  -1  -6   7   15.50    1.70
   1  -6  -7   12.90    1.00
   1  -6  -7   18.50    2.20
   1   6  -6  176.18   12.80
  -1   6   6  169.28   12.40
   1  -6  -6  175.78    6.80
  -1  -6   6  184.08    6.10
   1   6  -5  150.68   11.40
  -1   6   5  145.19   11.10
   1  -6  -5  155.88    6.10
  -1  -6   5  147.19    5.20
  -1   6   4   74.69    7.20
   1   6  -4   78.39    7.70
  -1  -6   4   73.39    3.20
   1  -6  -4   79.19    3.90
   1   6  -3  111.49    9.40
  -1   6   3  113.79    9.40
   1  -6  -3  109.79    5.00
  -1  -6   3  115.79    4.10
  -1   6   2  122.09    9.80
   1   6  -2  119.19    9.90
   1  -6  -2  129.49    5.30
  -1  -6   2  124.69    4.30
   1   6  -1   17.00    3.90
  -1   6   1   14.50    3.80
   1  -6  -1   19.50    2.20
  -1  -6   1   15.60    1.30
   1  -6  -1   15.40    1.10
  -1   6   0   -2.00    1.60
   1   6   0   -0.60    1.90
  -1  -6   0    1.10    1.20
   1  -6   0   -0.30    0.60
   1  -6   0   -0.80    1.10
  -1  -6   0    0.80    0.60
  -1   6  -1   18.20    4.10
   1   6   1   16.40    3.90
   1  -6   1   17.80    2.10
  -1  -6  -1   20.90    2.50
  -1  -6  -1   18.90    1.20
   1  -6   1   14.40    1.30
  -1   6  -2  120.29    9.80
   1   6   2  123.59   10.00
  -1  -6  -2  133.29    4.00
   1  -6   2  122.29    4.20
   1  -6   2  126.29    5.50
   1   6   3  124.29    9.90
  -1   6  -3  108.49    9.40
   1  -6   3  127.69    5.30
  -1  -6  -3  116.19    3.80
   1  -6   3  124.49    4.20
   1   6   4   76.79    7.50
  -1   6  -4   80.69    7.70
  -1  -6  -4   75.59    2.70
   1  -6   4   78.79    4.10
   1  -6   4   79.69    3.20
  -1   6  -5  156.68   11.60
   1   6   5  150.88   11.50
   1  -6   5  163.78    6.40
   1  -6   5  154.28    5.30
  -1  -6  -5  152.58    4.70
  -1   6  -6  182.58   12.70
   1   6   6  170.58   12.60
  -1  -6  -6  172.78    5.20
   1  -6   6  176.88    6.00
  -1   6  -7   16.80    4.00
  -1  -6  -7   12.50    1.10
   1  -6   7   18.30    1.70
  -1   6  -8   56.89    6.30
   1  -6   8   53.49    2.80
  -1  -6  -8   48.00    2.10
  -1  -6  -9   36.60    1.80
   1  -6   9   45.00    2.60
   1  -6  10    5.70    1.30
  -1  -6 -10    7.50    1.00
   1  -6  11    6.90    1.40
  -1  -6 -11    8.20    1.10
  -1  -6 -12   14.00    1.40
   1  -6  12   13.10    1.80
   1  -6  13   10.60    1.80
  -1  -6 -13    9.70    1.30
  -1  -6 -14    1.20    0.90
   1  -6  14    3.30    1.40
   1  -6  15   36.70    2.80
  -1  -6 -15   29.30    2.10
   1  -6  16   25.30    2.60
  -1  -6 -16   31.30    2.30
   1  -6  17   17.80    2.30
  -1  -6 -17   16.30    1.90
   1  -6  18   29.80    3.00
  -1  -6 -18   28.40    2.40
  -1  -6 -19   14.00    1.90
   1  -6  19   13.60    2.30
  -1  -6 -20   71.09    3.90
   1  -6  20   69.49    4.30
   1  -6  21   28.60    3.10
  -1  -6 -21   33.50    2.80
   1  -6  22   29.40    3.20
  -1  -6 -22   24.90    2.70
  -1  -6 -23    0.00    1.40
   1  -6  23    2.00    1.70
   1  -6  24   26.50    3.20
  -1  -6 -24   27.70    2.90
  -1  -6 -25    5.00    1.70
   1  -6  25    6.80    2.10
  -1   6 -26   17.50    3.10
   1  -6  26   24.00    3.20
  -1  -6 -26   21.40    2.70
  -1   6 -27   10.40    2.60
   1  -6  27    9.50    2.40
  -1  -6 -27    5.70    1.90
  -1   6 -28   19.70    3.40
   1  -6  28   31.50    3.80
  -1  -6 -28   26.40    3.20
  -1  -7  24   -0.50    1.70
   1  -7 -24    3.80    1.60
  -1  -7  23   10.30    2.40
   1  -7 -23    9.80    1.90
   1  -7 -22    5.00    1.60
  -1  -7  22    5.90    1.90
   1  -7 -21    1.90    1.30
  -1  -7  21    3.00    1.60
  -1  -7  20   22.70    2.80
   1  -7 -20   20.70    2.30
  -1  -7  19   43.70    3.60
   1  -7 -19   45.20    3.00
   1  -7 -18   20.70    2.20
  -1  -7  18   18.30    2.50
   1  -7 -17   27.30    2.30
  -1  -7  17   21.20    2.70
  -1  -7  16   11.40    2.00
   1  -7 -16   10.20    1.50
  -1  -7  15   10.30    1.90
   1  -7 -15   10.30    1.40
  -1  -7  14   -0.80    1.20
   1  -7 -14    1.10    0.90
   1  -7 -13    8.40    1.10
  -1  -7  13    8.70    1.70
  -1  -7  12    2.60    1.30
   1  -7 -12    2.00    0.80
  -1  -7  11   18.80    2.10
   1  -7 -11   19.40    1.40
  -1  -7  10   12.70    1.80
   1  -7 -10   10.00    1.00
  -1  -7   9   31.10    2.50
  -1  -7   8   39.40    2.70
  -1  -7   7   22.70    2.10
  -1  -7   6   13.70    1.70
  -1  -7   5   27.90    2.10
  -1  -7   4    8.40    1.30
  -1  -7   3    4.50    1.00
  -1  -7   2   21.40    1.70
  -1  -7   1    4.40    0.90
   1  -7  -1    4.20    0.80
  -1  -7   0    4.60    0.90
   1  -7   0    5.50    0.90
   1  -7   1    3.60    0.90
  -1  -7  -1    3.90    0.80
  -1  -7  -2   21.50    1.40
   1  -7   2   21.70    1.60
   1  -7   3    3.40    0.90
  -1  -7  -3    2.20    0.60
  -1  -7  -4    9.90    0.90
   1  -7   4   11.70    1.30
  -1  -7  -5   28.50    1.40
   1  -7   5   28.30    2.00
   1  -7   6   17.70    1.80
  -1  -7  -6   19.60    1.20
   1  -7   7   24.80    2.20
  -1  -7  -7   25.60    1.50
   1  -7   8   36.10    2.60
  -1  -7  -8   40.10    1.90
   1  -7   9   27.70    2.40
  -1  -7  -9   31.30    1.70
  -1  -7 -10    9.90    1.10
   1  -7  10   10.80    1.80
  -1  -7 -11   19.80    1.60
   1  -7  11   22.90    2.30
  -1  -7 -12    2.00    0.80
   1  -7  12    1.60    1.30
  -1  -7 -13    6.40    1.10
   1  -7  13    5.90    1.60
   1  -7  14    1.10    1.30
  -1  -7 -14    0.40    0.90
  -1  -7 -15   10.30    1.50
   1  -7  15    7.00    1.80
   1  -7  16    8.00    1.90
  -1  -7 -16   14.40    1.70
  -1  -7 -17   28.50    2.30
   1  -7  17   22.30    2.70
   1  -7  18    9.80    2.10
  -1  -7 -18   16.00    1.90
  -1  -7 -19   47.50    3.10
   1  -7  19   45.50    3.60
  -1  -7 -20   19.80    2.20
   1  -7  20   17.40    2.60
  -1  -7 -21    3.40    1.50
   1  -7  21    4.50    1.80
  -1  -7 -22    5.70    1.70
   1  -7  22    5.80    1.80
   1  -7  23    9.10    2.30
  -1  -7 -23    9.40    2.00
  -1  -7 -24    2.60    1.50
   1  -7  24   -1.30    1.70
   1  -8 -19    6.80    1.50
  -1  -8  19    3.80    2.00
  -1  -8  18    4.70    1.80
   1  -8 -18    1.10    1.10
   1  -8 -17    1.40    1.10
  -1  -8  17   -2.40    1.30
   1  -8 -16    2.90    1.10
  -1  -8  16    2.20    1.60
  -1  -8  15    4.90    1.60
   1  -8 -15    3.70    1.00
   1  -8 -14    1.90    0.90
  -1  -8  14    0.80    1.30
   1  -8 -13    5.20    1.00
  -1  -8  13    7.80    1.80
   1  -8 -12    2.80    0.80
  -1  -8  12    4.40    1.60
  -1  -8  11    2.20    1.30
  -1  -8  10    2.60    1.30
  -1  -8   9   12.10    1.90
  -1  -8   8    6.10    1.50
  -1  -8   7    9.70    1.60
  -1  -8   6   17.40    2.00
  -1  -8   5   19.60    2.00
  -1  -8   4    7.10    1.40
  -1  -8   3   11.50    1.50
  -1  -8   2   15.60    1.60
  -1  -8   1   54.99    2.70
   1  -8   0   20.40    1.60
  -1  -8   0   21.70    1.70
   1  -8   1   54.59    2.50
  -1  -8  -1   55.89    2.50
  -1  -8  -2   15.40    1.30
   1  -8   2   14.80    1.50
   1  -8   3   10.00    1.40
   1  -8   4    7.60    1.40
   1  -8   5   25.30    2.20
   1  -8   6   18.50    1.90
   1  -8   7   10.10    1.60
   1  -8   8    3.00    1.30
   1  -8   9   17.20    2.00
  -1  -8 -10    3.90    0.80
   1  -8  10    3.70    1.40
   1  -8  11    5.20    1.50
  -1  -8 -11    3.80    0.80
  -1  -8 -12    3.00    0.90
   1  -8  12    1.50    1.40
  -1  -8 -13    3.90    1.00
   1  -8  13    4.00    1.60
  -1  -8 -14    1.20    0.90
   1  -8  14    3.20    1.40
  -1  -8 -15    4.60    1.10
   1  -8  15    2.80    1.50
  -1  -8 -16    2.60    1.10
   1  -8  16   -0.10    1.50
  -1  -8 -17    0.20    1.00
   1  -8  17   -1.60    1.30
   1  -8  18    4.10    1.80
  -1  -8 -18    2.60    1.30
  -1  -8 -19    7.00    1.50
   1  -8  19    5.40    2.00
  -1  -9  11   10.50    2.00
  -1  -9  10   18.70    2.30
  -1  -9   9   17.20    2.30
  -1  -9   8    6.90    1.70
  -1  -9   7    1.40    1.30
  -1  -9   6    0.50    1.20
  -1  -9   5    1.90    1.20
  -1  -9   4    7.40    1.50
  -1  -9   3    1.30    1.00
  -1  -9   2    3.30    1.10
  -1  -9   1   11.90    1.40
  -1  -9   0    1.00    0.90
  -1  -9  -1    8.20    1.10
   1  -9   1   11.20    1.30
   1  -9   2    3.40    1.00
   1  -9   3    0.30    0.90
   1  -9   4    6.10    1.30
   1  -9   5    3.80    1.20
   1  -9   6   -0.90    1.00
   1  -9   7    2.00    1.30
   1  -9   8    6.80    1.60
   1  -9   9   17.70    2.20
   1  -9  10   15.70    2.20
   1  -9  11    7.80    1.80
  -2   0  36   40.40    3.50
  -2   0  35   15.80    2.40
  -2   0  34   28.20    3.00
  -2   0  33   17.50    2.40
  -2   0  32   40.90    3.20
  -2   0  31   66.69    4.10
  -2   0  30   45.00    3.20
  -2   0  29   51.69    3.40
  -2   0  28   34.50    2.80
  -2   0  27  487.05   16.30
   2   0 -26   58.89    7.80
  -2   0  26   57.89    3.60
  -2   0  25  537.75   18.30
   2   0 -25  581.14   32.80
   2   0 -25  573.64   18.00
  -2   0  24   58.89    3.50
   2   0 -24   64.29    7.50
   2   0 -24   56.49    3.70
   2   0 -23  888.31   26.50
  -2   0  23  841.02   26.70
   2   0 -23  848.32   46.50
  -2   0  23  852.71   26.50
   2   0 -22  138.39   11.10
   2   0 -22  134.69    5.90
   2   0 -22  152.48    5.80
  -2   0  22  130.59    6.10
  -2   0  22  129.39    5.50
  -2   0  22  139.19    6.30
   2   0 -21  278.77   17.80
  -2   0  21  263.17   10.30
  -2   0  21  273.47    9.50
  -2   0  21  265.17    9.90
   2   0 -21  275.07    9.40
   2   0 -20   47.80    2.80
  -2   0  20   43.90    3.00
  -2   0  20   47.60    3.10
   2   0 -20   36.50    2.70
   2   0 -20   45.70    5.70
  -2   0  20   49.30    2.80
   2   0 -19   87.09    4.10
  -2   0  19   85.09    4.30
   2   0 -19   86.29    3.90
   2   0 -19   84.59    7.90
  -2   0  19   81.29    4.30
  -2   0  19   86.59    3.80
   2   0 -18   81.09    3.90
   2   0 -18   77.89    7.40
  -2   0  18   80.49    3.70
  -2   0  18   83.19    4.20
   2   0 -18   87.59    4.50
   2   0 -18   81.59    3.70
  -2   0  18   80.09    4.10
  -2   0  18   76.89    4.00
  -2   0  17  278.57    9.60
  -2   0  17  272.87   10.10
   2   0 -17  310.97   11.40
   2   0 -17  268.57    9.10
  -2   0  17  271.97    9.30
  -2   0  17  270.47    9.60
   2   0 -17  262.47   17.20
   2   0 -17  281.17    9.40
   2   0 -17  275.37    9.60
  -2   0  17  276.57   10.90
  -2   0  16   45.30    2.90
  -2   0  16   41.50    2.70
   2   0 -16   44.90    2.80
   2   0 -16   49.60    2.80
   2   0 -16   48.10    2.90
   2   0 -16   42.30    5.20
  -2   0  16   46.80    2.90
   2   0 -16   56.59    3.10
   2   0 -16   52.49    2.60
  -2   0  16   48.40    2.50
  -2   0  16   45.80    2.70
   2   0 -15  148.99    6.00
   2   0 -15  165.28    6.10
  -2   0  15  157.48    6.30
   2   0 -15  168.68    6.80
  -2   0  15  150.78    6.00
   2   0 -15  169.68    6.50
  -2   0  15  155.88    6.00
   2   0 -15  164.18    5.90
  -2   0  15  155.08    6.60
  -2   0  15  160.58    5.80
   2   0 -15  148.69   11.00
  -2   0  14  746.03   22.80
   2   0 -14  782.52   22.90
  -2   0  14  768.32   23.40
   2   0 -14  803.02   24.60
   2   0 -14  669.33   40.10
   2   0 -14  771.42   22.80
   2   0 -14  842.82   27.80
  -2   0  14  768.22   22.80
  -2   0  14  740.83   24.50
   2   0 -14  797.82   23.60
  -2   0  14  775.72   27.60
   2   0 -13   81.69    3.60
   2   0 -13   88.79    3.80
   2   0 -13   79.29    3.40
  -2   0  13   64.69    3.40
   2   0 -13   77.29    3.70
   2   0 -13   62.09    6.20
  -2   0  13   73.09    3.50
  -2   0  13   75.39    3.50
  -2   0  13   68.89    3.10
  -2   0  13   70.19    3.40
   2   0 -13   70.89    3.40
   2   0 -12  542.25   33.10
   2   0 -12  656.83   18.90
  -2   0  12  649.34   19.30
   2   0 -12  688.83   22.80
  -2   0  12  646.14   18.80
   2   0 -12  638.34   20.30
   2   0 -12  649.83   19.50
  -2   0  12  616.84   20.20
  -2   0  12  620.44   18.80
   2   0 -12  621.44   18.70
  -2   0  12  620.04   22.70
  -2   0  11   90.59    3.80
   2   0 -11   93.79    3.80
  -2   0  11   90.99    4.00
   2   0 -11   91.49    3.80
   2   0 -11  100.29    4.10
  -2   0  11   95.89    3.80
   2   0 -11   88.49    3.90
  -2   0  11   87.59    3.90
   2   0 -11   82.19    6.70
  -2   0  11   93.99    3.50
   2   0 -11   97.89    3.70
  -2   0  10   22.40    1.60
  -2   0  10   25.20    3.00
   2   0 -10   23.30    1.60
   2   0 -10   24.20    1.70
  -2   0  10   26.60    1.70
   2   0 -10   24.20    1.70
   2   0 -10   20.40    3.00
  -2   0  10   23.60    1.60
  -2   0  10   23.10    1.50
   2   0 -10   26.30    1.50
  -2   0   9  423.36   13.00
  -2   0   9  420.26   14.10
  -2   0   9  434.96   15.70
  -2   0   9  418.66   13.10
   2   0  -9  441.86   13.10
   2   0  -9  469.15   15.70
  -2   0   9  437.86   23.00
   2   0  -9  435.96   13.00
   2   0  -9  440.86   14.10
  -2   0   8  310.07   10.50
   2   0  -8  319.07    9.80
  -2   0   8  310.17   11.60
   2   0  -8  323.57    9.80
   2   0  -8  318.17   10.50
  -2   0   8  322.47    9.80
  -2   0   8  312.37    9.70
   2   0  -8  335.77   11.60
  -2   0   8  322.67   17.10
   2   0  -7  276.07    8.90
  -2   0   7  269.27    8.20
  -2   0   7  260.07    8.10
  -2   0   7  268.57    9.70
   2   0  -7  279.67    9.70
  -2   0   7  278.77   14.40
   2   0  -7  223.68   14.30
  -2   0   7  265.27    8.80
   2   0  -7  271.77    8.20
   2   0  -7  260.97    8.10
  -2   0   6   11.00    0.90
   2   0  -6   11.20    0.90
   2   0  -6   10.30    0.90
  -2   0   6   14.60    1.00
   2   0  -6   10.40    0.70
  -2   0   6   11.70    0.90
   2   0  -6   13.80    1.00
  -2   0   6    9.50    1.50
   2   0  -6   11.40    1.80
  -2   0   6   12.40    0.80
   2   0  -5   22.90    2.30
  -2   0   5   25.30    1.30
  -2   0   5   23.70    1.40
   2   0  -5   24.90    1.30
   2   0  -5   26.90    1.40
  -2   0   5   26.70    2.20
  -2   0   5   24.20    1.30
  -2   0   5   24.00    1.30
   2   0  -5   24.80    1.20
   2   0  -5   24.70    1.30
   2   0  -4  837.72   22.80
  -2   0   4  904.91   40.00
  -2   0   4  810.02   22.80
  -2   0   4  837.32   22.90
  -2   0   4  823.82   24.90
   2   0  -4  796.92   24.80
   2   0  -4  800.02   22.80
  -2   0   4  816.12   28.40
   2   0  -4  781.02   40.00
   2   0  -4  757.12   28.40
  -2   0   3 3427.36   96.59
  -2   0   3 3590.74   96.59
  -2   0   3 3939.01  170.48
   2   0  -3 3483.95   96.59
   2   0  -3 3309.27  105.09
   2   0  -3 3411.26   96.59
   2   0  -2  256.17    7.40
   2   0   0   -2.60    0.10
  -2   0   0   -2.60    0.10
   2   0   2  305.37   14.90
   2   0   2  276.17    8.40
  -2   0  -2  285.77    8.40
   2   0   2  311.07   10.80
   2   0   2  299.57    9.00
   2   0   3 3374.56   93.49
   2   0   3 3520.25  101.99
   2   0   3 3172.58  118.49
   2   0   3 3455.45   93.49
  -2   0  -3 3495.35   93.49
  -2   0  -3 3363.86   93.49
  -2   0  -3 3498.75  101.79
  -2   0  -4  785.72   22.40
  -2   0  -4  836.42   24.20
   2   0   4  785.82   22.40
   2   0   4  812.42   24.20
  -2   0  -4  778.52   28.40
   2   0   4  828.22   22.40
  -2   0  -4  811.02   22.40
   2   0   4  840.82   28.30
  -2   0  -4  740.53   39.60
   2   0   5   25.50    1.30
   2   0   5   23.90    1.20
   2   0   5   27.80    1.60
   2   0   5   20.90    1.20
  -2   0  -5   26.20    1.20
  -2   0  -5   25.40    2.50
  -2   0  -5   23.70    1.30
  -2   0  -5   23.10    1.20
   2   0   5   20.50    2.40
  -2   0  -5   24.20    1.60
  -2   0  -6   12.90    0.90
   2   0   6   12.60    1.00
  -2   0  -6   11.20    0.80
   2   0   6   10.60    0.80
   2   0   6   11.70    0.90
  -2   0  -6   11.20    1.10
   2   0   6    7.60    1.70
  -2   0  -6   11.10    0.90
   2   0   6   12.40    0.90
  -2   0  -6    9.30    1.80
  -2   0  -7  269.17    8.20
  -2   0  -7  266.77   10.30
   2   0   7  266.37    8.20
   2   0   7  273.77    8.20
  -2   0  -7  236.18   14.60
  -2   0  -7  270.67    8.60
   2   0   7  267.37    8.60
  -2   0  -7  267.67    8.10
   2   0   7  279.07   10.10
  -2   0  -8  315.77   10.00
   2   0   8  322.77   11.60
   2   0   8  305.07    9.40
  -2   0  -8  315.17   12.00
  -2   0  -8  305.97    9.50
   2   0   8  311.97   10.00
  -2   0  -8  317.47    9.50
   2   0   8  318.97    9.50
  -2   0  -8  283.07   17.00
  -2   0  -9  445.16   13.70
   2   0   9  446.06   15.80
  -2   0  -9  428.76   12.80
   2   0   9  418.16   12.80
   2   0   9  427.36   12.80
   2   0   9  417.26   13.60
  -2   0  -9  432.86   16.20
  -2   0  -9  407.06   23.00
  -2   0  -9  435.76   12.80
  -2   0 -10   27.30    2.00
   2   0  10   23.50    1.50
   2   0  10   21.50    1.50
  -2   0 -10   23.60    1.50
  -2   0 -10   24.50    1.50
  -2   0 -10   21.30    1.50
   2   0  10   21.10    1.50
  -2   0 -10   23.80    3.10
   2   0  10   24.70    1.70
  -2   0 -10   23.90    1.50
  -2   0 -11   88.09    3.60
  -2   0 -11   87.89    3.50
  -2   0 -11   86.09    6.90
  -2   0 -11   92.59    4.60
   2   0  11   88.49    3.40
  -2   0 -11   91.89    3.70
   2   0  11   91.79    3.70
   2   0  11   87.29    3.70
   2   0  11   87.89    3.60
  -2   0 -11   94.39    3.70
   2   0  11   89.99    4.10
  -2   0 -12  635.34   18.50
  -2   0 -12  638.94   18.50
   2   0  12  622.74   22.60
  -2   0 -12  629.64   19.70
   2   0  12  616.54   18.40
   2   0  12  609.14   18.90
  -2   0 -12  610.64   23.10
  -2   0 -12  632.34   19.10
  -2   0 -12  598.24   33.00
   2   0  12  608.44   18.40
   2   0  12  617.74   19.60
   2   0  13   84.39    3.20
  -2   0 -13   73.09    6.70
  -2   0 -13   73.79    3.40
  -2   0 -13   77.39    4.40
   2   0  13   71.79    3.40
   2   0  13   71.59    3.40
   2   0  13   69.89    3.40
  -2   0 -13   73.19    3.40
   2   0  13   70.89    3.70
  -2   0 -13   77.49    3.50
  -2   0 -13   87.09    3.50
  -2   0 -14  770.32   22.50
   2   0  14  757.02   24.00
  -2   0 -14  774.62   28.40
  -2   0 -14  751.42   23.30
   2   0  14  772.72   22.50
  -2   0 -14  764.12   22.50
  -2   0 -14  787.12   24.10
  -2   0 -14  745.73   40.20
   2   0  14  765.82   23.20
   2   0  14  738.13   27.50
   2   0  14  745.43   22.50
  -2   0 -15  156.68    5.70
  -2   0 -15  155.88    5.90
  -2   0 -15  150.98    7.30
  -2   0 -15  143.09   10.70
   2   0  15  152.08    6.00
  -2   0 -15  154.28    5.90
   2   0  15  153.88    6.60
   2   0  15  151.68    5.60
  -2   0 -15  154.88    6.00
   2   0  15  155.58    5.90
   2   0  15  152.88    5.90
  -2   0 -16   42.70    2.70
  -2   0 -16   48.60    3.50
   2   0  16   49.60    2.50
   2   0  16   44.90    2.80
   2   0  16   46.70    2.80
  -2   0 -16   44.50    2.60
   2   0  16   43.10    2.80
  -2   0 -16   45.70    2.80
  -2   0 -16   50.79    2.70
  -2   0 -16   46.60    2.70
   2   0  16   44.20    2.60
  -2   0 -16   48.60    5.40
   2   0  17  276.67    9.20
  -2   0 -17  280.77    9.90
  -2   0 -17  287.97    9.40
   2   0  17  251.67    9.40
   2   0  17  263.77    9.70
   2   0  17  267.57   10.90
  -2   0 -17  261.57   17.10
   2   0  17  275.17    9.50
  -2   0 -17  274.87    9.00
  -2   0 -17  276.07    9.50
  -2   0 -17  285.57   11.90
  -2   0 -18   83.59    7.60
   2   0  18   75.79    4.20
  -2   0 -18   83.79    5.10
  -2   0 -18   77.69    3.80
  -2   0 -18   80.19    4.00
   2   0  18   86.59    4.10
   2   0  18   79.49    3.60
  -2   0 -18   82.89    3.80
   2   0  18   77.09    3.90
  -2   0 -19   88.29    4.10
  -2   0 -19   88.49    5.50
  -2   0 -19   86.39    4.10
   2   0  19   86.69    4.40
   2   0  19   92.69    4.70
   2   0  19   88.89    4.30
   2   0  19   84.19    3.90
  -2   0 -19   85.69    8.00
  -2   0 -20   50.19    2.90
  -2   0 -20   47.70    3.00
   2   0  20   49.70    2.80
  -2   0 -20   52.79    6.20
   2   0  20   46.30    3.20
  -2   0 -20   51.09    4.10
   2   0  20   48.90    3.30
   2   0  20   45.20    3.00
   2   0  21  267.17    9.70
  -2   0 -21  270.37    9.50
   2   0  21  280.17   10.40
  -2   0 -21  308.67   18.60
  -2   0 -21  285.97    9.70
   2   0  21  263.97   10.10
   2   0  22  144.69    5.90
  -2   0 -22  160.38    6.10
  -2   0 -22  144.79   11.70
   2   0  22  139.79    6.40
   2   0  22  137.99    6.40
  -2   0 -23  879.21   27.20
  -2   0 -23  921.41   48.00
   2   0  23  863.51   28.50
   2   0  23  860.91   27.40
  -2   0 -24   60.39    7.50
  -2   0 -24   67.69    3.90
   2   0  24   65.89    3.70
  -2   0 -25  572.54   18.60
   2   0  25  542.45   18.70
  -2   0 -25  638.14   34.20
   2   0  26   54.99    3.50
  -2   0 -26   65.69    4.00
   2   0  27  494.15   16.50
   2   0  28   40.10    3.00
   2   0  29   47.60    3.30
   2   0  30   49.99    3.50
   2   0  31   65.29    4.00
   2   0  32   37.20    3.10
   2   0  33   13.90    2.20
   2   0  34   25.60    2.90
   2   0  35    8.40    1.90
   2   0  36   38.00    3.30
  -2   1  36   11.10    2.30
  -2  -1  36    9.30    2.00
  -2   1  35   41.30    3.50
  -2  -1  35   49.20    3.60
  -2   1  34    2.10    1.50
  -2  -1  34    4.30    1.60
  -2   1  33   43.80    3.40
  -2  -1  33   37.60    3.10
  -2   1  32    6.60    1.70
  -2  -1  32   12.70    2.00
  -2   1  31   36.00    3.00
   2   1 -31   42.00    3.80
  -2  -1  31   38.60    3.10
   2   1 -30   17.40    3.00
  -2   1  30   15.10    2.10
  -2  -1  30   18.10    2.20
  -2   1  29  226.68    9.00
   2   1 -29  238.58    9.30
  -2  -1  29  234.78    8.90
   2   1 -28   24.30    3.00
  -2   1  28   23.80    2.50
  -2  -1  28   33.80    2.80
  -2   1  27   85.99    4.40
   2   1 -27   88.19    5.00
   2  -1 -27   89.39    8.80
  -2  -1  27   90.99    4.50
   2  -1 -27   89.59    5.00
  -2   1  26   82.99    4.40
   2   1 -26   81.19    4.80
  -2  -1  26   90.39    4.40
   2  -1 -26   99.39    8.90
   2  -1 -26   91.89    4.90
   2   1 -25   19.40    2.70
  -2   1  25   20.50    2.20
   2   1 -25   24.20    5.70
  -2  -1  25   29.30    2.40
   2  -1 -25   24.10    5.00
   2  -1 -25   32.90    2.80
   2   1 -24  141.39   12.80
  -2   1  24  165.28    6.60
   2   1 -24  157.88    6.80
   2  -1 -24  184.38   12.60
   2  -1 -24  165.58    6.80
  -2  -1  24  164.08    6.50
   2   1 -23   45.10    3.50
  -2   1  23   52.89    3.10
  -2   1  23   51.49    3.50
   2   1 -23   44.10    6.60
  -2   1  23   54.29    3.60
  -2  -1  23   51.49    3.10
   2  -1 -23   62.29    6.70
   2  -1 -23   58.19    3.60
   2   1 -22  130.39    5.80
  -2   1  22  124.29    5.90
  -2   1  22  135.69    6.10
  -2   1  22  118.89    5.30
   2  -1 -22  133.19    5.70
  -2  -1  22  134.39    5.50
   2  -1 -22  135.79   10.20
   2   1 -21  532.45   17.90
  -2   1  21  549.05   18.40
  -2   1  21  537.45   17.40
  -2   1  21  548.65   17.50
   2  -1 -21  584.24   30.40
  -2  -1  21  538.85   17.40
   2  -1 -21  522.25   16.60
  -2   1  20  237.88    8.50
   2   1 -20  193.28   15.80
   2   1 -20  244.68    9.00
  -2   1  20  252.87    9.10
  -2   1  20  225.98    9.10
  -2  -1  20  257.27    8.60
  -2  -1  20  240.88    9.60
   2  -1 -20  245.28    8.50
   2  -1 -20  273.27   15.60
   2   1 -19  129.19    5.60
  -2   1  19  114.69    5.40
   2   1 -19  121.19    5.50
  -2   1  19  112.59    5.30
   2   1 -19  132.59    6.00
  -2   1  19  114.79    4.80
  -2  -1  19  123.59    5.00
  -2  -1  19  119.69    5.70
   2  -1 -19  124.19    9.20
  -2  -1  19  126.49    5.70
   2  -1 -19  125.59    5.20
  -2  -1  19  133.79    6.20
   2   1 -18  364.06   12.10
   2   1 -18  369.06   14.10
   2   1 -18  372.56   12.30
  -2   1  18  357.16   12.00
  -2   1  18  345.87   11.70
   2   1 -18  367.66   12.40
  -2   1  18  353.96   12.50
  -2  -1  18  363.46   12.10
  -2  -1  18  339.17   12.80
  -2  -1  18  349.07   11.80
  -2  -1  18  372.36   14.40
   2  -1 -18  371.36   20.70
   2  -1 -18  357.56   11.40
  -2  -1  18  360.96   12.20
   2   1 -17  145.39    6.60
  -2   1  17  141.69    5.90
   2   1 -17  146.29    6.00
  -2   1  17  154.48    6.00
   2   1 -17  149.29    6.10
  -2   1  17  142.49    6.00
   2   1 -17  147.99    6.00
  -2   1  17  145.79    5.50
  -2  -1  17  133.59    5.90
   2  -1 -17  147.59    5.60
  -2  -1  17  150.48    6.80
  -2  -1  17  146.69    5.50
  -2  -1  17  147.99    6.00
  -2  -1  17  147.59    6.40
  -2   1  16  174.98    6.80
   2   1 -16  176.78    6.70
  -2   1  16  183.58    6.80
  -2   1  16  165.98    6.10
   2   1 -16  177.98    6.80
   2   1 -16  170.58    6.80
  -2   1  16  179.28    6.60
   2   1 -16  171.98    7.40
  -2  -1  16  163.38    6.60
   2  -1 -16  177.88   11.20
   2  -1 -16  159.98    6.70
   2  -1 -16  158.78    6.90
  -2  -1  16  171.88    6.20
  -2  -1  16  181.18    7.70
   2  -1 -16  173.38    6.50
  -2  -1  16  172.48    7.00
   2  -1 -16  167.88    6.20
  -2  -1  16  179.88    6.70
  -2   1  15  966.40   27.50
  -2   1  15  921.41   27.40
  -2   1  15  931.91   28.20
  -2   1  15  933.11   29.50
   2   1 -15  988.60   27.80
   2   1 -15  919.31   27.60
   2   1 -15  961.40   33.80
  -2   1  15  974.40   33.10
   2   1 -15  972.80   29.10
   2  -1 -15  953.60   27.40
  -2  -1  15  871.01   27.50
  -2  -1  15  913.71   28.30
   2  -1 -15  932.31   29.50
  -2  -1  15  955.70   27.60
   2  -1 -15  888.61   33.20
   2  -1 -15  941.31   26.40
  -2  -1  15  905.61   29.80
  -2  -1  15  948.01   34.00
  -2   1  14   29.10    1.80
  -2   1  14   33.70    2.20
   2   1 -14   30.40    2.30
   2   1 -14   31.40    2.30
   2   1 -14   32.60    2.20
  -2   1  14   32.80    2.20
  -2   1  14   33.40    1.80
   2   1 -14   34.50    2.30
   2   1 -14   27.10    4.00
  -2   1  14   26.10    2.00
   2  -1 -14   27.80    1.80
   2  -1 -14   33.40    3.60
  -2  -1  14   31.70    2.30
  -2  -1  14   32.50    2.30
  -2  -1  14   31.20    2.40
  -2  -1  14   31.90    2.30
   2  -1 -14   27.50    2.10
   2  -1 -14   30.50    2.10
   2  -1 -14   29.90    2.10
   2   1 -13 1954.10  110.39
  -2   1  13 2291.17   62.59
  -2   1  13 2192.48   62.59
   2   1 -13 2320.07   68.29
   2   1 -13 2246.98   78.39
  -2   1  13 2289.47   77.69
   2   1 -13 2284.97   62.89
   2   1 -13 2315.47   66.59
  -2   1  13 2174.68   67.79
   2   1 -13 2187.18   62.79
   2  -1 -13 2313.27   62.69
  -2  -1  13 2311.67   62.79
  -2  -1  13 2247.78   62.89
  -2  -1  13 2224.08   78.59
  -2  -1  13 2245.58   65.89
  -2  -1  13 2147.19   68.09
   2  -1 -13 2194.98   77.69
   2  -1 -13 2283.37  109.69
   2  -1 -13 2279.47   62.59
   2  -1 -13 2243.58   60.39
   2  -1 -13 2208.38   67.79
   2   1 -12  135.79    9.50
   2   1 -12  139.79    5.30
  -2   1  12  132.39    5.10
   2   1 -12  137.29    5.50
  -2   1  12  137.09    5.10
  -2   1  12  133.39    5.30
   2   1 -12  138.39    5.40
  -2   1  12  145.59    5.40
   2   1 -12  135.49    6.00
   2   1 -12  148.19    5.70
   2  -1 -12  153.48    5.30
  -2  -1  12  136.19    5.70
  -2  -1  12  137.69    5.30
   2  -1 -12  138.99    5.20
  -2  -1  12  137.19    6.20
   2  -1 -12  131.09    4.90
  -2  -1  12  139.19    5.30
  -2  -1  12  147.09    5.00
   2  -1 -12  143.19    5.50
   2  -1 -12  134.49    5.40
   2  -1 -12  149.09    8.80
   2   1 -11 3221.98  163.88
   2   1 -11 3470.55   98.99
  -2   1  11 3251.17  100.99
  -2   1  11 3429.46   92.99
  -2   1  11 3323.77   92.99
   2   1 -11 3305.17  116.89
   2   1 -11 3433.46   93.29
   2   1 -11 3353.76   93.19
  -2   1  11 3408.56  116.19
   2   1 -11 3466.85  101.39
  -2  -1  11 3348.47  117.09
   2  -1 -11 3445.46  163.18
  -2  -1  11 3444.76   93.19
  -2  -1  11 3391.56   93.29
   2  -1 -11 3298.67  100.99
  -2  -1  11 3306.07   98.39
   2  -1 -11 3488.85   93.09
   2  -1 -11 3445.86  116.29
   2  -1 -11 3127.69   92.89
  -2  -1  11 3256.87  101.29
   2   1 -10   81.79    3.90
   2   1 -10   81.69    3.50
  -2   1  10   81.19    3.30
   2   1 -10   86.09    3.70
   2   1 -10   85.49    3.60
   2   1 -10   87.69    6.20
   2   1 -10   80.79    3.50
  -2   1  10   78.19    3.40
  -2   1  10   83.59    3.30
  -2   1  10   85.29    3.30
  -2   1  10   70.49    5.60
   2  -1 -10   88.99    3.30
  -2  -1  10   83.29    3.10
  -2  -1  10   78.79    4.00
   2  -1 -10   93.39    5.60
  -2  -1  10   79.59    3.40
  -2  -1  10   82.99    3.50
  -2  -1  10   79.29    3.70
   2  -1 -10   84.19    3.40
   2  -1 -10   84.69    3.50
  -2   1   9 1099.19   35.50
   2   1  -9 1210.58   35.90
  -2   1   9 1131.59   32.80
  -2   1   9 1015.50   57.39
   2   1  -9 1223.88   57.99
  -2   1   9 1163.78   40.50
   2   1  -9 1123.69   41.10
   2   1  -9 1159.78   33.00
   2   1  -9 1174.58   33.00
  -2   1   9 1162.68   32.80
   2  -1  -9 1170.48   35.50
   2  -1  -9 1213.38   32.80
  -2  -1   9 1163.08   41.30
  -2  -1   9 1175.08   33.00
  -2  -1   9 1158.38   33.00
   2  -1  -9 1242.58   57.29
  -2  -1   9 1125.19   35.80
   2  -1  -9 1213.38   40.40
   2   1  -8  355.46   10.80
   2   1  -8  364.96   10.80
  -2   1   8  334.17   18.40
  -2   1   8  333.47   10.50
  -2   1   8  351.06   11.40
  -2   1   8  340.17   12.60
  -2   1   8  347.37   10.60
   2   1  -8  358.86   11.70
   2   1  -8  341.97   13.20
   2   1  -8  386.96   18.90
  -2  -1   8  352.76   10.80
  -2  -1   8  356.76   13.30
  -2  -1   8  337.77   11.70
  -2  -1   8  386.36   18.80
   2  -1  -8  352.86   11.40
  -2  -1   8  346.17   10.80
   2  -1  -8  371.26   18.30
   2  -1  -8  360.96   10.60
   2   1  -7  656.23   18.80
  -2   1   7  592.14   22.80
  -2   1   7  671.43   32.50
   2   1  -7  630.14   18.80
  -2   1   7  650.33   18.60
  -2   1   7  632.24   18.60
   2   1  -7  706.53   32.90
   2   1  -7  674.53   20.50
  -2   1   7  631.94   20.10
   2   1  -7  635.74   23.40
  -2  -1   7  628.94   23.50
  -2  -1   7  652.43   20.50
   2  -1  -7  655.93   18.60
  -2  -1   7  706.13   33.00
  -2  -1   7  629.94   18.80
   2  -1  -7  684.03   32.40
   2  -1  -7  658.93   20.20
  -2  -1   7  656.53   18.90
   2   1  -6 1721.53   50.69
  -2   1   6 1696.53   57.89
   2   1  -6 1671.33   46.60
  -2   1   6 1803.32   81.29
  -2   1   6 1689.73   46.40
  -2   1   6 1595.34   46.30
   2   1  -6 1751.02   81.69
   2   1  -6 1629.44   58.59
  -2   1   6 1617.04   50.39
   2   1  -6 1589.14   46.60
   2  -1  -6 1690.73   81.19
  -2  -1   6 1667.53   46.60
  -2  -1   6 1689.83   58.69
  -2  -1   6 1671.53   50.69
   2  -1  -6 1637.84   50.39
  -2  -1   6 1774.92   81.79
   2  -1  -6 1668.23   46.40
   2  -1  -6 1632.94   46.70
  -2  -1   6 1623.04   46.60
  -2   1   5  272.37   12.90
   2   1  -5  260.27    8.40
   2   1  -5  244.28    7.70
  -2   1   5  253.27    8.20
  -2   1   5  249.68    9.00
   2   1  -5  259.37   13.30
  -2   1   5  248.48    7.50
  -2   1   5  256.17    7.50
   2   1  -5  259.17    7.70
   2   1  -5  248.38    9.60
  -2  -1   5  256.67    9.70
   2  -1  -5  248.18    7.60
  -2  -1   5  254.37    7.70
  -2  -1   5  261.07   13.40
   2  -1  -5  251.17    7.50
   2  -1  -5  224.08    7.40
  -2  -1   5  247.68    8.40
   2  -1  -5  258.07   12.90
   2  -1  -5  259.67    8.20
  -2  -1   5  249.58    7.70
   2   1  -4 1424.66   38.20
  -2   1   4 1376.86   38.00
   2   1  -4 1351.36   48.20
   2   1  -4 1348.86   38.20
   2   1  -4 1399.06   41.60
  -2   1   4 1361.16   47.70
  -2   1   4 1389.36   38.00
  -2   1   4 1436.96   66.59
  -2   1   4 1382.86   41.40
   2   1  -4 1384.66   67.09
   2  -1  -4 1349.27   38.30
  -2  -1   4 1418.56   67.19
   2  -1  -4 1369.16   41.40
  -2  -1   4 1372.06   41.60
   2  -1  -4 1388.56   38.00
  -2  -1   4 1268.37   38.20
  -2  -1   4 1416.36   48.30
   2  -1  -4 1357.26   38.00
  -2  -1   4 1318.27   38.20
  -2   1   3  227.28    7.30
   2   1  -3  229.98    6.80
  -2   1   3  223.18    8.20
   2   1  -3  225.68    7.40
   2   1  -3  219.58    6.70
  -2   1   3  226.58   11.40
   2   1  -3  232.58   11.90
   2   1  -3  228.98    8.60
  -2   1   3  227.68    6.60
  -2   1   3  232.28    6.50
   2  -1  -3  229.98    6.60
  -2  -1   3  232.98    8.60
   2  -1  -3  227.18    6.80
   2  -1  -3  227.28    7.30
   2  -1  -3  233.08    8.20
  -2  -1   3  229.58   11.90
   2  -1  -3  229.88    6.50
  -2  -1   3  220.48    6.70
  -2  -1   3  228.98    7.40
  -2  -1   3  223.48    6.90
  -2   1   2   80.69    2.40
  -2   1   2   81.99    2.40
   2   1  -2   79.09    3.50
  -2   1   2   80.59    2.40
   2   1  -2   84.09    4.80
   2   1  -2   81.09    2.90
   2   1  -2   82.29    2.60
  -2   1   2   80.59    2.90
   2   1  -2   78.59    2.60
  -2   1   2   77.49    3.20
   2   1  -2   80.29    2.70
  -2  -1   2   78.89    2.70
  -2  -1   2   81.99    3.50
  -2  -1   2   79.89    2.90
  -2  -1   2   82.79    4.80
   2  -1  -2   83.09    3.20
   2  -1  -2   82.49    2.90
  -2  -1   2   79.79    2.60
   2  -1  -2   79.39    2.40
   2  -1  -2   79.69    2.40
  -2   1   1   38.50    2.20
   2   1  -1   32.30    1.30
  -2   1   1   34.00    1.10
   2   1  -1   32.40    1.30
  -2   1   1   33.30    1.40
   2   1  -1   34.30    1.20
   2   1  -1   34.50    1.40
  -2   1   1   32.90    1.60
   2   1  -1   34.30    1.80
  -2   1   1   33.10    1.10
   2   1  -1   33.10    2.40
   2   1  -1   32.60    1.30
   2  -1  -1   33.90    1.60
   2  -1  -1   30.80    1.10
  -2  -1   1   32.90    1.20
   2  -1  -1   31.50    1.10
  -2  -1   1   29.50    1.40
  -2  -1   1   33.90    1.30
  -2   1   0 1184.78   30.70
   2   1   0 1162.98   30.80
   2   1   0 1152.08   30.90
   2   1   0 1158.48   33.60
  -2   1   0 1081.79   39.10
  -2   1   0 1161.48   31.90
   2   1   0 1097.89   32.00
  -2   1   0 1172.18   33.80
  -2   1   0 1153.48   30.70
  -2   1   0 1180.98   54.29
  -2  -1   0 1102.89   30.80
  -2  -1   0  978.60   33.50
  -2  -1   0 1193.68   32.00
   2  -1   0 1178.88   54.29
   2  -1   0 1125.99   39.10
   2  -1   0 1115.99   33.70
   2  -1   0 1079.69   30.70
  -2  -1   0  949.80   30.80
   2  -1   0 1005.60   30.70
   2   1   1   33.00    1.20
  -2   1  -1   33.60    1.10
   2   1   1   32.70    1.20
  -2   1  -1   32.70    1.10
  -2   1  -1   34.10    2.20
   2   1   1   34.10    1.20
  -2   1  -1   33.20    1.50
  -2   1  -1   30.90    1.10
   2  -1   1   31.70    2.20
   2  -1   1   31.40    1.40
   2  -1   1   33.20    1.10
  -2  -1  -1   29.60    1.20
  -2  -1  -1   27.60    1.10
  -2  -1  -1   32.70    1.20
   2  -1   1   32.90    1.70
   2  -1   1   30.30    1.10
   2  -1   1   32.30    1.10
  -2   1  -2   81.29    2.90
   2   1   2   80.29    2.60
   2   1   2   81.89    2.50
  -2   1  -2   85.69    4.60
   2   1   2   81.79    2.50
  -2   1  -2   75.59    3.40
  -2   1  -2   81.99    2.50
  -2   1  -2   79.19    2.50
  -2  -1  -2   70.19    2.40
  -2  -1  -2   76.99    2.50
   2  -1   2   78.49    2.50
   2  -1   2   81.99    4.60
  -2  -1  -2   71.99    2.50
   2  -1   2   81.09    3.40
  -2   1  -3  223.58    6.70
   2   1   3  224.98    6.90
   2   1   3  225.18    6.60
   2   1   3  229.38   11.80
   2   1   3  228.68    7.00
   2   1   3  221.68    8.40
  -2   1  -3  219.08    6.70
  -2   1  -3  229.18    7.40
   2   1   3  231.58    6.60
  -2   1  -3  246.08   12.00
   2  -1   3  216.18    6.70
   2  -1   3  245.08   12.00
   2  -1   3  226.88    7.40
  -2  -1  -3  224.88    6.60
   2  -1   3  233.88    8.70
  -2   1  -4 1377.16   41.80
   2   1   4 1327.17   38.20
   2   1   4 1370.56   41.30
  -2   1  -4 1381.86   38.30
   2   1   4 1396.86   38.20
   2   1   4 1366.76   48.20
  -2   1  -4 1327.77   38.30
   2   1   4 1412.76   67.39
  -2   1  -4 1501.75   67.69
  -2   1  -4 1310.87   48.50
   2  -1   4 1313.47   38.30
  -2  -1  -4 1356.06   38.20
   2  -1   4 1390.06   41.80
  -2  -1  -4 1357.06   67.39
   2  -1   4 1402.46   48.60
   2  -1   4 1528.75   67.69
  -2  -1  -4 1383.76   41.30
  -2   1  -5  248.48    7.70
   2   1   5  254.67    9.40
   2   1   5  255.37    7.90
  -2   1  -5  243.98    9.70
   2   1   5  253.57    7.60
  -2   1  -5  252.37    7.70
  -2   1  -5  249.58    8.40
   2   1   5  250.37    7.60
  -2   1  -5  273.27   13.90
   2   1   5  264.37   13.40
  -2  -1  -5  254.57    7.90
   2  -1   5  247.58    8.40
   2  -1   5  293.27   13.80
   2  -1   5  260.37    9.80
  -2  -1  -5  252.87    7.60
  -2  -1  -5  257.07   13.40
   2  -1   5  251.07    7.70
  -2  -1  -5  253.97    9.40
   2  -1   5  239.58    7.70
   2   1   6 1662.53   45.60
  -2   1  -6 1601.84   57.69
  -2   1  -6 1653.83   80.89
   2   1   6 1599.14   45.60
  -2   1  -6 1690.73   49.80
  -2   1  -6 1679.23   45.80
   2   1   6 1635.24   49.30
   2   1   6 1647.24   57.49
  -2   1  -6 1596.24   45.70
   2  -1   6 1662.23   45.80
  -2  -1  -6 1628.54   45.60
   2  -1   6 1642.54   49.80
  -2  -1  -6 1663.23   80.19
  -2  -1  -6 1690.53   49.30
  -2  -1  -6 1675.63   57.39
   2  -1   6 1657.43   57.79
   2  -1   6 1609.14   45.70
   2   1   7  685.53   32.70
  -2   1  -7  655.63   20.30
   2   1   7  636.74   23.30
  -2   1  -7  653.13   23.50
   2   1   7  654.53   18.60
   2   1   7  637.44   19.80
  -2   1  -7  636.74   18.70
  -2   1  -7  644.64   18.70
   2   1   7  636.94   18.50
  -2   1  -7  646.34   33.40
   2  -1   7  642.74   20.30
  -2  -1  -7  659.13   23.20
  -2  -1  -7  643.44   18.50
  -2  -1  -7  658.03   32.60
   2  -1   7  666.93   23.60
   2  -1   7  641.34   18.70
   2  -1   7  639.34   18.70
  -2  -1  -7  670.13   19.80
  -2   1  -8  364.16   11.50
   2   1   8  319.47   13.10
   2   1   8  342.37   10.50
   2   1   8  345.17   11.00
  -2   1  -8  351.26   10.70
  -2   1  -8  356.66   13.30
  -2   1  -8  361.76   10.70
   2   1   8  344.37   10.50
  -2   1  -8  332.77   19.20
  -2  -1  -8  365.06   11.00
   2  -1   8  352.16   13.40
  -2  -1  -8  341.97   10.50
   2  -1   8  361.86   10.70
  -2  -1  -8  362.96   18.50
   2  -1   8  359.66   10.70
  -2  -1  -8  362.26   13.00
   2  -1   8  352.06   11.50
  -2   1  -9 1006.90   56.89
  -2   1  -9 1194.98   40.30
   2   1   9 1133.09   34.30
  -2   1  -9 1211.28   34.80
   2   1   9 1152.58   31.90
   2   1   9  966.20   40.00
  -2   1  -9 1180.98   32.10
   2   1   9 1136.69   31.90
  -2   1  -9 1146.09   32.10
  -2  -1  -9 1150.88   31.90
   2  -1   9 1135.09   32.10
   2  -1   9 1127.39   34.80
   2  -1   9 1178.38   32.10
   2  -1   9 1163.18   40.30
  -2  -1  -9 1160.28   34.30
  -2  -1  -9 1184.08   56.09
  -2  -1  -9 1167.88   39.90
  -2  -1  -9  962.60   31.70
  -2   1 -10   74.59    3.30
  -2   1 -10   73.19    6.50
  -2   1 -10   89.19    4.20
  -2   1 -10   87.79    3.50
  -2   1 -10   87.39    3.60
   2   1  10   71.89    3.90
   2   1  10   81.29    3.30
  -2   1 -10   85.59    3.60
   2   1  10   84.89    3.20
   2   1  10   83.39    3.30
   2  -1  10   85.49    3.50
  -2  -1 -10   86.29    5.80
   2  -1  10   79.69    3.40
  -2  -1 -10   83.09    3.20
   2  -1  10   83.89    3.10
   2  -1  10   83.09    3.60
   2  -1  10   86.49    4.20
  -2  -1 -10   88.79    3.90
  -2  -1 -10   81.49    3.30
  -2  -1 -10   85.29    3.30
   2   1  11 3371.66   93.09
  -2   1 -11 3511.05  101.29
  -2   1 -11 3435.76   99.19
   2   1  11 3071.39  117.09
  -2   1 -11 3453.25   93.39
  -2   1 -11 3492.25  117.49
   2   1  11 3332.87   93.09
  -2   1 -11 3322.97   93.29
   2   1  11 3334.87  100.79
   2  -1  11 3437.36   98.49
  -2  -1 -11 3188.28  116.99
   2  -1  11 3477.35   93.39
  -2  -1 -11 3419.76   93.19
   2  -1  11 3273.07  101.29
   2  -1  11 3414.26  117.49
   2  -1  11 3339.37   93.39
  -2  -1 -11 3370.16  163.68
  -2  -1 -11 3316.17  100.89
  -2  -1 -11 3410.56   93.09
  -2   1 -12  112.19    9.60
   2   1  12  143.99    6.10
  -2   1 -12  152.98    5.60
   2   1  12  146.39    5.20
  -2   1 -12  134.89    5.20
  -2   1 -12  147.59    5.40
   2   1  12  133.49    5.10
  -2   1 -12  144.49    6.30
  -2   1 -12  143.39    5.50
   2   1  12  146.59    5.20
   2  -1  12  142.49    5.30
  -2  -1 -12  140.79    5.10
  -2  -1 -12  142.29    5.20
   2  -1  12  135.59    4.90
  -2  -1 -12  142.59    5.20
   2  -1  12  135.09    5.50
  -2  -1 -12  131.39    6.00
  -2  -1 -12  147.69    9.10
  -2  -1 -12  145.09    5.00
   2  -1  12  138.29    5.30
   2  -1  12  148.49    6.40
   2   1  13 2219.98   79.09
  -2   1 -13 2362.36   79.59
  -2   1 -13 2194.88   63.39
  -2   1 -13 2274.07   63.39
   2   1  13 2292.97   66.59
  -2   1 -13 2414.06   68.79
  -2   1 -13 2320.57   67.29
   2   1  13 2274.67   63.19
   2   1  13 2210.38   63.19
   2   1  13 2267.87   68.19
   2  -1  13 2242.58   66.49
  -2  -1 -13 2040.40   79.09
  -2  -1 -13 2240.38   60.99
  -2  -1 -13 2232.88   68.29
   2  -1  13 2225.88   68.69
   2  -1  13 2281.57   63.39
  -2  -1 -13 2309.47   63.29
   2  -1  13 2186.38   63.39
  -2  -1 -13 2335.67  111.19
  -2  -1 -13 2301.87   63.29
   2  -1  13 2247.28   79.59
   2   1  14   37.40    2.10
  -2   1 -14   25.50    4.20
  -2   1 -14   36.20    2.60
   2   1  14   35.50    2.20
  -2   1 -14   31.50    2.30
  -2   1 -14   35.60    2.30
   2   1  14   30.60    2.20
   2   1  14   26.70    2.00
  -2   1 -14   33.30    2.30
   2   1  14   40.00    2.00
  -2   1 -14   38.60    2.40
   2  -1  14   28.40    1.80
  -2  -1 -14   28.30    2.30
  -2  -1 -14   34.20    2.10
   2  -1  14   31.60    2.20
   2  -1  14   36.30    2.30
  -2  -1 -14   30.30    3.70
   2  -1  14   39.60    2.70
  -2  -1 -14   30.40    2.10
   2  -1  14   29.00    2.20
  -2   1 -15  975.30   29.60
   2   1  15  937.01   29.10
   2   1  15  913.81   27.30
   2   1  15  951.90   28.20
  -2   1 -15  918.21   27.40
   2   1  15  938.11   33.50
  -2   1 -15  842.42   27.30
   2   1  15  940.61   27.30
  -2   1 -15  946.61   28.90
  -2   1 -15  988.60   34.20
  -2  -1 -15  932.01   26.30
  -2  -1 -15  949.90   29.10
   2  -1  15  925.11   34.10
  -2  -1 -15  974.90   48.00
  -2  -1 -15  845.72   33.60
  -2  -1 -15  950.50   27.30
   2  -1  15  941.01   29.60
   2  -1  15  957.10   27.50
   2  -1  15  932.71   27.50
   2  -1  15  931.71   28.20
  -2   1 -16  169.38    6.70
   2   1  16  179.48    6.20
   2   1  16  170.48    6.40
  -2   1 -16  172.38    6.60
   2   1  16  163.58    6.40
  -2   1 -16  169.18    6.60
  -2   1 -16  185.98    7.90
   2   1  16  167.28    6.40
   2   1  16  170.18    7.20
   2  -1  16  170.08    6.10
  -2  -1 -16  174.98    6.50
   2  -1  16  182.08    6.70
   2  -1  16  165.08    6.60
   2  -1  16  172.48    7.80
  -2  -1 -16  175.38    6.20
   2  -1  16  175.28    6.90
  -2  -1 -16  174.08   11.30
  -2  -1 -16  179.58    6.60
  -2  -1 -16  155.28    7.40
  -2   1 -17  142.49    5.90
  -2   1 -17  143.89    5.90
  -2   1 -17  156.28    7.00
   2   1  17  148.69    5.70
  -2   1 -17  144.59    5.90
   2   1  17  140.09    6.30
  -2   1 -17  113.49   10.60
   2   1  17  148.79    5.40
   2   1  17  138.19    5.70
   2  -1  17  143.39    5.90
  -2  -1 -17  149.19    5.80
  -2  -1 -17  146.89    5.50
   2  -1  17  141.39    5.40
  -2  -1 -17  144.19   10.00
   2  -1  17  150.58    6.90
  -2  -1 -17  135.29    6.60
   2  -1  17  143.09    6.10
   2  -1  17  149.88    6.00
   2   1  18  348.67   11.80
   2   1  18  362.46   12.30
  -2   1 -18  372.26   12.40
  -2   1 -18  384.96   14.80
  -2   1 -18  353.26   12.10
  -2   1 -18  349.37   12.00
   2   1  18  354.86   11.90
   2   1  18  361.26   13.90
   2  -1  18  359.06   12.20
  -2  -1 -18  378.86   12.40
  -2  -1 -18  370.16   21.00
   2  -1  18  354.86   11.80
  -2  -1 -18  335.07   14.20
   2  -1  18  363.06   14.50
   2  -1  18  374.66   12.20
  -2  -1 -18  341.07   11.30
   2  -1  18  362.16   12.80
  -2   1 -19  103.59   10.00
  -2   1 -19  133.29    6.60
  -2   1 -19  119.89    5.50
   2   1  19  121.79    5.40
   2   1  19  118.49    4.90
  -2   1 -19  127.79    5.50
   2   1  19  126.19    5.30
  -2  -1 -19  126.29    5.20
  -2  -1 -19  132.69    5.40
   2  -1  19  115.29    5.60
  -2  -1 -19  128.49    9.50
   2  -1  19  129.19    6.40
   2  -1  19  122.99    5.00
   2  -1  19  127.59    5.60
   2   1  20  243.58    9.10
  -2   1 -20  276.47   11.30
  -2   1 -20  260.97    9.20
  -2   1 -20  198.78   16.20
   2   1  20  238.58    9.00
   2   1  20  243.48    8.70
  -2  -1 -20  257.87   15.90
   2  -1  20  247.08   10.70
   2  -1  20  252.77    9.70
  -2  -1 -20  242.48    8.60
   2  -1  20  256.17    8.70
   2   1  21  539.55   17.30
  -2   1 -21  541.15   17.70
   2   1  21  545.95   17.20
  -2   1 -21  457.85   30.80
   2  -1  21  539.45   18.40
  -2  -1 -21  531.35   16.50
   2  -1  21  550.94   21.00
   2  -1  21  540.95   17.20
  -2  -1 -21  578.34   30.40
   2   1  22  129.79    6.00
   2   1  22  124.29    5.30
  -2   1 -22  134.29    5.80
  -2   1 -22  123.99   11.20
  -2  -1 -22  137.19   10.50
  -2  -1 -22  129.59    5.60
   2  -1  22  129.89    5.30
  -2   1 -23   55.69    3.70
   2   1  23   52.69    3.70
   2   1  23   49.90    3.10
  -2   1 -23   47.50    7.00
  -2  -1 -23   56.39    6.50
   2  -1  23   58.69    3.30
  -2  -1 -23   53.99    3.50
   2   1  24  158.98    6.50
  -2   1 -24  161.38    6.90
  -2   1 -24  154.88   13.20
   2  -1  24  165.98    6.50
  -2  -1 -24  170.68   12.50
  -2  -1 -24  167.58    6.80
   2   1  25   27.20    2.40
  -2   1 -25   23.10    2.80
  -2  -1 -25   18.90    4.70
  -2  -1 -25   23.40    2.60
   2  -1  25   26.60    2.40
   2   1  26   92.29    4.60
  -2   1 -26   87.39    5.00
  -2  -1 -26   90.59    4.90
   2  -1  26   94.09    4.50
   2   1  27   85.79    4.50
  -2   1 -27   96.79    5.20
   2  -1  27   86.09    4.40
   2   1  28   28.30    2.70
  -2   1 -28   25.30    3.10
   2  -1  28   34.70    2.80
  -2   1 -29  246.78    9.60
   2   1  29  233.78    9.20
   2  -1  29  235.38    9.00
  -2   1 -30   18.10    3.10
   2   1  30   18.70    2.40
   2  -1  30   16.40    2.20
   2   1  31   34.50    3.00
  -2   1 -31   37.90    3.80
   2  -1  31   40.10    3.10
   2   1  32    7.20    1.70
   2  -1  32   10.20    1.90
   2   1  33   35.70    3.20
   2  -1  33   43.90    3.30
   2   1  34    2.80    1.60
   2  -1  34    1.70    1.40
   2   1  35   45.70    3.60
   2  -1  35   41.80    3.40
   2   1  36    8.50    2.10
   2  -1  36    9.40    2.00
   2   2 -35   47.40    4.90
  -2   2  35   51.69    3.90
  -2   2  34   30.00    3.20
   2   2 -34   27.50    4.10
   2   2 -33   48.60    4.90
  -2   2  33   51.79    3.80
  -2   2  32   22.80    2.80
   2   2 -32   23.10    3.80
  -2  -2  32   27.50    2.60
   2   2 -31  102.49    6.10
  -2   2  31   96.59    5.20
  -2  -2  31  106.59    5.00
   2  -2 -31  107.19    5.90
  -2   2  30   39.00    3.10
   2   2 -30   35.80    3.80
   2  -2 -30   37.60    3.80
  -2  -2  30   35.50    2.80
   2   2 -29   29.10    3.50
  -2   2  29   39.10    3.00
   2  -2 -29   37.40    3.60
  -2  -2  29   36.20    2.80
  -2   2  28   42.90    3.20
   2   2 -28   37.90    3.70
  -2  -2  28   42.80    3.00
   2  -2 -28   47.50    3.70
   2   2 -27  221.18    9.20
  -2   2  27  229.98    8.70
  -2  -2  27  229.68    8.30
   2  -2 -27  211.48    8.70
  -2   2  26    3.00    1.50
   2   2 -26    5.20    2.00
  -2  -2  26    5.70    1.40
   2  -2 -26    7.90    1.90
  -2   2  25  162.78    6.50
   2   2 -25  154.58    7.10
   2  -2 -25  153.38   11.50
  -2  -2  25  154.98    6.20
   2  -2 -25  159.28    6.80
  -2   2  24   13.80    1.90
   2   2 -24    8.00    3.80
   2   2 -24   13.00    2.40
  -2  -2  24   14.70    1.80
   2  -2 -24   13.60    2.10
   2  -2 -24    9.10    3.10
   2   2 -23  383.46   13.20
  -2   2  23  403.36   12.40
   2   2 -23  292.07   22.60
   2  -2 -23  324.07   21.00
  -2  -2  23  383.86   12.10
   2  -2 -23  377.46   12.20
   2   2 -22   14.50    4.40
  -2   2  22   16.60    1.80
   2   2 -22   14.60    2.30
  -2  -2  22   20.60    1.90
   2  -2 -22   13.70    3.30
  -2   2  21   37.50    2.50
   2   2 -21   28.10    5.60
   2   2 -21   42.50    3.30
   2  -2 -21   32.70    4.20
  -2  -2  21   38.80    2.50
   2  -2 -21   37.70    2.80
  -2   2  20  128.29    5.70
   2   2 -20  131.49    6.00
  -2   2  20  134.99    5.80
  -2   2  20  129.09    5.10
   2   2 -20  133.89    6.00
   2   2 -20   98.19   10.10
  -2  -2  20  142.89    5.60
   2  -2 -20  134.49    5.50
   2  -2 -20  120.39    9.10
  -2  -2  20  130.39    6.80
  -2  -2  20  129.69    5.00
   2   2 -19   77.89    8.10
  -2   2  19   86.69    4.30
   2   2 -19   91.59    4.70
  -2   2  19   96.29    4.50
   2   2 -19   97.19    5.10
  -2   2  19   89.69    3.90
   2   2 -19   92.69    4.70
  -2  -2  19   87.09    4.30
   2  -2 -19   91.09    4.20
  -2  -2  19   91.89    3.80
  -2  -2  19   89.39    5.30
   2  -2 -19   89.59    7.10
  -2   2  18   29.70    2.30
   2   2 -18   31.10    2.70
   2   2 -18   28.10    2.40
   2   2 -18   30.80    2.70
   2   2 -18   22.30    4.50
  -2   2  18   30.40    2.30
   2  -2 -18   25.60    2.20
  -2  -2  18   30.20    1.90
  -2  -2  18   28.90    2.80
  -2  -2  18   25.10    2.40
  -2  -2  18   28.40    2.60
   2  -2 -18   28.20    3.60
   2   2 -17  111.59    5.10
  -2   2  17  114.49    4.80
   2   2 -17  113.29    5.00
  -2   2  17  101.59    4.70
   2   2 -17  102.49    5.50
   2   2 -17   92.29    8.60
  -2  -2  17  110.39    4.60
   2  -2 -17  110.09    4.50
  -2  -2  17  105.49    4.10
  -2  -2  17  110.49    5.30
   2  -2 -17  108.09    7.70
  -2  -2  17  106.89    5.80
   2   2 -16  192.18    7.20
   2   2 -16  195.38    7.40
   2   2 -16  168.08   12.40
  -2   2  16  180.88    6.80
  -2   2  16  183.38    7.10
   2   2 -16  178.38    8.20
  -2  -2  16  189.08    6.30
  -2  -2  16  184.48    6.60
   2  -2 -16  190.18    7.10
   2  -2 -16  184.68   11.40
  -2  -2  16  178.28    8.50
  -2  -2  16  188.98    7.70
   2  -2 -16  188.88    6.50
  -2   2  15  192.88    7.20
   2   2 -15  196.48    7.50
   2   2 -15  184.38   12.80
   2   2 -15  193.68    8.50
   2   2 -15  190.28    7.20
  -2   2  15  204.88    7.60
   2   2 -15  202.78    7.40
  -2   2  15  196.68    7.00
  -2  -2  15  186.28    7.30
  -2  -2  15  191.38    8.80
   2  -2 -15  204.08    7.40
   2  -2 -15  195.48   11.70
  -2  -2  15  187.78    7.80
   2  -2 -15  195.58    6.70
  -2  -2  15  204.48    6.90
  -2  -2  15  189.18    6.50
  -2   2  14  160.48    5.90
   2   2 -14  165.98    6.40
   2   2 -14  163.58    6.30
  -2   2  14  158.58    6.10
   2   2 -14  150.98   10.80
   2   2 -14  160.68    7.30
  -2   2  14  159.58    6.50
   2   2 -14  162.08    6.20
  -2   2  14  165.38    5.90
   2  -2 -14  163.18    9.90
  -2  -2  14  156.08    6.70
   2  -2 -14  158.28    6.20
   2  -2 -14  157.28    5.60
   2  -2 -14  166.78    5.90
  -2  -2  14  166.28    7.60
  -2  -2  14  168.58    6.40
  -2  -2  14  164.08    5.50
  -2  -2  14  167.58    5.90
   2   2 -13   75.19    6.30
   2   2 -13   78.49    3.70
  -2   2  13   83.49    3.50
   2   2 -13   74.79    3.70
  -2   2  13   70.49    3.50
  -2   2  13   79.09    3.50
   2   2 -13   85.19    3.80
  -2   2  13   74.29    3.40
   2   2 -13   77.59    4.20
  -2  -2  13   74.39    4.40
   2  -2 -13   77.19    3.30
   2  -2 -13   80.39    3.60
  -2  -2  13   79.59    3.40
   2  -2 -13   81.59    3.40
  -2  -2  13   73.69    3.90
  -2  -2  13   77.59    3.80
   2  -2 -13   78.99    5.60
  -2  -2  13   78.79    2.90
  -2  -2  13   79.29    3.70
   2   2 -12  323.07   10.20
  -2   2  12  318.07    9.60
   2   2 -12  313.67   17.40
   2   2 -12  308.27   10.00
  -2   2  12  296.67   10.20
   2   2 -12  298.37    9.90
   2   2 -12  292.67   12.10
  -2   2  12  287.17    9.50
  -2   2  12  284.57   11.30
   2  -2 -12  300.87   16.40
  -2  -2  12  306.37    9.40
  -2  -2  12  295.27   10.80
  -2  -2  12  312.67   10.10
  -2  -2  12  302.87    9.40
   2  -2 -12  318.27    9.60
   2  -2 -12  311.87   10.30
   2  -2 -12  299.97    9.20
  -2  -2  12  304.77   10.00
  -2  -2  12  301.07   12.40
  -2   2  11  395.56   14.10
  -2   2  11  376.86   12.70
   2   2 -11  386.26   12.20
   2   2 -11  376.06   12.20
   2   2 -11  376.06   15.00
   2   2 -11  394.46   21.20
   2   2 -11  404.46   12.50
  -2   2  11  375.46   11.80
  -2   2  11  409.86   11.90
   2   2 -11  398.46   13.30
  -2  -2  11  391.36   12.30
  -2  -2  11  374.96   13.30
  -2  -2  11  395.86   12.20
   2  -2 -11  389.16   20.40
   2  -2 -11  392.76   11.80
   2  -2 -11  378.06   11.30
   2  -2 -11  400.76   12.80
  -2  -2  11  386.36   11.60
  -2  -2  11  386.36   15.30
  -2   2  10  384.56   13.40
   2   2 -10  384.06   20.10
   2   2 -10  346.97   14.30
  -2   2  10  353.86   12.00
   2   2 -10  389.46   12.70
  -2   2  10  375.86   11.20
   2   2 -10  363.86   11.50
   2   2 -10  363.66   11.60
  -2   2  10  361.96   11.20
   2  -2 -10  376.76   11.20
   2  -2 -10  359.76   19.30
  -2  -2  10  347.17   12.60
  -2  -2  10  371.36   14.60
  -2  -2  10  382.96   11.70
  -2  -2  10  380.56   11.60
   2  -2 -10  363.36   10.70
   2  -2 -10  384.16   12.10
  -2   2   9  660.13   31.20
  -2   2   9  605.84   22.00
   2   2  -9  637.74   19.90
   2   2  -9  635.44   31.80
   2   2  -9  635.04   18.30
  -2   2   9  611.54   21.80
  -2   2   9  625.64   17.80
   2   2  -9  611.14   18.20
   2   2  -9  586.74   22.80
  -2   2   9  612.24   17.80
  -2   2   9  603.64   19.30
   2  -2  -9  604.54   18.10
  -2  -2   9  580.74   19.80
  -2  -2   9  627.04   18.30
   2  -2  -9  599.84   17.10
  -2  -2   9  606.64   23.00
   2  -2  -9  631.64   17.80
   2  -2  -9  636.14   17.80
   2  -2  -9  620.64   19.40
  -2  -2   9  617.84   18.20
   2   2  -8   38.50    2.10
  -2   2   8   37.30    2.00
  -2   2   8   36.90    1.80
   2   2  -8   32.80    2.50
  -2   2   8   35.90    1.80
  -2   2   8   40.70    3.10
   2   2  -8   35.80    2.00
   2   2  -8   34.80    2.20
  -2   2   8   36.60    1.90
   2   2  -8   36.80    3.50
   2  -2  -8   36.80    1.90
  -2  -2   8   38.80    2.70
  -2  -2   8   36.50    2.20
  -2  -2   8   37.80    2.10
   2  -2  -8   40.30    2.00
  -2  -2   8   37.20    2.10
   2  -2  -8   38.10    1.80
   2  -2  -8   36.90    1.70
  -2   2   7  160.88    6.50
  -2   2   7  173.58    9.20
  -2   2   7  168.68    5.20
  -2   2   7  165.38    5.20
   2   2  -7  170.88    6.20
  -2   2   7  163.08    5.80
   2   2  -7  156.88    7.10
   2   2  -7  164.18    9.80
   2   2  -7  163.98    5.60
   2   2  -7  166.98    5.60
  -2  -2   7  165.38    5.60
  -2  -2   7  161.38    6.20
  -2  -2   7  172.68    5.70
  -2  -2   7  170.58    7.30
   2  -2  -7  169.08    5.20
   2  -2  -7  162.18    5.20
   2  -2  -7  168.58    5.90
   2  -2  -7  164.58    5.50
   2   2  -6  301.97   16.60
   2   2  -6  310.37    9.40
   2   2  -6  303.37    9.40
   2   2  -6  320.97   10.40
  -2   2   6  293.97   10.00
  -2   2   6  311.07    9.00
  -2   2   6  307.77    9.00
   2   2  -6  290.37   12.00
  -2   2   6  330.97   16.00
  -2   2   6  305.97   11.40
  -2  -2   6  313.67    9.60
   2  -2  -6  307.07    9.40
  -2  -2   6  305.37    9.40
   2  -2  -6  311.97   10.10
   2  -2  -6  312.57    9.00
  -2  -2   6  302.17   10.40
  -2  -2   6  307.57   12.10
   2  -2  -6  307.77    8.90
   2   2  -5  212.18    6.80
  -2   2   5  221.38    6.40
   2   2  -5  220.38    7.50
  -2   2   5  211.78    8.30
  -2   2   5  216.28    6.40
  -2   2   5  216.68    7.30
   2   2  -5  221.48   12.20
   2   2  -5  215.38    6.80
  -2  -2   5  208.48    7.50
   2  -2  -5  213.58    6.80
  -2  -2   5  220.48    8.90
  -2  -2   5  211.68    6.70
   2  -2  -5  215.18    6.30
   2  -2  -5  220.68    6.30
  -2  -2   5  214.48    6.80
   2   2  -4  935.91   35.00
  -2   2   4  939.11   29.80
   2   2  -4  966.60   48.60
  -2   2   4  981.80   27.00
   2   2  -4  995.00   27.40
   2   2  -4  981.50   30.00
  -2   2   4 1006.10   27.00
   2   2  -4  964.80   27.40
  -2   2   4  924.51   34.50
   2  -2  -4 1003.00   26.90
   2  -2  -4  988.60   26.90
  -2  -2   4  997.30   28.30
  -2  -2   4  976.70   35.00
  -2  -2   4  981.60   27.40
   2  -2  -4  970.80   27.60
  -2  -2   4  968.70   27.40
  -2  -2   4  971.40   30.00
   2  -2  -4 1005.40   34.50
  -2   2   3  478.75   13.30
   2   2  -3  489.65   13.80
   2   2  -3  489.05   24.80
   2   2  -3  468.95   13.80
  -2   2   3  467.65   15.10
   2   2  -3  482.15   14.20
  -2   2   3  486.95   13.30
  -2   2   3  471.55   17.50
   2   2  -3  466.45   17.80
  -2   2   3  485.45   15.10
   2   2  -3  484.35   15.20
  -2  -2   3  464.65   13.70
   2  -2  -3  480.15   14.00
  -2  -2   3  491.25   13.80
   2  -2  -3  487.35   17.50
  -2  -2   3  481.35   14.10
  -2  -2   3  483.95   17.90
  -2  -2   3  472.55   15.20
  -2  -2   3  488.35   24.80
  -2   2   2  389.06   14.90
   2   2  -2  394.06   21.00
   2   2  -2  413.86   11.60
   2   2  -2  401.56   11.90
   2   2  -2  390.56   15.10
   2   2  -2  401.86   11.60
  -2   2   2  412.96   12.90
   2   2  -2  405.36   12.80
  -2  -2   2  397.76   12.90
  -2  -2   2  409.36   11.60
   2  -2  -2  409.16   11.90
  -2  -2   2  403.86   11.60
  -2  -2   2  390.56   11.50
   2  -2  -2  400.06   14.90
  -2  -2   2  411.66   11.80
  -2  -2   2  416.86   15.30
   2   2  -1 3513.45   99.79
  -2   2   1 3262.77  121.59
   2   2  -1 3300.37  121.89
  -2   2   1 3572.84  104.89
   2   2  -1 3535.45  104.79
   2   2  -1 3540.65   95.99
  -2   2   1 3561.54  169.38
   2   2  -1 3645.84   95.99
   2   2  -1 3554.94  169.78
  -2  -2   1 3429.26   95.99
  -2  -2   1 3518.35  104.79
   2  -2  -1 3538.35   96.99
  -2  -2   1 3494.15  121.89
   2  -2  -1 3486.55  121.69
  -2  -2   1 3556.94   95.99
   2  -2  -1 3542.65  104.89
  -2   2   0  211.88    7.20
   2   2   0  214.68    6.10
  -2   2   0  207.48   11.40
   2   2   0  208.98    6.20
  -2   2   0  212.98    5.90
  -2   2   0  200.78    8.30
   2   2   0  219.38    7.00
  -2   2   0  213.38    5.90
   2   2   0  208.08    6.30
   2   2   0  203.38    8.40
   2   2   0  208.58    6.20
  -2  -2   0  213.18    7.00
   2  -2   0  205.98    5.90
   2  -2   0  215.78    5.90
  -2  -2   0  205.98    6.10
  -2  -2   0  215.58    6.10
   2  -2   0  202.88    7.10
   2  -2   0  212.88    8.40
  -2   2  -1 3231.18  121.29
   2   2   1 3286.97  121.39
   2   2   1 3613.04  104.29
  -2   2  -1 3578.74  104.69
   2   2   1 3549.24   95.59
  -2   2  -1 3488.35  168.88
  -2   2  -1 3523.85   95.59
   2   2   1 3596.14   95.59
  -2   2  -1 3539.95   95.59
   2  -2   1 3477.15   95.49
   2  -2   1 3458.05  121.49
  -2  -2  -1 3408.56   95.59
   2  -2   1 3461.75   95.59
  -2  -2  -1 3572.84  104.29
   2  -2   1 3577.34  168.98
  -2  -2  -1 3550.64   95.59
   2  -2   1 3450.35  104.59
  -2   2  -2  405.96   20.80
  -2   2  -2  406.46   13.00
  -2   2  -2  398.86   11.40
   2   2   2  411.36   11.40
   2   2   2  402.26   12.60
   2   2   2  407.76   11.40
  -2   2  -2  403.06   11.40
  -2   2  -2  380.36   15.00
   2  -2   2  414.46   11.50
  -2  -2  -2  394.26   11.30
   2  -2   2  398.86   15.20
   2  -2   2  392.76   11.40
  -2  -2  -2  406.06   12.60
   2  -2   2  393.86   13.00
  -2  -2  -2  409.26   11.30
   2  -2   2  414.46   20.80
  -2   2  -3  474.75   15.20
  -2   2  -3  449.56   17.60
   2   2   3  470.45   13.40
   2   2   3  472.65   14.70
  -2   2  -3  484.55   13.60
  -2   2  -3  487.35   24.40
   2   2   3  485.65   13.40
  -2   2  -3  469.55   13.60
   2  -2   3  467.05   15.20
   2  -2   3  476.55   13.60
  -2  -2  -3  490.45   13.40
   2  -2   3  491.95   24.50
  -2  -2  -3  473.85   13.40
   2  -2   3  477.65   17.80
  -2  -2  -3  486.15   14.70
   2  -2   3  468.45   13.50
  -2  -2  -3  471.95   13.60
  -2   2  -4  975.80   27.20
   2   2   4  972.50   29.30
  -2   2  -4  986.90   29.90
   2   2   4  946.01   26.90
  -2   2  -4  947.41   27.10
   2   2   4  993.30   26.90
  -2   2  -4  917.51   34.70
  -2   2  -4  978.60   48.10
   2  -2   4  988.20   27.20
   2  -2   4  977.80   34.90
  -2  -2  -4  976.50   27.20
   2  -2   4  954.10   27.10
  -2  -2  -4  978.20   26.90
  -2  -2  -4  953.90   26.90
   2  -2   4  960.80   30.00
   2  -2   4 1016.00   48.30
  -2   2  -5  212.78    6.70
   2   2   5  220.68    6.40
  -2   2  -5  211.88    7.50
   2   2   5  211.78    6.90
  -2   2  -5  208.88    6.70
   2   2   5  216.38    6.90
  -2   2  -5  227.18   12.10
   2   2   5  211.28    6.40
  -2   2  -5  206.28    8.70
   2   2   5  222.48   11.80
   2  -2   5  216.58    6.70
   2  -2   5  207.18    7.50
  -2  -2  -5  209.18    6.40
   2  -2   5  220.18    6.70
   2  -2   5  224.48    9.00
  -2  -2  -5  221.48    6.40
  -2  -2  -5  220.88    6.60
   2   2   6  302.27    9.60
   2   2   6  305.47    9.60
   2   2   6  300.47    9.00
  -2   2  -6  306.07   10.30
  -2   2  -6  320.67   16.50
  -2   2  -6  299.67    9.20
  -2   2  -6  294.97   11.90
   2   2   6  307.27    9.00
  -2   2  -6  311.97    9.30
   2  -2   6  315.07    9.30
  -2  -2  -6  310.67    9.00
   2  -2   6  298.87   10.30
  -2  -2  -6  304.17    8.90
   2  -2   6  304.97   12.10
   2   2   7  155.68    5.10
  -2   2  -7  152.08    7.00
   2   2   7  165.78    5.40
   2   2   7  163.58    5.20
  -2   2  -7  170.68    9.80
   2   2   7  162.78    6.50
  -2   2  -7  160.88    5.50
  -2   2  -7  165.18    5.50
  -2   2  -7  168.98    6.10
   2  -2   7  163.28    5.40
  -2  -2  -7  166.98    5.20
   2  -2   7  164.48    7.20
  -2  -2  -7  166.78    5.20
   2  -2   7  159.88    6.10
  -2   2  -8   38.20    2.60
  -2   2  -8   37.40    2.20
   2   2   8   36.40    1.80
  -2   2  -8   35.20    2.00
  -2   2  -8   39.00    2.00
   2   2   8   38.80    1.70
   2   2   8   36.70    1.70
  -2   2  -8   41.10    3.70
   2   2   8   38.50    2.10
   2  -2   8   34.60    2.00
   2  -2   8   39.90    2.70
  -2  -2  -8   39.20    1.80
  -2  -2  -8   38.30    1.80
  -2  -2  -8   39.70    1.70
   2  -2   8   36.60    2.30
  -2   2  -9  619.84   31.90
   2   2   9  600.24   18.80
   2   2   9  618.84   17.60
  -2   2  -9  601.64   22.60
  -2   2  -9  624.84   18.00
   2   2   9  601.54   17.60
   2   2   9  626.64   22.10
  -2   2  -9  600.14   17.90
  -2   2  -9  611.34   19.60
   2  -2   9  616.54   22.90
  -2  -2  -9  626.54   18.80
   2  -2   9  572.34   19.60
  -2  -2  -9  617.34   17.60
  -2  -2  -9  588.74   31.10
  -2  -2  -9  596.04   17.00
   2  -2   9  617.14   18.00
   2  -2   9  619.14   18.00
  -2  -2  -9  630.24   17.70
  -2   2 -10  363.36   12.30
   2   2  10  355.96   11.00
   2   2  10  360.16   11.50
  -2   2 -10  354.46   11.30
  -2   2 -10  371.06   20.30
  -2   2 -10  359.16   14.20
  -2   2 -10  367.86   11.30
   2   2  10  366.16   13.60
   2   2  10  365.96   11.00
   2  -2  10  368.16   11.40
  -2  -2 -10  355.26   19.40
  -2  -2 -10  358.26   10.60
   2  -2  10  369.66   11.30
  -2  -2 -10  366.26   11.00
   2  -2  10  365.96   14.40
   2  -2  10  362.36   10.80
   2  -2  10  338.87   12.30
  -2  -2 -10  380.66   11.00
  -2  -2 -10  373.86   11.50
  -2   2 -11  380.46   15.00
   2   2  11  385.16   11.70
  -2   2 -11  386.06   12.10
  -2   2 -11  395.96   13.10
  -2   2 -11  366.76   21.50
   2   2  11  368.56   11.70
  -2   2 -11  372.16   12.00
  -2   2 -11  402.76   12.60
   2   2  11  382.96   12.30
   2   2  11  386.76   14.60
  -2  -2 -11  393.76   11.80
   2  -2  11  390.76   11.50
   2  -2  11  387.86   12.00
  -2  -2 -11  380.36   20.70
   2  -2  11  399.26   15.40
   2  -2  11  370.56   13.10
   2  -2  11  399.36   12.20
  -2  -2 -11  412.96   12.30
  -2  -2 -11  375.86   11.30
  -2   2 -12  288.87    9.70
  -2   2 -12  321.07   10.30
   2   2  12  303.57    9.50
  -2   2 -12  289.07   17.70
   2   2  12  306.47    9.80
  -2   2 -12  305.77   12.20
   2   2  12  290.07   11.70
   2   2  12  288.07    9.50
  -2   2 -12  287.37    9.80
  -2  -2 -12  299.77    9.50
   2  -2  12  298.57    9.30
  -2  -2 -12  291.17    9.10
   2  -2  12  309.27    9.90
   2  -2  12  311.97   12.50
   2  -2  12  287.67   10.60
  -2  -2 -12  297.07   16.60
   2  -2  12  306.47    9.80
  -2  -2 -12  314.77    9.80
   2   2  13   79.99    3.30
   2   2  13   70.39    4.00
  -2   2 -13   79.39    3.80
  -2   2 -13   82.09    4.40
   2   2  13   70.99    3.30
  -2   2 -13   77.49    3.70
   2   2  13   82.29    3.40
  -2   2 -13   76.39    3.60
  -2   2 -13   68.79    6.60
  -2  -2 -13   77.79    3.20
   2  -2  13   82.29    3.40
  -2  -2 -13   79.39    5.90
  -2  -2 -13   78.59    3.20
  -2  -2 -13   67.09    3.20
   2  -2  13   79.49    4.50
   2  -2  13   75.09    2.80
   2  -2  13   73.79    3.90
   2  -2  13   84.69    3.80
   2   2  14  149.09    7.00
  -2   2 -14  170.68    6.40
  -2   2 -14  163.88    6.20
  -2   2 -14  162.98    7.40
   2   2  14  153.38    5.80
   2   2  14  164.68    5.90
   2   2  14  162.08    5.80
  -2   2 -14  160.88    6.20
  -2   2 -14  140.99   11.10
   2  -2  14  165.28    5.30
  -2  -2 -14  166.58    5.90
   2  -2  14  154.28    6.60
   2  -2  14  165.68    6.30
  -2  -2 -14  161.08    5.60
  -2  -2 -14  159.08   10.20
   2  -2  14  160.98    5.80
   2  -2  14  167.58    7.70
  -2   2 -15  159.98   12.80
  -2   2 -15  196.18    8.60
  -2   2 -15  193.08    7.10
   2   2  15  188.38    6.80
   2   2  15  200.98    6.90
  -2   2 -15  201.98    7.50
   2   2  15  174.38    8.20
  -2  -2 -15  195.78    6.90
   2  -2  15  192.88    7.70
  -2  -2 -15  191.48   11.90
   2  -2  15  198.78    6.80
   2  -2  15  189.48    7.20
   2  -2  15  198.28    6.40
  -2  -2 -15  192.18    6.60
   2  -2  15  202.08    9.00
   2  -2  15  193.48    6.30
   2   2  16  189.28    6.40
  -2   2 -16  191.88    7.30
   2   2  16  179.28    8.00
   2   2  16  186.78    6.80
   2   2  16  189.38    6.80
  -2   2 -16  190.18    8.50
  -2   2 -16  180.38    7.00
  -2   2 -16  145.99   12.50
   2  -2  16  192.48    7.70
  -2  -2 -16  187.68    6.80
  -2  -2 -16  185.28    6.50
  -2  -2 -16  193.18    7.80
   2  -2  16  189.08    6.30
   2  -2  16  199.68    8.80
   2  -2  16  187.58    6.20
   2  -2  16  181.88    6.60
  -2  -2 -16  176.78   11.60
   2   2  17  112.59    4.50
   2   2  17  110.99    5.30
  -2   2 -17  109.59    5.00
  -2   2 -17   92.89    9.10
   2   2  17  104.79    4.20
  -2   2 -17  109.69    5.10
   2   2  17  109.59    4.70
   2  -2  17  110.39    5.30
  -2  -2 -17  110.79    4.60
   2  -2  17  109.29    4.10
   2  -2  17  116.39    6.10
   2  -2  17  105.29    4.60
  -2  -2 -17  106.59    5.10
  -2  -2 -17  112.99    4.60
  -2  -2 -17  102.69    7.90
  -2   2 -18   27.50    2.50
  -2   2 -18   27.30    2.40
   2   2  18   29.40    2.00
  -2   2 -18   25.80    5.20
   2   2  18   33.30    2.40
  -2  -2 -18   31.10    2.30
   2  -2  18   32.20    3.00
  -2  -2 -18   28.90    3.80
   2  -2  18   31.40    2.40
   2  -2  18   27.10    1.80
   2  -2  18   32.60    2.80
   2   2  19   89.99    4.30
  -2   2 -19   70.49    8.10
  -2   2 -19   95.19    4.70
  -2   2 -19   93.19    4.60
   2   2  19   91.79    3.90
  -2  -2 -19   90.19    4.20
   2  -2  19   88.79    4.80
   2  -2  19   95.59    4.40
  -2  -2 -19   81.79    7.10
   2  -2  19   87.69    3.70
  -2   2 -20  133.79    6.00
   2   2  20  132.79    5.20
  -2   2 -20  138.49    6.00
  -2   2 -20   99.19   10.30
   2   2  20  137.89    5.80
  -2  -2 -20  131.29    5.40
  -2  -2 -20  123.89    9.60
   2  -2  20  134.39    5.60
   2  -2  20  133.79    5.00
  -2   2 -21   28.40    6.00
   2   2  21   38.20    2.50
  -2   2 -21   41.30    3.10
  -2   2 -21   33.60    3.00
  -2  -2 -21   40.10    2.90
   2  -2  21   38.30    2.40
  -2  -2 -21   36.70    4.70
   2   2  22   16.80    1.90
  -2   2 -22   16.60    2.30
  -2   2 -22   12.60    4.20
  -2  -2 -22   15.60    3.70
   2  -2  22   20.10    1.90
  -2  -2 -22   20.10    2.30
  -2   2 -23  380.36   13.50
   2   2  23  387.46   12.80
   2  -2  23  386.66   12.50
  -2  -2 -23  342.57   22.30
  -2  -2 -23  391.36   12.60
  -2   2 -24   10.60    2.10
   2   2  24   15.40    1.90
   2  -2  24   13.10    1.70
  -2  -2 -24   11.90    3.60
  -2  -2 -24   15.10    2.10
  -2   2 -25  155.08    7.10
   2   2  25  154.98    6.40
  -2  -2 -25  147.29   11.80
   2  -2  25  168.08    6.20
  -2  -2 -25  158.08    6.80
   2   2  26   10.80    1.70
  -2   2 -26    4.90    1.80
   2  -2  26    6.00    1.40
  -2  -2 -26    7.30    1.80
  -2   2 -27  220.68    9.10
   2   2  27  215.58    8.50
   2  -2  27  225.68    8.30
  -2  -2 -27  234.88    8.90
   2   2  28   39.70    3.00
  -2   2 -28   38.30    3.70
  -2  -2 -28   45.50    3.60
   2  -2  28   42.60    2.90
   2   2  29   31.60    2.80
  -2   2 -29   32.00    3.60
   2  -2  29   32.50    2.60
  -2  -2 -29   32.70    3.50
  -2   2 -30   34.90    3.80
   2   2  30   43.10    3.20
   2  -2  30   40.40    3.00
  -2  -2 -30   37.70    3.70
  -2   2 -31   95.39    5.90
   2   2  31   94.89    5.10
   2  -2  31  105.99    4.90
   2  -2  31  104.19    4.90
   2   2  32   26.10    2.90
  -2   2 -32   22.80    3.70
  -2   2 -33   42.90    4.70
   2   2  33   51.59    3.80
  -2   2 -34   24.80    4.10
   2   2  34   31.90    3.30
  -2   2 -35   50.69    5.00
   2   2  35   49.99    3.90
   2   3 -34   -0.10    3.20
  -2   3  34    0.70    1.60
   2  -3 -34    3.50    2.00
   2   3 -33    0.20    2.80
   2  -3 -33    2.90    1.90
   2   3 -32    1.50    2.70
   2  -3 -32    9.00    2.30
   2   3 -31   12.30    3.10
   2  -3 -31   14.10    2.50
   2   3 -30    1.30    2.10
   2  -3 -30    2.20    1.70
   2   3 -29   58.49    4.60
   2  -3 -29   59.59    4.20
   2   3 -28    3.00    2.00
   2  -3 -28    3.80    1.70
   2   3 -27   32.10    3.50
   2  -3 -27   39.90    3.30
   2   3 -26   11.10    2.30
   2  -3 -26   16.20    2.30
   2   3 -25   39.30    3.60
   2  -3 -25   47.10    3.50
   2   3 -24   71.09    4.70
   2  -3 -24   75.29    4.30
   2   3 -23   64.59    4.30
   2  -3 -23   65.59    3.80
   2   3 -22   82.59    4.90
   2  -3 -22   89.19    4.40
  -2  -3  22   95.19    4.80
   2  -3 -22   80.99    7.30
   2   3 -21  265.07   19.70
   2   3 -21  330.77   11.40
   2   3 -21  302.57   11.60
   2  -3 -21  321.07   10.40
  -2  -3  21  324.97   10.70
   2  -3 -21  292.97   18.20
   2   3 -20  149.59   12.60
   2   3 -20  164.08    7.30
   2   3 -20  171.08    7.20
   2  -3 -20  174.58    6.50
   2  -3 -20  166.88   11.20
  -2  -3  20  170.58    6.80
   2   3 -19   73.29    4.20
   2   3 -19   69.59    4.20
   2   3 -19   68.09    7.50
   2  -3 -19   68.99    6.20
   2  -3 -19   74.79    3.70
  -2  -3  19   77.69    4.00
   2   3 -18  126.59    5.90
   2   3 -18  124.79   10.40
   2   3 -18  126.89    5.90
   2  -3 -18  142.09    5.40
  -2  -3  18  135.59    5.60
   2  -3 -18  130.39    9.10
   2   3 -17  220.28   14.80
  -2   3  17  220.18    8.30
   2   3 -17  215.38    8.50
   2   3 -17  225.78    8.40
   2  -3 -17  225.28   13.50
  -2  -3  17  217.98    7.90
   2  -3 -17  227.88    7.60
   2   3 -16  124.69    9.50
  -2   3  16  120.79    5.10
   2   3 -16  116.99    5.40
  -2   3  16  119.99    4.90
   2   3 -16  120.09    5.40
   2  -3 -16  128.49    5.30
  -2  -3  16  117.29    5.00
   2  -3 -16  117.09    4.70
   2   3 -15  246.48    8.90
   2   3 -15  250.27   15.70
   2   3 -15  261.57    9.10
  -2   3  15  247.08    8.90
  -2   3  15  242.78    8.40
   2  -3 -15  264.27    9.10
   2  -3 -15  245.98    8.10
  -2  -3  15  251.47   11.30
  -2  -3  15  239.38    9.80
  -2  -3  15  243.08    8.40
  -2   3  14   15.10    1.70
  -2   3  14   15.80    1.60
   2   3 -14   15.80    1.90
   2   3 -14   14.20    3.10
   2   3 -14   15.10    1.70
  -2  -3  14   15.80    2.20
  -2  -3  14   19.10    2.60
   2  -3 -14   16.10    1.60
  -2  -3  14   13.70    1.70
   2  -3 -14   18.30    1.90
  -2   3  13  457.05   14.20
   2   3 -13  462.45   14.80
  -2   3  13  466.85   17.40
  -2   3  13  467.85   15.40
   2   3 -13  471.25   25.90
  -2   3  13  502.85   17.30
   2   3 -13  465.15   15.00
   2  -3 -13  463.05   13.70
  -2  -3  13  461.35   16.30
  -2  -3  13  478.65   18.90
   2  -3 -13  486.35   15.60
  -2  -3  13  473.65   14.10
  -2   3  12   20.40    1.70
  -2   3  12   19.90    1.50
   2   3 -12   20.90    2.30
  -2   3  12   17.90    1.50
   2   3 -12   17.00    1.40
  -2   3  12   19.50    1.60
   2   3 -12   19.20    1.90
  -2   3  12   18.30    1.70
   2   3 -12   19.20    3.30
  -2  -3  12   18.60    1.80
   2  -3 -12   19.40    1.70
   2  -3 -12   17.00    1.50
   2  -3 -12   17.80    1.50
  -2  -3  12   21.40    2.40
  -2  -3  12   20.50    2.20
  -2   3  11  503.25   16.10
  -2   3  11  498.25   18.40
  -2   3  11  484.95   14.70
   2   3 -11  469.65   19.20
   2   3 -11  492.35   26.80
   2   3 -11  484.55   15.30
  -2   3  11  518.65   18.10
   2   3 -11  506.05   15.30
  -2   3  11  506.35   14.70
  -2  -3  11  512.05   14.60
  -2  -3  11  508.85   19.70
  -2  -3  11  484.95   15.60
  -2  -3  11  469.25   16.80
   2  -3 -11  501.45   14.60
   2  -3 -11  498.15   15.20
   2  -3 -11  493.75   14.10
   2  -3 -11  517.15   16.20
   2   3 -10    8.30    1.20
   2   3 -10    4.30    1.80
  -2   3  10    5.30    1.10
  -2   3  10    8.40    1.10
  -2   3  10    5.90    0.90
  -2   3  10    7.30    0.90
   2   3 -10    6.20    1.50
   2   3 -10    6.70    1.20
  -2  -3  10    5.90    1.30
   2  -3 -10    5.60    1.10
  -2  -3  10    4.30    1.00
   2  -3 -10    8.40    0.90
   2  -3 -10    5.50    1.10
  -2  -3  10    7.40    1.80
  -2  -3  10    7.70    1.10
   2  -3 -10    5.90    0.90
  -2   3   9   81.89    3.40
  -2   3   9   75.29    3.80
  -2   3   9   76.99    2.90
  -2   3   9   76.99    2.80
   2   3  -9   82.79    3.40
   2   3  -9   71.69    5.90
   2   3  -9   69.99    4.30
   2   3  -9   74.59    3.40
  -2  -3   9   73.59    3.20
  -2  -3   9   75.89    3.20
   2  -3  -9   76.79    3.30
  -2  -3   9   73.19    4.60
  -2  -3   9   73.29    3.80
  -2  -3   9   65.49    3.20
   2  -3  -9   76.39    2.80
   2  -3  -9   76.39    2.80
   2   3  -8  177.38    6.80
  -2   3   8  174.28    7.30
   2   3  -8  166.38   10.80
   2   3  -8  156.48    7.80
  -2   3   8  179.48    5.40
  -2   3   8  170.08    5.40
  -2   3   8  173.78    6.30
   2   3  -8  179.78    6.10
   2   3  -8  173.48    6.10
  -2  -3   8  171.78    5.70
  -2  -3   8  169.88    6.80
   2  -3  -8  170.28    6.00
  -2  -3   8  189.08    6.20
   2  -3  -8  174.58    5.30
  -2  -3   8  175.38    6.00
   2  -3  -8  181.08    5.40
  -2  -3   8  170.18    8.10
  -2   3   7  128.09    5.80
   2   3  -7  122.39    6.30
  -2   3   7  129.19    4.10
   2   3  -7  137.09    5.40
   2   3  -7  133.19    4.80
  -2   3   7  129.69    5.00
   2   3  -7  130.49    4.70
  -2   3   7  131.29    5.00
  -2   3   7  131.19    4.10
   2   3  -7  125.99    8.60
  -2  -3   7  125.79    5.40
  -2  -3   7  131.29    4.50
  -2  -3   7  136.19    4.80
  -2  -3   7  130.19    4.60
   2  -3  -7  131.49    4.80
   2  -3  -7  128.59    4.00
   2  -3  -7  132.19    4.10
  -2  -3   7  139.09    6.60
  -2   3   6  325.17    9.40
   2   3  -6  328.07   18.30
  -2   3   6  321.87   10.90
  -2   3   6  333.47   12.70
   2   3  -6  320.77   13.30
  -2   3   6  333.87    9.40
   2   3  -6  333.47   11.30
  -2   3   6  333.07   11.00
   2   3  -6  325.87   10.10
   2   3  -6  334.17   10.20
   2  -3  -6  332.57    9.10
   2  -3  -6  325.67    9.30
   2  -3  -6  347.27    9.30
  -2  -3   6  321.37    9.60
  -2  -3   6  332.37   10.10
  -2  -3   6  332.47   10.10
  -2  -3   6  316.17   11.30
  -2  -3   6  329.07   13.40
   2  -3  -6  331.37   10.20
  -2   3   5   20.70    1.80
  -2   3   5   20.30    0.90
  -2   3   5   20.70    1.50
   2   3  -5   20.00    2.80
   2   3  -5   20.80    1.40
  -2   3   5   21.20    1.60
   2   3  -5   18.50    2.00
  -2   3   5   20.10    0.80
   2   3  -5   22.60    1.40
   2   3  -5   21.00    1.70
  -2  -3   5   19.60    1.70
   2  -3  -5   17.70    1.50
  -2  -3   5   18.10    2.10
  -2  -3   5   21.10    1.40
  -2  -3   5   21.00    1.20
  -2  -3   5   17.30    1.30
  -2  -3   5   21.40    1.40
   2   3  -4  280.47    9.40
  -2   3   4  272.27   10.70
   2   3  -4  263.97   15.20
   2   3  -4  260.47   11.10
   2   3  -4  272.77    8.30
   2   3  -4  266.87    8.20
  -2   3   4  270.37    9.20
  -2   3   4  255.87    9.10
  -2  -3   4  276.57    8.10
  -2  -3   4  263.87    8.20
  -2  -3   4  272.67    9.40
  -2  -3   4  268.17    7.80
   2  -3  -4  269.57    8.50
  -2  -3   4  267.67   11.20
  -2  -3   4  272.27    8.20
  -2   3   3  234.38    8.10
   2   3  -3  232.28    7.10
   2   3  -3  239.98    7.30
  -2   3   3  225.48    9.40
   2   3  -3  237.28    7.20
   2   3  -3  223.88   13.40
   2   3  -3  223.48    9.80
   2   3  -3  236.08    8.20
  -2  -3   3  237.18    6.90
  -2  -3   3  236.58    7.10
  -2  -3   3  220.68    7.10
   2  -3  -3  230.98    7.50
   2  -3  -3  233.88    9.50
  -2  -3   3  223.38    8.20
  -2  -3   3  230.68    6.70
  -2  -3   3  236.58    7.10
  -2  -3   3  237.88    9.90
  -2   3   2  199.38   11.60
  -2   3   2  214.98    7.30
  -2   3   2  195.78    8.40
   2   3  -2  190.28    8.60
   2   3  -2  203.28    6.10
   2   3  -2  198.78   11.90
   2   3  -2  207.08    6.20
   2   3  -2  206.98    6.30
   2   3  -2  205.78    7.20
   2  -3  -2  194.68    7.10
  -2  -3   2  199.18    6.10
  -2  -3   2  195.18    6.10
  -2  -3   2  209.28    8.80
   2  -3  -2  198.28    8.40
  -2  -3   2  195.48    7.20
   2  -3  -2  204.48    6.60
  -2  -3   2  198.98    5.80
   2   3  -1  111.49    3.50
  -2   3   1  120.09    4.60
   2   3  -1  107.89    5.40
  -2   3   1  106.99    7.10
  -2   3   1  109.39    5.20
   2   3  -1  114.49    3.60
   2   3  -1  110.39    4.40
   2   3  -1  112.19    3.70
   2   3  -1  102.59    7.30
  -2  -3   1  110.29    4.40
   2  -3  -1  111.99    4.10
   2  -3  -1  109.09    4.40
  -2  -3   1  105.39    3.50
  -2  -3   1  115.39    3.80
  -2  -3   1  114.49    3.50
   2  -3  -1  103.79    5.20
   2   3   0  257.87    7.30
   2   3   0  243.08   10.30
   2   3   0  255.37    7.60
  -2   3   0  242.88   14.00
   2   3   0  259.17    7.40
  -2   3   0  254.07    7.10
  -2   3   0  257.37    8.80
   2   3   0  252.57    8.50
   2   3   0  244.28   14.30
  -2   3   0  241.88   10.20
  -2   3   0  248.98    7.10
  -2  -3   0  244.48    7.30
  -2  -3   0  252.47    7.30
  -2  -3   0  256.07    7.70
   2  -3   0  254.77   10.30
   2  -3   0  253.27    8.00
   2  -3   0  239.48    8.70
  -2  -3   0  255.17    8.60
  -2   3  -1  116.39    4.60
   2   3   1  112.29    3.50
   2   3   1  111.49    3.50
  -2   3  -1  111.79    3.40
  -2   3  -1  107.89    5.30
   2   3   1  112.09    3.50
   2   3   1  113.69    4.30
   2   3   1  110.29    3.50
  -2   3  -1  108.99    7.20
  -2   3  -1  111.39    3.40
   2   3   1  104.39    5.30
  -2  -3  -1  116.39    3.80
   2  -3   1  116.29    3.40
  -2  -3  -1  108.99    3.40
  -2  -3  -1  112.69    3.40
   2  -3   1  109.69    3.30
   2  -3   1  104.49    4.50
   2  -3   1  116.19    5.50
  -2  -3  -1  107.79    4.30
  -2   3  -2  190.48   11.60
  -2   3  -2  201.28    7.30
  -2   3  -2  203.38    6.00
   2   3   2  206.68    5.90
   2   3   2  194.48    8.50
  -2   3  -2  204.08    6.00
   2   3   2  201.78    7.00
   2   3   2  203.08    5.90
  -2   3  -2  199.48    8.60
   2  -3   2  193.08    7.30
   2  -3   2  200.08    8.70
  -2  -3  -2  201.98    5.80
  -2  -3  -2  210.08    6.30
   2  -3   2  196.88    5.90
  -2  -3  -2  197.78    6.90
   2  -3   2  200.38    6.00
  -2  -3  -2  209.58    5.80
  -2   3  -3  227.38    6.90
  -2   3  -3  224.18    6.90
   2   3   3  235.38    6.70
  -2   3  -3  229.78   13.10
   2   3   3  219.78    9.50
   2   3   3  235.88    6.70
  -2   3  -3  221.88    9.60
  -2   3  -3  236.08    8.30
   2   3   3  225.18    7.80
   2  -3   3  228.88    9.80
   2  -3   3  226.28    8.20
  -2  -3  -3  240.48    6.70
  -2  -3  -3  229.78    7.70
  -2  -3  -3  239.78    7.20
   2  -3   3  228.88    6.80
  -2  -3  -3  226.18    6.60
   2  -3   3  229.68    6.60
   2  -3   3  233.08    6.90
  -2   3  -4  273.77    8.10
  -2   3  -4  268.67   15.00
  -2   3  -4  252.27   10.90
   2   3   4  266.87    7.70
   2   3   4  268.17    8.80
  -2   3  -4  268.97    9.40
   2   3   4  268.47    7.80
  -2   3  -4  263.57    8.10
   2   3   4  264.07   10.80
  -2  -3  -4  278.97    7.70
  -2  -3  -4  272.57    8.20
   2  -3   4  267.67    8.00
   2  -3   4  273.27    8.10
   2  -3   4  268.07    7.70
  -2  -3  -4  263.47    7.50
  -2  -3  -4  265.57    7.70
   2  -3   4  260.07   11.10
   2  -3   4  261.17    9.40
   2   3   5   19.30    1.00
  -2   3  -5   19.10    1.70
  -2   3  -5   20.20    1.30
  -2   3  -5   20.40    2.00
   2   3   5   21.40    1.90
   2   3   5   20.40    1.40
  -2   3  -5   19.80    1.30
  -2   3  -5   23.70    2.90
   2   3   5   20.70    1.10
  -2  -3  -5   19.40    1.40
   2  -3   5   19.30    1.00
  -2  -3  -5   19.80    1.00
  -2  -3  -5   21.90    1.00
   2  -3   5   16.70    1.20
   2  -3   5   18.30    2.10
   2  -3   5   22.20    1.40
  -2  -3  -5   21.90    1.10
   2  -3   5   21.00    1.40
   2  -3   5   19.70    1.80
  -2   3  -6  323.57   18.20
   2   3   6  328.97   10.70
  -2   3  -6  334.77   10.10
   2   3   6  333.67    9.60
  -2   3  -6  343.77   11.50
   2   3   6  331.57   10.70
  -2   3  -6  329.77   10.10
  -2   3  -6  322.17   13.30
   2   3   6  334.27    9.60
   2  -3   6  332.97   13.50
  -2  -3  -6  339.07   10.10
  -2  -3  -6  324.27    9.30
   2  -3   6  344.37   10.20
   2  -3   6  342.17   10.10
   2  -3   6  312.67   11.40
   2  -3   6  315.07    9.60
  -2  -3  -6  332.37    9.60
  -2  -3  -6  333.87    9.60
  -2   3  -7  130.69    8.50
   2   3   7  131.59    4.70
   2   3   7  132.09    4.20
   2   3   7  129.29    4.20
  -2   3  -7  131.89    4.60
   2   3   7  128.19    4.60
  -2   3  -7  133.79    5.40
  -2   3  -7  116.99    6.20
  -2   3  -7  133.59    4.70
   2  -3   7  131.29    4.70
   2  -3   7  117.09    5.30
   2  -3   7  123.59    4.40
  -2  -3  -7  131.19    4.20
   2  -3   7  132.79    6.50
  -2  -3  -7  134.59    4.60
  -2  -3  -7  131.39    4.10
  -2   3  -8  165.68    7.90
  -2   3  -8  177.48    6.00
   2   3   8  174.18    6.00
   2   3   8  180.08    6.10
   2   3   8  183.08    5.60
  -2   3  -8  173.18    6.00
   2   3   8  171.18    5.60
  -2   3  -8  178.38   10.90
  -2  -3  -8  168.78    5.40
   2  -3   8  176.38    5.70
   2  -3   8  186.08    6.10
  -2  -3  -8  181.48    5.60
   2  -3   8  166.48    6.90
   2   3   9   74.79    3.00
   2   3   9   80.89    3.00
  -2   3  -9   79.29    6.10
  -2   3  -9   73.09    3.30
  -2   3  -9   79.99    3.40
   2   3   9   78.59    3.10
   2   3   9   76.29    3.10
  -2   3  -9   72.09    4.40
   2   3   9   77.09    3.80
  -2  -3  -9   80.99    2.90
   2  -3   9   79.69    4.80
   2  -3   9   78.99    3.50
   2  -3   9   76.99    4.00
   2  -3   9   76.49    3.20
  -2  -3  -9   77.39    3.00
   2   3  10    7.60    0.90
  -2   3 -10    4.90    1.40
   2   3  10    8.50    0.90
  -2   3 -10    7.80    1.20
   2   3  10    7.10    1.20
   2   3  10    6.60    0.90
  -2   3 -10    7.70    2.20
  -2   3 -10    7.50    1.10
   2   3  10    6.40    0.90
   2  -3  10    8.60    1.50
  -2  -3 -10    7.50    1.00
  -2  -3 -10    7.10    0.90
   2  -3  10    5.10    1.00
   2  -3  10    7.60    1.70
   2  -3  10    5.50    1.10
   2   3  11  508.45   18.40
  -2   3 -11  480.15   15.20
   2   3  11  494.85   14.70
  -2   3 -11  487.45   15.10
  -2   3 -11  485.25   26.90
  -2   3 -11  475.35   19.20
   2   3  11  516.05   14.70
   2   3  11  502.85   15.60
  -2  -3 -11  488.05   14.20
   2  -3  11  493.75   19.70
   2  -3  11  484.85   16.80
  -2  -3 -11  522.45   14.70
   2  -3  11  507.55   14.60
  -2   3 -12   19.20    3.50
   2   3  12   21.90    1.60
   2   3  12   21.00    1.40
   2   3  12   21.20    1.80
   2   3  12   19.20    1.50
  -2   3 -12   18.90    1.60
  -2   3 -12   20.50    1.80
  -2  -3 -12   22.20    1.60
   2  -3  12   22.30    2.80
   2  -3  12   19.30    2.20
  -2  -3 -12   21.50    1.60
   2  -3  12   20.30    1.80
  -2   3 -13  471.95   15.00
  -2   3 -13  453.65   26.00
  -2   3 -13  444.06   14.50
   2   3  13  474.45   17.50
   2   3  13  459.05   14.10
   2   3  13  470.85   14.90
   2  -3  13  464.55   16.20
  -2  -3 -13  495.75   15.00
   2  -3  13  462.25   13.90
   2  -3  13  470.45   18.90
  -2  -3 -13  456.45   13.60
   2   3  14   14.00    1.50
   2   3  14   18.00    1.80
   2   3  14   15.10    1.30
  -2   3 -14   15.40    1.80
  -2   3 -14   16.90    1.80
  -2   3 -14   16.10    3.50
   2  -3  14   16.40    1.80
   2  -3  14   17.00    2.20
  -2  -3 -14   16.50    1.60
  -2   3 -15  230.58   15.90
  -2   3 -15  258.27    9.10
   2   3  15  236.58    8.30
   2   3  15  254.07   10.30
  -2   3 -15  243.68    8.80
   2  -3  15  256.07    8.40
   2  -3  15  249.88    9.80
  -2  -3 -15  251.77    8.10
  -2   3 -16  120.19    5.20
  -2   3 -16  114.29    9.60
   2   3  16  115.29    4.80
  -2   3 -16  117.29    5.30
   2  -3  16  118.89    4.90
  -2  -3 -16  123.19    4.70
  -2  -3 -16  110.99    8.40
  -2   3 -17  225.88    8.50
  -2   3 -17  187.78   14.60
  -2   3 -17  212.88    8.10
   2   3  17  218.98    7.70
  -2  -3 -17  204.68   13.40
   2  -3  17  225.68    7.80
  -2  -3 -17  229.88    7.50
  -2   3 -18  134.99    6.00
  -2   3 -18  135.79    5.90
  -2   3 -18  113.59   10.50
  -2  -3 -18  128.29    5.20
  -2  -3 -18  127.59    9.40
   2  -3  18  133.49    5.50
  -2   3 -19   84.69    4.40
  -2   3 -19   70.49    4.20
  -2   3 -19   56.39    7.20
  -2  -3 -19   67.59    6.40
   2  -3  19   71.59    3.90
  -2  -3 -19   71.29    3.70
  -2   3 -20  168.58    7.20
  -2   3 -20  130.79   12.40
  -2   3 -20  173.08    7.10
  -2  -3 -20  156.98   11.30
  -2  -3 -20  168.98    6.40
   2  -3  20  177.68    6.70
  -2   3 -21  329.77   11.50
  -2   3 -21  299.97   11.70
  -2  -3 -21  299.07   18.90
   2  -3  21  328.07   10.80
  -2  -3 -21  310.87   10.50
  -2   3 -22   78.29    4.80
  -2  -3 -22   84.89    7.70
  -2  -3 -22   83.49    4.30
   2  -3  22   88.89    4.60
  -2   3 -23   60.29    4.20
  -2  -3 -23   70.99    4.00
  -2  -3 -23   63.69    6.60
  -2   3 -24   71.39    4.60
  -2  -3 -24   73.49    4.30
  -2  -3 -24   70.29    7.30
  -2   3 -25   43.60    3.60
  -2  -3 -25   43.80    3.30
  -2   3 -26   16.60    2.60
  -2  -3 -26   17.40    2.40
  -2   3 -27   33.10    3.50
  -2  -3 -27   34.70    3.40
  -2   3 -28    1.30    1.80
  -2  -3 -28    4.20    1.70
  -2   3 -29   49.99    4.20
  -2  -3 -29   54.49    4.00
  -2   3 -30    1.00    2.10
  -2  -3 -30    3.80    1.90
  -2   3 -31   11.30    3.00
  -2  -3 -31   17.10    2.80
   2   3  32    5.50    1.90
  -2   3 -32    3.90    2.80
  -2  -3 -32    4.40    2.10
  -2   3 -33    0.90    2.80
   2   3  33    2.30    1.70
  -2  -3 -33    1.50    1.80
   2   3  34    0.10    1.50
  -2   3 -34   -4.10    2.90
  -2  -3 -34    0.10    1.90
   2   4 -33   42.60    4.90
   2   4 -32   -2.20    2.40
   2  -4 -32    4.10    2.00
   2   4 -31   52.59    4.90
   2  -4 -31   62.09    4.40
   2   4 -30    5.80    2.50
   2  -4 -30    9.00    2.30
   2   4 -29   51.39    4.60
   2  -4 -29   59.69    4.20
   2   4 -28    2.60    2.00
   2  -4 -28    7.20    2.00
   2   4 -27   97.69    6.10
   2  -4 -27  119.69    5.80
   2   4 -26    8.00    2.30
   2  -4 -26    6.00    1.80
   2   4 -25   61.89    4.50
   2  -4 -25   61.79    4.00
   2   4 -24   24.70    3.10
  -2  -4  24   29.40    3.10
   2  -4 -24   27.00    2.80
   2   4 -23   31.80    3.40
   2  -4 -23   28.40    2.80
  -2  -4  23   35.10    3.00
   2   4 -22   10.30    2.20
  -2  -4  22   10.80    2.00
   2  -4 -22   11.80    2.00
   2   4 -21    3.90    1.80
   2  -4 -21    3.00    1.50
  -2  -4  21    5.70    1.80
   2   4 -20   47.90    3.70
   2  -4 -20   48.00    3.10
  -2  -4  20   45.10    3.40
   2   4 -19   22.40    2.60
   2  -4 -19   20.50    2.20
  -2  -4  19   19.30    2.30
   2   4 -18   37.30    3.00
   2   4 -18   33.80    5.10
   2  -4 -18   34.90    2.60
  -2  -4  18   37.30    2.90
   2   4 -17   13.10    1.90
   2   4 -17   10.20    3.30
  -2  -4  17   13.50    2.00
   2  -4 -17   11.30    1.60
   2   4 -16   41.60    2.80
   2   4 -16   44.90    5.30
  -2  -4  16   36.30    2.70
   2  -4 -16   41.10    2.50
   2   4 -15   68.79    6.70
  -2  -4  15   63.99    3.50
   2  -4 -15   69.99    3.20
   2   4 -14   22.10    4.00
   2   4 -14   24.50    2.20
  -2  -4  14   24.40    2.10
   2  -4 -14   23.70    1.80
  -2   4  13   34.10    2.30
  -2   4  13   33.10    2.00
   2   4 -13   32.00    2.40
   2   4 -13   30.00    4.20
   2  -4 -13   30.40    1.90
  -2  -4  13   32.40    2.30
  -2  -4  13   32.40    2.30
  -2   4  12   35.20    1.90
   2   4 -12   39.20    4.70
  -2   4  12   34.40    2.30
  -2   4  12   43.40    2.50
   2   4 -12   33.30    2.40
  -2  -4  12   40.90    2.50
   2  -4 -12   35.50    2.00
  -2  -4  12   39.60    2.40
   2  -4 -12   38.00    2.60
   2   4 -11  161.08    6.10
  -2   4  11  158.38    6.30
  -2   4  11  168.98    5.30
  -2   4  11  153.18    5.30
  -2   4  11  158.88    6.20
   2   4 -11  161.68   11.10
   2  -4 -11  167.58    6.20
  -2  -4  11  167.48    5.90
   2  -4 -11  163.88    5.30
  -2  -4  11  161.58    7.10
  -2  -4  11  161.88    5.90
   2   4 -10   96.09    7.90
  -2   4  10  110.39    3.70
   2   4 -10  105.19    4.40
  -2   4  10  105.69    3.70
  -2   4  10  106.99    4.60
  -2   4  10  106.29    5.30
  -2   4  10  108.09    4.60
  -2  -4  10  110.99    4.20
  -2  -4  10  104.29    4.20
   2  -4 -10  106.29    4.50
   2  -4 -10  103.39    3.60
   2  -4 -10  109.99    3.50
  -2  -4  10   97.09    5.10
  -2   4   9  139.69    5.60
  -2   4   9  141.89    6.60
  -2   4   9  138.69    5.70
  -2   4   9  144.89    4.60
  -2   4   9  145.49    4.50
   2   4  -9  138.69    5.30
   2   4  -9  130.09    9.70
  -2  -4   9  137.39    6.20
  -2  -4   9  151.38    5.20
   2  -4  -9  145.49    5.40
  -2  -4   9  145.29    5.10
   2  -4  -9  144.69    4.50
  -2   4   8  144.79    4.40
   2   4  -8  139.49    9.90
  -2   4   8  149.49    6.80
  -2   4   8  143.19    5.70
  -2   4   8  142.09    5.70
  -2   4   8  147.69    4.50
   2   4  -8  143.79    5.30
  -2  -4   8  145.79    6.30
   2  -4  -8  145.69    5.50
   2  -4  -8  143.59    4.40
  -2  -4   8  146.49    5.10
  -2  -4   8  146.29    5.00
   2   4  -7  218.68   14.20
  -2   4   7  239.08    8.50
  -2   4   7  226.88    6.70
   2   4  -7  231.78    7.60
  -2   4   7  230.88    9.90
   2   4  -7  249.97    7.80
  -2   4   7  236.28    8.40
  -2  -4   7  235.68    7.40
  -2  -4   7  229.98    8.90
   2  -4  -7  234.98    7.90
   2  -4  -7  233.48    6.60
  -2  -4   7  228.28   10.60
  -2  -4   7  233.88    7.30
  -2   4   6  198.58    7.60
   2   4  -6  200.78    6.70
  -2   4   6  208.28    7.60
   2   4  -6  189.58   12.70
  -2   4   6  211.08    9.00
   2   4  -6  212.68    6.90
   2  -4  -6  209.38    5.80
  -2  -4   6  208.38    6.40
   2  -4  -6  207.68    7.10
  -2  -4   6  212.28    6.80
  -2  -4   6  205.58    9.70
  -2  -4   6  206.28    6.50
  -2  -4   6  199.48    8.00
  -2   4   5  384.56   12.90
   2   4  -5  360.86   21.30
  -2   4   5  380.56   12.90
   2   4  -5  401.96   11.60
   2   4  -5  375.26   11.40
  -2   4   5  373.76   15.10
  -2  -4   5  378.66   11.10
   2  -4  -5  389.26   12.00
  -2  -4   5  387.76   11.40
  -2  -4   5  376.56   11.40
  -2  -4   5  398.86   15.90
  -2  -4   5  375.66   13.20
  -2   4   4  113.29    4.70
   2   4  -4  102.49    5.90
   2   4  -4  110.99    4.00
   2   4  -4  106.59    3.80
  -2   4   4  110.69    5.60
   2   4  -4   98.99    7.80
  -2  -4   4  121.49    6.30
  -2  -4   4  108.49    4.90
  -2  -4   4  104.39    3.80
   2  -4  -4  101.99    4.30
  -2  -4   4  106.59    3.70
   2   4  -3  152.98   10.30
   2   4  -3  157.68    6.20
   2   4  -3  146.19    5.00
  -2   4   3  161.08    6.20
  -2   4   3  153.88    7.30
  -2   4   3  152.78   10.00
   2   4  -3  158.78    5.10
   2   4  -3  154.48    7.60
  -2  -4   3  153.88    5.00
  -2  -4   3  150.28    4.80
   2  -4  -3  156.18    5.60
  -2  -4   3  155.38    6.20
   2  -4  -3  158.88    7.30
  -2  -4   3  149.69    7.60
   2   4  -2   30.40    3.90
   2   4  -2   34.80    1.70
   2   4  -2   33.10    3.00
  -2   4   2   30.60    3.80
  -2   4   2   34.00    2.90
  -2   4   2   36.40    2.40
   2   4  -2   36.90    1.70
   2   4  -2   37.70    2.50
  -2  -4   2   33.90    2.00
  -2  -4   2   34.20    2.30
   2  -4  -2   34.70    2.90
  -2  -4   2   36.00    1.60
  -2  -4   2   35.40    1.60
  -2  -4   2   34.40    3.10
   2  -4  -2   35.20    2.30
   2  -4  -2   34.70    2.20
   2   4  -1  271.77   11.80
   2   4  -1  280.77    9.70
  -2   4   1  280.97   11.70
   2   4  -1  276.17    8.20
  -2   4   1  295.77   10.00
   2   4  -1  288.37    8.30
  -2   4   1  262.67   15.80
   2   4  -1  251.77   16.10
   2  -4  -1  280.47   11.70
  -2  -4   1  272.37    9.80
  -2  -4   1  268.57    7.90
  -2  -4   1  284.67    8.10
   2  -4  -1  276.67    9.80
  -2  -4   1  280.97    8.70
   2  -4  -1  272.67    9.00
   2   4   0  242.78    7.20
  -2   4   0  248.38    8.90
   2   4   0  226.68   14.50
  -2   4   0  233.38   14.20
   2   4   0  254.57    7.30
   2   4   0  249.18    8.70
  -2   4   0  238.98   10.50
   2   4   0  239.68   10.60
  -2  -4   0  249.18    7.80
   2  -4   0  246.28    8.10
   2  -4   0  240.68    8.80
  -2  -4   0  235.18    6.90
   2  -4   0  238.08    6.70
  -2  -4   0  248.48    7.10
   2  -4   0  256.07   10.60
  -2  -4   0  236.38    8.70
   2   4   1  287.87    8.00
   2   4   1  277.47   11.70
  -2   4  -1  272.37    7.90
  -2   4  -1  270.27   11.60
  -2   4  -1  252.67   15.70
   2   4   1  287.07    8.00
   2   4   1  281.47    9.60
  -2   4  -1  283.47    7.90
   2   4   1  266.97   16.10
   2  -4   1  259.87    9.80
   2  -4   1  274.87   11.70
  -2  -4  -1  270.07    7.70
   2  -4   1  273.37    9.00
  -2  -4  -1  281.67    8.60
   2  -4   1  269.97    7.70
  -2  -4  -1  269.37    9.60
  -2  -4  -1  284.27    7.80
   2   4   2   35.40    1.40
  -2   4  -2   33.90    1.50
  -2   4  -2   33.70    3.90
   2   4   2   36.00    2.30
  -2   4  -2   32.10    2.80
   2   4   2   38.60    1.50
  -2   4  -2   38.10    1.60
   2   4   2   33.90    2.90
  -2  -4  -2   34.90    1.40
   2  -4   2   39.80    3.20
   2  -4   2   34.60    1.40
   2  -4   2   34.60    2.50
   2  -4   2   36.30    1.50
  -2  -4  -2   34.00    2.20
  -2  -4  -2   37.10    2.00
   2  -4   2   36.10    1.40
  -2   4  -3  140.39    9.80
  -2   4  -3  143.89    7.30
   2   4   3  151.88    4.60
  -2   4  -3  162.48    4.90
   2   4   3  156.78    5.90
   2   4   3  153.88    4.60
  -2   4  -3  149.19    4.90
   2   4   3  150.48    7.40
   2   4   3  163.78    4.70
   2  -4   3  162.38    7.70
   2  -4   3  150.58    6.30
  -2  -4  -3  148.79    5.80
   2  -4   3  149.19    4.70
  -2  -4  -3  153.48    5.30
  -2  -4  -3  154.58    4.50
   2  -4   3  157.88    4.80
  -2   4  -4  106.79    5.80
  -2   4  -4  107.59    3.80
   2   4   4  103.89    5.70
   2   4   4  110.59    3.40
   2   4   4  109.09    4.50
  -2   4  -4  105.79    7.80
   2   4   4  109.89    3.40
  -2   4  -4  113.09    3.80
  -2  -4  -4  111.79    4.10
  -2  -4  -4  106.09    4.40
   2  -4   4  109.79    6.00
   2  -4   4  113.09    5.10
   2  -4   4  113.39    3.80
   2  -4   4  103.19    3.60
  -2  -4  -4  106.09    3.30
  -2   4  -5  368.16   21.40
   2   4   5  386.26   11.00
  -2   4  -5  376.76   11.50
  -2   4  -5  392.96   11.50
   2   4   5  401.16   11.10
   2   4   5  382.16   15.50
   2   4   5  374.16   12.70
  -2  -4  -5  392.76   11.80
  -2  -4  -5  384.06   10.70
  -2  -4  -5  397.66   10.90
   2  -4   5  364.26   13.40
   2  -4   5  399.86   16.00
   2  -4   5  385.56   11.10
   2  -4   5  406.56   11.50
  -2   4  -6  205.98    6.80
   2   4   6  207.58    9.30
   2   4   6  215.98    6.30
  -2   4  -6  198.98   12.80
   2   4   6  213.28    6.30
  -2   4  -6  221.28    6.90
   2   4   6  200.68    7.40
   2   4   6  211.78    7.50
  -2  -4  -6  206.58    6.90
  -2  -4  -6  219.78    6.20
   2  -4   6  202.88    8.20
  -2  -4  -6  204.08    6.10
   2  -4   6  202.68    6.50
   2  -4   6  207.98    6.80
   2  -4   6  207.58    9.80
   2   4   7  236.98    7.10
   2   4   7  243.08    8.30
  -2   4  -7  232.58    7.70
   2   4   7  230.18    8.10
   2   4   7  241.58    7.10
  -2   4  -7  223.28   14.10
  -2   4  -7  244.38    7.70
   2   4   7  228.38   10.20
   2  -4   7  239.68    7.20
  -2  -4  -7  225.18    6.90
  -2  -4  -7  244.78    7.80
   2  -4   7  230.58    9.00
   2  -4   7  241.38    7.70
   2  -4   7  236.08   10.90
  -2  -4  -7  244.18    7.00
   2  -4   7  232.38    7.30
   2   4   8  147.29    5.50
   2   4   8  143.99    5.40
   2   4   8  137.29    6.90
   2   4   8  142.29    4.70
  -2   4  -8  142.19    9.80
   2   4   8  146.79    4.70
  -2   4  -8  141.79    5.30
   2  -4   8  140.79    5.00
   2  -4   8  140.39    6.30
  -2  -4  -8  149.69    4.60
  -2  -4  -8  146.29    4.60
  -2  -4  -8  149.99    5.30
   2  -4   8  148.29    4.90
  -2   4  -9  143.09    9.90
   2   4   9  143.79    5.40
   2   4   9  144.29    6.90
   2   4   9  139.29    5.30
   2   4   9  142.39    4.70
  -2   4  -9  140.79    5.30
   2   4   9  146.99    4.70
  -2  -4  -9  137.69    4.60
   2  -4   9  135.39    5.00
   2  -4   9  150.18    5.00
   2  -4   9  147.39    6.40
  -2  -4  -9  147.29    4.70
  -2  -4  -9  145.99    5.30
   2   4  10  106.19    3.80
  -2   4 -10  105.19    4.40
   2   4  10  111.79    3.80
   2   4  10  106.19    4.20
   2   4  10  101.49    5.50
  -2   4 -10  107.49    8.20
   2  -4  10  104.09    5.30
  -2  -4 -10   98.59    3.70
   2  -4  10  108.49    4.10
   2  -4  10  106.29    4.20
  -2  -4 -10  110.79    3.80
   2   4  11  167.68    7.20
  -2   4 -11  151.38    6.00
   2   4  11  158.28    5.40
   2   4  11  168.48    7.60
  -2   4 -11  165.68   11.00
   2  -4  11  166.28    5.80
   2  -4  11  160.88    5.80
  -2  -4 -11  155.58    5.30
   2  -4  11  152.18    7.00
   2   4  12   38.70    2.70
  -2   4 -12   39.70    4.70
   2   4  12   40.00    3.00
   2   4  12   37.50    2.10
  -2   4 -12   40.30    2.60
  -2  -4 -12   38.10    2.10
   2  -4  12   39.00    2.40
  -2   4 -13   33.90    2.40
  -2   4 -13   34.50    4.50
   2   4  13   33.60    2.50
   2   4  13   36.20    2.10
   2  -4  13   28.90    2.30
  -2  -4 -13   31.30    2.00
  -2   4 -14   23.40    2.30
  -2   4 -14   25.60    4.10
   2  -4  14   22.60    2.10
  -2  -4 -14   24.70    1.90
  -2   4 -15   68.69    6.80
   2  -4  15   66.19    3.50
  -2  -4 -15   64.29    3.10
  -2   4 -16   40.60    5.40
  -2  -4 -16   42.00    2.50
   2  -4  16   41.40    2.80
  -2   4 -17   13.10    1.90
  -2   4 -17   12.70    3.70
   2  -4  17    9.60    1.70
  -2  -4 -17   11.00    1.50
  -2   4 -18   34.80    6.00
  -2   4 -18   37.30    3.10
   2  -4  18   37.00    2.80
  -2  -4 -18   39.50    2.70
  -2   4 -19   18.60    2.50
  -2  -4 -19   18.70    2.10
   2  -4  19   19.80    2.30
  -2   4 -20   50.19    3.70
   2  -4  20   50.89    3.50
  -2  -4 -20   47.30    3.20
  -2   4 -21    5.40    1.80
  -2  -4 -21    5.50    1.60
   2  -4  21    5.50    1.70
  -2   4 -22   12.10    2.30
   2  -4  22   12.90    2.20
  -2  -4 -22    9.40    1.80
  -2   4 -23   26.10    3.10
  -2  -4 -23   27.20    2.80
   2  -4  23   31.50    3.10
  -2   4 -24   24.40    3.10
  -2  -4 -24   20.70    2.50
   2  -4  24   23.60    2.90
  -2   4 -25   56.99    4.20
  -2  -4 -25   56.39    3.80
  -2   4 -26    5.20    1.90
  -2  -4 -26    5.10    1.70
  -2   4 -27   90.59    5.70
  -2  -4 -27  105.79    5.40
  -2   4 -28    3.20    2.00
  -2  -4 -28   10.80    2.30
  -2   4 -29   49.60    4.50
  -2  -4 -29   64.79    4.40
  -2   4 -30    6.50    2.50
  -2  -4 -30    8.40    2.10
  -2   4 -31   55.99    4.90
  -2  -4 -31   66.99    4.70
  -2   4 -32    1.40    2.50
  -2  -4 -32    4.60    2.00
  -2   4 -33   39.30    4.60
   2   5 -31    1.60    2.20
   2   5 -30    2.70    2.30
   2  -5 -30    2.70    1.80
   2   5 -29    0.20    1.80
   2  -5 -29   -2.10    1.40
   2   5 -28   -0.10    1.80
   2  -5 -28    4.40    1.70
   2   5 -27    6.80    2.30
   2  -5 -27    3.20    1.70
   2   5 -26    7.50    2.30
   2  -5 -26    6.10    1.90
   2   5 -25   40.40    3.90
   2  -5 -25   34.90    3.10
  -2  -5  25   37.60    3.70
   2   5 -24    8.10    2.20
  -2  -5  24    6.30    2.00
   2  -5 -24    5.80    1.70
   2   5 -23   29.30    3.40
   2  -5 -23   31.40    2.80
  -2  -5  23   31.70    3.30
   2   5 -22    9.70    2.20
   2  -5 -22    7.10    1.60
  -2  -5  22    6.30    1.70
   2   5 -21   21.10    2.70
   2  -5 -21   18.80    2.20
  -2  -5  21   16.30    2.40
  -2  -5  20    9.60    1.90
   2  -5 -20    7.20    1.60
   2  -5 -19   50.99    3.20
  -2  -5  19   61.09    3.70
   2  -5 -18   38.10    2.70
  -2  -5  18   36.20    3.00
   2  -5 -17  187.88    6.60
  -2  -5  17  175.88    7.10
  -2  -5  16   26.30    2.70
   2  -5 -16   25.50    2.20
  -2  -5  15  232.08    8.30
   2  -5 -15  227.08    7.60
   2   5 -14    2.90    2.40
   2  -5 -14    3.10    1.10
  -2  -5  14    2.70    1.40
   2   5 -13  111.49    9.10
  -2  -5  13  106.69    4.70
   2  -5 -13  102.99    4.90
   2  -5 -13  109.39    4.10
   2   5 -12   14.20    3.40
   2  -5 -12   14.10    1.90
   2  -5 -12   10.60    1.20
  -2  -5  12   14.00    1.70
   2   5 -11   59.79    6.30
  -2  -5  11   61.99    3.30
   2  -5 -11   64.79    2.70
   2  -5 -11   65.49    3.50
   2   5 -10   22.00    4.10
  -2   5  10   20.30    1.10
  -2   5  10   20.50    1.10
  -2  -5  10   17.10    1.80
   2  -5 -10   21.40    2.20
   2  -5 -10   20.60    1.50
  -2   5   9  175.48    6.80
   2   5  -9  163.68   11.90
   2  -5  -9  172.48    6.50
   2  -5  -9  168.18    5.20
  -2  -5   9  170.68    5.50
  -2  -5   9  168.68    6.00
  -2   5   8   18.30    2.10
   2   5  -8   16.20    3.60
  -2   5   8   16.70    2.50
   2  -5  -8   14.80    1.10
   2  -5  -8   13.10    1.00
  -2  -5   8   13.50    1.60
   2  -5  -8   15.20    1.80
  -2   5   7  172.28    8.10
   2   5  -7  159.18   11.60
  -2   5   7  171.18    6.80
   2  -5  -7  166.78    4.90
   2  -5  -7  169.48    6.30
  -2  -5   7  168.58    7.30
  -2  -5   7  167.98    5.80
   2   5  -6   34.60    2.00
  -2   5   6   31.50    2.50
   2   5  -6   32.90    4.60
  -2  -5   6   34.90    2.10
   2  -5  -6   33.80    2.50
  -2  -5   6   35.00    2.90
  -2   5   5   33.90    2.60
   2   5  -5   32.20    4.50
   2   5  -5   27.30    1.80
  -2   5   5   34.10    4.10
  -2  -5   5   24.60    1.80
  -2  -5   5   31.70    2.60
   2  -5  -5   32.80    2.30
   2   5  -4   26.50    4.00
  -2   5   4   25.20    3.80
   2   5  -4   27.80    1.60
  -2  -5   4   26.40    2.40
   2  -5  -4   25.40    2.10
  -2  -5   4   26.40    1.70
   2   5  -3   13.80    1.20
   2   5  -3   16.20    3.40
   2   5  -3   14.80    1.20
  -2   5   3   13.00    3.00
  -2  -5   3   15.10    2.00
  -2  -5   3   14.60    1.30
  -2  -5   3   16.60    1.70
   2  -5  -3   14.20    1.70
  -2   5   2    3.90    2.20
   2   5  -2    4.50    0.70
   2   5  -2    5.50    2.30
   2   5  -2    6.50    0.90
   2  -5  -2    4.60    1.20
  -2  -5   2    4.30    1.20
  -2  -5   2    5.70    1.20
   2  -5  -2    9.00    1.50
  -2  -5   2    5.70    0.80
   2   5  -1   75.09    2.80
   2   5  -1   74.39    2.60
  -2   5   1   73.89    6.50
   2   5  -1   69.39    6.60
   2  -5  -1   73.49    3.60
  -2  -5   1   72.69    3.90
  -2  -5   1   69.99    2.70
  -2  -5   1   77.49    3.40
   2  -5  -1   77.79    4.00
   2   5   0   12.90    3.10
  -2   5   0    9.50    2.70
   2   5   0   12.80    0.90
   2   5   0   12.50    1.00
  -2  -5   0    9.30    1.50
   2  -5   0    9.40    1.50
   2  -5   0   11.30    1.70
  -2  -5   0   11.10    1.40
  -2  -5   0   11.60    1.00
   2  -5   0    9.60    0.80
   2  -5   0   10.10    0.80
   2   5   1   72.89    2.40
   2   5   1   70.09    6.60
   2   5   1   75.59    2.50
  -2   5  -1   67.19    6.20
  -2  -5  -1   77.09    3.30
   2  -5   1   73.89    4.00
   2  -5   1   66.79    3.50
  -2  -5  -1   72.29    3.70
   2  -5   1   69.69    2.50
  -2  -5  -1   68.89    2.50
   2   5   2    4.60    0.50
  -2   5  -2    5.30    2.30
   2   5   2    4.70    0.60
  -2   5  -2    4.20    0.60
  -2   5  -2    4.70    0.60
   2   5   2    3.30    2.00
   2  -5   2    5.20    0.70
  -2  -5  -2    4.90    1.20
   2  -5   2    6.20    1.30
   2  -5   2    4.40    1.40
  -2  -5  -2    4.90    0.70
  -2  -5  -2    4.60    0.60
  -2  -5  -2    5.20    1.10
  -2   5  -3   15.80    1.00
   2   5   3   15.40    3.30
  -2   5  -3   15.50    1.10
  -2   5  -3   16.30    3.30
   2  -5   3   16.80    1.20
  -2  -5  -3   17.50    1.90
  -2  -5  -3   13.00    1.00
  -2  -5  -3   15.40    1.00
   2  -5   3   13.20    1.70
   2  -5   3   14.30    2.00
  -2  -5  -3   15.20    1.60
  -2   5  -4   29.80    4.00
  -2   5  -4   31.00    1.60
   2   5   4   29.80    2.30
  -2   5  -4   28.90    1.50
  -2  -5  -4   28.50    1.30
   2  -5   4   27.60    2.60
   2  -5   4   27.60    1.70
  -2  -5  -4   27.80    1.90
  -2  -5  -4   30.10    1.40
  -2   5  -5   33.20    1.80
  -2   5  -5   29.50    4.10
   2  -5   5   31.20    1.80
   2  -5   5   32.90    2.80
  -2  -5  -5   30.10    1.40
  -2  -5  -5   33.40    1.50
  -2  -5  -5   34.10    2.20
  -2   5  -6   33.30    1.90
  -2   5  -6   33.20    4.40
   2  -5   6   35.90    2.00
   2  -5   6   30.00    2.80
  -2  -5  -6   36.90    1.60
  -2  -5  -6   38.70    2.30
   2   5   7  175.08    5.20
   2   5   7  171.18    5.20
  -2   5  -7  170.58   11.70
  -2   5  -7  174.48    6.00
  -2  -5  -7  171.08    5.20
  -2  -5  -7  175.18    6.20
   2  -5   7  167.08    5.80
   2   5   8   17.70    1.10
   2   5   8   15.60    1.10
  -2   5  -8   20.50    3.90
  -2  -5  -8   15.10    1.30
  -2  -5  -8   17.70    1.80
   2  -5   8   16.40    1.70
   2   5   9  167.68    5.30
  -2   5  -9  169.48   11.70
  -2  -5  -9  170.68    6.20
   2  -5   9  169.78    5.90
  -2  -5  -9  163.28    5.30
  -2   5 -10   20.40    4.00
   2  -5  10   19.40    1.30
   2  -5  10   20.80    1.90
  -2  -5 -10   17.40    1.50
  -2   5 -11   71.49    6.60
   2  -5  11   62.79    3.30
  -2  -5 -11   56.99    2.70
  -2   5 -12   16.10    3.70
   2  -5  12   11.80    1.70
  -2  -5 -12   11.10    1.30
  -2   5 -13  114.39    9.20
  -2  -5 -13  107.19    4.20
   2  -5  13  102.39    4.60
  -2   5 -14    2.90    2.50
  -2  -5 -14    1.30    1.10
   2  -5  14    4.40    1.30
  -2  -5 -15  228.98    7.60
   2  -5  15  230.98    8.20
   2  -5  16   23.70    2.50
  -2  -5 -16   24.90    2.20
   2  -5  17  186.08    7.40
  -2  -5 -17  197.68    6.90
   2  -5  18   37.30    3.00
  -2  -5 -18   33.70    2.60
   2  -5  19   52.99    3.50
  -2  -5 -19   54.99    3.20
   2  -5  20    8.50    1.90
  -2  -5 -20    6.00    1.50
  -2  -5 -21   20.80    2.40
   2  -5  21   16.80    2.50
  -2   5 -22    8.10    2.00
   2  -5  22    9.80    2.10
  -2  -5 -22    7.50    1.70
  -2   5 -23   26.50    3.30
  -2  -5 -23   30.60    3.00
   2  -5  23   31.50    3.30
  -2   5 -24    9.60    2.40
  -2  -5 -24    4.60    1.60
   2  -5  24    3.70    1.80
  -2   5 -25   36.30    3.90
  -2  -5 -25   36.00    3.30
   2  -5  25   32.20    3.50
  -2   5 -26    6.20    2.10
  -2  -5 -26    3.80    1.70
   2  -5  26    4.50    2.00
  -2   5 -27    5.10    2.20
  -2  -5 -27    5.20    1.80
  -2   5 -28    2.00    1.90
  -2  -5 -28    2.50    1.80
  -2   5 -29   -0.50    1.80
  -2  -5 -29   -0.60    1.50
  -2   5 -30    2.00    2.10
  -2  -5 -30    5.60    2.00
  -2   5 -31    1.90    2.30
   2   6 -28    4.70    2.40
   2   6 -27   62.49    5.10
   2  -6 -27   60.49    4.20
  -2  -6  27   61.99    4.70
   2   6 -26   17.10    3.10
  -2  -6  26   18.40    2.90
   2  -6 -26   17.70    2.50
  -2  -6  25   27.10    3.30
   2  -6 -25   21.50    2.70
   2  -6 -24   16.50    2.30
  -2  -6  24   19.20    2.90
  -2  -6  23   21.50    2.90
   2  -6 -23   17.70    2.40
  -2  -6  22   22.60    2.90
   2  -6 -22   19.30    2.40
   2  -6 -21   37.70    3.00
  -2  -6  21   45.30    3.60
   2  -6 -20   33.70    2.70
  -2  -6  20   27.50    3.10
  -2  -6  19   60.39    3.90
   2  -6 -19   55.39    3.30
   2  -6 -18   10.60    1.60
  -2  -6  18    8.00    1.80
   2  -6 -17   44.60    2.70
  -2  -6  17   45.90    3.40
   2  -6 -16    1.40    1.00
  -2  -6  16    2.40    1.40
   2  -6 -15    3.80    1.10
  -2  -6  15    5.00    1.50
  -2  -6  14    7.80    1.60
   2  -6 -14    4.80    1.10
  -2  -6  13   49.80    3.20
   2  -6 -13   46.10    2.40
   2  -6 -13   50.39    3.40
   2  -6 -12    3.30    0.90
   2  -6 -12    3.20    1.40
  -2  -6  12    5.40    1.40
   2  -6 -11   36.40    1.90
   2  -6 -11   39.60    2.90
  -2  -6  11   36.00    2.60
   2  -6 -10    1.60    1.30
   2  -6 -10    3.10    0.70
  -2  -6  10    5.70    1.30
   2  -6  -9   13.20    1.10
  -2  -6   9   14.20    1.70
   2  -6  -9   11.90    1.80
  -2   6   8    0.10    1.90
  -2  -6   8    2.30    1.00
   2  -6  -8    0.10    1.10
   2   6  -7  140.19   11.10
  -2   6   7  138.89   10.70
  -2  -6   7  146.99    5.30
   2  -6  -7  154.08    6.10
  -2   6   6    5.40    2.70
   2   6  -6    9.10    3.30
   2  -6  -6    5.30    1.50
  -2  -6   6    5.30    1.20
   2   6  -5  171.48   12.40
  -2   6   5  159.48   11.80
  -2  -6   5  161.68    5.60
   2  -6  -5  162.28    6.50
   2   6  -4   21.30    4.50
  -2   6   4   21.60    4.30
   2  -6  -4   26.10    2.50
  -2  -6   4   23.50    1.90
  -2   6   3  154.08   11.30
   2   6  -3  153.08   11.60
  -2  -6   3  146.09    5.10
   2  -6  -3  157.98    6.20
  -2   6   2   82.39    7.50
   2   6  -2   75.09    7.60
  -2  -6   2   78.89    3.10
   2  -6  -2   82.99    4.20
   2   6  -1  201.88   13.80
  -2   6   1  194.68   13.40
   2  -6  -1  191.88    5.60
  -2  -6   1  192.78    6.00
   2  -6  -1  191.28    7.30
  -2  -6   1  193.68    8.10
  -2   6   0  114.29    9.10
   2   6   0  104.79    9.10
  -2  -6   0  107.99    3.70
   2  -6   0  107.69    3.50
  -2  -6   0  108.89    5.30
   2  -6   0  104.59    4.90
  -2   6  -1  208.38   13.60
   2   6   1  190.38   13.60
   2  -6   1  186.58    5.90
   2  -6   1  200.88    7.50
  -2  -6  -1  190.68    5.90
  -2   6  -2   78.99    7.40
   2   6   2   69.99    7.30
   2  -6   2   83.89    3.00
  -2  -6  -2   78.79    2.90
   2  -6   2   85.19    4.30
   2   6   3  142.39   11.10
  -2   6  -3  148.79   11.10
   2  -6   3  146.49    4.80
   2  -6   3  151.88    6.10
  -2  -6  -3  143.19    4.60
   2   6   4   24.80    4.80
  -2   6  -4   26.30    4.70
  -2  -6  -4   21.00    1.40
   2  -6   4   22.90    1.80
   2  -6   4   27.70    2.70
  -2   6  -5  169.78   12.10
   2   6   5  166.08   12.30
  -2  -6  -5  165.08    5.10
   2  -6   5  169.98    5.70
   2  -6   5  171.08    6.80
  -2   6  -6    7.60    3.10
   2   6   6    6.80    2.90
  -2  -6  -6    5.70    0.90
   2  -6   6    6.10    1.20
  -2   6  -7  145.39   11.00
  -2  -6  -7  142.49    4.60
   2  -6   7  143.69    5.20
  -2   6  -8    0.00    2.00
   2  -6   8    2.80    1.00
  -2  -6  -8    0.30    0.70
  -2   6  -9   11.10    3.40
   2  -6   9   16.40    1.70
  -2  -6  -9   11.00    1.10
  -2  -6 -10    4.40    0.90
   2  -6  10    3.90    1.20
  -2  -6 -11   37.40    2.00
   2  -6  11   33.10    2.50
   2  -6  12    2.60    1.30
  -2  -6 -12    4.20    1.00
  -2  -6 -13   44.40    2.40
   2  -6  13   46.20    3.00
  -2  -6 -14    4.00    1.10
   2  -6  14    3.50    1.40
  -2  -6 -15    7.80    1.30
   2  -6  15    5.70    1.50
   2  -6  16   -0.20    1.20
  -2  -6 -16    1.80    1.00
   2  -6  17   42.60    3.20
  -2  -6 -17   43.90    2.80
  -2  -6 -18   10.40    1.70
   2  -6  18   10.90    2.00
  -2  -6 -19   63.09    3.60
   2  -6  19   64.89    4.10
   2  -6  20   30.90    3.20
  -2  -6 -20   31.80    2.80
  -2  -6 -21   42.80    3.20
   2  -6  21   42.70    3.50
   2  -6  22   16.00    2.50
  -2  -6 -22   18.00    2.30
  -2  -6 -23   17.00    2.40
   2  -6  23   19.80    2.80
   2  -6  24   17.10    2.80
  -2  -6 -24   21.30    2.60
   2  -6  25   20.40    2.90
  -2  -6 -25   21.70    2.80
   2  -6  26   23.00    3.20
  -2  -6 -26   22.20    2.80
  -2   6 -27   58.09    4.90
  -2  -6 -27   53.09    4.00
   2  -6  27   63.89    4.70
  -2   6 -28    2.30    2.20
   2  -6  28   -0.50    1.70
  -2  -6 -28    6.80    2.10
  -2  -7  24    4.30    1.90
   2  -7 -24    1.20    1.50
   2  -7 -23    9.30    2.00
  -2  -7  23    7.00    2.20
   2  -7 -22    0.80    1.30
  -2  -7  22    1.00    1.60
  -2  -7  21   -0.10    1.50
   2  -7 -21   -1.20    1.20
   2  -7 -20    1.50    1.30
  -2  -7  20    1.80    1.60
   2  -7 -19   33.40    2.70
  -2  -7  19   35.20    3.40
   2  -7 -18    0.00    1.10
  -2  -7  18    1.30    1.50
  -2  -7  17   77.89    4.50
   2  -7 -17   81.39    3.80
  -2  -7  16    2.50    1.60
   2  -7 -16   -0.40    1.00
   2  -7 -15   54.99    2.80
  -2  -7  15   49.10    3.50
   2  -7 -14   10.40    1.30
  -2  -7  14    6.60    1.70
   2  -7 -13    9.70    1.20
  -2  -7  13    6.30    1.60
   2  -7 -12   36.70    1.90
  -2  -7  12   36.10    2.80
   2  -7 -11   30.20    1.70
  -2  -7  11   30.70    2.50
   2  -7 -10   34.30    1.70
  -2  -7  10   37.00    2.70
  -2  -7   9  115.79    4.90
  -2  -7   8   12.90    1.80
  -2  -7   7  100.89    4.30
  -2  -7   6   14.30    1.70
  -2  -7   5   49.20    2.70
  -2  -7   4   18.00    1.70
  -2  -7   3   44.50    2.40
  -2  -7   2    4.80    1.00
   2  -7  -1   17.30    1.20
  -2  -7   1   18.00    1.60
  -2  -7   0   20.60    1.60
   2  -7   0   24.20    1.50
   2  -7   1   18.10    1.40
  -2  -7  -1   18.70    1.40
   2  -7   2    4.50    1.00
  -2  -7  -2    4.10    0.80
   2  -7   3   43.70    2.30
  -2  -7  -3   41.70    1.90
   2  -7   4   19.60    1.70
  -2  -7  -4   15.60    1.20
   2  -7   5   59.09    2.90
  -2  -7  -5   57.79    2.30
   2  -7   6   15.70    1.70
  -2  -7  -6   14.70    1.20
  -2  -7  -7  104.79    3.60
   2  -7   7  103.29    4.30
  -2  -7  -8   16.70    1.40
   2  -7   8   14.60    1.80
  -2  -7  -9  108.59    3.80
   2  -7   9  110.69    4.70
   2  -7  10   37.00    2.70
  -2  -7 -10   32.50    1.90
  -2  -7 -11   30.40    1.90
   2  -7  11   32.20    2.60
  -2  -7 -12   32.70    2.00
   2  -7  12   37.10    2.80
   2  -7  13    6.30    1.60
  -2  -7 -13    8.60    1.20
   2  -7  14    8.50    1.80
  -2  -7 -14    6.80    1.30
  -2  -7 -15   49.80    2.80
   2  -7  15   53.19    3.40
   2  -7  16    0.10    1.30
  -2  -7 -16    0.00    1.00
  -2  -7 -17   87.39    3.90
   2  -7  17   75.99    4.50
   2  -7  18    2.50    1.60
  -2  -7 -18    3.30    1.30
  -2  -7 -19   36.40    2.70
   2  -7  19   30.00    3.10
  -2  -7 -20    2.00    1.20
   2  -7  20    3.30    1.70
  -2  -7 -21   -0.70    1.20
   2  -7  21    0.50    1.50
  -2  -7 -22    0.40    1.30
   2  -7  22   -2.60    1.40
   2  -7  23    9.50    2.30
  -2  -7 -23   11.60    2.10
  -2  -7 -24    2.80    1.60
   2  -7  24    2.20    1.90
  -2  -8  19   35.20    3.60
   2  -8 -19   44.10    2.80
   2  -8 -18   10.30    1.50
  -2  -8  18   10.10    2.20
   2  -8 -17   23.70    2.00
  -2  -8  17   21.00    2.70
   2  -8 -16   10.50    1.40
  -2  -8  16   11.40    2.20
  -2  -8  15    8.50    1.90
   2  -8 -15    8.40    1.20
  -2  -8  14    2.30    1.50
   2  -8 -14    1.70    0.80
  -2  -8  13    7.40    1.80
   2  -8 -13   10.70    1.10
  -2  -8  12    2.50    1.50
  -2  -8  11    1.70    1.40
  -2  -8  10    2.90    1.40
  -2  -8   9    0.20    1.10
  -2  -8   8    2.60    1.30
  -2  -8   7   28.00    2.40
  -2  -8   6   19.70    2.00
  -2  -8   5   70.59    3.50
  -2  -8   4   11.90    1.60
  -2  -8   3   82.79    3.70
  -2  -8   2   22.40    1.90
  -2  -8   1   30.80    2.10
  -2  -8   0   58.29    2.80
   2  -8   0   62.49    2.50
   2  -8   1   25.80    1.80
  -2  -8  -1   29.00    1.90
   2  -8   2   21.60    1.80
  -2  -8  -2   21.60    1.60
   2  -8   3   88.19    3.60
  -2  -8  -3   91.59    3.30
   2  -8   4    9.40    1.40
  -2  -8  -4    8.30    1.10
   2  -8   5   69.69    3.30
  -2  -8  -5   64.59    2.60
  -2  -8  -6   20.40    1.40
   2  -8   6   21.20    2.00
  -2  -8  -7   24.60    1.50
   2  -8   7   24.10    2.20
   2  -8   8    1.90    1.20
  -2  -8  -8    2.10    0.80
  -2  -8  -9    2.00    0.70
   2  -8   9    2.20    1.20
  -2  -8 -10    5.10    0.90
   2  -8  10    1.10    1.10
  -2  -8 -11    4.50    0.90
   2  -8  11    4.60    1.50
   2  -8  12    2.10    1.40
  -2  -8 -12    2.30    0.90
  -2  -8 -13   12.60    1.40
   2  -8  13    9.90    1.90
   2  -8  14    1.40    1.40
  -2  -8 -14    0.90    0.90
   2  -8  15    7.90    1.90
  -2  -8 -15    9.20    1.30
  -2  -8 -16    9.20    1.40
   2  -8  16    8.70    1.90
   2  -8  17   18.60    2.60
  -2  -8 -17   19.10    1.90
   2  -8  18    9.50    2.10
  -2  -8 -18   10.70    1.70
   2  -8  19   38.60    3.70
  -2  -8 -19   40.40    2.80
  -2  -9  11   23.20    2.60
  -2  -9  10   22.20    2.60
  -2  -9   9   46.80    3.30
  -2  -9   8   11.00    1.90
  -2  -9   7   36.40    2.80
  -2  -9   6    2.20    1.30
  -2  -9   5   12.50    1.80
  -2  -9   4    1.90    1.20
  -2  -9   3    3.50    1.20
  -2  -9   2    3.20    1.10
  -2  -9   1    0.70    1.00
  -2  -9   0    1.70    1.00
  -2  -9  -1    0.50    0.90
   2  -9   1    1.00    0.80
   2  -9   2    3.30    1.00
  -2  -9  -2    1.90    1.00
   2  -9   3    3.10    1.10
   2  -9   4    0.20    1.00
   2  -9   5   12.80    1.60
   2  -9   6    2.70    1.20
   2  -9   7   34.80    2.50
   2  -9   8    7.60    1.60
   2  -9   9   45.00    3.00
   2  -9  10   15.90    2.20
   2  -9  11   21.10    2.50
  -3   0  36    1.60    1.50
  -3   0  35    1.20    1.40
  -3   0  34    0.80    1.40
  -3   0  33    0.40    1.30
  -3   0  32   -1.10    1.20
  -3   0  31   -0.70    1.20
  -3   0  30   -0.80    1.00
  -3   0  29   -0.60    1.10
  -3   0  28   -0.60    1.10
  -3   0  27    0.50    1.40
   3   0 -27    0.40    3.10
  -3   0  26   -2.60    1.20
   3   0 -26    2.10    3.30
  -3   0  25   -2.70    1.10
   3   0 -25    2.30    3.40
   3   0 -24    2.20    2.60
   3   0 -24   -4.70    1.40
  -3   0  24   -2.60    1.00
  -3   0  23   -1.30    1.20
  -3   0  23   -1.00    1.00
   3   0 -23   -2.80    1.50
   3   0 -23    1.30    2.70
  -3   0  22    0.00    1.20
   3   0 -22   -1.80    0.80
  -3   0  22   -0.40    0.90
   3   0 -22   -2.60    1.10
   3   0 -22   -0.80    1.90
   3   0 -21    0.90    1.00
   3   0 -21   -1.40    1.00
  -3   0  21    0.20    1.10
  -3   0  21    0.50    0.90
   3   0 -21   -0.20    1.90
  -3   0  21   -0.40    0.90
  -3   0  20   -1.20    0.80
  -3   0  20   -0.50    0.80
   3   0 -20    0.30    1.00
   3   0 -20   -0.60    1.80
   3   0 -20    0.10    0.90
  -3   0  20   -0.50    0.70
  -3   0  19   -0.70    0.60
  -3   0  19    0.20    0.90
   3   0 -19    0.10    0.80
   3   0 -19   -1.50    1.70
   3   0 -19   -1.00    0.80
  -3   0  19   -0.30    0.80
  -3   0  18   -0.20    0.70
   3   0 -18   -0.50    1.70
   3   0 -18   -0.50    0.70
  -3   0  18   -1.50    0.80
   3   0 -18   -1.40    0.80
  -3   0  18   -1.10    0.70
  -3   0  18    0.80    0.80
  -3   0  17    0.80    0.90
   3   0 -17   -0.40    0.80
   3   0 -17    0.80    0.80
   3   0 -17   -0.90    0.70
   3   0 -17    0.20    0.80
  -3   0  17   -0.40    0.70
  -3   0  17   -0.10    0.70
  -3   0  17   -0.20    0.70
  -3   0  17    2.20    1.00
   3   0 -17    1.70    1.80
   3   0 -16   -0.20    1.30
  -3   0  16   -0.80    0.70
  -3   0  16    0.30    0.90
   3   0 -16    0.70    0.80
   3   0 -16   -1.50    0.60
   3   0 -16    1.10    0.80
   3   0 -16   -0.90    0.60
  -3   0  16   -0.20    0.70
   3   0 -16    0.10    0.80
  -3   0  16   -0.70    0.60
  -3   0  16   -0.60    0.60
   3   0 -15    0.10    0.80
   3   0 -15   -0.20    0.70
   3   0 -15    0.00    0.70
  -3   0  15    0.10    0.70
   3   0 -15    0.50    1.70
   3   0 -15    0.40    0.80
  -3   0  15   -0.10    0.70
  -3   0  15   -0.10    0.70
   3   0 -15    0.40    0.80
  -3   0  15   -0.70    0.60
  -3   0  15   -1.20    0.70
   3   0 -15   -1.30    0.80
   3   0 -14   -0.20    1.40
  -3   0  14   -0.60    0.70
  -3   0  14   -0.10    0.70
   3   0 -14    0.00    0.70
   3   0 -14    0.30    0.70
   3   0 -14   -1.70    0.50
  -3   0  14   -0.50    0.70
  -3   0  14   -0.50    0.60
   3   0 -14   -0.20    0.70
  -3   0  14   -1.40    0.60
   3   0 -14    0.10    0.70
  -3   0  13   -0.20    0.50
   3   0 -13   -0.30    0.60
   3   0 -13   -0.90    0.60
   3   0 -13    1.70    2.10
  -3   0  13   -0.70    0.50
  -3   0  13   -0.30    0.70
   3   0 -13    0.00    0.70
  -3   0  13    0.00    0.60
   3   0 -13   -0.80    0.90
   3   0 -13    1.10    0.70
  -3   0  13    0.00    0.60
   3   0 -12    1.00    0.60
   3   0 -12   -0.30    0.50
  -3   0  12    0.60    0.50
   3   0 -12   -0.40    0.60
  -3   0  12    0.00    0.60
  -3   0  12   -0.90    0.50
   3   0 -12   -0.50    0.60
  -3   0  12    0.40    0.60
   3   0 -12   -0.50    0.60
  -3   0  12    0.50    0.50
   3   0 -12   -0.40    1.10
  -3   0  11    0.00    0.60
   3   0 -11    1.20    0.70
  -3   0  11    1.10    0.50
   3   0 -11    0.50    0.60
   3   0 -11   -0.60    0.60
   3   0 -11    0.10    0.50
   3   0 -11    0.50    1.20
   3   0 -11   -0.70    0.40
  -3   0  11   -0.20    0.60
  -3   0  11    0.00    0.50
  -3   0  11   -0.80    0.50
   3   0 -10   -0.60    0.50
   3   0 -10   -0.40    0.50
   3   0 -10    0.30    1.10
   3   0 -10   -0.10    0.50
  -3   0  10    0.30    0.50
   3   0 -10   -0.50    0.40
  -3   0  10    0.30    1.00
  -3   0  10    0.10    0.60
  -3   0  10    0.10    0.50
  -3   0  10   -0.10    0.50
   3   0  -9   -0.70    0.40
   3   0  -9    0.10    0.90
  -3   0   9   -0.30    0.40
  -3   0   9   -0.20    0.40
   3   0  -9   -0.20    0.40
  -3   0   9   -0.50    0.40
  -3   0   9    0.30    0.80
  -3   0   9    0.20    0.50
   3   0  -9    0.50    0.40
   3   0  -9    0.00    0.50
  -3   0   8   -0.30    0.40
  -3   0   8   -0.50    0.40
   3   0  -8    0.10    0.40
   3   0  -8   -0.10    0.40
   3   0  -8    0.10    0.50
   3   0  -8   -0.10    0.80
  -3   0   8   -0.60    0.30
   3   0  -8    0.30    0.40
  -3   0   8    0.20    0.40
  -3   0   8    0.30    0.80
  -3   0   7    0.20    0.40
  -3   0   7    0.20    0.40
   3   0  -7    0.20    0.40
   3   0  -7   -0.30    0.70
  -3   0   7   -1.30    0.30
  -3   0   7    0.70    0.80
   3   0  -7    0.60    0.50
   3   0  -7   -0.50    0.40
  -3   0   7    1.10    0.60
   3   0  -7    0.10    0.30
  -3   0   6   -0.50    0.30
   3   0  -6    0.20    0.70
   3   0  -6   -0.40    0.40
   3   0  -6   -0.20    0.40
  -3   0   6    0.80    0.40
  -3   0   6    0.00    0.60
   3   0  -6    0.30    0.30
   3   0  -6   -0.30    0.40
  -3   0   6   -0.50    0.30
  -3   0   6    0.80    0.40
  -3   0   5   -0.40    0.40
  -3   0   5   -0.10    0.40
   3   0  -5   -1.00    0.20
  -3   0   5   -0.70    0.30
  -3   0   5   -0.60    0.30
   3   0  -5   -0.70    0.30
   3   0  -5    0.20    0.70
   3   0  -5   -1.40    0.30
  -3   0   5    0.40    0.60
   3   0  -5   -1.00    0.30
  -3   0   4   -0.30    0.30
  -3   0   4   -0.40    0.30
  -3   0   4   -0.20    0.30
   3   0  -4   -0.70    0.20
   3   0  -4   -0.60    0.30
   3   0  -4   -0.50    0.30
  -3   0   4    0.10    0.40
   3   0  -4   -0.20    0.40
  -3   0   3    0.10    0.30
   3   0  -3    0.40    0.30
  -3   0   3   -0.10    0.30
   3   0  -3    0.40    0.30
  -3   0   3    0.30    0.30
   3   0  -3    0.10    0.20
  -3   0   3    0.40    0.30
   3   0  -3    0.50    0.30
   3   0  -2   -2.60    0.20
   3   0  -2   -2.60    0.20
   3   0  -2   -3.00    0.20
   3   0  -2   -2.10    0.30
  -3   0   2   -2.00    0.30
  -3   0   2   -2.30    0.20
   3   0  -2   -1.70    0.30
   3   0  -2   -0.30    0.40
  -3   0   2   -2.80    0.20
  -3   0   2   -2.20    0.30
   3   0  -1   -0.10    0.20
  -3   0   1   -0.30    0.10
  -3   0   1   -0.20    0.20
   3   0  -1   -0.20    0.20
   3   0  -1   -0.30    0.10
  -3   0   1    0.10    0.20
  -3   0   1    0.50    0.20
   3   0  -1    0.20    0.20
  -3   0   1    0.00    0.20
   3   0  -1   -0.30    0.10
   3   0   0   -0.10    0.10
   3   0   0   -0.10    0.10
   3   0   0    0.60    0.20
  -3   0   0    0.10    0.10
   3   0   0    0.00    0.10
  -3   0   0    0.20    0.20
  -3   0   0    0.10    0.20
   3   0   0    0.20    0.20
  -3   0   0   -0.10    0.10
  -3   0   0    0.30    0.20
   3   0   0    0.00    0.10
  -3   0  -1   -0.50    0.20
  -3   0  -1   -0.10    0.20
  -3   0  -1   -0.40    0.20
   3   0   1   -0.10    0.20
   3   0   1    0.00    0.20
   3   0   1   -0.20    0.20
  -3   0  -1   -0.20    0.20
   3   0   1   -0.20    0.10
  -3   0  -1   -0.10    0.20
  -3   0  -1   -0.30    0.10
   3   0   1   -0.20    0.20
   3   0   1   -0.30    0.20
   3   0   2   -2.20    0.40
   3   0   2   -2.20    0.40
  -3   0  -2   -2.10    0.30
   3   0   2   -2.50    0.20
   3   0   2   -2.10    0.20
  -3   0  -2   -1.80    0.30
  -3   0  -2   -1.90    0.40
   3   0   2   -1.60    0.30
  -3   0  -2   -2.00    0.20
  -3   0  -2   -2.50    0.30
   3   0   3   -0.10    0.40
   3   0   3    0.10    0.20
  -3   0  -3    0.30    0.20
   3   0   3    0.20    0.30
  -3   0  -3    0.10    0.30
   3   0   3    0.20    0.30
  -3   0  -3    0.10    0.20
  -3   0  -3    0.40    0.30
  -3   0  -3   -0.20    0.30
   3   0   3   -0.30    0.20
   3   0   4   -0.10    0.50
  -3   0  -4   -0.50    0.40
   3   0   4   -0.40    0.40
   3   0   4   -0.30    0.30
  -3   0  -4   -0.30    0.30
  -3   0  -4   -0.40    0.30
   3   0   4   -0.60    0.30
  -3   0  -4   -0.40    0.40
  -3   0  -4   -0.10    0.30
   3   0   4    0.20    0.30
   3   0   5   -0.60    0.30
   3   0   5   -0.60    0.30
   3   0   5   -1.10    0.50
  -3   0  -5   -0.20    0.40
  -3   0  -5   -0.60    0.60
  -3   0  -5   -0.40    0.30
  -3   0  -5   -0.40    0.30
   3   0   5   -0.20    0.50
  -3   0  -5    0.00    0.50
   3   0   5   -0.20    0.40
   3   0   6   -0.50    0.60
  -3   0  -6    0.00    0.30
  -3   0  -6    0.40    0.40
  -3   0  -6    0.20    0.50
   3   0   6    0.00    0.30
   3   0   6   -0.20    0.30
   3   0   6    0.10    0.40
  -3   0  -6    0.20    0.70
  -3   0  -6   -0.20    0.40
   3   0   6    0.30    0.40
   3   0   7    0.10    0.40
   3   0   7   -0.10    0.40
   3   0   7    0.00    0.50
  -3   0  -7    0.30    0.60
  -3   0  -7    0.00    0.40
  -3   0  -7   -0.10    0.30
  -3   0  -7    0.20    0.80
  -3   0  -7   -0.20    0.40
   3   0   7    0.10    0.30
   3   0   7    0.20    0.80
   3   0   8   -0.30    0.50
   3   0   8   -0.50    0.40
  -3   0  -8    0.60    0.50
  -3   0  -8    0.50    0.90
   3   0   8    0.00    0.50
   3   0   8    0.40    0.90
  -3   0  -8    0.30    0.40
  -3   0  -8    0.30    0.50
  -3   0  -8    0.30    0.60
   3   0   8    0.10    0.40
  -3   0  -9    0.40    0.40
  -3   0  -9   -0.60    0.70
  -3   0  -9   -0.60    0.40
   3   0   9    0.10    0.50
  -3   0  -9   -0.20    0.60
   3   0   9   -0.30    0.40
   3   0   9    0.20    0.40
   3   0   9    0.00    0.50
  -3   0  -9   -0.30    0.40
  -3   0 -10    0.20    0.70
   3   0  10   -1.00    0.40
   3   0  10    0.20    0.50
  -3   0 -10    0.50    1.10
  -3   0 -10   -0.40    0.50
  -3   0 -10   -0.50    0.50
   3   0  10    0.10    0.50
   3   0  10   -0.70    0.40
  -3   0 -10   -0.30    0.50
   3   0  10   -0.50    0.50
  -3   0 -10    0.00    0.50
  -3   0 -11   -0.10    0.60
   3   0  11   -0.60    0.40
   3   0  11    0.30    0.60
   3   0  11   -0.10    0.40
   3   0  11    0.10    0.60
  -3   0 -11    0.00    1.00
  -3   0 -11   -0.40    0.50
  -3   0 -11   -0.20    0.50
  -3   0 -11    0.40    0.50
   3   0  11    0.00    0.60
  -3   0 -11    0.00    0.70
  -3   0 -12    0.40    1.10
  -3   0 -12   -0.30    0.50
  -3   0 -12   -0.90    0.50
   3   0  12    0.40    0.50
   3   0  12   -0.30    0.60
  -3   0 -12    0.10    0.50
  -3   0 -12   -0.20    0.50
   3   0  12    0.40    0.60
   3   0  12    0.30    0.60
  -3   0 -12   -0.60    0.70
   3   0  12   -0.90    0.60
  -3   0 -13    0.70    0.70
  -3   0 -13    0.30    0.60
  -3   0 -13    0.20    0.60
   3   0  13   -0.20    0.50
  -3   0 -13   -0.40    0.80
   3   0  13    0.00    0.70
   3   0  13   -0.40    0.60
  -3   0 -13    0.40    1.60
  -3   0 -13    1.30    1.30
   3   0  13    0.40    0.70
   3   0  13   -0.40    0.50
   3   0  14    1.10    0.80
  -3   0 -14   -0.10    0.90
  -3   0 -14   -0.70    0.70
  -3   0 -14   -0.60    0.60
   3   0  14    0.20    0.70
  -3   0 -14   -1.00    0.70
  -3   0 -14   -0.10    0.70
   3   0  14   -0.20    0.70
  -3   0 -14    0.20    1.30
   3   0  14   -0.20    0.70
   3   0  14   -0.70    0.60
  -3   0 -15   -0.10    0.80
  -3   0 -15   -1.50    0.70
   3   0  15   -0.50    0.60
   3   0  15   -0.40    0.60
   3   0  15   -0.70    0.80
   3   0  15   -1.20    0.60
   3   0  15    1.30    0.80
  -3   0 -15    0.90    0.80
  -3   0 -15   -0.40    1.10
  -3   0 -15    0.70    1.60
  -3   0 -15   -0.70    0.80
  -3   0 -16    0.50    0.90
   3   0  16    0.20    0.70
  -3   0 -16   -0.20    0.60
   3   0  16   -0.20    0.70
   3   0  16   -0.30    0.60
  -3   0 -16   -1.30    0.60
  -3   0 -16   -0.60    0.80
  -3   0 -16   -0.20    1.30
   3   0  16   -1.10    0.60
  -3   0 -16   -1.40    0.70
  -3   0 -16   -0.10    1.10
   3   0  16   -1.50    0.60
   3   0  17    0.40    0.80
   3   0  17   -0.50    0.80
  -3   0 -17    1.40    1.70
  -3   0 -17   -0.70    0.80
  -3   0 -17   -0.50    0.80
  -3   0 -17    0.00    0.70
   3   0  17   -0.30    0.70
  -3   0 -17    1.60    1.20
   3   0  17   -0.10    0.80
  -3   0 -17    0.00    0.80
   3   0  17   -1.00    0.70
   3   0  18   -1.10    0.60
  -3   0 -18   -0.40    0.70
   3   0  18    0.70    0.80
   3   0  18    1.20    0.90
  -3   0 -18   -0.30    1.40
  -3   0 -18    1.20    1.30
  -3   0 -18   -0.40    0.80
  -3   0 -18   -1.10    0.70
   3   0  18   -1.50    0.60
  -3   0 -19   -0.30    0.90
   3   0  19   -1.00    0.80
  -3   0 -19    1.60    1.50
  -3   0 -19   -0.50    0.90
  -3   0 -19    0.50    1.90
   3   0  19    0.20    0.80
   3   0  19   -0.30    0.80
   3   0  19   -0.60    0.70
  -3   0 -20   -0.60    0.90
   3   0  20   -0.90    0.70
  -3   0 -20    2.10    1.70
   3   0  20   -0.20    0.80
  -3   0 -20   -0.20    1.80
   3   0  20    0.30    0.90
  -3   0 -20    1.50    1.10
   3   0  20    0.00    0.80
  -3   0 -21    2.50    1.10
   3   0  21   -0.80    0.80
   3   0  21    0.00    1.00
  -3   0 -21   -1.00    1.10
  -3   0 -21   -0.50    1.90
   3   0  21   -0.90    0.80
   3   0  22   -0.60    1.10
   3   0  22    1.40    1.10
  -3   0 -22    0.90    2.30
   3   0  22   -0.10    0.90
  -3   0 -22    0.20    1.20
   3   0  23    0.30    1.00
  -3   0 -23   -1.40    1.50
  -3   0 -23    3.00    2.70
   3   0  23   -0.20    1.10
  -3   0 -24    0.10    1.50
  -3   0 -24    1.40    2.60
   3   0  24   -0.60    1.10
   3   0  25   -0.30    1.10
  -3   0 -25    2.30    2.00
  -3   0 -25    2.30    3.30
   3   0  26   -2.20    1.10
  -3   0 -26    0.60    1.80
   3   0  27    0.00    1.30
   3   0  28   -0.70    1.10
   3   0  29   -0.70    1.10
   3   0  30   -1.80    1.10
   3   0  31   -0.10    1.30
   3   0  32    1.30    1.40
   3   0  33   -0.70    1.30
   3   0  34    2.90    1.60
   3   0  35    0.90    1.40
   3   0  36    0.10    1.40
  -3   1  36   -0.20    1.50
  -3  -1  36    2.20    1.60
  -3   1  35   11.00    2.30
  -3  -1  35   15.20    2.30
  -3   1  34    3.60    1.60
  -3  -1  34    4.90    1.60
  -3   1  33   10.40    2.00
  -3  -1  33    8.90    1.90
  -3   1  32    0.70    1.30
  -3  -1  32    0.70    1.30
  -3   1  31   29.30    2.80
  -3  -1  31   36.00    2.90
  -3   1  30    0.00    1.20
   3   1 -30   -1.00    2.40
  -3  -1  30    1.30    1.20
  -3   1  29   14.70    2.10
   3   1 -29   14.00    2.70
  -3  -1  29   14.50    2.10
  -3   1  28   11.00    2.00
   3   1 -28   12.20    2.40
  -3  -1  28   13.60    2.00
   3   1 -27   19.30    2.70
  -3   1  27   17.00    2.20
   3  -1 -27   22.00    2.80
  -3  -1  27   25.00    2.40
   3   1 -26   18.90    5.20
   3   1 -26   14.20    2.50
  -3   1  26   13.20    2.00
  -3  -1  26   16.50    2.10
   3  -1 -26   19.50    2.60
   3  -1 -26   18.90    4.60
   3   1 -25   46.50    3.80
  -3   1  25   44.90    3.10
   3   1 -25   52.09    7.60
   3  -1 -25   54.99    6.60
   3  -1 -25   53.69    3.70
  -3  -1  25   47.30    3.10
   3   1 -24   33.30    3.10
   3   1 -24   34.10    6.30
  -3   1  24   33.20    2.70
   3  -1 -24   35.80    2.90
   3  -1 -24   45.30    5.60
  -3  -1  24   33.30    2.60
   3   1 -23   13.20    2.20
   3   1 -23   11.20    4.10
  -3   1  23   13.80    1.80
   3  -1 -23   14.50    3.90
   3  -1 -23   13.20    2.10
  -3  -1  23   16.10    1.90
  -3   1  22   24.90    2.40
  -3   1  22   20.60    2.50
   3   1 -22   23.50    2.50
   3   1 -22   25.00    5.20
  -3   1  22   21.70    2.20
  -3  -1  22   23.30    2.20
   3  -1 -22   22.80    4.40
   3  -1 -22   23.50    2.50
  -3   1  21    2.40    1.20
  -3   1  21    5.30    1.40
   3   1 -21    1.80    1.50
   3   1 -21    1.30    2.30
  -3   1  21    2.40    1.40
  -3  -1  21    2.30    1.10
   3  -1 -21    3.20    2.30
   3  -1 -21    0.50    1.20
   3   1 -20    9.30    1.80
  -3   1  20   10.50    1.70
  -3   1  20    8.90    1.50
   3   1 -20    9.40    3.20
  -3   1  20    9.30    1.70
  -3  -1  20   10.20    1.80
  -3  -1  20    8.20    1.40
   3  -1 -20   11.50    3.10
   3  -1 -20   10.20    1.60
   3   1 -19    3.40    1.20
   3   1 -19    3.50    1.30
   3   1 -19    2.40    2.20
   3   1 -19    1.50    1.20
  -3   1  19    3.30    1.20
  -3   1  19    2.80    1.00
  -3   1  19    5.40    1.30
  -3  -1  19    4.90    1.40
  -3  -1  19    6.10    1.50
  -3  -1  19    3.90    1.10
   3  -1 -19    4.70    2.20
   3  -1 -19    6.40    1.40
  -3  -1  19    4.60    1.40
   3   1 -18   15.20    2.00
   3   1 -18   12.90    3.60
  -3   1  18   16.80    2.00
   3   1 -18   19.20    2.10
  -3   1  18   18.40    2.10
  -3   1  18   16.60    1.60
   3   1 -18   16.50    2.00
   3   1 -18   15.90    2.00
  -3  -1  18   18.90    2.20
  -3  -1  18   13.40    1.60
  -3  -1  18   16.80    2.10
  -3  -1  18   16.60    2.10
   3  -1 -18   14.70    1.80
  -3  -1  18   19.30    2.20
   3  -1 -18   15.90    3.30
   3   1 -17   19.90    2.10
   3   1 -17   15.30    2.00
   3   1 -17   25.60    2.30
  -3   1  17   18.40    1.80
  -3   1  17   17.50    1.60
   3   1 -17   18.70    1.90
  -3   1  17   16.20    1.90
   3   1 -17   12.50    3.40
  -3  -1  17   19.30    2.00
   3  -1 -17   20.40    2.00
  -3  -1  17   18.10    1.70
  -3  -1  17   19.70    2.20
   3  -1 -17   20.60    3.30
  -3  -1  17   20.10    2.10
  -3  -1  17   20.60    2.30
   3   1 -16  128.29    5.40
   3   1 -16  124.39    5.20
  -3   1  16  125.79    4.70
  -3   1  16  116.99    5.20
   3   1 -16  126.29    5.60
   3   1 -16  129.79    5.30
  -3   1  16  121.19    5.10
  -3   1  16  126.49    5.00
   3   1 -16  101.09    9.10
   3  -1 -16  122.19    5.10
   3  -1 -16  113.89    4.80
  -3  -1  16  120.59    5.20
   3  -1 -16  117.79    5.00
  -3  -1  16  122.19    4.70
  -3  -1  16  120.49    5.50
  -3  -1  16  119.99    5.80
   3  -1 -16  127.59    8.60
  -3  -1  16  134.59    5.40
   3   1 -15   22.40    2.00
  -3   1  15   20.30    1.80
   3   1 -15   22.60    1.90
  -3   1  15   24.80    1.50
   3   1 -15   22.90    4.10
  -3   1  15   21.70    1.90
  -3   1  15   20.90    1.60
  -3   1  15   22.00    2.00
   3   1 -15   20.70    2.10
   3   1 -15   25.20    2.10
   3  -1 -15   24.50    2.00
  -3  -1  15   25.50    2.10
  -3  -1  15   26.40    2.20
   3  -1 -15   21.80    1.50
  -3  -1  15   21.30    1.70
   3  -1 -15   21.90    2.00
   3  -1 -15   19.80    1.90
  -3  -1  15   20.80    2.10
  -3  -1  15   21.00    2.10
   3  -1 -15   21.20    3.10
   3   1 -14   31.10    4.10
   3   1 -14   36.80    2.40
  -3   1  14   37.70    1.80
  -3   1  14   34.50    2.20
  -3   1  14   35.20    2.20
   3   1 -14   38.00    2.50
   3   1 -14   35.60    2.40
   3   1 -14   34.90    2.40
  -3   1  14   35.30    2.30
  -3   1  14   35.00    1.90
   3  -1 -14   36.90    3.80
   3  -1 -14   33.80    2.30
   3  -1 -14   42.50    2.50
  -3  -1  14   36.30    2.50
  -3  -1  14   31.50    2.30
   3  -1 -14   34.40    2.10
  -3  -1  14   34.00    2.00
  -3  -1  14   33.40    2.40
  -3  -1  14   34.80    2.40
   3  -1 -14   35.30    1.80
  -3   1  13   21.10    1.80
  -3   1  13   21.70    1.70
   3   1 -13   25.20    2.10
   3   1 -13   18.70    1.70
  -3   1  13   19.30    1.70
   3   1 -13   21.90    1.90
   3   1 -13   20.10    2.00
   3   1 -13   23.00    2.10
  -3   1  13   21.90    1.30
   3   1 -13   20.80    3.60
   3  -1 -13   21.30    1.30
  -3  -1  13   19.00    1.80
   3  -1 -13   18.10    1.70
   3  -1 -13   19.60    1.70
  -3  -1  13   19.40    1.90
   3  -1 -13   21.20    2.70
  -3  -1  13   19.30    1.60
   3  -1 -13   22.20    1.80
  -3  -1  13   20.40    1.80
   3  -1 -13   21.60    1.90
  -3  -1  13   22.00    1.90
   3   1 -12   25.00    2.00
   3   1 -12   32.90    2.30
   3   1 -12   32.90    3.90
   3   1 -12   27.60    2.00
  -3   1  12   30.20    2.00
  -3   1  12   31.40    1.50
  -3   1  12   27.30    2.00
   3   1 -12   30.00    2.30
   3   1 -12   29.30    2.10
  -3   1  12   27.00    2.00
  -3  -1  12   26.80    2.10
   3  -1 -12   26.80    1.90
   3  -1 -12   31.10    2.10
   3  -1 -12   35.30    3.50
   3  -1 -12   31.40    1.50
  -3  -1  12   32.40    2.20
  -3  -1  12   28.30    1.80
   3  -1 -12   27.70    1.90
  -3  -1  12   28.80    2.10
   3  -1 -12   26.40    1.90
  -3  -1  12   28.00    2.00
  -3   1  11    6.90    0.60
  -3   1  11    3.50    0.90
  -3   1  11    5.00    1.00
  -3   1  11    3.80    0.90
   3   1 -11    4.40    1.10
   3   1 -11    2.30    0.80
   3   1 -11    4.80    1.00
   3   1 -11    6.30    1.90
   3   1 -11    3.80    1.00
  -3   1  11    5.40    1.60
   3   1 -11    5.80    1.10
   3  -1 -11    6.20    0.60
  -3  -1  11    5.70    1.10
  -3  -1  11    5.60    1.10
   3  -1 -11    4.50    1.00
   3  -1 -11    3.20    0.90
  -3  -1  11    3.40    1.00
   3  -1 -11    5.90    1.00
  -3  -1  11    5.70    1.10
  -3  -1  11    2.90    0.80
   3  -1 -11    7.70    1.70
   3   1 -10   50.79    2.80
  -3   1  10   40.70    4.00
   3   1 -10   58.19    2.70
  -3   1  10   52.19    2.50
  -3   1  10   50.49    2.50
  -3   1  10   49.99    2.50
   3   1 -10   51.39    2.60
   3   1 -10   55.19    4.50
   3   1 -10   60.69    3.00
   3   1 -10   50.89    2.60
  -3   1  10   52.99    2.10
   3  -1 -10   54.09    2.60
  -3  -1  10   50.29    2.60
  -3  -1  10   54.89    2.70
   3  -1 -10   55.99    2.10
   3  -1 -10   59.59    4.10
  -3  -1  10   54.59    2.30
  -3  -1  10   51.59    2.90
  -3  -1  10   48.90    2.70
   3  -1 -10   52.99    2.50
   3   1  -9  136.19    5.80
  -3   1   9  134.19    4.80
   3   1  -9  130.49    4.90
   3   1  -9  145.69    5.40
  -3   1   9  131.49    5.00
  -3   1   9  115.19    8.10
   3   1  -9  146.09    8.50
  -3   1   9  137.39    4.80
  -3   1   9  141.19    5.00
   3   1  -9  140.29    5.00
  -3  -1   9  137.19    4.70
   3  -1  -9  144.29    4.80
   3  -1  -9  137.69    5.10
   3  -1  -9  157.28    8.10
  -3  -1   9  138.79    5.00
  -3  -1   9  136.29    5.90
  -3  -1   9  136.99    4.90
  -3   1   8   60.49    4.50
   3   1  -8   66.99    2.90
  -3   1   8   67.39    2.70
   3   1  -8   70.99    4.80
   3   1  -8   65.29    2.90
   3   1  -8   66.59    3.30
  -3   1   8   61.99    2.80
  -3   1   8   68.89    2.70
   3   1  -8   70.29    3.20
   3  -1  -8   67.99    2.90
   3  -1  -8   73.89    4.40
  -3  -1   8   71.19    3.40
  -3  -1   8   68.19    3.10
   3  -1  -8   69.99    2.80
  -3  -1   8   66.79    2.90
  -3  -1   8   75.69    4.90
  -3  -1   8   69.69    2.90
   3   1  -7  224.18   11.60
  -3   1   7  209.08    6.60
   3   1  -7  208.68    6.80
  -3   1   7  203.78    7.10
   3   1  -7  201.88    8.20
   3   1  -7  210.28    7.40
   3   1  -7  211.08    6.80
  -3   1   7  201.28   11.20
  -3   1   7  206.08    6.50
  -3  -1   7  204.88    6.70
  -3  -1   7  202.08    7.30
   3  -1  -7  206.08    6.60
  -3  -1   7  209.48    6.80
  -3  -1   7  209.88    8.30
   3  -1  -7  216.28    6.60
   3  -1  -7  215.68    7.10
   3  -1  -7  221.28   11.10
  -3  -1   7  227.38   11.70
  -3   1   6   97.09    3.40
   3   1  -6   97.79    4.30
   3   1  -6   93.69    3.50
  -3   1   6   97.89    3.40
   3   1  -6   95.99    3.50
   3   1  -6   99.39    3.90
  -3   1   6   94.69    3.60
   3   1  -6   98.99    5.90
  -3   1   6  102.29    5.60
  -3  -1   6  104.19    6.10
  -3  -1   6   96.39    4.30
   3  -1  -6  103.19    5.50
  -3  -1   6   99.79    3.60
   3  -1  -6   99.19    3.70
  -3  -1   6   92.89    3.50
   3  -1  -6   95.69    3.40
  -3  -1   6   98.69    3.90
  -3   1   5  469.45   20.90
   3   1  -5  411.06   12.30
  -3   1   5  418.16   12.10
  -3   1   5  408.56   14.70
   3   1  -5  436.46   13.50
  -3   1   5  424.76   12.10
   3   1  -5  423.26   15.40
  -3   1   5  418.36   13.20
   3   1  -5  421.16   21.40
   3   1  -5  427.86   12.30
   3  -1  -5  352.26   12.00
  -3  -1   5  423.36   15.40
  -3  -1   5  425.56   12.70
   3  -1  -5  425.56   20.80
  -3  -1   5  428.36   12.30
  -3  -1   5  415.96   13.40
  -3  -1   5  410.56   12.30
  -3  -1   5  440.36   21.50
   3  -1  -5  412.86   12.30
   3  -1  -5  424.16   13.20
   3  -1  -5  415.36   12.10
   3   1  -4  105.19    4.40
   3   1  -4  100.69    3.50
  -3   1   4  102.49    3.80
  -3   1   4   99.99    3.70
  -3   1   4  102.59    3.30
  -3   1   4  106.79    3.30
   3   1  -4   99.39    6.00
   3   1  -4  105.29    3.90
   3   1  -4  104.99    3.50
  -3   1   4  109.39    5.50
  -3  -1   4  103.39    3.80
  -3  -1   4  104.49    6.10
   3  -1  -4   96.09    3.30
   3  -1  -4   98.29    3.30
  -3  -1   4  105.79    3.50
  -3  -1   4   99.79    3.50
   3  -1  -4  101.79    3.90
  -3  -1   4  105.09    3.60
   3  -1  -4  103.39    3.70
  -3  -1   4  104.59    4.40
   3   1  -3    3.20    0.50
   3   1  -3    3.90    0.60
  -3   1   3    4.60    0.60
  -3   1   3    5.10    0.60
   3   1  -3    3.80    1.00
   3   1  -3    5.20    0.70
   3   1  -3    4.30    0.80
  -3   1   3    4.00    0.50
   3   1  -3    3.90    0.60
  -3   1   3    3.80    0.50
  -3   1   3    4.10    0.50
  -3   1   3    3.90    0.50
   3  -1  -3    5.00    0.70
   3  -1  -3    4.30    0.60
  -3  -1   3    4.00    0.60
  -3  -1   3    2.60    0.50
   3  -1  -3    4.30    0.40
  -3  -1   3    4.20    0.50
   3  -1  -3    4.20    0.50
  -3  -1   3    4.40    1.00
   3  -1  -3    5.10    0.50
  -3  -1   3    4.00    0.60
   3   1  -2   43.70    1.70
  -3   1   2   44.40    1.90
   3   1  -2   47.00    1.90
   3   1  -2   45.40    3.10
  -3   1   2   45.20    1.50
  -3   1   2   44.20    1.50
   3   1  -2   43.40    1.70
   3   1  -2   41.60    2.20
   3   1  -2   44.00    1.70
  -3   1   2   44.00    1.90
  -3  -1   2   41.50    1.70
   3  -1  -2   43.40    1.50
   3  -1  -2   42.20    1.90
   3  -1  -2   42.60    1.50
  -3  -1   2   44.90    1.70
   3  -1  -2   46.00    2.00
   3  -1  -2   45.10    1.80
  -3  -1   2   45.10    1.90
   3  -1  -2   45.30    1.50
  -3   1   1  198.08    9.90
  -3   1   1  200.08    6.50
  -3   1   1  199.48    5.70
  -3   1   1  195.68    7.30
   3   1  -1  191.18    5.80
   3   1  -1  199.18    5.80
  -3   1   1  198.58    5.60
   3   1  -1  204.68    6.30
   3   1  -1  192.18    6.00
  -3   1   1  192.88    5.80
   3  -1  -1  196.38    5.60
  -3  -1   1  204.08    6.00
  -3  -1   1  183.98    5.80
   3  -1  -1  198.78    7.30
  -3  -1   1  201.78    6.30
   3  -1  -1  192.28    5.90
   3  -1  -1  191.98    5.60
  -3   1   0   25.80    1.30
   3   1   0   23.60    1.10
   3   1   0   27.30    1.10
  -3   1   0   25.00    1.00
  -3   1   0   24.60    1.00
   3   1   0   23.40    1.10
  -3   1   0   25.10    1.40
  -3   1   0   25.00    1.70
  -3   1   0   23.80    1.00
   3   1   0   25.40    1.10
   3  -1   0   23.70    0.90
   3  -1   0   25.90    0.90
   3  -1   0   24.60    1.40
  -3  -1   0   23.80    1.00
  -3  -1   0   25.00    1.10
   3  -1   0   27.00    1.80
   3  -1   0   24.10    0.90
  -3  -1   0   24.90    1.10
   3   1   1  200.48    5.70
  -3   1  -1  197.48    6.40
  -3   1  -1  200.28    5.70
  -3   1  -1  192.18    5.70
  -3   1  -1  206.38   10.10
   3   1   1  188.48    5.90
   3   1   1  190.38    5.70
   3   1   1  203.18    6.10
  -3   1  -1  191.78    5.90
  -3   1  -1  196.18    7.40
   3  -1   1  178.68    5.60
   3  -1   1  203.98   10.10
   3  -1   1  203.58    7.50
  -3  -1  -1  193.08    5.70
   3  -1   1  192.28    5.70
   3  -1   1  193.18    6.40
  -3  -1  -1  192.48    6.10
   3  -1   1  191.78    5.80
  -3   1  -2   49.90    3.00
  -3   1  -2   42.50    1.60
  -3   1  -2   43.90    1.60
  -3   1  -2   42.60    2.20
   3   1   2   44.00    1.50
   3   1   2   42.80    1.60
   3   1   2   41.90    1.60
  -3   1  -2   44.20    1.90
   3  -1   2   45.00    1.60
  -3  -1  -2   44.20    1.60
   3  -1   2   43.30    2.20
   3  -1   2   48.80    3.00
   3  -1   2   42.80    1.90
   3  -1   2   41.30    1.60
  -3   1  -3    3.40    0.60
  -3   1  -3    4.00    0.50
   3   1   3    4.80    0.50
  -3   1  -3    5.30    1.10
  -3   1  -3    4.40    0.60
  -3   1  -3    4.90    0.80
   3   1   3    4.80    0.60
   3   1   3    4.60    0.50
   3   1   3    5.50    1.00
   3  -1   3    4.60    1.00
   3  -1   3    5.60    0.70
   3  -1   3    4.20    0.50
   3  -1   3    4.00    0.80
  -3  -1  -3    5.30    0.50
   3   1   4  101.19    3.30
   3   1   4  100.29    3.40
  -3   1  -4  107.79    6.40
   3   1   4  104.19    6.00
  -3   1  -4  102.29    3.40
   3   1   4  101.49    4.20
  -3   1  -4  101.99    4.40
  -3   1  -4  105.89    3.80
  -3   1  -4   95.49    3.40
   3  -1   4  102.29    4.50
  -3  -1  -4   99.99    4.20
   3  -1   4  122.09    6.40
   3  -1   4  100.39    3.80
  -3  -1  -4   99.49    3.30
  -3  -1  -4  101.59    6.00
   3  -1   4   98.89    3.40
  -3   1  -5  435.66   13.30
  -3   1  -5  406.66   21.90
   3   1   5  419.16   12.70
   3   1   5  427.16   15.30
  -3   1  -5  405.06   12.20
   3   1   5  416.96   12.10
  -3   1  -5  419.16   12.20
  -3   1  -5  429.06   15.50
   3   1   5  417.36   21.30
   3   1   5  405.56   12.10
   3  -1   5  488.65   22.00
  -3  -1  -5  409.76   12.10
   3  -1   5  407.96   13.30
  -3  -1  -5  420.96   15.20
   3  -1   5  420.56   15.50
  -3  -1  -5  425.86   12.70
   3  -1   5  411.06   12.20
  -3  -1  -5  422.96   21.40
   3  -1   5  405.56   12.20
   3   1   6   99.79    4.20
  -3   1  -6  100.89    4.50
   3   1   6   97.09    3.20
   3   1   6   97.49    3.40
  -3   1  -6   98.19    3.50
   3   1   6   95.49    3.40
  -3   1  -6  103.39    3.80
   3   1   6  102.39    6.00
  -3   1  -6   93.99    3.50
  -3  -1  -6   96.59    3.40
   3  -1   6   97.89    3.50
   3  -1   6   94.09    3.80
  -3  -1  -6  104.29    3.20
   3  -1   6   99.89    4.50
   3  -1   6   97.79    3.50
  -3  -1  -6  102.59    6.00
  -3  -1  -6  102.29    4.20
  -3   1  -7  210.38    7.10
  -3   1  -7  212.38    6.60
   3   1   7  205.58    6.50
   3   1   7  203.88    8.20
  -3   1  -7  214.28    8.30
   3   1   7  211.28   11.40
  -3   1  -7  202.28    6.60
   3   1   7  210.08    6.60
  -3   1  -7  188.78   12.10
   3   1   7  202.08    6.50
   3  -1   7  202.58    6.60
   3  -1   7  221.98   12.10
   3  -1   7  209.98    8.40
  -3  -1  -7  208.98    6.50
   3  -1   7  202.58    6.60
   3  -1   7  204.58    7.10
  -3  -1  -7  211.08    8.00
  -3  -1  -7  211.28   11.40
  -3  -1  -7  215.08    6.60
   3   1   8   68.59    2.70
  -3   1  -8   69.79    3.00
   3   1   8   62.29    3.40
  -3   1  -8   65.09    2.80
   3   1   8   66.89    2.70
  -3   1  -8   60.79    5.40
   3   1   8   70.49    2.60
  -3   1  -8   68.69    2.90
  -3   1  -8   72.09    3.60
   3  -1   8   66.99    2.80
  -3  -1  -8   71.29    2.60
   3  -1   8   71.09    2.90
  -3  -1  -8   70.49    3.30
  -3  -1  -8   67.39    2.70
   3  -1   8   70.49    3.00
   3  -1   8   72.99    3.60
  -3   1  -9  132.69    4.80
  -3   1  -9  115.39    8.90
   3   1   9  124.29    5.90
  -3   1  -9  144.49    6.10
   3   1   9  134.79    4.60
   3   1   9  133.49    4.70
  -3   1  -9  140.99    4.90
  -3   1  -9  143.49    5.20
   3   1   9  138.79    4.70
   3  -1   9  136.29    6.00
  -3  -1  -9  136.39    4.70
  -3  -1  -9  140.09    4.70
  -3  -1  -9  142.09    5.70
   3  -1   9  127.49    5.10
   3  -1   9  138.39    4.90
   3  -1   9  140.39    4.90
  -3  -1  -9  143.09    8.30
  -3  -1  -9  135.29    4.70
  -3   1 -10   42.20    4.80
   3   1  10   51.19    2.40
  -3   1 -10   52.49    2.60
   3   1  10   46.70    2.90
  -3   1 -10   57.29    2.70
  -3   1 -10   49.80    2.50
   3   1  10   51.89    2.50
   3   1  10   52.89    2.20
  -3   1 -10   54.19    3.10
  -3   1 -10   56.09    2.60
   3  -1  10   52.59    2.20
  -3  -1 -10   52.49    2.30
   3  -1  10   51.49    2.70
   3  -1  10   54.29    2.60
  -3  -1 -10   53.09    2.50
  -3  -1 -10   53.49    2.50
   3  -1  10   56.39    3.10
  -3  -1 -10   53.99    4.30
   3  -1  10   52.59    2.60
  -3  -1 -10   51.39    2.80
  -3   1 -11    3.10    1.80
  -3   1 -11    4.70    1.00
  -3   1 -11    4.70    1.00
  -3   1 -11    5.10    1.00
   3   1  11    5.40    0.80
  -3   1 -11    4.70    1.00
   3   1  11    3.90    0.90
   3   1  11    4.00    0.80
  -3   1 -11    5.90    1.20
   3   1  11    6.50    1.20
  -3  -1 -11    5.30    1.00
   3  -1  11    3.90    0.90
   3  -1  11    5.80    1.00
  -3  -1 -11    6.60    1.10
   3  -1  11    4.30    1.00
  -3  -1 -11    5.50    0.80
  -3  -1 -11    6.70    1.70
  -3  -1 -11    4.10    0.90
   3  -1  11    6.90    1.30
   3  -1  11    5.80    0.80
  -3   1 -12   28.00    4.00
  -3   1 -12   35.20    2.60
  -3   1 -12   30.30    2.00
  -3   1 -12   28.50    2.10
   3   1  12   31.80    2.30
  -3   1 -12   28.20    2.00
   3   1  12   31.40    1.70
  -3   1 -12   31.60    2.10
   3   1  12   26.40    1.90
   3   1  12   29.60    2.00
   3  -1  12   31.50    2.10
   3  -1  12   30.00    2.10
   3  -1  12   35.10    2.10
  -3  -1 -12   32.00    1.90
   3  -1  12   31.00    1.70
  -3  -1 -12   26.80    1.80
  -3  -1 -12   28.60    1.90
  -3  -1 -12   30.20    3.40
  -3  -1 -12   33.00    2.00
   3  -1  12   33.60    2.40
  -3  -1 -12   27.80    2.20
   3   1  13   20.00    1.50
  -3   1 -13   16.50    3.70
  -3   1 -13   22.30    1.80
   3   1  13   23.90    1.90
   3   1  13   19.40    1.70
  -3   1 -13   20.60    1.80
  -3   1 -13   22.10    2.20
   3   1  13   22.10    1.80
   3   1  13   21.50    1.50
  -3   1 -13   21.70    1.80
  -3   1 -13   20.20    2.00
   3  -1  13   17.90    1.70
   3  -1  13   20.10    1.80
  -3  -1 -13   18.80    1.70
  -3  -1 -13   20.20    1.70
   3  -1  13   20.00    1.90
   3  -1  13   23.60    2.10
  -3  -1 -13   22.60    1.70
  -3  -1 -13   21.30    1.90
  -3  -1 -13   24.90    3.20
   3  -1  13   20.80    1.50
  -3  -1 -13   21.80    1.60
   3   1  14   36.30    2.30
  -3   1 -14   34.70    2.30
   3   1  14   36.40    2.00
  -3   1 -14   39.60    2.50
  -3   1 -14   29.50    4.40
   3   1  14   37.20    2.30
   3   1  14   38.10    2.50
  -3   1 -14   38.70    2.80
  -3   1 -14   39.80    2.50
  -3   1 -14   33.00    2.30
   3   1  14   35.50    2.00
  -3  -1 -14   34.10    2.30
   3  -1  14   33.30    1.90
  -3  -1 -14   38.90    4.10
  -3  -1 -14   35.00    2.20
   3  -1  14   36.90    2.70
   3  -1  14   34.50    2.40
  -3  -1 -14   35.80    2.10
   3  -1  14   35.80    2.40
   3  -1  14   37.60    2.40
  -3  -1 -14   36.20    2.60
  -3   1 -15   26.40    2.20
   3   1  15   22.70    1.90
  -3   1 -15   24.20    2.00
   3   1  15   22.40    1.90
   3   1  15   22.90    1.90
  -3   1 -15   13.50    3.60
  -3   1 -15   24.20    2.00
  -3   1 -15   29.20    2.50
  -3   1 -15   23.40    2.00
   3   1  15   22.30    1.70
   3   1  15   24.00    1.70
  -3  -1 -15   26.30    1.80
  -3  -1 -15   20.60    1.80
  -3  -1 -15   21.60    3.30
   3  -1  15   21.40    2.10
   3  -1  15   23.80    2.20
  -3  -1 -15   21.90    1.90
   3  -1  15   25.40    2.10
  -3  -1 -15   22.10    2.10
   3  -1  15   19.60    1.90
   3  -1  15   21.30    1.60
   3   1  16  128.69    4.80
   3   1  16  125.39    5.00
  -3   1 -16  102.69    9.60
  -3   1 -16  133.69    6.40
  -3   1 -16  126.79    5.30
  -3   1 -16  130.69    5.30
   3   1  16  120.39    5.10
   3   1  16  125.49    5.70
  -3   1 -16  126.29    5.30
   3  -1  16  120.59    4.70
   3  -1  16  125.19    5.40
  -3  -1 -16  130.69    9.00
  -3  -1 -16  114.19    5.90
   3  -1  16  133.69    6.20
  -3  -1 -16  126.99    4.90
  -3  -1 -16  123.19    5.10
  -3  -1 -16  131.19    5.10
   3  -1  16  125.19    5.30
   3  -1  16  124.59    5.30
  -3   1 -17   14.90    1.80
   3   1  17   20.30    1.70
   3   1  17   18.70    1.60
   3   1  17   17.00    1.90
  -3   1 -17   12.90    3.60
   3   1  17   19.90    1.90
  -3   1 -17   21.60    2.10
  -3   1 -17   14.60    1.80
  -3   1 -17   20.70    2.30
   3  -1  17   18.40    2.10
   3  -1  17   20.30    2.20
   3  -1  17   18.60    2.10
   3  -1  17   18.80    1.70
  -3  -1 -17   17.20    2.20
  -3  -1 -17   17.90    3.40
  -3  -1 -17   20.00    1.80
  -3  -1 -17   15.70    1.70
   3  -1  17   19.60    1.90
  -3   1 -18   10.40    3.30
  -3   1 -18   15.20    1.90
  -3   1 -18   17.00    2.40
   3   1  18   17.40    1.70
   3   1  18   13.80    1.60
   3   1  18   18.20    2.00
   3   1  18   17.30    1.80
  -3   1 -18   16.30    1.90
   3  -1  18   20.50    2.20
   3  -1  18   13.00    1.50
  -3  -1 -18   22.50    1.90
   3  -1  18   19.50    2.20
   3  -1  18   14.30    1.80
  -3  -1 -18   15.50    2.20
  -3  -1 -18   16.60    3.50
  -3  -1 -18   15.20    1.90
   3  -1  18   12.20    1.90
   3  -1  18   17.70    2.10
  -3   1 -19    1.30    1.20
   3   1  19    3.10    1.20
  -3   1 -19    4.90    2.60
  -3   1 -19    2.20    1.20
  -3   1 -19    5.00    1.70
   3   1  19    5.20    1.20
   3   1  19    3.70    1.00
   3   1  19    2.00    1.00
   3  -1  19    2.10    1.00
  -3  -1 -19    3.60    1.10
   3  -1  19    2.50    1.30
   3  -1  19    6.30    1.50
   3  -1  19    4.20    1.20
  -3  -1 -19    4.60    2.20
  -3  -1 -19    4.80    1.60
  -3  -1 -19    3.40    1.20
  -3   1 -20   11.70    1.80
  -3   1 -20   12.30    3.80
   3   1  20   13.40    1.70
   3   1  20    8.60    1.50
   3   1  20   10.00    1.80
  -3   1 -20   13.90    2.40
   3  -1  20   12.30    1.90
  -3  -1 -20   11.20    1.70
   3  -1  20   10.60    1.50
  -3  -1 -20   11.40    3.10
   3  -1  20   11.00    2.00
  -3   1 -21    1.10    2.50
   3   1  21    2.90    1.30
  -3   1 -21    4.00    1.50
   3   1  21    1.30    1.00
   3  -1  21    2.80    1.30
   3  -1  21    5.10    1.50
   3  -1  21    0.70    1.00
  -3  -1 -21    2.20    2.30
  -3  -1 -21    0.90    1.10
   3   1  22   18.90    2.10
  -3   1 -22   23.80    5.30
  -3   1 -22   18.50    2.30
   3   1  22   19.80    2.40
  -3  -1 -22   23.90    2.50
   3  -1  22   20.60    2.10
  -3  -1 -22   23.30    4.50
  -3   1 -23   14.20    2.20
   3   1  23   13.60    1.80
  -3   1 -23   12.50    4.30
   3   1  23   14.70    2.20
  -3  -1 -23   15.60    2.10
   3  -1  23   15.30    1.80
  -3  -1 -23   16.20    4.10
  -3   1 -24   33.90    3.20
   3   1  24   38.90    2.70
  -3   1 -24   37.50    6.70
   3  -1  24   34.00    2.60
  -3  -1 -24   39.20    5.50
  -3  -1 -24   41.40    3.20
  -3   1 -25   46.70    3.70
   3   1  25   46.40    3.10
   3  -1  25   47.00    3.10
  -3  -1 -25   47.70    6.30
  -3  -1 -25   50.59    3.50
   3   1  26   19.90    2.30
  -3   1 -26   15.70    2.50
  -3  -1 -26   16.60    2.50
   3  -1  26   12.40    1.90
  -3   1 -27   18.60    2.70
   3   1  27   23.10    2.40
   3  -1  27   17.40    2.20
   3   1  28   15.20    2.20
  -3   1 -28   11.70    2.50
   3  -1  28    8.80    1.80
  -3   1 -29   13.50    2.80
   3   1  29   14.50    2.20
   3  -1  29   17.90    2.20
  -3   1 -30   -0.70    2.40
   3   1  30    1.60    1.20
   3  -1  30    1.10    1.30
   3   1  31   30.30    2.90
  -3   1 -31   35.40    3.70
   3  -1  31   31.40    2.90
   3   1  32    1.60    1.40
   3  -1  32    0.40    1.30
   3   1  33   10.80    2.10
   3  -1  33    9.60    1.90
   3   1  34    4.50    1.70
   3  -1  34    4.40    1.60
   3   1  35    8.50    2.00
   3  -1  35   11.10    2.10
   3   1  36    0.10    1.50
   3  -1  36   -1.50    1.30
  -3   2  35    1.40    1.70
   3   2 -35    4.10    3.40
  -3   2  34   12.20    2.30
   3   2 -34   12.20    3.60
  -3   2  33    0.00    1.50
   3   2 -33   -0.90    3.10
  -3  -2  33    1.60    1.50
  -3   2  32    2.30    1.60
   3   2 -32   -1.60    2.90
  -3  -2  32    2.30    1.30
  -3   2  31    3.00    1.70
   3   2 -31   -0.20    2.50
  -3  -2  31    2.80    1.40
   3  -2 -31    3.70    1.90
   3   2 -30   12.30    2.80
  -3   2  30   14.70    2.20
  -3  -2  30   12.50    1.90
   3  -2 -30   14.50    2.50
   3   2 -29   16.20    3.00
  -3   2  29   19.50    2.50
  -3  -2  29   21.60    2.30
   3  -2 -29   21.80    2.90
   3   2 -28   54.89    4.40
  -3   2  28   56.19    3.70
  -3  -2  28   60.99    3.50
   3  -2 -28   68.99    4.30
  -3   2  27    3.80    1.50
   3   2 -27    2.60    1.90
   3  -2 -27    9.10    2.10
  -3  -2  27    5.80    1.50
   3   2 -26   13.80    2.60
  -3   2  26   15.90    2.10
  -3  -2  26   15.00    1.90
   3  -2 -26   16.90    2.40
   3   2 -25   36.10    3.50
  -3   2  25   34.80    2.70
   3  -2 -25   37.20    3.20
  -3  -2  25   34.10    2.70
   3   2 -24   12.70    4.40
   3   2 -24   12.70    2.30
  -3   2  24   12.70    1.90
   3  -2 -24   17.60    2.30
  -3  -2  24   14.50    1.80
   3   2 -23   87.59    9.70
   3   2 -23  112.69    5.60
  -3   2  23  116.69    4.90
  -3  -2  23  110.39    4.70
   3  -2 -23  111.19    5.20
   3  -2 -23   99.49    8.40
   3   2 -22   33.10    3.20
   3   2 -22   32.00    6.20
  -3   2  22   35.90    2.50
  -3  -2  22   39.60    2.50
   3  -2 -22   26.80    4.10
   3  -2 -22   41.60    2.90
   3   2 -21  482.95   16.10
  -3   2  21  489.55   15.10
  -3   2  21  496.95   16.20
   3   2 -21  392.36   27.20
  -3  -2  21  478.85   15.00
   3  -2 -21  479.65   14.70
   3  -2 -21  432.46   25.70
  -3   2  20   26.60    2.30
   3   2 -20   24.70    2.70
   3   2 -20   26.70    2.70
  -3   2  20   23.20    2.00
   3   2 -20   22.60    4.90
   3  -2 -20   27.20    2.40
  -3  -2  20   28.30    2.90
  -3  -2  20   31.50    2.10
   3  -2 -20   26.70    3.70
   3   2 -19   94.99    4.80
   3   2 -19   95.39    4.80
  -3   2  19   92.69    4.40
  -3   2  19   93.79    4.50
   3   2 -19   76.99    8.10
   3   2 -19   92.59    5.00
  -3  -2  19   90.59    4.30
  -3  -2  19   88.89    3.80
   3  -2 -19   91.99    4.30
   3  -2 -19   88.79    7.10
  -3  -2  19   95.29    5.40
  -3   2  18   15.30    1.90
   3   2 -18   17.50    2.20
   3   2 -18   14.30    3.70
   3   2 -18   15.70    2.10
  -3   2  18   13.40    1.80
   3   2 -18   16.10    2.10
  -3  -2  18   14.80    2.30
  -3  -2  18   15.30    1.50
   3  -2 -18   17.10    1.90
   3  -2 -18   15.50    2.90
  -3  -2  18   13.80    1.80
   3   2 -17  125.39    5.40
   3   2 -17  122.39    6.00
   3   2 -17  124.79    5.50
  -3   2  17  113.99    5.00
   3   2 -17  109.29    9.30
  -3   2  17  119.59    5.20
  -3  -2  17  126.09    5.00
  -3  -2  17  111.59    4.50
   3  -2 -17  115.79    8.20
   3  -2 -17  118.19    4.80
  -3  -2  17  127.79    5.90
  -3  -2  17  119.79    6.30
   3   2 -16   67.19    6.60
   3   2 -16   71.49    4.20
  -3   2  16   70.19    3.60
   3   2 -16   74.49    3.80
   3   2 -16   69.19    3.90
  -3   2  16   71.09    3.60
  -3  -2  16   73.39    4.50
   3  -2 -16   77.89    3.50
  -3  -2  16   75.19    3.10
  -3  -2  16   73.89    4.20
   3  -2 -16   75.99    5.80
  -3  -2  16   71.19    3.60
  -3   2  15   73.79    3.50
  -3   2  15   76.79    3.70
   3   2 -15   72.69    6.60
   3   2 -15   79.29    3.90
   3   2 -15   75.19    4.20
   3   2 -15   72.89    3.80
   3  -2 -15   76.09    3.70
   3  -2 -15   73.79    5.70
  -3  -2  15   76.99    3.10
  -3  -2  15   74.49    4.50
   3  -2 -15   78.79    3.50
  -3  -2  15   77.39    3.90
  -3  -2  15   81.49    3.60
  -3  -2  15   68.59    4.00
  -3   2  14  185.08    6.80
  -3   2  14  190.88    7.20
   3   2 -14  192.38    7.20
   3   2 -14  200.48    7.30
   3   2 -14  193.48    8.50
  -3   2  14  200.08    7.40
  -3   2  14  197.48    6.90
   3   2 -14  204.78    7.40
   3   2 -14  199.18   12.60
  -3  -2  14  190.38    6.50
   3  -2 -14  191.98    6.50
   3  -2 -14  197.28   11.50
   3  -2 -14  191.98    7.30
  -3  -2  14  202.18    7.30
   3  -2 -14  191.68    6.80
  -3  -2  14  196.08    7.80
  -3  -2  14  198.38    8.80
  -3  -2  14  199.78    6.80
   3   2 -13   35.40    2.40
  -3   2  13   36.70    2.00
  -3   2  13   38.70    2.30
   3   2 -13   41.50    2.50
   3   2 -13   38.20    4.10
  -3   2  13   38.20    2.30
   3   2 -13   37.80    2.50
   3   2 -13   37.00    2.70
  -3   2  13   36.00    2.20
  -3  -2  13   39.70    3.00
   3  -2 -13   38.60    2.10
  -3  -2  13   39.20    2.50
  -3  -2  13   38.20    2.50
  -3  -2  13   37.70    2.60
  -3  -2  13   35.00    1.80
   3  -2 -13   38.70    2.40
   3  -2 -13   40.20    3.50
   3  -2 -13   40.80    2.30
  -3  -2  13   39.00    2.30
  -3   2  12   45.50    2.40
   3   2 -12   50.19    2.70
   3   2 -12   46.40    3.10
   3   2 -12   54.89    2.90
   3   2 -12   46.00    2.60
  -3   2  12   47.00    2.50
  -3   2  12   44.90    2.30
  -3   2  12   47.50    2.50
   3   2 -12   50.29    4.60
   3  -2 -12   49.80    3.90
   3  -2 -12   47.30    2.60
  -3  -2  12   48.30    2.80
  -3  -2  12   44.00    2.80
  -3  -2  12   48.30    2.00
  -3  -2  12   50.79    3.30
   3  -2 -12   50.79    2.40
  -3  -2  12   50.99    2.60
  -3  -2  12   50.59    2.80
   3  -2 -12   48.30    2.40
  -3   2  11    2.30    0.60
  -3   2  11    1.40    0.70
  -3   2  11    3.00    0.60
  -3   2  11    4.50    0.90
   3   2 -11    2.90    1.10
  -3   2  11    1.50    0.70
   3   2 -11    3.80    1.60
   3   2 -11    2.60    0.80
   3   2 -11    1.40    0.70
   3   2 -11    2.20    0.90
   3   2 -11    1.50    0.80
   3  -2 -11    1.80    0.60
   3  -2 -11    1.70    0.90
  -3  -2  11    2.60    1.00
   3  -2 -11    3.30    0.70
  -3  -2  11    2.20    0.80
  -3  -2  11    1.60    0.80
  -3  -2  11    2.60    0.80
   3  -2 -11    2.30    0.80
  -3  -2  11    2.90    1.20
   3   2 -10  205.48    7.40
  -3   2  10  189.28    6.90
  -3   2  10  190.88    7.30
   3   2 -10  191.08    6.70
   3   2 -10  194.18    6.50
   3   2 -10  198.98   11.60
  -3   2  10  202.78    7.20
   3   2 -10  191.88    8.30
   3   2 -10  189.18    6.70
  -3   2  10  199.98    6.40
  -3   2  10  186.98    6.30
  -3   2  10  212.08   11.00
   3  -2 -10  199.08    7.00
  -3  -2  10  186.78    6.70
  -3  -2  10  184.18    7.30
  -3  -2  10  196.88    8.50
  -3  -2  10  195.98    6.70
   3  -2 -10  188.08   10.80
   3  -2 -10  184.48    6.00
   3  -2 -10  193.98    6.30
  -3   2   9   87.39    3.80
   3   2  -9   91.29    3.70
   3   2  -9   91.39    3.80
  -3   2   9   91.09    3.40
   3   2  -9   87.89    4.60
  -3   2   9   91.29    3.60
   3   2  -9   96.99    4.10
  -3   2   9   88.89    3.40
   3   2  -9   89.19    6.30
  -3   2   9   90.39    3.70
  -3   2   9  101.79    5.80
   3  -2  -9   91.59    3.40
   3  -2  -9   93.39    3.30
   3  -2  -9   94.09    3.80
  -3  -2   9   91.19    3.80
  -3  -2   9   90.79    3.80
   3  -2  -9   92.59    3.60
  -3  -2   9   84.49    4.00
   3  -2  -9   89.89    3.40
  -3  -2   9   88.89    4.70
   3   2  -8  126.69    4.60
  -3   2   8  124.69    5.00
   3   2  -8  138.39    5.20
  -3   2   8  129.99    4.30
   3   2  -8  126.69    4.70
  -3   2   8  120.69    4.70
   3   2  -8  118.69    5.80
  -3   2   8  129.49    4.30
  -3   2   8  134.89    7.40
   3   2  -8  132.19    8.10
  -3  -2   8  125.79    5.90
  -3  -2   8  128.39    4.70
   3  -2  -8  127.99    4.80
  -3  -2   8  126.09    4.70
  -3  -2   8  120.49    5.10
  -3  -2   8  124.49    4.60
   3  -2  -8  127.39    4.10
   3  -2  -8  127.09    4.30
   3  -2  -8  124.49    4.20
   3  -2  -8  131.39    4.60
   3   2  -7   81.39    4.20
   3   2  -7   80.39    3.30
  -3   2   7   81.29    3.00
  -3   2   7   85.89    3.00
   3   2  -7   86.99    3.70
  -3   2   7   80.89    3.60
   3   2  -7   81.19    5.80
   3   2  -7   86.99    3.30
  -3   2   7   81.09    3.40
  -3   2   7   88.69    5.20
  -3  -2   7   83.89    3.70
  -3  -2   7   83.69    3.30
  -3  -2   7   86.59    3.40
   3  -2  -7   83.99    2.90
   3  -2  -7   86.89    3.00
  -3  -2   7   85.09    4.40
   3  -2  -7   82.59    3.30
   3  -2  -7   87.99    3.50
   3   2  -6  107.99    4.20
  -3   2   6  104.89    5.90
  -3   2   6   99.99    3.30
   3   2  -6   95.19    4.70
   3   2  -6   97.39    6.50
  -3   2   6   95.89    3.80
   3   2  -6   96.19    3.70
  -3   2   6  102.89    3.30
   3   2  -6   96.79    3.70
  -3   2   6   98.49    4.20
  -3  -2   6  102.79    4.90
   3  -2  -6   96.09    3.20
  -3  -2   6   98.59    3.70
   3  -2  -6   99.29    3.30
   3  -2  -6  104.69    4.00
   3  -2  -6   99.19    3.70
  -3  -2   6   96.09    3.60
  -3  -2   6   98.39    4.10
  -3   2   5  221.88    7.70
   3   2  -5  233.08    7.90
   3   2  -5  225.08    7.20
  -3   2   5  232.48    6.70
  -3   2   5  230.38    6.70
   3   2  -5  211.88    9.20
   3   2  -5  226.28   12.80
  -3   2   5  219.38    8.60
   3   2  -5  237.08    7.20
   3  -2  -5  228.98    6.70
  -3  -2   5  228.88    9.30
   3  -2  -5  242.28    7.80
   3  -2  -5  235.98    8.70
  -3  -2   5  221.28    7.90
   3  -2  -5  222.68    7.20
   3  -2  -5  231.78    6.70
  -3  -2   5  225.98    7.20
  -3  -2   5  234.88    7.20
  -3   2   4 1278.67   39.80
   3   2  -4 1312.07   36.50
   3   2  -4 1313.57   64.59
   3   2  -4 1322.47   36.50
  -3   2   4 1248.98   45.90
  -3   2   4 1335.67   36.00
  -3   2   4 1323.17   36.10
   3   2  -4 1328.07   39.90
   3   2  -4 1302.27   37.80
   3   2  -4 1255.77   46.40
  -3  -2   4 1215.88   36.40
   3  -2  -4 1345.17   36.10
  -3  -2   4 1301.07   39.90
   3  -2  -4 1341.77   45.90
  -3  -2   4 1330.77   46.50
  -3  -2   4 1334.77   37.80
  -3  -2   4 1299.47   36.50
   3  -2  -4 1341.77   36.00
   3  -2  -4 1311.07   36.80
   3   2  -3 1231.58   35.10
   3   2  -3 1220.68   33.80
  -3   2   3 1240.88   33.30
  -3   2   3 1228.38   33.30
  -3   2   3 1157.98   42.60
   3   2  -3 1173.08   43.10
   3   2  -3 1236.58   59.99
   3   2  -3 1210.58   33.80
  -3   2   3 1208.48   36.90
   3   2  -3 1241.08   37.00
  -3   2   3 1173.18   36.90
   3  -2  -3 1238.48   33.30
  -3  -2   3 1206.28   33.80
   3  -2  -3 1213.78   33.30
  -3  -2   3 1230.58   35.00
   3  -2  -3 1220.18   34.20
  -3  -2   3 1193.78   33.80
  -3  -2   3 1176.58   33.80
  -3  -2   3 1189.48   37.00
   3  -2  -3 1229.28   42.70
  -3  -2   3 1231.38   43.20
  -3   2   2  192.38    5.50
   3   2  -2  195.58    6.60
   3   2  -2  180.78    7.90
   3   2  -2  195.38    5.90
  -3   2   2  192.98    6.60
   3   2  -2  194.18    6.10
   3   2  -2  195.28    5.90
  -3   2   2  181.28    7.50
  -3   2   2  198.48    5.50
   3   2  -2  187.78   10.90
  -3   2   2  191.18   10.40
  -3  -2   2  193.78    5.90
   3  -2  -2  190.98    6.20
  -3  -2   2  194.28    5.90
   3  -2  -2  188.98    5.40
   3  -2  -2  192.88    5.40
  -3  -2   2  194.78    5.90
   3  -2  -2  192.28    7.60
  -3  -2   2  189.18    6.60
   3   2  -1  110.19    6.80
  -3   2   1  108.79    3.20
  -3   2   1  112.69    4.10
   3   2  -1  102.39    3.50
  -3   2   1  106.69    6.30
   3   2  -1  107.09    3.50
  -3   2   1  107.29    3.10
   3   2  -1  103.39    4.90
   3   2  -1  111.59    4.00
   3   2  -1  107.49    3.50
  -3   2   1  102.69    4.60
   3   2  -1  106.29    3.60
  -3  -2   1  111.09    4.00
  -3  -2   1  101.59    3.40
   3  -2  -1  108.89    4.70
   3  -2  -1  108.99    3.10
  -3  -2   1  107.49    3.50
   3  -2  -1  106.39    3.10
  -3  -2   1  108.79    3.50
   3  -2  -1  107.99    3.80
  -3   2   0  429.66   16.40
   3   2   0  464.25   14.00
  -3   2   0  460.15   14.30
  -3   2   0  445.96   12.80
  -3   2   0  448.96   12.40
   3   2   0  445.96   12.70
   3   2   0  431.66   12.70
   3   2   0  443.76   13.10
  -3   2   0  444.56   22.70
  -3   2   0  443.36   12.40
   3  -2   0  453.25   12.40
  -3  -2   0  435.86   12.60
   3  -2   0  441.66   14.20
   3  -2   0  432.06   12.40
   3  -2   0  454.85   16.50
  -3  -2   0  446.26   12.70
  -3  -2   0  455.85   14.00
   3  -2   0  457.45   22.70
  -3   2  -1  107.79    6.40
   3   2   1  102.69    3.40
   3   2   1  104.39    3.50
  -3   2  -1  107.49    3.30
   3   2   1  109.19    3.80
  -3   2  -1  104.39    3.30
  -3   2  -1  105.79    4.10
  -3   2  -1  107.59    3.30
   3   2   1  108.49    3.40
  -3   2  -1  100.49    4.70
  -3  -2  -1  100.79    3.30
   3  -2   1  107.29    4.80
   3  -2   1  108.59    3.30
  -3  -2  -1  109.59    3.80
   3  -2   1  105.39    4.10
  -3  -2  -1  106.19    3.40
   3  -2   1  102.69    3.20
   3  -2   1  108.19    6.40
  -3   2  -2  189.58    7.80
  -3   2  -2  190.68    5.70
   3   2   2  192.68    5.70
   3   2   2  190.48    5.70
   3   2   2  195.18    6.30
  -3   2  -2  192.38   10.60
  -3   2  -2  188.48    5.70
  -3   2  -2  197.98    6.80
   3  -2   2  199.38    5.80
  -3  -2  -2  193.08    6.30
   3  -2   2  195.58    5.60
  -3  -2  -2  189.68    5.70
   3  -2   2  189.08    5.70
   3  -2   2  183.58    6.70
  -3  -2  -2  187.78    5.70
   3  -2   2  180.28    7.80
   3  -2   2  195.98   10.60
  -3   2  -3 1189.68   33.60
  -3   2  -3 1227.68   37.00
   3   2   3 1210.38   33.50
  -3   2  -3 1136.79   42.80
  -3   2  -3 1233.38   59.49
   3   2   3 1200.98   33.50
   3   2   3 1203.08   36.40
  -3   2  -3 1212.58   33.60
   3  -2   3 1252.27   59.59
  -3  -2  -3 1201.98   36.40
  -3  -2  -3 1231.58   33.50
  -3  -2  -3 1195.18   33.50
   3  -2   3 1198.18   33.50
   3  -2   3 1251.27   34.70
   3  -2   3 1210.18   33.60
   3  -2   3 1206.18   37.00
   3  -2   3 1191.88   43.00
  -3   2  -4 1312.77   36.50
  -3   2  -4 1333.97   64.59
   3   2   4 1290.27   39.40
   3   2   4 1317.77   36.40
  -3   2  -4 1329.17   40.20
  -3   2  -4 1302.07   36.50
   3   2   4 1302.67   36.40
  -3   2  -4 1229.98   46.50
   3  -2   4 1317.97   36.60
  -3  -2  -4 1336.17   36.40
   3  -2   4 1346.27   46.80
   3  -2   4 1318.37   36.50
  -3  -2  -4 1309.57   36.30
   3  -2   4 1277.87   40.20
   3  -2   4 1371.16   64.69
   3   2   5  225.78    6.80
  -3   2  -5  225.88    7.00
   3   2   5  224.98    7.20
  -3   2  -5  225.38    7.00
  -3   2  -5  207.78    9.00
   3   2   5  232.98    6.80
  -3   2  -5  225.38    7.90
   3   2   5  219.58    7.10
  -3   2  -5  243.28   12.60
   3  -2   5  227.28    7.00
   3  -2   5  236.28    9.40
  -3  -2  -5  232.58    6.80
   3  -2   5  220.18    7.90
  -3  -2  -5  224.78    6.80
   3  -2   5  224.38    7.00
  -3   2  -6   92.69    4.60
   3   2   6   98.49    3.30
   3   2   6   96.99    3.30
   3   2   6   98.09    3.30
  -3   2  -6   99.79    3.60
   3   2   6  101.09    4.30
  -3   2  -6   99.19    4.10
   3   2   6   96.59    3.30
  -3   2  -6   97.09    3.50
  -3   2  -6  108.19    6.60
  -3  -2  -6  100.19    3.30
   3  -2   6   96.99    3.50
   3  -2   6   93.99    4.00
   3  -2   6   82.69    3.50
  -3  -2  -6   96.99    3.30
   3  -2   6   99.59    4.90
   3   2   7   82.99    3.80
   3   2   7   84.19    3.00
   3   2   7   80.69    3.00
  -3   2  -7   80.49    4.20
  -3   2  -7   86.59    3.30
   3   2   7   82.59    2.90
  -3   2  -7   81.09    3.20
  -3   2  -7   84.29    3.70
  -3   2  -7   92.09    6.10
  -3  -2  -7   83.79    3.00
   3  -2   7   80.09    3.20
   3  -2   7   78.19    3.60
  -3  -2  -7   84.29    3.00
   3  -2   7   79.69    4.30
   3   2   8  126.09    4.30
  -3   2  -8  125.69    4.50
  -3   2  -8  117.09    5.70
   3   2   8  121.49    4.20
   3   2   8  122.39    4.20
  -3   2  -8  130.09    5.00
  -3   2  -8  129.69    8.30
   3   2   8  122.49    5.30
  -3   2  -8  122.99    4.50
  -3  -2  -8  126.59    4.20
  -3  -2  -8  131.59    4.30
   3  -2   8  120.79    4.40
  -3  -2  -8  124.39    4.10
  -3  -2  -8  120.59    4.20
   3  -2   8  130.59    6.00
   3  -2   8  119.69    5.00
   3   2   9   87.79    3.40
  -3   2  -9   88.59    4.60
   3   2   9   92.39    4.20
   3   2   9   92.09    3.20
   3   2   9   90.59    3.40
  -3   2  -9   94.19    4.00
  -3   2  -9   90.19    6.70
  -3   2  -9   94.19    3.70
  -3   2  -9   87.39    3.60
  -3  -2  -9   92.19    3.40
   3  -2   9   89.79    3.60
  -3  -2  -9   84.49    3.20
   3  -2   9   83.29    4.00
   3  -2   9   89.29    4.80
   3  -2   9   88.29    3.70
  -3  -2  -9   88.39    6.10
  -3  -2  -9   90.39    3.20
  -3  -2  -9   96.69    3.50
   3   2  10  184.88    6.30
   3   2  10  194.98    7.80
  -3   2 -10  184.58    6.50
   3   2  10  196.68    6.30
   3   2  10  191.28    6.30
  -3   2 -10  191.98    6.60
  -3   2 -10  188.08    8.20
  -3   2 -10  185.08   12.00
  -3   2 -10  191.18    7.10
   3  -2  10  202.58    8.60
  -3  -2 -10  195.28    6.30
   3  -2  10  188.98    6.60
  -3  -2 -10  190.78    6.30
   3  -2  10  189.88    6.20
  -3  -2 -10  186.68   11.10
   3  -2  10  189.98    7.20
   3  -2  10  193.68    6.50
  -3  -2 -10  182.38    6.00
  -3   2 -11    2.50    0.80
  -3   2 -11    1.10    0.90
  -3   2 -11    2.10    1.70
  -3   2 -11    3.20    1.00
   3   2  11    2.80    0.80
   3   2  11    1.70    0.80
  -3   2 -11    1.70    0.80
   3   2  11    1.90    0.50
   3   2  11    1.00    0.70
  -3   2 -11    2.00    0.90
  -3  -2 -11    2.00    1.20
  -3  -2 -11    1.00    0.60
  -3  -2 -11    3.40    0.60
  -3  -2 -11    1.00    0.70
   3  -2  11    2.30    0.80
   3  -2  11    1.90    0.80
   3  -2  11    3.20    1.00
   3  -2  11    2.50    1.10
   3  -2  11    1.90    0.80
   3   2  12   42.30    2.30
   3   2  12   49.80    2.90
  -3   2 -12   48.50    3.20
   3   2  12   48.40    2.50
   3   2  12   46.70    2.10
  -3   2 -12   50.89    2.80
  -3   2 -12   41.80    4.80
  -3   2 -12   46.40    2.60
  -3   2 -12   51.29    2.70
   3  -2  12   50.99    2.70
   3  -2  12   49.50    2.50
  -3  -2 -12   40.90    2.30
   3  -2  12   44.50    2.60
  -3  -2 -12   49.20    2.20
  -3  -2 -12   47.40    4.20
  -3  -2 -12   47.10    2.40
   3  -2  12   50.99    3.40
   3  -2  12   45.60    2.80
   3   2  13   37.40    2.20
   3   2  13   39.30    2.20
  -3   2 -13   36.00    2.50
  -3   2 -13   31.60    4.40
  -3   2 -13   36.40    2.40
   3   2  13   34.70    2.60
  -3   2 -13   38.80    2.50
   3   2  13   40.40    2.00
  -3   2 -13   36.00    2.80
   3  -2  13   35.40    2.40
  -3  -2 -13   40.20    3.90
   3  -2  13   36.90    2.60
   3  -2  13   35.60    1.70
   3  -2  13   38.50    2.30
  -3  -2 -13   41.50    2.00
   3  -2  13   40.60    3.10
  -3  -2 -13   35.70    2.10
  -3   2 -14  180.78    6.90
   3   2  14  188.98    6.80
   3   2  14  189.28    6.70
  -3   2 -14  190.68    7.00
  -3   2 -14  161.58   12.70
   3   2  14  175.78    8.30
  -3   2 -14  197.28    8.60
   3   2  14  195.58    6.70
  -3   2 -14  195.98    7.30
   3  -2  14  196.18    8.90
   3  -2  14  197.08    6.60
  -3  -2 -14  193.68    6.50
   3  -2  14  198.18    6.20
   3  -2  14  195.78    7.70
  -3  -2 -14  191.18    7.90
  -3  -2 -14  208.28    6.70
  -3  -2 -14  192.88   11.80
   3  -2  14  198.28    7.20
   3   2  15   77.69    3.30
   3   2  15   72.99    3.50
   3   2  15   64.19    4.00
  -3   2 -15   76.29    3.80
  -3   2 -15   76.89    3.90
  -3   2 -15   57.59    6.60
  -3   2 -15   72.69    4.40
   3  -2  15   78.89    3.00
  -3  -2 -15   73.89    3.90
  -3  -2 -15   72.79    3.30
   3  -2  15   78.69    4.10
  -3  -2 -15   69.09    5.90
   3  -2  15   79.69    4.70
   3  -2  15   80.79    3.60
  -3  -2 -15   80.99    3.30
   3  -2  15   80.89    3.90
   3   2  16   71.49    4.20
  -3   2 -16   61.59    7.00
   3   2  16   71.29    3.20
  -3   2 -16   73.89    3.90
   3   2  16   71.59    3.60
  -3   2 -16   74.59    3.80
   3   2  16   75.99    3.30
  -3   2 -16   75.39    4.60
   3  -2  16   76.39    3.00
  -3  -2 -16   76.19    3.90
   3  -2  16   71.69    4.00
   3  -2  16   77.49    3.60
   3  -2  16   79.59    4.70
  -3  -2 -16   70.09    6.10
  -3  -2 -16   83.69    3.60
  -3  -2 -16   71.19    3.30
   3  -2  16   71.99    3.00
  -3   2 -17   95.39    9.40
   3   2  17  118.69    4.60
  -3   2 -17  119.19    5.40
   3   2  17  119.99    5.80
  -3   2 -17  110.99    5.20
   3   2  17  114.19    5.00
   3  -2  17  123.59    5.00
   3  -2  17  123.79    6.40
   3  -2  17  122.49    5.70
   3  -2  17  119.39    4.40
  -3  -2 -17  119.49    8.60
  -3  -2 -17  121.79    5.60
  -3  -2 -17  122.69    4.80
   3  -2  17  117.99    4.40
  -3   2 -18   18.10    2.10
  -3   2 -18    9.40    3.30
   3   2  18   18.50    2.00
   3   2  18   17.20    1.60
  -3   2 -18   14.60    2.00
  -3  -2 -18   13.80    3.00
   3  -2  18   19.00    1.50
   3  -2  18   15.10    1.90
  -3  -2 -18   12.70    1.70
   3  -2  18   14.50    2.10
   3  -2  18   14.90    1.40
   3   2  19   96.69    4.50
  -3   2 -19   94.49    4.70
   3   2  19   91.79    4.00
  -3   2 -19   94.79    4.70
  -3   2 -19   71.99    8.40
   3  -2  19   99.29    5.10
  -3  -2 -19   88.09    7.50
  -3  -2 -19   88.39    4.20
   3  -2  19   95.99    4.30
   3  -2  19   95.09    3.80
   3  -2  19   93.49    3.80
  -3   2 -20   34.60    2.80
  -3   2 -20   25.40    2.70
   3   2  20   34.60    2.30
   3   2  20   31.00    2.60
  -3   2 -20   21.50    5.10
  -3  -2 -20   23.30    4.20
   3  -2  20   25.90    2.00
  -3  -2 -20   35.10    2.60
   3  -2  20   42.30    2.90
   3  -2  20   25.30    1.90
   3   2  21  471.95   15.50
  -3   2 -21  490.45   16.40
  -3   2 -21  487.95   16.00
  -3  -2 -21  449.46   27.10
   3  -2  21  506.65   15.30
   3  -2  21  497.25   15.30
  -3  -2 -21  463.45   15.00
  -3   2 -22   38.50    3.10
  -3   2 -22   22.50    5.50
   3   2  22   43.80    2.70
   3  -2  22   33.40    2.30
  -3  -2 -22   31.80    4.80
  -3  -2 -22   40.50    2.90
  -3   2 -23   82.79    9.80
   3   2  23  113.29    4.90
  -3   2 -23  114.49    5.60
  -3  -2 -23  116.79    5.30
  -3  -2 -23  102.79    9.00
   3  -2  23  110.69    4.70
   3   2  24   13.40    1.90
  -3   2 -24   12.40    2.20
  -3  -2 -24   15.60    2.20
   3  -2  24   11.80    1.60
  -3  -2 -24   12.90    3.70
  -3   2 -25   33.70    3.30
   3   2  25   35.80    2.70
  -3  -2 -25   35.40    3.30
   3  -2  25   31.30    2.50
   3   2  26   18.20    2.20
  -3   2 -26   20.50    2.70
  -3  -2 -26   20.10    2.60
   3  -2  26   19.40    2.10
   3  -2  26   13.50    1.80
   3   2  27    6.10    1.50
  -3   2 -27    0.80    1.70
   3  -2  27    4.00    1.40
  -3  -2 -27    7.00    1.90
   3  -2  27    5.20    1.40
   3   2  28   55.49    3.60
  -3   2 -28   60.09    4.40
  -3  -2 -28   62.59    4.20
   3  -2  28   62.79    3.50
   3  -2  28   61.09    3.50
  -3   2 -29   20.00    3.10
   3   2  29   13.90    2.10
   3  -2  29   26.00    2.30
   3  -2  29   19.30    2.20
  -3  -2 -29   20.90    2.80
   3   2  30   10.80    2.00
  -3   2 -30   13.10    2.80
  -3  -2 -30   16.80    2.60
   3  -2  30   13.90    1.90
   3  -2  30   11.50    1.80
   3   2  31    0.60    1.50
  -3   2 -31    2.00    2.50
   3  -2  31    2.30    1.40
   3   2  32   -0.80    1.40
  -3   2 -32    2.40    3.00
   3   2  33    0.60    1.60
  -3   2 -33    2.60    3.20
   3   2  34   13.60    2.30
  -3   2 -34   13.70    3.60
  -3   2 -35    4.20    3.60
   3   2  35    0.90    1.70
  -3   3  34    0.80    1.60
   3   3 -34   -2.10    3.20
   3  -3 -34    3.50    1.90
   3   3 -33   49.40    5.00
   3  -3 -33   58.79    4.50
   3   3 -32   -0.50    2.70
   3  -3 -32    1.60    1.80
   3   3 -31   62.39    5.10
   3  -3 -31   59.69    4.40
   3   3 -30    1.60    2.20
   3  -3 -30    2.00    1.70
   3   3 -29   50.69    4.40
   3  -3 -29   60.79    4.20
   3   3 -28    2.90    2.00
   3  -3 -28    2.20    1.60
   3   3 -27   47.90    4.10
   3  -3 -27   48.40    3.60
   3   3 -26   69.69    4.70
   3  -3 -26   74.49    4.30
   3   3 -25   38.20    3.60
   3  -3 -25   46.80    3.40
   3   3 -24   41.40    3.70
   3  -3 -24   49.60    3.50
   3   3 -23    5.80    1.90
   3  -3 -23    6.40    1.70
   3   3 -22   -1.20    1.30
   3  -3 -22   -0.50    1.20
   3   3 -21   37.30    3.20
   3   3 -21   27.10    5.50
   3   3 -21   29.60    3.10
  -3  -3  21   30.30    2.90
   3  -3 -21   30.20    2.60
   3   3 -20    0.70    2.30
   3   3 -20   -0.10    1.20
   3   3 -20    0.80    1.30
   3  -3 -20    1.50    1.50
   3  -3 -20   -1.40    0.90
  -3  -3  20   -0.30    1.30
   3   3 -19   47.80    3.50
   3   3 -19   42.70    5.80
   3   3 -19   49.20    3.40
   3  -3 -19   48.30    3.10
  -3  -3  19   58.19    3.40
   3  -3 -19   49.80    5.00
   3   3 -18   97.99    5.00
   3   3 -18   97.69    8.60
  -3   3  18   97.29    4.60
   3   3 -18   99.39    4.90
  -3  -3  18   98.29    4.60
   3  -3 -18   97.59    7.40
   3  -3 -18   95.89    4.40
  -3   3  17   12.20    1.60
   3   3 -17   10.50    3.20
   3   3 -17    9.90    1.80
   3   3 -17    6.50    1.60
  -3  -3  17   11.10    1.80
   3  -3 -17    9.50    1.50
   3   3 -16  175.48    6.90
  -3   3  16  170.48    6.30
  -3   3  16  167.18    6.70
   3   3 -16  174.08    6.90
   3   3 -16  168.08   11.80
   3  -3 -16  165.48    6.10
  -3  -3  16  169.18    6.40
   3   3 -15  505.75   16.60
   3   3 -15  496.45   16.10
  -3   3  15  492.45   15.50
   3   3 -15  513.95   28.20
  -3   3  15  494.65   16.70
  -3  -3  15  517.55   17.80
  -3  -3  15  537.05   20.50
   3  -3 -15  512.25   15.00
  -3  -3  15  517.85   15.40
   3   3 -14  171.88    6.70
  -3   3  14  167.38    6.10
   3   3 -14  175.38    6.50
  -3   3  14  169.38    6.60
   3   3 -14  178.98   11.70
   3  -3 -14  176.98    6.00
  -3  -3  14  177.58    8.60
  -3  -3  14  164.18    7.30
   3  -3 -14  184.58    6.90
  -3  -3  14  174.78    6.30
   3   3 -13   76.59    3.90
  -3   3  13   80.49    3.80
   3   3 -13   82.19    3.60
   3   3 -13   87.39    6.90
  -3   3  13   75.89    3.40
  -3  -3  13   80.99    3.90
   3  -3 -13   78.79    3.30
  -3  -3  13   80.89    3.70
   3  -3 -13   90.49    4.00
  -3  -3  13   82.59    5.10
  -3  -3  13   87.49    4.50
  -3   3  12   44.70    2.30
   3   3 -12   47.30    4.70
   3   3 -12   44.10    2.30
  -3   3  12   50.59    2.50
  -3   3  12   46.20    2.60
   3   3 -12   47.40    2.70
   3   3 -12   43.40    3.40
  -3   3  12   49.30    2.40
  -3   3  12   48.10    2.60
  -3  -3  12   48.80    3.60
   3  -3 -12   50.69    2.40
   3  -3 -12   43.70    2.30
   3  -3 -12   47.60    2.80
  -3  -3  12   48.20    3.20
  -3  -3  12   46.00    2.70
  -3  -3  12   47.80    2.60
   3   3 -11  307.77   10.20
  -3   3  11  310.17   10.60
   3   3 -11  303.47   10.20
   3   3 -11  301.27   12.90
   3   3 -11  318.07    9.90
   3   3 -11  294.67   17.70
  -3   3  11  331.77    9.70
  -3   3  11  314.87   11.90
  -3   3  11  306.97    9.60
  -3  -3  11  313.57   13.20
   3  -3 -11  303.57   10.10
  -3  -3  11  323.97    9.80
  -3  -3  11  294.27   11.20
   3  -3 -11  324.07   10.80
   3  -3 -11  316.97    9.60
  -3  -3  11  319.17   10.40
   3  -3 -11  312.17    9.30
   3   3 -10   11.90    1.40
  -3   3  10   13.60    1.10
   3   3 -10   13.30    1.50
  -3   3  10   12.70    1.10
  -3   3  10   14.10    1.50
  -3   3  10   12.50    1.40
   3   3 -10   13.60    2.70
   3   3 -10   14.30    2.10
   3  -3 -10   11.90    1.10
  -3  -3  10   13.70    2.20
  -3  -3  10   15.10    1.40
  -3  -3  10   13.50    1.80
   3  -3 -10   13.80    1.60
  -3  -3  10   11.80    1.40
   3  -3 -10   12.80    1.10
   3  -3 -10   11.70    1.40
  -3   3   9  364.76   12.20
   3   3  -9  368.66   11.50
  -3   3   9  381.06   10.90
   3   3  -9  353.86   20.20
   3   3  -9  351.96   14.70
  -3   3   9  365.66   13.80
  -3   3   9  357.66   10.80
   3   3  -9  364.46   11.50
  -3  -3   9  376.16   15.00
   3  -3  -9  380.86   11.60
   3  -3  -9  376.56   10.80
  -3  -3   9  365.56   10.90
  -3  -3   9  348.97   12.70
  -3  -3   9  366.86   11.60
   3  -3  -9  373.06   10.50
   3   3  -8  300.77   17.10
  -3   3   8  296.57   11.60
   3   3  -8  301.57    9.70
  -3   3   8  301.77   10.20
   3   3  -8  297.57    9.60
   3   3  -8  289.67   12.40
  -3   3   8  312.57    9.00
  -3   3   8  307.87    9.00
  -3  -3   8  313.97    9.70
   3  -3  -8  308.67    8.90
  -3  -3   8  312.67   12.70
  -3  -3   8  299.87    9.70
   3  -3  -8  297.67    9.60
  -3  -3   8  298.27   10.70
   3  -3  -8  308.97    8.60
  -3  -3   8  294.07    9.10
   3   3  -7  295.67    9.50
  -3   3   7  311.97    8.90
  -3   3   7  312.07    8.90
   3   3  -7  292.67   12.50
   3   3  -7  319.77   10.70
  -3   3   7  294.77   10.20
  -3   3   7  306.47   11.70
   3   3  -7  307.27    9.60
   3   3  -7  301.37   17.10
   3  -3  -7  292.07    9.60
   3  -3  -7  311.77    8.50
  -3  -3   7  312.27    9.60
  -3  -3   7  295.17   10.60
  -3  -3   7  297.27    9.60
   3  -3  -7  309.67    8.80
  -3  -3   7  294.77    9.00
  -3  -3   7  303.77   12.60
   3   3  -6  151.88    5.30
   3   3  -6  142.09    7.00
  -3   3   6  153.18    6.50
   3   3  -6  143.19    9.60
  -3   3   6  150.28    4.60
  -3   3   6  149.88    5.70
  -3   3   6  157.68    5.70
   3   3  -6  151.98    5.20
   3   3  -6  156.18    6.00
  -3   3   6  152.78    4.60
  -3  -3   6  152.88    5.10
  -3  -3   6  147.49    7.20
   3  -3  -6  148.89    4.40
   3  -3  -6  150.28    5.40
   3  -3  -6  150.38    4.50
   3  -3  -6  157.48    4.50
  -3  -3   6  158.98    5.30
  -3  -3   6  145.59    4.90
  -3  -3   6  147.79    6.00
  -3   3   5  491.55   16.20
   3   3  -5  490.85   19.30
   3   3  -5  499.85   14.70
  -3   3   5  487.75   18.70
  -3   3   5  504.05   14.10
   3   3  -5  519.65   14.90
   3   3  -5  500.15   26.70
  -3   3   5  508.25   16.20
  -3   3   5  507.85   14.10
   3   3  -5  515.35   16.40
  -3  -3   5  512.75   19.50
  -3  -3   5  497.65   15.00
  -3  -3   5  518.65   14.80
   3  -3  -5  501.45   13.50
  -3  -3   5  491.35   16.40
  -3  -3   5  509.15   14.80
  -3  -3   5  493.65   14.10
   3  -3  -5  515.15   18.70
   3  -3  -5  499.75   15.00
   3   3  -4   66.59    2.70
  -3   3   4   70.29    3.10
   3   3  -4   70.69    2.70
  -3   3   4   62.79    3.10
  -3   3   4   61.29    3.40
   3   3  -4   63.39    3.90
   3   3  -4   72.79    3.20
   3   3  -4   65.29    2.60
   3   3  -4   67.89    5.40
   3  -3  -4   65.49    2.90
  -3  -3   4   67.19    2.70
  -3  -3   4   65.89    2.60
   3  -3  -4   67.29    3.50
  -3  -3   4   60.79    2.60
  -3  -3   4   61.99    2.50
  -3  -3   4   66.19    4.00
  -3  -3   4   65.89    2.50
  -3  -3   4   61.99    3.10
  -3   3   3  114.19    4.60
   3   3  -3  110.09    5.60
   3   3  -3  118.19    4.00
   3   3  -3  120.89    4.60
   3   3  -3  113.59    3.90
   3   3  -3  108.69    7.70
  -3   3   3  111.49    5.30
   3   3  -3  116.59    3.90
  -3   3   3  108.69    7.20
  -3  -3   3  115.49    3.70
  -3  -3   3  113.49    3.90
   3  -3  -3  115.19    4.30
  -3  -3   3  111.29    3.90
  -3  -3   3  118.89    5.80
  -3  -3   3  113.39    3.70
   3  -3  -3  114.59    5.30
  -3  -3   3  111.59    4.60
   3   3  -2  162.48    5.20
  -3   3   2  165.88    6.00
   3   3  -2  160.78    5.90
   3   3  -2  154.68    9.90
  -3   3   2  154.78    9.40
  -3   3   2  154.58    6.90
   3   3  -2  163.48    5.10
   3   3  -2  155.28    7.20
   3   3  -2  159.28    5.00
   3  -3  -2  159.98    6.90
   3  -3  -2  162.08    5.50
  -3  -3   2  155.08    5.90
  -3  -3   2  166.28    5.10
  -3  -3   2  150.38    5.00
  -3  -3   2  153.38    4.80
   3   3  -1   45.10    1.90
  -3   3   1   42.00    3.80
   3   3  -1   47.50    4.20
   3   3  -1   46.40    1.90
   3   3  -1   42.80    3.00
   3   3  -1   46.80    1.90
  -3   3   1   45.50    2.50
  -3   3   1   44.10    2.90
   3   3  -1   46.30    2.30
   3  -3  -1   49.10    2.50
  -3  -3   1   48.00    1.90
  -3  -3   1   46.60    2.00
   3  -3  -1   49.10    2.40
  -3  -3   1   44.60    1.80
  -3  -3   1   45.20    2.40
  -3  -3   1   45.90    1.80
   3  -3  -1   46.60    3.00
  -3   3   0   49.80    3.10
   3   3   0   46.60    3.10
  -3   3   0   49.20    1.60
  -3   3   0   48.00    1.60
   3   3   0   50.29    2.40
   3   3   0   49.50    1.90
  -3   3   0   44.70    2.50
   3   3   0   48.30    1.90
  -3   3   0   46.30    4.00
   3   3   0   48.60    1.90
   3  -3   0   45.20    2.50
  -3  -3   0   49.50    2.00
   3  -3   0   49.20    2.40
  -3  -3   0   46.30    1.80
  -3  -3   0   50.69    1.90
  -3  -3   0   49.70    1.90
  -3  -3   0   50.49    2.40
   3  -3   0   49.10    3.10
   3   3   1   48.40    2.30
  -3   3  -1   48.30    2.60
   3   3   1   46.20    3.00
  -3   3  -1   45.80    1.70
  -3   3  -1   42.90    2.90
   3   3   1   45.90    1.80
  -3   3  -1   47.20    4.00
   3   3   1   46.30    1.80
  -3   3  -1   47.10    1.70
   3   3   1   45.60    1.80
   3  -3   1   44.20    1.60
  -3  -3  -1   45.20    1.70
   3  -3   1   48.30    1.60
  -3  -3  -1   47.50    2.00
  -3  -3  -1   46.00    1.70
   3  -3   1   47.70    3.00
   3  -3   1   45.30    2.50
  -3  -3  -1   45.70    2.30
  -3  -3  -1   42.80    1.70
  -3   3  -2  158.18    4.80
   3   3   2  157.88    4.80
  -3   3  -2  158.58    4.90
   3   3   2  153.78    7.10
   3   3   2  158.18    4.80
  -3   3  -2  155.08    6.00
   3   3   2  159.68    5.60
  -3   3  -2  156.38    7.00
  -3   3  -2  158.98    9.50
  -3  -3  -2  160.18    5.60
   3  -3   2  156.58    4.60
   3  -3   2  149.99    6.00
   3  -3   2  161.98    4.80
   3  -3   2  162.38    7.20
   3  -3   2  156.78    4.70
  -3  -3  -2  162.28    5.00
  -3  -3  -2  156.08    4.60
  -3  -3  -2  154.98    4.80
  -3  -3  -2  154.78    4.80
   3   3   3  111.69    5.50
  -3   3  -3  112.79    5.50
  -3   3  -3  112.79    3.80
  -3   3  -3  120.69    4.80
   3   3   3  115.99    3.60
  -3   3  -3  113.59    3.70
   3   3   3  115.89    3.70
   3   3   3  111.69    4.20
  -3   3  -3  112.29    7.40
   3  -3   3  112.69    3.60
   3  -3   3  109.09    5.60
  -3  -3  -3  116.59    3.60
  -3  -3  -3  114.99    3.50
  -3  -3  -3  115.39    3.60
  -3  -3  -3  117.69    3.90
   3  -3   3  108.89    4.80
   3  -3   3  115.89    3.80
   3  -3   3  108.69    3.70
  -3  -3  -3  114.89    4.20
   3   3   4   65.59    2.30
  -3   3  -4   66.09    2.50
  -3   3  -4   63.59    3.80
   3   3   4   61.29    3.70
  -3   3  -4   63.59    2.50
   3   3   4   63.29    2.70
  -3   3  -4   64.49    3.20
   3   3   4   64.79    2.30
  -3   3  -4   65.49    5.00
  -3  -3  -4   64.49    2.30
   3  -3   4   64.29    2.40
  -3  -3  -4   66.09    2.70
   3  -3   4   66.29    2.10
  -3  -3  -4   64.69    2.20
   3  -3   4   64.49    3.90
  -3  -3  -4   63.19    2.30
   3  -3   4   64.29    2.40
   3  -3   4   67.39    2.60
  -3  -3  -4   67.99    2.60
   3  -3   4   60.59    3.20
  -3   3  -5  489.45   14.60
  -3   3  -5  508.25   14.60
  -3   3  -5  500.75   26.30
  -3   3  -5  469.05   19.00
  -3   3  -5  518.25   16.50
   3   3   5  501.75   14.30
   3   3   5  499.95   14.30
   3   3   5  504.75   15.70
   3  -3   5  473.85   16.40
  -3  -3  -5  490.65   14.20
   3  -3   5  494.85   14.00
   3  -3   5  517.95   14.70
  -3  -3  -5  516.45   14.30
   3  -3   5  500.35   19.40
   3  -3   5  499.45   14.70
  -3  -3  -5  505.95   14.60
   3  -3   5  519.95   14.70
  -3  -3  -5  501.05   13.80
   3   3   6  148.69    4.80
  -3   3  -6  154.18    6.00
  -3   3  -6  149.09    5.10
  -3   3  -6  150.28    9.40
   3   3   6  151.68    4.80
   3   3   6  149.49    5.20
  -3   3  -6  156.58    5.10
   3   3   6  150.58    5.20
  -3   3  -6  141.79    6.90
  -3  -3  -6  149.49    4.60
   3  -3   6  157.48    5.20
   3  -3   6  145.39    4.90
  -3  -3  -6  154.08    4.80
   3  -3   6  153.78    7.20
   3  -3   6  142.19    6.00
  -3  -3  -6  155.88    5.10
[truncated: 1,785,520 more chars]
