# Supplementary material
Source: MDPI journal article supplement (https://www.mdpi.com/2304-6740/10/2/19)
Supplement: s1 [file s1 › 5gold_complex.cif]

data_shelxt_a
_audit_creation_date               2021-12-05
_audit_creation_method
;
Olex2 1.3
(compiled 2020.11.12 svn.r5f609507 for OlexSys, GUI svn.r6408)
;
_shelx_SHELXL_version_number       '2018/3'
_audit_contact_author_address      ?
_audit_contact_author_email        ?
_audit_contact_author_name         ''
_audit_contact_author_phone        ?
_publ_contact_author_id_orcid      ?
_publ_requested_journal            ?
_publ_section_references
;
Dolomanov, O.V., Bourhis, L.J., Gildea, R.J, Howard, J.A.K. & Puschmann, H.
 (2009), J. Appl. Cryst. 42, 339-341.

Sheldrick, G.M. (2015). Acta Cryst. A71, 3-8.

Sheldrick, G.M. (2015). Acta Cryst. C71, 3-8.
;
_chemical_name_common              ?
_chemical_name_systematic          ?
_chemical_formula_moiety           'C34 H38 Au2 O4 P2 S2'
_chemical_formula_sum              'C34 H38 Au2 O4 P2 S2'
_chemical_formula_weight           1030.63
_chemical_melting_point            ?
loop_
  _atom_type_symbol
  _atom_type_description
  _atom_type_scat_dispersion_real
  _atom_type_scat_dispersion_imag
  _atom_type_scat_source
 'C' 'C' 0.0033 0.0016 'International Tables Vol C Tables 4.2.6.8 and 6.1.1.4'
 'H' 'H' 0.0000 0.0000 'International Tables Vol C Tables 4.2.6.8 and 6.1.1.4'
 'Au' 'Au' -2.0133 8.8022
 'International Tables Vol C Tables 4.2.6.8 and 6.1.1.4'
 'O' 'O' 0.0106 0.0060 'International Tables Vol C Tables 4.2.6.8 and 6.1.1.4'
 'P' 'P' 0.1023 0.0942 'International Tables Vol C Tables 4.2.6.8 and 6.1.1.4'
 'S' 'S' 0.1246 0.1234 'International Tables Vol C Tables 4.2.6.8 and 6.1.1.4'

_shelx_space_group_comment
;
The symmetry employed for this shelxl refinement is uniquely defined
by the following loop, which should always be used as a source of
symmetry information in preference to the above space-group names.
They are only intended as comments.
;
_space_group_crystal_system        'monoclinic'
_space_group_IT_number             14
_space_group_name_H-M_alt          'P 1 21/n 1'
_space_group_name_Hall             '-P 2yn'
loop_
  _space_group_symop_operation_xyz
 'x, y, z'
 '-x+1/2, y+1/2, -z+1/2'
 '-x, -y, -z'
 'x-1/2, -y-1/2, z-1/2'

_cell_length_a                     11.7462(9)
_cell_length_b                     39.197(3)
_cell_length_c                     15.6529(15)
_cell_angle_alpha                  90
_cell_angle_beta                   107.882(4)
_cell_angle_gamma                  90
_cell_volume                       6858.7(10)
_cell_formula_units_Z              8
_cell_measurement_reflns_used      8813
_cell_measurement_temperature      150(2)
_cell_measurement_theta_max        28.33
_cell_measurement_theta_min        2.79
_shelx_estimated_absorpt_T_max     0.444
_shelx_estimated_absorpt_T_min     0.227
_exptl_absorpt_coefficient_mu      8.798
_exptl_absorpt_correction_T_max    0.7457
_exptl_absorpt_correction_T_min    0.3853
_exptl_absorpt_correction_type     multi-scan
_exptl_absorpt_process_details
;
SADABS-2008/1 (Bruker,2008) was used for absorption correction.
wR2(int) was 0.1349 before and 0.0561 after correction.
The Ratio of minimum to maximum transmission is 0.5167.
The \l/2 correction factor is 0.0015.
;
_exptl_absorpt_special_details     ?
_exptl_crystal_colour              violet
_exptl_crystal_colour_primary      violet
_exptl_crystal_density_diffrn      1.996
_exptl_crystal_density_meas        .
_exptl_crystal_density_method      ?
_exptl_crystal_description         block
_exptl_crystal_F_000               3952
_exptl_crystal_size_max            0.24
_exptl_crystal_size_mid            0.18
_exptl_crystal_size_min            0.11
_exptl_transmission_factor_max     ?
_exptl_transmission_factor_min     ?
_diffrn_reflns_av_R_equivalents    0.0374
_diffrn_reflns_av_unetI/netI       0.0434
_diffrn_reflns_Laue_measured_fraction_full  0.998
_diffrn_reflns_Laue_measured_fraction_max  0.997
_diffrn_reflns_limit_h_max         15
_diffrn_reflns_limit_h_min         -14
_diffrn_reflns_limit_k_max         50
_diffrn_reflns_limit_k_min         -48
_diffrn_reflns_limit_l_max         11
_diffrn_reflns_limit_l_min         -20
_diffrn_reflns_number              56967
_diffrn_reflns_point_group_measured_fraction_full  0.998
_diffrn_reflns_point_group_measured_fraction_max  0.997
_diffrn_reflns_theta_full          25.242
_diffrn_reflns_theta_max           27.103
_diffrn_reflns_theta_min           1.039
_diffrn_ambient_temperature        150.02
_diffrn_detector_area_resol_mean   ?
_diffrn_measured_fraction_theta_full  0.998
_diffrn_measured_fraction_theta_max  0.997
_diffrn_measurement_device_type    'Bruker APEX-II CCD'
_diffrn_measurement_method         '\f and \w scans'
_diffrn_radiation_type             MoK\a
_diffrn_radiation_wavelength       0.71073
_diffrn_source                     ?
_reflns_Friedel_coverage           0.000
_reflns_Friedel_fraction_full      .
_reflns_Friedel_fraction_max       .
_reflns_number_gt                  11580
_reflns_number_total               15085
_reflns_special_details
;
 Reflections were merged by SHELXL according to the crystal
 class for the calculation of statistics and refinement.
 
 _reflns_Friedel_fraction is defined as the number of unique
 Friedel pairs measured divided by the number that would be
 possible theoretically, ignoring centric projections and
 systematic absences. Completness statistics refer to single and
 composite reflections containing twin component 1 only.
;
_reflns_threshold_expression       'I > 2\s(I)'
_computing_cell_refinement         ?
_computing_data_collection         ?
_computing_data_reduction          ?
_computing_molecular_graphics      'Olex2 1.3 (Dolomanov et al., 2009)'
_computing_publication_material    'Olex2 1.3 (Dolomanov et al., 2009)'
_computing_structure_refinement    'SHELXL 2018/3 (Sheldrick, 2015)'
_computing_structure_solution      'SHELXT 2018/2 (Sheldrick, 2018)'
_refine_diff_density_max           5.653
_refine_diff_density_min           -5.541
_refine_diff_density_rms           0.329
_refine_ls_extinction_coef         .
_refine_ls_extinction_method       none
_refine_ls_goodness_of_fit_ref     1.158
_refine_ls_hydrogen_treatment      constr
_refine_ls_matrix_type             full
_refine_ls_number_parameters       724
_refine_ls_number_reflns           15085
_refine_ls_number_restraints       7
_refine_ls_R_factor_all            0.1174
_refine_ls_R_factor_gt             0.0952
_refine_ls_restrained_S_all        1.160
_refine_ls_shift/su_max            0.000
_refine_ls_shift/su_mean           0.000
_refine_ls_structure_factor_coef   Fsqd
_refine_ls_weighting_details      
 'w=1/[\s^2^(Fo^2^)+(0.0383P)^2^+443.7759P] where P=(Fo^2^+2Fc^2^)/3'
_refine_ls_weighting_scheme        calc
_refine_ls_wR_factor_gt            0.2167
_refine_ls_wR_factor_ref           0.2270
_refine_special_details
;
 Refined as a 2-component twin.
;
_olex2_refinement_description
;
1. Twinned data refinement
 Scales: 0.9985(4)
 0.0015(4)
2. Fixed Uiso
 At 1.2 times of:
  All C(H) groups, All C(H,H) groups
 At 1.5 times of:
  All C(H,H,H) groups
3. Restrained distances
 S2-C13
 1.81 with sigma of 0.02
 S4-C61
 1.81 with sigma of 0.02
 C57-O8
 1.2 with sigma of 0.02
 C57-S3
 1.78 with sigma of 0.02
 C65-O2
 1.2 with sigma of 0.02
 C65-S1
 1.78 with sigma of 0.02
 C65-O1
 1.4 with sigma of 0.02
4. Uiso/Uaniso restraints and constraints
Uanis(C13) = Uanis(O3) = Uanis(O4)
Uanis(S1) = Uanis(C65) = Uanis(O1) = Uanis(O2)
Uanis(C61) = Uanis(S4) = Uanis(O5) = Uanis(O6)
Uanis(O7) = Uanis(C57) = Uanis(O8) = Uanis(S3)
Uanis(C58) = Uanis(C60) = Uanis(C59)
5.a Ternary CH refined with riding coordinates:
 C14(H14), C58(H58), C62(H62), C66(H66)
5.b Secondary CH2 refined with riding coordinates:
 C17(H17A,H17B), C18(H18A,H18B), C43(H43A,H43B), C44(H44A,H44B)
5.c Aromatic/amide H refined with riding coordinates:
 C2(H2), C3(H3), C4(H4), C5(H5), C6(H6), C8(H8), C9(H9), C10(H10), C11(H11),
 C12(H12), C20(H20), C21(H21), C22(H22), C23(H23), C24(H24), C26(H26), C27(H27),
  C28(H28), C29(H29), C30(H30), C32(H32), C33(H33), C34(H34), C35(H35),
 C36(H36), C38(H38), C39(H39), C40(H40), C41(H41), C42(H42), C46(H46), C47(H47),
  C48(H48), C49(H49), C50(H50), C52(H52), C53(H53), C54(H54), C55(H55), C56(H56)
5.d Idealised Me refined as rotating group:
 C15(H15A,H15B,H15C), C16(H16A,H16B,H16C), C59(H59A,H59B,H59C), C60(H60A,H60B,
 H60C), C63(H63A,H63B,H63C), C64(H64A,H64B,H64C), C67(H67A,H67B,H67C), C68(H68A,
 H68B,H68C)
;
_atom_sites_solution_hydrogens     geom
_atom_sites_solution_primary       dual
_atom_sites_solution_secondary     ?
loop_
  _atom_site_label
  _atom_site_type_symbol
  _atom_site_fract_x
  _atom_site_fract_y
  _atom_site_fract_z
  _atom_site_U_iso_or_equiv
  _atom_site_adp_type
  _atom_site_occupancy
  _atom_site_site_symmetry_order
  _atom_site_calc_flag
  _atom_site_refinement_flags_posn
  _atom_site_refinement_flags_adp
  _atom_site_refinement_flags_occupancy
  _atom_site_disorder_assembly
  _atom_site_disorder_group
 Au1 Au 0.21169(6) 0.18749(2) -0.14466(5) 0.03312(18) Uani 1 1 d . . . . .
 Au2 Au 0.26673(6) 0.06066(2) 0.16270(5) 0.03435(19) Uani 1 1 d . . . . .
 Au3 Au 0.23227(6) 0.05871(2) 0.36814(5) 0.03430(19) Uani 1 1 d . . . . .
 Au4 Au 0.24455(6) 0.19313(2) 0.64974(5) 0.03497(19) Uani 1 1 d . . . . .
 C1 C 0.4001(14) 0.1206(4) -0.1504(11) 0.025(3) Uani 1 1 d . . . . .
 C2 C 0.3962(18) 0.0851(5) -0.1517(13) 0.040(4) Uani 1 1 d . . . . .
 H2 H 0.357489 0.073100 -0.115822 0.048 Uiso 1 1 calc R U . . .
 C3 C 0.449(2) 0.0678(6) -0.2054(16) 0.050(6) Uani 1 1 d . . . . .
 H3 H 0.444808 0.043636 -0.207322 0.060 Uiso 1 1 calc R U . . .
 C4 C 0.5072(18) 0.0844(6) -0.2563(13) 0.041(5) Uani 1 1 d . . . . .
 H4 H 0.544335 0.071878 -0.292483 0.050 Uiso 1 1 calc R U . . .
 C5 C 0.5113(17) 0.1198(6) -0.2542(13) 0.039(4) Uani 1 1 d . . . . .
 H5 H 0.552129 0.131679 -0.289048 0.047 Uiso 1 1 calc R U . . .
 C6 C 0.4579(16) 0.1376(5) -0.2032(12) 0.034(4) Uani 1 1 d . . . . .
 H6 H 0.459750 0.161827 -0.203496 0.041 Uiso 1 1 calc R U . . .
 C7 C 0.4716(15) 0.1616(5) 0.0051(11) 0.030(4) Uani 1 1 d . . . . .
 C8 C 0.4775(18) 0.1952(5) 0.0324(13) 0.039(4) Uani 1 1 d . . . . .
 H8 H 0.411373 0.209978 0.008021 0.047 Uiso 1 1 calc R U . . .
 C9 C 0.5811(18) 0.2074(6) 0.0962(14) 0.044(5) Uani 1 1 d . . . . .
 H9 H 0.584808 0.230508 0.115441 0.052 Uiso 1 1 calc R U . . .
 C10 C 0.678(2) 0.1861(5) 0.1315(15) 0.046(5) Uani 1 1 d . . . . .
 H10 H 0.748732 0.194643 0.173986 0.055 Uiso 1 1 calc R U . . .
 C11 C 0.6725(19) 0.1522(5) 0.1046(15) 0.047(5) Uani 1 1 d . . . . .
 H11 H 0.738132 0.137297 0.128907 0.057 Uiso 1 1 calc R U . . .
 C12 C 0.5684(17) 0.1406(5) 0.0413(13) 0.036(4) Uani 1 1 d . . . . .
 H12 H 0.564153 0.117488 0.022514 0.043 Uiso 1 1 calc R U . . .
 C13 C 0.502(3) 0.0334(10) 0.139(3) 0.115(6) Uani 1 1 d D . . . .
 C14 C 0.679(2) 0.0261(7) 0.087(2) 0.076(9) Uani 1 1 d . . . . .
 H14 H 0.634206 0.031876 0.023436 0.091 Uiso 1 1 calc R U . . .
 C15 C 0.7694(17) 0.0576(6) 0.1252(17) 0.057(7) Uani 1 1 d . . . . .
 H15A H 0.782347 0.060136 0.189764 0.085 Uiso 1 1 calc R U . . .
 H15B H 0.734910 0.078615 0.094195 0.085 Uiso 1 1 calc R U . . .
 H15C H 0.846031 0.052956 0.114655 0.085 Uiso 1 1 calc R U . . .
 C16 C 0.752(2) -0.0081(4) 0.0842(19) 0.055(7) Uani 1 1 d . . . . .
 H16A H 0.727948 -0.016965 0.022717 0.083 Uiso 1 1 calc R U . . .
 H16B H 0.734397 -0.025112 0.124280 0.083 Uiso 1 1 calc R U . . .
 H16C H 0.837652 -0.003070 0.103708 0.083 Uiso 1 1 calc R U . . .
 C17 C 0.2692(17) 0.1152(5) -0.0211(13) 0.034(4) Uani 1 1 d . . . . .
 H17A H 0.209061 0.101633 -0.066714 0.041 Uiso 1 1 calc R U . . .
 H17B H 0.330700 0.099239 0.014927 0.041 Uiso 1 1 calc R U . . .
 C18 C 0.2085(15) 0.1327(5) 0.0401(12) 0.030(4) Uani 1 1 d . . . . .
 H18A H 0.146494 0.148527 0.003911 0.036 Uiso 1 1 calc R U . . .
 H18B H 0.268459 0.146448 0.085300 0.036 Uiso 1 1 calc R U . . .
 C19 C 0.0057(15) 0.0858(5) 0.0106(12) 0.030(4) Uani 1 1 d . . . . .
 C20 C -0.0934(15) 0.1067(5) -0.0230(13) 0.032(4) Uani 1 1 d . . . . .
 H20 H -0.091696 0.129836 -0.004418 0.039 Uiso 1 1 calc R U . . .
 C21 C -0.1975(18) 0.0929(6) -0.0857(14) 0.045(5) Uani 1 1 d . . . . .
 H21 H -0.266478 0.106690 -0.109493 0.054 Uiso 1 1 calc R U . . .
 C22 C -0.1981(18) 0.0597(5) -0.1117(13) 0.039(4) Uani 1 1 d . . . . .
 H22 H -0.268045 0.050418 -0.153385 0.047 Uiso 1 1 calc R U . . .
 C23 C -0.0993(19) 0.0395(5) -0.0786(14) 0.041(5) Uani 1 1 d . . . . .
 H23 H -0.100344 0.016674 -0.098920 0.050 Uiso 1 1 calc R U . . .
 C24 C 0.0008(16) 0.0519(4) -0.0166(13) 0.033(4) Uani 1 1 d . . . . .
 H24 H 0.067449 0.037384 0.008073 0.039 Uiso 1 1 calc R U . . .
 C25 C 0.0798(15) 0.1283(5) 0.1700(12) 0.031(4) Uani 1 1 d . . . . .
 C26 C 0.0177(17) 0.1108(5) 0.2187(13) 0.036(4) Uani 1 1 d . . . . .
 H26 H 0.012208 0.086652 0.216447 0.043 Uiso 1 1 calc R U . . .
 C27 C -0.0369(19) 0.1299(7) 0.2717(13) 0.049(6) Uani 1 1 d . . . . .
 H27 H -0.080931 0.118544 0.304926 0.059 Uiso 1 1 calc R U . . .
 C28 C -0.0269(19) 0.1654(6) 0.2759(13) 0.044(5) Uani 1 1 d . . . . .
 H28 H -0.065554 0.178227 0.310497 0.053 Uiso 1 1 calc R U . . .
 C29 C 0.039(2) 0.1816(6) 0.2295(15) 0.049(5) Uani 1 1 d . . . . .
 H29 H 0.049750 0.205600 0.234280 0.059 Uiso 1 1 calc R U . . .
 C30 C 0.090(2) 0.1632(5) 0.1766(15) 0.045(5) Uani 1 1 d . . . . .
 H30 H 0.132755 0.174933 0.143337 0.054 Uiso 1 1 calc R U . . .
 C31 C 0.3933(15) 0.1310(5) 0.3747(12) 0.032(4) Uani 1 1 d . . . . .
 C32 C 0.4380(17) 0.1196(7) 0.3069(12) 0.047(5) Uani 1 1 d . . . . .
 H32 H 0.449819 0.095962 0.298939 0.056 Uiso 1 1 calc R U . . .
 C33 C 0.4650(18) 0.1441(7) 0.2506(13) 0.048(5) Uani 1 1 d . . . . .
 H33 H 0.496807 0.136814 0.204708 0.057 Uiso 1 1 calc R U . . .
 C34 C 0.447(2) 0.1787(7) 0.2600(15) 0.052(6) Uani 1 1 d . . . . .
 H34 H 0.464587 0.194750 0.220552 0.062 Uiso 1 1 calc R U . . .
 C35 C 0.403(2) 0.1892(6) 0.3263(19) 0.058(7) Uani 1 1 d . . . . .
 H35 H 0.389372 0.212814 0.333230 0.070 Uiso 1 1 calc R U . . .
 C36 C 0.3763(19) 0.1654(5) 0.3848(17) 0.048(5) Uani 1 1 d . . . . .
 H36 H 0.346714 0.173098 0.431564 0.057 Uiso 1 1 calc R U . . .
 C37 C 0.5056(14) 0.0836(4) 0.5110(11) 0.024(3) Uani 1 1 d . . . . .
 C38 C 0.5211(14) 0.0484(4) 0.5312(11) 0.025(3) Uani 1 1 d . . . . .
 H38 H 0.456608 0.032966 0.508465 0.030 Uiso 1 1 calc R U . . .
 C39 C 0.6311(16) 0.0368(4) 0.5843(13) 0.032(4) Uani 1 1 d . . . . .
 H39 H 0.643202 0.013119 0.597135 0.039 Uiso 1 1 calc R U . . .
 C40 C 0.7233(17) 0.0595(5) 0.6187(13) 0.038(4) Uani 1 1 d . . . . .
 H40 H 0.798048 0.051622 0.656869 0.046 Uiso 1 1 calc R U . . .
 C41 C 0.7080(16) 0.0927(5) 0.5987(13) 0.037(4) Uani 1 1 d . . . . .
 H41 H 0.773044 0.107864 0.622532 0.045 Uiso 1 1 calc R U . . .
 C42 C 0.5996(15) 0.1058(5) 0.5440(13) 0.033(4) Uani 1 1 d . . . . .
 H42 H 0.591071 0.129372 0.529838 0.040 Uiso 1 1 calc R U . . .
 C43 C 0.3050(15) 0.1200(4) 0.5287(11) 0.028(4) Uani 1 1 d . . . . .
 H43A H 0.313240 0.104300 0.579680 0.033 Uiso 1 1 calc R U . . .
 H43B H 0.355406 0.140294 0.551856 0.033 Uiso 1 1 calc R U . . .
 C44 C 0.1738(14) 0.1314(4) 0.4914(12) 0.029(4) Uani 1 1 d . . . . .
 H44A H 0.123485 0.111048 0.468999 0.035 Uiso 1 1 calc R U . . .
 H44B H 0.165527 0.146786 0.439748 0.035 Uiso 1 1 calc R U . . .
 C45 C 0.0855(13) 0.1206(4) 0.6454(10) 0.022(3) Uani 1 1 d . . . . .
 C46 C 0.0357(15) 0.1310(5) 0.7099(11) 0.031(4) Uani 1 1 d . . . . .
 H46 H 0.019689 0.154506 0.715526 0.037 Uiso 1 1 calc R U . . .
 C47 C 0.0088(18) 0.1076(7) 0.7665(13) 0.052(6) Uani 1 1 d . . . . .
 H47 H -0.025482 0.114872 0.811092 0.063 Uiso 1 1 calc R U . . .
 C48 C 0.0321(19) 0.0734(6) 0.7578(16) 0.055(6) Uani 1 1 d . . . . .
 H48 H 0.015687 0.057128 0.797386 0.066 Uiso 1 1 calc R U . . .
 C49 C 0.0787(19) 0.0632(6) 0.6923(14) 0.043(5) Uani 1 1 d . . . . .
 H49 H 0.092557 0.039625 0.685293 0.052 Uiso 1 1 calc R U . . .
 C50 C 0.1056(16) 0.0866(5) 0.6366(13) 0.033(4) Uani 1 1 d . . . . .
 H50 H 0.138443 0.079138 0.591400 0.039 Uiso 1 1 calc R U . . .
 C51 C -0.0282(15) 0.1693(4) 0.5064(12) 0.029(4) Uani 1 1 d . . . . .
 C52 C -0.1240(16) 0.1473(5) 0.4740(13) 0.039(4) Uani 1 1 d . . . . .
 H52 H -0.115043 0.123752 0.488928 0.047 Uiso 1 1 calc R U . . .
 C53 C -0.2347(17) 0.1597(6) 0.4190(15) 0.049(6) Uani 1 1 d . . . . .
 H53 H -0.300045 0.144498 0.396377 0.059 Uiso 1 1 calc R U . . .
 C54 C -0.2486(16) 0.1942(5) 0.3978(13) 0.040(5) Uani 1 1 d . . . . .
 H54 H -0.323683 0.202852 0.362266 0.048 Uiso 1 1 calc R U . . .
 C55 C -0.1514(19) 0.2156(5) 0.4292(14) 0.043(5) Uani 1 1 d . . . . .
 H55 H -0.159034 0.239090 0.413381 0.051 Uiso 1 1 calc R U . . .
 C56 C -0.0423(17) 0.2032(5) 0.4839(14) 0.040(4) Uani 1 1 d . . . . .
 H56 H 0.023127 0.218386 0.505994 0.048 Uiso 1 1 calc R U . . .
 C57 C -0.015(2) 0.0338(6) 0.3761(17) 0.084(2) Uani 1 1 d D . . . .
 C58 C -0.2015(15) 0.0283(4) 0.4105(14) 0.033(2) Uani 1 1 d . . . . .
 H58 H -0.153525 0.031478 0.474928 0.040 Uiso 1 1 calc R U . . .
 C59 C -0.2715(15) -0.0053(4) 0.4014(14) 0.033(2) Uani 1 1 d . . . . .
 H59A H -0.339702 -0.002191 0.424278 0.049 Uiso 1 1 calc R U . . .
 H59B H -0.218958 -0.023180 0.436145 0.049 Uiso 1 1 calc R U . . .
 H59C H -0.300492 -0.012014 0.338109 0.049 Uiso 1 1 calc R U . . .
 C60 C -0.2791(15) 0.0641(4) 0.3739(14) 0.033(2) Uani 1 1 d . . . . .
 H60A H -0.291536 0.066669 0.309396 0.049 Uiso 1 1 calc R U . . .
 H60B H -0.234488 0.083728 0.406016 0.049 Uiso 1 1 calc R U . . .
 H60C H -0.356818 0.062704 0.384800 0.049 Uiso 1 1 calc R U . . .
 C61 C 0.495(2) 0.2158(7) 0.6475(19) 0.085(2) Uani 1 1 d D . . . .
 C62 C 0.672(2) 0.2252(7) 0.603(2) 0.076(9) Uani 1 1 d . . . . .
 H62 H 0.625724 0.221328 0.539057 0.091 Uiso 1 1 calc R U . . .
 C63 C 0.7447(15) 0.2575(4) 0.6100(15) 0.033(4) Uani 1 1 d . . . . .
 H63A H 0.767921 0.266113 0.671773 0.050 Uiso 1 1 calc R U . . .
 H63B H 0.696505 0.274798 0.569420 0.050 Uiso 1 1 calc R U . . .
 H63C H 0.816721 0.252691 0.592970 0.050 Uiso 1 1 calc R U . . .
 C64 C 0.7536(16) 0.1894(5) 0.6431(17) 0.047(5) Uani 1 1 d . . . . .
 H64A H 0.796511 0.182439 0.601316 0.070 Uiso 1 1 calc R U . . .
 H64B H 0.699854 0.171045 0.648855 0.070 Uiso 1 1 calc R U . . .
 H64C H 0.811216 0.194230 0.702022 0.070 Uiso 1 1 calc R U . . .
 C65 C -0.024(2) 0.2111(6) -0.1247(18) 0.095(3) Uani 1 1 d D . . . .
 C66 C -0.203(3) 0.2202(7) -0.061(3) 0.081(9) Uani 1 1 d . . . . .
 H66 H -0.152308 0.217335 0.003159 0.097 Uiso 1 1 calc R U . . .
 C67 C -0.2788(16) 0.2550(4) -0.0726(14) 0.034(4) Uani 1 1 d . . . . .
 H67A H -0.320227 0.258924 -0.136458 0.051 Uiso 1 1 calc R U . . .
 H67B H -0.224872 0.274162 -0.048461 0.051 Uiso 1 1 calc R U . . .
 H67C H -0.337770 0.253152 -0.040066 0.051 Uiso 1 1 calc R U . . .
 C68 C -0.2883(15) 0.1859(4) -0.0951(15) 0.038(5) Uani 1 1 d . . . . .
 H68A H -0.337352 0.182113 -0.055390 0.057 Uiso 1 1 calc R U . . .
 H68B H -0.237604 0.165944 -0.093551 0.057 Uiso 1 1 calc R U . . .
 H68C H -0.340528 0.189575 -0.156613 0.057 Uiso 1 1 calc R U . . .
 O1 O -0.1203(16) 0.2314(5) -0.1218(17) 0.095(3) Uani 1 1 d D . . . .
 O2 O -0.0038(17) 0.1867(4) -0.0723(16) 0.095(3) Uani 1 1 d D . . . .
 O3 O 0.488(2) 0.0609(6) 0.090(2) 0.115(6) Uani 1 1 d . . . . .
 O4 O 0.589(2) 0.0192(6) 0.131(2) 0.115(6) Uani 1 1 d . . . . .
 O5 O 0.4772(18) 0.1902(5) 0.5957(15) 0.085(2) Uani 1 1 d . . . . .
 O6 O 0.5861(18) 0.2343(5) 0.6535(15) 0.085(2) Uani 1 1 d . . . . .
 O7 O -0.1168(16) 0.0197(4) 0.3572(15) 0.084(2) Uani 1 1 d . . . . .
 O8 O 0.0004(16) 0.0584(4) 0.4255(14) 0.084(2) Uani 1 1 d D . . . .
 P2 P 0.1394(4) 0.10253(11) 0.0974(3) 0.0268(9) Uani 1 1 d . . . . .
 P3 P 0.3601(4) 0.09871(11) 0.4447(3) 0.0262(9) Uani 1 1 d . . . . .
 P4 P 0.1177(4) 0.15319(11) 0.5732(3) 0.0252(9) Uani 1 1 d . . . . .
 P5 P 0.3402(4) 0.14597(11) -0.0784(3) 0.0247(9) Uani 1 1 d . . . . .
 S1 S 0.0637(7) 0.22761(19) -0.1957(7) 0.095(3) Uani 1 1 d D . . . .
 S2 S 0.4119(6) 0.01961(16) 0.2107(6) 0.085(3) Uani 1 1 d D . . . .
 S3 S 0.0825(6) 0.02021(17) 0.3066(6) 0.084(2) Uani 1 1 d D . . . .
 S4 S 0.3944(7) 0.23211(19) 0.7121(6) 0.085(2) Uani 1 1 d D . . . .

loop_
  _atom_site_aniso_label
  _atom_site_aniso_U_11
  _atom_site_aniso_U_22
  _atom_site_aniso_U_33
  _atom_site_aniso_U_23
  _atom_site_aniso_U_13
  _atom_site_aniso_U_12
 Au1 0.0296(3) 0.0265(3) 0.0396(4) -0.0009(3) 0.0052(3) 0.0022(3)
 Au2 0.0226(3) 0.0249(3) 0.0526(4) 0.0053(3) 0.0073(3) 0.0021(2)
 Au3 0.0187(3) 0.0256(3) 0.0534(5) -0.0048(3) 0.0036(3) -0.0001(2)
 Au4 0.0314(3) 0.0281(4) 0.0410(4) -0.0014(3) 0.0045(3) -0.0065(3)
 C1 0.023(8) 0.030(9) 0.019(8) 0.000(6) 0.005(6) -0.001(6)
 C2 0.044(11) 0.046(12) 0.034(10) 0.002(9) 0.019(9) 0.002(9)
 C3 0.051(12) 0.032(11) 0.055(13) -0.008(10) 0.000(11) 0.012(9)
 C4 0.045(11) 0.056(13) 0.025(9) -0.009(9) 0.013(9) 0.012(10)
 C5 0.036(10) 0.057(13) 0.029(10) 0.001(9) 0.016(8) 0.008(9)
 C6 0.035(9) 0.045(11) 0.025(9) -0.001(8) 0.012(8) -0.005(8)
 C7 0.029(8) 0.038(10) 0.020(8) -0.004(7) 0.004(7) -0.008(7)
 C8 0.042(10) 0.035(11) 0.039(11) -0.003(8) 0.011(9) 0.001(8)
 C9 0.042(11) 0.042(12) 0.042(11) -0.010(9) 0.005(9) -0.013(9)
 C10 0.050(12) 0.032(11) 0.044(12) 0.004(9) -0.002(10) -0.005(9)
 C11 0.042(11) 0.034(11) 0.051(13) 0.003(9) -0.008(10) 0.003(9)
 C12 0.040(10) 0.030(10) 0.035(10) -0.003(8) 0.008(8) -0.002(8)
 C13 0.089(10) 0.098(12) 0.198(19) -0.003(12) 0.104(12) -0.010(9)
 C14 0.054(15) 0.058(17) 0.10(2) 0.012(15) -0.007(15) -0.009(13)
 C15 0.027(10) 0.065(15) 0.067(15) -0.042(13) -0.002(10) -0.015(10)
 C16 0.066(14) 0.012(8) 0.12(2) 0.000(10) 0.069(15) -0.005(8)
 C17 0.037(10) 0.034(10) 0.038(10) 0.009(8) 0.018(8) 0.004(8)
 C18 0.023(8) 0.033(9) 0.032(9) -0.005(7) 0.007(7) -0.011(7)
 C19 0.030(9) 0.030(9) 0.037(10) -0.005(7) 0.018(8) -0.008(7)
 C20 0.028(8) 0.025(9) 0.040(10) -0.003(7) 0.006(8) -0.003(7)
 C21 0.033(10) 0.060(14) 0.041(11) 0.004(10) 0.011(9) 0.007(9)
 C22 0.039(10) 0.042(11) 0.031(9) 0.001(8) 0.004(8) -0.016(9)
 C23 0.058(13) 0.029(10) 0.041(11) 0.005(8) 0.019(10) 0.001(9)
 C24 0.036(9) 0.017(8) 0.044(11) 0.002(7) 0.011(8) 0.001(7)
 C25 0.021(8) 0.034(10) 0.033(9) 0.000(7) 0.002(7) 0.004(7)
 C26 0.040(10) 0.026(9) 0.035(10) 0.004(7) 0.002(8) 0.003(8)
 C27 0.040(11) 0.082(17) 0.028(10) 0.002(10) 0.015(9) 0.011(11)
 C28 0.046(11) 0.048(13) 0.034(10) -0.006(9) 0.006(9) 0.019(10)
 C29 0.069(15) 0.038(12) 0.052(13) -0.005(10) 0.033(12) 0.005(10)
 C30 0.053(12) 0.035(11) 0.054(13) -0.007(9) 0.027(11) -0.004(9)
 C31 0.022(8) 0.035(10) 0.033(10) 0.001(8) -0.001(7) 0.000(7)
 C32 0.035(10) 0.081(17) 0.022(9) -0.008(10) 0.005(8) -0.016(10)
 C33 0.040(11) 0.076(17) 0.024(10) -0.011(10) 0.007(8) -0.008(11)
 C34 0.044(12) 0.075(17) 0.035(11) 0.013(11) 0.011(10) -0.006(11)
 C35 0.054(13) 0.041(13) 0.088(19) 0.027(12) 0.033(14) 0.007(10)
 C36 0.044(11) 0.040(12) 0.067(15) 0.016(10) 0.030(11) 0.007(9)
 C37 0.019(7) 0.028(9) 0.025(8) -0.002(6) 0.010(6) 0.007(6)
 C38 0.029(8) 0.010(7) 0.036(9) -0.007(6) 0.011(7) 0.000(6)
 C39 0.039(10) 0.015(8) 0.041(10) 0.000(7) 0.009(8) 0.011(7)
 C40 0.038(10) 0.038(10) 0.032(9) -0.006(8) 0.000(8) 0.015(8)
 C41 0.025(9) 0.045(11) 0.042(11) -0.005(9) 0.011(8) -0.007(8)
 C42 0.026(8) 0.026(9) 0.046(11) 0.000(8) 0.008(8) -0.001(7)
 C43 0.028(8) 0.030(9) 0.025(8) 0.009(7) 0.008(7) 0.009(7)
 C44 0.025(8) 0.029(9) 0.028(9) -0.007(7) 0.002(7) -0.005(7)
 C45 0.018(7) 0.031(9) 0.016(7) -0.001(6) 0.004(6) 0.001(6)
 C46 0.026(8) 0.048(11) 0.018(8) -0.003(7) 0.004(7) 0.007(8)
 C47 0.034(10) 0.10(2) 0.024(10) 0.001(11) 0.010(8) -0.006(11)
 C48 0.043(12) 0.056(15) 0.060(15) 0.035(12) 0.006(11) -0.012(10)
 C49 0.045(11) 0.046(12) 0.039(11) 0.006(9) 0.013(9) -0.004(9)
 C50 0.035(9) 0.027(9) 0.039(10) 0.001(8) 0.017(8) -0.005(7)
 C51 0.024(8) 0.029(9) 0.035(9) -0.004(7) 0.009(7) 0.004(7)
 C52 0.031(9) 0.039(11) 0.042(11) 0.007(9) 0.004(8) -0.004(8)
 C53 0.026(9) 0.064(15) 0.046(12) 0.020(11) -0.005(9) -0.012(9)
 C54 0.028(9) 0.050(12) 0.033(10) 0.006(9) -0.005(8) 0.016(8)
 C55 0.053(12) 0.027(10) 0.048(12) -0.001(9) 0.013(10) 0.012(9)
 C56 0.032(9) 0.036(11) 0.048(12) 0.001(9) 0.007(9) 0.007(8)
 C57 0.060(3) 0.040(3) 0.117(6) 0.004(3) -0.026(4) -0.016(3)
 C58 0.024(5) 0.019(5) 0.060(7) 0.002(5) 0.019(5) 0.001(4)
 C59 0.024(5) 0.019(5) 0.060(7) 0.002(5) 0.019(5) 0.001(4)
 C60 0.024(5) 0.019(5) 0.060(7) 0.002(5) 0.019(5) 0.001(4)
 C61 0.077(4) 0.047(3) 0.103(5) 0.001(3) -0.014(4) -0.024(3)
 C62 0.056(16) 0.065(18) 0.11(3) -0.009(17) 0.033(17) -0.013(13)
 C63 0.029(8) 0.009(7) 0.070(13) -0.013(8) 0.028(9) -0.006(6)
 C64 0.020(8) 0.033(10) 0.080(16) 0.006(10) 0.003(9) 0.010(7)
 C65 0.064(4) 0.044(3) 0.139(7) -0.010(4) -0.025(4) 0.014(3)
 C66 0.068(18) 0.044(15) 0.13(3) 0.016(17) 0.030(19) 0.006(13)
 C67 0.040(10) 0.017(8) 0.064(13) -0.008(8) 0.041(10) -0.003(7)
 C68 0.023(8) 0.018(8) 0.064(13) -0.016(8) 0.000(8) 0.002(6)
 O1 0.064(4) 0.044(3) 0.139(7) -0.010(4) -0.025(4) 0.014(3)
 O2 0.064(4) 0.044(3) 0.139(7) -0.010(4) -0.025(4) 0.014(3)
 O3 0.089(10) 0.098(12) 0.198(19) -0.003(12) 0.104(12) -0.010(9)
 O4 0.089(10) 0.098(12) 0.198(19) -0.003(12) 0.104(12) -0.010(9)
 O5 0.077(4) 0.047(3) 0.103(5) 0.001(3) -0.014(4) -0.024(3)
 O6 0.077(4) 0.047(3) 0.103(5) 0.001(3) -0.014(4) -0.024(3)
 O7 0.060(3) 0.040(3) 0.117(6) 0.004(3) -0.026(4) -0.016(3)
 O8 0.060(3) 0.040(3) 0.117(6) 0.004(3) -0.026(4) -0.016(3)
 P2 0.0198(19) 0.023(2) 0.036(2) 0.0015(18) 0.0062(18) -0.0026(16)
 P3 0.0173(18) 0.024(2) 0.035(2) -0.0027(18) 0.0041(17) 0.0039(15)
 P4 0.026(2) 0.024(2) 0.026(2) -0.0017(17) 0.0093(17) -0.0004(16)
 P5 0.028(2) 0.022(2) 0.024(2) -0.0004(16) 0.0085(17) 0.0021(16)
 S1 0.064(4) 0.044(3) 0.139(7) -0.010(4) -0.025(4) 0.014(3)
 S2 0.050(4) 0.034(3) 0.134(7) -0.005(4) -0.025(4) 0.017(3)
 S3 0.060(3) 0.040(3) 0.117(6) 0.004(3) -0.026(4) -0.016(3)
 S4 0.077(4) 0.047(3) 0.103(5) 0.001(3) -0.014(4) -0.024(3)

_geom_special_details
;
 All esds (except the esd in the dihedral angle between two l.s. planes)
 are estimated using the full covariance matrix.  The cell esds are taken
 into account individually in the estimation of esds in distances, angles
 and torsion angles; correlations between esds in cell parameters are only
 used when they are defined by crystal symmetry.  An approximate (isotropic)
 treatment of cell esds is used for estimating esds involving l.s. planes.
;
loop_
  _geom_bond_atom_site_label_1
  _geom_bond_atom_site_label_2
  _geom_bond_distance
  _geom_bond_site_symmetry_2
  _geom_bond_publ_flag
 Au1 Au4 3.3641(12) 1_554 ?
 Au1 P5 2.246(4) . ?
 Au1 S1 2.298(7) . ?
 Au2 Au3 3.3631(12) . ?
 Au2 P2 2.244(4) . ?
 Au2 S2 2.296(6) . ?
 Au3 P3 2.246(4) . ?
 Au3 S3 2.294(6) . ?
 Au4 P4 2.238(4) . ?
 Au4 S4 2.308(7) . ?
 C1 C2 1.39(3) . ?
 C1 C6 1.39(2) . ?
 C1 P5 1.799(17) . ?
 C2 H2 0.9500 . ?
 C2 C3 1.37(3) . ?
 C3 H3 0.9500 . ?
 C3 C4 1.36(3) . ?
 C4 H4 0.9500 . ?
 C4 C5 1.39(3) . ?
 C5 H5 0.9500 . ?
 C5 C6 1.35(3) . ?
 C6 H6 0.9500 . ?
 C7 C8 1.38(3) . ?
 C7 C12 1.38(3) . ?
 C7 P5 1.796(17) . ?
 C8 H8 0.9500 . ?
 C8 C9 1.40(3) . ?
 C9 H9 0.9500 . ?
 C9 C10 1.38(3) . ?
 C10 H10 0.9500 . ?
 C10 C11 1.39(3) . ?
 C11 H11 0.9500 . ?
 C11 C12 1.39(3) . ?
 C12 H12 0.9500 . ?
 C13 O3 1.30(4) . ?
 C13 O4 1.21(4) . ?
 C13 S2 1.838(18) . ?
 C14 H14 1.0000 . ?
 C14 C15 1.62(3) . ?
 C14 C16 1.60(3) . ?
 C14 O4 1.44(4) . ?
 C15 H15A 0.9800 . ?
 C15 H15B 0.9800 . ?
 C15 H15C 0.9800 . ?
 C16 H16A 0.9800 . ?
 C16 H16B 0.9800 . ?
 C16 H16C 0.9800 . ?
 C17 H17A 0.9900 . ?
 C17 H17B 0.9900 . ?
 C17 C18 1.52(2) . ?
 C17 P5 1.849(18) . ?
 C18 H18A 0.9900 . ?
 C18 H18B 0.9900 . ?
 C18 P2 1.820(17) . ?
 C19 C20 1.39(3) . ?
 C19 C24 1.39(2) . ?
 C19 P2 1.852(18) . ?
 C20 H20 0.9500 . ?
 C20 C21 1.42(3) . ?
 C21 H21 0.9500 . ?
 C21 C22 1.36(3) . ?
 C22 H22 0.9500 . ?
 C22 C23 1.37(3) . ?
 C23 H23 0.9500 . ?
 C23 C24 1.36(3) . ?
 C24 H24 0.9500 . ?
 C25 C26 1.39(3) . ?
 C25 C30 1.37(3) . ?
 C25 P2 1.815(19) . ?
 C26 H26 0.9500 . ?
 C26 C27 1.41(3) . ?
 C27 H27 0.9500 . ?
 C27 C28 1.40(3) . ?
 C28 H28 0.9500 . ?
 C28 C29 1.37(3) . ?
 C29 H29 0.9500 . ?
 C29 C30 1.36(3) . ?
 C30 H30 0.9500 . ?
 C31 C32 1.40(3) . ?
 C31 C36 1.38(3) . ?
 C31 P3 1.792(19) . ?
 C32 H32 0.9500 . ?
 C32 C33 1.40(3) . ?
 C33 H33 0.9500 . ?
 C33 C34 1.39(3) . ?
 C34 H34 0.9500 . ?
 C34 C35 1.36(3) . ?
 C35 H35 0.9500 . ?
 C35 C36 1.41(3) . ?
 C36 H36 0.9500 . ?
 C37 C38 1.42(2) . ?
 C37 C42 1.37(2) . ?
 C37 P3 1.805(16) . ?
 C38 H38 0.9500 . ?
 C38 C39 1.38(2) . ?
 C39 H39 0.9500 . ?
 C39 C40 1.38(3) . ?
 C40 H40 0.9500 . ?
 C40 C41 1.34(3) . ?
 C41 H41 0.9500 . ?
 C41 C42 1.40(3) . ?
 C42 H42 0.9500 . ?
 C43 H43A 0.9900 . ?
 C43 H43B 0.9900 . ?
 C43 C44 1.54(2) . ?
 C43 P3 1.836(17) . ?
 C44 H44A 0.9900 . ?
 C44 H44B 0.9900 . ?
 C44 P4 1.822(17) . ?
 C45 C46 1.37(2) . ?
 C45 C50 1.37(2) . ?
 C45 P4 1.821(16) . ?
 C46 H46 0.9500 . ?
 C46 C47 1.38(3) . ?
 C47 H47 0.9500 . ?
 C47 C48 1.38(4) . ?
 C48 H48 0.9500 . ?
 C48 C49 1.36(3) . ?
 C49 H49 0.9500 . ?
 C49 C50 1.37(3) . ?
 C50 H50 0.9500 . ?
 C51 C52 1.38(3) . ?
 C51 C56 1.37(3) . ?
 C51 P4 1.824(17) . ?
 C52 H52 0.9500 . ?
 C52 C53 1.41(3) . ?
 C53 H53 0.9500 . ?
 C53 C54 1.39(3) . ?
 C54 H54 0.9500 . ?
 C54 C55 1.38(3) . ?
 C55 H55 0.9500 . ?
 C55 C56 1.39(3) . ?
 C56 H56 0.9500 . ?
 C57 O7 1.26(3) . ?
 C57 O8 1.217(17) . ?
 C57 S3 1.887(17) . ?
 C58 H58 1.0000 . ?
 C58 C59 1.54(2) . ?
 C58 C60 1.67(2) . ?
 C58 O7 1.52(3) . ?
 C59 H59A 0.9800 . ?
 C59 H59B 0.9800 . ?
 C59 H59C 0.9800 . ?
 C60 H60A 0.9800 . ?
 C60 H60B 0.9800 . ?
 C60 H60C 0.9800 . ?
 C61 O5 1.27(3) . ?
 C61 O6 1.27(3) . ?
 C61 S4 1.884(18) . ?
 C62 H62 1.0000 . ?
 C62 C63 1.51(3) . ?
 C62 C64 1.70(3) . ?
 C62 O6 1.50(4) . ?
 C63 H63A 0.9800 . ?
 C63 H63B 0.9800 . ?
 C63 H63C 0.9800 . ?
 C64 H64A 0.9800 . ?
 C64 H64B 0.9800 . ?
 C64 H64C 0.9800 . ?
 C65 O1 1.396(17) . ?
 C65 O2 1.234(17) . ?
 C65 S1 1.849(17) . ?
 C66 H66 1.0000 . ?
 C66 C67 1.61(3) . ?
 C66 C68 1.67(3) . ?
 C66 O1 1.61(4) . ?
 C67 H67A 0.9800 . ?
 C67 H67B 0.9800 . ?
 C67 H67C 0.9800 . ?
 C68 H68A 0.9800 . ?
 C68 H68B 0.9800 . ?
 C68 H68C 0.9800 . ?

loop_
  _geom_angle_atom_site_label_1
  _geom_angle_atom_site_label_2
  _geom_angle_atom_site_label_3
  _geom_angle
  _geom_angle_site_symmetry_1
  _geom_angle_site_symmetry_3
  _geom_angle_publ_flag
 P5 Au1 Au4 103.38(11) . 1_554 ?
 P5 Au1 S1 170.4(3) . . ?
 S1 Au1 Au4 85.4(3) . 1_554 ?
 P2 Au2 Au3 101.15(12) . . ?
 P2 Au2 S2 170.2(3) . . ?
 S2 Au2 Au3 88.1(3) . . ?
 P3 Au3 Au2 103.73(12) . . ?
 P3 Au3 S3 169.9(3) . . ?
 S3 Au3 Au2 85.1(3) . . ?
 P4 Au4 Au1 102.32(11) . 1_556 ?
 P4 Au4 S4 170.0(3) . . ?
 S4 Au4 Au1 86.3(3) . 1_556 ?
 C2 C1 P5 123.0(13) . . ?
 C6 C1 C2 119.3(17) . . ?
 C6 C1 P5 117.7(14) . . ?
 C1 C2 H2 120.4 . . ?
 C3 C2 C1 119.1(19) . . ?
 C3 C2 H2 120.4 . . ?
 C2 C3 H3 119.1 . . ?
 C4 C3 C2 122(2) . . ?
 C4 C3 H3 119.1 . . ?
 C3 C4 H4 120.6 . . ?
 C3 C4 C5 118.8(18) . . ?
 C5 C4 H4 120.6 . . ?
 C4 C5 H5 119.7 . . ?
 C6 C5 C4 120.6(19) . . ?
 C6 C5 H5 119.7 . . ?
 C1 C6 H6 119.8 . . ?
 C5 C6 C1 120.4(19) . . ?
 C5 C6 H6 119.8 . . ?
 C8 C7 P5 120.1(15) . . ?
 C12 C7 C8 119.1(17) . . ?
 C12 C7 P5 120.8(14) . . ?
 C7 C8 H8 120.1 . . ?
 C7 C8 C9 119.8(19) . . ?
 C9 C8 H8 120.1 . . ?
 C8 C9 H9 119.8 . . ?
 C10 C9 C8 120(2) . . ?
 C10 C9 H9 119.8 . . ?
 C9 C10 H10 120.0 . . ?
 C9 C10 C11 120.0(19) . . ?
 C11 C10 H10 120.0 . . ?
 C10 C11 H11 120.7 . . ?
 C10 C11 C12 118.6(19) . . ?
 C12 C11 H11 120.7 . . ?
 C7 C12 C11 122.1(18) . . ?
 C7 C12 H12 119.0 . . ?
 C11 C12 H12 119.0 . . ?
 O3 C13 S2 128(3) . . ?
 O4 C13 O3 105(2) . . ?
 O4 C13 S2 127(3) . . ?
 C15 C14 H14 106.2 . . ?
 C16 C14 H14 106.2 . . ?
 C16 C14 C15 110(2) . . ?
 O4 C14 H14 106.2 . . ?
 O4 C14 C15 118(3) . . ?
 O4 C14 C16 109(2) . . ?
 C14 C15 H15A 109.5 . . ?
 C14 C15 H15B 109.5 . . ?
 C14 C15 H15C 109.5 . . ?
 H15A C15 H15B 109.5 . . ?
 H15A C15 H15C 109.5 . . ?
 H15B C15 H15C 109.5 . . ?
 C14 C16 H16A 109.5 . . ?
 C14 C16 H16B 109.5 . . ?
 C14 C16 H16C 109.5 . . ?
 H16A C16 H16B 109.5 . . ?
 H16A C16 H16C 109.5 . . ?
 H16B C16 H16C 109.5 . . ?
 H17A C17 H17B 107.9 . . ?
 C18 C17 H17A 109.2 . . ?
 C18 C17 H17B 109.2 . . ?
 C18 C17 P5 112.2(12) . . ?
 P5 C17 H17A 109.2 . . ?
 P5 C17 H17B 109.2 . . ?
 C17 C18 H18A 109.1 . . ?
 C17 C18 H18B 109.1 . . ?
 C17 C18 P2 112.4(12) . . ?
 H18A C18 H18B 107.9 . . ?
 P2 C18 H18A 109.1 . . ?
 P2 C18 H18B 109.1 . . ?
 C20 C19 C24 119.7(17) . . ?
 C20 C19 P2 119.6(13) . . ?
 C24 C19 P2 120.5(14) . . ?
 C19 C20 H20 120.6 . . ?
 C19 C20 C21 118.7(17) . . ?
 C21 C20 H20 120.6 . . ?
 C20 C21 H21 120.1 . . ?
 C22 C21 C20 119.7(19) . . ?
 C22 C21 H21 120.1 . . ?
 C21 C22 H22 119.6 . . ?
 C21 C22 C23 120.8(19) . . ?
 C23 C22 H22 119.6 . . ?
 C22 C23 H23 119.7 . . ?
 C24 C23 C22 120.7(19) . . ?
 C24 C23 H23 119.7 . . ?
 C19 C24 H24 119.9 . . ?
 C23 C24 C19 120.3(18) . . ?
 C23 C24 H24 119.9 . . ?
 C26 C25 P2 115.9(14) . . ?
 C30 C25 C26 119.7(18) . . ?
 C30 C25 P2 124.3(15) . . ?
 C25 C26 H26 120.9 . . ?
 C25 C26 C27 118.2(19) . . ?
 C27 C26 H26 120.9 . . ?
 C26 C27 H27 119.7 . . ?
 C28 C27 C26 121(2) . . ?
 C28 C27 H27 119.7 . . ?
 C27 C28 H28 120.4 . . ?
 C29 C28 C27 119.3(19) . . ?
 C29 C28 H28 120.4 . . ?
 C28 C29 H29 120.0 . . ?
 C30 C29 C28 120(2) . . ?
 C30 C29 H29 120.0 . . ?
 C25 C30 H30 119.0 . . ?
 C29 C30 C25 122(2) . . ?
 C29 C30 H30 119.0 . . ?
 C32 C31 P3 116.3(16) . . ?
 C36 C31 C32 120(2) . . ?
 C36 C31 P3 123.6(16) . . ?
 C31 C32 H32 121.0 . . ?
 C31 C32 C33 118(2) . . ?
 C33 C32 H32 121.0 . . ?
 C32 C33 H33 119.0 . . ?
 C34 C33 C32 122(2) . . ?
 C34 C33 H33 119.0 . . ?
 C33 C34 H34 120.5 . . ?
 C35 C34 C33 119(2) . . ?
 C35 C34 H34 120.5 . . ?
 C34 C35 H35 119.7 . . ?
 C34 C35 C36 121(2) . . ?
 C36 C35 H35 119.7 . . ?
 C31 C36 C35 120(2) . . ?
 C31 C36 H36 119.8 . . ?
 C35 C36 H36 119.8 . . ?
 C38 C37 P3 118.8(12) . . ?
 C42 C37 C38 119.9(15) . . ?
 C42 C37 P3 121.3(13) . . ?
 C37 C38 H38 120.4 . . ?
 C39 C38 C37 119.3(15) . . ?
 C39 C38 H38 120.4 . . ?
 C38 C39 H39 120.1 . . ?
 C40 C39 C38 119.9(16) . . ?
 C40 C39 H39 120.1 . . ?
 C39 C40 H40 119.8 . . ?
 C41 C40 C39 120.4(17) . . ?
 C41 C40 H40 119.8 . . ?
 C40 C41 H41 118.9 . . ?
 C40 C41 C42 122.2(18) . . ?
 C42 C41 H41 118.9 . . ?
 C37 C42 C41 118.4(17) . . ?
 C37 C42 H42 120.8 . . ?
 C41 C42 H42 120.8 . . ?
 H43A C43 H43B 107.8 . . ?
 C44 C43 H43A 108.9 . . ?
 C44 C43 H43B 108.9 . . ?
 C44 C43 P3 113.1(12) . . ?
 P3 C43 H43A 108.9 . . ?
 P3 C43 H43B 108.9 . . ?
 C43 C44 H44A 108.8 . . ?
 C43 C44 H44B 108.8 . . ?
 C43 C44 P4 113.9(11) . . ?
 H44A C44 H44B 107.7 . . ?
 P4 C44 H44A 108.8 . . ?
 P4 C44 H44B 108.8 . . ?
 C46 C45 P4 117.7(13) . . ?
 C50 C45 C46 119.2(16) . . ?
 C50 C45 P4 123.1(13) . . ?
 C45 C46 H46 119.7 . . ?
 C45 C46 C47 120.6(19) . . ?
 C47 C46 H46 119.7 . . ?
 C46 C47 H47 120.3 . . ?
 C46 C47 C48 119(2) . . ?
 C48 C47 H47 120.3 . . ?
 C47 C48 H48 120.1 . . ?
 C49 C48 C47 119.8(19) . . ?
 C49 C48 H48 120.1 . . ?
 C48 C49 H49 119.8 . . ?
 C48 C49 C50 120(2) . . ?
 C50 C49 H49 119.8 . . ?
 C45 C50 H50 119.7 . . ?
 C49 C50 C45 120.6(18) . . ?
 C49 C50 H50 119.7 . . ?
 C52 C51 P4 120.7(14) . . ?
 C56 C51 C52 119.2(17) . . ?
 C56 C51 P4 120.0(14) . . ?
 C51 C52 H52 119.9 . . ?
 C51 C52 C53 120.2(19) . . ?
 C53 C52 H52 119.9 . . ?
 C52 C53 H53 120.0 . . ?
 C54 C53 C52 120.0(19) . . ?
 C54 C53 H53 120.0 . . ?
 C53 C54 H54 120.5 . . ?
 C55 C54 C53 118.9(17) . . ?
 C55 C54 H54 120.5 . . ?
 C54 C55 H55 119.7 . . ?
 C54 C55 C56 120.7(19) . . ?
 C56 C55 H55 119.7 . . ?
 C51 C56 C55 120.9(19) . . ?
 C51 C56 H56 119.6 . . ?
 C55 C56 H56 119.6 . . ?
 O7 C57 S3 116.1(17) . . ?
 O8 C57 O7 116(2) . . ?
 O8 C57 S3 126.1(19) . . ?
 C59 C58 H58 108.7 . . ?
 C59 C58 C60 117.8(14) . . ?
 C60 C58 H58 108.7 . . ?
 O7 C58 H58 108.7 . . ?
 O7 C58 C59 100.4(14) . . ?
 O7 C58 C60 112.1(15) . . ?
 C58 C59 H59A 109.5 . . ?
 C58 C59 H59B 109.5 . . ?
 C58 C59 H59C 109.5 . . ?
 H59A C59 H59B 109.5 . . ?
 H59A C59 H59C 109.5 . . ?
 H59B C59 H59C 109.5 . . ?
 C58 C60 H60A 109.5 . . ?
 C58 C60 H60B 109.5 . . ?
 C58 C60 H60C 109.5 . . ?
 H60A C60 H60B 109.5 . . ?
 H60A C60 H60C 109.5 . . ?
 H60B C60 H60C 109.5 . . ?
 O5 C61 O6 118(2) . . ?
 O5 C61 S4 127(2) . . ?
 O6 C61 S4 114.9(19) . . ?
 C63 C62 H62 108.4 . . ?
 C63 C62 C64 115(2) . . ?
 C64 C62 H62 108.4 . . ?
 O6 C62 H62 108.4 . . ?
 O6 C62 C63 103(2) . . ?
 O6 C62 C64 113(2) . . ?
 C62 C63 H63A 109.5 . . ?
 C62 C63 H63B 109.5 . . ?
 C62 C63 H63C 109.5 . . ?
 H63A C63 H63B 109.5 . . ?
 H63A C63 H63C 109.5 . . ?
 H63B C63 H63C 109.5 . . ?
 C62 C64 H64A 109.5 . . ?
 C62 C64 H64B 109.5 . . ?
 C62 C64 H64C 109.5 . . ?
 H64A C64 H64B 109.5 . . ?
 H64A C64 H64C 109.5 . . ?
 H64B C64 H64C 109.5 . . ?
 O1 C65 S1 115.2(17) . . ?
 O2 C65 O1 114.4(19) . . ?
 O2 C65 S1 130.0(18) . . ?
 C67 C66 H66 110.2 . . ?
 C67 C66 C68 113(2) . . ?
 C67 C66 O1 96.5(18) . . ?
 C68 C66 H66 110.2 . . ?
 O1 C66 H66 110.2 . . ?
 O1 C66 C68 116(2) . . ?
 C66 C67 H67A 109.5 . . ?
 C66 C67 H67B 109.5 . . ?
 C66 C67 H67C 109.5 . . ?
 H67A C67 H67B 109.5 . . ?
 H67A C67 H67C 109.5 . . ?
 H67B C67 H67C 109.5 . . ?
 C66 C68 H68A 109.5 . . ?
 C66 C68 H68B 109.5 . . ?
 C66 C68 H68C 109.5 . . ?
 H68A C68 H68B 109.5 . . ?
 H68A C68 H68C 109.5 . . ?
 H68B C68 H68C 109.5 . . ?
 C65 O1 C66 120.1(19) . . ?
 C13 O4 C14 137(3) . . ?
 C61 O6 C62 121(2) . . ?
 C57 O7 C58 120.3(19) . . ?
 C18 P2 Au2 111.4(6) . . ?
 C18 P2 C19 105.9(8) . . ?
 C19 P2 Au2 111.9(6) . . ?
 C25 P2 Au2 117.0(6) . . ?
 C25 P2 C18 105.2(8) . . ?
 C25 P2 C19 104.6(8) . . ?
 C31 P3 Au3 113.7(6) . . ?
 C31 P3 C37 103.7(8) . . ?
 C31 P3 C43 107.9(8) . . ?
 C37 P3 Au3 116.0(6) . . ?
 C37 P3 C43 102.5(7) . . ?
 C43 P3 Au3 112.0(6) . . ?
 C44 P4 Au4 112.3(6) . . ?
 C44 P4 C51 103.8(8) . . ?
 C45 P4 Au4 112.9(5) . . ?
 C45 P4 C44 107.2(8) . . ?
 C45 P4 C51 105.1(8) . . ?
 C51 P4 Au4 114.8(6) . . ?
 C1 P5 Au1 116.6(6) . . ?
 C1 P5 C17 105.3(8) . . ?
 C7 P5 Au1 113.2(6) . . ?
 C7 P5 C1 103.3(8) . . ?
 C7 P5 C17 106.6(9) . . ?
 C17 P5 Au1 110.9(6) . . ?
 C65 S1 Au1 93.0(7) . . ?
 C13 S2 Au2 95.9(13) . . ?
 C57 S3 Au3 95.6(7) . . ?
 C61 S4 Au4 94.1(9) . . ?

loop_
  _geom_torsion_atom_site_label_1
  _geom_torsion_atom_site_label_2
  _geom_torsion_atom_site_label_3
  _geom_torsion_atom_site_label_4
  _geom_torsion
  _geom_torsion_site_symmetry_1
  _geom_torsion_site_symmetry_2
  _geom_torsion_site_symmetry_3
  _geom_torsion_site_symmetry_4
  _geom_torsion_publ_flag
 C1 C2 C3 C4 1(3) . . . . ?
 C2 C1 C6 C5 -1(3) . . . . ?
 C2 C1 P5 Au1 -127.8(14) . . . . ?
 C2 C1 P5 C7 107.3(16) . . . . ?
 C2 C1 P5 C17 -4.3(18) . . . . ?
 C2 C3 C4 C5 -1(3) . . . . ?
 C3 C4 C5 C6 0(3) . . . . ?
 C4 C5 C6 C1 1(3) . . . . ?
 C6 C1 C2 C3 0(3) . . . . ?
 C6 C1 P5 Au1 55.6(15) . . . . ?
 C6 C1 P5 C7 -69.3(15) . . . . ?
 C6 C1 P5 C17 179.1(14) . . . . ?
 C7 C8 C9 C10 1(3) . . . . ?
 C8 C7 C12 C11 0(3) . . . . ?
 C8 C7 P5 Au1 9.8(17) . . . . ?
 C8 C7 P5 C1 136.8(15) . . . . ?
 C8 C7 P5 C17 -112.5(16) . . . . ?
 C8 C9 C10 C11 -1(3) . . . . ?
 C9 C10 C11 C12 1(3) . . . . ?
 C10 C11 C12 C7 0(3) . . . . ?
 C12 C7 C8 C9 0(3) . . . . ?
 C12 C7 P5 Au1 -168.9(13) . . . . ?
 C12 C7 P5 C1 -41.9(17) . . . . ?
 C12 C7 P5 C17 68.9(17) . . . . ?
 C15 C14 O4 C13 66(6) . . . . ?
 C16 C14 O4 C13 -167(5) . . . . ?
 C17 C18 P2 Au2 49.5(13) . . . . ?
 C17 C18 P2 C19 -72.3(14) . . . . ?
 C17 C18 P2 C25 177.2(12) . . . . ?
 C18 C17 P5 Au1 -50.5(14) . . . . ?
 C18 C17 P5 C1 -177.4(12) . . . . ?
 C18 C17 P5 C7 73.2(14) . . . . ?
 C19 C20 C21 C22 0(3) . . . . ?
 C20 C19 C24 C23 2(3) . . . . ?
 C20 C19 P2 Au2 166.3(13) . . . . ?
 C20 C19 P2 C18 -72.1(16) . . . . ?
 C20 C19 P2 C25 38.8(17) . . . . ?
 C20 C21 C22 C23 0(3) . . . . ?
 C21 C22 C23 C24 2(3) . . . . ?
 C22 C23 C24 C19 -3(3) . . . . ?
 C24 C19 C20 C21 -1(3) . . . . ?
 C24 C19 P2 Au2 -9.3(16) . . . . ?
 C24 C19 P2 C18 112.3(15) . . . . ?
 C24 C19 P2 C25 -136.9(15) . . . . ?
 C25 C26 C27 C28 -1(3) . . . . ?
 C26 C25 C30 C29 0(3) . . . . ?
 C26 C25 P2 Au2 -58.3(15) . . . . ?
 C26 C25 P2 C18 177.5(13) . . . . ?
 C26 C25 P2 C19 66.1(15) . . . . ?
 C26 C27 C28 C29 -2(3) . . . . ?
 C27 C28 C29 C30 3(3) . . . . ?
 C28 C29 C30 C25 -2(4) . . . . ?
 C30 C25 C26 C27 2(3) . . . . ?
 C30 C25 P2 Au2 123.8(16) . . . . ?
 C30 C25 P2 C18 -0.4(19) . . . . ?
 C30 C25 P2 C19 -111.8(18) . . . . ?
 C31 C32 C33 C34 -1(3) . . . . ?
 C32 C31 C36 C35 1(3) . . . . ?
 C32 C31 P3 Au3 -55.8(15) . . . . ?
 C32 C31 P3 C37 71.0(15) . . . . ?
 C32 C31 P3 C43 179.3(14) . . . . ?
 C32 C33 C34 C35 1(3) . . . . ?
 C33 C34 C35 C36 0(4) . . . . ?
 C34 C35 C36 C31 -1(4) . . . . ?
 C36 C31 C32 C33 0(3) . . . . ?
 C36 C31 P3 Au3 123.8(16) . . . . ?
 C36 C31 P3 C37 -109.3(17) . . . . ?
 C36 C31 P3 C43 -1.0(19) . . . . ?
 C37 C38 C39 C40 2(3) . . . . ?
 C38 C37 C42 C41 -1(3) . . . . ?
 C38 C37 P3 Au3 -16.8(15) . . . . ?
 C38 C37 P3 C31 -142.2(13) . . . . ?
 C38 C37 P3 C43 105.6(14) . . . . ?
 C38 C39 C40 C41 -2(3) . . . . ?
 C39 C40 C41 C42 1(3) . . . . ?
 C40 C41 C42 C37 1(3) . . . . ?
 C42 C37 C38 C39 0(2) . . . . ?
 C42 C37 P3 Au3 165.0(13) . . . . ?
 C42 C37 P3 C31 39.6(16) . . . . ?
 C42 C37 P3 C43 -72.6(16) . . . . ?
 C43 C44 P4 Au4 46.7(14) . . . . ?
 C43 C44 P4 C45 -77.9(13) . . . . ?
 C43 C44 P4 C51 171.2(12) . . . . ?
 C44 C43 P3 Au3 -47.4(13) . . . . ?
 C44 C43 P3 C31 78.4(14) . . . . ?
 C44 C43 P3 C37 -172.5(12) . . . . ?
 C45 C46 C47 C48 0(3) . . . . ?
 C46 C45 C50 C49 -1(3) . . . . ?
 C46 C45 P4 Au4 59.2(13) . . . . ?
 C46 C45 P4 C44 -176.6(13) . . . . ?
 C46 C45 P4 C51 -66.6(14) . . . . ?
 C46 C47 C48 C49 -2(3) . . . . ?
 C47 C48 C49 C50 2(3) . . . . ?
 C48 C49 C50 C45 0(3) . . . . ?
 C50 C45 C46 C47 2(3) . . . . ?
 C50 C45 P4 Au4 -122.7(14) . . . . ?
 C50 C45 P4 C44 1.5(16) . . . . ?
 C50 C45 P4 C51 111.5(15) . . . . ?
 C51 C52 C53 C54 -1(3) . . . . ?
 C52 C51 C56 C55 0(3) . . . . ?
 C52 C51 P4 Au4 -163.9(14) . . . . ?
 C52 C51 P4 C44 73.1(17) . . . . ?
 C52 C51 P4 C45 -39.3(17) . . . . ?
 C52 C53 C54 C55 2(3) . . . . ?
 C53 C54 C55 C56 -2(3) . . . . ?
 C54 C55 C56 C51 1(3) . . . . ?
 C56 C51 C52 C53 0(3) . . . . ?
 C56 C51 P4 Au4 19.4(17) . . . . ?
 C56 C51 P4 C44 -103.5(16) . . . . ?
 C56 C51 P4 C45 144.0(15) . . . . ?
 C59 C58 O7 C57 -151(2) . . . . ?
 C60 C58 O7 C57 83(3) . . . . ?
 C63 C62 O6 C61 166(3) . . . . ?
 C64 C62 O6 C61 -69(3) . . . . ?
 C67 C66 O1 C65 172(2) . . . . ?
 C68 C66 O1 C65 -69(3) . . . . ?
 O1 C65 S1 Au1 171(2) . . . . ?
 O2 C65 O1 C66 -6(4) . . . . ?
 O2 C65 S1 Au1 -1(3) . . . . ?
 O3 C13 O4 C14 5(7) . . . . ?
 O3 C13 S2 Au2 9(4) . . . . ?
 O4 C13 S2 Au2 -174(4) . . . . ?
 O5 C61 O6 C62 -2(4) . . . . ?
 O5 C61 S4 Au4 -5(3) . . . . ?
 O6 C61 S4 Au4 171(2) . . . . ?
 O7 C57 S3 Au3 175(2) . . . . ?
 O8 C57 O7 C58 -14(4) . . . . ?
 O8 C57 S3 Au3 8(3) . . . . ?
 P2 C19 C20 C21 -176.5(14) . . . . ?
 P2 C19 C24 C23 178.1(15) . . . . ?
 P2 C25 C26 C27 -176.0(14) . . . . ?
 P2 C25 C30 C29 177.3(18) . . . . ?
 P3 C31 C32 C33 180.0(14) . . . . ?
 P3 C31 C36 C35 -178.9(17) . . . . ?
 P3 C37 C38 C39 -177.9(13) . . . . ?
 P3 C37 C42 C41 176.7(14) . . . . ?
 P3 C43 C44 P4 -179.1(9) . . . . ?
 P4 C45 C46 C47 179.7(14) . . . . ?
 P4 C45 C50 C49 -179.4(15) . . . . ?
 P4 C51 C52 C53 -177.0(16) . . . . ?
 P4 C51 C56 C55 176.7(16) . . . . ?
 P5 C1 C2 C3 -176.9(15) . . . . ?
 P5 C1 C6 C5 175.7(14) . . . . ?
 P5 C7 C8 C9 -178.7(15) . . . . ?
 P5 C7 C12 C11 178.5(16) . . . . ?
 P5 C17 C18 P2 -179.5(9) . . . . ?
 S1 C65 O1 C66 -179(2) . . . . ?
 S2 C13 O4 C14 -173(3) . . . . ?
 S3 C57 O7 C58 178.7(15) . . . . ?
 S4 C61 O6 C62 -178(2) . . . . ?

_shelx_res_file
;
TITL shelxt_a.res in P2(1)/n
    shelxt_a.res
    created by SHELXL-2018/3 at 14:48:07 on 05-Dec-2021
REM Old TITL 20wd_wvz_wd10_audppemtc_0m_a.res in P2(1)/n
REM SHELXT solution in P2(1)/n: R1 0.197, Rweak 0.012, Alpha 0.089
REM <I/s> 1.048 for 229 systematic absences, Orientation as input
REM Formula found by SHELXT: C64 N10 O2 S2 Cl2 Au4 P4
CELL 0.71073 11.7462 39.1972 15.6529 90 107.882 90
ZERR 8 0.0009 0.0033 0.0015 0 0.004 0
LATT 1
SYMM 0.5-X,0.5+Y,0.5-Z
SFAC C H Au O P S
UNIT 272 304 16 32 16 16
DFIX 1.81 S2 C13
DFIX 1.81 S4 C61
DFIX 1.2 C57 O8
DFIX 1.78 C57 S3
DFIX 1.2 C65 O2
DFIX 1.78 C65 S1
DFIX 1.4 C65 O1
EADP C13 O3 O4
EADP S1 C65 O1 O2
EADP C61 S4 O5 O6
EADP O7 C57 O8 S3
EADP C58 C60 C59

L.S. 90
PLAN  10
SIZE 0.11 0.18 0.24
TEMP -123.13
CONF
BOND
LIST 6
MORE -1
BOND $H
fmap 2
acta
TWIN -1 0 0 0 -1 0 0 0 1 2
OMIT 2 0 2
OMIT -3 42 -1
OMIT 2 4 2
OMIT -1 6 0
OMIT -1 14 0
OMIT 1 2 1
REM <olex2.extras>
REM <HklSrc "%.\\shelxt_a.hkl">
REM </olex2.extras>

WGHT    0.038300  443.775909
BASF   0.00155
FVAR       0.05776
AU1   3    0.211689    0.187488   -0.144664    11.00000    0.02959    0.02646 =
         0.03963   -0.00094    0.00520    0.00218
AU2   3    0.266728    0.060656    0.162696    11.00000    0.02258    0.02493 =
         0.05262    0.00526    0.00727    0.00207
AU3   3    0.232274    0.058714    0.368141    11.00000    0.01874    0.02562 =
         0.05344   -0.00475    0.00357   -0.00007
AU4   3    0.244548    0.193128    0.649745    11.00000    0.03138    0.02805 =
         0.04101   -0.00136    0.00450   -0.00647
C1    1    0.400078    0.120612   -0.150358    11.00000    0.02313    0.03044 =
         0.01934   -0.00042    0.00525   -0.00130
C2    1    0.396222    0.085141   -0.151720    11.00000    0.04372    0.04634 =
         0.03355    0.00214    0.01852    0.00228
AFIX  43
H2    2    0.357489    0.073100   -0.115822    11.00000   -1.20000
AFIX   0
C3    1    0.448930    0.067841   -0.205422    11.00000    0.05095    0.03238 =
         0.05489   -0.00806   -0.00028    0.01163
AFIX  43
H3    2    0.444808    0.043636   -0.207322    11.00000   -1.20000
AFIX   0
C4    1    0.507194    0.084356   -0.256279    11.00000    0.04520    0.05552 =
         0.02528   -0.00862    0.01314    0.01202
AFIX  43
H4    2    0.544335    0.071878   -0.292483    11.00000   -1.20000
AFIX   0
C5    1    0.511320    0.119838   -0.254237    11.00000    0.03555    0.05688 =
         0.02905    0.00076    0.01639    0.00787
AFIX  43
H5    2    0.552129    0.131679   -0.289048    11.00000   -1.20000
AFIX   0
C6    1    0.457869    0.137598   -0.203244    11.00000    0.03485    0.04464 =
         0.02540   -0.00091    0.01194   -0.00457
AFIX  43
H6    2    0.459750    0.161827   -0.203496    11.00000   -1.20000
AFIX   0
C7    1    0.471633    0.161603    0.005111    11.00000    0.02931    0.03814 =
         0.01968   -0.00425    0.00443   -0.00847
C8    1    0.477457    0.195186    0.032412    11.00000    0.04228    0.03506 =
         0.03903   -0.00261    0.01097    0.00065
AFIX  43
H8    2    0.411373    0.209978    0.008021    11.00000   -1.20000
AFIX   0
C9    1    0.581122    0.207431    0.096229    11.00000    0.04163    0.04219 =
         0.04176   -0.00986    0.00526   -0.01302
AFIX  43
H9    2    0.584808    0.230508    0.115441    11.00000   -1.20000
AFIX   0
C10   1    0.678229    0.186099    0.131462    11.00000    0.05002    0.03238 =
         0.04449    0.00428   -0.00163   -0.00533
AFIX  43
H10   2    0.748732    0.194643    0.173986    11.00000   -1.20000
AFIX   0
C11   1    0.672470    0.152241    0.104611    11.00000    0.04183    0.03418 =
         0.05147    0.00273   -0.00772    0.00310
AFIX  43
H11   2    0.738132    0.137297    0.128907    11.00000   -1.20000
AFIX   0
C12   1    0.568449    0.140625    0.041314    11.00000    0.03990    0.03049 =
         0.03543   -0.00285    0.00772   -0.00247
AFIX  43
H12   2    0.564153    0.117488    0.022514    11.00000   -1.20000
AFIX   0
C13   1    0.501659    0.033370    0.139184    11.00000    0.08851    0.09814 =
         0.19779   -0.00287    0.10409   -0.00958
C14   1    0.678701    0.026143    0.087220    11.00000    0.05419    0.05817 =
         0.09564    0.01228   -0.00743   -0.00903
AFIX  13
H14   2    0.634206    0.031876    0.023436    11.00000   -1.20000
AFIX   0
C15   1    0.769439    0.057558    0.125201    11.00000    0.02694    0.06544 =
         0.06713   -0.04240   -0.00170   -0.01517
AFIX 137
H15A  2    0.782347    0.060136    0.189764    11.00000   -1.50000
H15B  2    0.734910    0.078615    0.094195    11.00000   -1.50000
H15C  2    0.846031    0.052956    0.114655    11.00000   -1.50000
AFIX   0
C16   1    0.751755   -0.008067    0.084187    11.00000    0.06620    0.01203 =
         0.11505   -0.00038    0.06903   -0.00544
AFIX 137
H16A  2    0.727948   -0.016965    0.022717    11.00000   -1.50000
H16B  2    0.734397   -0.025112    0.124280    11.00000   -1.50000
H16C  2    0.837652   -0.003070    0.103708    11.00000   -1.50000
AFIX   0
C17   1    0.269150    0.115168   -0.021091    11.00000    0.03687    0.03366 =
         0.03759    0.00892    0.01829    0.00439
AFIX  23
H17A  2    0.209061    0.101633   -0.066714    11.00000   -1.20000
H17B  2    0.330700    0.099239    0.014927    11.00000   -1.20000
AFIX   0
C18   1    0.208479    0.132742    0.040058    11.00000    0.02322    0.03301 =
         0.03217   -0.00482    0.00677   -0.01054
AFIX  23
H18A  2    0.146494    0.148527    0.003911    11.00000   -1.20000
H18B  2    0.268459    0.146448    0.085300    11.00000   -1.20000
AFIX   0
C19   1    0.005705    0.085839    0.010597    11.00000    0.02997    0.02950 =
         0.03724   -0.00461    0.01824   -0.00835
C20   1   -0.093444    0.106721   -0.023020    11.00000    0.02822    0.02479 =
         0.04029   -0.00324    0.00612   -0.00257
AFIX  43
H20   2   -0.091696    0.129836   -0.004418    11.00000   -1.20000
AFIX   0
C21   1   -0.197538    0.092870   -0.085748    11.00000    0.03314    0.05981 =
         0.04121    0.00430    0.01067    0.00747
AFIX  43
H21   2   -0.266478    0.106690   -0.109493    11.00000   -1.20000
AFIX   0
C22   1   -0.198133    0.059683   -0.111735    11.00000    0.03948    0.04154 =
         0.03143    0.00085    0.00371   -0.01634
AFIX  43
H22   2   -0.268045    0.050418   -0.153385    11.00000   -1.20000
AFIX   0
C23   1   -0.099266    0.039541   -0.078571    11.00000    0.05759    0.02888 =
         0.04058    0.00494    0.01927    0.00074
AFIX  43
H23   2   -0.100344    0.016674   -0.098920    11.00000   -1.20000
AFIX   0
C24   1    0.000791    0.051949   -0.016618    11.00000    0.03635    0.01719 =
         0.04416    0.00248    0.01092    0.00092
AFIX  43
H24   2    0.067449    0.037384    0.008073    11.00000   -1.20000
AFIX   0
C25   1    0.079841    0.128338    0.169962    11.00000    0.02111    0.03391 =
         0.03318    0.00036    0.00205    0.00389
C26   1    0.017738    0.110834    0.218725    11.00000    0.04005    0.02648 =
         0.03450    0.00419    0.00236    0.00348
AFIX  43
H26   2    0.012208    0.086652    0.216447    11.00000   -1.20000
AFIX   0
C27   1   -0.036891    0.129938    0.271714    11.00000    0.04048    0.08197 =
         0.02780    0.00216    0.01494    0.01131
AFIX  43
H27   2   -0.080931    0.118544    0.304926    11.00000   -1.20000
AFIX   0
C28   1   -0.026929    0.165420    0.275876    11.00000    0.04634    0.04788 =
         0.03376   -0.00554    0.00613    0.01889
AFIX  43
H28   2   -0.065554    0.178227    0.310497    11.00000   -1.20000
AFIX   0
C29   1    0.039101    0.181572    0.229534    11.00000    0.06889    0.03763 =
         0.05165   -0.00548    0.03332    0.00505
AFIX  43
H29   2    0.049750    0.205600    0.234280    11.00000   -1.20000
AFIX   0
C30   1    0.089530    0.163234    0.176648    11.00000    0.05273    0.03487 =
         0.05366   -0.00740    0.02683   -0.00358
AFIX  43
H30   2    0.132755    0.174933    0.143337    11.00000   -1.20000
AFIX   0
C31   1    0.393312    0.130977    0.374727    11.00000    0.02214    0.03514 =
         0.03331    0.00067   -0.00119    0.00003
C32   1    0.438005    0.119584    0.306855    11.00000    0.03460    0.08146 =
         0.02198   -0.00764    0.00517   -0.01591
AFIX  43
H32   2    0.449819    0.095962    0.298939    11.00000   -1.20000
AFIX   0
C33   1    0.464987    0.144120    0.250596    11.00000    0.03998    0.07618 =
         0.02437   -0.01093    0.00663   -0.00825
AFIX  43
H33   2    0.496807    0.136814    0.204708    11.00000   -1.20000
AFIX   0
C34   1    0.446627    0.178662    0.259956    11.00000    0.04420    0.07509 =
         0.03514    0.01258    0.01099   -0.00601
AFIX  43
H34   2    0.464587    0.194750    0.220552    11.00000   -1.20000
AFIX   0
C35   1    0.402538    0.189200    0.326341    11.00000    0.05429    0.04071 =
         0.08814    0.02718    0.03324    0.00713
AFIX  43
H35   2    0.389372    0.212814    0.333230    11.00000   -1.20000
AFIX   0
C36   1    0.376305    0.165432    0.384825    11.00000    0.04433    0.04012 =
         0.06696    0.01579    0.03015    0.00682
AFIX  43
H36   2    0.346714    0.173098    0.431564    11.00000   -1.20000
AFIX   0
C37   1    0.505605    0.083638    0.511015    11.00000    0.01937    0.02837 =
         0.02519   -0.00222    0.01040    0.00655
C38   1    0.521118    0.048427    0.531198    11.00000    0.02892    0.00982 =
         0.03567   -0.00686    0.01065   -0.00017
AFIX  43
H38   2    0.456608    0.032966    0.508465    11.00000   -1.20000
AFIX   0
C39   1    0.631117    0.036773    0.584335    11.00000    0.03861    0.01470 =
         0.04104   -0.00029    0.00888    0.01081
AFIX  43
H39   2    0.643202    0.013119    0.597135    11.00000   -1.20000
AFIX   0
C40   1    0.723265    0.059546    0.618724    11.00000    0.03790    0.03789 =
         0.03214   -0.00593   -0.00039    0.01541
AFIX  43
H40   2    0.798048    0.051622    0.656869    11.00000   -1.20000
AFIX   0
C41   1    0.707971    0.092680    0.598708    11.00000    0.02530    0.04496 =
         0.04176   -0.00541    0.01132   -0.00741
AFIX  43
H41   2    0.773044    0.107864    0.622532    11.00000   -1.20000
AFIX   0
C42   1    0.599621    0.105752    0.543972    11.00000    0.02560    0.02587 =
         0.04640    0.00013    0.00836   -0.00064
AFIX  43
H42   2    0.591071    0.129372    0.529838    11.00000   -1.20000
AFIX   0
C43   1    0.304995    0.120047    0.528684    11.00000    0.02819    0.03024 =
         0.02495    0.00876    0.00788    0.00934
AFIX  23
H43A  2    0.313240    0.104300    0.579680    11.00000   -1.20000
H43B  2    0.355406    0.140294    0.551856    11.00000   -1.20000
AFIX   0
C44   1    0.173786    0.131380    0.491422    11.00000    0.02541    0.02939 =
         0.02780   -0.00691    0.00238   -0.00533
AFIX  23
H44A  2    0.123485    0.111048    0.468999    11.00000   -1.20000
H44B  2    0.165527    0.146786    0.439748    11.00000   -1.20000
AFIX   0
C45   1    0.085549    0.120613    0.645443    11.00000    0.01822    0.03079 =
         0.01583   -0.00073    0.00418    0.00131
C46   1    0.035701    0.130994    0.709938    11.00000    0.02593    0.04806 =
         0.01762   -0.00319    0.00376    0.00729
AFIX  43
H46   2    0.019689    0.154506    0.715526    11.00000   -1.20000
AFIX   0
C47   1    0.008778    0.107595    0.766519    11.00000    0.03354    0.10022 =
         0.02414    0.00082    0.01040   -0.00627
AFIX  43
H47   2   -0.025482    0.114872    0.811092    11.00000   -1.20000
AFIX   0
C48   1    0.032095    0.073428    0.757807    11.00000    0.04272    0.05606 =
         0.05983    0.03466    0.00588   -0.01188
AFIX  43
H48   2    0.015687    0.057128    0.797386    11.00000   -1.20000
AFIX   0
C49   1    0.078671    0.063185    0.692314    11.00000    0.04529    0.04626 =
         0.03863    0.00598    0.01330   -0.00419
AFIX  43
H49   2    0.092557    0.039625    0.685293    11.00000   -1.20000
AFIX   0
C50   1    0.105577    0.086571    0.636611    11.00000    0.03542    0.02736 =
         0.03922    0.00095    0.01660   -0.00480
AFIX  43
H50   2    0.138443    0.079138    0.591400    11.00000   -1.20000
AFIX   0
C51   1   -0.028172    0.169282    0.506393    11.00000    0.02356    0.02889 =
         0.03487   -0.00379    0.00918    0.00415
C52   1   -0.124024    0.147298    0.473994    11.00000    0.03090    0.03924 =
         0.04170    0.00696    0.00416   -0.00412
AFIX  43
H52   2   -0.115043    0.123752    0.488928    11.00000   -1.20000
AFIX   0
C53   1   -0.234742    0.159710    0.419005    11.00000    0.02574    0.06426 =
         0.04624    0.01973   -0.00537   -0.01167
AFIX  43
H53   2   -0.300045    0.144498    0.396377    11.00000   -1.20000
AFIX   0
C54   1   -0.248567    0.194168    0.397817    11.00000    0.02786    0.04972 =
         0.03335    0.00601   -0.00541    0.01626
AFIX  43
H54   2   -0.323683    0.202852    0.362266    11.00000   -1.20000
AFIX   0
C55   1   -0.151388    0.215618    0.429244    11.00000    0.05288    0.02670 =
         0.04781   -0.00119    0.01348    0.01216
AFIX  43
H55   2   -0.159034    0.239090    0.413381    11.00000   -1.20000
AFIX   0
C56   1   -0.042345    0.203188    0.483932    11.00000    0.03223    0.03568 =
         0.04834    0.00132    0.00693    0.00696
AFIX  43
H56   2    0.023127    0.218386    0.505994    11.00000   -1.20000
AFIX   0
C57   1   -0.015482    0.033764    0.376137    11.00000    0.05960    0.03988 =
         0.11675    0.00376   -0.02565   -0.01632
C58   1   -0.201479    0.028300    0.410538    11.00000    0.02418    0.01907 =
         0.05951    0.00217    0.01866    0.00060
AFIX  13
H58   2   -0.153525    0.031478    0.474928    11.00000   -1.20000
AFIX   0
C59   1   -0.271498   -0.005315    0.401444    11.00000    0.02418    0.01907 =
         0.05951    0.00217    0.01866    0.00060
AFIX 137
H59A  2   -0.339702   -0.002191    0.424278    11.00000   -1.50000
H59B  2   -0.218958   -0.023180    0.436145    11.00000   -1.50000
H59C  2   -0.300492   -0.012014    0.338109    11.00000   -1.50000
AFIX   0
C60   1   -0.279133    0.064058    0.373887    11.00000    0.02418    0.01907 =
         0.05951    0.00217    0.01866    0.00060
AFIX 137
H60A  2   -0.291536    0.066669    0.309396    11.00000   -1.50000
H60B  2   -0.234488    0.083728    0.406016    11.00000   -1.50000
H60C  2   -0.356818    0.062704    0.384800    11.00000   -1.50000
AFIX   0
C61   1    0.494793    0.215838    0.647537    11.00000    0.07748    0.04679 =
         0.10301    0.00146   -0.01382   -0.02385
C62   1    0.672214    0.225166    0.603497    11.00000    0.05634    0.06527 =
         0.11046   -0.00886    0.03254   -0.01262
AFIX  13
H62   2    0.625724    0.221328    0.539057    11.00000   -1.20000
AFIX   0
C63   1    0.744740    0.257550    0.609988    11.00000    0.02899    0.00865 =
         0.07019   -0.01262    0.02755   -0.00606
AFIX 137
H63A  2    0.767921    0.266113    0.671773    11.00000   -1.50000
H63B  2    0.696505    0.274798    0.569420    11.00000   -1.50000
H63C  2    0.816721    0.252691    0.592970    11.00000   -1.50000
AFIX   0
C64   1    0.753576    0.189431    0.643124    11.00000    0.01974    0.03273 =
         0.07960    0.00550    0.00335    0.00977
AFIX 137
H64A  2    0.796511    0.182439    0.601316    11.00000   -1.50000
H64B  2    0.699854    0.171045    0.648855    11.00000   -1.50000
H64C  2    0.811216    0.194230    0.702022    11.00000   -1.50000
AFIX   0
C65   1   -0.023949    0.211095   -0.124653    11.00000    0.06446    0.04354 =
         0.13941   -0.00965   -0.02539    0.01398
C66   1   -0.202569    0.220181   -0.060788    11.00000    0.06800    0.04380 =
         0.12961    0.01593    0.02979    0.00642
AFIX  13
H66   2   -0.152308    0.217335    0.003159    11.00000   -1.20000
AFIX   0
C67   1   -0.278838    0.255021   -0.072602    11.00000    0.04004    0.01661 =
         0.06356   -0.00778    0.04130   -0.00326
AFIX 137
H67A  2   -0.320227    0.258924   -0.136458    11.00000   -1.50000
H67B  2   -0.224872    0.274162   -0.048461    11.00000   -1.50000
H67C  2   -0.337770    0.253152   -0.040066    11.00000   -1.50000
AFIX   0
C68   1   -0.288339    0.185929   -0.095118    11.00000    0.02334    0.01779 =
         0.06365   -0.01610   -0.00039    0.00227
AFIX 137
H68A  2   -0.337352    0.182113   -0.055390    11.00000   -1.50000
H68B  2   -0.237604    0.165944   -0.093551    11.00000   -1.50000
H68C  2   -0.340528    0.189575   -0.156613    11.00000   -1.50000
AFIX   0
O1    4   -0.120262    0.231427   -0.121799    11.00000    0.06446    0.04354 =
         0.13941   -0.00965   -0.02539    0.01398
O2    4   -0.003797    0.186707   -0.072272    11.00000    0.06446    0.04354 =
         0.13941   -0.00965   -0.02539    0.01398
O3    4    0.488279    0.060876    0.090399    11.00000    0.08851    0.09814 =
         0.19779   -0.00287    0.10409   -0.00958
O4    4    0.589301    0.019230    0.130535    11.00000    0.08851    0.09814 =
         0.19779   -0.00287    0.10409   -0.00958
O5    4    0.477206    0.190235    0.595709    11.00000    0.07748    0.04679 =
         0.10301    0.00146   -0.01382   -0.02385
O6    4    0.586084    0.234262    0.653536    11.00000    0.07748    0.04679 =
         0.10301    0.00146   -0.01382   -0.02385
O7    4   -0.116814    0.019722    0.357233    11.00000    0.05960    0.03988 =
         0.11675    0.00376   -0.02565   -0.01632
O8    4    0.000386    0.058450    0.425517    11.00000    0.05960    0.03988 =
         0.11675    0.00376   -0.02565   -0.01632
P2    5    0.139433    0.102526    0.097360    11.00000    0.01978    0.02350 =
         0.03552    0.00150    0.00617   -0.00264
P3    5    0.360123    0.098713    0.444694    11.00000    0.01727    0.02367 =
         0.03497   -0.00270    0.00406    0.00394
P4    5    0.117732    0.153192    0.573177    11.00000    0.02646    0.02427 =
         0.02574   -0.00172    0.00935   -0.00039
P5    5    0.340249    0.145966   -0.078358    11.00000    0.02805    0.02207 =
         0.02429   -0.00035    0.00852    0.00208
S1    6    0.063690    0.227610   -0.195686    11.00000    0.06446    0.04354 =
         0.13941   -0.00965   -0.02539    0.01398
S2    6    0.411907    0.019614    0.210681    11.00000    0.04985    0.03363 =
         0.13431   -0.00512   -0.02549    0.01728
S3    6    0.082493    0.020206    0.306620    11.00000    0.05960    0.03988 =
         0.11675    0.00376   -0.02565   -0.01632
S4    6    0.394386    0.232106    0.712064    11.00000    0.07748    0.04679 =
         0.10301    0.00146   -0.01382   -0.02385
HKLF 4


REM  shelxt_a.res in P2(1)/n
REM wR2 = 0.2270, GooF = S = 1.158, Restrained GooF = 1.160 for all data
REM R1 = 0.0952 for 11580 Fo > 4sig(Fo) and 0.1174 for all 15085 data
REM 724 parameters refined using 7 restraints

END

WGHT      0.0382    440.8736

REM Highest difference peak  5.653,  deepest hole -5.541,  1-sigma level  0.329
Q1    1   0.2610  0.0521  0.1168  11.00000  0.05    5.65
Q2    1   0.2758  0.1978 -0.1440  11.00000  0.05    5.08
Q3    1  -0.0673  0.2185 -0.0546  11.00000  0.05    4.93
Q4    1  -0.0551  0.0302  0.4176  11.00000  0.05    4.67
Q5    1   0.3447  0.2385  0.7393  11.00000  0.05    4.60
Q6    1   0.3105  0.1843  0.6501  11.00000  0.05    4.49
Q7    1   0.1263  0.0141  0.2730  11.00000  0.05    4.20
Q8    1   0.1957  0.0560  0.4035  11.00000  0.05    4.14
Q9    1   0.2723  0.0625  0.2972  11.00000  0.05    3.78
Q10   1   0.2236  0.0623  0.1907  11.00000  0.05    3.43
;
_shelx_res_checksum                59548
_shelx_hkl_file
;
   1   0   0   -2.50    0.30
  -1   0   0   -3.20    0.20
   2   0   0 2728.73  102.49
   2   0   0 2781.42  102.49
  -2   0   0 2672.53  102.49
  -2   0   0 2780.02  102.49
   3   0   0   -1.10    0.60
  -3   0   0    0.10    0.90
  -3   0   0   -1.40    0.70
   3   0   0   -2.20    0.50
  -4   0   0 2891.61  106.49
  -4   0   0 2818.92   89.69
   4   0   0 2825.32  106.39
  -4   0   0 2831.32   88.19
   4   0   0 2846.62   88.09
  -5   0   0    1.90    1.30
  -5   0   0   -2.70    1.00
   5   0   0   -0.80    0.90
   5   0   0   -1.40    0.80
  -5   0   0   -3.10    1.30
   5   0   0   -1.10    1.00
   6   0   0 1435.36   46.10
  -6   0   0 1488.45   46.30
   6   0   0 1466.85   45.30
   6   0   0 1386.36   54.29
  -6   0   0 1459.55   45.30
  -6   0   0 1421.66   54.49
   7   0   0   -2.00    1.10
  -7   0   0   -4.20    1.40
  -7   0   0   -4.70    1.70
   7   0   0    2.90    3.70
  -7   0   0   -5.20    1.80
   7   0   0   -2.40    1.30
   7   0   0   -0.70    1.20
   8   0   0  537.25   17.70
  -8   0   0  541.95   21.60
   8   0   0  529.35   20.90
  -8   0   0  535.25   18.40
  -8   0   0  539.25   17.90
   9   0   0   -1.30    1.50
   9   0   0    0.00    1.50
  -9   0   0   -5.10    1.80
  10   0   0   54.69    3.60
 -10   0   0   50.69    3.80
  10   0   0   53.69    3.50
 -11   0   0   -2.50    2.40
  11   0   0   -1.20    2.00
 -12   0   0    7.70    2.90
 -13   0   0    2.50    3.20
 -14   0   0    2.90    3.50
  -1  -1   0    1.70    0.20
  -1   1   0    0.80    0.20
  -1   1   0    0.20    0.10
   1   1   0    2.20    0.30
   2  -1   0   30.50    1.50
  -2  -1   0   33.20    1.50
  -2  -1   0   28.50    1.40
   2  -1   0   27.20    1.40
  -2   1   0   27.00    1.50
  -2   1   0   32.10    1.50
   2   1   0   31.70    1.50
   2   1   0   29.30    1.40
   3  -1   0    0.40    0.60
  -3  -1   0    2.00    0.70
   3  -1   0   -0.40    0.60
  -3  -1   0    5.40    1.10
   3   1   0    0.60    0.50
   3   1   0    0.90    0.60
  -3   1   0    2.60    0.90
  -3   1   0    1.40    0.70
   4  -1   0  169.78    6.80
  -4  -1   0  156.48    5.80
  -4  -1   0  184.28    6.90
  -4  -1   0  161.58    6.10
   4  -1   0  168.58    5.80
  -4   1   0  183.58    6.90
  -4   1   0  162.28    6.10
   4   1   0  170.88    6.70
  -4   1   0  161.48    5.80
   4   1   0  158.68    5.70
   5  -1   0   10.40    1.60
  -5  -1   0   12.00    1.80
  -5  -1   0   20.50    1.90
   5  -1   0   15.10    1.40
   5  -1   0   12.90    1.50
  -5  -1   0   10.80    1.60
  -5   1   0   22.30    2.00
  -5   1   0   13.30    1.90
  -5   1   0   11.30    1.60
   5   1   0   13.80    1.50
   5   1   0   14.50    1.40
   5   1   0   11.70    1.50
   6  -1   0  196.08    7.00
  -6  -1   0  191.78    7.10
   6  -1   0  185.68    7.20
   6  -1   0  199.38    8.00
  -6  -1   0  186.08    7.40
  -6  -1   0  205.88    8.30
  -6   1   0  190.48    7.10
  -6   1   0  197.38    7.40
   6   1   0  201.88    8.00
   6   1   0  187.78    7.20
   6   1   0  199.08    7.00
   6   1   0  193.08   10.30
  -6   1   0  216.28    8.40
   7  -1   0   22.30    2.30
   7  -1   0   30.70    2.30
  -7  -1   0   27.10    2.50
  -7  -1   0   33.60    3.10
  -7  -1   0   29.00    2.90
   7  -1   0   32.50    2.30
   7   1   0   35.20    2.40
  -7   1   0   27.40    2.90
  -7   1   0   26.40    2.80
  -7   1   0   24.70    2.50
   7   1   0   36.20    3.90
   7   1   0   29.20    2.20
   7   1   0   30.40    2.40
   8  -1   0  182.68    7.80
   8  -1   0  175.78    6.90
  -8  -1   0  179.18    7.50
  -8  -1   0  185.68    7.10
  -8   1   0  196.68    8.60
   8   1   0  181.68    7.00
  -8   1   0  174.58    7.00
   8   1   0  183.48    7.80
  -8   1   0  182.18    7.60
   9  -1   0   26.30    2.40
  -9  -1   0   20.70    2.80
   9  -1   0   23.60    2.60
   9   1   0   21.90    2.50
   9   1   0   25.90    2.40
  -9   1   0   21.70    2.90
  10  -1   0   33.50    2.90
 -10  -1   0   25.30    3.20
  10  -1   0   28.90    2.90
 -10   1   0   23.60    3.20
  10   1   0   30.80    2.90
  10   1   0   32.80    3.00
 -11  -1   0    5.40    2.70
  11  -1   0    6.10    2.20
  11   1   0    6.40    2.30
 -11   1   0    0.40    2.50
 -12  -1   0   10.90    3.10
 -12   1   0   12.70    3.10
 -13  -1   0   -3.20    2.90
 -13   1   0   -3.60    3.00
 -14  -1   0   -2.30    3.40
 -14   1   0    1.80    3.30
   0   2   0    0.00    0.10
  -1  -2   0 2432.46   94.69
   1  -2   0 2478.95   94.69
   1   2   0 2643.74  109.09
   1   2   0 2586.54   94.69
   2  -2   0    0.30    0.50
  -2  -2   0    1.40    0.60
  -2  -2   0    1.20    0.40
   2  -2   0    1.50    0.50
  -2   2   0    0.00    0.40
   2   2   0    1.10    0.60
  -2   2   0    0.30    0.50
  -2   2   0    1.10    0.50
   2   2   0    1.60    0.40
   2   2   0    1.00    0.80
  -3  -2   0  445.06   17.10
   3  -2   0  429.16   17.00
  -3  -2   0  440.96   14.20
   3  -2   0  453.35   14.20
   3   2   0  440.96   14.20
  -3   2   0  432.86   14.20
  -3   2   0  443.36   17.10
   3   2   0  507.85   19.80
   3   2   0  429.96   17.00
   4  -2   0   16.00    1.40
   4  -2   0    9.70    1.30
  -4   2   0   10.60    1.60
   4   2   0   18.40    1.40
   4   2   0   12.10    2.20
   4   2   0   14.30    1.30
  -4   2   0   20.90    1.80
  -4   2   0   13.20    1.40
   5  -2   0  533.35   16.90
  -5  -2   0  511.75   16.90
  -5  -2   0  541.95   17.40
   5  -2   0  517.05   17.30
   5  -2   0  508.05   20.20
  -5  -2   0  524.05   20.30
   5   2   0  586.84   23.60
  -5   2   0  493.35   16.90
   5   2   0  515.45   16.90
  -5   2   0  543.65   20.40
   5   2   0  524.55   17.30
   5   2   0  507.05   20.10
  -5   2   0  540.35   17.40
  -6  -2   0   32.40    2.60
   6  -2   0   26.50    2.10
   6  -2   0   31.20    2.30
  -6  -2   0   28.10    2.30
  -6  -2   0   30.60    2.70
   6  -2   0   30.20    2.10
  -6   2   0   29.80    2.70
   6   2   0   27.00    2.20
   6   2   0   18.60    3.20
   6   2   0   29.10    2.00
  -6   2   0   28.60    2.60
  -6   2   0   26.30    2.20
   6   2   0   30.20    2.10
   7  -2   0  304.77   10.70
  -7  -2   0  293.07   12.60
  -7  -2   0  309.47   11.00
  -7  -2   0  302.47   10.50
   7  -2   0  302.77   10.40
   7  -2   0  297.17   12.10
   7   2   0  313.27   10.80
  -7   2   0  309.27   10.60
  -7   2   0  303.07   12.40
   7   2   0  311.37   10.40
   7   2   0  288.97   12.10
  -7   2   0  313.57   11.00
  -8  -2   0   52.69    3.70
  -8  -2   0   50.69    3.30
   8  -2   0   51.49    3.10
   8  -2   0   52.79    3.10
   8   2   0   51.99    3.10
  -8   2   0   47.30    3.70
   8   2   0   49.80    3.00
  -8   2   0   42.90    3.20
  -8   2   0   50.09    3.90
   9  -2   0  127.99    6.00
   9  -2   0  130.09    5.50
  -9  -2   0  123.89    5.60
  -9   2   0  131.49    5.70
   9   2   0  125.19    5.90
   9   2   0  137.49    5.60
 -10  -2   0    4.80    2.30
  10  -2   0    7.40    2.10
  10  -2   0    6.50    2.00
  10   2   0    3.60    1.90
  10   2   0    5.50    2.00
 -10   2   0    3.10    2.30
  11  -2   0   10.40    2.40
 -11  -2   0    8.80    2.80
 -11   2   0   10.00    2.80
  11   2   0   13.50    2.70
 -12  -2   0   12.10    3.10
 -12   2   0    9.70    3.10
 -13  -2   0    0.10    3.00
 -13   2   0   -3.80    2.90
 -14  -2   0    0.10    3.40
 -14   2   0    1.70    3.50
   0  -3   0   -0.10    0.20
   0   3   0    0.00    0.10
   0   3   0    0.00    0.20
   1  -3   0   12.20    0.70
  -1  -3   0   11.00    0.60
   1   3   0   12.40    0.70
   1   3   0   10.70    0.80
  -2  -3   0    3.80    0.80
   2  -3   0    4.20    0.70
   2  -3   0    3.60    0.70
   2   3   0    4.00    0.90
  -2   3   0    3.30    0.60
   2   3   0    4.40    0.80
  -2   3   0    4.30    0.60
  -2   3   0    4.50    0.70
   3  -3   0   63.59    2.40
  -3  -3   0   59.89    2.40
   3  -3   0   56.89    2.70
  -3  -3   0   64.39    2.80
   3   3   0   61.79    3.50
   3   3   0   58.29    2.40
  -3   3   0   62.29    2.80
   3   3   0   58.39    2.60
  -3   3   0   55.89    2.40
   4  -3   0   39.00    2.10
  -4  -3   0   37.50    2.30
  -4  -3   0   39.40    2.20
   4  -3   0   35.20    1.90
  -4  -3   0   37.50    2.00
  -4   3   0   38.50    2.00
  -4   3   0   44.40    2.40
  -4   3   0   38.00    2.20
   4   3   0   30.60    3.00
   4   3   0   46.00    2.00
   4   3   0   34.80    2.00
  -5  -3   0  125.29    5.40
  -5  -3   0  111.29    4.80
  -5  -3   0  116.09    4.60
   5  -3   0  118.59    4.70
   5  -3   0  126.39    4.60
   5  -3   0  121.89    5.20
   5   3   0  117.89    4.70
  -5   3   0  123.59    4.60
   5   3   0  122.09    5.10
   5   3   0  113.49    6.60
   5   3   0  120.99    4.50
  -5   3   0  121.29    4.90
  -5   3   0  129.39    5.40
   6  -3   0   42.10    2.40
   6  -3   0   37.40    2.50
  -6  -3   0   37.80    3.10
   6  -3   0   37.30    2.50
  -6  -3   0   42.60    2.80
  -6  -3   0   43.20    2.50
  -6   3   0   40.30    2.80
   6   3   0   40.60    2.40
   6   3   0   39.60    2.50
   6   3   0   44.40    2.30
  -6   3   0   35.80    2.50
  -6   3   0   38.70    3.00
   6   3   0   25.50    3.60
  -7  -3   0  121.69    6.30
  -7  -3   0  119.19    5.00
   7  -3   0  130.29    4.90
  -7  -3   0  116.39    5.30
   7  -3   0  119.39    5.30
  -7   3   0  117.99    5.30
   7   3   0  117.69    4.80
  -7   3   0  113.89    5.00
   7   3   0  122.59    5.30
  -7   3   0  123.39    5.80
   7   3   0  106.19    4.90
   8  -3   0   15.50    2.20
  -8  -3   0   14.10    2.60
   8  -3   0   19.40    2.10
  -8  -3   0   16.60    2.50
   8   3   0   15.40    2.00
  -8   3   0   13.30    2.30
  -8   3   0   17.70    2.80
   8   3   0   16.80    2.20
  -8   3   0   15.90    2.70
   9  -3   0  103.79    4.80
   9  -3   0  102.39    5.00
  -9  -3   0   98.59    4.90
  -9   3   0  103.69    5.00
   9   3   0  100.89    5.00
   9   3   0  103.79    4.80
  10  -3   0    1.90    1.80
 -10  -3   0   -2.50    2.10
  10   3   0    0.40    1.70
  10   3   0   -0.20    1.80
 -10   3   0   -1.90    2.10
 -11  -3   0   31.30    3.70
  11  -3   0   32.80    3.30
  11   3   0   34.10    3.30
 -11   3   0   28.40    3.60
 -12  -3   0    3.10    2.80
 -12   3   0    3.60    2.90
 -13  -3   0    1.80    3.10
 -13   3   0   -2.50    3.00
 -14  -3   0   -1.10    3.30
 -14   3   0    2.50    3.40
   0  -4   0    4.90    0.60
   0   4   0    3.50    0.70
   1  -4   0   -0.80    0.50
  -1  -4   0   -0.70    0.40
  -1   4   0    0.00    0.50
   1   4   0   -1.30    0.40
   1   4   0   -1.40    0.60
   1   4   0    1.50    0.80
  -2  -4   0  166.38    6.90
   2  -4   0  172.28    6.80
   2   4   0  159.58    6.70
   2   4   0  172.48    5.70
   2   4   0  164.58    7.80
  -2   4   0  165.88    6.80
  -2   4   0  170.68    5.70
  -3  -4   0    7.60    1.40
  -3  -4   0   16.50    1.30
   3  -4   0   12.80    1.20
   3  -4   0   16.40    1.30
   3   4   0   13.10    1.60
   3   4   0   11.40    1.10
  -3   4   0   13.60    1.20
   3   4   0   15.10    1.20
  -3   4   0   14.70    1.40
   4  -4   0   23.30    1.60
  -4  -4   0   22.20    2.00
   4  -4   0   24.20    1.70
  -4  -4   0   26.30    1.70
  -4  -4   0   26.50    1.90
   4   4   0   26.00    2.20
  -4   4   0   24.40    1.90
   4   4   0   28.60    1.80
  -4   4   0   24.70    1.70
   4   4   0   28.30    1.60
   4   4   0   24.80    1.60
  -4   4   0   25.30    1.90
   5  -4   0   43.50    2.30
  -5  -4   0   44.20    2.60
   5  -4   0   39.40    2.50
   5  -4   0   43.20    2.40
  -5  -4   0   41.70    2.40
  -5  -4   0   41.10    2.80
  -5   4   0   48.10    2.80
   5   4   0   39.80    2.40
  -5   4   0   42.40    2.40
   5   4   0   46.40    3.40
  -5   4   0   41.00    2.70
   5   4   0   50.59    2.50
   5   4   0   44.60    2.30
  -6  -4   0  128.59    6.50
  -6  -4   0  137.79    5.50
   6  -4   0  130.39    5.90
   6  -4   0  136.59    5.10
  -6  -4   0  140.19    5.20
   6  -4   0  128.29    5.30
   6   4   0  135.79    5.80
   6   4   0  148.49    5.40
   6   4   0  134.79    5.20
  -6   4   0  134.89    6.20
  -6   4   0  136.09    5.30
  -6   4   0  143.09    5.60
   7  -4   0   64.49    3.50
  -7  -4   0   63.09    3.80
  -7  -4   0   65.09    3.50
   7  -4   0   70.69    3.40
   7   4   0   65.59    3.50
  -7   4   0   68.59    3.90
  -7   4   0   70.99    4.10
  -7   4   0   63.89    3.50
   7   4   0   67.59    3.50
   7   4   0   71.79    3.40
   7   4   0   67.89    4.80
   8  -4   0   -0.40    1.40
  -8  -4   0   -1.20    1.70
   8  -4   0   -0.70    1.40
   8   4   0    0.80    1.40
  -8   4   0   -1.40    2.10
   8   4   0    0.50    1.30
  -8   4   0   -3.60    2.10
  -8   4   0   -2.90    1.70
   8   4   0    1.40    2.00
   9  -4   0   76.49    4.00
  -9  -4   0   77.09    4.20
   9  -4   0   74.39    4.10
  -9   4   0   72.79    5.50
  -9   4   0   71.69    4.20
   9   4   0   74.29    4.10
   9   4   0   74.99    4.00
 -10  -4   0   -3.00    2.10
  10  -4   0    1.70    1.90
 -10   4   0    0.20    2.20
  10   4   0    2.40    1.90
  10   4   0    1.30    1.80
 -11  -4   0   59.49    4.40
  11  -4   0   64.09    4.20
 -11   4   0   56.69    4.40
  11   4   0   60.49    4.10
 -12  -4   0    5.80    3.00
 -12   4   0    0.30    2.70
 -13  -4   0    4.30    3.10
 -13   4   0    4.20    3.20
 -14  -4   0   -0.50    3.30
 -14   4   0    1.90    3.50
   0  -5   0   -0.10    0.30
   0   5   0    0.40    0.30
   0   5   0    0.70    0.50
   1  -5   0    4.90    0.60
  -1  -5   0    5.00    0.50
   1   5   0    5.60    0.50
   1   5   0    5.80    0.80
  -1   5   0    5.20    0.60
   2  -5   0    1.20    0.60
   2   5   0    2.00    0.60
  -2   5   0    2.00    0.70
   2   5   0    2.10    0.50
  -2   5   0    2.20    0.60
   2   5   0    1.50    0.70
   3  -5   0   76.39    2.90
  -3  -5   0   75.49    3.00
   3  -5   0   78.49    3.50
  -3  -5   0   77.39    3.80
  -3   5   0   84.49    3.50
   3   5   0   80.79    3.00
   3   5   0   74.99    4.00
  -3   5   0   71.59    3.00
  -3   5   0   76.59    3.20
   3   5   0   77.39    3.30
  -4  -5   0   40.90    2.20
   4  -5   0   45.90    2.10
  -4  -5   0   44.60    2.80
  -4  -5   0   37.20    2.20
   4  -5   0   44.30    2.40
  -4   5   0   48.70    2.50
   4   5   0   43.20    2.20
   4   5   0   44.00    2.10
   4   5   0   40.40    2.20
  -4   5   0   43.60    2.40
   4   5   0   41.40    2.80
  -4   5   0   43.60    2.20
   5  -5   0  179.18    6.10
   5  -5   0  175.88    7.10
  -5  -5   0  165.48    6.10
   5  -5   0  160.68    6.20
  -5  -5   0  165.48    6.40
  -5  -5   0  185.38    7.60
  -5   5   0  183.08    7.20
  -5   5   0  164.18    6.10
   5   5   0  167.48    8.20
   5   5   0  165.28    6.90
   5   5   0  163.58    6.00
   5   5   0  167.08    6.20
  -5   5   0  163.98    6.40
  -6  -5   0   -0.90    1.50
  -6  -5   0   -1.10    1.20
   6  -5   0   -0.50    1.20
   6  -5   0   -0.60    1.00
   6  -5   0   -0.10    1.20
  -6   5   0   -1.90    1.60
   6   5   0    1.00    1.20
   6   5   0    0.00    1.00
   6   5   0    0.30    1.40
  -6   5   0   -0.40    1.30
  -6   5   0   -2.50    1.50
   6   5   0    1.50    1.00
  -7  -5   0  149.39    6.40
   7  -5   0  169.28    6.10
  -7  -5   0  153.58    6.10
   7  -5   0  159.88    6.80
   7   5   0  160.28    8.20
  -7   5   0  167.48    7.30
   7   5   0  152.58    6.00
  -7   5   0  149.39    6.50
  -7   5   0  158.28    6.20
   7   5   0  160.78    6.80
   7   5   0  155.48    6.30
  -8  -5   0   34.10    2.90
   8  -5   0   25.50    2.50
   8  -5   0   25.80    2.50
  -8   5   0   22.50    2.70
  -8   5   0   24.00    3.10
   8   5   0   34.90    2.60
   8   5   0   34.80    2.50
  -8   5   0   23.40    3.10
   8   5   0   34.80    3.40
  -9  -5   0   63.89    4.00
   9  -5   0   66.09    3.70
   9  -5   0   69.09    3.90
   9   5   0   67.59    3.80
   9   5   0   67.49    5.00
   9   5   0   64.79    3.70
  -9   5   0   65.99    4.00
  -9   5   0   74.69    5.10
  10  -5   0    1.40    1.90
 -10  -5   0   -4.40    2.00
 -10   5   0   -1.50    2.20
  10   5   0    0.60    1.80
  10   5   0    1.10    1.90
  11  -5   0   51.79    3.60
 -11  -5   0   45.70    4.00
 -11   5   0   43.10    3.90
  11   5   0   47.50    3.60
 -12  -5   0    3.10    2.80
 -12   5   0    1.00    2.80
 -13  -5   0    3.20    3.00
 -13   5   0    0.50    3.20
 -14  -5   0    0.40    3.40
 -14   5   0    3.90    3.40
   0  -6   0   -0.10    0.40
   0   6   0   -0.30    0.40
   0   6   0   -0.50    0.60
  -1  -6   0  864.31   32.70
   1  -6   0  841.02   32.70
   1   6   0  863.31   37.60
   1   6   0  846.02   32.60
   1   6   0  882.91   27.10
  -1   6   0  868.01   32.70
  -1   6   0  926.91   27.20
  -2  -6   0    3.60    0.70
   2   6   0    4.00    1.00
   2   6   0    3.40    0.70
  -2   6   0    4.80    0.70
   2   6   0    3.90    0.70
  -2   6   0    4.20    0.90
   3  -6   0 1810.52   53.69
   3  -6   0 1724.23   64.89
  -3  -6   0 1772.72   53.69
   3   6   0 1685.23   74.49
   3   6   0 1759.62   53.69
  -3   6   0 1696.03   53.69
   3   6   0 1676.63   64.69
  -3   6   0 1754.22   54.69
  -3   6   0 1673.03   64.79
   4  -6   0   41.40    2.00
   4  -6   0   31.70    2.20
  -4  -6   0   35.70    2.00
  -4  -6   0   36.50    2.20
   4   6   0   40.20    2.00
   4   6   0   32.60    2.00
  -4   6   0   38.40    2.10
   4   6   0   39.20    2.10
   4   6   0   35.70    2.60
  -4   6   0   39.80    2.30
  -5  -6   0 1305.07   42.50
   5  -6   0 1351.66   41.60
   5  -6   0 1287.87   50.09
  -5  -6   0 1372.86   41.70
   5   6   0 1345.57   42.40
   5   6   0 1305.17   41.60
   5   6   0 1271.07   57.59
  -5   6   0 1360.46   42.60
   5   6   0 1334.67   49.99
  -5   6   0 1312.47   41.70
  -5   6   0 1353.96   50.19
  -6  -6   0    5.80    1.40
   6  -6   0    5.30    1.40
  -6  -6   0    7.70    1.90
   6  -6   0    7.40    1.50
   6  -6   0    7.70    1.40
  -6   6   0    4.30    1.80
  -6   6   0    6.60    1.60
   6   6   0    8.70    1.60
   6   6   0    8.10    1.80
  -6   6   0    5.80    1.80
   6   6   0    8.50    1.40
   6   6   0    7.00    1.30
   7  -6   0  485.15   19.80
  -7  -6   0  513.25   16.80
   7  -6   0  508.65   16.70
  -7  -6   0  514.25   17.30
   7   6   0  509.65   16.80
  -7   6   0  506.85   16.90
   7   6   0  497.65   19.70
   7   6   0  534.05   17.20
   7   6   0  504.85   23.00
  -7   6   0  515.65   20.00
  -7   6   0  512.35   17.40
   8  -6   0   58.39    3.50
  -8  -6   0   66.89    3.70
   8  -6   0   62.49    3.40
   8   6   0   64.99    3.50
   8   6   0   64.79    3.50
  -8   6   0   59.39    3.70
   8   6   0   69.59    4.60
  -8   6   0   55.29    4.10
  -8   6   0   59.99    4.00
   9  -6   0   64.99    3.70
  -9  -6   0   64.79    3.90
   9  -6   0   55.19    3.70
   9   6   0   60.19    3.60
   9   6   0   61.39    3.50
   9   6   0   58.49    4.60
  -9   6   0   71.69    4.70
  -9   6   0   58.49    3.80
  10  -6   0   15.70    2.60
 -10  -6   0   14.70    2.70
 -10   6   0   12.80    2.80
  10   6   0   18.00    2.50
  10   6   0   17.40    2.60
  11  -6   0   32.50    3.20
 -11  -6   0   27.30    3.60
  11   6   0   23.40    3.00
  11   6   0   30.50    3.10
 -11   6   0   23.80    3.60
 -12  -6   0    5.70    3.00
 -12   6   0    7.30    3.10
 -13  -6   0    1.80    3.20
 -13   6   0    2.20    3.10
 -14  -6   0   -2.30    3.30
 -14   6   0    6.20    3.50
   0   7   0    0.40    0.50
   1  -7   0    6.20    0.70
  -1  -7   0    6.10    0.70
  -1   7   0    6.10    0.90
   1   7   0    5.20    0.70
   1   7   0    5.80    0.70
  -1   7   0    6.20    0.80
   1   7   0    6.50    1.00
  -2  -7   0   50.19    2.10
   2   7   0   49.70    2.30
  -2   7   0   53.19    2.40
   2   7   0   52.29    2.20
  -2   7   0   51.49    2.20
   2   7   0   51.09    2.80
   3  -7   0   25.10    1.50
  -3  -7   0   27.10    1.60
   3  -7   0   26.60    1.80
  -3   7   0   25.00    1.60
  -3   7   0   26.40    1.80
  -3   7   0   26.00    1.80
   3   7   0   24.10    1.50
   3   7   0   24.80    1.50
   3   7   0   27.00    2.00
   4  -7   0  275.07    9.00
  -4  -7   0  265.77    9.00
   4  -7   0  287.37   10.80
  -4  -7   0  255.17    9.30
  -4   7   0  279.97   10.70
   4   7   0  277.07   10.60
   4   7   0  282.57    9.10
  -4   7   0  271.07    9.40
  -4   7   0  267.37    9.10
   4   7   0  263.27    9.20
   4   7   0  267.17    9.20
   4   7   0  258.07   12.30
   5  -7   0   70.69    3.60
  -5  -7   0   69.79    3.40
  -5  -7   0   63.99    3.10
   5  -7   0   71.89    3.10
   5   7   0   65.69    4.00
   5   7   0   67.49    3.00
   5   7   0   68.69    3.20
  -5   7   0   67.69    3.10
  -5   7   0   67.19    3.60
   5   7   0   66.19    3.30
  -5   7   0   68.09    3.40
   6  -7   0   64.59    3.30
  -6  -7   0   69.59    3.30
  -6  -7   0   68.39    3.60
   6  -7   0   67.49    3.20
   6  -7   0   68.69    3.60
   6   7   0   66.29    3.40
  -6   7   0   64.79    3.70
  -6   7   0   73.99    3.90
  -6   7   0   60.09    3.30
   6   7   0   69.69    4.20
   6   7   0   69.89    3.40
   6   7   0   66.99    3.10
  -7  -7   0   44.70    3.00
  -7  -7   0   47.00    3.20
   7  -7   0   46.40    2.80
   7  -7   0   47.40    3.00
   7   7   0   49.90    3.70
   7   7   0   46.10    2.80
  -7   7   0   49.90    3.50
   7   7   0   46.80    2.80
   7   7   0   40.50    2.80
  -7   7   0   37.30    3.00
  -7   7   0   37.80    3.30
   8  -7   0  147.09    6.60
   8  -7   0  144.99    5.90
  -8  -7   0  154.78    6.20
  -8   7   0  149.19    6.60
   8   7   0  143.49    6.50
   8   7   0  154.78    6.00
  -8   7   0  138.49    6.10
   8   7   0  150.08    8.00
  -8   7   0  151.78    7.00
  -9  -7   0   -0.40    2.00
   9  -7   0    1.00    1.70
   9  -7   0   -2.70    1.60
  -9   7   0    3.40    2.70
  -9   7   0   -0.10    2.10
   9   7   0    0.50    1.60
   9   7   0    1.30    1.70
   9   7   0    1.00    2.10
  10  -7   0   39.00    3.30
 -10  -7   0   35.40    3.50
  10   7   0   37.20    3.20
 -10   7   0   32.90    3.50
  10   7   0   41.10    3.30
 -11  -7   0    7.80    2.70
 -11   7   0    9.10    2.90
  11   7   0   12.80    2.40
  11   7   0    7.20    2.40
 -12  -7   0   10.00    3.10
 -12   7   0   16.10    3.20
 -13  -7   0    1.60    3.10
 -13   7   0    1.40    3.20
 -14  -7   0   -3.40    3.20
 -14   7   0    1.80    3.40
   0   8   0 3202.08  137.09
   0   8   0 3175.68  119.19
  -1   8   0   -1.90    0.70
   1   8   0   -2.60    0.50
   1   8   0   -2.30    0.80
   1   8   0   -0.80    0.70
  -1   8   0   -0.80    0.80
  -2  -8   0 3350.26  100.29
  -2   8   0 3286.97  100.29
   2   8   0 3266.67  100.29
   2   8   0 3168.68  121.09
  -2   8   0 3166.78  121.09
  -2   8   0 3275.87  102.09
   2   8   0 3147.19  139.29
   3  -8   0   -0.60    0.70
   3  -8   0   -1.50    0.80
  -3  -8   0   -0.80    0.80
   3   8   0    0.20    0.80
   3   8   0   -0.80    0.60
  -3   8   0   -1.00    0.80
  -3   8   0    0.00    1.00
   3   8   0   -0.40    0.90
  -3   8   0   -1.10    1.10
   3   8   0   -1.00    0.90
   4  -8   0 3759.02  140.69
  -4  -8   0 3684.43  118.49
   4  -8   0 3856.71  116.39
  -4  -8   0 3854.61  116.39
   4   8   0 3685.53  140.49
   4   8   0 3748.32  116.39
   4   8   0 3823.82  118.39
  -4   8   0 3769.22  116.39
   4   8   0 3722.43  118.39
  -4   8   0 3834.52  118.59
   4   8   0 3599.74  161.58
  -4   8   0 3764.12  140.59
  -5  -8   0    2.90    1.10
   5  -8   0    1.50    1.00
  -5  -8   0    1.70    1.40
   5  -8   0    2.70    1.40
   5   8   0    2.90    1.20
  -5   8   0    4.30    1.50
   5   8   0    1.40    1.10
  -5   8   0    0.40    1.20
   5   8   0    1.90    1.30
   5   8   0    1.90    1.00
   6  -8   0  670.13   22.40
   6  -8   0  670.83   26.30
  -6  -8   0  668.53   22.50
   6  -8   0  692.53   22.00
  -6  -8   0  679.73   22.00
   6   8   0  663.03   30.20
   6   8   0  684.73   26.10
  -6   8   0  683.83   22.60
  -6   8   0  674.53   22.00
   6   8   0  711.83   22.50
  -6   8   0  705.93   26.40
   6   8   0  683.13   22.00
  -7  -8   0   -1.60    1.80
   7  -8   0   -1.30    1.40
  -7  -8   0   -1.70    1.40
   7  -8   0    0.20    1.30
  -7   8   0   -3.10    1.90
  -7   8   0   -3.40    1.60
   7   8   0   -0.60    1.20
   7   8   0    1.30    1.30
   7   8   0   -0.60    1.40
   7   8   0    0.30    1.70
  -7   8   0   -2.20    1.90
   8  -8   0  357.76   12.10
   8  -8   0  332.97   14.00
  -8  -8   0  361.86   12.20
  -8   8   0  361.56   14.30
  -8   8   0  356.16   12.80
   8   8   0  336.87   13.90
   8   8   0  350.56   12.10
   8   8   0  352.86   16.40
  -8   8   0  334.07   12.10
   9  -8   0   16.60    2.50
   9  -8   0   16.30    2.50
  -9  -8   0   22.50    2.90
   9   8   0   16.70    3.10
  -9   8   0   18.30    3.60
   9   8   0   15.80    2.50
   9   8   0   13.50    2.20
  -9   8   0   13.20    2.60
  10  -8   0   65.89    4.10
 -10  -8   0   63.49    4.20
 -10   8   0   57.89    4.30
  10   8   0   61.79    3.90
  10   8   0   64.09    3.90
 -11  -8   0    1.20    2.50
  11   8   0    0.00    2.10
 -11   8   0    0.80    2.60
  11   8   0    0.00    2.00
 -12  -8   0    2.90    2.80
 -12   8   0    5.00    3.00
 -13  -8   0    3.10    3.10
 -13   8   0    0.30    3.20
 -14  -8   0   -6.00    3.10
 -14   8   0    2.20    3.50
   1   9   0    4.80    0.80
  -1   9   0    4.60    0.80
   1   9   0    4.90    1.20
   1   9   0    4.20    0.70
   2  -9   0   53.69    2.20
  -2  -9   0   44.50    2.10
   2   9   0   46.90    2.30
   2   9   0   47.60    2.90
   2   9   0   47.30    2.20
  -2   9   0   52.69    2.30
  -2   9   0   56.99    2.50
  -2   9   0   51.99    2.40
   3  -9   0   22.80    1.90
   3  -9   0   23.60    1.50
  -3  -9   0   23.70    1.60
   3   9   0   21.10    1.50
  -3   9   0   23.30    1.90
   3   9   0   23.10    1.50
  -3   9   0   22.90    1.70
   3   9   0   24.30    2.00
  -3   9   0   21.60    1.60
   3   9   0   20.10    1.50
  -4  -9   0  181.78    6.40
  -4  -9   0  174.28    6.70
   4  -9   0  186.08    7.60
   4  -9   0  186.68    6.40
   4   9   0  174.08    6.60
   4   9   0  186.58    7.30
   4   9   0  177.68    8.60
  -4   9   0  195.18    7.60
  -4   9   0  175.98    6.40
  -4   9   0  186.18    6.70
   4   9   0  180.28    6.40
  -5  -9   0    6.30    1.30
   5  -9   0    7.40    1.50
  -5  -9   0    6.50    1.60
   5  -9   0    6.90    1.20
  -5   9   0    4.40    1.30
   5   9   0    6.40    1.40
   5   9   0    5.00    1.20
   5   9   0    7.00    1.60
   5   9   0    4.60    1.10
  -5   9   0    5.40    1.70
  -5   9   0    7.60    1.50
   5   9   0    6.90    1.40
  -6  -9   0  114.89    5.10
   6  -9   0  120.39    4.80
   6  -9   0  111.79    4.90
   6  -9   0  123.59    5.50
  -6  -9   0  118.09    4.80
  -6   9   0  120.59    5.20
   6   9   0  117.99    4.80
   6   9   0  124.09    5.30
  -6   9   0  130.69    5.70
  -6   9   0  111.19    4.80
   6   9   0  122.19    5.00
   6   9   0  118.89    6.40
   7  -9   0   21.00    2.20
  -7  -9   0   20.80    2.30
  -7  -9   0   19.70    2.60
   7  -9   0   16.80    2.30
   7   9   0   22.00    2.10
  -7   9   0   21.80    2.70
   7   9   0   19.00    2.30
  -7   9   0   17.50    2.80
   7   9   0   18.00    2.10
   7   9   0   23.80    2.80
  -7   9   0   16.80    2.40
  -8  -9   0   78.39    4.00
   8  -9   0   76.49    3.90
   8  -9   0   74.49    4.10
   8   9   0   71.19    3.70
   8   9   0   73.19    3.90
  -8   9   0   69.39    4.40
   8   9   0   75.69    5.00
  -8   9   0   63.39    4.00
  -8   9   0   76.69    4.60
  -9  -9   0   42.90    3.50
   9  -9   0   46.00    3.30
   9   9   0   45.20    3.20
   9   9   0   45.70    4.00
   9   9   0   47.50    3.30
  -9   9   0   42.20    3.50
  -9   9   0   49.40    4.30
 -10  -9   0   45.50    3.80
  10  -9   0   47.20    3.50
  10   9   0   45.80    3.40
 -10   9   0   41.70    3.80
  10   9   0   44.40    3.40
 -11  -9   0   -1.10    2.50
  11   9   0   -0.30    2.00
  11   9   0    0.70    2.00
 -11   9   0   -1.00    2.60
 -12  -9   0    1.90    2.80
 -12   9   0    2.50    3.00
 -13  -9   0   -3.40    3.00
 -13   9   0   -0.30    3.20
 -14  -9   0   -2.10    3.30
 -14   9   0    0.40    3.40
   0  10   0   -0.70    1.00
  -1  10   0  761.82   23.10
  -1  10   0  758.72   23.60
   1  10   0  724.93   31.90
   1  10   0  722.43   23.10
   1  10   0  707.63   27.60
  -1  10   0  717.13   27.70
   2 -10   0    3.00    0.80
  -2 -10   0    3.30    0.80
   2  10   0    4.00    0.80
   2  10   0    3.30    0.70
   2  10   0    3.20    1.00
   2  10   0    4.30    1.00
  -2  10   0    3.60    1.10
  -2  10   0    3.30    0.90
  -2  10   0    3.80    1.00
   3 -10   0  452.15   14.60
  -3 -10   0  467.15   14.60
   3  10   0  449.46   17.30
  -3  10   0  453.05   14.60
  -3  10   0  450.05   15.00
  -3  10   0  440.06   17.40
   3  10   0  464.75   14.90
   3  10   0  457.85   14.60
   3  10   0  441.36   20.10
   4 -10   0   15.30    1.90
  -4 -10   0   20.80    1.60
  -4 -10   0   15.00    1.80
   4 -10   0   16.20    1.60
  -4  10   0   19.10    2.00
   4  10   0   16.50    1.50
   4  10   0   18.80    1.60
  -4  10   0   18.90    1.90
   4  10   0   19.90    1.70
   4  10   0   17.00    2.10
  -4  10   0   15.30    1.70
  -5 -10   0  253.97    8.50
   5 -10   0  242.18   10.10
  -5 -10   0  241.98    8.80
   5 -10   0  257.27    8.50
  -5  10   0  239.88    8.50
   5  10   0  256.27    8.70
  -5  10   0  246.28    8.90
  -5  10   0  254.57   10.00
   5  10   0  230.38   11.50
   5  10   0  238.88    9.80
   5  10   0  249.78    8.70
   5  10   0  239.98    8.50
  -6 -10   0   24.40    2.40
   6 -10   0   21.30    2.10
   6 -10   0   17.80    2.20
   6 -10   0   22.80    2.00
  -6 -10   0   25.20    2.20
   6  10   0   25.40    2.30
  -6  10   0   22.30    2.30
   6  10   0   21.70    2.00
   6  10   0   23.50    2.00
   6  10   0   24.20    2.60
  -6  10   0   21.80    2.50
  -6  10   0   21.20    2.50
   7 -10   0   86.19    3.90
  -7 -10   0   87.49    4.40
  -7 -10   0   89.89    4.10
   7 -10   0   79.29    4.40
   7  10   0   86.19    4.10
  -7  10   0   90.49    4.50
  -7  10   0   85.29    4.70
   7  10   0   80.79    4.20
  -7  10   0   81.09    4.10
   7  10   0   83.49    5.20
   7  10   0   84.59    3.90
  -8 -10   0   11.90    2.10
   8 -10   0   13.20    2.00
   8 -10   0   12.20    2.30
  -8  10   0   10.50    2.60
   8  10   0   13.10    2.50
  -8  10   0   12.10    2.30
   8  10   0   13.10    2.10
  -8  10   0   15.20    2.80
   8  10   0   14.60    2.30
   9 -10   0   54.99    3.80
  -9 -10   0   56.19    3.70
  -9  10   0   52.19    3.80
  -9  10   0   60.09    4.50
   9  10   0   51.69    4.50
   9  10   0   61.89    3.50
   9  10   0   58.19    3.60
 -10 -10   0   14.40    2.70
  10 -10   0   17.10    2.80
 -10  10   0   14.60    2.90
  10  10   0   14.60    2.60
  10  10   0   14.10    2.40
 -11 -10   0   -2.30    2.50
  11  10   0   -0.60    2.00
 -11  10   0    2.20    2.60
  11  10   0   -0.50    2.00
 -12 -10   0    4.40    2.90
 -12  10   0    4.90    3.10
 -13 -10   0   -2.00    3.00
 -13  10   0   -0.60    3.10
 -14 -10   0   -0.10    3.50
 -14  10   0    4.10    3.40
   0  11   0    1.20    1.00
   0  11   0    0.80    0.80
   0  11   0    0.70    1.10
  -1 -11   0    2.30    0.80
   1  11   0    1.20    0.80
  -1  11   0    3.10    0.90
  -1  11   0    1.30    0.90
   1  11   0    2.70    1.10
   1  11   0    2.30    0.80
  -1  11   0    2.10    1.10
   1  11   0    3.00    1.00
   2 -11   0    2.10    0.80
  -2 -11   0    2.10    0.80
   2  11   0    3.00    0.90
  -2  11   0    1.80    0.90
  -2  11   0    2.40    1.00
   2  11   0    1.40    0.70
   2  11   0    1.50    0.90
  -2  11   0    3.00    1.20
   2  11   0    1.00    1.00
  -3 -11   0   32.50    1.90
   3 -11   0   29.30    1.70
  -3  11   0   31.90    2.00
  -3  11   0   32.20    2.00
   3  11   0   29.40    2.40
   3  11   0   30.10    1.80
   3  11   0   31.60    2.00
   3  11   0   31.90    1.90
  -3  11   0   31.10    2.10
   4 -11   0   23.80    1.80
   4 -11   0   25.80    2.20
  -4 -11   0   25.30    1.80
  -4 -11   0   20.50    1.90
   4  11   0   25.80    1.80
  -4  11   0   24.20    1.90
   4  11   0   26.00    1.80
   4  11   0   24.00    1.90
  -4  11   0   27.40    2.00
  -4  11   0   24.60    2.20
   4  11   0   22.40    2.30
   5 -11   0   92.49    3.80
   5 -11   0   83.09    3.90
  -5 -11   0   91.59    4.10
  -5 -11   0   92.09    3.90
   5 -11   0   92.29    4.50
   5  11   0   89.29    4.10
   5  11   0   96.69    4.00
   5  11   0   91.89    3.90
   5  11   0   88.09    5.00
   5  11   0   92.49    4.00
  -5  11   0   81.99    3.80
  -5  11   0   92.99    4.40
  -5  11   0   88.39    4.20
   6 -11   0   24.80    2.10
  -6 -11   0   24.90    2.30
   6 -11   0   23.00    2.30
  -6 -11   0   27.30    2.50
   6  11   0   23.40    2.00
  -6  11   0   25.90    2.30
   6  11   0   25.80    2.30
  -6  11   0   26.40    2.60
   6  11   0   24.40    2.70
   6  11   0   21.70    2.10
  -6  11   0   23.50    2.50
  -7 -11   0   38.80    2.80
   7 -11   0   33.30    2.50
   7 -11   0   33.10    2.80
   7  11   0   35.40    3.30
   7  11   0   36.60    2.60
   7  11   0   32.20    2.50
  -7  11   0   30.40    2.70
   7  11   0   34.20    2.70
  -7  11   0   33.80    3.10
  -7  11   0   33.70    3.20
   8 -11   0   -0.90    1.40
   8 -11   0    0.70    1.70
  -8 -11   0    3.30    1.80
  -8  11   0    2.40    2.00
  -8  11   0    0.10    2.30
   8  11   0    3.70    2.10
   8  11   0    1.80    1.50
  -8  11   0    1.60    2.40
   8  11   0    1.70    1.50
   9 -11   0   33.40    3.10
  -9 -11   0   24.60    3.00
  -9  11   0   34.00    3.80
  -9  11   0   27.80    3.30
   9  11   0   31.20    2.80
   9  11   0   27.60    2.80
   9  11   0   26.90    3.50
 -10 -11   0    5.10    2.40
  10 -11   0   10.70    2.40
  10  11   0    5.60    2.20
  10  11   0    7.10    2.10
 -10  11   0    8.80    2.70
 -11 -11   0    2.80    2.60
  11  11   0    2.80    2.10
 -11  11   0    2.60    2.60
  11  11   0    1.80    2.10
 -12 -11   0    5.80    3.00
 -12  11   0    4.10    3.00
 -13 -11   0   -0.70    3.20
 -13  11   0   -2.50    3.10
   0 -12   0  260.77    8.80
   0  12   0  262.07   12.10
   0  12   0  261.67   10.40
   0  12   0  268.77    9.10
  -1 -12   0    0.70    0.80
   1 -12   0    1.50    0.90
  -1  12   0   -0.60    1.10
  -1  12   0    1.00    0.90
   1  12   0    0.20    0.80
   1  12   0    3.50    1.10
   1  12   0    0.10    1.20
   2 -12   0   19.50    1.50
  -2 -12   0   25.60    1.60
  -2  12   0   22.20    1.70
  -2  12   0   22.10    1.80
  -2  12   0   23.50    1.70
   2  12   0   18.70    1.50
   2  12   0   20.20    1.70
   2  12   0   17.20    1.90
   2  12   0   20.40    1.60
   3 -12   0   13.80    1.40
  -3 -12   0   11.30    1.40
   3  12   0   11.20    1.30
  -3  12   0   12.10    1.60
   3  12   0   12.80    1.40
   3  12   0   16.10    1.60
  -3  12   0   11.30    1.80
   3  12   0   11.80    1.80
  -3  12   0   12.60    1.50
  -4 -12   0  122.99    5.00
  -4 -12   0  131.09    4.80
   4 -12   0  125.09    4.70
   4 -12   0  120.99    5.70
   4  12   0  124.19    5.30
   4  12   0  126.69    4.80
   4  12   0  123.29    4.90
  -4  12   0  120.59    4.80
  -4  12   0  125.79    5.50
   4  12   0  117.39    6.30
  -4  12   0  128.99    5.10
   5 -12   0   55.79    3.00
   5 -12   0   52.19    3.40
  -5 -12   0   63.79    3.30
  -5 -12   0   58.09    3.00
   5 -12   0   56.69    2.80
   5  12   0   63.59    3.10
  -5  12   0   56.59    3.30
   5  12   0   53.79    3.00
   5  12   0   59.69    2.90
  -5  12   0   61.99    3.30
   5  12   0   55.39    3.80
  -5  12   0   53.79    3.00
  -6 -12   0   79.09    3.70
  -6 -12   0   78.49    3.90
   6 -12   0   75.39    3.50
   6 -12   0   72.69    4.10
  -6  12   0   76.49    4.00
  -6  12   0   77.79    4.10
   6  12   0   74.89    3.60
   6  12   0   73.79    4.70
   6  12   0   80.39    3.70
   6  12   0   76.89    3.70
   6  12   0   76.29    3.80
  -6  12   0   69.59    3.60
  -7 -12   0   36.40    2.90
   7 -12   0   42.80    2.70
   7 -12   0   36.80    3.00
   7  12   0   38.60    2.90
   7  12   0   38.10    2.70
  -7  12   0   38.60    2.90
  -7  12   0   40.20    3.30
   7  12   0   39.40    3.50
   7  12   0   38.90    2.80
  -7  12   0   41.40    3.30
  -8 -12   0    4.80    1.90
   8 -12   0    3.40    2.00
   8 -12   0    4.90    1.70
  -8  12   0    3.60    1.90
  -8  12   0    1.70    2.30
   8  12   0    3.10    1.60
   8  12   0    3.20    1.60
   8  12   0    1.80    2.00
  -8  12   0    1.50    2.40
  -9 -12   0   38.00    3.40
   9 -12   0   32.40    3.10
  -9  12   0   34.70    3.90
   9  12   0   33.50    2.90
  -9  12   0   31.70    3.40
   9  12   0   32.80    3.00
   9  12   0   35.30    3.90
  10 -12   0   21.20    3.00
 -10 -12   0   25.00    3.40
  10  12   0   17.50    2.60
  10  12   0   18.70    2.80
 -10  12   0   20.10    3.20
 -11 -12   0   19.20    3.30
 -11  12   0   19.00    3.20
  11  12   0   24.00    3.10
  11  12   0   17.50    2.90
 -12 -12   0   12.50    3.20
 -12  12   0   12.10    3.30
 -13 -12   0   16.30    3.70
 -13  12   0   22.00    3.80
   0 -13   0    1.00    0.80
   0  13   0    1.80    1.20
   0  13   0    0.30    1.10
   0  13   0    1.70    0.90
   1 -13   0   21.60    1.50
   1  13   0   17.60    2.00
  -1  13   0   21.70    1.90
   2 -13   0    5.80    1.00
  -2 -13   0    4.60    1.00
   2  13   0    5.70    1.40
  -2  13   0    5.30    1.20
  -2  13   0    7.00    1.40
  -2  13   0    4.70    1.10
   2  13   0    6.20    1.10
   2  13   0    5.80    1.20
   2  13   0    5.40    0.90
  -3 -13   0   79.39    3.30
   3 -13   0   80.29    3.30
  -3  13   0   79.19    3.70
   3  13   0   81.99    3.50
   3  13   0   75.89    4.40
  -3  13   0   90.09    3.80
  -3  13   0   74.99    3.40
   3  13   0   81.09    3.60
   3  13   0   74.09    3.30
   4 -13   0   16.10    1.60
  -4 -13   0   14.90    1.60
  -4 -13   0   15.50    1.90
   4 -13   0   13.70    2.40
   4  13   0   17.40    1.70
   4  13   0   16.40    1.70
  -4  13   0   15.10    1.80
   4  13   0   16.80    1.80
   4  13   0   15.70    2.20
  -4  13   0   15.80    2.20
  -4  13   0   16.80    1.90
  -5 -13   0  186.18    7.30
  -5 -13   0  196.88    7.10
   5 -13   0  196.08    7.00
   5 -13   0  201.18    8.40
   5 -13   0  182.48    7.20
   5  13   0  192.08    8.00
  -5  13   0  201.58    7.50
  -5  13   0  204.18    8.20
   5  13   0  197.18    7.10
  -5  13   0  189.28    7.10
   5  13   0  191.08    9.50
   5  13   0  198.58    7.30
  -6 -13   0    2.30    1.90
  -6 -13   0    5.80    1.50
   6 -13   0    5.70    1.30
   6 -13   0    5.50    1.70
  -6  13   0    4.10    1.70
   6  13   0    6.00    1.90
   6  13   0    5.20    1.60
   6  13   0    4.40    1.30
  -6  13   0    3.40    1.90
   6  13   0    4.90    1.40
   6  13   0    5.50    1.60
  -6  13   0    4.70    1.80
   7 -13   0  103.49    4.50
  -7 -13   0  100.09    4.60
   7 -13   0  101.19    5.10
   7  13   0   96.79    5.90
   7  13   0   97.19    4.50
   7  13   0   97.09    4.70
  -7  13   0  100.29    5.20
   7  13   0  105.49    4.90
  -7  13   0   89.29    4.50
  -7  13   0  103.49    5.10
   8 -13   0    1.00    1.90
  -8 -13   0    0.20    1.70
   8  13   0    1.70    1.60
  -8  13   0   -0.80    2.40
  -8  13   0   -1.70    2.30
  -8  13   0   -0.50    1.90
   8  13   0   -0.10    2.00
   8  13   0   -0.80    1.50
   9 -13   0   53.19    3.80
  -9 -13   0   53.29    3.70
   9  13   0   51.59    3.50
  -9  13   0   53.89    3.90
   9  13   0   50.49    3.40
   9  13   0   51.19    4.60
  -9  13   0   61.29    4.40
 -10 -13   0    1.10    2.40
  10 -13   0    2.60    2.30
  10  13   0   -1.40    1.90
 -10  13   0   -1.30    2.40
  10  13   0   -0.30    1.90
 -11 -13   0   23.50    3.50
 -11  13   0   18.00    3.20
  11  13   0   21.90    3.20
 -12 -13   0   -1.10    2.80
 -12  13   0    1.60    2.90
 -13 -13   0   15.10    3.70
 -13  13   0   13.30    3.60
   0 -14   0   -0.60    0.80
   0  14   0    0.10    1.30
   0  14   0   -0.60    1.20
   0  14   0    0.60    0.90
   1 -14   0 1535.95   48.30
  -1 -14   0 1549.74   48.30
  -1  14   0 1509.65   58.09
   1  14   0 1542.05   58.09
   1  14   0 1568.34   49.30
  -1  14   0 1567.94   49.30
   1  14   0 1555.54   66.99
   2 -14   0    5.60    1.00
  -2 -14   0    4.90    1.00
   2  14   0    5.00    1.10
  -2  14   0    4.20    1.20
  -2  14   0    4.40    1.10
   2  14   0    3.10    0.90
  -2  14   0    4.40    1.40
   2  14   0    2.40    1.30
   2  14   0    3.70    1.20
   3 -14   0 1959.40   60.79
  -3 -14   0 1935.31   60.79
  -3  14   0 1966.10   60.89
  -3  14   0 2004.00   61.99
   3  14   0 1992.30   60.89
   3  14   0 1961.60   61.99
  -3  14   0 1899.61   73.19
   3  14   0 1916.01   84.29
   3  14   0 1908.91   73.09
  -4 -14   0   27.00    2.10
   4 -14   0   22.30    2.60
   4 -14   0   24.60    1.90
  -4 -14   0   31.70    2.30
  -4  14   0   26.00    2.50
   4  14   0   28.60    2.70
  -4  14   0   27.90    2.20
   4  14   0   31.50    2.20
   4  14   0   25.10    2.00
   4  14   0   31.00    2.10
  -4  14   0   28.30    2.20
   5 -14   0  864.41   29.80
  -5 -14   0  943.51   29.40
   5 -14   0  933.01   29.30
   5 -14   0  888.31   35.40
  -5 -14   0  915.31   30.00
   5  14   0  936.51   29.40
  -5  14   0  926.11   30.10
  -5  14   0  929.01   35.10
  -5  14   0  926.81   29.40
   5  14   0  930.61   35.00
   5  14   0  908.61   40.50
   5  14   0  951.90   30.00
  -6 -14   0   24.10    2.30
   6 -14   0   25.60    2.30
   6 -14   0   20.70    2.60
  -6 -14   0   23.90    2.60
   6  14   0   25.10    2.10
   6  14   0   28.00    2.40
  -6  14   0   28.90    2.70
   6  14   0   29.30    2.40
   6  14   0   29.40    2.40
   6  14   0   28.10    3.00
  -6  14   0   23.30    2.60
  -6  14   0   26.10    2.90
   7 -14   0  221.78    9.80
  -7 -14   0  225.38    8.50
   7 -14   0  235.88    8.30
   7  14   0  237.98   11.40
  -7  14   0  241.48    9.00
   7  14   0  220.98    9.40
  -7  14   0  223.98    8.50
   7  14   0  225.78    8.40
  -7  14   0  232.68    9.80
  -8 -14   0   12.00    2.30
   8 -14   0   12.40    2.40
  -8  14   0   14.80    2.50
  -8  14   0   18.30    3.00
   8  14   0   15.50    2.40
  -8  14   0   12.80    2.80
   8  14   0   12.40    2.20
   8  14   0   15.40    3.10
   9 -14   0   98.79    5.40
  -9 -14   0   98.19    5.10
  -9  14   0  103.79    5.20
  -9  14   0  102.99    5.80
   9  14   0  102.99    5.10
   9  14   0  101.99    5.00
   9  14   0  102.59    6.40
  10 -14   0   29.20    3.40
 -10 -14   0   28.80    3.40
  10  14   0   29.80    3.10
  10  14   0   23.60    2.90
 -10  14   0   27.00    3.40
 -11 -14   0   17.90    3.20
  11  14   0   23.10    3.20
 -11  14   0   20.90    3.40
 -12 -14   0   13.50    3.30
  12  14   0   14.00    2.90
 -12  14   0    8.70    3.20
 -13  14   0    7.90    3.40
   0  15   0   22.50    2.30
   1 -15   0    9.50    1.30
  -1 -15   0    6.50    1.10
  -1  15   0    7.30    1.40
  -2 -15   0   50.59    2.50
   2 -15   0   45.60    2.40
   2  15   0   53.09    2.70
   2  15   0   50.09    2.60
  -2  15   0   48.80    2.60
   2  15   0   50.59    3.30
  -2  15   0   49.00    2.80
  -3 -15   0   25.00    1.90
  -3 -15   0   25.20    2.10
   3 -15   0   26.10    1.90
   3  15   0   26.00    1.90
  -3  15   0   33.80    2.20
   3  15   0   25.90    1.90
  -3  15   0   25.80    2.30
   3  15   0   21.20    2.40
   3  15   0   25.30    2.10
  -3  15   0   25.30    2.10
   4 -15   0  219.58    9.10
   4 -15   0  209.78    7.40
  -4 -15   0  204.58    7.80
  -4 -15   0  206.98    7.50
  -4  15   0  204.38    8.00
   4  15   0  213.58    7.60
  -4  15   0  208.28    7.60
   4  15   0  215.78    8.50
  -4  15   0  222.08    8.70
   4  15   0  210.28   10.20
   4  15   0  207.98    7.80
  -5 -15   0   17.10    2.20
   5 -15   0   17.30    2.40
  -5 -15   0   20.00    2.00
   5 -15   0   18.80    1.90
  -5  15   0   15.40    2.10
   5  15   0   19.90    2.00
  -5  15   0   17.70    2.50
  -5  15   0   25.30    2.40
   5  15   0   17.30    2.50
   5  15   0   17.10    2.10
   5  15   0   19.10    1.80
   6 -15   0  136.79    5.50
   6 -15   0  143.29    6.60
  -6 -15   0  140.29    5.70
   6  15   0  139.89    6.10
  -6  15   0  141.19    6.10
   6  15   0  139.69    5.70
   6  15   0  137.49    7.40
   6  15   0  144.29    5.80
  -6  15   0  128.19    5.70
  -6  15   0  144.39    6.40
   6  15   0  134.09    5.80
   7 -15   0   15.00    2.20
   7 -15   0   14.30    2.50
  -7 -15   0   13.90    2.40
  -7  15   0   12.80    2.70
  -7  15   0   19.20    2.80
   7  15   0   12.60    2.20
  -7  15   0   17.60    2.60
   7  15   0   12.00    2.50
   7  15   0   10.50    2.00
  -8 -15   0   58.39    3.70
   8 -15   0   57.09    3.90
  -8  15   0   49.80    3.60
   8  15   0   58.39    3.50
  -8  15   0   52.89    4.10
  -8  15   0   55.89    4.20
   8  15   0   55.99    4.50
   8  15   0   60.99    3.50
   9 -15   0   19.00    3.00
  -9 -15   0   12.40    2.50
   9  15   0   16.10    2.50
  -9  15   0   12.80    3.10
   9  15   0   19.60    3.50
   9  15   0   17.80    2.70
  -9  15   0   17.10    2.90
  10 -15   0   46.80    3.90
 -10 -15   0   38.20    3.80
  10  15   0   39.30    3.50
  10  15   0   41.70    3.40
 -10  15   0   43.00    3.90
 -11 -15   0    6.10    2.90
  11  15   0    7.50    2.50
 -11  15   0    5.90    2.90
 -12  15   0   13.70    3.40
  12  15   0   15.50    2.90
 -13  15   0   -1.70    3.10
   0 -16   0 2450.75   77.29
   0  16   0 2527.55   78.79
   0  16   0 2517.75   93.19
   0  16   0 2443.96  107.29
   1 -16   0    2.70    1.00
  -1 -16   0    0.90    1.00
   1  16   0    0.30    1.00
  -1  16   0    1.70    1.40
   1  16   0    2.30    1.30
   1  16   0    0.40    1.50
  -1  16   0    2.20    1.00
  -2 -16   0 2949.70   91.49
   2 -16   0 2968.10   91.49
   2  16   0 2931.41   91.59
   2  16   0 3015.50   93.19
  -2  16   0 2834.92  110.29
   2  16   0 2900.31  110.29
  -2  16   0 3092.39   93.29
   2  16   0 2870.01  126.99
  -2  16   0 2946.21   91.59
  -3 -16   0    0.40    1.30
  -3 -16   0    1.90    1.10
   3 -16   0    3.70    1.10
   3  16   0    1.20    1.40
   3  16   0    0.90    1.00
  -3  16   0    3.50    1.60
   3  16   0    1.50    1.00
  -3  16   0    2.30    1.30
  -3  16   0   -1.30    1.20
   3  16   0    0.40    1.20
  -4 -16   0 2537.95   83.29
   4 -16   0 2692.93   81.79
  -4 -16   0 2693.73   81.89
   4  16   0 2559.14  113.49
  -4  16   0 2740.23   83.49
   4  16   0 2575.54   98.49
  -4  16   0 2597.64   98.59
  -4  16   0 2621.14   81.89
   4  16   0 2657.13   83.39
   4  16   0 2596.24   81.89
   5 -16   0    1.90    1.20
  -5 -16   0    1.50    1.60
  -5 -16   0    0.10    1.30
   5 -16   0    0.60    1.60
   5  16   0    2.10    1.70
   5  16   0    2.30    1.10
   5  16   0    1.10    1.50
  -5  16   0    1.70    1.60
  -5  16   0    1.10    1.50
   5  16   0    3.00    1.30
  -5  16   0   -0.60    1.70
   6 -16   0  842.82   26.80
   6 -16   0  818.82   32.20
  -6 -16   0  820.52   26.80
  -6  16   0  823.82   26.90
   6  16   0  845.92   27.40
   6  16   0  824.12   26.80
  -6  16   0  858.11   27.60
   6  16   0  818.22   31.70
  -6  16   0  846.22   31.90
   6  16   0  817.82   36.90
  -7 -16   0   -2.60    1.60
   7 -16   0    1.20    1.50
   7 -16   0   -1.00    1.70
  -7  16   0    1.90    2.30
   7  16   0   -1.10    1.40
   7  16   0   -1.10    1.90
  -7  16   0   -0.60    1.70
   7  16   0    0.30    1.50
  -7  16   0   -0.50    2.10
   8 -16   0  180.28    8.60
  -8 -16   0  193.98    7.60
  -8  16   0  197.68    8.70
  -8  16   0  198.48    8.20
  -8  16   0  189.98    7.70
   8  16   0  183.98    9.90
   8  16   0  189.28    8.20
   8  16   0  193.18    7.50
   9 -16   0   -0.40    2.30
  -9 -16   0   -3.20    2.00
   9  16   0   -0.10    1.80
   9  16   0   -0.10    1.80
  -9  16   0   -0.20    3.10
  -9  16   0   -0.20    2.30
  10 -16   0   26.80    3.50
 -10 -16   0   29.60    3.50
 -10  16   0   29.40    3.70
  10  16   0   31.00    3.10
  10  16   0   28.80    3.20
 -11 -16   0   -1.70    2.50
  11  16   0   -1.90    2.10
 -11  16   0    0.00    2.70
 -12  16   0    7.30    3.30
  12  16   0    7.00    2.60
 -13  16   0    6.10    3.50
   1  17   0   15.30    2.30
  -1  17   0   17.30    2.10
  -2 -17   0   31.60    2.10
   2 -17   0   33.20    2.10
   2  17   0   32.70    2.40
  -2  17   0   30.10    2.50
   2  17   0   30.40    2.10
  -2  17   0   28.30    2.20
   2  17   0   39.50    2.90
   3 -17   0    0.10    1.00
  -3 -17   0    1.50    1.40
  -3 -17   0    0.20    1.00
  -3  17   0    0.50    1.20
  -3  17   0   -0.50    1.50
   3  17   0    0.30    1.00
   3  17   0    0.10    1.40
   3  17   0   -0.70    1.20
   3  17   0    1.50    1.00
  -3  17   0   -0.60    1.30
   4 -17   0  129.59    5.10
  -4 -17   0  126.29    5.40
  -4 -17   0  134.79    5.20
  -4  17   0  120.39    5.20
  -4  17   0  145.09    5.90
   4  17   0  126.79    5.40
   4  17   0  130.79    6.90
   4  17   0  136.59    5.30
  -4  17   0  119.89    5.50
   4  17   0  134.69    5.70
   5 -17   0   37.60    3.10
  -5 -17   0   34.70    2.60
   5 -17   0   34.70    2.40
  -5 -17   0   34.30    2.80
   5  17   0   30.80    2.50
  -5  17   0   35.30    2.70
  -5  17   0   34.60    3.00
  -5  17   0   39.60    2.80
   5  17   0   34.30    2.40
   5  17   0   37.90    2.70
   5  17   0   34.80    3.30
   6 -17   0  134.69    6.70
  -6 -17   0  143.49    5.70
   6 -17   0  140.09    5.60
   6  17   0  138.29    5.70
   6  17   0  138.59    7.50
  -6  17   0  144.89    6.40
   6  17   0  138.79    6.10
   6  17   0  133.29    5.80
  -6  17   0  139.59    6.20
  -6  17   0  128.59    5.70
  -7 -17   0    1.70    1.80
   7 -17   0    1.80    1.90
   7  17   0    1.50    1.50
  -7  17   0    1.30    2.30
   7  17   0    4.50    1.70
  -7  17   0    2.30    1.90
   7  17   0   -0.10    2.00
  -7  17   0    3.00    2.20
   8 -17   0   77.49    4.80
  -8 -17   0   78.89    4.40
   8  17   0   75.59    4.20
  -8  17   0   76.69    4.90
   8  17   0   74.49    4.20
   8  17   0   77.39    5.40
  -8  17   0   72.99    4.40
   9 -17   0    2.10    2.50
  -9 -17   0   -0.40    2.10
  -9  17   0   -1.80    2.20
   9  17   0    0.70    1.90
   9  17   0   -1.20    1.90
 -10 -17   0   16.80    3.10
  10  17   0   14.70    2.70
  10  17   0   11.10    2.50
 -10  17   0   20.30    3.20
  11  17   0    0.40    2.20
 -11  17   0   -2.50    2.70
  12  17   0    7.00    2.70
 -12  17   0    5.00    3.30
 -13  17   0    0.90    3.30
   0 -18   0    2.00    1.00
   0  18   0    1.00    1.10
   0  18   0   -0.50    1.70
   0  18   0    0.80    1.40
   1 -18   0  702.93   22.90
  -1 -18   0  702.73   22.90
  -1  18   0  721.83   23.60
   1  18   0  711.33   31.70
   1  18   0  728.63   27.30
  -1  18   0  713.93   27.30
   1  18   0  729.43   23.60
   2 -18   0    3.70    1.10
  -2 -18   0    6.50    1.20
   2  18   0    4.70    1.50
   2  18   0    4.20    1.20
   2  18   0    5.00    1.30
  -2  18   0    7.20    1.70
  -2  18   0    3.10    1.20
   2  18   0    3.10    1.60
  -3 -18   0  175.08    6.80
   3 -18   0  182.88    6.50
  -3 -18   0  179.88    6.50
   3  18   0  179.28    6.70
  -3  18   0  180.88    7.50
   3  18   0  180.78    6.90
   3  18   0  175.58    8.90
   3  18   0  178.28    7.40
  -3  18   0  181.88    6.70
  -3  18   0  191.48    7.20
   4 -18   0   25.90    2.10
  -4 -18   0   22.70    2.20
  -4 -18   0   21.10    2.30
   4  18   0   21.50    2.00
   4  18   0   20.90    2.70
  -4  18   0   26.20    2.30
  -4  18   0   28.00    2.70
  -4  18   0   24.50    2.30
   4  18   0   23.10    2.20
   4  18   0   26.50    2.40
   5 -18   0  419.56   17.30
  -5 -18   0  426.36   14.30
   5 -18   0  424.16   14.30
   5  18   0  419.86   19.60
   5  18   0  424.86   14.70
   5  18   0  415.06   16.60
  -5  18   0  444.26   16.90
  -5  18   0  415.96   14.40
  -5  18   0  450.25   15.00
   5  18   0  430.86   14.50
   6 -18   0   35.40    2.60
   6 -18   0   25.80    3.10
  -6 -18   0   33.30    2.80
   6  18   0   33.80    2.70
  -6  18   0   33.20    2.90
   6  18   0   32.10    3.40
   6  18   0   30.30    2.50
   6  18   0   34.60    2.80
  -6  18   0   33.30    3.30
  -6  18   0   29.70    2.90
  -7 -18   0   40.00    3.20
   7 -18   0   39.30    3.60
   7  18   0   37.60    2.90
   7  18   0   39.30    3.00
   7  18   0   40.00    3.90
  -7  18   0   38.80    3.40
  -7  18   0   46.50    4.10
  -7  18   0   45.60    3.40
  -8 -18   0   35.30    3.30
   8 -18   0   39.90    3.70
   8  18   0   35.30    3.00
  -8  18   0   30.20    3.90
  -8  18   0   38.60    3.40
   8  18   0   40.30    4.10
   8  18   0   41.30    3.20
  -9 -18   0    6.80    2.40
   9 -18   0    9.70    2.80
   9  18   0   10.70    2.30
  -9  18   0    5.40    2.70
   9  18   0    9.00    2.10
 -10 -18   0   10.20    2.80
  10  18   0   12.90    2.70
 -10  18   0   15.60    3.20
  10  18   0   12.80    2.50
  11  18   0    0.20    2.20
 -11  18   0    2.30    2.90
 -12  18   0   -4.60    3.00
  12  18   0    0.70    2.50
 -13  18   0   -1.00    3.40
   0  19   0    1.80    1.80
   1 -19   0    4.20    1.10
  -1 -19   0    3.10    1.10
   1  19   0    4.00    1.40
  -1  19   0    2.30    1.40
   2 -19   0    9.70    1.50
   2  19   0    9.80    2.00
   2  19   0    7.40    1.70
  -2  19   0    9.20    1.80
  -3 -19   0   27.40    2.10
  -3 -19   0   25.70    2.50
   3 -19   0   25.80    2.00
   3  19   0   32.80    2.20
   3  19   0   30.40    2.30
   3  19   0   30.60    2.40
  -3  19   0   29.70    2.40
  -3  19   0   27.80    2.40
   3  19   0   31.50    2.90
  -3  19   0   27.40    2.70
  -4 -19   0   41.20    3.10
  -4 -19   0   44.10    2.70
   4 -19   0   46.50    2.70
   4  19   0   43.90    2.60
  -4  19   0   45.00    3.00
   4  19   0   42.70    3.50
  -4  19   0   46.30    2.90
   4  19   0   46.40    2.90
   4  19   0   41.10    2.70
  -4  19   0   44.80    3.20
   5 -19   0  100.19    5.40
   5 -19   0   94.29    4.30
  -5 -19   0   90.19    4.30
  -5  19   0   93.19    4.50
  -5  19   0  104.69    4.90
   5  19   0   96.09    4.60
   5  19   0   95.89    5.80
  -5  19   0   99.89    5.00
   5  19   0   99.39    4.50
   5  19   0   99.89    4.60
   6 -19   0   21.70    2.90
   6 -19   0   25.20    2.40
  -6 -19   0   21.80    2.50
   6  19   0   23.90    3.20
   6  19   0   23.00    2.60
   6  19   0   25.50    2.40
   6  19   0   25.30    2.60
  -6  19   0   28.40    3.20
  -6  19   0   22.50    2.70
  -6  19   0   21.30    2.70
   7 -19   0   69.09    4.70
  -7 -19   0   68.69    3.90
   7  19   0   72.29    4.00
  -7  19   0   70.49    4.40
   7  19   0   70.99    5.10
  -7  19   0   66.09    4.10
   7  19   0   74.09    4.00
  -7  19   0   73.69    4.60
  -8 -19   0   52.79    3.90
   8 -19   0   60.59    4.40
   8  19   0   63.09    3.70
  -8  19   0   51.09    4.40
   8  19   0   56.39    3.70
  -8  19   0   54.69    4.00
   8  19   0   57.69    4.80
  -9 -19   0    1.70    2.20
   9 -19   0    4.60    2.70
   9  19   0    4.60    2.10
   9  19   0    4.10    2.00
  -9  19   0    3.30    2.60
 -10  19   0   34.90    3.90
  10  19   0   32.20    3.20
  10  19   0   30.70    3.50
  11  19   0    4.30    2.40
 -11  19   0    4.00    3.00
 -12  19   0    3.50    3.20
  12  19   0   -0.40    2.40
 -13  19   0   -1.40    3.30
   0 -20   0  226.18    8.00
   0  20   0  239.78    8.60
   0  20   0  224.98    9.20
   0  20   0  227.58   11.10
   1 -20   0   -0.10    1.00
  -1 -20   0    0.70    1.10
   1  20   0    0.60    1.70
  -1  20   0    2.70    1.20
   1  20   0    1.50    1.10
  -1  20   0    4.10    1.70
   1  20   0    0.80    1.40
  -2 -20   0  560.24   19.60
  -2 -20   0  581.04   19.10
   2 -20   0  596.04   19.10
  -2  20   0  581.34   22.60
   2  20   0  597.34   19.30
   2  20   0  578.04   22.60
   2  20   0  585.04   26.40
  -2  20   0  612.24   19.80
   2  20   0  607.94   19.70
  -3 -20   0   12.80    2.10
  -3 -20   0   14.90    1.90
   3 -20   0   13.50    1.80
  -3  20   0   14.60    2.20
  -3  20   0   15.70    2.00
   3  20   0   16.90    1.90
   3  20   0   14.50    1.80
   3  20   0   11.90    2.30
   3  20   0   16.00    2.10
  -3  20   0   15.30    2.10
  -4 -20   0  192.58    7.00
   4 -20   0  187.08    6.90
  -4  20   0  204.28    7.60
  -4  20   0  179.78    7.80
   4  20   0  179.78    9.30
   4  20   0  180.78    7.70
   4  20   0  185.68    7.30
   4  20   0  192.08    7.10
  -4  20   0  181.78    7.10
  -5 -20   0   51.79    3.10
   5 -20   0   50.49    3.00
   5 -20   0   40.30    3.70
   5  20   0   55.39    3.30
  -5  20   0   43.20    3.10
  -5  20   0   45.80    3.60
   5  20   0   47.90    3.10
  -5  20   0   47.90    3.20
   5  20   0   48.60    4.00
   5  20   0   45.20    2.90
   6 -20   0   42.30    3.60
  -6 -20   0   48.80    3.20
   6  20   0   39.90    3.00
  -6  20   0   44.40    3.80
  -6  20   0   39.50    3.20
  -6  20   0   50.49    3.40
   6  20   0   47.40    3.00
   6  20   0   48.60    3.30
   6  20   0   48.20    4.00
   7 -20   0   80.69    5.10
  -7 -20   0   85.59    4.50
  -7  20   0   75.99    4.90
   7  20   0   76.99    4.30
   7  20   0   82.89    4.30
   7  20   0   84.09    5.70
  -7  20   0   78.49    4.40
  -7  20   0   84.79    4.80
   8 -20   0  195.08    9.30
  -8 -20   0  199.68    8.10
   8  20   0  201.18   10.70
  -8  20   0  210.28    8.30
   8  20   0  210.28    8.10
   8  20   0  204.18    8.80
   9 -20   0   42.40    4.20
  -9 -20   0   42.30    3.70
   9  20   0   40.90    3.40
   9  20   0   41.10    3.50
  -9  20   0   40.90    4.00
  10  20   0   71.79    4.50
 -10  20   0   75.39    4.90
  10  20   0   68.19    4.50
  11  20   0   24.60    3.40
 -11  20   0   16.10    3.50
  12  20   0    5.10    2.80
 -12  20   0    4.40    3.30
 -13  20   0    3.80    3.60
   0 -21   0   -0.10    1.10
   0  21   0    2.50    1.60
   0  21   0    4.30    2.10
   0  21   0    3.30    1.20
   1  21   0   33.50    3.30
  -2 -21   0    0.00    1.50
  -2 -21   0   -0.60    1.20
   2 -21   0    1.50    1.10
   2  21   0    0.20    1.50
   2  21   0    1.80    1.20
  -2  21   0    2.20    1.70
   2  21   0   -1.10    1.20
   2  21   0    3.60    1.90
  -3 -21   0   47.30    2.80
   3 -21   0   50.99    2.80
  -3 -21   0   55.29    3.20
   3  21   0   47.70    3.90
  -3  21   0   52.69    3.50
   3  21   0   48.60    3.20
  -3  21   0   52.69    3.20
  -4 -21   0    5.50    1.60
   4 -21   0    8.80    1.60
   4  21   0    7.50    2.20
  -4  21   0    6.60    1.60
  -4  21   0    6.10    1.80
   4  21   0    6.50    1.60
  -4  21   0    2.40    2.20
   4  21   0    7.60    1.50
   4  21   0    6.60    1.80
   5 -21   0  108.19    5.90
  -5 -21   0  105.39    4.80
   5 -21   0  107.89    4.80
   5  21   0  114.39    5.10
   5  21   0  105.59    6.30
   5  21   0  105.09    5.10
  -5  21   0  103.99    5.00
  -5  21   0  113.29    5.30
  -5  21   0  112.99    5.50
   5  21   0  118.89    5.00
  -6 -21   0   31.50    2.80
   6 -21   0   30.70    3.50
  -6  21   0   30.60    3.00
  -6  21   0   31.30    2.90
   6  21   0   31.00    3.50
   6  21   0   31.50    2.70
   6  21   0   27.70    2.90
  -6  21   0   34.80    3.50
   6  21   0   31.60    2.90
   7 -21   0  130.89    6.60
  -7 -21   0  118.69    5.50
   7  21   0  121.99    5.80
  -7  21   0  112.39    5.60
   7  21   0  124.59    7.30
  -7  21   0  126.59    6.10
   7  21   0  120.39    5.60
  -7  21   0  123.49    6.20
  -8 -21   0    2.60    2.10
   8 -21   0    5.00    2.60
   8  21   0    2.40    1.90
   8  21   0    2.90    1.90
   8  21   0    5.30    2.70
  -8  21   0    4.00    2.40
   9 -21   0  101.99    6.10
   9  21   0  109.99    5.40
   9  21   0   93.89    5.20
  -9  21   0   93.59    5.50
  10  21   0    0.70    2.20
 -10  21   0    2.80    2.80
  10  21   0    2.00    2.20
  11  21   0   20.80    3.40
 -11  21   0   21.10    3.70
  12  21   0    0.30    2.60
 -12  21   0   -1.80    3.10
 -13  21   0    4.70    3.50
  13  21   0   -0.10    2.70
   0 -22   0   -2.70    1.10
   0  22   0   -4.40    2.10
   0  22   0   -1.20    1.20
   0  22   0   -1.10    1.50
  -1 -22   0 1931.81   60.89
   1 -22   0 1901.01   60.79
  -1  22   0 1967.70   72.99
   1  22   0 1947.31   72.99
   1  22   0 1909.91   84.39
  -1  22   0 1975.30   62.19
   1  22   0 1955.40   62.19
  -2 -22   0    0.90    1.20
  -2 -22   0    1.20    1.50
   2 -22   0    3.00    1.30
   2  22   0    1.40    1.30
   2  22   0    0.20    2.00
  -2  22   0    2.40    1.80
   2  22   0    0.80    1.70
   2  22   0    1.10    1.20
  -2  22   0    2.40    1.40
   3 -22   0  995.60   32.00
  -3 -22   0  964.90   32.00
   3  22   0 1012.00   32.90
   3  22   0 1001.70   32.20
   3  22   0 1006.00   38.20
   3  22   0  981.30   44.30
  -3  22   0 1010.80   38.20
  -3  22   0 1031.80   32.30
  -3  22   0 1040.40   33.00
  -4 -22   0   12.80    2.10
   4 -22   0   13.00    2.00
   4  22   0   11.40    2.80
  -4  22   0   14.80    2.60
   4  22   0   10.50    1.80
   4  22   0   14.90    2.00
   4  22   0   13.10    2.10
  -4  22   0   12.70    2.10
  -4  22   0   12.80    2.10
  -5 -22   0  555.94   18.70
   5 -22   0  558.04   18.60
   5 -22   0  522.65   22.60
  -5  22   0  592.94   22.00
   5  22   0  544.15   18.70
  -5  22   0  587.94   19.50
   5  22   0  578.54   19.30
   5  22   0  569.34   25.60
   5  22   0  553.44   21.80
  -5  22   0  571.44   18.80
   6 -22   0   60.49    4.70
  -6 -22   0   68.69    3.90
   6  22   0   69.89    3.90
  -6  22   0   75.09    4.20
   6  22   0   70.69    5.10
   6  22   0   72.69    3.90
  -6  22   0   71.99    4.60
  -6  22   0   64.59    4.00
  -7 -22   0  297.47   10.80
   7 -22   0  285.97   12.80
   7  22   0  288.07   12.00
  -7  22   0  310.27   11.60
  -7  22   0  304.07   12.30
   7  22   0  292.57   14.50
  -7  22   0  287.27   10.90
   7  22   0  295.17   10.80
  -8 -22   0   31.70    3.30
   8 -22   0   29.00    4.10
   8  22   0   34.10    3.10
  -8  22   0   31.70    3.50
   8  22   0   35.70    4.30
   8  22   0   32.40    3.20
   9 -22   0  238.68   10.70
   9  22   0  228.68    9.20
   9  22   0  236.88   10.00
  -9  22   0  223.38    9.30
  10  22   0   19.20    3.20
  10  22   0   17.90    3.10
 -10  22   0   14.60    3.20
  11  22   0   32.80    3.70
 -11  22   0   29.80    4.10
  12  22   0   13.20    3.10
 -12  22   0   11.70    3.60
  -2  23   0   38.90    3.20
   2  23   0   39.10    3.80
   3 -23   0   13.80    2.00
  -3 -23   0    7.00    1.60
  -3  23   0   11.80    2.40
   3  23   0   17.70    2.10
   3  23   0   13.60    2.20
   3  23   0    9.90    2.00
   4 -23   0   49.80    3.20
  -4 -23   0   53.09    3.30
  -4  23   0   59.59    4.00
   4  23   0   60.69    3.40
   4  23   0   49.50    4.20
  -4  23   0   53.29    3.50
  -4  23   0   62.59    3.50
   4  23   0   56.79    3.60
   4  23   0   62.19    3.30
  -5 -23   0    5.20    1.80
   5 -23   0    7.30    2.30
   5  23   0   12.60    3.00
   5  23   0   10.60    2.00
   5  23   0    7.60    2.10
  -5  23   0    9.20    2.30
  -5  23   0    7.40    2.50
   5  23   0    6.20    1.80
  -6 -23   0  148.59    6.60
   6 -23   0  166.38    8.20
  -6  23   0  161.88    6.90
  -6  23   0  166.88    7.40
   6  23   0  166.28    7.20
   6  23   0  160.78    6.80
  -6  23   0  172.08    7.40
   6  23   0  166.88    8.90
   7 -23   0   12.60    2.90
  -7 -23   0   11.40    2.40
  -7  23   0    9.00    2.50
  -7  23   0    6.70    3.00
   7  23   0   13.10    2.30
   7  23   0   13.40    2.40
   7  23   0   10.20    2.90
   8 -23   0   65.69    5.20
  -8  23   0   57.39    4.30
   8  23   0   63.69    4.10
   8  23   0   60.39    5.20
   8  23   0   63.79    4.00
   9  23   0   38.50    3.40
   9  23   0   37.20    3.60
  -9  23   0   33.90    3.90
  10  23   0   29.00    3.60
 -10  23   0   19.00    3.50
  10  23   0   26.00    3.40
 -11  23   0    6.60    3.20
  11  23   0   11.00    2.80
  12  23   0    4.10    2.70
 -12  23   0    0.50    3.20
   0 -24   0 2249.18   72.39
   0  24   0 2351.46   74.09
   0  24   0 2348.07   86.99
   1 -24   0    1.70    1.30
  -1 -24   0   -2.20    1.20
   1  24   0   -1.50    1.30
   1  24   0   -1.10    1.80
  -1  24   0    0.20    1.40
   1  24   0   -0.10    2.20
  -1  24   0   -0.80    1.80
   2 -24   0 1328.97   42.40
  -2 -24   0 1281.77   42.30
  -2  24   0 1366.76   50.59
   2  24   0 1339.07   50.59
   2  24   0 1307.97   42.50
   2  24   0 1316.17   58.69
   2  24   0 1359.06   43.40
  -2  24   0 1404.36   43.60
   3 -24   0   -1.10    1.20
  -3 -24   0   -0.80    1.40
   3  24   0   -0.20    1.30
   3  24   0   -0.70    2.10
   3  24   0   -1.40    1.30
   3  24   0    0.60    1.60
  -3  24   0    0.30    1.50
  -3  24   0    3.80    2.10
  -4 -24   0  435.06   15.20
   4 -24   0  441.76   15.10
  -4  24   0  474.55   16.00
   4  24   0  470.15   15.80
   4  24   0  446.56   20.80
   4  24   0  446.66   15.30
   4  24   0  431.16   17.60
  -4  24   0  462.55   17.70
  -4  24   0  443.56   15.30
  -5 -24   0    2.00    1.70
   5 -24   0   -0.10    2.00
   5  24   0   -1.60    1.50
  -5  24   0    0.00    1.90
   5  24   0   -0.70    1.80
  -5  24   0    1.00    2.30
  -5  24   0    1.00    1.80
   5  24   0    1.40    1.50
   5  24   0    2.30    2.30
   6 -24   0  390.36   16.90
  -6 -24   0  397.46   14.10
   6  24   0  414.76   19.10
  -6  24   0  417.36   14.90
   6  24   0  393.06   16.00
  -6  24   0  421.56   16.20
   6  24   0  398.06   14.10
  -6  24   0  397.06   14.20
  -7 -24   0    0.70    2.10
   7 -24   0    0.90    2.50
   7  24   0   -1.00    2.40
   7  24   0    0.20    1.90
  -7  24   0   -0.30    2.20
   7  24   0    0.50    1.70
   8 -24   0  108.69    6.50
   8  24   0  108.29    5.50
  -8  24   0  106.39    5.70
   8  24   0  110.19    7.00
   8  24   0  103.29    5.40
   9  24   0    0.30    2.10
   9  24   0   -0.50    2.00
  -9  24   0   -0.40    2.70
  10  24   0   22.10    3.40
 -10  24   0   26.00    4.00
  11  24   0    1.50    2.50
 -11  24   0    0.50    3.10
 -12  24   0   -0.30    3.20
  12  24   0    1.40    2.70
  -1 -25   0    5.50    1.50
   1 -25   0    4.10    1.40
   1  25   0    6.00    2.00
   1  25   0    3.50    1.30
   1  25   0    3.50    1.60
   1  25   0    4.60    2.40
  -1  25   0    5.40    1.50
  -1  25   0    2.50    2.10
   2 -25   0   46.00    2.90
  -2 -25   0   36.50    2.80
   2  25   0   36.00    3.00
  -2  25   0   48.40    3.60
  -2  25   0   58.69    3.10
   2  25   0   49.40    2.90
   2  25   0   46.50    3.50
   3 -25   0    1.70    1.40
  -3 -25   0    0.60    1.50
   3  25   0    4.20    1.50
   3  25   0    2.80    2.30
  -3  25   0    2.00    2.10
   3  25   0    0.70    1.70
   3  25   0    1.60    1.50
  -3  25   0    3.10    1.60
  -4 -25   0   30.20    2.80
   4  25   0   45.70    4.00
   4  25   0   36.90    3.00
  -4  25   0   30.00    3.10
  -4  25   0   42.40    2.90
   4  25   0   35.40    2.70
  -4  25   0   34.70    3.50
   4  25   0   36.80    3.20
  -5 -25   0   10.50    2.10
   5 -25   0   10.80    2.70
   5  25   0   11.90    2.10
  -5  25   0   11.10    2.80
   5  25   0   14.50    2.50
  -5  25   0   13.00    2.50
   5  25   0   13.80    2.30
   5  25   0   14.50    3.10
  -5  25   0   12.30    2.50
  -6 -25   0   43.60    3.40
   6 -25   0   42.90    4.20
   6  25   0   41.60    3.40
   6  25   0   46.30    4.30
  -6  25   0   42.60    4.10
  -6  25   0   42.20    3.50
   6  25   0   45.00    3.20
  -6  25   0   40.90    3.40
   7 -25   0   -0.50    2.60
  -7  25   0   -1.50    2.20
   7  25   0    0.60    1.90
   7  25   0   -1.90    2.50
   7  25   0   -0.40    1.80
   8 -25   0   26.30    4.20
   8  25   0   19.10    3.00
  -8  25   0   21.60    3.40
   8  25   0   19.30    4.00
   8  25   0   22.80    2.90
   9  25   0   -0.50    2.10
   9  25   0    2.20    2.20
  -9  25   0    0.00    2.70
 -10  25   0    9.60    3.30
  10  25   0   12.80    2.80
  11  25   0    2.50    2.60
 -11  25   0   -1.20    3.10
 -12  25   0    3.60    3.50
  12  25   0    3.30    2.80
   0 -26   0    6.30    1.60
   0  26   0    6.70    2.20
   0  26   0    8.40    1.60
  -1 -26   0   61.49    3.40
   1 -26   0   62.69    3.40
  -1  26   0   63.19    3.50
  -1  26   0   67.99    4.10
   1  26   0   56.89    4.80
   1  26   0   60.39    3.90
   1  26   0   64.29    3.50
   1  26   0   58.49    3.50
  -2 -26   0    9.00    1.80
   2 -26   0   12.20    1.90
   2  26   0   11.30    2.00
   2  26   0   11.50    2.30
   2  26   0   13.50    2.10
  -2  26   0   13.10    2.10
   2  26   0   12.80    2.90
  -2  26   0   12.30    2.40
  -3 -26   0   32.70    2.80
   3  26   0   36.50    2.70
  -3  26   0   39.40    2.80
   3  26   0   35.80    3.90
  -3  26   0   42.70    3.70
   3  26   0   34.40    2.90
   3  26   0   34.40    3.10
  -4 -26   0    7.40    1.90
  -4  26   0   13.40    2.80
   4  26   0   13.00    2.20
  -4  26   0   12.70    2.20
   4  26   0   11.40    2.10
   4  26   0   14.40    3.00
   4  26   0   15.30    2.50
   5 -26   0   18.80    3.20
  -5 -26   0   15.70    2.40
   5  26   0   17.60    2.40
  -5  26   0   15.60    2.60
   5  26   0   18.70    3.40
   5  26   0   16.40    2.60
  -5  26   0   21.40    3.40
  -5  26   0   20.10    2.80
   6 -26   0   10.50    3.00
   6  26   0   11.00    2.30
   6  26   0   14.00    3.10
  -6  26   0   15.50    2.80
  -6  26   0   16.70    3.40
   6  26   0   15.70    2.50
   7 -26   0    8.10    3.20
   7  26   0    6.40    3.00
   7  26   0    5.90    2.00
  -7  26   0   -0.40    2.40
   7  26   0    2.10    2.00
   8 -26   0    5.50    3.20
   8  26   0    6.60    2.40
   8  26   0    6.40    2.20
   8  26   0    6.80    3.20
  -8  26   0    6.30    2.80
  -9  26   0   -0.10    2.80
   9  26   0    4.30    2.30
   9  26   0    0.10    2.10
 -10  26   0   16.90    3.60
  10  26   0   13.60    2.90
  11  26   0   -1.70    2.50
 -11  26   0    5.00    3.30
 -12  26   0   -1.10    3.30
  12  26   0    2.10    2.90
   0 -27   0   29.40    2.60
   0  27   0   31.80    3.10
   0  27   0   23.90    2.40
  -1 -27   0    4.90    1.60
   1 -27   0    4.50    1.60
  -1  27   0    5.80    1.60
   1  27   0    6.90    2.80
  -1  27   0    2.90    2.10
   1  27   0    4.20    1.40
   1  27   0    1.90    1.60
   1  27   0    5.00    2.10
   2 -27   0   19.00    2.30
  -2 -27   0   24.70    2.50
  -2  27   0   23.60    2.30
   2  27   0   14.50    3.40
  -2  27   0   23.30    3.00
   2  27   0   20.30    2.80
   2  27   0   20.40    2.50
   2  27   0   20.70    2.20
  -3 -27   0   12.30    2.00
  -3  27   0    9.90    2.70
   3  27   0   11.60    2.10
   3  27   0   13.80    3.00
   3  27   0   14.60    2.40
  -3  27   0   11.40    2.20
   3  27   0   13.00    2.20
  -4 -27   0   17.50    2.50
  -4  27   0   15.40    3.00
   4  27   0   18.60    2.30
   4  27   0   16.80    2.60
  -4  27   0   18.50    2.40
   4  27   0   13.00    2.50
   4  27   0   15.90    3.40
   5 -27   0    1.20    2.50
   5  27   0    3.00    1.90
   5  27   0    3.70    1.70
  -5  27   0    0.60    2.20
  -5  27   0   -0.60    1.90
   5  27   0    2.20    2.60
  -5  27   0   -0.10    2.60
   6 -27   0   30.60    4.10
  -6  27   0   26.60    3.30
   6  27   0   29.10    4.10
  -6  27   0   30.20    3.90
   6  27   0   30.80    2.90
   6  27   0   29.90    3.20
   7 -27   0   20.00    4.10
   7  27   0   20.70    2.80
  -7  27   0    8.80    2.80
   7  27   0   14.30    3.40
   7  27   0   14.80    2.60
   8  27   0    9.30    2.50
  -8  27   0   13.00    3.00
   8  27   0   11.00    3.40
   8  27   0    9.70    2.30
  -9  27   0   11.10    3.20
   9  27   0   14.20    2.80
  10  27   0   12.40    2.80
 -10  27   0    8.60    3.20
 -11  27   0    2.30    3.30
  11  27   0   -1.20    2.60
  12  27   0    5.30    3.00
 -12  27   0    4.90    3.50
   0 -28   0  436.46   15.20
   0  28   0  470.05   17.60
   0  28   0  434.96   15.80
  -1 -28   0    7.80    1.80
  -1  28   0    9.50    2.60
   1  28   0    2.70    2.80
  -1  28   0    7.40    1.70
   1  28   0    6.30    2.30
   1  28   0    6.70    1.70
   1  28   0    9.60    2.00
  -2 -28   0  171.38    7.00
  -2  28   0  190.18    7.70
   2  28   0  182.08    7.60
   2  28   0  181.88    7.70
   2  28   0  172.58    9.70
  -2  28   0  179.18    7.70
   2  28   0  181.28    7.30
  -3 -28   0   18.60    2.50
  -3  28   0   18.90    2.40
   3  28   0   15.80    3.60
   3  28   0   13.90    2.20
   3  28   0   17.40    2.60
  -3  28   0   19.20    3.10
   3  28   0   16.80    2.80
   4  28   0  172.88    9.50
  -4  28   0  167.18    7.60
   4  28   0  177.08    7.20
   4  28   0  171.88    7.50
  -4  28   0  186.68    7.60
   4  28   0  164.08    7.50
   5 -28   0    4.80    2.80
  -5  28   0    5.30    2.90
   5  28   0   14.20    2.50
  -5  28   0    5.90    2.40
   5  28   0    7.00    2.10
   5  28   0    7.50    2.90
   6 -28   0  253.57   11.90
   6  28   0  260.17   13.30
   6  28   0  266.97   10.80
   6  28   0  257.27   10.00
  -6  28   0  260.97   10.00
   7 -28   0   42.80    4.80
   7  28   0   43.10    3.70
   7  28   0   41.30    4.70
   7  28   0   44.80    3.40
  -7  28   0   39.50    3.80
   8  28   0   90.69    5.00
   8  28   0   79.79    6.40
  -8  28   0   84.69    5.20
   9  28   0   52.29    4.10
  -9  28   0   49.99    4.50
 -10  28   0   16.10    3.60
  10  28   0   12.20    3.00
 -11  28   0   33.90    4.40
  11  28   0   27.70    3.90
   0  29   0   12.10    2.10
   0  29   0    2.80    2.20
   1  29   0   60.09    3.80
  -1  29   0   60.39    3.50
  -2  29   0    3.40    1.60
   2  29   0    0.40    2.30
  -2  29   0    3.40    2.40
   2  29   0    2.90    1.60
   2  29   0    0.40    1.70
   3  29   0   64.99    4.30
  -3  29   0   71.19    4.60
   3  29   0   65.79    3.80
   3  29   0   69.59    4.00
   3  29   0   53.49    5.10
  -3  29   0   75.39    3.90
  -4  29   0    2.00    2.80
   4  29   0   15.50    3.70
   4  29   0   -0.10    1.60
   4  29   0    2.10    1.90
  -5  29   0   58.49    4.80
   5  29   0   56.49    3.60
   5  29   0   42.20    4.80
   5  29   0   50.99    3.80
   6 -29   0    2.90    3.20
   6  29   0    0.30    2.10
   6  29   0    6.10    2.00
   6  29   0    6.30    3.00
  -6  29   0    1.70    2.40
   7 -29   0   77.09    5.90
  -7  29   0   71.59    4.90
   7  29   0   75.59    6.20
   7  29   0   85.59    4.60
   7  29   0   80.79    4.80
  -8  29   0    1.30    2.80
   8  29   0    3.20    2.30
  -9  29   0   49.90    4.50
   9  29   0   42.90    4.00
  10  29   0    2.80    2.60
 -10  29   0    9.00    3.30
  11  29   0   21.80    3.60
 -11  29   0   22.90    4.00
   0  30   0   -2.50    1.50
   0  30   0   -1.00    2.10
   1  30   0  850.71   31.70
   1  30   0  752.32   37.30
   1  30   0  810.82   27.10
  -1  30   0  815.42   27.90
  -1  30   0  878.81   31.70
   1  30   0  860.31   28.00
   2  30   0    2.20    2.20
   2  30   0    5.10    1.70
  -2  30   0    4.40    1.60
   2  30   0    2.30    2.90
   2  30   0    3.60    2.00
  -2  30   0    4.10    2.50
  -3  30   0  365.76   13.50
   3  30   0  332.87   17.30
   3  30   0  351.46   12.80
  -3  30   0  379.66   14.30
   3  30   0  361.56   13.30
   3  30   0  354.56   14.30
   4  30   0    3.70    2.00
   4  30   0    5.20    1.80
  -4  30   0    7.50    3.00
   4  30   0    5.50    3.00
  -5  30   0  548.75   18.80
   5  30   0  509.35   24.30
   5  30   0  510.25   18.00
   5  30   0  521.25   20.50
   6 -30   0   18.40    3.70
   6  30   0   14.40    2.70
   6  30   0   16.60    3.60
   6  30   0   19.30    2.80
  -6  30   0   20.40    3.50
   7 -30   0  260.67   12.50
  -7  30   0  275.97   10.60
   7  30   0  269.17   10.50
   7  30   0  267.37   13.80
   8  30   0   22.50    3.30
  -8  30   0   25.00    3.80
   9  30   0   38.50    3.80
  -9  30   0   41.30    4.30
  10  30   0   37.30    4.20
 -10  30   0   45.90    4.60
  11  30   0   14.10    3.30
 -11  30   0   14.60    3.80
   0  31   0   58.39    4.40
   0  31   0   44.10    3.10
  -1  31   0   13.30    2.90
   1  31   0   23.30    2.40
   1  31   0   12.30    2.80
   2  31   0   63.79    3.80
   2  31   0   70.09    4.60
  -2  31   0   70.89    3.90
  -2  31   0   68.39    4.60
   3  31   0    6.90    2.20
   3  31   0    5.90    2.60
   3  31   0    4.30    1.70
  -3  31   0    6.80    2.90
   4  31   0   45.70    3.60
   4  31   0   33.70    4.60
   4  31   0   47.40    3.20
  -4  31   0   47.20    4.30
   5  31   0   18.00    2.60
   5  31   0    9.80    2.40
   6 -31   0   43.60    5.20
  -6  31   0   43.00    4.00
   6  31   0   46.40    5.00
   6  31   0   47.70    3.90
   7  31   0   15.50    2.80
  -7  31   0   16.00    3.10
  -8  31   0   26.50    3.90
   8  31   0   29.80    3.60
  -9  31   0    3.40    2.90
   9  31   0    0.50    2.40
  10  31   0   16.10    3.30
 -10  31   0   22.70    3.90
 -11  31   0    0.30    3.40
  11  31   0   -2.30    2.60
   0  32   0  697.73   24.80
   0  32   0  746.13   27.80
   1  32   0    2.10    1.70
   1  32   0    4.50    2.60
  -1  32   0   -0.90    2.40
   1  32   0    7.40    3.40
   1  32   0    4.00    2.00
   2  32   0  700.73   23.20
   2  32   0  732.63   26.70
  -2  32   0  735.23   24.10
   2  32   0  599.14   31.40
   2  32   0  699.63   23.90
   3  32   0   -0.20    1.90
  -3  32   0   -0.50    2.60
   3  32   0    1.90    1.70
   3  32   0    2.10    3.10
   4  32   0  405.46   20.80
  -4  32   0  442.16   16.20
   4  32   0  451.65   17.20
   4  32   0  440.66   15.40
   5  32   0   -1.10    3.10
   5  32   0    0.90    2.10
   6 -32   0  115.79    7.40
   6  32   0  120.19    6.00
   6  32   0  110.29    7.60
   7  32   0    4.20    3.30
  -7  32   0    1.80    2.70
   7  32   0    1.70    2.20
  -8  32   0   35.60    4.00
   8  32   0   33.90    3.80
  -9  32   0    6.50    3.20
   9  32   0    5.40    2.70
 -10  32   0    0.40    3.20
  10  32   0    2.80    2.80
 -11  32   0   -0.40    3.40
  11  32   0    1.00    2.80
   0  33   0    8.40    2.70
  -1  33   0   -1.80    2.50
   1  33   0   -2.70    3.40
   1  33   0   -0.40    1.90
   1  33   0   -2.00    2.30
  -2  33   0   29.30    3.80
   2  33   0   27.70    3.20
   3  33   0    1.80    2.00
   3  33   0    1.10    3.10
  -3  33   0    4.60    3.00
   4  33   0  124.79    8.00
   5  33   0   -0.60    3.10
   5  33   0    0.60    2.10
   6  33   0   13.60    2.80
   6  33   0   25.10    4.40
   7  33   0   -2.00    3.20
   7  33   0   -2.00    2.20
  -7  33   0   -3.30    2.60
  -8  33   0    8.40    3.10
   8  33   0    7.10    2.70
  -9  33   0   -0.20    3.10
   9  33   0    3.70    2.60
 -10  33   0    3.60    3.30
  10  33   0    0.20    2.80
   0  34   0    2.20    2.60
  -1  34   0   26.80    3.70
   1  34   0   25.40    3.10
  -2  34   0   19.20    3.50
   2  34   0   11.40    2.50
   2  34   0   25.70    4.40
   3  34   0   12.60    3.80
   3  34   0   21.00    3.10
   4  34   0   22.10    3.20
   4  34   0   32.40    4.70
   5  34   0    2.20    2.30
   5  34   0   -0.10    3.20
   6  34   0   14.50    3.90
   6  34   0   13.70    2.80
   7  34   0   -1.80    3.20
   7  34   0    0.90    2.30
  -8  34   0    8.80    3.20
   8  34   0    9.80    2.80
  -9  34   0    0.80    3.10
   9  34   0    0.30    2.50
  10  34   0    2.30    2.80
 -10  34   0    4.60    3.50
   1  35   0    6.90    2.30
   2  35   0   25.30    3.30
   2  35   0   19.20    4.50
   3  35   0   24.40    3.30
   3  35   0   19.70    4.50
   4  35   0   38.20    5.20
   4  35   0   43.40    3.80
   5  35   0   11.80    2.70
   5  35   0   10.00    4.00
   6  35   0   29.40    4.80
   6  35   0   22.00    3.50
   7  35   0    8.10    2.80
   7  35   0    5.20    3.60
   8  35   0    8.70    2.80
   9  35   0    0.00    2.60
  -9  35   0    3.40    3.30
 -10  35   0   10.90    3.70
  10  35   0    8.90    3.20
   0  36   0  169.88    7.30
   1  36   0    4.60    2.30
   2  36   0  126.09    8.30
   3  36   0   33.60    3.50
   3  36   0   21.50    4.70
   4  36   0  323.07   11.20
   4  36   0  247.28   14.60
   5  36   0   28.80    3.60
   5  36   0   20.70    4.80
   6  36   0   99.89    5.60
   6  36   0   78.79    6.90
   7  36   0   23.80    3.60
   7  36   0   20.80    4.40
   8  36   0   44.10    4.30
   9  36   0   18.60    3.40
   0  37   0    4.20    2.30
   1  37   0   38.30    3.70
   2  37   0    8.30    2.60
   3  37   0   55.99    6.10
   3  37   0   82.59    4.70
   4  37   0    6.00    2.50
   5  37   0   64.49    6.30
   5  37   0   68.89    4.70
   6  37   0   38.40    5.30
   7  37   0   33.30    4.00
   8  37   0   -1.80    2.50
   9  37   0   25.90    4.00
   0  38   0    0.10    2.10
   1  38   0  427.76   15.40
   2  38   0    1.40    4.10
   2  38   0    5.50    2.40
   3  38   0  349.07   17.70
   4  38   0    8.00    4.10
   4  38   0   10.50    2.80
   5  38   0  274.77   10.10
   5  38   0  208.08   13.00
   6  38   0    8.50    2.90
   6  38   0    8.20    4.10
   7  38   0   89.49    5.60
   8  38   0   11.90    3.10
   9  38   0   48.50    4.70
   0  39   0   15.60    2.80
   1  39   0    6.20    2.60
   2  39   0   26.20    3.50
   2  39   0   15.10    4.90
   4  39   0   21.10    4.90
   6  39   0   14.40    3.20
   6  39   0   16.80    4.50
   7  39   0    1.20    2.60
   8  39   0   12.20    3.20
   9  39   0    3.60    3.00
   0  40   0  245.78   10.00
   1  40   0    3.00    2.70
   2  40   0  215.78    9.20
   3  40   0    6.10    4.10
   3  40   0   -0.70    2.40
   4  40   0  117.29    8.50
   5  40   0    2.50    4.10
   5  40   0    0.00    2.40
   6  40   0   42.00    5.80
   6  40   0   53.89    4.60
   7  40   0   -1.40    2.60
   8  40   0   13.30    3.30
   0  41   0    3.90    2.50
   1  41   0    2.80    2.50
   2  41   0    2.50    2.50
   3  41   0   -1.00    4.10
   3  41   0    0.60    2.50
   5  41   0    2.70    4.10
   5  41   0    3.90    2.70
   6  41   0   45.30    6.10
   7  41   0   -1.60    2.70
   8  41   0    5.70    3.00
   0  42   0    8.70    2.80
   1  42   0    3.70    2.60
  -1  42   0    2.40    2.40
   2  42   0    8.20    2.70
   3  42   0    3.50    2.70
   3  42   0    4.40    4.30
   4  42   0    8.50    2.90
   4  42   0    4.80    4.30
   5  42   0    1.90    2.60
   5  42   0   -4.60    4.00
   6  42   0   23.50    3.90
   7  42   0    9.10    3.20
   0  43   0    9.50    2.90
  -1  43   0    1.00    2.50
   1  43   0    2.50    2.60
   2  43   0   10.60    3.00
   3  43   0    2.10    4.50
   3  43   0   -1.00    2.60
   4  43   0    6.90    2.80
   4  43   0    8.50    4.70
   5  43   0    4.60    4.40
   5  43   0   10.30    3.00
   6  43   0   16.20    3.40
   7  43   0    2.20    2.90
   0  44   0  179.88    8.20
  -1  44   0    5.60    2.80
   1  44   0    6.70    2.80
   2  44   0  186.38    8.50
   3  44   0    8.10    4.90
   3  44   0    5.40    2.80
   4  44   0   84.29    5.50
   5  44   0   12.90    5.00
   5  44   0   28.00    4.00
   6  44   0   43.80    4.40
   0  45   0    5.60    2.90
  -1  45   0   16.00    3.20
   1  45   0   13.50    3.20
   2  45   0    0.90    2.80
   3  45   0    4.10    2.80
   5  45   0   26.40    4.00
   5  45   0   32.20    6.00
   6  45   0    1.30    2.80
   0  46   0   -4.20    2.80
   1  46   0  257.47   10.60
  -1  46   0  247.38   10.50
   2  46   0   -1.50    2.60
   3  46   0  152.78    7.60
   4  46   0    0.20    4.60
   4  46   0    2.20    2.80
   5  46   0   68.29    5.20
   0  47   0   10.90    3.20
   1  47   0    2.90    2.90
  -1  47   0    3.80    2.90
  -2  47   0    3.40    2.80
   2  47   0    2.70    2.90
   3  47   0    1.20    2.80
   4  47   0    7.90    3.20
   5  47   0    1.50    2.80
   0  48   0  168.28    8.10
  -1  48   0    7.20    3.20
   1  48   0    7.80    3.10
   2  48   0   42.80    4.60
  -2  48   0   47.10    4.50
   3  48   0    1.50    2.90
   4  48   0   18.40    3.60
   0  49   0    5.10    3.00
  -1  49   0    3.10    3.00
   1  49   0   -1.00    2.80
   2  49   0    3.90    3.10
  -2  49   0   -1.70    2.80
   3  49   0   -2.60    2.70
   0  50   0   10.70    3.50
   1  50   0    1.20    2.90
  -1  50   0   -0.30    3.00
 -14   0   1    4.80    3.50
 -13   0   1   31.90    4.10
 -12   0   1    1.50    2.70
  12   0  -1   -2.40    2.00
 -11   0   1    8.20    2.60
  11   0  -1    7.20    2.10
  11   0  -1    3.60    2.00
 -10   0   1    4.40    2.90
 -10   0   1   -1.00    2.10
  10   0  -1    0.80    1.70
  10   0  -1    0.00    1.70
   9   0  -1    3.30    3.20
  -9   0   1    1.30    1.90
   9   0  -1    3.30    1.60
   9   0  -1    3.30    1.60
  -9   0   1    2.10    2.30
   8   0  -1    2.60    3.00
  -8   0   1    2.60    1.70
   8   0  -1    0.40    1.30
   8   0  -1    0.20    1.30
  -8   0   1    0.30    2.00
   7   0  -1    2.70    3.40
   7   0  -1    3.60    1.30
  -7   0   1    0.70    1.40
   7   0  -1    2.50    1.10
  -7   0   1    3.50    1.70
  -7   0   1    3.40    1.80
   7   0  -1    4.50    1.50
   6   0  -1   -0.20    0.90
  -6   0   1    0.00    1.10
   6   0  -1    1.10    1.00
  -6   0   1    1.10    1.50
   6   0  -1   -0.50    1.10
  -6   0   1   -0.70    1.40
   5   0  -1   14.50    1.40
  -5   0   1   13.50    1.50
   5   0  -1   13.90    1.60
  -5   0   1   16.90    1.80
  -5   0   1   12.30    1.80
   5   0  -1   10.80    1.30
  -4   0   1    2.00    1.00
  -4   0   1    0.40    0.80
   4   0  -1    1.30    0.90
   4   0  -1    0.60    0.60
   4   0  -1    1.20    0.70
   3   0  -1    8.50    0.80
  -3   0   1   10.00    1.10
   3   0  -1   11.50    1.00
   2   0  -1    2.70    0.60
   2   0  -1    3.10    0.50
   2   0  -1    1.50    0.30
  -2   0   1    2.70    0.60
  -2   0   1    1.80    0.40
   2   0   1    0.20    0.50
  -2   0  -1    1.20    0.60
  -2   0  -1    1.10    0.60
   3   0   1    3.60    0.90
  -3   0  -1    1.70    0.90
  -4   0  -1   -1.30    1.10
   4   0   1    0.50    0.80
   4   0   1   -0.30    0.70
  -5   0  -1   24.30    2.20
  -5   0  -1   20.40    1.80
   5   0   1   25.30    1.70
   5   0   1   19.10    1.80
   6   0   1    1.70    1.10
   6   0   1    1.10    1.20
   6   0   1    2.70    1.40
  -6   0  -1   -2.30    1.60
  -6   0  -1   -0.90    1.30
  -7   0  -1  184.08    7.20
  -7   0  -1  200.58    7.70
   7   0   1  192.18    8.00
   7   0   1  190.38    7.00
  -8   0  -1   -4.90    2.20
  -8   0  -1   -2.60    1.80
   8   0   1   -1.30    1.40
   8   0   1    1.00    1.50
  -9   0  -1   72.49    4.20
   9   0   1   79.09    4.20
 -10   0  -1   -6.60    2.20
  10   0   1   -0.30    1.90
 -11   0  -1  102.49    5.50
 -12   0  -1   -3.80    2.80
 -13   0  -1   59.59    5.00
 -14   0  -1   -4.80    3.40
 -14  -1   1    1.50    3.40
 -14   1   1    0.20    3.40
 -13  -1   1    8.50    3.20
 -13   1   1    9.90    3.30
 -12  -1   1   -2.10    2.60
  12   1  -1    1.40    2.10
 -12   1   1   -2.70    2.50
 -11  -1   1    0.60    2.40
  11  -1  -1    2.30    2.10
  11  -1  -1   -1.30    1.80
 -11   1   1   -2.90    2.30
  11   1  -1   -0.20    2.00
  11   1  -1    0.30    1.90
 -10  -1   1    5.40    3.30
  10  -1  -1    3.00    1.80
  10  -1  -1    2.00    1.80
 -10  -1   1    0.40    2.10
 -10   1   1   -0.30    2.00
 -10   1   1    4.30    2.70
  10   1  -1    1.80    1.70
  10   1  -1    0.70    1.70
   9  -1  -1    5.40    1.70
   9  -1  -1    7.20    1.80
   9  -1  -1   -2.20    3.30
  -9  -1   1    1.40    1.90
  -9  -1   1    4.20    2.30
   9   1  -1    5.30    1.70
   9   1  -1    6.00    1.60
   9   1  -1    1.80    3.10
  -9   1   1    4.60    2.00
  -9   1   1    4.10    2.40
  -8  -1   1    2.80    1.70
  -8  -1   1    6.20    2.10
   8  -1  -1    4.70    1.40
   8  -1  -1    6.50    4.10
   8  -1  -1    4.80    1.50
  -8   1   1    4.20    1.80
   8   1  -1    5.20    1.40
   8   1  -1    6.70    2.80
   8   1  -1    3.70    1.60
  -8   1   1    2.90    2.00
   8   1  -1    5.20    1.50
  -7  -1   1   10.30    1.90
  -7  -1   1    7.60    2.10
   7  -1  -1   12.50    1.80
   7  -1  -1    8.20    1.50
   7  -1  -1    7.00    1.60
  -7  -1   1    6.90    1.60
  -7   1   1    8.10    2.00
   7   1  -1    9.50    1.70
   7   1  -1    8.30    1.60
   7   1  -1   10.20    1.70
  -7   1   1    8.50    1.70
   7   1  -1    4.80    2.60
  -7   1   1   10.20    1.90
   6  -1  -1    0.30    0.90
   6  -1  -1   -1.30    1.00
  -6  -1   1    0.10    1.10
  -6  -1   1   -0.30    1.40
  -6  -1   1    0.40    1.40
   6  -1  -1    0.20    1.00
   6   1  -1   -1.50    1.10
  -6   1   1    1.30    1.50
   6   1  -1   -0.50    0.90
   6   1  -1   -2.00    2.50
   6   1  -1    0.80    1.00
  -6   1   1   -1.20    1.10
  -6   1   1   -0.30    1.40
  -5  -1   1   48.00    2.40
   5  -1  -1   46.90    2.50
   5  -1  -1   45.30    2.50
  -5  -1   1   51.39    2.70
   5  -1  -1   53.39    2.40
  -5  -1   1   53.29    2.80
   5   1  -1   46.80    2.50
  -5   1   1   52.79    2.80
  -5   1   1   48.40    2.50
  -5   1   1   51.09    2.80
   5   1  -1   49.80    2.50
   5   1  -1   43.70    4.30
   5   1  -1   51.79    2.40
  -4  -1   1    1.90    1.00
   4  -1  -1    1.20    0.60
   4  -1  -1    1.20    0.70
   4  -1  -1    1.30    0.90
  -4  -1   1    0.30    0.80
   4   1  -1    1.00    0.90
   4   1  -1    0.20    2.00
   4   1  -1    0.30    0.60
  -4   1   1    1.70    1.00
  -4   1   1    1.80    0.90
   4   1  -1    1.20    0.70
  -3  -1   1   58.79    2.60
   3  -1  -1   55.29    2.20
   3  -1  -1   58.39    2.50
  -3   1   1   58.79    2.60
   3   1  -1   59.19    3.60
   3   1  -1   54.19    2.40
   3   1  -1   55.69    2.20
  -3   1   1   52.49    2.30
   2  -1  -1    0.70    0.30
  -2  -1   1    1.00    0.40
   2  -1  -1    0.80    0.40
  -2  -1   1    0.30    0.30
   2  -1  -1    1.20    0.40
  -2   1   1    0.50    0.30
   2   1  -1    0.50    0.40
   2   1  -1    0.70    0.40
   2   1  -1    0.30    0.70
   2   1  -1    0.70    0.30
  -2   1   1    0.80    0.50
  -1   1   1    1.70    0.20
  -1   1   1    1.30    0.20
   0  -1  -1   -0.10    0.10
  -1  -1  -1    4.70    0.40
   1   1   1    5.70    0.40
   2  -1   1   29.50    1.50
  -2  -1  -1   30.90    1.50
  -2  -1  -1   32.20    1.40
   2  -1   1   33.20    1.60
  -2   1  -1   32.10    1.40
   2   1   1   32.00    1.50
   3  -1   1   43.00    2.20
  -3  -1  -1   47.30    2.20
  -3  -1  -1   45.20    2.00
  -3   1  -1   42.60    2.20
   3   1   1   46.20    2.10
  -3   1  -1   40.90    2.10
  -3   1  -1   42.50    2.00
   4  -1   1    3.00    0.80
  -4  -1  -1    2.70    1.00
  -4  -1  -1    1.80    1.20
   4   1   1    3.50    0.90
  -4   1  -1    5.20    1.30
   4   1   1    2.70    0.80
   5  -1   1   79.39    3.30
   5  -1   1   89.89    3.70
  -5  -1  -1   73.89    3.40
  -5  -1  -1   78.19    3.60
  -5   1  -1   76.59    3.70
  -5   1  -1   73.69    3.40
   5   1   1   82.29    3.30
   5   1   1   76.79    3.70
  -6  -1  -1   66.89    3.70
  -6  -1  -1   72.49    3.40
   6  -1   1   69.89    3.50
   6  -1   1   80.09    3.30
   6  -1   1   75.49    3.50
  -6   1  -1   65.99    3.40
   6   1   1   72.59    3.60
   6   1   1   70.69    3.40
  -6   1  -1   72.69    3.80
   6   1   1   74.29    3.30
   6   1   1   63.79    5.60
  -7  -1  -1  335.87   11.80
  -7  -1  -1  351.26   12.40
   7  -1   1  360.06   11.80
   7  -1   1  352.56   13.80
  -7   1  -1  346.37   12.40
   7   1   1  360.16   11.80
  -7   1  -1  322.97   11.80
   7   1   1  343.87   13.70
   8  -1   1   58.79    3.30
   8  -1   1   52.49    3.30
  -8  -1  -1   49.00    3.40
  -8  -1  -1   49.50    3.90
   8   1   1   60.09    3.30
   8   1   1   59.19    3.30
  -8   1  -1   51.59    3.90
  -8   1  -1   48.00    3.40
  -9  -1  -1   88.79    4.70
   9  -1   1   92.89    4.60
   9   1   1   91.99    4.60
  -9   1  -1   85.79    4.70
 -10  -1  -1   31.80    3.50
  10  -1   1   37.60    3.20
  10   1   1   40.60    3.20
 -10   1  -1   36.70    3.50
 -11  -1  -1   68.59    4.60
 -11   1  -1   66.89    4.50
 -12  -1  -1   -0.10    2.80
 -12   1  -1   -0.50    2.90
 -13  -1  -1   19.60    3.70
 -13   1  -1   22.50    3.80
 -14  -1  -1   -2.40    3.40
 -14   1  -1    2.90    3.50
 -14  -2   1   41.70    4.70
 -14   2   1   33.80    4.60
 -13  -2   1    5.10    3.20
 -13   2   1    3.10    3.20
 -12  -2   1    3.70    2.80
 -12   2   1    4.60    2.80
  12   2  -1    0.40    2.20
  11  -2  -1   -0.80    1.90
  11  -2  -1    2.70    2.10
 -11  -2   1   -1.40    2.40
  11   2  -1    1.00    2.00
 -11   2   1   -0.10    2.40
  11   2  -1    1.60    2.00
  10  -2  -1    1.20    1.70
 -10  -2   1    3.40    2.20
  10  -2  -1    1.70    1.70
  10   2  -1    1.80    1.80
  10   2  -1    1.20    1.70
 -10   2   1    6.30    2.80
 -10   2   1    5.90    2.30
   9  -2  -1    2.00    1.60
   9  -2  -1    0.90    4.50
  -9  -2   1    1.20    1.90
   9  -2  -1    0.60    1.50
  -9  -2   1    2.20    2.50
   9   2  -1    2.10    3.10
  -9   2   1   -1.50    2.20
  -9   2   1    0.60    1.90
   9   2  -1    1.10    1.50
   9   2  -1    1.90    1.50
   8  -2  -1    2.20    1.30
   8  -2  -1    2.00    1.40
  -8  -2   1    2.20    1.90
  -8  -2   1    0.80    1.60
   8   2  -1    2.30    1.40
  -8   2   1    0.80    2.00
   8   2  -1    0.90    2.70
   8   2  -1    1.60    1.30
   8   2  -1    2.80    1.60
  -8   2   1    0.50    1.60
  -7  -2   1   17.10    2.10
   7  -2  -1   19.20    2.00
   7  -2  -1   19.30    1.90
  -7  -2   1   17.70    2.40
   7  -2  -1   16.80    1.80
  -7  -2   1   19.60    2.40
   7   2  -1   15.40    1.70
   7   2  -1   20.30    3.50
  -7   2   1   17.60    2.10
   7   2  -1   18.60    1.90
   7   2  -1   15.10    2.00
  -7   2   1   19.70    2.50
  -7   2   1   14.50    2.30
   6  -2  -1    3.30    1.10
  -6  -2   1    3.70    1.20
  -6  -2   1    3.30    1.60
   6  -2  -1    2.90    1.00
  -6  -2   1    4.20    1.40
   6  -2  -1    3.30    1.30
  -6   2   1    2.30    1.60
   6   2  -1    3.00    2.00
   6   2  -1    2.80    1.00
  -6   2   1    2.20    1.40
   6   2  -1    4.20    1.30
   6   2  -1    3.60    1.10
  -6   2   1    3.20    1.30
  -5  -2   1  270.97    9.40
   5  -2  -1  273.57    9.10
   5  -2  -1  261.67   10.60
  -5  -2   1  268.67   10.80
   5  -2  -1  267.07    9.30
  -5  -2   1  273.37    9.10
  -5   2   1  288.97    9.20
   5   2  -1  267.07    9.30
  -5   2   1  266.27   10.80
  -5   2   1  282.87    9.50
   5   2  -1  259.57   10.60
   5   2  -1  289.67   12.70
   5   2  -1  263.37    9.00
   4  -2  -1    0.30    0.90
  -4  -2   1    0.80    0.80
   4  -2  -1    1.30    0.80
  -4  -2   1    1.70    1.00
   4  -2  -1   -0.40    0.70
   4   2  -1   -0.70    0.80
   4   2  -1   -0.50    1.30
  -4   2   1    1.80    1.00
   4   2  -1   -0.30    0.60
  -4   2   1    0.00    0.80
   4   2  -1    1.00    0.80
   3  -2  -1  430.16   13.40
   3  -2  -1  419.66   16.00
  -3  -2   1  424.46   16.10
   3   2  -1  422.76   13.40
  -3   2   1  420.96   13.40
   3   2  -1  447.16   18.70
  -3   2   1  404.86   16.10
   3   2  -1  406.56   16.00
   2  -2  -1    2.50    0.50
  -2  -2   1    0.80    0.40
  -2  -2   1    1.40    0.50
   2  -2  -1    1.70    0.50
   2  -2  -1    1.80    0.40
   2   2  -1    0.90    0.30
   2   2  -1    1.60    0.50
  -2   2   1    1.80    0.40
   2   2  -1    1.70    0.60
   2   2  -1    2.20    0.40
  -2   2   1    2.90    0.60
  -1   2   1  703.43   25.50
   1   2  -1  656.53   29.30
   0   2   1    0.10    0.20
  -1  -2  -1 1721.63   66.29
   1   2   1 1793.62   76.29
   1   2   1 1810.52   66.29
  -2  -2  -1    1.80    0.50
   2  -2   1    1.20    0.60
  -2  -2  -1    5.10    0.70
   2   2   1    3.00    0.60
   2   2   1    4.00    0.90
  -2   2  -1    4.90    0.70
  -3  -2  -1  890.11   28.10
  -3  -2  -1  890.21   27.60
   3  -2   1  871.91   33.20
   3   2   1  869.21   33.10
   3   2   1  855.01   27.60
   3   2   1  932.41   38.40
  -3   2  -1  869.41   27.60
  -3   2  -1  866.61   28.10
   4  -2   1   -0.30    0.80
  -4  -2  -1    0.10    0.90
  -4  -2  -1    0.50    1.20
   4  -2   1    1.10    0.80
   4   2   1    1.40    1.90
  -4   2  -1   -5.00    1.40
  -4   2  -1    2.80    1.20
  -4   2  -1    0.60    0.90
   4   2   1   -0.10    0.80
   4   2   1    0.20    0.70
  -5  -2  -1  680.93   22.20
   5  -2   1  680.83   21.60
  -5  -2  -1  672.13   21.70
   5  -2   1  658.53   25.90
   5   2   1  677.43   25.80
  -5   2  -1  673.73   21.70
   5   2   1  688.83   21.70
  -5   2  -1  697.03   22.20
   6  -2   1   62.39    3.20
  -6  -2  -1   61.49    3.50
   6  -2   1   61.09    3.30
   6  -2   1   67.79    3.10
  -6  -2  -1   58.19    3.10
  -6   2  -1   57.39    3.10
   6   2   1   54.59    4.40
   6   2   1   69.99    3.10
  -6   2  -1   64.99    3.60
   6   2   1   66.79    3.20
   6   2   1   60.09    3.20
   7  -2   1  722.23   28.80
  -7  -2  -1  763.52   24.30
   7  -2   1  777.32   24.30
  -7  -2  -1  773.52   25.00
   7   2   1  767.52   24.20
   7   2   1  734.93   28.80
  -7   2  -1  718.83   24.30
  -7   2  -1  762.82   25.00
  -8  -2  -1  103.89    5.30
  -8  -2  -1   99.49    4.70
   8  -2   1   96.19    4.80
   8  -2   1   99.39    4.50
   8   2   1  101.99    4.50
  -8   2  -1   94.49    4.60
   8   2   1   97.99    4.70
  -8   2  -1   99.19    5.20
   9  -2   1  151.78    6.90
  -9  -2  -1  158.28    6.50
   9   2   1  157.38    6.90
  -9   2  -1  149.99    6.50
  10  -2   1   85.39    4.70
 -10  -2  -1   86.09    4.80
 -10   2  -1   77.19    4.70
  10   2   1   84.89    4.60
 -11  -2  -1   56.49    4.30
 -11   2  -1   51.79    4.20
 -12  -2  -1   27.50    3.90
 -12   2  -1   26.60    3.90
 -13  -2  -1   11.00    3.40
 -13   2  -1    7.80    3.50
 -14  -2  -1   34.00    4.70
 -14   2  -1   33.30    4.70
 -14   3   1   32.20    4.60
 -13  -3   1    0.60    3.00
 -13   3   1   -0.10    3.10
 -12  -3   1    5.30    2.90
  12   3  -1    5.60    2.30
 -12   3   1    5.00    2.80
  11  -3  -1   -1.20    1.90
  11  -3  -1    2.40    2.00
 -11  -3   1   -0.60    2.40
 -11   3   1    2.60    2.40
  11   3  -1    2.90    2.00
  11   3  -1    3.00    2.00
  10  -3  -1   -0.10    1.70
 -10  -3   1    1.20    2.10
  10  -3  -1    1.20    1.80
 -10   3   1    1.70    2.60
 -10   3   1   -2.30    2.10
  10   3  -1    0.50    1.70
  10   3  -1    1.90    1.80
   9  -3  -1    0.60    1.50
  -9  -3   1    2.60    2.00
  -9  -3   1    3.50    2.50
   9  -3  -1    1.70    1.50
  -9   3   1   -0.40    1.80
  -9   3   1    0.10    2.30
   9   3  -1    2.20    2.50
   9   3  -1    4.00    1.60
   9   3  -1    4.70    1.60
   8  -3  -1   -1.20    1.20
  -8  -3   1    1.00    1.60
   8  -3  -1    1.20    1.40
  -8  -3   1    0.50    1.80
   8   3  -1    1.80    2.50
   8   3  -1    1.20    1.50
  -8   3   1   -0.70    2.00
  -8   3   1   -1.40    1.50
   8   3  -1   -0.80    1.20
   8   3  -1    0.10    1.30
  -7  -3   1    3.30    1.40
  -7  -3   1    1.90    1.80
  -7  -3   1    4.00    1.70
   7  -3  -1    2.10    1.20
   7  -3  -1    4.10    1.50
   7  -3  -1    4.30    1.20
  -7   3   1    3.30    1.80
   7   3  -1    4.70    1.30
  -7   3   1    3.40    1.80
   7   3  -1    4.10    1.20
   7   3  -1    2.60    1.50
  -7   3   1    0.70    1.40
   7   3  -1   -0.80    2.30
   6  -3  -1   29.60    1.90
   6  -3  -1   31.80    2.20
  -6  -3   1   30.60    2.50
  -6  -3   1   26.90    2.10
  -6  -3   1   29.80    2.40
   6  -3  -1   28.60    2.00
  -6   3   1   29.80    2.40
   6   3  -1   23.30    3.40
   6   3  -1   28.80    1.90
  -6   3   1   29.00    2.20
  -6   3   1   27.50    2.40
   6   3  -1   27.20    2.00
   6   3  -1   28.80    2.10
  -5  -3   1    7.30    1.50
  -5  -3   1   10.50    1.60
   5  -3  -1    7.60    1.30
   5  -3  -1    7.40    1.20
  -5  -3   1    7.60    1.20
   5  -3  -1    6.90    1.20
   5   3  -1    6.60    2.00
   5   3  -1    8.00    1.10
   5   3  -1    7.90    1.30
  -5   3   1    4.60    1.20
  -5   3   1    8.50    1.70
   5   3  -1    6.20    1.20
  -5   3   1    4.00    1.50
   4  -3  -1   43.70    2.30
   4  -3  -1   47.60    2.30
   4  -3  -1   49.90    2.20
  -4  -3   1   47.00    2.20
  -4  -3   1   51.29    2.50
   4   3  -1   45.10    2.20
   4   3  -1   46.10    2.10
  -4   3   1   49.99    2.50
  -4   3   1   44.90    2.20
   4   3  -1   43.50    2.20
   4   3  -1   39.40    3.10
   3  -3  -1    1.20    0.60
   3  -3  -1    0.70    0.60
  -3  -3   1    4.30    0.80
  -3   3   1    1.50    0.80
   3   3  -1    0.50    0.50
   3   3  -1    0.30    0.80
   3   3  -1    0.00    0.60
  -2  -3   1   51.99    2.40
   2  -3  -1   61.89    2.60
   2  -3  -1   62.19    2.20
  -2  -3   1   62.69    2.50
   2  -3  -1   60.99    2.50
  -2   3   1   65.09    2.60
   2   3  -1   59.99    2.50
   2   3  -1   55.79    2.90
  -2   3   1   57.39    2.50
   2   3  -1   61.39    2.10
   2   3  -1   58.69    2.40
   1  -3  -1    5.40    0.40
   1   3  -1    4.70    0.50
  -1   3   1    6.20    0.50
  -1   3   1    4.80    0.40
   0   3   1    4.00    0.50
   0   3   1    2.50    0.20
  -1  -3  -1    2.50    0.40
   1   3   1    2.30    0.50
  -1   3  -1    1.90    0.40
   1   3   1    2.10    0.40
  -2  -3  -1   24.40    1.30
  -2  -3  -1   24.90    1.30
  -2   3  -1   27.00    1.30
   2   3   1   27.90    1.70
   2   3   1   25.50    1.30
  -3  -3  -1    3.40    0.80
   3  -3   1    3.50    0.80
  -3  -3  -1    5.00    1.10
  -3   3  -1    0.30    1.00
   3   3   1    3.20    1.30
  -3   3  -1    3.30    0.80
   3   3   1    3.50    0.70
  -3   3  -1    3.60    1.10
   3   3   1    4.80    0.80
  -4  -3  -1   18.90    1.80
   4  -3   1   22.00    1.50
  -4  -3  -1   18.40    1.60
   4  -3   1   22.70    1.70
   4   3   1   20.80    1.50
  -4   3  -1   25.00    2.10
  -4   3  -1   21.10    1.60
   4   3   1   21.40    1.50
   4   3   1   26.80    2.70
  -4   3  -1   17.00    1.80
   5  -3   1   44.40    2.30
  -5  -3  -1   41.70    2.30
  -5  -3  -1   38.30    2.60
   5  -3   1   39.60    2.50
   5   3   1   42.80    3.60
   5   3   1   44.20    2.30
   5   3   1   42.20    2.40
  -5   3  -1   37.70    2.30
  -5   3  -1   41.10    2.60
   6  -3   1  279.27   10.90
   6  -3   1  273.47    9.30
  -6  -3  -1  263.17    9.70
  -6  -3  -1  263.77    9.30
   6   3   1  277.17    9.30
   6   3   1  273.37   10.80
   6   3   1  261.27    9.50
  -6   3  -1  272.87    9.70
  -6   3  -1  261.47    9.30
  -7  -3  -1   31.30    2.70
   7  -3   1   39.50    2.50
   7  -3   1   37.00    2.50
  -7  -3  -1   27.80    3.00
   7   3   1   32.50    2.40
   7   3   1   36.50    2.50
  -7   3  -1   31.40    2.70
  -7   3  -1   26.80    3.10
   8  -3   1  289.87   11.50
   8  -3   1  287.07   10.00
  -8  -3  -1  287.07   10.60
  -8  -3  -1  274.87   10.10
   8   3   1  280.37   11.40
  -8   3  -1  257.17   10.00
   8   3   1  284.47   10.00
  -8   3  -1  282.87   10.60
  -9  -3  -1   23.40    2.90
   9  -3   1   26.00    2.60
  -9   3  -1   17.20    2.90
   9   3   1   25.60    2.50
   9   3   1   24.70    2.70
  10  -3   1  138.39    6.40
 -10  -3  -1  124.29    6.10
 -10   3  -1  128.29    6.10
  10   3   1  139.29    6.40
 -11  -3  -1   13.40    3.00
 -11   3  -1   12.20    3.00
 -12  -3  -1   43.50    4.40
 -12   3  -1   53.89    4.60
 -13  -3  -1    8.80    3.40
 -13   3  -1    5.40    3.30
 -14  -3  -1   29.90    4.50
 -14   3  -1   35.70    4.50
 -14   4   1   32.80    4.60
 -13  -4   1   -1.30    2.90
 -13   4   1   -3.40    2.90
 -12  -4   1    7.90    3.00
 -12   4   1    9.40    3.00
  12   4  -1   10.20    2.50
 -11  -4   1    0.40    2.40
  11  -4  -1    2.20    2.10
  11  -4  -1   -2.10    1.80
  11   4  -1    2.00    2.00
  11   4  -1    2.20    2.00
 -11   4   1    3.00    2.60
  10  -4  -1    6.80    2.00
 -10  -4   1    3.90    2.20
  10  -4  -1    7.60    2.00
  10   4  -1    6.30    1.90
  10   4  -1    6.50    1.90
 -10   4   1    8.50    2.70
 -10   4   1    6.80    2.30
  10   4  -1    7.40    2.70
  -9  -4   1    7.50    2.90
   9  -4  -1    9.90    1.90
  -9  -4   1    8.20    2.20
   9  -4  -1    7.40    1.80
   9   4  -1    9.00    1.80
   9   4  -1    5.40    2.30
  -9   4   1    7.40    2.10
  -9   4   1    7.70    2.60
   9   4  -1    8.00    1.70
   8  -4  -1    0.80    1.30
   8  -4  -1    0.20    1.40
  -8  -4   1    1.70    1.60
  -8  -4   1    1.60    1.90
   8   4  -1    2.70    1.30
   8   4  -1    2.10    1.50
   8   4  -1    4.10    1.50
  -8   4   1    1.60    2.10
  -8   4   1   -0.60    1.60
   8   4  -1    0.40    1.90
   7  -4  -1    0.20    1.20
  -7  -4   1    0.70    1.50
  -7  -4   1    0.30    1.70
  -7  -4   1    0.60    1.40
   7  -4  -1    1.10    1.40
   7  -4  -1   -0.40    1.10
   7   4  -1   -0.50    1.60
  -7   4   1    1.10    1.70
   7   4  -1    0.70    1.10
  -7   4   1    0.20    1.70
   7   4  -1   -0.20    1.10
  -7   4   1   -0.70    1.40
   7   4  -1    0.00    1.30
  -6  -4   1   65.29    3.10
  -6  -4   1   69.99    3.50
   6  -4  -1   66.69    3.20
   6  -4  -1   64.59    3.30
   6  -4  -1   66.79    3.10
  -6  -4   1   70.99    3.70
   6   4  -1   69.69    3.20
  -6   4   1   63.19    3.10
  -6   4   1   64.39    3.50
   6   4  -1   64.39    3.20
   6   4  -1   68.29    3.10
  -6   4   1   61.09    3.60
   6   4  -1   72.19    4.30
  -5  -4   1    0.40    0.90
   5  -4  -1   -1.10    0.80
  -5  -4   1    2.10    1.20
  -5  -4   1    1.50    1.30
  -5   4   1    0.60    1.00
   5   4  -1   -0.40    1.20
   5   4  -1    0.70    1.00
   5   4  -1   -1.00    0.80
  -5   4   1    0.70    1.30
  -5   4   1   -1.10    1.10
   5   4  -1   -0.40    0.80
   4  -4  -1  657.33   20.20
  -4  -4   1  639.94   24.20
   4  -4  -1  632.14   24.10
  -4  -4   1  636.44   20.20
   4  -4  -1  638.34   20.50
   4   4  -1  604.84   24.00
   4   4  -1  637.84   20.10
  -4   4   1  647.84   20.20
   4   4  -1  641.14   27.90
  -4   4   1  602.44   24.20
   4   4  -1  649.83   20.50
   3  -4  -1   10.10    1.00
   3  -4  -1    6.60    0.90
  -3  -4   1   11.80    1.20
   3   4  -1   10.20    1.10
  -3   4   1    9.00    1.10
   3   4  -1    8.10    1.30
   3   4  -1    7.50    0.80
   3   4  -1    8.00    1.10
   3   4  -1    8.70    1.00
   2  -4  -1 1858.61   66.39
   2  -4  -1 1903.61   54.99
  -2  -4   1 1780.52   66.39
  -2  -4   1 1603.24   66.29
   2  -4  -1 1700.23   66.39
   2   4  -1 1749.53   66.29
   2   4  -1 1758.12   76.29
   2   4  -1 1848.22   54.99
  -2   4   1 1771.12   66.49
   2   4  -1 1805.02   66.39
  -2   4   1 1749.12   66.39
   1  -4  -1   -0.50    0.30
  -1  -4   1    0.00    0.20
   1  -4  -1    0.40    0.30
  -1  -4   1    0.00    0.20
  -1   4   1    0.30    0.30
  -1   4   1    0.20    0.40
   1   4  -1    0.10    0.40
   0  -4  -1 3021.10  115.89
   0   4   1 3210.88  115.99
   0   4   1 3057.89  133.19
  -1  -4  -1   -0.50    0.40
   1  -4   1    0.60    0.40
  -1  -4  -1    0.40    0.50
   1   4   1    0.20    0.40
  -1   4  -1    0.00    0.50
   1   4   1    0.30    0.70
  -2  -4  -1 4607.64  136.39
  -2  -4  -1 4162.48  164.88
  -2   4  -1 4272.57  164.88
  -2   4  -1 4399.46  136.39
  -2   4  -1 4625.54  138.79
   2   4   1 4439.26  189.88
   2   4   1 4415.26  165.08
  -3  -4  -1   -0.70    0.70
  -3  -4  -1   -0.90    1.00
   3  -4   1   -1.40    0.70
   3   4   1   -0.70    0.60
   3   4   1    0.00    0.90
  -3   4  -1    0.40    1.00
  -3   4  -1   -3.10    0.90
  -3   4  -1   -0.30    0.80
   3   4   1   -0.20    0.70
  -4  -4  -1 2636.54   81.59
   4  -4   1 2508.05   98.49
  -4  -4  -1 2543.05   82.99
   4  -4   1 2679.13   81.49
   4   4   1 2604.44   81.49
  -4   4  -1 2550.94   81.49
   4   4   1 2952.40  113.49
  -4   4  -1 2648.03   82.99
   4   4   1 2588.24   98.29
  -4   4  -1 2559.94   98.49
  -5  -4  -1    0.70    1.50
   5  -4   1    3.60    1.30
   5  -4   1    4.00    1.00
  -5  -4  -1    3.10    1.10
   5   4   1    4.60    1.10
   5   4   1    2.20    1.10
  -5   4  -1    6.80    1.40
   5   4   1    1.10    1.70
   5   4   1    1.70    1.20
  -5   4  -1    4.50    1.60
  -5   4  -1    9.40    2.10
   6  -4   1 1831.52   70.19
   6  -4   1 1910.31   58.29
  -6  -4  -1 1878.21   58.39
  -6  -4  -1 1866.21   59.49
   6   4   1 1874.61   58.29
  -6   4  -1 1908.81   59.49
   6   4   1 1809.22   70.09
  -6   4  -1 1794.82   58.29
   6   4   1 1902.21   59.39
  -7  -4  -1   -3.40    1.80
   7  -4   1    5.90    1.50
   7  -4   1    6.80    1.50
  -7  -4  -1   -2.50    1.50
   7   4   1   -0.80    1.20
  -7   4  -1   -2.90    1.60
   7   4   1    1.10    1.30
   7   4   1    2.30    2.30
  -7   4  -1    1.10    2.10
   8  -4   1 1014.60   31.90
   8  -4   1  982.70   38.00
  -8  -4  -1  986.30   32.00
  -8  -4  -1 1030.20   32.80
  -8   4  -1 1024.70   32.80
  -8   4  -1  961.90   31.90
   8   4   1  963.70   38.00
   8   4   1 1001.90   31.90
  -9  -4  -1   -2.90    1.90
   9  -4   1   -0.30    1.60
   9   4   1   -0.20    1.60
   9   4   1    0.80    1.70
  -9   4  -1   -5.20    2.00
 -10  -4  -1  272.87   10.30
  10  -4   1  272.27   11.40
  10   4   1  275.77   11.40
 -10   4  -1  266.97   10.20
 -11  -4  -1   -5.90    2.30
 -11   4  -1   -2.60    2.60
 -12  -4  -1   61.79    4.80
 -12   4  -1   69.99    4.90
 -13  -4  -1    4.20    3.30
 -13   4  -1    2.30    3.30
 -14  -4  -1   13.40    3.90
 -14   4  -1   11.20    3.80
 -14   5   1   21.50    4.10
 -13   5   1    1.80    3.10
 -12  -5   1    0.80    2.70
  12   5  -1    5.00    2.30
 -12   5   1    5.00    2.90
  11  -5  -1    4.60    2.30
 -11  -5   1    1.40    2.40
  11  -5  -1   -1.50    1.90
  11   5  -1    0.70    1.90
 -11   5   1   10.40    3.90
 -11   5   1    1.10    2.50
  11   5  -1   -1.10    1.80
 -10  -5   1    7.70    2.40
  10  -5  -1   11.70    2.30
  10  -5  -1   12.10    2.20
  10   5  -1    8.90    1.90
  10   5  -1    6.60    2.70
 -10   5   1   12.30    2.80
  10   5  -1    9.10    2.00
 -10   5   1    7.40    2.30
  -9  -5   1   11.30    3.10
  -9  -5   1    5.00    2.00
   9  -5  -1    4.60    1.70
   9  -5  -1    3.20    1.70
  -9   5   1    3.50    2.30
  -9   5   1    0.70    2.00
   9   5  -1    6.20    2.40
   9   5  -1    7.10    1.70
   9   5  -1    7.00    1.80
  -8  -5   1    0.20    1.50
  -8  -5   1   -0.60    2.00
   8  -5  -1    0.20    1.40
   8  -5  -1   -0.80    1.30
   8   5  -1   -1.30    1.20
   8   5  -1    0.40    1.30
   8   5  -1   -0.30    1.80
  -8   5   1   -1.60    1.60
  -8   5   1   -3.50    1.80
   8   5  -1    0.10    1.50
  -7  -5   1    2.10    1.40
   7  -5  -1    3.20    1.30
   7  -5  -1    1.40    1.20
   7  -5  -1    2.50    1.50
  -7  -5   1    2.90    1.60
  -7  -5   1    2.70    1.80
  -7   5   1    1.90    1.50
   7   5  -1    1.90    1.40
  -7   5   1    2.70    1.70
   7   5  -1    1.70    1.10
   7   5  -1    0.70    1.20
  -7   5   1    1.70    1.80
   7   5  -1    3.00    1.70
  -6  -5   1    7.10    1.40
  -6  -5   1    5.70    1.60
  -6  -5   1    8.20    1.60
   6  -5  -1    6.10    1.20
   6  -5  -1    7.50    1.30
   6  -5  -1    7.30    1.50
   6   5  -1    6.30    1.40
   6   5  -1    6.00    1.20
  -6   5   1    4.70    1.70
  -6   5   1    4.90    1.40
  -6   5   1    4.60    1.60
   6   5  -1    5.50    1.20
   6   5  -1    5.90    1.70
   5  -5  -1   15.30    1.50
  -5  -5   1   19.40    1.90
  -5  -5   1   16.90    1.60
   5  -5  -1   18.50    1.50
  -5  -5   1   16.90    1.80
   5  -5  -1   17.80    1.70
   5   5  -1   13.90    2.00
  -5   5   1   19.50    2.00
   5   5  -1   16.90    1.60
   5   5  -1   18.00    1.50
   5   5  -1   17.40    1.50
  -5   5   1   17.50    1.60
  -5   5   1   17.50    1.90
   4  -5  -1   35.70    2.00
   4  -5  -1   37.70    1.90
  -4  -5   1   33.80    1.90
   4  -5  -1   35.00    2.00
  -4  -5   1   39.70    2.20
   4   5  -1   33.90    1.90
  -4   5   1   33.30    1.90
   4   5  -1   34.60    1.80
   4   5  -1   34.20    2.50
   4   5  -1   36.40    2.00
  -4   5   1   37.80    2.20
  -4   5   1   37.80    2.20
   3  -5  -1  109.19    3.90
  -3  -5   1  112.19    4.60
   3  -5  -1  111.59    4.50
   3   5  -1  113.09    4.00
  -3   5   1  106.79    3.90
   3   5  -1  108.19    4.40
   3   5  -1  111.19    3.90
   3   5  -1  103.79    5.20
  -3   5   1  111.69    4.60
   3   5  -1  106.39    4.00
   2  -5  -1   22.30    1.30
  -2  -5   1   21.70    1.20
   2  -5  -1   21.60    1.30
   2  -5  -1   20.10    1.10
   2   5  -1   20.70    1.40
   2   5  -1   20.50    1.10
  -2   5   1   22.30    1.30
   2   5  -1   21.70    1.20
   2   5  -1   21.30    1.10
  -1  -5   1   26.70    1.20
   1  -5  -1   28.10    1.30
   1  -5  -1   27.60    1.40
   1   5  -1   26.50    1.50
  -1   5   1   29.00    1.40
   1   5  -1   27.80    1.10
   0  -5  -1    0.40    0.30
   0   5   1    0.10    0.50
   0   5   1    0.50    0.30
  -1  -5  -1   13.10    0.80
  -1  -5  -1   10.40    0.70
  -1   5  -1   12.50    0.80
   1   5   1   11.70    0.70
   1   5   1   10.70    1.00
  -2  -5  -1   47.80    2.30
  -2  -5  -1   57.59    2.10
  -2   5  -1   54.89    2.40
   2   5   1   62.09    2.90
  -2   5  -1   50.79    2.30
   2   5   1   53.39    2.30
  -2   5  -1   48.50    2.10
  -3  -5  -1    0.70    1.00
   3  -5   1   -0.60    0.70
  -3  -5  -1   -0.30    0.70
   3   5   1    0.00    0.60
  -3   5  -1   -0.50    0.80
  -3   5  -1    1.10    0.90
   3   5   1   -0.50    0.90
   3   5   1   -0.30    0.70
  -3   5  -1   -1.20    1.00
  -4  -5  -1  209.08    7.50
   4  -5   1  229.88    7.50
  -4  -5  -1  217.98    7.80
   4  -5   1  225.18    8.90
   4   5   1  220.48   10.20
  -4   5  -1  234.08    8.90
   4   5   1  223.98    8.70
  -4   5  -1  200.78    7.40
   4   5   1  221.68    7.50
  -4   5  -1  219.88    7.80
   5  -5   1    1.20    1.00
   5  -5   1    0.80    1.20
  -5  -5  -1    2.60    1.50
  -5  -5  -1   -0.60    1.00
  -5   5  -1    3.40    2.00
   5   5   1    0.80    1.00
  -5   5  -1   -0.80    1.10
   5   5   1    1.00    0.90
   5   5   1    3.10    1.20
  -5   5  -1   -1.70    1.40
   5   5   1    1.50    1.30
   6  -5   1  201.98    7.20
   6  -5   1  198.18    8.40
  -6  -5  -1  192.48    7.60
  -6  -5  -1  197.78    7.30
   6   5   1  195.58    9.80
  -6   5  -1  194.68    7.60
  -6   5  -1  234.58    9.00
   6   5   1  196.58    7.40
  -6   5  -1  191.08    7.30
   6   5   1  203.48    8.20
   6   5   1  199.48    7.20
  -7  -5  -1    4.20    1.70
  -7  -5  -1    6.80    2.10
   7  -5   1    7.80    1.60
   7  -5   1    6.80    1.60
   7   5   1    8.30    1.60
  -7   5  -1    5.50    2.20
  -7   5  -1    5.20    1.90
   7   5   1    8.90    1.70
   7   5   1   14.70    2.60
  -8  -5  -1  221.08    8.50
   8  -5   1  229.08    9.60
  -8  -5  -1  235.28    9.10
   8  -5   1  241.18    8.50
  -8   5  -1  227.18    9.00
  -8   5  -1  224.48    8.60
   8   5   1  234.28    9.60
   8   5   1  226.38    8.40
  -9  -5  -1   24.50    3.00
   9  -5   1   29.70    2.70
   9   5   1   27.80    2.80
  -9   5  -1   19.20    2.90
   9   5   1   31.70    2.80
  10  -5   1  146.39    6.80
 -10  -5  -1  142.19    6.50
  10   5   1  149.79    6.80
 -10   5  -1  137.99    6.50
 -11  -5  -1    2.10    2.70
 -11   5  -1    1.00    2.60
 -12  -5  -1   67.69    4.90
 -12   5  -1   72.29    5.10
 -13  -5  -1   -3.40    3.10
 -13   5  -1   -1.00    3.20
 -14  -5  -1   20.00    4.00
 -14   5  -1   19.00    4.00
 -14   6   1   16.80    3.80
 -13   6   1   15.00    3.60
  13   6  -1   10.50    2.80
 -12  -6   1   16.30    3.30
 -12   6   1   17.80    3.40
  12   6  -1   17.90    3.10
  11  -6  -1   12.00    2.40
 -11  -6   1    4.70    2.60
  11  -6  -1   10.30    2.50
 -11   6   1   31.10    4.80
  11   6  -1    9.20    2.30
 -11   6   1   10.20    2.70
  11   6  -1    8.50    2.20
  10  -6  -1   32.20    2.90
 -10  -6   1   34.70    3.30
  10  -6  -1   34.00    3.00
  10   6  -1   25.00    3.60
  10   6  -1   30.90    2.90
  10   6  -1   32.70    2.90
 -10   6   1   33.20    3.40
 -10   6   1   31.50    3.80
   9  -6  -1    0.70    1.50
   9  -6  -1    1.50    1.60
  -9  -6   1    2.40    1.90
   9   6  -1    1.90    2.00
   9   6  -1    0.50    1.60
   9   6  -1    1.30    1.50
  -9   6   1    3.70    2.10
  -9   6   1    1.60    2.40
   8  -6  -1    0.30    1.40
  -8  -6   1   -0.60    2.10
  -8  -6   1   -0.30    1.60
   8  -6  -1   -1.70    1.30
   8   6  -1    0.50    1.40
  -8   6   1   -2.90    1.60
   8   6  -1    0.40    1.30
  -8   6   1    2.10    2.10
   8   6  -1    0.90    1.80
   8   6  -1   -0.30    1.50
   7  -6  -1    7.10    1.50
  -7  -6   1    4.20    1.50
   7  -6  -1    5.10    1.40
   7  -6  -1    6.50    1.60
  -7  -6   1    8.90    2.00
  -7  -6   1    7.90    1.80
  -7   6   1    6.70    1.90
   7   6  -1    5.10    1.60
   7   6  -1    4.70    1.20
  -7   6   1    7.70    2.10
   7   6  -1    8.60    1.50
  -7   6   1    5.10    1.60
   7   6  -1    6.30    1.80
  -6  -6   1    0.30    1.30
  -6  -6   1    1.20    1.10
   6  -6  -1   -0.10    1.10
  -6  -6   1   -1.50    1.40
   6  -6  -1   -0.70    1.00
   6  -6  -1    0.40    1.10
   6   6  -1   -0.50    1.30
   6   6  -1    0.20    1.00
  -6   6   1    1.20    1.60
   6   6  -1    0.30    1.20
   6   6  -1   -0.60    1.00
  -6   6   1   -2.20    1.30
  -6   6   1   -0.60    1.20
   5  -6  -1   74.09    3.10
   5  -6  -1   69.79    3.20
  -5  -6   1   73.49    3.60
  -5  -6   1   69.29    3.10
   5  -6  -1   70.49    3.40
  -5   6   1   70.19    3.10
   5   6  -1   68.69    4.00
   5   6  -1   72.69    3.20
  -5   6   1   71.39    3.60
   5   6  -1   71.49    3.30
  -5   6   1   73.69    3.40
   5   6  -1   71.69    3.00
   4  -6  -1   -1.00    0.80
   4  -6  -1    0.30    0.80
   4  -6  -1    0.00    0.90
  -4  -6   1   -0.60    0.80
  -4  -6   1    2.20    1.00
  -4   6   1    0.60    0.90
   4   6  -1   -0.60    0.90
  -4   6   1    0.70    1.00
   4   6  -1   -0.30    0.70
   4   6  -1   -0.50    0.70
   4   6  -1   -0.10    0.90
   4   6  -1   -1.10    0.80
  -4   6   1   -0.50    1.10
  -3  -6   1 1413.86   53.89
   3  -6  -1 1450.65   53.89
   3  -6  -1 1453.95   44.70
   3   6  -1 1440.86   44.70
   3   6  -1 1383.26   61.99
   3   6  -1 1374.96   53.79
  -3   6   1 1488.05   44.70
   3   6  -1 1521.15   45.50
  -3   6   1 1396.66   53.89
  -2  -6   1    0.40    0.50
   2  -6  -1    0.10    0.50
   2  -6  -1    0.20    0.60
  -2   6   1   -0.10    0.60
   2   6  -1    0.30    0.40
   2   6  -1   -0.50    0.60
  -2   6   1    0.40    0.70
   2   6  -1    0.50    0.50
   2   6  -1    0.80    0.60
  -1  -6   1 2201.68   84.99
  -1  -6   1 2329.17   84.99
   1  -6  -1 2184.38   85.09
   1   6  -1 2273.27   97.79
   1   6  -1 2202.08   84.89
   1   6  -1 2486.05   70.39
  -1   6   1 2262.07   85.09
   0  -6   1    1.20    0.30
   0  -6  -1    1.40    0.40
   0   6   1    2.00    0.60
   0   6   1    1.80    0.40
   1  -6   1  482.95   18.80
  -1  -6  -1  475.75   18.90
  -1  -6  -1  535.55   15.80
   1   6   1  500.85   18.90
   1   6   1  500.95   21.80
  -1   6  -1  509.25   15.70
  -2  -6  -1   13.60    1.10
   2   6   1   11.20    1.30
  -2   6  -1   10.50    1.30
   2   6   1   11.00    0.90
   2   6   1   13.80    1.10
  -2   6  -1   11.60    1.10
  -3  -6  -1 1586.24   51.39
  -3  -6  -1 1663.23   50.49
   3  -6   1 1571.74   61.09
  -3   6  -1 1692.23   51.49
  -3   6  -1 1656.13   60.89
   3   6   1 1643.44   50.59
   3   6   1 1596.44   70.09
  -3   6  -1 1613.84   50.49
   3   6   1 1587.94   60.79
  -4  -6  -1   45.80    2.30
  -4  -6  -1   46.80    2.50
   4  -6   1   41.90    2.10
   4   6   1   41.00    2.90
  -4   6  -1   39.70    2.20
  -4   6  -1   42.60    2.50
   4   6   1   51.69    2.30
   4   6   1   38.40    2.20
  -4   6  -1   45.50    2.60
  -5  -6  -1  583.24   19.10
   5  -6   1  563.54   22.20
  -5  -6  -1  584.54   18.60
   5  -6   1  597.24   18.50
  -5   6  -1  575.74   22.20
   5   6   1  554.24   25.60
  -5   6  -1  590.64   19.10
   5   6   1  584.44   18.90
   5   6   1  566.44   22.00
   5   6   1  575.14   18.60
  -5   6  -1  563.24   18.50
   6  -6   1   51.69    2.80
  -6  -6  -1   53.99    2.90
  -6  -6  -1   52.09    3.20
   6  -6   1   44.70    3.00
   6   6   1   49.50    2.80
   6   6   1   51.49    2.80
  -6   6  -1   47.70    3.50
  -6   6  -1   45.60    2.90
  -6   6  -1   48.70    3.20
   6   6   1   56.39    3.80
   6   6   1   53.39    2.80
  -7  -6  -1  411.86   13.70
   7  -6   1  411.26   13.60
  -7  -6  -1  395.36   14.20
   7  -6   1  398.76   16.10
   7   6   1  402.96   16.00
  -7   6  -1  410.56   13.80
  -7   6  -1  410.56   14.30
   7   6   1  418.16   18.80
   7   6   1  407.46   13.70
   8  -6   1   79.99    4.30
  -8  -6  -1   87.09    4.60
  -8  -6  -1   77.39    4.20
  -8   6  -1   76.89    4.30
   8   6   1   80.89    4.00
   8   6   1   78.19    4.20
   8   6   1   82.19    5.30
  -8   6  -1   85.19    4.90
  -9  -6  -1  232.68    8.90
   9  -6   1  233.08   10.00
   9   6   1  231.68    9.90
   9   6   1  240.58    8.90
  -9   6  -1  240.78    9.00
  10  -6   1   93.39    5.00
 -10  -6  -1   88.89    4.90
 -10   6  -1   83.99    5.00
  10   6   1   89.19    4.90
 -11  -6  -1   30.80    3.80
 -11   6  -1   30.80    3.80
 -12  -6  -1   93.39    5.50
 -12   6  -1   90.19    5.50
 -13  -6  -1    4.50    3.30
 -13   6  -1    4.40    3.30
 -14   7   1    2.60    3.50
 -13   7   1   15.10    3.60
  13   7  -1   10.00    2.70
 -12  -7   1    0.40    2.70
  12   7  -1    3.00    2.20
 -12   7   1    0.10    2.70
  11  -7  -1   16.90    2.80
 -11  -7   1   14.70    3.00
  11   7  -1   10.90    2.30
 -11   7   1   22.20    4.60
  11   7  -1   16.40    2.70
 -11   7   1   13.80    3.00
  10  -7  -1   21.00    2.70
 -10  -7   1   17.70    3.00
  10  -7  -1   18.30    2.60
  10   7  -1   20.50    2.60
  10   7  -1   16.30    3.40
  10   7  -1   18.60    2.70
 -10   7   1   17.80    3.00
 -10   7   1   19.80    3.60
  -9  -7   1    5.20    2.00
   9  -7  -1    3.90    1.70
   9  -7  -1    9.20    1.80
  -9   7   1    2.40    2.50
  -9   7   1    3.50    2.10
   9   7  -1    3.90    1.60
   9   7  -1    4.60    1.80
   9   7  -1    7.30    2.30
   8  -7  -1   -1.80    1.30
  -8  -7   1    1.90    1.60
  -8  -7   1    0.70    2.40
   8  -7  -1   -0.50    1.40
  -8   7   1    0.70    1.70
   8   7  -1    0.30    1.30
   8   7  -1    1.00    1.40
   8   7  -1    0.90    1.80
   8   7  -1   -0.60    1.50
  -8   7   1    2.20    2.10
   7  -7  -1    0.50    1.40
  -7  -7   1    1.40    1.80
   7  -7  -1   -1.20    1.20
  -7  -7   1   -0.50    1.40
  -7  -7   1   -1.30    1.70
   7  -7  -1   -0.90    1.10
  -7   7   1    1.30    1.80
  -7   7   1    1.60    1.60
   7   7  -1   -1.00    1.50
   7   7  -1    0.20    1.10
   7   7  -1    0.60    1.20
   7   7  -1   -0.50    1.30
  -7   7   1   -1.40    1.70
  -6  -7   1   11.10    2.00
   6  -7  -1   14.80    1.80
   6  -7  -1   11.90    1.80
  -6  -7   1   15.70    2.00
   6  -7  -1   15.10    1.70
  -6  -7   1   12.50    1.80
  -6   7   1   16.00    2.20
  -6   7   1   15.50    2.00
   6   7  -1   13.10    1.70
   6   7  -1   16.00    1.80
   6   7  -1   14.80    2.20
  -6   7   1   13.30    1.70
   6   7  -1   12.60    1.60
  -5  -7   1   28.60    2.00
  -5  -7   1   29.40    2.20
   5  -7  -1   28.40    2.10
   5  -7  -1   28.70    1.80
   5  -7  -1   28.10    2.00
  -5   7   1   25.50    2.20
  -5   7   1   31.20    2.30
   5   7  -1   30.80    1.90
   5   7  -1   28.60    1.90
   5   7  -1   27.60    2.00
  -5   7   1   27.40    2.00
   5   7  -1   27.00    2.40
  -4  -7   1    3.60    1.10
   4  -7  -1    1.90    0.80
   4  -7  -1    1.50    0.90
  -4  -7   1    1.00    0.90
   4  -7  -1    2.00    0.90
   4   7  -1    2.00    0.90
  -4   7   1    0.90    1.10
  -4   7   1    1.90    1.00
   4   7  -1    2.00    0.80
   4   7  -1    1.70    0.90
  -4   7   1    3.00    1.20
   4   7  -1    2.50    1.10
   4   7  -1    1.80    0.70
   3  -7  -1   74.59    2.80
   3  -7  -1   71.89    3.30
  -3  -7   1   73.19    3.20
   3   7  -1   68.39    3.00
  -3   7   1   67.59    2.80
  -3   7   1   73.89    3.30
   3   7  -1   71.59    2.90
   3   7  -1   68.89    3.70
   3   7  -1   68.19    2.70
   2  -7  -1    5.20    0.80
   2  -7  -1    4.60    1.00
  -2  -7   1    6.70    0.80
   2   7  -1    6.20    0.90
  -2   7   1    7.10    1.00
   2   7  -1    4.60    1.10
   2   7  -1    5.40    0.80
   2   7  -1    4.50    0.70
  -2   7   1    6.00    1.10
   2   7  -1    6.60    0.90
  -1  -7   1   29.00    1.40
   1  -7  -1   28.00    1.50
   1  -7  -1   30.30    1.40
  -1  -7   1   30.00    1.40
   1   7  -1   30.90    1.30
   1   7  -1   30.20    1.80
   1   7  -1   31.60    1.30
   1   7  -1   30.60    1.30
  -1   7   1   31.90    1.60
   0  -7  -1   14.30    0.90
   0  -7   1   11.80    0.70
   0  -7  -1   13.30    0.80
   0   7   1   13.20    0.90
   0   7   1   12.90    1.20
  -1  -7  -1   38.90    1.60
   1  -7   1   36.90    1.60
  -1  -7  -1   33.70    1.70
   1   7   1   38.10    2.10
  -1   7  -1   39.00    1.70
   1   7   1   37.60    1.70
  -2  -7  -1   62.09    2.50
  -2   7  -1   72.09    2.70
   2   7   1   60.99    2.50
  -2   7  -1   57.19    2.60
  -2   7  -1   60.99    2.50
   2   7   1   60.09    3.30
   2   7   1   61.19    2.70
  -3  -7  -1  137.79    4.90
  -3  -7  -1  128.79    5.10
   3   7   1  141.79    5.00
   3   7   1  137.39    6.60
  -3   7  -1  133.49    4.90
   3   7   1  143.09    5.70
  -3   7  -1  133.79    5.10
  -3   7  -1  157.48    5.70
   4  -7   1  104.99    4.80
  -4  -7  -1  105.19    4.30
  -4  -7  -1  103.39    4.10
   4  -7   1  110.09    4.00
   4   7   1  103.89    4.50
  -4   7  -1  110.49    4.70
   4   7   1  116.39    4.10
  -4   7  -1  102.89    4.30
   4   7   1  104.79    5.40
  -4   7  -1   99.79    4.00
  -5  -7  -1  112.29    4.70
  -5  -7  -1  108.39    4.40
   5  -7   1  110.59    5.10
   5  -7   1  109.49    4.30
   5   7   1  113.09    4.80
   5   7   1  110.19    4.50
   5   7   1  108.79    4.30
  -5   7  -1  110.79    4.70
  -5   7  -1  109.49    4.40
   5   7   1  108.29    5.80
  -5   7  -1  115.19    5.10
  -6  -7  -1   77.59    3.50
   6  -7   1   70.89    3.40
  -6  -7  -1   74.69    3.80
   6  -7   1   69.29    3.90
   6   7   1   73.69    3.70
  -6   7  -1   76.19    3.90
  -6   7  -1   74.69    3.60
  -6   7  -1   81.49    4.20
   6   7   1   78.09    4.60
   6   7   1   82.09    3.70
   6   7   1   79.69    3.50
  -7  -7  -1  180.48    7.20
   7  -7   1  203.58    8.40
   7  -7   1  202.18    7.30
  -7  -7  -1  197.58    7.80
  -7   7  -1  195.78    7.80
   7   7   1  189.48    7.30
   7   7   1  201.08    9.80
   7   7   1  198.68    8.20
  -7   7  -1  194.78    7.40
  -8  -7  -1   41.00    3.10
   8  -7   1   41.70    3.00
   8   7   1   41.90    2.90
  -8   7  -1   38.90    3.60
   8   7   1   43.10    3.80
   8   7   1   47.40    3.00
  -8   7  -1   40.80    3.20
  -9  -7  -1  145.29    6.40
   9  -7   1  149.99    6.90
   9   7   1  147.69    6.20
   9   7   1  155.78    6.90
  -9   7  -1  144.39    6.40
  10  -7   1   39.30    3.30
 -10  -7  -1   33.30    3.60
 -10   7  -1   34.90    3.60
  10   7   1   36.30    3.20
 -11  -7  -1   55.59    4.40
 -11   7  -1   60.29    4.50
 -12  -7  -1   51.39    4.50
 -12   7  -1   42.80    4.40
 -13  -7  -1   29.30    4.20
 -13   7  -1   16.70    3.70
 -14   8   1   -1.00    3.40
 -13   8   1   24.10    4.10
  13   8  -1   22.90    3.50
  12   8  -1   -2.10    2.10
 -12   8   1   -0.60    2.80
 -11  -8   1   16.10    3.00
  11  -8  -1   18.10    2.90
  11   8  -1   17.30    2.80
  11   8  -1   16.30    2.60
 -11   8   1   33.10    4.80
 -11   8   1   15.20    3.10
 -10  -8   1    6.30    2.40
  10  -8  -1    7.60    2.00
  10  -8  -1    8.30    2.10
  10   8  -1    5.70    2.00
 -10   8   1    2.20    2.70
  10   8  -1    6.40    2.00
  10   8  -1    8.20    2.60
 -10   8   1    7.40    2.50
   9  -8  -1   -1.80    1.50
  -9  -8   1   -2.10    1.80
   9  -8  -1   -0.10    1.60
  -9   8   1   -1.00    2.00
   9   8  -1   -0.20    1.50
   9   8  -1    0.70    2.00
  -9   8   1   -4.00    2.30
   9   8  -1   -1.80    1.40
   8  -8  -1   16.60    2.20
  -8  -8   1   21.10    2.50
   8  -8  -1   13.10    2.20
  -8   8   1   15.10    2.80
   8   8  -1   22.00    2.40
   8   8  -1   23.10    2.90
   8   8  -1   21.20    2.10
   8   8  -1   20.20    2.30
  -8   8   1   16.40    2.60
  -7  -8   1    0.00    1.40
   7  -8  -1   -1.10    1.20
   7  -8  -1    0.80    1.40
  -7  -8   1   -1.20    1.80
   7  -8  -1   -0.90    1.20
  -7   8   1   -2.60    1.80
   7   8  -1    0.30    1.30
  -7   8   1   -0.90    1.50
   7   8  -1   -0.50    1.10
  -7   8   1    0.30    1.70
   7   8  -1    0.00    1.60
   7   8  -1   -0.80    1.20
   6  -8  -1  214.58    7.40
  -6  -8   1  211.08    7.70
  -6  -8   1  200.88    8.70
   6  -8  -1  202.08    7.50
   6  -8  -1  201.68    8.50
  -6  -8   1  220.78    7.50
   6   8  -1  202.98    8.40
   6   8  -1  214.88    7.60
   6   8  -1  207.48    7.30
  -6   8   1  204.28    7.70
  -6   8   1  206.98    8.70
  -6   8   1  205.18    7.40
   6   8  -1  195.88    9.90
   5  -8  -1   17.50    1.70
   5  -8  -1   14.30    1.90
   5  -8  -1   15.90    1.60
  -5  -8   1   14.90    1.90
  -5  -8   1   15.60    1.60
  -5   8   1   16.60    1.90
  -5   8   1   13.50    2.00
  -5   8   1   15.20    1.70
   5   8  -1   14.40    2.00
   5   8  -1   14.10    1.50
   5   8  -1   13.80    1.70
   5   8  -1   16.70    1.70
   5   8  -1   11.50    1.60
   4  -8  -1   12.60    1.40
  -4  -8   1   11.70    1.30
   4  -8  -1   13.60    1.50
  -4  -8   1   15.20    1.50
   4  -8  -1   13.00    1.30
  -4   8   1   15.00    1.70
  -4   8   1   14.50    1.50
   4   8  -1   15.60    1.70
  -4   8   1   11.50    1.70
   4   8  -1   14.80    1.30
   4   8  -1   13.10    1.40
   4   8  -1   13.40    1.30
   3  -8  -1   12.10    1.20
  -3  -8   1   10.20    1.20
  -3  -8   1   12.20    1.30
   3  -8  -1    7.90    1.30
   3   8  -1   13.30    1.20
  -3   8   1   14.50    1.50
   3   8  -1   11.10    1.60
   3   8  -1   10.00    1.10
  -3   8   1   10.80    1.30
   3   8  -1   14.90    1.30
  -2  -8   1   14.00    1.10
   2  -8  -1   10.30    1.30
   2  -8  -1   13.90    1.20
   2   8  -1   13.90    1.00
  -2   8   1   15.40    1.40
  -2   8   1   13.50    1.20
   2   8  -1   10.60    1.00
   2   8  -1   13.00    1.40
   2   8  -1   12.10    1.10
   2   8  -1   13.70    1.20
   1  -8  -1    4.20    0.70
  -1  -8   1    2.80    0.60
  -1  -8   1    0.80    0.60
   1   8  -1    3.40    0.60
   1   8  -1    2.60    0.60
   1   8  -1    2.70    0.80
  -1   8   1    2.90    0.80
   1   8  -1    2.60    0.60
  -1   8   1    3.10    0.70
   0  -8  -1  822.82   24.90
   0  -8  -1  789.82   29.90
   0  -8   1  789.12   29.80
   0   8   1  779.02   34.50
   0   8   1  788.32   29.90
  -1  -8  -1    7.40    0.90
  -1   8  -1    7.50    1.00
   1   8   1    6.30    1.10
   1   8   1    5.70    0.80
  -1   8  -1    6.30    1.00
  -1   8  -1    4.70    0.70
  -2  -8  -1    2.60    0.80
   2   8   1    3.30    0.80
  -2   8  -1    1.90    1.00
  -2   8  -1    2.20    0.90
   2   8   1    4.90    1.30
   2   8   1    4.00    0.90
  -3  -8  -1   42.00    2.10
  -3  -8  -1   44.50    2.30
   3   8   1   45.20    2.10
  -3   8  -1   38.60    2.10
  -3   8  -1   41.60    2.20
   3   8   1   35.90    2.10
   3   8   1   38.40    2.60
  -3   8  -1   37.20    2.30
   4  -8   1   48.80    2.90
  -4  -8  -1   49.99    2.50
  -4  -8  -1   51.19    2.70
   4  -8   1   47.60    2.40
   4   8   1   51.99    2.50
  -4   8  -1   53.69    2.70
   4   8   1   49.30    2.50
   4   8   1   47.50    2.50
   4   8   1   51.39    2.50
  -4   8  -1   49.80    2.80
  -4   8  -1   48.10    2.40
   4   8   1   44.00    3.10
  -5  -8  -1   34.90    2.30
   5  -8   1   39.10    2.30
   5  -8   1   31.80    2.60
  -5  -8  -1   44.90    2.70
   5   8   1   41.30    2.30
  -5   8  -1   34.70    2.70
   5   8   1   41.30    2.50
  -5   8  -1   42.10    2.80
  -5   8  -1   37.90    2.40
   5   8   1   37.70    2.40
   5   8   1   36.60    2.90
  -6  -8  -1   20.80    2.10
   6  -8   1   15.20    2.10
   6  -8   1   16.80    1.90
  -6  -8  -1   21.20    2.30
  -6   8  -1   17.10    2.00
   6   8   1   22.50    2.50
  -6   8  -1   20.20    2.50
   6   8   1   18.60    2.00
   6   8   1   21.20    2.00
  -6   8  -1   21.70    2.50
   6   8   1   19.90    1.90
  -7  -8  -1  101.69    4.60
   7  -8   1   96.19    5.00
   7  -8   1  106.89    4.40
  -7  -8  -1  101.69    4.90
  -7   8  -1   98.09    5.80
  -7   8  -1  107.09    5.10
   7   8   1  104.09    5.90
   7   8   1  101.59    4.80
   7   8   1  101.89    4.50
  -7   8  -1   97.99    4.60
   8  -8   1    3.70    1.70
  -8  -8  -1    2.80    1.90
   8   8   1    9.10    2.40
   8   8   1    5.30    1.60
   8   8   1    5.50    1.70
  -8   8  -1    3.60    1.90
  -8   8  -1    4.90    2.50
   9  -8   1  141.79    6.70
  -9  -8  -1  147.39    6.30
   9   8   1  144.79    6.10
  -9   8  -1  139.19    6.80
   9   8   1  140.49    6.60
  -9   8  -1  143.59    6.30
 -10  -8  -1   -1.00    2.30
  10  -8   1    2.80    2.10
  10   8   1    2.80    1.90
 -10   8  -1   -2.80    2.40
 -11  -8  -1  109.89    5.90
 -11   8  -1  125.29    6.00
 -12  -8  -1   13.60    3.30
 -12   8  -1   13.70    3.30
 -13  -8  -1   68.29    5.20
 -13   8  -1   59.69    5.10
 -14   9   1    3.50    3.60
  13   9  -1    0.90    2.40
 -13   9   1   -1.00    3.00
 -12   9   1    0.50    2.90
  12   9  -1    2.80    2.30
  11  -9  -1    8.20    2.40
 -11  -9   1    2.40    2.50
  11   9  -1    3.60    2.10
 -11   9   1   13.60    3.90
 -11   9   1    5.60    2.60
  11   9  -1    5.70    2.10
  10  -9  -1    4.80    1.90
  10  -9  -1    6.10    2.20
 -10  -9   1    2.10    2.20
  10   9  -1    2.10    1.90
 -10   9   1    0.00    2.80
  10   9  -1    3.20    1.90
 -10   9   1    4.20    2.40
  10   9  -1    3.30    2.50
   9  -9  -1    0.10    1.70
   9  -9  -1   -0.40    1.50
  -9  -9   1    1.40    1.90
   9   9  -1    0.40    1.50
   9   9  -1    0.10    2.00
  -9   9   1   -4.20    2.40
  -9   9   1   -0.30    2.00
   9   9  -1   -0.80    1.60
   8  -9  -1   -0.80    1.40
   8  -9  -1    0.00    1.40
  -8  -9   1    0.60    1.60
  -8   9   1   -2.00    1.90
   8   9  -1    0.80    1.30
   8   9  -1    0.00    1.30
   8   9  -1    2.10    1.60
   8   9  -1    0.90    1.80
  -8   9   1   -2.20    1.70
  -7  -9   1   26.00    2.40
   7  -9  -1   24.40    2.30
  -7  -9   1   27.10    3.20
   7  -9  -1   31.00    2.30
   7  -9  -1   26.30    2.40
  -7   9   1   31.10    2.60
  -7   9   1   29.20    2.70
  -7   9   1   23.80    2.80
   7   9  -1   25.20    2.90
   7   9  -1   27.70    2.30
   7   9  -1   26.80    2.20
   7   9  -1   24.30    2.30
   6  -9  -1   11.20    1.80
   6  -9  -1   13.50    1.70
  -6  -9   1   11.60    2.00
  -6  -9   1   10.90    2.20
   6  -9  -1   14.60    1.90
  -6  -9   1   13.40    1.90
   6   9  -1   14.60    1.70
   6   9  -1   13.10    1.60
   6   9  -1   11.30    1.70
  -6   9   1   16.20    2.30
   6   9  -1   12.50    2.20
  -6   9   1   11.10    1.90
  -6   9   1   13.50    2.20
   5  -9  -1   72.19    3.10
   5  -9  -1   66.99    3.20
   5  -9  -1   74.39    3.80
  -5  -9   1   74.79    3.20
  -5  -9   1   74.09    3.90
   5   9  -1   66.49    3.10
   5   9  -1   72.99    4.10
  -5   9   1   69.69    3.50
   5   9  -1   70.19    3.40
  -5   9   1   68.99    3.20
   5   9  -1   77.49    3.30
   5   9  -1   67.69    3.30
  -5   9   1   69.39    3.70
   4  -9  -1   10.00    1.50
   4  -9  -1    9.20    1.30
  -4  -9   1    9.10    1.50
   4  -9  -1   10.00    1.30
  -4  -9   1    9.90    1.30
   4   9  -1    9.30    1.70
   4   9  -1   10.90    1.20
   4   9  -1    9.90    1.40
  -4   9   1    9.50    1.60
  -4   9   1    8.80    1.60
   4   9  -1    9.60    1.20
  -4   9   1   11.10    1.50
  -3  -9   1   67.69    2.90
  -3  -9   1   70.89    3.30
   3  -9  -1   73.39    3.50
   3  -9  -1   71.59    2.90
  -3   9   1   72.09    3.00
   3   9  -1   74.69    3.90
  -3   9   1   77.09    3.40
   3   9  -1   71.39    3.10
   3   9  -1   73.59    3.10
   3   9  -1   74.79    2.90
  -3   9   1   71.79    3.20
  -2  -9   1    7.40    1.10
   2  -9  -1    8.00    1.20
   2  -9  -1   10.70    1.10
  -2   9   1    7.80    1.30
   2   9  -1    9.30    1.00
  -2   9   1    8.40    1.20
   2   9  -1    8.90    1.10
   2   9  -1    8.20    1.30
   2   9  -1    7.50    0.90
   2   9  -1    7.60    1.10
   1  -9  -1   16.20    1.20
   1   9  -1   13.40    1.10
  -1   9   1   15.50    1.20
   1   9  -1   14.20    1.50
   1   9  -1   14.70    1.00
   1   9  -1   14.50    1.20
  -1   9   1   13.90    1.20
   1   9  -1   15.70    1.10
   0  -9  -1    3.10    0.70
   0   9  -1    2.70    0.60
   0   9  -1    1.60    0.80
   0   9   1    1.60    0.60
   0   9  -1    2.60    0.50
   0   9   1    3.70    1.00
  -1  -9  -1   32.70    1.60
   1   9   1   30.60    2.10
  -1   9  -1   29.00    1.80
   1   9   1   29.20    1.60
  -1   9  -1   32.10    1.50
  -2  -9  -1    9.10    1.10
  -2   9  -1   12.40    1.10
  -2   9  -1    9.80    1.30
   2   9   1    9.80    1.20
  -2   9  -1    8.50    1.20
   2   9   1    8.10    1.40
   2   9   1    9.60    1.00
  -3  -9  -1  180.88    6.70
  -3  -9  -1  187.38    6.50
  -3   9  -1  204.18    7.50
  -3   9  -1  175.08    6.40
   3   9   1  181.38    8.80
   3   9   1  192.78    6.50
  -3   9  -1  189.48    6.80
   3   9   1  190.58    7.50
  -4  -9  -1   20.70    1.90
  -4  -9  -1   22.30    1.80
   4  -9   1   21.30    2.00
   4  -9   1   25.20    1.70
  -4   9  -1   21.90    1.80
   4   9   1   22.00    1.70
   4   9   1   24.80    1.80
  -4   9  -1   25.50    2.00
   4   9   1   20.90    1.80
   4   9   1   25.70    1.80
   4   9   1   20.40    2.10
  -4   9  -1   27.40    2.00
  -5  -9  -1  154.08    5.70
   5  -9   1  151.78    5.70
   5  -9   1  156.68    6.80
  -5  -9  -1  154.08    6.10
   5   9   1  158.28    6.50
   5   9   1  159.48    5.70
  -5   9  -1  166.48    6.70
  -5   9  -1  152.18    6.10
   5   9   1  150.68    5.90
  -5   9  -1  143.79    5.70
   5   9   1  149.69    7.70
  -6  -9  -1   27.30    2.60
   6  -9   1   37.70    2.40
  -6  -9  -1   34.00    2.50
   6  -9   1   33.20    2.60
  -6   9  -1   33.50    2.50
  -6   9  -1   36.20    2.80
   6   9   1   34.40    2.50
   6   9   1   34.60    2.30
  -6   9  -1   29.60    2.70
   6   9   1   36.20    2.40
   6   9   1   36.80    3.10
   7  -9   1  205.18    7.40
  -7  -9  -1  185.48    7.40
   7  -9   1  197.78    8.50
  -7  -9  -1  198.98    7.90
  -7   9  -1  189.68    7.40
  -7   9  -1  223.28    9.10
   7   9   1  200.98    9.90
  -7   9  -1  189.08    7.90
   7   9   1  197.78    8.30
   7   9   1  190.78    7.40
  -8  -9  -1   46.70    3.30
   8  -9   1   44.70    3.30
   8   9   1   47.30    4.00
  -8   9  -1   47.20    3.80
   8   9   1   46.20    3.10
   8   9   1   47.20    3.10
  -8   9  -1   40.70    3.30
   9  -9   1  170.58    7.60
  -9  -9  -1  161.58    6.90
  -9   9  -1  156.78    6.90
   9   9   1  169.78    7.40
   9   9   1  166.18    6.80
 -10  -9  -1   23.80    3.40
  10  -9   1   29.90    3.10
 -10   9  -1   21.90    3.30
  10   9   1   28.20    3.00
 -11  -9  -1  119.69    6.10
 -11   9  -1  113.19    6.00
 -12  -9  -1    2.60    3.00
 -12   9  -1   -1.90    2.90
 -13  -9  -1   39.20    4.60
 -13   9  -1   38.40    4.50
 -14  10   1    1.00    3.30
 -13  10   1    2.30    3.20
  13  10  -1    2.50    2.50
 -12  10   1    6.50    3.00
  12  10  -1    1.30    2.10
  11 -10  -1   11.20    2.60
 -11  10   1    9.20    2.80
 -11  10   1   16.70    4.00
  11  10  -1    8.40    2.40
  11  10  -1   11.00    2.30
 -10 -10   1    0.40    2.20
  10 -10  -1    6.30    2.30
  10 -10  -1    1.30    1.80
  10  10  -1   -0.70    1.80
  10  10  -1    0.60    1.80
 -10  10   1   -3.10    2.90
  10  10  -1   -1.10    2.30
 -10  10   1    3.70    2.40
   9 -10  -1   -0.30    1.70
   9 -10  -1    0.50    1.60
  -9 -10   1    0.20    1.90
   9  10  -1   -1.10    1.60
   9  10  -1   -1.30    2.00
   9  10  -1   -1.90    1.50
  -9  10   1   -1.10    1.90
  -9  10   1   -3.80    2.30
   8 -10  -1    6.40    1.80
   8 -10  -1    8.40    1.80
  -8 -10   1    7.10    1.90
  -8  10   1    5.80    2.20
  -8  10   1    6.70    2.00
   8  10  -1    7.00    1.60
   8  10  -1    6.90    1.70
   8  10  -1    9.30    1.90
   8  10  -1    8.60    2.20
   7 -10  -1  151.68    5.90
   7 -10  -1  151.18    6.80
  -7 -10   1  159.78    6.10
   7  10  -1  155.08    6.60
  -7  10   1  152.88    6.10
   7  10  -1  146.39    7.90
   7  10  -1  157.58    6.20
  -7  10   1  167.58    6.60
  -7  10   1  159.28    7.00
   7  10  -1  153.78    6.00
   6 -10  -1    1.60    1.10
  -6 -10   1    1.00    1.50
  -6 -10   1   -2.00    1.80
   6 -10  -1    0.60    1.20
  -6 -10   1    1.10    1.20
   6 -10  -1    0.40    1.30
   6  10  -1    1.00    1.50
   6  10  -1    0.60    1.10
  -6  10   1   -0.30    1.50
  -6  10   1    0.20    1.30
   6  10  -1    0.30    1.00
  -6  10   1    0.90    1.70
   6  10  -1   -0.10    1.30
   5 -10  -1  235.68    8.70
   5 -10  -1  257.47    8.50
  -5 -10   1  233.78   10.20
  -5 -10   1  254.67    8.60
   5 -10  -1  250.27   10.10
   5  10  -1  243.98   11.60
  -5  10   1  268.27    9.00
   5  10  -1  256.27    8.70
  -5  10   1  256.87    8.60
  -5  10   1  247.38   10.10
   5  10  -1  237.68    8.50
   5  10  -1  250.07    8.80
   5  10  -1  239.78    9.80
  -4 -10   1   12.30    1.80
  -4 -10   1   18.60    1.60
   4 -10  -1   15.60    1.80
   4 -10  -1   19.90    1.60
   4 -10  -1   17.10    1.60
  -4  10   1   19.00    1.80
   4  10  -1   17.60    1.50
   4  10  -1   16.80    1.90
   4  10  -1   18.10    1.70
  -4  10   1   20.20    2.00
  -4  10   1   18.40    1.70
   4  10  -1   16.30    1.40
   3 -10  -1  849.32   26.20
  -3 -10   1  846.52   26.10
  -3 -10   1  748.03   31.50
   3 -10  -1  863.61   31.60
  -3  10   1  857.61   26.20
   3  10  -1  831.52   36.10
  -3  10   1  804.52   31.40
   3  10  -1  781.52   31.20
   3  10  -1  831.42   26.10
   3  10  -1  852.21   26.70
  -3  10   1  852.61   26.80
   2 -10  -1    8.10    1.10
   2  10  -1    5.60    1.10
  -2  10   1    6.40    1.10
   2  10  -1    5.80    1.10
   2  10  -1    7.40    1.00
   2  10  -1    9.40    1.30
   2  10  -1    6.00    1.00
  -2  10   1    8.20    1.30
   1 -10  -1  595.74   18.60
   1  10  -1  581.94   19.00
  -1  10   1  633.74   18.70
   1  10  -1  575.04   22.10
  -1  10   1  576.14   22.30
   1  10  -1  574.94   22.10
   1  10  -1  594.24   18.60
   1  10  -1  565.94   25.60
   0 -10  -1   -0.10    0.70
   0  10   1   -0.70    0.60
   0  10   1   -0.60    0.90
   0  10  -1    0.80    0.90
   0  10  -1    0.10    0.50
   0  10  -1   -1.90    0.60
  -1 -10  -1 2354.86   70.29
  -1  10  -1 2255.87   84.59
   1  10   1 2182.88   84.69
   1  10   1 2263.47   97.59
  -1  10  -1 2270.57   71.49
  -2 -10  -1    1.10    0.80
  -2 -10  -1    2.10    1.10
   2  10   1    0.30    0.70
   2  10   1    1.20    1.00
  -2  10  -1    1.90    0.80
  -2  10  -1    2.10    1.10
  -2  10  -1    0.90    0.90
   2  10   1    0.80    0.80
  -3 -10  -1 2819.02   83.59
  -3 -10  -1 2657.93   85.09
  -3  10  -1 2650.83  100.69
  -3  10  -1 2634.74   83.49
   3  10   1 2665.43  115.99
   3  10   1 2694.83   83.59
  -3  10  -1 2733.33   85.09
   3  10   1 2680.53  100.69
  -4 -10  -1   17.30    1.70
   4 -10   1   11.90    1.80
   4 -10   1   17.50    1.50
  -4 -10  -1   15.70    1.90
   4  10   1   14.10    1.50
  -4  10  -1   12.70    1.60
  -4  10  -1   15.30    1.90
   4  10   1   16.70    1.70
   4  10   1   18.00    1.70
   4  10   1   13.50    2.00
  -4  10  -1   15.30    1.80
   5 -10   1 1422.86   43.60
  -5 -10  -1 1430.16   43.60
   5 -10   1 1366.66   52.59
  -5 -10  -1 1393.96   44.50
  -5  10  -1 1416.86   44.50
   5  10   1 1351.96   43.60
   5  10   1 1414.06   44.40
  -5  10  -1 1382.56   43.60
   5  10   1 1358.96   60.29
  -5  10  -1 1363.36   52.39
   5  10   1 1371.46   44.40
   5  10   1 1372.56   52.29
   6 -10   1   23.00    2.40
  -6 -10  -1   26.50    2.60
   6 -10   1   28.30    2.20
  -6 -10  -1   25.00    2.40
  -6  10  -1   16.20    2.40
   6  10   1   28.10    2.10
   6  10   1   28.80    2.40
  -6  10  -1   19.80    2.40
   6  10   1   28.80    2.20
  -6  10  -1   26.50    2.70
   6  10   1   28.00    2.80
   7 -10   1  521.15   17.10
  -7 -10  -1  520.65   17.20
   7 -10   1  504.45   20.40
  -7 -10  -1  513.15   17.70
   7  10   1  522.15   17.20
  -7  10  -1  520.55   20.50
  -7  10  -1  511.95   17.20
  -7  10  -1  532.35   17.80
   7  10   1  503.45   20.10
   7  10   1  527.75   23.50
   8 -10   1   59.79    3.80
  -8 -10  -1   53.39    3.60
   8  10   1   58.99    3.50
  -8  10  -1   57.99    3.80
   8  10   1   65.19    4.60
   8  10   1   59.49    3.60
  -8  10  -1   58.89    4.10
  -9 -10  -1  234.08    8.80
   9 -10   1  226.18    9.80
   9  10   1  224.58    9.60
  -9  10  -1  226.48    8.80
   9  10   1  227.38    8.70
  10 -10   1   67.89    4.40
 -10 -10  -1   75.19    4.60
 -10  10  -1   74.79    4.60
  10  10   1   72.79    4.30
 -11 -10  -1  122.19    6.20
 -11  10  -1  114.79    6.00
 -12 -10  -1   37.30    4.20
 -12  10  -1   32.00    4.10
 -13 -10  -1   32.40    4.40
 -13  10  -1   33.40    4.30
 -14  11   1    2.40    3.40
  13  11  -1    1.80    2.50
 -13  11   1    0.10    3.10
 -12  11   1   12.70    3.20
  12  11  -1   15.80    2.70
  11  11  -1    9.00    2.30
 -11  11   1   15.10    4.10
 -11  11   1   10.90    2.90
  11  11  -1    9.30    2.40
  10 -11  -1    8.00    2.30
 -10 -11   1    4.50    2.20
  10 -11  -1    5.50    2.00
  10  11  -1    2.00    2.40
 -10  11   1    3.20    2.40
 -10  11   1   -0.10    3.10
  10  11  -1    3.50    1.90
  10  11  -1    3.80    1.90
   9 -11  -1    3.50    1.90
  -9 -11   1    0.00    1.90
   9 -11  -1    0.80    1.60
   9  11  -1    0.20    1.60
  -9  11   1   -2.10    2.40
   9  11  -1    1.00    1.70
   9  11  -1    0.00    2.10
  -9  11   1   -2.10    1.90
   8 -11  -1   18.70    2.30
   8 -11  -1   18.00    2.30
  -8 -11   1   17.40    2.40
  -8  11   1   19.80    2.70
  -8  11   1   17.40    2.90
   8  11  -1   17.70    2.10
   8  11  -1   23.30    3.00
   8  11  -1   19.30    2.30
   8  11  -1   20.10    2.70
   7 -11  -1   15.00    2.10
   7 -11  -1   14.70    2.00
  -7 -11   1   10.90    1.90
   7  11  -1   16.20    2.60
   7  11  -1   15.50    2.20
   7  11  -1   15.50    1.90
   7  11  -1   14.30    2.00
  -7  11   1   11.90    2.00
  -7  11   1   12.40    2.40
  -7  11   1   13.40    2.40
  -6 -11   1    8.30    1.90
   6 -11  -1   10.70    1.70
   6 -11  -1   10.10    1.80
   6 -11  -1   10.10    1.90
  -6 -11   1    8.50    1.60
   6  11  -1    8.30    1.90
   6  11  -1   11.00    1.70
   6  11  -1   11.00    1.70
  -6  11   1    9.40    1.80
  -6  11   1    8.40    2.00
   6  11  -1   11.10    1.70
   6  11  -1    8.90    1.50
  -6  11   1   10.70    1.70
   5 -11  -1    6.00    1.20
   5 -11  -1    2.40    1.20
  -5 -11   1    2.60    1.20
   5 -11  -1    2.50    1.30
  -5 -11   1    2.00    1.40
   5  11  -1    1.30    1.40
   5  11  -1    2.00    1.00
  -5  11   1    0.50    1.50
  -5  11   1    5.00    1.50
   5  11  -1    3.10    1.10
  -5  11   1    1.60    1.20
   5  11  -1    3.70    1.30
   5  11  -1    3.00    1.30
   4 -11  -1  106.69    4.50
   4 -11  -1  120.99    5.20
  -4 -11   1  108.19    4.30
   4 -11  -1  116.39    4.40
  -4  11   1  113.99    4.70
   4  11  -1  111.59    4.80
   4  11  -1  117.79    4.60
   4  11  -1  109.29    5.80
  -4  11   1  123.39    5.10
   4  11  -1  112.19    4.30
  -4  11   1  113.79    4.50
  -3 -11   1    1.80    0.90
   3 -11  -1    1.50    0.80
   3 -11  -1    1.50    1.00
  -3  11   1    2.80    1.00
   3  11  -1    2.00    1.10
   3  11  -1    0.90    0.70
   3  11  -1    1.80    0.90
   3  11  -1    1.80    1.00
  -3  11   1    3.40    1.30
  -3  11   1    1.20    1.10
   2 -11  -1   58.29    2.60
   2  11  -1   64.49    2.90
  -2  11   1   59.69    2.70
  -2  11   1   65.49    3.00
   2  11  -1   62.79    2.80
   2  11  -1   58.29    3.40
   2  11  -1   61.49    2.70
   2  11  -1   58.79    2.50
   1 -11  -1    0.80    0.70
   1  11  -1    0.00    1.00
  -1  11   1    0.30    0.90
   1  11  -1    0.90    0.70
   1  11  -1    2.40    0.80
  -1  11   1    0.50    0.80
   1  11  -1   -0.60    0.80
   1  11  -1    0.10    0.70
   0  11  -1   11.00    1.00
  -1 -11  -1    5.30    0.90
  -1  11  -1    6.60    1.20
   1  11   1    5.00    1.00
   1  11   1    6.00    1.40
  -1  11  -1    7.40    0.90
  -2 -11  -1   10.90    1.30
  -2 -11  -1   14.70    1.60
   2  11   1   12.60    1.30
  -2  11  -1   17.20    1.30
  -2  11  -1    9.60    1.50
   2  11   1   12.60    1.70
  -2  11  -1   11.80    1.40
   2  11   1   13.90    1.50
   3 -11   1   10.20    1.30
  -3 -11  -1    9.10    1.60
  -3 -11  -1   10.70    1.40
  -3  11  -1   13.20    1.40
  -3  11  -1    9.90    1.40
   3  11   1    9.60    1.40
  -3  11  -1    9.20    1.60
   3  11   1    8.30    1.30
   3  11   1   11.90    1.80
   3  11   1    9.70    1.30
  -4 -11  -1  121.59    5.10
   4 -11   1  129.19    5.80
   4 -11   1  127.39    4.80
  -4 -11  -1  127.99    4.90
   4  11   1  128.49    5.50
  -4  11  -1  139.59    5.60
  -4  11  -1  121.89    4.90
   4  11   1  129.19    4.90
  -4  11  -1  123.79    5.10
   4  11   1  123.09    5.00
   4  11   1  126.29    6.50
  -5 -11  -1   55.29    3.00
  -5 -11  -1   56.69    3.30
   5 -11   1   62.29    2.90
   5 -11   1   60.99    3.50
  -5  11  -1   57.49    3.10
   5  11   1   61.89    3.90
  -5  11  -1   57.39    3.30
   5  11   1   60.69    3.10
  -5  11  -1   57.79    3.40
   5  11   1   61.99    3.10
   5  11   1   61.49    3.10
   5  11   1   59.99    3.00
   6 -11   1  122.49    4.90
  -6 -11  -1  121.19    5.10
   6 -11   1  130.09    5.90
  -6 -11  -1  120.99    5.40
   6  11   1  123.29    5.50
   6  11   1  123.69    6.60
  -6  11  -1  130.09    5.80
  -6  11  -1  121.19    5.40
   6  11   1  121.89    5.20
  -6  11  -1  110.19    5.00
   6  11   1  120.99    5.00
   7 -11   1   36.80    3.00
  -7 -11  -1   38.60    3.20
  -7 -11  -1   36.40    2.80
   7  11   1   41.00    3.50
   7  11   1   37.50    2.70
   7  11   1   37.90    2.70
  -7  11  -1   37.20    3.40
  -7  11  -1   32.40    2.90
  -7  11  -1   44.50    3.50
  -8 -11  -1  152.48    6.30
   8 -11   1  152.88    7.00
  -8  11  -1  137.89    6.60
   8  11   1  154.58    6.70
   8  11   1  153.88    6.20
  -8  11  -1  142.99    6.20
  -9 -11  -1   28.50    3.30
   9 -11   1   29.10    3.10
   9  11   1   35.00    3.00
   9  11   1   27.40    2.90
  -9  11  -1   29.20    3.20
 -10 -11  -1  120.79    6.10
  10 -11   1  128.19    6.40
 -10  11  -1  124.49    6.10
  10  11   1  126.99    6.20
 -11 -11  -1   26.70    3.70
 -11  11  -1   35.90    3.90
 -12 -11  -1   54.39    4.70
 -12  11  -1   49.70    4.60
 -13 -11  -1   29.60    4.30
 -13  11  -1   25.30    4.10
 -14  12   1    8.00    3.60
  14  12  -1   12.00    3.20
 -13  12   1   16.70    3.60
  13  12  -1   19.30    3.20
 -12  12   1   34.40    4.10
  12  12  -1   33.80    3.60
  11  12  -1   14.90    2.70
  11  12  -1   11.60    2.50
 -11  12   1   16.10    3.10
 -11  12   1   26.80    4.90
 -10 -12   1   51.19    3.90
  10 -12  -1   41.20    3.50
  10  12  -1   42.40    3.40
  10  12  -1   40.00    3.20
 -10  12   1   40.20    3.70
  10  12  -1   41.40    4.20
 -10  12   1   38.80    4.50
   9 -12  -1    6.50    2.10
  -9 -12   1    5.40    2.10
   9 -12  -1    6.10    1.90
   9  12  -1    4.90    1.80
  -9  12   1    3.60    2.20
  -9  12   1    1.40    2.50
   9  12  -1    6.10    1.80
   9  12  -1    6.90    2.50
  -8 -12   1   36.90    3.00
   8 -12  -1   35.60    2.90
   8 -12  -1   36.00    2.80
   8  12  -1   38.50    3.60
   8  12  -1   41.10    2.80
   8  12  -1   39.10    2.70
  -8  12   1   35.40    3.40
  -8  12   1   38.90    3.10
   7 -12  -1    5.70    1.50
  -7 -12   1    4.50    1.60
   7 -12  -1    2.00    1.60
  -7  12   1    3.40    2.10
   7  12  -1    4.90    1.50
   7  12  -1    3.30    1.90
   7  12  -1    2.20    1.30
   7  12  -1    3.40    1.60
  -7  12   1    1.80    1.60
  -7  12   1    3.20    1.90
   6 -12  -1   36.30    2.70
   6 -12  -1   36.60    2.60
   6 -12  -1   37.70    2.40
  -6 -12   1   36.10    2.50
  -6 -12   1   29.90    2.60
   6  12  -1   38.50    2.60
   6  12  -1   41.10    2.40
   6  12  -1   37.80    2.60
   6  12  -1   38.10    2.40
  -6  12   1   41.00    2.70
   6  12  -1   37.60    3.20
  -6  12   1   35.90    2.90
  -6  12   1   38.70    2.80
   5 -12  -1   21.90    2.20
   5 -12  -1   22.70    1.90
   5 -12  -1   22.70    2.00
  -5 -12   1   23.70    2.00
  -5 -12   1   24.20    2.30
   5  12  -1   22.70    1.80
  -5  12   1   23.10    2.30
  -5  12   1   25.30    2.40
   5  12  -1   22.40    2.00
   5  12  -1   20.50    2.50
   5  12  -1   22.40    1.90
  -5  12   1   21.20    1.90
  -4 -12   1  792.62   24.60
   4 -12  -1  776.22   29.70
   4 -12  -1  776.32   24.60
   4 -12  -1  756.32   25.00
  -4  12   1  783.32   25.30
   4  12  -1  782.22   25.10
  -4  12   1  783.12   29.60
   4  12  -1  762.02   34.00
   4  12  -1  782.92   24.60
  -4  12   1  777.02   24.70
   4  12  -1  738.33   29.30
   3 -12  -1    4.70    1.00
   3 -12  -1    4.40    1.30
  -3 -12   1   10.70    1.30
   3  12  -1    7.90    1.70
   3  12  -1    6.70    1.10
  -3  12   1    7.70    1.50
   3  12  -1    6.90    1.20
   3  12  -1    7.60    1.20
  -3  12   1    6.00    1.20
  -3  12   1    5.40    1.40
   2 -12  -1 1500.85   46.20
   2  12  -1 1473.35   63.99
   2  12  -1 1463.85   46.20
  -2  12   1 1534.15   46.30
  -2  12   1 1428.96   55.69
   2  12  -1 1517.55   47.10
   2  12  -1 1400.36   55.49
  -2  12   1 1526.25   47.20
   1 -12  -1    2.00    0.80
  -1  12   1    1.80    1.00
  -1  12   1    1.40    0.90
   1  12  -1    0.60    1.00
   1  12  -1    0.50    0.70
   1  12  -1    2.40    0.90
   1  12  -1    1.00    1.10
   1  12  -1    0.70    0.80
   0 -12  -1  980.40   30.20
   0  12  -1  938.21   36.10
   0  12  -1  972.00   30.90
   0  12   1  951.60   36.30
   0  12   1  971.70   41.90
  -1 -12  -1    4.90    1.00
   1  12   1    3.70    0.80
  -1  12  -1    6.60    1.20
   1  12   1    3.80    1.20
  -1  12  -1    4.50    1.00
  -2 -12  -1 4626.24  148.49
  -2 -12  -1 4840.42  145.99
  -2  12  -1 4870.81  148.49
   2  12   1 4647.53  202.78
  -2  12  -1 4679.03  176.18
   2  12   1 4674.63  176.28
   2  12   1 4726.13  146.09
   2  12   1 4740.73  148.49
  -2  12  -1 4662.23  145.99
  -3 -12  -1    2.90    1.10
  -3 -12  -1    2.10    1.30
   3 -12   1    2.30    0.90
  -3  12  -1    4.40    1.50
   3  12   1    2.10    1.00
  -3  12  -1    1.40    1.10
   3  12   1    3.50    1.20
   3  12   1    2.50    0.90
  -3  12  -1    2.40    1.10
   3  12   1    3.30    1.30
  -4 -12  -1 3873.31  116.79
   4 -12   1 3794.72  116.69
  -4 -12  -1 3696.53  118.89
   4  12   1 3706.43  162.08
  -4  12  -1 3806.52  118.89
   4  12   1 3788.72  116.89
   4  12   1 3800.82  140.89
   4  12   1 3835.22  118.79
  -4  12  -1 3653.93  116.79
  -4  12  -1 3691.23  140.79
  -5 -12  -1    7.80    1.50
  -5 -12  -1   11.70    2.00
   5 -12   1    4.40    1.60
   5 -12   1    9.80    1.40
  -5  12  -1    6.50    1.80
  -5  12  -1    9.60    1.60
   5  12   1    9.90    1.70
   5  12   1    9.60    1.60
  -5  12  -1    8.60    1.90
   5  12   1    7.40    1.80
   5  12   1    8.70    1.60
   5  12   1   10.90    1.80
  -6 -12  -1 1097.29   36.30
  -6 -12  -1 1130.19   35.60
   6 -12   1 1102.19   42.80
   6 -12   1 1162.88   35.50
   6  12   1 1121.09   35.60
  -6  12  -1 1083.59   35.50
   6  12   1 1148.19   36.20
   6  12   1 1118.49   49.10
   6  12   1 1095.69   42.40
  -6  12  -1 1137.49   36.40
  -6  12  -1 1108.09   42.50
  -7 -12  -1    4.20    2.10
  -7 -12  -1    3.40    1.70
   7 -12   1    3.70    1.80
  -7  12  -1    4.90    2.30
  -7  12  -1    2.40    1.80
  -7  12  -1    6.80    2.30
   7  12   1    3.70    1.90
   7  12   1    5.60    1.60
   7  12   1    4.80    1.50
  -8 -12  -1  522.95   17.40
   8 -12   1  518.55   20.50
  -8  12  -1  538.15   18.10
   8  12   1  506.15   20.20
  -8  12  -1  496.55   17.40
   8  12   1  519.25   17.40
   9 -12   1    1.00    2.00
  -9 -12  -1   -1.40    2.00
   9  12   1   -0.70    1.80
  -9  12  -1    2.60    2.20
   9  12   1    0.30    1.70
 -10 -12  -1  266.97   10.10
  10 -12   1  262.37   11.20
  10  12   1  265.77   11.10
 -10  12  -1  246.68   10.00
 -11 -12  -1   -2.30    2.60
 -11  12  -1    3.80    2.80
 -12 -12  -1   63.59    5.00
 -12  12  -1   73.79    5.10
 -13 -12  -1    6.10    3.50
 -13  12  -1    3.90    3.40
  14  13  -1    8.10    3.10
 -14  13   1   12.10    3.70
  13  13  -1    1.80    2.60
 -13  13   1    3.90    3.30
  12  13  -1   25.00    3.40
 -12  13   1   19.80    3.60
 -11  13   1   -0.20    2.50
  11  13  -1    5.30    2.10
 -11  13   1   11.90    3.90
  11  13  -1    5.70    2.30
  10 -13  -1   25.40    3.10
 -10  13   1   20.00    3.60
  10  13  -1   17.70    3.40
  10  13  -1   24.10    2.70
 -10  13   1   21.60    3.30
  10  13  -1   21.30    2.80
   9 -13  -1    2.90    2.00
   9 -13  -1    0.30    1.60
  -9 -13   1    0.00    1.90
  -9  13   1   -0.20    2.00
   9  13  -1   -1.60    2.10
   9  13  -1    0.50    1.60
   9  13  -1   -0.70    1.60
  -9  13   1   -2.20    2.40
   8 -13  -1   21.90    2.40
   8 -13  -1   17.40    2.60
  -8 -13   1   13.70    2.20
   8  13  -1   15.40    2.30
   8  13  -1   13.30    2.10
   8  13  -1   12.60    2.90
  -8  13   1   15.00    2.30
  -8  13   1   15.50    2.80
   7 -13  -1   14.50    2.30
   7 -13  -1   14.80    2.10
  -7 -13   1   12.20    2.10
   7  13  -1   12.60    2.10
  -7  13   1   17.50    2.50
   7  13  -1   13.10    1.90
  -7  13   1   12.30    2.40
  -7  13   1   14.50    2.10
   7  13  -1   13.10    2.60
   7  13  -1   13.10    2.10
   6 -13  -1   10.40    1.70
  -6 -13   1    7.70    1.60
   6 -13  -1   10.20    1.50
   6 -13  -1    9.90    1.80
   6  13  -1    9.90    1.70
  -6  13   1    8.60    1.70
   6  13  -1    9.00    2.00
  -6  13   1    6.60    2.00
   6  13  -1   10.10    1.70
   6  13  -1    7.50    1.50
  -6  13   1   11.90    2.20
   6  13  -1   12.10    1.90
   5 -13  -1   54.79    2.80
   5 -13  -1   53.69    3.00
  -5 -13   1   54.29    2.90
   5 -13  -1   57.59    3.40
  -5 -13   1   55.29    3.10
  -5  13   1   59.29    3.30
   5  13  -1   55.29    3.80
  -5  13   1   59.79    3.00
   5  13  -1   51.79    3.00
  -5  13   1   61.59    3.30
   5  13  -1   54.79    2.90
   5  13  -1   55.09    2.80
   4 -13  -1   27.30    2.00
   4 -13  -1   32.10    2.00
  -4 -13   1   27.70    2.00
   4 -13  -1   27.40    2.70
   4  13  -1   30.10    2.10
   4  13  -1   29.40    2.00
  -4  13   1   27.60    2.10
   4  13  -1   29.00    2.00
  -4  13   1   32.40    2.30
  -4  13   1   26.20    2.30
   4  13  -1   27.20    2.50
  -3 -13   1   46.40    2.40
   3 -13  -1   50.09    2.40
   3 -13  -1   50.39    3.00
   3 -13  -1   43.70    2.50
   3  13  -1   48.80    2.40
   3  13  -1   50.19    3.10
  -3  13   1   49.50    2.50
   3  13  -1   51.39    2.60
   3  13  -1   48.00    2.40
  -3  13   1   49.40    2.70
  -3  13   1   49.50    2.80
   2 -13  -1   20.60    1.50
  -2 -13   1   17.00    1.50
   2  13  -1   18.30    1.70
  -2  13   1   18.00    1.70
  -2  13   1   19.50    1.90
   2  13  -1   20.50    1.60
   2  13  -1   18.10    2.00
   2  13  -1   21.30    1.50
   2  13  -1   22.60    1.70
  -2  13   1   25.80    1.80
   1 -13  -1   11.80    1.40
   1  13  -1   13.50    1.30
  -1  13   1   12.80    1.60
   1  13  -1   16.50    1.90
  -1  13   1   11.20    1.50
   1  13  -1   15.90    1.40
  -1  13   1   13.00    1.70
   1  13  -1   15.70    1.50
   1  13  -1   12.70    1.20
   0 -13  -1    0.70    0.80
   0  13   1    1.80    0.90
   0  13  -1    1.50    0.70
   0  13  -1    1.10    1.10
   0  13   1    8.60    1.70
   0  13   1    2.20    1.10
  -1 -13  -1   34.80    1.90
  -1  13  -1   35.60    1.90
   1  13   1   35.90    2.60
   1  13   1   33.70    2.10
   1  13   1   32.80    1.90
  -1  13  -1   31.90    2.10
  -2 -13  -1   52.89    2.70
  -2 -13  -1   55.89    2.50
   2  13   1   53.09    2.70
   2  13   1   53.79    2.70
  -2  13  -1   53.59    2.60
  -2  13  -1   57.99    2.60
   2  13   1   52.69    3.30
   2  13   1   53.29    2.60
  -2  13  -1   48.20    2.70
   3 -13   1    6.60    1.10
  -3 -13  -1    7.60    1.50
  -3 -13  -1    6.90    1.20
   3  13   1    8.60    1.40
  -3  13  -1    5.10    1.50
  -3  13  -1    5.30    1.30
   3  13   1    8.90    1.90
   3  13   1    5.50    1.20
   3  13   1    5.70    1.30
  -4 -13  -1  193.38    7.50
   4 -13   1  195.88    7.10
  -4 -13  -1  202.98    7.20
   4  13   1  206.08    8.20
  -4  13  -1  201.78    7.60
   4  13   1  200.68    7.40
  -4  13  -1  225.68    8.40
  -4  13  -1  193.18    7.20
   4  13   1  207.48    7.30
   4  13   1  197.88    9.70
   5 -13   1    5.50    1.30
   5 -13   1    4.50    1.60
  -5 -13  -1    5.40    1.70
  -5 -13  -1    8.70    1.50
   5  13   1    6.20    1.30
   5  13   1    5.10    1.50
  -5  13  -1    5.50    1.70
  -5  13  -1    5.10    1.80
  -5  13  -1    5.20    1.50
   5  13   1    7.30    1.70
   5  13   1    4.10    1.20
   6 -13   1  151.98    6.00
  -6 -13  -1  156.18    6.10
   6 -13   1  156.08    7.10
  -6 -13  -1  159.78    6.50
   6  13   1  156.88    6.20
   6  13   1  161.28    6.10
   6  13   1  160.28    8.10
  -6  13  -1  145.89    6.10
   6  13   1  154.18    6.70
  -6  13  -1  161.18    6.90
   6  13   1  156.78    6.30
  -6  13  -1  151.18    6.50
   7 -13   1   -0.70    1.60
  -7 -13  -1    1.30    1.70
  -7  13  -1    0.10    2.10
   7  13   1   -0.60    1.30
  -7  13  -1   -1.40    2.00
   7  13   1    0.00    1.40
  -7  13  -1    0.90    1.80
   7  13   1    0.60    1.90
  -8 -13  -1  122.99    5.50
   8 -13   1  116.29    6.00
   8  13   1  119.79    5.60
  -8  13  -1  120.99    5.90
  -8  13  -1  116.49    5.50
   8  13   1  116.99    5.30
   9 -13   1    2.50    2.10
  -9 -13  -1    0.80    2.10
   9  13   1    2.10    1.90
  -9  13  -1    1.60    2.20
   9  13   1    4.90    1.90
  10 -13   1  150.68    7.20
 -10 -13  -1  137.99    6.60
  10  13   1  147.99    6.90
 -10  13  -1  140.69    6.60
 -11 -13  -1   -0.20    2.60
 -11  13  -1   -0.50    2.70
 -12 -13  -1   63.19    5.10
 -12  13  -1   67.19    4.90
 -13 -13  -1    0.50    3.20
 -13  13  -1   -1.80    3.20
  13  14  -1   10.70    2.80
 -13  14   1   14.50    3.60
  12  14  -1   49.70    4.10
 -12  14   1   44.00    4.40
  11  14  -1   37.70    3.40
 -11  14   1   36.60    3.90
  11  14  -1   35.80    3.40
  10 -14  -1   25.20    3.30
  10  14  -1   19.60    2.90
  10  14  -1   26.00    2.80
  10  14  -1   24.50    3.70
 -10  14   1   17.90    3.00
 -10  14   1   17.10    3.50
  -9 -14   1   17.60    2.80
   9 -14  -1   18.70    2.60
   9 -14  -1   22.00    2.80
   9  14  -1   20.60    2.40
   9  14  -1   22.20    3.40
  -9  14   1   17.90    3.30
  -9  14   1   18.50    2.90
   9  14  -1   24.70    2.70
   8 -14  -1    0.80    1.90
  -8 -14   1   -1.10    1.70
   8 -14  -1    0.30    1.40
   8  14  -1   -0.80    2.00
   8  14  -1   -1.30    1.50
   8  14  -1    0.80    1.50
  -8  14   1    0.00    2.10
  -8  14   1    2.70    2.00
   7 -14  -1   21.40    2.30
  -7 -14   1   20.20    2.40
   7 -14  -1   18.00    2.40
  -7  14   1   19.00    2.50
   7  14  -1   18.50    2.00
   7  14  -1   18.80    2.40
   7  14  -1   19.10    2.30
  -7  14   1   17.20    2.60
  -7  14   1   21.10    2.90
   7  14  -1   22.50    3.00
   7  14  -1   17.90    2.40
   6 -14  -1    2.00    1.40
   6 -14  -1   -0.60    1.40
   6 -14  -1    1.00    1.20
  -6 -14   1    1.10    1.30
   6  14  -1   -1.10    1.20
   6  14  -1    0.00    1.60
  -6  14   1    0.70    1.60
  -6  14   1    0.60    1.80
   6  14  -1   -0.60    1.10
  -6  14   1   -0.80    1.50
   6  14  -1    0.60    1.40
   6  14  -1    1.20    1.40
  -5 -14   1   72.09    3.40
   5 -14  -1   76.19    3.40
  -5 -14   1   72.09    3.70
   5 -14  -1   78.09    4.10
   5 -14  -1   73.59    3.50
  -5  14   1   82.19    3.90
  -5  14   1   72.99    3.90
  -5  14   1   74.09    3.50
   5  14  -1   72.99    3.60
   5  14  -1   72.09    4.50
   5  14  -1   76.39    3.60
   5  14  -1   72.79    3.40
  -4 -14   1   -0.70    1.00
   4 -14  -1    0.10    1.50
   4 -14  -1    1.90    1.10
   4 -14  -1    4.40    1.10
  -4  14   1    0.60    1.50
   4  14  -1    0.40    1.40
  -4  14   1    0.50    1.20
  -4  14   1   -0.30    1.20
   4  14  -1    1.60    0.90
   4  14  -1    2.20    1.20
   4  14  -1    2.70    1.00
   3 -14  -1  149.79    5.10
  -3 -14   1  127.49    4.80
   3  14  -1  124.39    6.60
  -3  14   1  144.89    5.30
   3  14  -1  129.69    5.10
   3  14  -1  127.39    4.90
   3  14  -1  121.59    5.40
   2 -14  -1   -0.20    0.80
  -2 -14   1    0.30    0.80
   2  14  -1    1.90    0.80
   2  14  -1    1.10    1.20
   2  14  -1    0.80    0.80
  -2  14   1   -0.60    1.00
  -2  14   1    1.10    1.20
   2  14  -1    0.30    1.00
  -2  14   1   -0.30    1.00
   1 -14  -1   35.50    2.00
  -1  14   1   44.30    2.40
   1  14  -1   38.80    2.10
   1  14  -1   45.20    2.10
  -1  14   1   39.10    2.30
   1  14  -1   34.20    2.10
   1  14  -1   41.80    2.30
   1  14  -1   39.30    2.80
   0 -14  -1    1.00    0.90
   0  14   1    1.70    1.30
   0  14   1    1.10    0.90
   0  14   1    1.80    1.20
   0  14  -1   -0.60    1.10
   0  14  -1    1.30    0.80
  -1 -14  -1  524.35   16.50
  -1 -14  -1  500.45   16.90
   1  14   1  511.55   22.80
  -1  14  -1  514.65   19.40
   1  14   1  507.25   19.60
   1  14   1  508.15   16.90
  -1  14  -1  520.25   16.90
  -2 -14  -1   15.90    1.50
   2 -14   1   12.10    1.40
  -2 -14  -1   17.80    1.70
   2  14   1   17.40    1.70
  -2  14  -1   13.70    1.50
   2  14   1   11.50    1.90
   2  14   1   11.40    1.40
  -2  14  -1   11.80    1.30
  -2  14  -1   13.00    1.70
   2  14   1   12.90    1.60
  -3 -14  -1 1132.09   34.70
   3 -14   1 1100.89   34.50
  -3 -14  -1 1088.29   35.40
   3  14   1 1068.49   47.90
   3  14   1 1079.09   34.70
   3  14   1 1108.99   41.50
  -3  14  -1 1106.59   35.40
  -3  14  -1 1073.59   41.40
   3  14   1 1114.19   35.30
  -3  14  -1 1113.59   34.70
  -4 -14  -1   57.99    3.00
  -4 -14  -1   49.90    2.70
   4 -14   1   48.30    2.50
   4  14   1   42.10    2.60
   4  14   1   50.89    2.70
  -4  14  -1   43.30    2.90
   4  14   1   43.50    3.30
  -4  14  -1   43.70    2.60
  -4  14  -1   39.10    2.70
   4  14   1   48.90    2.70
  -5 -14  -1  179.58    6.50
   5 -14   1  180.28    6.50
  -5 -14  -1  169.38    6.80
   5 -14   1  168.68    7.80
   5  14   1  172.78    7.30
  -5  14  -1  166.88    6.60
   5  14   1  173.88    8.80
   5  14   1  178.48    6.60
  -5  14  -1  183.28    7.50
   5  14   1  181.28    6.80
  -5  14  -1  183.18    7.00
  -6 -14  -1   50.19    3.00
   6 -14   1   48.80    3.50
   6 -14   1   50.89    2.90
  -6 -14  -1   55.59    3.40
  -6  14  -1   42.80    3.30
  -6  14  -1   52.69    3.20
   6  14   1   48.80    3.00
  -6  14  -1   54.69    3.60
   6  14   1   53.79    3.90
   6  14   1   56.69    3.20
   6  14   1   48.60    3.00
   7 -14   1   67.09    4.30
  -7 -14  -1   70.09    3.90
   7  14   1   74.99    4.90
  -7  14  -1   74.59    3.90
   7  14   1   73.69    3.80
  -7  14  -1   75.69    4.30
  -7  14  -1   67.89    4.20
   7  14   1   67.49    3.80
  -8 -14  -1   53.09    3.60
   8 -14   1   48.40    3.70
  -8  14  -1   55.39    4.20
   8  14   1   55.99    3.50
   8  14   1   49.10    3.30
  -8  14  -1   55.89    3.60
   9 -14   1   48.20    3.90
  -9 -14  -1   47.40    3.80
   9  14   1   49.70    3.60
   9  14   1   47.90    3.50
  -9  14  -1   50.99    3.80
  10 -14   1  102.59    5.70
 -10 -14  -1  101.09    5.40
 -10  14  -1   93.09    5.40
  10  14   1   97.79    5.30
 -11 -14  -1   16.30    3.30
 -11  14  -1   19.10    3.40
 -12 -14  -1   71.49    5.20
 -12  14  -1   73.79    5.10
 -13 -14  -1    2.20    3.30
 -13  14  -1    6.20    3.50
  13  15  -1    8.30    2.80
 -13  15   1   10.50    3.70
 -12  15   1    1.90    2.90
  12  15  -1    5.50    2.50
  11  15  -1   15.60    2.70
  11  15  -1   14.00    2.60
 -11  15   1   16.70    3.20
  10 -15  -1    4.60    2.40
 -10  15   1   -8.10    3.00
 -10  15   1    0.10    2.40
  10  15  -1    1.20    1.90
  10  15  -1    1.10    2.60
  10  15  -1   -0.30    1.80
   9 -15  -1   -1.40    1.60
   9 -15  -1    3.10    2.10
  -9 -15   1   -2.50    1.80
   9  15  -1   -1.10    1.60
  -9  15   1   -4.00    2.50
  -9  15   1    0.90    2.10
   9  15  -1    0.20    2.30
   9  15  -1    0.90    1.80
   8 -15  -1    0.20    1.90
   8 -15  -1    1.30    1.60
  -8 -15   1    1.70    1.80
   8  15  -1   -3.30    1.40
   8  15  -1   -0.60    2.00
  -8  15   1    0.60    2.10
   8  15  -1   -1.00    1.40
  -8  15   1   -0.40    1.80
   7 -15  -1   12.70    2.40
  -7 -15   1   16.70    2.40
   7 -15  -1   14.80    2.20
   7  15  -1   16.50    2.00
   7  15  -1   18.60    2.40
   7  15  -1   14.70    2.20
  -7  15   1   16.40    2.50
  -7  15   1   16.40    2.60
   7  15  -1   15.50    2.90
   7  15  -1   17.50    2.30
  -7  15   1   18.00    2.90
   6 -15  -1    6.60    1.80
  -6 -15   1    4.00    1.60
   6 -15  -1    8.50    1.50
   6  15  -1    5.80    1.30
   6  15  -1    7.00    1.70
  -6  15   1    4.80    1.80
  -6  15   1    9.20    2.20
  -6  15   1    6.60    1.80
   6  15  -1    4.50    1.40
   6  15  -1    5.50    1.90
   5 -15  -1   29.70    2.40
  -5 -15   1   34.00    2.40
   5 -15  -1   38.40    3.00
  -5 -15   1   37.60    2.60
   5 -15  -1   38.20    2.40
  -5  15   1   34.40    2.50
  -5  15   1   38.60    2.70
  -5  15   1   38.40    2.90
   5  15  -1   36.50    2.60
   5  15  -1   39.30    2.30
   5  15  -1   34.70    3.10
   5  15  -1   35.40    2.40
   4 -15  -1    2.20    1.40
  -4 -15   1    0.60    1.10
   4 -15  -1    3.60    1.10
   4 -15  -1    2.40    1.20
  -4  15   1    3.10    1.60
  -4  15   1    4.00    1.40
   4  15  -1    3.90    1.00
   4  15  -1    1.40    1.00
   4  15  -1    3.60    1.40
   4  15  -1    2.80    1.50
  -4  15   1    4.10    1.40
  -3 -15   1   12.20    1.50
   3 -15  -1   11.10    1.60
   3 -15  -1   13.60    1.60
   3  15  -1   12.30    1.50
   3  15  -1   15.20    1.50
  -3  15   1   11.00    1.90
  -3  15   1   11.90    1.70
   3  15  -1   12.50    2.00
   3  15  -1   13.90    1.70
  -3  15   1   19.80    1.90
  -2 -15   1    6.90    1.10
   2 -15  -1    7.30    1.10
   2 -15  -1    6.00    1.30
   2  15  -1    7.50    1.80
  -2  15   1    8.70    1.50
  -2  15   1    5.40    1.50
   2  15  -1    8.30    1.20
  -2  15   1    7.20    1.30
   2  15  -1    6.70    1.10
   2  15  -1    8.00    1.40
  -1 -15   1    0.60    0.80
   1 -15  -1   -0.30    0.80
   1  15  -1   -0.20    0.80
  -1  15   1   -0.10    0.90
   1  15  -1    1.10    1.30
   1  15  -1   -1.20    1.10
  -1  15   1    1.00    1.20
   1  15  -1    1.10    1.00
   1  15  -1    1.20    0.80
   0 -15  -1    8.60    1.30
   0  15   1    8.50    1.70
   0  15  -1   10.50    1.60
   0  15  -1    7.30    1.20
   0  15   1    9.30    1.60
   0  15   1    9.10    1.40
  -1 -15  -1    4.40    1.30
  -1 -15  -1    3.20    1.00
  -1  15  -1    3.80    1.30
   1  15   1    5.30    1.40
   1  15   1    3.50    1.20
   1  15   1    4.80    1.00
  -1  15  -1    3.80    0.90
  -2 -15  -1   55.89    2.90
   2 -15   1   51.69    2.50
  -2 -15  -1   57.69    2.70
   2  15   1   55.19    2.80
  -2  15  -1   55.89    3.00
   2  15   1   59.09    2.80
  -2  15  -1   49.60    2.70
   2  15   1   59.59    2.90
   2  15   1   60.59    3.60
  -2  15  -1   57.99    2.80
  -3 -15  -1   78.99    3.60
   3 -15   1   76.59    3.30
  -3 -15  -1   72.99    3.30
  -3  15  -1   71.69    3.60
   3  15   1   78.39    3.70
   3  15   1   77.69    4.50
  -3  15  -1   72.09    3.70
  -3  15  -1   74.79    3.40
   3  15   1   77.29    3.40
   3  15   1   80.29    3.60
  -4 -15  -1   94.89    4.00
  -4 -15  -1   88.89    4.20
   4 -15   1   96.39    3.80
   4  15   1   90.99    5.20
   4  15   1   91.49    3.90
  -4  15  -1   95.79    4.30
  -4  15  -1   86.39    4.30
   4  15   1   90.79    4.30
  -4  15  -1   86.39    4.00
   4  15   1   94.89    4.10
   5 -15   1   86.49    3.70
  -5 -15  -1   80.89    4.10
   5 -15   1   84.49    4.70
  -5 -15  -1   84.89    3.90
   5  15   1   83.89    4.10
  -5  15  -1   88.49    4.30
  -5  15  -1   85.29    4.30
  -5  15  -1   76.29    3.90
   5  15   1   84.69    5.00
   5  15   1   89.99    4.00
   5  15   1   86.49    4.00
  -6 -15  -1   67.49    3.90
   6 -15   1   68.99    4.20
  -6 -15  -1   68.79    3.70
   6  15   1   71.39    3.50
  -6  15  -1   64.09    3.70
  -6  15  -1   70.39    4.00
   6  15   1   67.29    3.60
  -6  15  -1   67.99    4.10
   6  15   1   70.49    4.70
   7 -15   1   59.59    4.10
  -7 -15  -1   63.29    3.70
  -7  15  -1   60.09    4.10
   7  15   1   63.29    4.60
   7  15   1   64.29    3.60
   7  15   1   62.49    3.60
  -7  15  -1   64.39    4.10
  -7  15  -1   63.69    3.80
  -8 -15  -1   70.39    4.00
   8 -15   1   65.39    4.30
  -8  15  -1   62.39    4.00
  -8  15  -1   73.59    4.80
   8  15   1   67.89    3.90
   8  15   1   67.79    3.90
   9 -15   1   72.69    4.60
  -9 -15  -1   61.09    4.30
   9  15   1   66.19    4.10
   9  15   1   69.89    4.10
  -9  15  -1   60.99    4.30
 -10 -15  -1   55.79    4.30
 -10  15  -1   65.19    4.60
  10  15   1   69.59    4.20
 -11 -15  -1   48.00    4.20
 -11  15  -1   40.60    4.30
 -12 -15  -1   20.50    3.80
 -12  15  -1   29.60    4.10
 -13 -15  -1   21.70    4.00
 -13  15  -1   18.10    3.80
 -13  16   1   15.70    3.70
  13  16  -1   15.60    3.10
 -12  16   1    6.60    3.20
  12  16  -1    3.80    2.50
 -11  16   1   10.50    3.00
  11  16  -1   12.50    2.50
  11  16  -1   13.80    2.70
  10 -16  -1   36.60    3.70
  10  16  -1   33.00    3.20
 -10  16   1   24.80    4.30
  10  16  -1   32.00    3.10
 -10  16   1   32.80    3.60
  10  16  -1   33.30    4.10
   9 -16  -1    3.00    2.20
  -9  16   1    1.50    2.30
   9  16  -1    1.60    1.80
   9  16  -1    1.30    1.70
  -9  16   1   -2.00    2.50
   9  16  -1    1.50    2.30
   8 -16  -1   13.30    2.40
  -8 -16   1   15.30    2.60
   8 -16  -1   13.60    2.10
   8  16  -1   10.60    2.10
   8  16  -1   12.90    2.10
  -8  16   1   11.40    2.50
   8  16  -1   13.80    2.80
  -8  16   1   12.80    2.50
   7 -16  -1   25.10    2.40
   7 -16  -1   19.40    2.70
  -7 -16   1   26.30    2.70
  -7  16   1   22.20    2.80
  -7  16   1   24.30    3.10
   7  16  -1   25.10    2.40
   7  16  -1   22.30    2.20
   7  16  -1   19.00    3.10
   7  16  -1   22.80    2.50
  -7  16   1   22.90    2.70
   7  16  -1   24.50    2.60
   6 -16  -1    0.70    1.70
  -6 -16   1    0.50    1.50
   6 -16  -1    2.70    1.30
   6  16  -1    1.90    1.30
   6  16  -1    1.40    1.50
   6  16  -1    1.10    1.20
  -6  16   1    0.50    2.00
   6  16  -1    1.60    1.80
  -6  16   1    0.10    1.70
  -6  16   1    2.20    1.70
   5 -16  -1   18.70    2.10
   5 -16  -1   18.30    2.00
  -5 -16   1   17.90    2.00
   5 -16  -1   17.30    2.40
   5  16  -1   21.50    2.00
   5  16  -1   18.30    2.50
  -5  16   1   22.10    2.30
   5  16  -1   18.30    1.80
  -5  16   1   16.40    2.20
  -5  16   1   21.80    2.60
   5  16  -1   23.10    2.20
   4 -16  -1  260.47   10.70
   4 -16  -1  258.57    8.80
  -4 -16   1  256.07    8.80
   4 -16  -1  241.58    9.00
  -4  16   1  261.27    9.30
  -4  16   1  247.58   10.30
   4  16  -1  254.37   10.10
  -4  16   1  261.07    8.90
   4  16  -1  251.27    8.80
   4  16  -1  249.18   12.00
   4  16  -1  255.47    9.10
  -3 -16   1   13.00    1.60
   3 -16  -1   11.10    1.60
   3 -16  -1    9.90    1.70
   3  16  -1   12.50    1.80
  -3  16   1    9.80    1.90
  -3  16   1   11.10    1.80
   3  16  -1   11.10    2.10
  -3  16   1   11.00    1.80
   3  16  -1   13.90    1.60
   2 -16  -1  209.68    7.50
   2 -16  -1  212.28    7.30
  -2 -16   1  206.48    7.30
   2  16  -1  206.98    8.30
   2  16  -1  212.58   10.00
  -2  16   1  204.28    8.50
  -2  16   1  214.98    7.50
   2  16  -1  206.18    7.30
  -2  16   1  216.18    7.70
   2  16  -1  211.58    7.60
   1 -16  -1    0.90    1.20
  -1 -16   1    1.20    0.90
   1 -16  -1    2.00    1.00
   1  16  -1    0.40    0.80
   1  16  -1    1.90    1.20
  -1  16   1    1.20    1.00
   1  16  -1    1.40    0.90
  -1  16   1    1.80    1.30
   1  16  -1    0.70    1.00
   1  16  -1    1.20    1.40
   0 -16  -1   44.50    2.20
   0 -16  -1   42.40    2.40
   0 -16   1   40.10    2.10
   0  16  -1   41.90    2.20
   0  16   1   43.00    3.10
   0  16  -1   42.80    2.50
   0  16   1   40.80    2.50
   0  16   1   42.50    2.40
   1 -16   1    2.30    0.90
  -1 -16  -1    3.40    1.00
  -1 -16  -1    2.50    1.30
  -1  16  -1    1.80    0.90
   1  16   1    2.90    1.50
   1  16   1    1.90    0.90
  -1  16  -1    1.50    1.30
   1  16   1    3.80    1.30
  -2 -16  -1  142.69    5.70
  -2 -16  -1  154.38    5.50
   2 -16   1  148.89    5.40
   2  16   1  138.99    7.30
   2  16   1  144.09    5.70
   2  16   1  144.79    6.10
  -2  16  -1  144.29    6.00
  -2  16  -1  154.08    5.80
   2  16   1  148.39    5.60
   3 -16   1   19.70    1.70
  -3 -16  -1   17.40    2.00
  -3 -16  -1   19.70    1.80
   3  16   1   21.00    2.40
   3  16   1   22.10    2.00
   3  16   1   16.70    1.70
  -3  16  -1   18.00    1.90
   3  16   1   23.60    2.00
  -3  16  -1   15.20    2.10
  -3  16  -1   14.90    1.70
  -4 -16  -1  213.78    7.50
  -4 -16  -1  209.68    7.80
   4 -16   1  206.68    7.40
  -4  16  -1  207.98    7.50
   4  16   1  199.18    8.50
   4  16   1  204.68   10.10
  -4  16  -1  206.18    8.50
   4  16   1  217.98    7.80
   4  16   1  206.68    7.50
  -4  16  -1  208.48    7.90
  -5 -16  -1   51.59    3.20
  -5 -16  -1   51.09    2.90
   5 -16   1   38.00    3.30
   5 -16   1   49.90    2.80
   5  16   1   48.70    3.00
   5  16   1   52.89    3.10
  -5  16  -1   40.80    2.90
  -5  16  -1   46.20    3.30
   5  16   1   48.40    3.70
  -5  16  -1   48.30    3.00
   5  16   1   43.90    2.80
   6 -16   1   32.10    3.10
  -6 -16  -1   40.10    2.80
  -6 -16  -1   35.30    3.10
   6  16   1   39.70    2.70
   6  16   1   40.60    3.50
  -6  16  -1   35.30    2.80
   6  16   1   35.20    2.60
  -6  16  -1   30.30    3.00
  -6  16  -1   36.50    3.20
   7 -16   1   50.99    3.80
  -7 -16  -1   57.79    3.50
  -7  16  -1   51.79    4.00
   7  16   1   51.19    4.30
  -7  16  -1   47.60    3.80
   7  16   1   55.69    3.40
   7  16   1   51.39    3.30
  -7  16  -1   51.09    3.40
  -8 -16  -1  126.39    5.60
   8 -16   1  115.99    6.30
  -8  16  -1  125.99    5.80
   8  16   1  120.49    5.40
  -8  16  -1  120.99    6.10
   8  16   1  118.19    5.80
   9 -16   1   87.69    5.50
  -9 -16  -1   92.49    5.00
   9  16   1   96.19    4.90
   9  16   1   95.19    5.00
  -9  16  -1   87.99    5.00
 -10 -16  -1   64.69    4.60
  10  16   1   68.59    4.40
 -10  16  -1   66.29    4.60
  10  16   1   72.79    4.40
 -11 -16  -1  102.69    5.70
 -11  16  -1   94.39    5.60
 -12 -16  -1    0.20    3.00
 -12  16  -1    5.10    3.10
 -13 -16  -1   80.49    6.00
 -13  16  -1   92.39    6.00
  13  17  -1    4.70    2.80
 -13  17   1    1.60    3.40
  12  17  -1    2.40    2.40
 -12  17   1    1.10    3.10
  11  17  -1    1.20    2.20
 -11  17   1    4.60    2.80
  10 -17  -1    8.20    2.70
 -10  17   1   -2.80    3.20
  10  17  -1    4.40    2.20
 -10  17   1    4.90    2.60
  10  17  -1    5.90    2.10
  10  17  -1    3.20    2.80
   9 -17  -1    4.00    2.40
  -9  17   1    7.10    2.50
   9  17  -1    4.20    2.00
  -9  17   1    1.20    2.60
   9  17  -1    4.20    1.90
   9  17  -1    4.70    2.70
   8 -17  -1    7.50    2.30
   8 -17  -1    6.00    1.90
  -8 -17   1    5.60    2.10
   8  17  -1    6.00    1.80
  -8  17   1    6.50    2.30
   8  17  -1    5.40    1.90
  -8  17   1    3.90    2.10
   8  17  -1    6.10    2.50
   7 -17  -1   38.00    3.20
   7 -17  -1   30.90    2.60
  -7 -17   1   33.60    2.90
   7  17  -1   32.40    2.60
   7  17  -1   33.90    3.50
   7  17  -1   35.70    2.70
  -7  17   1   32.20    3.40
   7  17  -1   30.90    2.80
  -7  17   1   34.70    3.00
  -7  17   1   37.00    3.10
   7  17  -1   34.20    2.90
   6 -17  -1   29.20    2.90
  -6 -17   1   28.50    2.50
   6 -17  -1   30.00    2.50
   6  17  -1   32.90    2.40
   6  17  -1   27.60    3.20
   6  17  -1   32.40    2.50
   6  17  -1   32.90    2.70
  -6  17   1   26.00    3.00
  -6  17   1   31.50    2.80
  -6  17   1   34.70    2.90
   5 -17  -1   28.90    2.50
   5 -17  -1   30.10    2.80
   5 -17  -1   29.30    2.30
  -5 -17   1   27.90    2.30
  -5  17   1   29.70    2.60
   5  17  -1   28.40    2.10
  -5  17   1   31.50    2.80
   5  17  -1   30.70    3.00
   5  17  -1   26.60    2.40
   5  17  -1   30.40    2.30
  -5  17   1   31.00    2.50
   4 -17  -1    0.40    1.00
  -4 -17   1    1.20    1.20
   4 -17  -1   -0.40    1.60
   4 -17  -1    1.40    1.20
  -4  17   1    1.20    1.40
   4  17  -1    3.70    1.30
  -4  17   1    0.00    1.60
  -4  17   1    2.30    1.40
   4  17  -1    3.00    1.60
   4  17  -1    4.40    1.10
   4  17  -1    2.80    1.20
  -3 -17   1   64.59    3.10
   3 -17  -1   57.79    3.20
   3 -17  -1   67.39    3.10
   3  17  -1   66.09    4.20
   3  17  -1   79.79    3.40
  -3  17   1   80.49    3.70
   3  17  -1   70.69    3.40
  -3  17   1   66.89    3.40
  -3  17   1   63.89    3.60
   3  17  -1   66.99    3.20
  -2 -17   1   12.10    1.50
   2 -17  -1   12.60    1.50
   2 -17  -1   12.90    1.70
   2  17  -1   13.80    1.80
   2  17  -1   14.00    2.30
  -2  17   1   14.50    1.80
   2  17  -1   10.10    1.50
   2  17  -1   14.60    1.50
  -2  17   1   11.70    1.80
  -2  17   1   11.90    1.90
   1 -17  -1   15.10    1.70
   0 -17   1    7.80    1.30
   0 -17  -1   10.60    1.60
   0 -17  -1   10.30    1.50
   0  17   1    8.60    1.60
   0  17   1   10.70    1.50
   0  17   1   12.60    2.20
   0  17  -1    7.40    1.60
   0  17  -1    8.00    1.30
   1  17   1    9.20    2.10
  -1  17  -1    5.30    1.50
  -2 -17  -1    1.20    1.40
  -2 -17  -1    1.90    1.10
   2 -17   1    0.80    0.90
  -2  17  -1   -2.80    1.00
   2  17   1   -0.60    1.40
   2  17   1    0.50    1.20
   2  17   1    0.70    1.10
   2  17   1    0.90    1.10
  -2  17  -1   -0.50    1.40
  -3 -17  -1   50.69    3.00
   3 -17   1   48.30    2.70
  -3 -17  -1   47.60    2.70
  -3  17  -1   60.29    2.80
  -3  17  -1   46.10    2.80
   3  17   1   50.29    3.60
  -3  17  -1   48.90    3.10
   3  17   1   49.80    3.00
   3  17   1   53.69    2.90
   3  17   1   57.29    2.90
  -4 -17  -1    0.50    1.30
  -4 -17  -1   -1.10    1.50
   4 -17   1    1.20    1.10
  -4  17  -1    0.50    1.40
   4  17   1    0.30    1.10
  -4  17  -1   -2.00    1.30
   4  17   1    1.00    1.10
   4  17   1    0.50    1.50
  -4  17  -1    0.00    1.70
   4  17   1    1.40    1.40
   5 -17   1  132.19    5.40
  -5 -17  -1  144.49    5.60
   5 -17   1  145.79    6.80
  -5 -17  -1  128.49    5.80
  -5  17  -1  136.09    6.10
   5  17   1  143.39    7.40
   5  17   1  135.29    5.70
  -5  17  -1  137.19    5.70
   5  17   1  139.79    5.60
   5  17   1  138.39    6.10
  -5  17  -1  142.79    6.10
  -6 -17  -1    4.80    1.60
   6 -17   1    5.70    2.00
   6  17   1    7.60    1.60
  -6  17  -1    8.20    2.40
  -6  17  -1    7.10    2.00
   6  17   1    6.50    1.70
   6  17   1   10.90    2.30
  -6  17  -1    8.20    1.90
   7 -17   1  116.69    6.00
  -7 -17  -1  108.39    5.10
   7  17   1  107.39    5.00
   7  17   1  109.89    6.60
  -7  17  -1  103.89    5.20
  -7  17  -1  109.89    5.80
   7  17   1  110.99    5.30
   8 -17   1    2.20    2.20
  -8 -17  -1    1.60    2.00
  -8  17  -1    0.50    2.60
   8  17   1    2.20    1.70
  -8  17  -1    1.90    2.20
   8  17   1    3.10    1.80
  -9 -17  -1  152.78    6.90
   9 -17   1  163.28    7.90
   9  17   1  158.78    6.90
  -9  17  -1  160.38    7.00
   9  17   1  160.28    7.30
 -10 -17  -1    2.00    2.60
  10  17   1    0.20    2.10
 -10  17  -1    1.30    2.70
  10  17   1    1.40    2.10
 -11 -17  -1   81.39    5.30
 -11  17  -1   86.19    5.50
 -12 -17  -1    7.60    3.30
 -12  17  -1   11.90    3.50
 -13 -17  -1   42.40    4.90
 -13  17  -1   50.59    4.90
 -13  18   1    5.10    3.50
  13  18  -1    2.20    2.80
 -12  18   1   -0.40    3.10
  12  18  -1    3.20    2.40
  11  18  -1    1.00    2.30
 -11  18   1    2.50    2.90
  10 -18  -1    6.00    2.60
  10  18  -1    3.20    2.80
 -10  18   1    3.70    2.60
  10  18  -1    5.80    2.30
  10  18  -1    3.40    2.10
 -10  18   1   -9.50    3.20
   9 -18  -1   10.50    2.80
  -9  18   1    5.80    2.40
  -9  18   1    1.60    2.80
   9  18  -1    6.10    2.10
   9  18  -1    9.10    2.10
   9  18  -1    6.40    2.80
   8 -18  -1   30.30    2.80
   8 -18  -1   32.30    3.40
  -8  18   1   27.40    3.30
   8  18  -1   28.00    2.90
   8  18  -1   31.80    3.70
  -8  18   1   33.30    3.30
   8  18  -1   32.00    2.80
   7 -18  -1   34.10    2.80
   7 -18  -1   34.60    3.30
  -7 -18   1   30.80    2.90
   7  18  -1   35.20    3.00
   7  18  -1   35.30    3.00
   7  18  -1   31.10    3.60
   7  18  -1   33.40    2.70
  -7  18   1   39.90    3.50
  -7  18   1   32.30    3.00
  -7  18   1   37.60    3.20
   7  18  -1   34.90    2.80
  -6 -18   1   58.09    3.40
   6 -18  -1   50.79    3.80
   6 -18  -1   57.89    3.20
   6  18  -1   57.49    3.50
  -6  18   1   56.69    3.70
   6  18  -1   53.99    3.20
   6  18  -1   58.29    4.30
   6  18  -1   56.79    3.20
  -6  18   1   60.79    3.50
  -6  18   1   64.49    3.90
  -5 -18   1   99.69    4.40
   5 -18  -1  102.39    5.30
   5 -18  -1  100.69    4.30
   5  18  -1   97.19    4.60
  -5  18   1  106.59    5.00
   5  18  -1   97.39    5.70
  -5  18   1  100.89    4.50
  -5  18   1  100.79    5.00
   5  18  -1   98.49    4.40
   5  18  -1  102.49    4.70
   4 -18  -1   14.60    1.80
   4 -18  -1   15.20    2.50
   4 -18  -1   15.60    2.10
  -4 -18   1   20.10    1.90
  -4  18   1   20.20    2.40
   4  18  -1   19.50    1.90
  -4  18   1   16.80    2.10
   4  18  -1   17.60    1.70
  -4  18   1   15.40    2.10
   4  18  -1   14.90    2.40
   4  18  -1   18.70    2.10
   3 -18  -1  905.01   28.70
   3 -18  -1  898.91   29.30
  -3 -18   1  908.31   28.70
   3  18  -1  927.71   29.40
   3  18  -1  877.11   34.10
  -3  18   1  918.71   28.80
   3  18  -1  886.91   39.60
   3  18  -1  864.01   28.70
  -3  18   1  901.51   34.30
  -3  18   1  921.11   29.50
   2 -18  -1   16.20    1.90
   2 -18  -1   20.30    1.80
  -2 -18   1   20.40    1.80
   2  18  -1   18.40    1.90
  -2  18   1   20.00    2.10
  -2  18   1   19.00    2.20
   2  18  -1   20.90    2.10
  -2  18   1   21.20    2.00
   2  18  -1   16.50    2.40
   2  18  -1   19.90    1.70
   1 -18  -1 1406.96   45.30
  -1 -18   1 1370.96   44.30
   1 -18  -1 1405.56   44.40
  -1  18   1 1437.56   53.39
   1  18  -1 1430.16   45.40
   1  18  -1 1418.86   61.59
   1  18  -1 1445.16   53.19
  -1  18   1 1426.16   45.50
   1  18  -1 1391.76   44.50
   0 -18  -1    5.50    1.20
   0 -18  -1    6.80    1.50
   0 -18   1   10.70    1.40
   0  18   1    5.00    1.70
   0  18   1    7.70    1.60
   0  18  -1    7.10    1.60
   0  18  -1    5.10    1.10
   0  18   1    4.70    1.20
  -1 -18  -1  980.90   30.20
  -1 -18  -1  905.01   30.70
   1 -18   1  946.51   30.10
  -1  18  -1  942.31   35.80
  -1  18  -1  970.90   30.90
   1  18   1  938.71   36.00
   1  18   1  948.01   41.70
   1  18   1  965.00   30.90
   2 -18   1   -1.30    0.90
  -2 -18  -1    2.00    1.40
  -2 -18  -1    0.20    1.00
  -2  18  -1   -0.70    1.00
   2  18   1   -0.10    1.40
   2  18   1    1.40    1.10
  -2  18  -1    0.80    1.60
   2  18   1   -1.00    1.00
   2  18   1    0.10    1.20
  -3 -18  -1  987.20   31.80
   3 -18   1  985.90   31.00
  -3 -18  -1  981.80   31.00
   3  18   1  958.70   37.00
   3  18   1  995.20   31.20
   3  18   1  987.50   31.80
  -3  18  -1  982.40   31.10
   3  18   1  948.51   42.90
  -3  18  -1  966.00   36.90
  -3  18  -1  976.90   31.80
  -4 -18  -1   -0.30    1.50
  -4 -18  -1    0.60    1.30
   4 -18   1    1.80    1.20
  -4  18  -1    0.50    1.50
  -4  18  -1   -0.50    1.30
   4  18   1    0.80    1.60
   4  18   1   -1.10    1.30
  -4  18  -1    1.00    1.80
   4  18   1    0.50    1.20
   4  18   1    0.60    1.10
  -5 -18  -1  809.72   25.90
   5 -18   1  754.42   31.20
   5 -18   1  832.82   25.90
  -5 -18  -1  790.12   26.60
   5  18   1  791.62   30.70
   5  18   1  822.42   35.80
   5  18   1  788.92   26.00
  -5  18  -1  800.72   30.70
  -5  18  -1  827.02   26.70
   5  18   1  819.42   26.60
  -5  18  -1  801.92   26.00
   6 -18   1    9.80    2.20
  -6 -18  -1   11.40    2.10
  -6  18  -1    9.50    2.20
   6  18   1   14.90    2.90
  -6  18  -1   15.80    2.90
  -6  18  -1   15.00    2.30
   6  18   1   12.70    2.00
   6  18   1   15.00    2.30
   7 -18   1  396.26   16.90
  -7 -18  -1  404.76   14.20
  -7  18  -1  428.46   14.90
   7  18   1  416.36   19.30
   7  18   1  419.86   14.30
  -7  18  -1  422.16   14.30
   7  18   1  401.36   16.40
  -8 -18  -1    6.90    2.30
   8 -18   1    2.40    2.30
  -8  18  -1    4.90    2.40
   8  18   1    7.60    2.10
   8  18   1    7.40    1.90
  -8  18  -1   10.50    3.10
  -9 -18  -1  382.66   13.80
   9 -18   1  373.16   16.00
  -9  18  -1  388.46   13.90
   9  18   1  390.76   15.60
   9  18   1  394.96   13.80
 -10 -18  -1   21.10    3.40
 -10  18  -1   15.70    3.20
  10  18   1   19.60    3.20
 -11 -18  -1   68.89    4.90
 -11  18  -1   75.99    5.00
 -12 -18  -1   50.19    4.70
 -12  18  -1   60.29    4.90
 -13 -18  -1   28.00    4.60
 -13  18  -1   25.20    4.40
  13  19  -1    6.00    2.90
 -13  19   1    3.70    3.60
  12  19  -1    8.80    2.70
 -12  19   1   11.40    3.50
  11  19  -1    3.60    2.40
 -11  19   1    4.50    3.00
 -10  19   1    2.60    2.70
  10  19  -1    1.20    2.10
  10  19  -1   -0.60    2.70
  10  19  -1    0.30    2.00
   9 -19  -1    1.00    2.50
   9  19  -1   -2.00    2.40
   9  19  -1    0.60    1.90
  -9  19   1    0.30    2.40
  -9  19   1   -1.30    2.70
   9  19  -1    0.90    1.80
   8 -19  -1   16.00    2.90
  -8  19   1   14.00    2.70
   8  19  -1   16.10    2.40
   8  19  -1   14.00    3.00
   8  19  -1   17.00    2.60
  -8  19   1   15.80    2.60
   7 -19  -1    9.60    2.50
   7 -19  -1   12.60    2.10
  -7 -19   1    9.90    2.00
   7  19  -1   10.00    2.20
   7  19  -1   10.10    2.50
  -7  19   1    8.70    2.30
  -7  19   1   13.60    2.40
   7  19  -1   11.70    2.20
   7  19  -1   10.80    2.20
   7  19  -1    8.70    1.90
   6 -19  -1   73.09    4.40
  -6 -19   1   72.09    3.80
   6 -19  -1   74.79    3.70
  -6  19   1   67.89    3.90
   6  19  -1   68.69    4.80
  -6  19   1   68.19    4.30
   6  19  -1   66.19    3.70
  -6  19   1   70.79    4.10
   6  19  -1   70.89    3.90
   6  19  -1   73.79    3.70
  -5 -19   1    1.50    1.40
   5 -19  -1    2.60    1.30
   5 -19  -1    1.80    1.80
   5  19  -1    3.10    1.60
   5  19  -1    3.10    1.40
  -5  19   1    3.10    1.70
   5  19  -1    0.60    1.80
  -5  19   1    1.20    2.00
  -5  19   1    3.30    1.80
   5  19  -1    2.90    1.20
   4 -19  -1   74.39    4.30
   4 -19  -1   65.99    3.30
  -4 -19   1   66.29    3.30
   4 -19  -1   69.39    3.60
   4  19  -1   68.69    4.50
   4  19  -1   68.99    3.40
   4  19  -1   70.79    3.40
  -4  19   1   67.09    3.50
  -4  19   1   72.29    3.80
  -4  19   1   66.09    3.90
   4  19  -1   68.89    3.60
  -3 -19   1    2.30    1.10
   3 -19  -1    0.20    1.20
   3 -19  -1    1.70    1.10
   3  19  -1    3.00    1.40
  -3  19   1    2.20    1.70
  -3  19   1    0.30    1.40
   3  19  -1    4.40    1.70
   3  19  -1    0.40    1.10
   2 -19  -1   93.39    4.50
   2 -19  -1  117.39    4.50
  -2 -19   1  111.59    4.40
   2  19  -1  107.49    6.00
  -2  19   1  108.69    4.90
   2  19  -1  108.79    4.70
  -2  19   1  106.89    4.70
  -2  19   1  121.39    5.10
   2  19  -1  110.49    4.50
   2  19  -1  116.29    4.80
   0  19   1   63.19    4.20
   1 -19   1   13.60    1.60
  -1 -19  -1   15.30    1.80
  -1 -19  -1   21.20    2.10
   1  19   1   17.20    1.80
   1  19   1   13.80    2.00
  -1  19  -1   10.80    1.90
   2 -19   1    3.10    1.10
   2  19   1    3.40    1.40
  -2  19  -1    2.00    1.70
   2  19   1    2.30    1.60
  -3 -19  -1   24.10    2.40
  -3 -19  -1   20.60    2.10
   3 -19   1   21.70    1.90
  -3  19  -1   20.20    2.20
   3  19   1   25.70    2.80
   3  19   1   20.60    2.10
  -3  19  -1   26.30    2.00
   3  19   1   24.90    2.10
  -3  19  -1   21.80    2.50
   3  19   1   25.00    2.30
   4 -19   1   19.40    2.00
  -4 -19  -1   19.00    2.20
  -4 -19  -1   18.70    2.40
   4  19   1   26.60    2.30
  -4  19  -1   18.30    2.70
   4  19   1   20.90    2.80
   4  19   1   16.90    2.20
  -4  19  -1   25.00    2.50
   4  19   1   19.20    2.00
  -5 -19  -1   46.60    3.10
   5 -19   1   48.90    3.80
   5  19   1   58.59    4.20
   5  19   1   52.59    3.20
  -5  19  -1   53.29    3.70
  -5  19  -1   54.19    3.30
  -5  19  -1   50.29    3.20
   5  19   1   49.50    3.20
   5  19   1   56.19    3.20
   6 -19   1   83.69    5.10
  -6 -19  -1   81.89    4.40
   6  19   1   90.19    5.70
  -6  19  -1   90.19    4.50
  -6  19  -1   96.59    4.70
   6  19   1   87.39    4.50
  -6  19  -1   84.99    4.90
   6  19   1   90.59    4.40
   7 -19   1   45.40    3.90
  -7 -19  -1   47.70    3.50
   7  19   1   50.79    4.30
   7  19   1   42.50    3.20
   7  19   1   45.00    3.10
  -7  19  -1   41.00    3.40
  -7  19  -1   49.40    4.10
   8 -19   1   68.39    4.70
  -8 -19  -1   59.09    4.10
  -8  19  -1   66.59    4.30
   8  19   1   67.69    4.00
   8  19   1   61.49    4.00
  -8  19  -1   64.59    4.90
  -9 -19  -1   73.29    4.60
   9 -19   1   73.89    5.10
   9  19   1   73.19    4.30
   9  19   1   69.69    4.40
  -9  19  -1   66.59    4.60
 -10 -19  -1   50.19    4.30
  10  19   1   56.59    4.20
 -10  19  -1   51.09    4.40
 -11 -19  -1   13.90    3.30
 -11  19  -1   15.90    3.50
 -12 -19  -1   42.40    4.60
 -12  19  -1   45.60    4.70
 -13 -19  -1   12.80    3.90
 -13  19  -1   15.10    3.90
  13  20  -1   14.90    3.30
 -13  20   1   15.40    3.90
  12  20  -1   19.90    3.40
 -12  20   1   19.50    3.80
  11  20  -1   19.70    3.20
 -11  20   1   18.50    3.50
  10  20  -1   23.10    3.90
 -10  20   1   25.40    3.60
  10  20  -1   24.70    3.20
   9 -20  -1   13.20    2.90
   9  20  -1    7.50    2.10
   9  20  -1    7.10    2.30
  -9  20   1   -0.70    2.80
   9  20  -1    9.40    3.00
  -9  20   1   12.70    2.80
   8 -20  -1    2.50    2.40
  -8  20   1    0.20    2.20
  -8  20   1   -0.30    2.20
   8  20  -1    1.90    1.70
   8  20  -1    3.20    2.50
   8  20  -1    2.40    1.90
   7 -20  -1   38.10    3.70
   7 -20  -1   41.10    3.00
   7  20  -1   38.60    3.10
  -7  20   1   40.10    3.30
  -7  20   1   40.70    3.50
   7  20  -1   42.20    3.30
   7  20  -1   36.40    3.90
   7  20  -1   40.60    2.90
   6 -20  -1   31.30    3.30
  -6 -20   1   31.10    2.80
   6 -20  -1   31.90    2.50
   6  20  -1   36.90    2.80
  -6  20   1   33.20    2.90
   6  20  -1   34.40    2.90
  -6  20   1   34.30    3.00
   6  20  -1   30.10    2.50
  -6  20   1   28.10    3.40
   6  20  -1   31.30    3.40
   5 -20  -1   17.60    2.00
   5 -20  -1   13.20    2.70
  -5 -20   1   16.70    2.10
   5  20  -1   15.40    2.30
  -5  20   1   16.10    2.40
   5  20  -1   16.10    2.10
   5  20  -1   16.60    2.00
  -5  20   1   18.10    2.80
  -5  20   1   22.10    2.50
   5  20  -1   14.70    2.70
   4 -20  -1  165.68    8.00
   4 -20  -1  177.28    6.60
   4 -20  -1  171.78    6.70
  -4 -20   1  174.38    6.50
   4  20  -1  185.38    7.00
   4  20  -1  171.98    7.20
   4  20  -1  174.28    6.60
  -4  20   1  179.48    6.80
   4  20  -1  173.88    8.80
  -4  20   1  180.18    7.10
  -4  20   1  170.18    7.50
   3 -20  -1   10.50    1.80
   3 -20  -1   10.20    1.50
  -3 -20   1   11.70    1.70
   3  20  -1    9.70    1.50
   3  20  -1   10.20    1.70
  -3  20   1    8.40    1.70
   3  20  -1   10.30    2.20
  -3  20   1    7.40    1.60
   3  20  -1    9.10    1.70
  -3  20   1    9.20    1.90
   2 -20  -1  612.74   20.10
  -2 -20   1  591.14   20.00
   2 -20  -1  606.44   20.50
  -2  20   1  635.64   20.80
  -2  20   1  618.24   23.80
   2  20  -1  630.54   23.60
   2  20  -1  606.44   20.10
   2  20  -1  630.24   27.70
   2  20  -1  631.94   20.60
  -1 -20   1    3.10    1.10
   1 -20  -1    7.00    1.60
   1 -20  -1    5.50    1.30
   1  20  -1    5.40    1.90
   1  20  -1    3.50    1.10
  -1  20   1    4.10    1.30
   1  20  -1    5.40    1.60
  -1  20   1    4.30    1.60
   1  20  -1   10.50    1.60
   0 -20  -1 1624.74   53.19
   0 -20  -1 1645.54   52.19
   0 -20   1 1612.34   52.09
   0  20   1 1687.73   53.29
   0  20  -1 1689.43   62.49
   0  20   1 1701.83   62.69
   0  20  -1 1692.93   53.29
   0  20   1 1651.43   72.39
  -1 -20  -1    5.00    1.30
  -1 -20  -1    8.00    1.70
   1 -20   1    6.50    1.30
   1  20   1    5.60    2.00
   1  20   1    4.80    1.30
  -1  20  -1    4.90    1.20
   1  20   1    6.30    1.70
  -1  20  -1    6.50    1.80
  -2 -20  -1 1392.76   46.70
   2 -20   1 1471.35   45.70
  -2 -20  -1 1465.25   45.80
   2  20   1 1428.06   63.39
   2  20   1 1488.85   46.80
  -2  20  -1 1430.26   54.69
   2  20   1 1478.05   46.00
  -2  20  -1 1504.15   46.90
   2  20   1 1428.86   54.89
   3 -20   1    6.60    1.30
  -3 -20  -1    4.80    1.70
  -3 -20  -1    5.60    1.40
   3  20   1    5.60    1.90
  -3  20  -1    7.80    2.00
  -3  20  -1    5.20    1.40
  -3  20  -1    7.00    1.70
   3  20   1    5.60    1.30
   3  20   1    6.80    1.70
   3  20   1    3.90    1.40
  -4 -20  -1  881.11   29.20
  -4 -20  -1  900.31   28.50
   4 -20   1  911.91   28.40
   4  20   1  871.21   28.60
  -4  20  -1  917.31   29.30
   4  20   1  876.91   39.30
   4  20   1  875.51   29.10
   4  20   1  866.41   33.80
  -4  20  -1  884.31   33.70
  -4  20  -1  887.81   28.60
  -5 -20  -1    7.60    1.80
   5  20   1   12.00    1.90
  -5  20  -1    9.60    2.00
   5  20   1    9.90    2.00
  -5  20  -1    9.60    1.90
   5  20   1   13.60    2.80
  -5  20  -1   12.40    2.50
   5  20   1   11.80    2.00
   6 -20   1  976.80   39.80
  -6 -20  -1 1018.90   33.00
   6  20   1 1039.60   33.20
  -6  20  -1 1050.79   33.10
   6  20   1 1054.59   45.60
   6  20   1 1012.50   39.20
  -6  20  -1 1038.20   34.00
   7 -20   1    8.40    2.50
  -7 -20  -1    9.20    2.20
   7  20   1    9.50    1.90
  -7  20  -1   14.30    2.50
  -7  20  -1   13.20    3.20
   7  20   1   10.50    2.10
   7  20   1   13.90    3.20
  -8 -20  -1  500.65   17.80
   8 -20   1  526.95   21.30
   8  20   1  530.15   17.90
  -8  20  -1  527.25   18.70
   8  20   1  528.65   20.60
  -8  20  -1  523.25   17.90
  -9 -20  -1   12.70    2.80
   9 -20   1   18.30    3.70
   9  20   1   18.10    2.90
  -9  20  -1   11.00    2.90
   9  20   1   14.90    2.60
 -10 -20  -1  133.19    6.50
  10  20   1  135.09    6.40
 -10  20  -1  127.39    6.50
 -11 -20  -1   -1.10    2.70
 -11  20  -1    0.40    2.90
 -12 -20  -1   38.80    4.50
 -12  20  -1   40.70    4.50
  13  21  -1    3.10    2.80
 -13  21   1    7.70    3.60
  12  21  -1   12.80    3.00
 -12  21   1    4.00    3.40
  11  21  -1   -1.20    2.20
 -11  21   1    1.30    3.00
  10  21  -1    7.80    2.40
  10  21  -1    6.60    3.10
 -10  21   1    6.30    2.90
   9 -21  -1    3.50    2.90
   9  21  -1    1.30    2.00
  -9  21   1   -0.70    2.40
   9  21  -1    2.30    1.90
  -9  21   1   -4.70    2.80
   9  21  -1    3.60    2.80
   8 -21  -1    1.40    2.40
   8  21  -1    0.10    1.60
   8  21  -1   -1.10    1.70
   8  21  -1   -0.50    2.40
  -8  21   1    0.10    2.20
  -8  21   1   -2.40    2.20
   7 -21  -1   21.50    2.60
   7 -21  -1   18.20    3.20
   7  21  -1   20.20    2.60
   7  21  -1   18.70    2.80
  -7  21   1   22.30    3.00
  -7  21   1   20.10    2.90
   7  21  -1   24.00    3.40
   7  21  -1   22.30    2.40
  -6 -21   1   -0.90    1.60
   6 -21  -1    1.70    1.50
   6 -21  -1    0.50    2.00
  -6  21   1    0.40    2.30
  -6  21   1    1.00    1.90
  -6  21   1    0.90    1.90
   6  21  -1    0.50    1.40
   6  21  -1    1.10    1.80
   6  21  -1    0.20    1.50
   6  21  -1    1.00    2.10
  -5 -21   1   29.30    2.60
   5 -21  -1   31.60    2.50
   5 -21  -1   35.40    3.40
  -5  21   1   34.90    2.90
   5  21  -1   30.90    3.40
  -5  21   1   39.30    3.30
   5  21  -1   31.30    2.80
   5  21  -1   30.50    2.40
   5  21  -1   29.60    2.60
  -5  21   1   36.00    2.90
   4 -21  -1    4.30    2.00
   4 -21  -1    3.60    1.40
  -4 -21   1    1.40    1.30
   4  21  -1    4.20    1.70
  -4  21   1    4.70    1.60
   4  21  -1    1.40    1.30
   4  21  -1    4.90    1.30
   4  21  -1    2.20    2.00
  -4  21   1    4.70    1.80
  -4  21   1    4.00    2.00
  -3 -21   1   32.90    2.40
   3 -21  -1   38.90    2.50
   3 -21  -1   30.30    2.50
  -3  21   1   37.50    2.70
   3  21  -1   35.80    2.30
  -3  21   1   33.30    2.60
   3  21  -1   36.20    2.50
   3  21  -1   36.90    3.30
  -3  21   1   37.80    3.10
   3  21  -1   38.20    2.70
   2 -21  -1    0.40    1.30
  -2 -21   1    0.90    1.10
   2 -21  -1    2.20    1.20
  -2  21   1    3.10    1.70
   2  21  -1    0.40    1.10
   2  21  -1    0.60    1.40
   1 -21  -1   27.10    2.10
   1 -21  -1   27.80    2.40
  -1 -21   1   32.20    2.20
   1  21  -1   32.00    2.60
  -1  21   1   28.50    2.60
  -1  21   1   31.70    2.40
   1  21  -1   28.30    3.20
   1  21  -1   31.50    2.10
   1  21  -1   32.80    2.30
   0  21   1   55.49    4.10
  -1 -21  -1   62.19    3.30
  -1 -21  -1   56.99    3.00
   1 -21   1   50.89    2.80
   1  21   1   50.89    4.00
  -1  21  -1   51.69    3.30
   1  21   1   58.09    3.30
   1  21   1   55.29    3.10
  -1  21  -1   52.49    2.90
   2 -21   1   17.70    1.90
  -2 -21  -1   17.40    2.00
   2  21   1   22.20    2.10
   2  21   1   19.70    2.30
   2  21   1   16.50    2.10
  -2  21  -1   20.80    2.60
   3 -21   1   10.70    1.60
  -3 -21  -1   12.60    2.20
  -3 -21  -1    9.10    1.70
   3  21   1   10.80    1.90
  -3  21  -1    7.80    2.10
  -3  21  -1   13.30    1.80
   3  21   1   10.30    1.80
   3  21   1    9.30    2.20
   3  21   1   11.70    2.00
  -4 -21  -1   53.39    3.50
  -4 -21  -1   58.89    3.20
   4  21   1   57.59    3.50
   4  21   1   57.79    3.40
   4  21   1   62.19    3.30
  -4  21  -1   52.79    3.70
   4  21   1   65.19    4.40
  -4  21  -1   54.39    3.40
  -4  21  -1   60.39    3.30
  -5 -21  -1    2.50    1.70
   5  21   1    4.50    1.50
  -5  21  -1    4.00    2.20
   5  21   1    7.00    2.30
   5  21   1    3.60    1.60
  -5  21  -1    3.50    1.80
  -5  21  -1    6.30    2.00
  -6 -21  -1  183.88    7.40
   6 -21   1  190.78    9.00
  -6  21  -1  175.78    7.50
   6  21   1  197.48    7.60
  -6  21  -1  195.78    8.20
   6  21   1  196.78   10.00
   6  21   1  192.98    8.20
   7 -21   1    1.00    2.30
  -7 -21  -1    0.50    1.90
   7  21   1    0.60    2.40
  -7  21  -1    1.60    2.20
   7  21   1    0.90    1.80
   7  21   1   -0.50    1.70
  -7  21  -1    0.20    2.60
  -8 -21  -1  162.88    7.10
   8 -21   1  172.88    8.40
   8  21   1  166.48    7.10
  -8  21  -1  166.48    7.80
   8  21   1  171.98    7.60
  -8  21  -1  157.18    7.10
  -9 -21  -1   -1.00    2.30
   9 -21   1   -1.10    2.60
   9  21   1    1.90    2.10
   9  21   1    0.50    2.00
  -9  21  -1   -1.90    2.40
 -10 -21  -1   73.19    4.80
 -10  21  -1   57.19    4.50
  10  21   1   63.09    4.40
 -11 -21  -1    3.20    2.90
 -11  21  -1    4.60    3.00
 -12 -21  -1   22.00    4.00
 -12  21  -1   24.40    4.10
  13  22  -1   13.10    3.30
 -13  22   1   16.50    4.00
 -12  22   1    7.40    3.40
  12  22  -1   12.90    3.10
 -11  22   1   23.20    3.80
  11  22  -1   25.50    3.40
  10  22  -1    6.10    2.40
 -10  22   1   10.30    3.10
  10  22  -1    8.90    3.20
   9 -22  -1   67.29    5.20
   9  22  -1   70.89    4.20
  -9  22   1   74.89    4.70
  -9  22   1   57.29    4.90
   9  22  -1   69.59    4.30
   9  22  -1   71.29    5.60
   8 -22  -1    0.30    2.50
   8  22  -1    1.70    2.60
  -8  22   1   -3.40    2.20
   8  22  -1   -1.40    1.70
   8  22  -1    2.30    1.80
  -8  22   1   -1.00    2.30
   7 -22  -1    6.60    2.60
   7  22  -1    7.20    2.60
   7  22  -1    6.60    1.90
   7  22  -1    7.40    1.80
  -7  22   1    7.90    2.40
  -7  22   1    6.90    2.30
   6 -22  -1    9.70    2.50
   6 -22  -1   11.00    2.00
   6  22  -1   12.90    2.20
   6  22  -1   10.90    1.90
  -6  22   1   13.80    2.60
  -6  22   1    9.80    2.80
   6  22  -1    9.50    2.20
   6  22  -1   12.80    2.70
  -6  22   1   10.10    2.20
  -5 -22   1    3.90    1.60
   5 -22  -1    5.60    2.20
   5 -22  -1    6.80    1.60
   5  22  -1    6.60    1.50
  -5  22   1    5.90    2.50
   5  22  -1    8.10    1.70
   5  22  -1    5.10    1.90
  -5  22   1    7.20    1.90
  -5  22   1    4.80    1.90
   5  22  -1    6.70    2.30
   4 -22  -1    0.70    1.30
  -4 -22   1   -0.50    1.30
   4  22  -1    1.00    1.20
   4  22  -1    0.00    1.50
  -4  22   1    0.30    1.90
  -4  22   1   -0.70    1.50
   4  22  -1    1.20    1.90
   4  22  -1    0.70    1.40
  -4  22   1   -0.10    1.60
   3 -22  -1   10.10    1.60
  -3 -22   1    8.80    1.50
  -3  22   1   11.00    1.90
  -3  22   1   11.30    2.00
   3  22  -1   10.40    2.40
   3  22  -1    9.90    1.90
   3  22  -1    7.10    1.60
  -3  22   1   11.50    2.20
   3  22  -1    9.00    1.60
   2 -22  -1   -1.20    1.30
  -2 -22   1    1.00    1.20
   2 -22  -1    1.10    1.20
  -2  22   1    2.50    1.40
   2  22  -1   -0.70    1.50
   2  22  -1    1.70    2.00
   2  22  -1   -0.50    1.10
   2  22  -1   -0.40    1.20
  -2  22   1    2.20    1.80
   1 -22  -1   15.30    2.10
   1 -22  -1   20.60    2.00
  -1 -22   1   23.30    2.00
  -1  22   1   20.90    2.40
  -1  22   1   21.30    2.10
   1  22  -1   22.60    3.00
   1  22  -1   19.20    2.30
   1  22  -1   21.00    1.80
   1  22  -1   16.30    2.00
   0 -22   1    3.40    1.20
   0 -22  -1    1.80    1.20
   0 -22  -1    1.60    1.50
   0  22   1    3.90    2.10
   0  22   1    1.50    1.20
   0  22   1    1.90    1.60
   0  22  -1    2.90    1.70
   0  22  -1    0.30    1.10
  -1 -22  -1  479.85   15.80
  -1 -22  -1  463.25   16.20
   1 -22   1  461.65   15.70
  -1  22  -1  500.45   18.40
   1  22   1  487.55   21.80
  -1  22  -1  473.55   16.30
   1  22   1  469.65   16.40
   1  22   1  479.85   18.60
   2 -22   1    7.50    1.40
  -2 -22  -1    4.40    1.40
  -2 -22  -1    8.00    1.90
  -2  22  -1    9.30    2.10
  -2  22  -1    8.00    1.60
   2  22   1    7.00    1.60
   2  22   1    7.00    1.80
   2  22   1    5.30    1.40
   2  22   1    8.40    2.20
  -3 -22  -1  137.29    6.00
   3 -22   1  139.79    5.60
  -3 -22  -1  138.39    5.60
   3  22   1  141.49    7.60
   3  22   1  143.09    5.90
   3  22   1  138.49    6.20
  -3  22  -1  146.19    6.20
  -3  22  -1  145.19    6.10
   3  22   1  146.09    6.00
  -4 -22  -1   21.30    2.40
  -4  22  -1   17.40    2.20
   4  22   1   22.30    3.10
   4  22   1   21.50    2.20
   4  22   1   25.20    2.50
  -4  22  -1   25.70    2.90
  -4  22  -1   24.80    2.50
   4  22   1   23.80    2.60
  -5 -22  -1  233.28    8.70
   5  22   1  237.58   11.80
  -5  22  -1  243.48    8.90
   5  22   1  233.28    8.90
   5  22   1  230.78    9.80
  -5  22  -1  246.08    9.40
  -6 -22  -1   94.79    4.80
   6 -22   1   82.29    5.50
  -6  22  -1  103.09    5.40
   6  22   1   93.99    4.70
   6  22   1   95.79    6.10
   6  22   1   94.29    4.80
  -6  22  -1   98.29    4.80
  -7 -22  -1  102.99    5.10
   7 -22   1  100.29    6.00
  -7  22  -1  116.29    6.10
   7  22   1  107.09    5.30
   7  22   1  104.09    6.70
   7  22   1  105.09    5.10
  -7  22  -1  101.99    5.30
  -8 -22  -1  114.19    5.70
   8 -22   1  105.29    6.50
   8  22   1  115.49    5.60
   8  22   1  113.49    5.70
  -8  22  -1  108.69    5.70
  -9 -22  -1   26.00    3.60
   9  22   1   29.80    3.20
  -9  22  -1   32.90    3.90
   9  22   1   32.60    3.40
 -10 -22  -1   63.19    4.60
 -10  22  -1   57.59    4.70
  10  22   1   62.99    4.40
 -11 -22  -1    5.50    2.90
 -11  22  -1   11.90    3.40
 -12  22  -1   31.40    4.40
 -12  23   1    1.70    3.30
  12  23  -1    1.70    2.60
  11  23  -1    6.50    2.60
 -11  23   1    4.80    3.10
 -10  23   1    2.00    2.90
  10  23  -1    2.90    2.30
   9 -23  -1    3.40    3.00
   9  23  -1    4.00    2.20
   9  23  -1    3.50    2.90
  -9  23   1   -1.00    2.60
   8 -23  -1   12.40    3.20
   8  23  -1    6.10    2.70
   8  23  -1    5.80    2.10
  -8  23   1    1.00    2.50
  -8  23   1    5.00    2.50
   8  23  -1   12.20    2.50
   7 -23  -1    9.90    2.90
   7  23  -1    9.00    1.90
   7  23  -1    7.80    2.10
   7  23  -1    5.20    2.60
  -7  23   1    6.20    2.40
  -7  23   1    3.70    2.30
   6 -23  -1   12.90    2.00
   6 -23  -1    9.20    2.70
  -6  23   1    9.00    2.90
   6  23  -1   11.40    2.70
  -6  23   1   12.00    2.30
   6  23  -1   14.10    2.10
  -6  23   1    4.80    2.10
   6  23  -1    7.70    2.20
   6  23  -1    8.00    1.90
   5 -23  -1   11.90    1.90
   5 -23  -1    9.40    2.50
   5  23  -1   12.00    2.30
   5  23  -1   12.80    2.60
  -5  23   1   11.90    2.40
  -5  23   1   10.70    2.60
   5  23  -1   11.70    2.00
  -5  23   1    8.30    2.10
   5  23  -1   12.00    1.90
  -4 -23   1   -0.80    1.30
   4 -23  -1   -1.80    1.20
  -4  23   1    0.60    1.70
  -4  23   1   -0.20    2.00
   4  23  -1    0.30    1.40
  -4  23   1    1.70    1.60
   4  23  -1   -0.20    1.20
   4  23  -1    0.30    1.60
   4  23  -1   -0.90    1.90
   3 -23  -1   11.10    1.80
  -3 -23   1    7.50    1.60
  -3  23   1   12.30    2.10
   3  23  -1    9.80    1.70
   3  23  -1   11.80    1.70
  -3  23   1   14.00    2.40
   3  23  -1   11.00    2.50
   3  23  -1    8.20    2.00
  -3  23   1   13.50    2.10
   2 -23  -1   10.80    1.80
  -2 -23   1    7.50    1.50
   2 -23  -1    5.60    1.70
   2  23  -1    5.90    2.20
   2  23  -1    9.30    2.00
  -2  23   1   15.20    2.40
   2  23  -1    8.10    1.60
   2  23  -1    7.40    1.60
  -2  23   1   10.00    1.90
   1 -23  -1   16.60    2.10
   1 -23  -1   19.50    2.30
  -1 -23   1   19.90    2.00
  -1  23   1   18.90    2.50
   1  23  -1   18.60    2.10
   1  23  -1   21.10    2.40
  -1  23   1   18.50    2.00
   1  23  -1   16.10    2.90
   1  23  -1   19.70    1.80
   0 -23  -1   16.70    1.90
   0 -23  -1   14.40    2.20
   0 -23   1   17.40    1.90
   0  23   1   18.40    2.40
   0  23  -1   19.30    2.60
   0  23   1   12.90    1.90
   0  23   1   10.60    2.60
   0  23  -1   16.10    1.70
   1 -23   1    3.60    1.20
  -1 -23  -1    4.20    1.40
  -1 -23  -1    8.10    1.80
  -1  23  -1    1.70    1.70
   1  23   1    6.10    1.80
  -2 -23  -1   19.60    2.40
   2 -23   1   19.50    2.10
  -2 -23  -1   23.90    2.20
  -2  23  -1   18.90    2.80
   2  23   1   22.80    2.20
   2  23   1   24.70    3.20
  -2  23  -1   24.20    1.90
   2  23   1   25.80    2.60
   2  23   1   23.50    2.40
  -3 -23  -1    3.90    1.50
   3  23   1    7.80    1.90
   3  23   1    6.90    1.70
   3  23   1    3.80    2.20
  -3  23  -1    3.60    1.40
  -3  23  -1    6.00    2.40
   3  23   1    5.10    1.50
  -4 -23  -1   45.10    3.00
  -4  23  -1   45.40    3.20
  -4  23  -1   41.50    2.70
   4  23   1   37.70    2.90
   4  23   1   41.00    3.20
  -4  23  -1   40.00    3.40
   4  23   1   45.40    2.80
   4  23   1   39.20    3.80
  -5 -23  -1   65.69    3.80
   5  23   1   73.09    3.90
   5  23   1   72.99    5.10
  -5  23  -1   70.19    4.70
   5  23   1   74.79    4.00
  -5  23  -1   58.59    3.90
  -6 -23  -1  124.39    5.80
   6 -23   1  137.29    7.10
  -6  23  -1  130.59    6.40
   6  23   1  133.89    7.80
   6  23   1  137.99    6.00
  -6  23  -1  134.09    6.00
   6  23   1  132.79    6.20
  -7 -23  -1   78.19    4.50
   7 -23   1   71.49    5.10
   7  23   1   78.59    4.50
   7  23   1   80.19    4.40
  -7  23  -1   76.59    5.10
   7  23   1   76.19    5.60
  -7  23  -1   74.49    4.50
   8 -23   1  114.79    6.60
  -8 -23  -1  109.89    5.60
   8  23   1  121.69    5.80
  -8  23  -1  105.49    5.70
   8  23   1  102.99    5.50
  -9 -23  -1   34.80    4.00
   9  23   1   43.40    3.80
  -9  23  -1   42.90    4.10
   9  23   1   43.90    3.60
 -10 -23  -1   31.10    3.90
 -10  23  -1   27.60    4.00
  10  23   1   39.70    3.90
 -11 -23  -1   14.00    3.40
 -11  23  -1   18.00    3.70
 -12  23  -1   17.10    3.80
  12  24  -1    7.80    2.90
 -12  24   1    6.20    3.40
  11  24  -1    1.50    2.50
 -11  24   1    0.20    3.10
 -10  24   1   22.00    3.70
  10  24  -1   16.30    2.90
  -9  24   1    7.00    2.90
   9  24  -1    7.50    2.40
   9  24  -1    2.10    2.90
   8 -24  -1   62.49    5.00
   8  24  -1   71.69    3.90
   8  24  -1   59.79    4.00
  -8  24   1   59.59    4.50
   8  24  -1   60.59    5.30
  -8  24   1   73.49    4.60
   7 -24  -1   24.80    3.80
   7  24  -1   18.60    2.70
   7  24  -1   19.60    2.50
   7  24  -1   17.20    3.50
  -7  24   1   20.80    3.10
  -7  24   1   23.90    3.20
   6 -24  -1   24.90    3.60
   6 -24  -1   23.40    2.60
  -6  24   1   27.30    2.90
   6  24  -1   24.30    2.40
  -6  24   1   26.90    3.10
   6  24  -1   21.50    2.90
   6  24  -1   23.10    2.80
   6  24  -1   27.50    3.60
   5 -24  -1   11.30    2.60
   5 -24  -1   14.10    2.10
   5  24  -1   15.40    2.60
  -5  24   1   12.40    2.40
   5  24  -1   14.30    3.10
  -5  24   1   14.20    2.70
  -5  24   1   16.70    2.60
   5  24  -1   13.90    2.00
   5  24  -1   11.50    2.00
  -4 -24   1   24.30    2.40
   4 -24  -1   21.90    2.30
  -4  24   1   27.50    2.60
  -4  24   1   29.60    2.80
   4  24  -1   21.80    2.10
  -4  24   1   21.40    3.00
   4  24  -1   18.10    2.60
   4  24  -1   25.50    2.60
   4  24  -1   21.20    3.30
  -3 -24   1   11.80    1.90
   3 -24  -1   12.30    2.00
   3  24  -1   11.80    1.80
   3  24  -1   14.40    2.40
   3  24  -1   15.30    2.20
   3  24  -1   13.30    2.60
  -3  24   1   14.30    2.50
  -3  24   1   12.30    2.20
   2 -24  -1  135.49    5.50
  -2 -24   1  133.79    5.60
  -2  24   1  141.29    6.20
   2  24  -1  143.19    6.00
  -2  24   1  147.79    6.30
   2  24  -1  133.79    5.70
   2  24  -1  139.19    5.90
   2  24  -1  139.49    7.70
  -1 -24   1   14.50    1.90
   1 -24  -1   15.90    2.10
   1  24  -1   12.60    1.80
   1  24  -1   15.10    3.00
   1  24  -1   15.80    2.10
  -1  24   1   13.10    2.00
   1  24  -1   13.40    2.20
  -1  24   1   17.10    2.60
   0 -24   1  193.08    7.10
   0 -24  -1  179.88    7.40
   0 -24  -1  194.98    7.20
   0  24  -1  200.18    7.80
   0  24  -1  199.08    7.70
   0  24   1  183.28    9.80
   0  24   1  193.28    8.10
   0  24   1  188.48    7.60
   1 -24   1    4.20    1.30
  -1 -24  -1    1.70    1.40
   1  24   1    2.60    2.30
  -1  24  -1    2.50    1.20
  -1  24  -1    4.00    1.90
   1  24   1    3.80    1.90
   1  24   1    3.70    1.40
  -2 -24  -1   92.49    4.30
  -2  24  -1   94.89    4.80
   2  24   1   95.89    4.70
   2  24   1   95.89    5.90
   2  24   1   95.29    4.50
  -2  24  -1   90.79    4.20
   2  24   1   95.39    4.60
  -3 -24  -1    4.90    1.60
   3  24   1    5.60    1.70
   3  24   1    5.50    2.30
   3  24   1    3.40    1.80
  -3  24  -1    5.30    2.30
   3  24   1    2.20    1.50
  -3  24  -1    3.00    1.40
  -4 -24  -1   70.29    3.80
   4  24   1   76.69    4.20
  -4  24  -1   79.39    4.50
  -4  24  -1   75.09    4.10
   4  24   1   74.59    4.00
   4  24   1   75.79    4.00
   4  24   1   72.59    5.20
  -5 -24  -1   48.10    3.30
   5  24   1   48.00    3.20
  -5  24  -1   43.50    3.50
   5  24   1   45.90    3.40
   5  24   1   51.69    4.30
  -5  24  -1   41.10    3.90
   6 -24   1  218.48   10.20
  -6 -24  -1  201.98    8.30
  -6  24  -1  231.78    9.20
   6  24   1  232.38    8.70
  -6  24  -1  211.58    8.50
   6  24   1  218.78   11.30
   6  24   1  216.28    9.30
  -7 -24  -1   73.29    4.30
   7 -24   1   58.39    4.90
  -7  24  -1   65.59    5.00
   7  24   1   68.29    4.10
  -7  24  -1   64.89    4.40
   7  24   1   63.29    4.20
   7  24   1   71.49    5.40
   8 -24   1   94.89    6.10
  -8 -24  -1   98.59    5.30
   8  24   1  101.59    5.20
   8  24   1   89.39    5.10
  -8  24  -1   93.29    5.20
  -9 -24  -1   75.49    4.80
   9  24   1   72.09    4.70
   9  24   1   69.49    4.60
  -9  24  -1   77.89    5.00
 -10 -24  -1   21.80    3.70
  10  24   1   19.20    3.10
 -10  24  -1   19.90    3.50
 -11  24  -1   40.40    4.50
 -12  24  -1   15.60    3.90
 -12  25   1   -2.80    3.30
  12  25  -1   -0.10    2.80
 -11  25   1   -0.40    3.10
  11  25  -1    1.30    2.50
  10  25  -1   -0.80    2.20
 -10  25   1    1.50    2.90
   9  25  -1    3.80    2.20
   9  25  -1    7.50    3.20
  -9  25   1    3.60    2.90
   8 -25  -1    3.10    3.00
  -8  25   1    5.00    2.60
   8  25  -1    1.50    2.80
  -8  25   1   -3.50    2.50
   8  25  -1    3.90    2.10
   7 -25  -1   28.40    4.00
  -7  25   1   22.00    3.20
   7  25  -1   29.90    2.80
  -7  25   1   27.60    3.30
   7  25  -1   27.50    3.90
   7  25  -1   26.40    3.00
   6 -25  -1    5.50    2.60
   6  25  -1    6.50    1.70
   6  25  -1    5.60    2.00
  -6  25   1    6.60    2.30
   6  25  -1    7.90    2.30
  -6  25   1    4.90    2.10
   6  25  -1    9.30    2.70
   5 -25  -1   43.50    3.10
   5 -25  -1   48.60    4.30
   5  25  -1   42.50    4.10
  -5  25   1   49.20    4.00
   5  25  -1   43.20    3.40
  -5  25   1   40.90    3.40
   5  25  -1   44.40    2.90
   5  25  -1   43.30    3.20
  -5  25   1   49.40    3.40
   4 -25  -1   20.20    2.30
  -4  25   1   20.20    2.60
  -4  25   1   17.20    3.00
   4  25  -1   18.30    2.40
   4  25  -1   21.60    3.40
   4  25  -1   19.00    2.10
  -4  25   1   18.40    2.40
   4  25  -1   18.90    2.60
   3 -25  -1   52.79    3.10
  -3  25   1   54.09    3.30
  -3  25   1   52.59    3.80
   3  25  -1   62.09    3.90
   3  25  -1   42.30    4.20
   3  25  -1   50.09    3.30
   3  25  -1   49.90    2.90
  -2 -25   1   25.10    2.40
   2 -25  -1   31.10    2.50
   2  25  -1   31.30    3.70
  -2  25   1   30.40    3.10
  -2  25   1   36.40    2.60
   2  25  -1   27.10    2.60
   2  25  -1   28.60    2.90
   2  25  -1   26.50    2.20
   1 -25  -1  103.09    4.40
  -1 -25   1   89.29    4.20
  -1  25   1   91.09    4.70
   1  25  -1   88.59    4.30
   1  25  -1  112.09    5.00
  -1  25   1  101.89    4.90
   0 -25   1   48.20    3.00
   0 -25  -1   50.99    3.10
   0  25   1   58.59    4.60
   0  25  -1   46.70    3.40
   0  25  -1   51.49    2.80
   0  25   1   51.39    3.20
   0  25   1   50.49    3.60
   1  25   1   20.90    3.30
  -2 -25  -1    7.80    1.80
   2  25   1   10.40    2.70
  -2  25  -1    7.90    2.30
   2  25   1    6.20    1.80
  -2  25  -1    7.90    1.60
   2  25   1    7.80    2.20
   2  25   1    9.10    1.80
   3  25   1   11.60    2.60
  -4 -25  -1   -3.30    1.50
   4  25   1   -0.50    1.50
   4  25   1    0.90    1.60
   4  25   1   -0.80    2.10
  -4  25  -1   -2.80    2.40
  -5 -25  -1  109.99    5.30
   5  25   1  120.69    5.50
   5  25   1  110.99    6.90
   5  25   1  118.29    5.50
  -5  25  -1  108.69    5.30
  -5  25  -1  112.09    5.90
   6 -25   1    0.40    2.50
  -6 -25  -1    2.80    2.00
  -6  25  -1    1.40    2.20
   6  25   1    3.90    1.80
   6  25   1    3.80    2.60
   6  25   1    3.40    2.00
  -6  25  -1   -2.80    2.70
  -7 -25  -1  132.29    6.40
   7 -25   1  141.89    7.60
   7  25   1  145.59    6.70
   7  25   1  145.49    6.50
  -7  25  -1  134.99    6.50
  -7  25  -1  136.49    7.00
  -8 -25  -1    7.00    2.50
   8 -25   1    5.70    3.00
  -8  25  -1    4.40    2.70
   8  25   1    7.50    2.20
   8  25   1    4.90    2.30
  -9 -25  -1   88.39    5.30
   9  25   1   91.99    5.20
   9  25   1   94.79    5.20
  -9  25  -1   82.79    5.20
  10  25   1    0.80    2.30
 -10  25  -1   -3.40    2.80
 -11  25  -1   41.60    4.50
 -12  25  -1   -0.20    3.40
  12  26  -1    1.70    2.80
 -12  26   1    5.10    3.60
  11  26  -1   -1.70    2.40
 -11  26   1    1.20    3.20
 -10  26   1   23.40    3.80
  10  26  -1   21.70    3.40
   9  26  -1    2.90    2.20
  -9  26   1    4.00    2.80
   9  26  -1   -0.20    2.90
   8 -26  -1   29.70    4.50
   8  26  -1   27.00    3.20
   8  26  -1   29.30    4.20
  -8  26   1   29.50    3.70
   7 -26  -1   28.10    4.30
   7  26  -1   28.40    3.20
  -7  26   1   28.70    3.40
  -7  26   1   28.10    3.30
   7  26  -1   29.80    4.00
   6 -26  -1   21.70    3.90
   6  26  -1   18.30    2.80
   6  26  -1   20.00    3.10
   6  26  -1   19.10    2.40
  -6  26   1   20.40    2.90
  -6  26   1   20.50    3.10
   6  26  -1   17.90    3.50
   5 -26  -1  173.68    6.90
   5 -26  -1  166.68    8.60
   5  26  -1  164.08    9.20
  -5  26   1  179.78    7.70
  -5  26   1  181.88    7.20
   5  26  -1  180.38    7.40
   5  26  -1  167.88    7.30
   5  26  -1  169.28    7.00
  -5  26   1  178.68    7.70
   4 -26  -1   26.50    2.60
  -4  26   1   22.60    2.90
  -4  26   1   23.80    3.40
  -4  26   1   27.50    2.70
   4  26  -1   22.30    3.60
   4  26  -1   25.50    2.20
   4  26  -1   28.20    2.90
   4  26  -1   29.40    2.70
   3 -26  -1  364.26   13.00
  -3  26   1  381.46   13.80
   3  26  -1  378.46   13.60
  -3  26   1  375.36   15.10
   3  26  -1  389.66   13.20
   3  26  -1  371.66   17.90
   3  26  -1  389.76   14.90
   2 -26  -1   31.10    2.50
   2  26  -1   27.20    3.60
  -2  26   1   27.80    2.50
   2  26  -1   25.30    2.60
  -2  26   1   32.90    3.20
   2  26  -1   21.70    2.20
   2  26  -1   27.70    3.00
   1 -26  -1  960.60   31.70
   1  26  -1  978.00   44.00
   1  26  -1  969.90   31.90
   1  26  -1  993.20   32.70
  -1  26   1  978.20   32.70
  -1  26   1  987.40   37.80
   1  26  -1 1058.59   37.50
   0 -26  -1   25.60    2.50
   0  26  -1   14.00    1.90
   0  26  -1   24.60    2.90
   0  26   1   23.20    2.40
   0  26   1   21.40    2.90
   0  26   1   22.20    3.70
  -1 -26  -1 1164.88   38.00
  -1  26  -1 1271.27   45.00
  -1  26  -1 1195.18   39.00
   1  26   1 1162.48   45.30
   1  26   1 1183.38   39.00
   1  26   1 1173.38   52.59
  -2 -26  -1    0.10    1.50
   2  26   1    2.30    2.00
   2  26   1    1.30    2.40
   2  26   1    1.30    1.50
  -2  26  -1    3.10    2.10
   2  26   1    3.80    1.70
  -3 -26  -1  510.45   17.30
   3  26   1  529.85   18.10
   3  26   1  500.85   20.20
  -3  26  -1  535.85   18.10
   3  26   1  519.25   23.90
   3  26   1  516.75   17.60
  -4 -26  -1   -0.90    1.70
   4  26   1   -1.50    2.20
  -4  26  -1   -1.20    2.50
   4  26   1    1.00    1.60
   4  26   1    0.10    1.70
  -5 -26  -1  667.43   22.80
   5  26   1  673.43   26.80
   5  26   1  698.73   31.40
  -5  26  -1  712.93   23.10
  -5  26  -1  702.73   23.80
   5  26   1  697.13   23.10
  -6 -26  -1    3.90    2.10
   6 -26   1    2.50    2.50
  -6  26  -1   -0.20    2.20
   6  26   1    4.90    1.90
   6  26   1    3.40    2.00
   6  26   1    5.00    2.70
  -6  26  -1    3.70    2.90
  -7 -26  -1  578.84   19.80
   7 -26   1  552.24   23.70
   7  26   1  578.84   20.00
  -7  26  -1  626.14   20.90
   7  26   1  582.64   22.90
  -7  26  -1  586.44   19.90
  -8 -26  -1   28.10    3.50
   8 -26   1   25.30    4.20
   8  26   1   24.50    3.40
  -8  26  -1   25.90    3.60
   8  26   1   25.50    3.20
  -9  26  -1  146.69    7.10
   9  26   1  146.29    6.90
  10  26   1    4.90    2.60
 -10  26  -1    6.00    3.10
 -11  26  -1   58.19    4.90
 -12  26  -1    8.70    3.60
 -12  27   1    1.90    3.50
  12  27  -1    2.40    2.70
  11  27  -1   -2.10    2.50
 -11  27   1    2.10    3.30
  10  27  -1    0.70    2.40
 -10  27   1    1.50    3.00
   9  27  -1    9.90    3.30
  -9  27   1    9.50    3.10
   9  27  -1   10.70    2.60
   8 -27  -1   11.40    3.60
   8  27  -1    7.30    2.30
   8  27  -1   10.80    3.40
  -8  27   1   11.40    2.90
   7 -27  -1    9.20    3.50
  -7  27   1    7.20    2.60
   7  27  -1    8.70    2.30
  -7  27   1    4.30    2.40
   7  27  -1    6.30    2.90
   6 -27  -1   28.10    4.20
   6  27  -1   25.40    2.60
   6  27  -1   22.60    3.00
   6  27  -1   27.20    3.90
  -6  27   1   27.30    3.10
  -6  27   1   25.20    3.30
   5 -27  -1    0.70    2.50
   5  27  -1    0.30    1.70
   5  27  -1    2.00    2.40
  -5  27   1    1.00    1.80
   5  27  -1   -2.30    1.90
  -5  27   1    1.20    2.10
   5  27  -1    1.90    1.50
   4 -27  -1   54.99    3.40
  -4  27   1   55.29    4.20
   4  27  -1   56.19    4.80
   4  27  -1   57.99    3.20
  -4  27   1   53.09    3.80
   4  27  -1   58.29    3.50
   4  27  -1   61.59    4.20
  -4  27   1   55.59    3.60
   3 -27  -1    3.60    1.60
   3  27  -1    4.20    2.10
  -3  27   1    4.50    1.70
  -3  27   1    3.70    2.30
   3  27  -1    3.10    1.40
   3  27  -1    3.00    1.80
   2 -27  -1  106.89    4.80
   2  27  -1  107.09    5.00
   2  27  -1   95.79    6.50
   2  27  -1  112.39    4.90
   2  27  -1  113.59    5.40
  -2  27   1  105.19    5.40
  -2  27   1  106.59    5.20
   1 -27  -1   33.70    2.80
  -1  27   1   36.40    2.80
   1  27  -1   33.00    3.20
   1  27  -1   36.30    2.40
   1  27  -1   31.00    2.80
   0 -27  -1  127.39    5.40
   0  27  -1  128.69    5.90
   0  27   1  112.99    5.70
   0  27   1  132.19    6.00
   0  27  -1  124.89    5.40
  -1 -27  -1   38.90    3.00
   1  27   1   44.10    3.00
  -1  27  -1   37.20    3.40
   1  27   1   45.40    3.50
   2  27   1   14.10    3.40
  -3 -27  -1   30.00    2.80
   3  27   1   43.00    3.10
   3  27   1   36.00    3.10
   3  27   1   34.80    3.20
  -3  27  -1   36.60    3.50
   4  27   1    8.70    2.70
  -5 -27  -1   11.00    2.20
  -5  27  -1   13.60    3.30
   5  27   1   20.80    2.70
   5  27   1   16.70    2.70
  -5  27  -1   12.20    2.60
   6 -27   1   50.39    4.60
  -6 -27  -1   47.50    3.80
   6  27   1   52.79    3.80
   6  27   1   58.79    3.60
   6  27   1   49.40    4.80
  -6  27  -1   34.90    4.30
  -6  27  -1   45.90    3.90
   7 -27   1   50.19    5.00
  -7 -27  -1   55.49    4.10
  -7  27  -1   53.39    4.20
   7  27   1   51.39    4.10
   7  27   1   57.99    3.80
  -7  27  -1   55.79    5.00
  -8 -27  -1   58.59    4.50
   8  27   1   69.09    4.30
   8  27   1   56.79    4.30
  -8  27  -1   65.09    4.60
  -9  27  -1   24.40    3.80
   9  27   1   16.50    2.90
 -10  27  -1   15.70    3.50
  10  27   1   15.40    3.10
 -11  27  -1   16.50    3.70
 -12  28   1   11.60    3.90
  12  28  -1    9.30    3.10
  11  28  -1   10.60    3.00
 -11  28   1   19.50    3.80
  10  28  -1    8.90    2.80
 -10  28   1    5.70    3.10
  -9  28   1   48.30    4.40
   9  28  -1   47.10    3.90
   9  28  -1   38.30    4.90
  -8  28   1    9.90    3.00
   8  28  -1    6.20    3.10
   8  28  -1    6.70    2.40
   7 -28  -1   33.50    4.60
   7  28  -1   29.00    4.20
  -7  28   1   34.00    3.60
   7  28  -1   24.30    3.10
   6 -28  -1    0.80    2.90
  -6  28   1    1.20    2.30
  -6  28   1    4.20    2.20
   6  28  -1    1.40    2.70
   6  28  -1    0.80    1.90
   5 -28  -1    2.20    2.70
   5  28  -1   -1.10    2.40
  -5  28   1    3.70    2.00
   5  28  -1    2.20    1.80
  -5  28   1   -0.10    2.10
   5  28  -1    1.20    2.10
   4 -28  -1   89.89    4.50
  -4  28   1   81.29    5.20
   4  28  -1   92.09    5.00
   4  28  -1   97.49    4.40
  -4  28   1   92.89    4.80
   4  28  -1   90.79    4.60
   4  28  -1   87.89    6.10
   3 -28  -1    8.00    1.80
   3  28  -1    7.50    2.00
   3  28  -1    6.30    3.00
   3  28  -1    5.50    2.20
  -3  28   1    6.90    1.80
  -3  28   1   10.50    2.70
   3  28  -1    4.40    1.40
   2 -28  -1  496.55   16.90
   2  28  -1  470.15   23.10
  -2  28   1  504.45   19.70
   2  28  -1  505.25   17.60
   2  28  -1  489.15   17.00
  -2  28   1  505.25   17.70
   2  28  -1  542.55   19.50
   1 -28  -1   16.10    2.40
   1  28  -1   10.70    2.60
   1  28  -1   20.20    3.80
  -1  28   1   11.80    2.20
   1  28  -1    9.30    1.90
   1  28  -1    7.70    2.00
  -1  28   1   12.60    2.60
   0 -28  -1  963.30   31.90
   0  28  -1 1016.00   32.90
   0  28   1  991.30   32.90
   0  28   1 1021.50   37.90
   0  28   1  960.70   44.20
  -1 -28  -1   14.50    2.40
   1  28   1   10.60    1.90
   1  28   1   17.00    3.70
   1  28   1   17.10    2.90
  -1  28  -1   14.20    2.70
  -2 -28  -1  554.64   18.60
   2  28   1  557.14   18.80
   2  28   1  564.64   19.30
   2  28   1  550.34   25.60
  -2  28  -1  569.74   19.40
   2  28   1  541.55   21.70
  -3 -28  -1   11.90    2.10
  -3  28  -1   12.50    2.80
   3  28   1   11.60    2.20
   3  28   1   11.10    2.90
   3  28   1   12.10    2.30
  -4 -28  -1  669.73   22.10
  -4  28  -1  705.93   23.10
   4  28   1  660.93   30.40
   4  28   1  663.63   22.30
   4  28   1  643.54   25.80
  -5 -28  -1    0.90    2.00
   5  28   1   -1.10    1.70
  -5  28  -1    1.10    3.00
   5  28   1    2.20    2.60
   5  28   1    1.40    1.70
  -6 -28  -1  653.43   21.80
   6 -28   1  618.44   26.10
   6  28   1  660.33   25.20
   6  28   1  657.93   21.90
   6  28   1  634.34   29.70
  -6  28  -1  650.23   22.60
  -6  28  -1  651.13   21.80
   7 -28   1    7.90    3.30
  -7 -28  -1   11.60    2.70
   7  28   1    7.70    2.40
  -7  28  -1   11.60    2.80
   7  28   1   10.80    2.30
   8  28   1  288.17   12.20
  -8  28  -1  293.97   11.30
   8  28   1  292.57   11.20
  -9  28  -1    9.60    3.10
   9  28   1    8.30    2.60
 -10  28  -1   48.90    4.70
  10  28   1   53.39    4.40
 -11  28  -1   14.90    3.80
 -11  29   1    1.70    3.20
  11  29  -1   -0.50    2.60
 -10  29   1    3.40    3.20
  10  29  -1    3.30    2.50
   9  29  -1   13.40    3.70
  -9  29   1    5.10    3.00
   9  29  -1    8.70    2.60
   8  29  -1    0.10    3.00
  -8  29   1    7.30    3.00
   8  29  -1    4.10    2.30
   7 -29  -1   13.30    3.70
  -7  29   1    9.50    2.80
   7  29  -1   10.40    3.30
   7  29  -1   12.40    2.50
   6 -29  -1    2.40    3.30
   6  29  -1   -0.30    2.70
  -6  29   1   -1.40    2.30
   6  29  -1   -1.00    1.80
  -6  29   1   -4.50    2.00
   5 -29  -1    3.90    3.00
  -5  29   1    6.00    2.10
   5  29  -1    1.70    2.40
   5  29  -1    2.50    1.90
   5  29  -1    0.60    2.60
  -5  29   1    2.60    2.30
   4  29  -1   10.10    2.50
   4  29  -1   12.40    3.10
  -4  29   1    9.90    2.10
   4  29  -1    8.00    2.10
   3 -29  -1   33.00    2.90
   3  29  -1   31.40    3.10
  -3  29   1   37.50    2.90
   3  29  -1   36.90    3.50
   3  29  -1   27.50    4.10
  -3  29   1   38.30    3.60
   2 -29  -1   18.30    2.50
  -2  29   1   20.70    2.40
   2  29  -1   17.30    2.90
  -2  29   1   10.70    2.60
   2  29  -1   12.20    2.10
   1 -29  -1   56.59    3.50
   1  29  -1   60.39    3.80
  -1  29   1   64.89    4.30
   1  29  -1   58.59    4.30
  -1  29   1   64.79    3.70
   0  29  -1   12.50    2.60
  -1 -29  -1   48.50    3.30
  -1  29  -1   49.50    4.10
   1  29   1   44.60    3.80
   1  29   1   48.30    3.20
   1  29   1   46.20    4.70
  -2 -29  -1   40.80    3.10
  -2  29  -1   42.80    3.70
   2  29   1   47.40    3.20
   2  29   1   40.90    3.60
   2  29   1   46.60    3.40
  -3 -29  -1   18.90    2.60
   3  29   1   25.20    3.80
   3  29   1   21.00    2.90
   3  29   1   20.20    2.60
  -3  29  -1   20.10    3.30
  -4 -29  -1   28.60    3.00
   4  29   1   38.20    3.10
  -4  29  -1   29.90    3.80
   4  29   1   31.40    3.20
  -5 -29  -1    2.50    2.00
   5  29   1    0.40    1.90
  -5  29  -1    0.20    3.00
   5  29   1   -0.40    1.80
   5  29   1    3.20    2.80
   6 -29   1   97.89    6.40
  -6 -29  -1   86.09    5.10
   6  29   1   82.19    5.00
  -6  29  -1   89.79    5.30
  -6  29  -1   98.39    5.90
   6  29   1   97.89    5.10
   6  29   1  112.99    6.80
   7 -29   1    3.70    3.10
   7  29   1    1.30    2.00
   7  29   1    2.10    2.20
  -7  29  -1    1.60    2.50
  -8  29  -1   76.19    5.00
   8  29   1   80.69    4.70
   8  29   1   65.39    4.70
   9  29   1    1.70    2.40
  -9  29  -1    1.70    2.90
 -10  29  -1   49.90    4.70
  10  29   1   39.20    4.20
  11  29   1    4.30    3.00
 -11  29  -1    1.20    3.30
 -11  30   1   11.90    3.70
  11  30  -1   13.50    3.10
 -10  30   1    3.20    3.30
  10  30  -1    6.80    2.80
  -9  30   1   17.40    3.50
   9  30  -1   13.40    2.90
   9  30  -1   11.10    3.70
  -8  30   1    1.70    2.80
   8  30  -1    5.20    3.20
   8  30  -1    0.30    2.20
   7 -30  -1   16.70    3.90
   7  30  -1   16.20    3.90
  -7  30   1   17.30    3.20
   7  30  -1   14.90    2.70
   6 -30  -1    2.30    3.40
  -6  30   1    0.50    2.40
   6  30  -1   -0.90    1.90
   6  30  -1   -1.70    2.80
   5 -30  -1  137.79    7.90
  -5  30   1  148.19    6.70
   5  30  -1  138.49    6.30
  -5  30   1  148.99    6.60
   5  30  -1  128.59    8.40
   5  30  -1  150.98    6.90
   4  30  -1    4.80    1.90
  -4  30   1    5.20    2.00
   4  30  -1    1.70    2.30
   4  30  -1    1.00    2.80
   3  30  -1  114.39    5.50
  -3  30   1  121.69    6.10
  -3  30   1  118.49    5.60
   3  30  -1  116.69    5.80
   3  30  -1  104.39    7.20
   2 -30  -1    1.90    1.60
   2  30  -1    0.40    1.70
   2  30  -1    6.00    3.00
  -2  30   1    1.20    1.70
   2  30  -1   -2.40    2.10
  -2  30   1    0.80    2.40
   1 -30  -1   50.29    3.40
   1  30  -1   51.19    3.90
  -1  30   1   52.49    3.30
  -1  30   1   47.80    3.90
   1  30  -1   47.20    3.40
   0 -30  -1    4.80    1.80
   0  30   1    8.10    2.50
   0  30   1    5.30    1.70
   0  30  -1   11.20    2.60
  -1 -30  -1   27.90    2.80
   1  30   1   29.90    2.70
   1  30   1   27.30    3.20
  -1  30  -1   31.80    3.40
   1  30   1   28.10    2.90
   1  30   1   36.50    4.40
  -2 -30  -1   23.50    2.70
   2  30   1   24.50    4.00
  -2  30  -1   25.40    3.60
   2  30   1   20.30    2.50
   2  30   1   23.40    2.90
  -3 -30  -1    2.70    1.80
  -3  30  -1    4.50    2.70
   3  30   1    6.90    3.00
   3  30   1    5.30    2.00
   3  30   1    5.50    1.80
  -4 -30  -1    9.60    2.20
  -4  30  -1   11.30    3.10
   4  30   1   10.80    2.30
   4  30   1   10.60    2.10
   4  30   1   11.20    3.30
  -5 -30  -1   53.19    3.80
   5  30   1   42.80    3.70
  -5  30  -1   51.59    4.60
   5  30   1   47.40    4.90
   5  30   1   50.69    3.60
   6 -30   1   38.20    4.80
   6  30   1   46.70    4.90
  -6  30  -1   57.39    4.90
   6  30   1   45.20    3.60
   6  30   1   45.50    3.80
  -7  30  -1   31.90    3.80
   7  30   1   31.10    3.20
   7  30   1   25.70    3.40
   8  30   1   51.99    3.90
  -8  30  -1   54.59    4.50
   8  30   1   52.39    4.20
   9  30   1    0.70    2.40
  -9  30  -1    4.20    3.10
 -10  30  -1   72.49    5.30
  10  30   1   70.19    5.00
 -11  30  -1    4.60    3.40
  11  30   1    1.80    2.80
  11  31  -1    1.60    2.80
 -11  31   1    4.90    3.50
  10  31  -1    0.00    2.50
 -10  31   1   -0.90    3.10
   9  31  -1    0.80    2.40
  -9  31   1    6.00    3.20
   9  31  -1    3.00    3.40
   8  31  -1    0.30    2.20
  -8  31   1    3.00    2.80
   8  31  -1    1.30    3.10
   7  31  -1    4.40    3.20
  -7  31   1    5.70    2.70
   7  31  -1    6.30    2.40
   6 -31  -1    6.50    3.60
  -6  31   1    7.10    2.80
   6  31  -1    3.40    2.10
   6  31  -1    4.80    3.10
   5 -31  -1    7.10    3.40
  -5  31   1    8.60    2.30
   5  31  -1    5.60    2.10
   4  31  -1    1.60    2.90
  -4  31   1    4.60    2.00
   4  31  -1    9.00    2.60
   4  31  -1    3.70    2.00
   3  31  -1   46.40    3.90
  -3  31   1   49.50    3.40
   3  31  -1   51.49    5.00
   3  31  -1   43.00    3.60
   2  31  -1    2.20    2.90
   2  31  -1    1.00    1.80
  -2  31   1    6.30    2.50
   2  31  -1    3.60    2.40
  -2  31   1    4.20    1.80
   1 -31  -1    7.60    2.00
  -1  31   1   11.70    2.20
  -1  31   1    8.80    2.60
   1  31  -1    7.00    2.00
   1  31  -1    3.20    2.40
   0 -31  -1   31.70    3.00
   0  31   1   32.30    3.50
   0  31   1   30.00    2.80
   0  31  -1   34.60    3.50
  -1 -31  -1   -0.10    1.70
   1  31   1    6.00    3.00
   1  31   1    3.90    1.80
  -1  31  -1    6.40    2.60
   1  31   1    3.40    1.90
  -2 -31  -1   61.79    3.90
  -2  31  -1   67.89    4.60
   2  31   1   62.19    5.50
   2  31   1   69.49    4.20
   2  31   1   66.89    3.90
  -3 -31  -1    5.10    2.00
   3  31   1    4.70    3.10
   3  31   1    7.20    2.30
  -3  31  -1    1.80    2.90
   3  31   1    4.20    1.90
  -4 -31  -1   23.60    3.00
   4  31   1   29.10    4.40
  -4  31  -1   30.90    4.20
   4  31   1   30.00    2.90
   4  31   1   27.90    3.20
   5  31   1    6.80    2.20
  -5  31  -1    6.30    3.20
   5  31   1    5.00    2.20
   5  31   1    9.90    3.30
   6 -31   1   64.09    5.60
   6  31   1   65.09    5.70
   6  31   1   55.59    4.20
   6  31   1   71.19    4.30
   7  31   1   13.40    2.70
  -7  31  -1   12.40    3.10
   7  31   1   15.50    2.90
   8  31   1   34.00    3.80
  -8  31  -1   34.90    3.90
  -9  31  -1   23.60    3.90
   9  31   1   21.30    3.60
  10  31   1   41.00    4.40
 -10  31  -1   60.69    5.00
 -11  31  -1    5.60    3.50
  11  31   1    5.40    3.10
  11  32  -1   -1.30    2.70
 -11  32   1    2.80    3.50
 -10  32   1    7.30    3.50
  10  32  -1    5.80    2.80
   9  32  -1    2.20    2.50
  -9  32   1    1.50    3.00
   9  32  -1    3.70    3.60
   8  32  -1    5.90    2.60
  -8  32   1    4.10    2.90
   8  32  -1    4.50    3.30
   7  32  -1   25.30    3.30
  -7  32   1   23.50    3.60
   7  32  -1   18.70    4.20
   6 -32  -1  131.99    8.00
  -6  32   1  132.09    6.40
   6  32  -1  123.99    8.00
   6  32  -1  124.19    6.10
   5 -32  -1   26.40    5.20
   5  32  -1   27.00    3.10
   5  32  -1   27.80    4.30
  -4  32   1  124.59    5.80
   4  32  -1  101.19    7.40
   4  32  -1  118.79    5.60
   4  32  -1  124.89    6.20
   3  32  -1   39.10    4.70
   3  32  -1   36.40    3.40
   3  32  -1   37.10    3.70
  -3  32   1   40.30    3.10
   2  32  -1   43.70    5.00
  -2  32   1   58.29    3.50
   2  32  -1   48.90    4.30
   2  32  -1   56.49    3.80
   1  32  -1    7.00    2.10
   1  32  -1    8.70    2.70
  -1  32   1    8.60    1.90
   0  32  -1  202.38    8.20
   0  32  -1  214.08    8.90
   0  32   1  212.58    9.00
  -1  32  -1    3.80    2.60
   1  32   1    2.10    1.90
   1  32   1    1.80    3.10
   1  32   1    4.10    1.80
  -2  32  -1  225.88    9.30
   2  32   1  220.88    9.20
   2  32   1  221.78    8.70
   2  32   1  199.68   11.50
  -3  32  -1    5.10    2.90
   3  32   1    5.30    1.90
   3  32   1    5.50    3.20
   3  32   1    3.70    2.20
   4  32   1  178.38    7.80
  -4  32  -1  187.88    8.20
   4  32   1  159.38    9.70
   4  32   1  165.88    7.40
   5  32   1    6.80    2.20
   5  32   1    6.20    2.30
   5  32   1    7.60    3.40
  -5  32  -1    3.10    3.20
   6 -32   1  141.39    8.30
   6  32   1  143.99    6.70
   6  32   1  146.19    6.90
   7  32   1   17.70    3.00
   7  32   1   14.90    3.00
  -8  32  -1   39.70    4.20
   8  32   1   39.50    4.00
  -9  32  -1   55.89    4.70
   9  32   1   52.09    4.50
 -10  32  -1   70.59    5.40
  10  32   1   62.49    5.00
 -11  33   1    0.70    3.40
  11  33  -1    0.20    2.80
 -10  33   1    4.10    3.50
  10  33  -1    1.90    2.80
  -9  33   1    1.90    3.10
   9  33  -1    2.10    3.60
   9  33  -1    6.20    2.60
   8  33  -1    6.00    2.50
  -8  33   1    5.40    3.10
   8  33  -1    3.80    3.40
  -7  33   1   13.40    3.20
   7  33  -1   18.40    3.10
   7  33  -1   20.10    4.40
   6 -33  -1    2.60    3.70
   6  33  -1    1.10    2.10
   5 -33  -1   54.39    5.80
   5  33  -1   54.59    4.00
   5  33  -1   59.89    5.50
   4  33  -1   30.50    3.30
   4  33  -1   55.29    5.30
  -4  33   1   38.40    3.30
   3  33  -1   70.69    4.40
   3  33  -1   68.29    4.70
   3  33  -1   65.89    5.80
  -3  33   1   71.79    4.10
  -2  33   1   28.80    2.90
   2  33  -1   35.80    4.60
   2  33  -1   28.30    3.20
   2  33  -1   28.90    3.60
   1  33  -1   32.20    3.60
  -1  33   1   30.10    2.90
   1  33  -1   33.70    3.20
   0  33  -1   13.60    3.00
   0  33  -1   12.70    2.30
   0  33   1   14.40    2.40
  -1  33  -1   32.30    3.70
   1  33   1   28.20    2.80
   2  33   1   12.10    2.40
  -2  33  -1    7.20    2.90
   2  33   1   11.10    2.50
   3  33   1   18.60    4.40
  -4  33  -1   11.60    3.50
   4  33   1   13.20    2.60
   4  33   1   12.50    2.30
  -5  33  -1   39.50    4.70
   5  33   1   28.60    4.80
   5  33   1   38.80    3.40
   5  33   1   32.90    3.60
   6  33   1    3.10    2.30
   6  33   1    2.00    2.30
   7  33   1   36.90    3.80
  -8  33  -1    3.10    2.90
   8  33   1    0.40    2.40
   9  33   1   73.19    5.10
  -9  33  -1   66.49    5.30
 -10  33  -1    8.70    3.40
  10  33   1    3.50    3.00
  10  34  -1   27.50    3.90
 -10  34   1   28.20    4.40
   9  34  -1   -0.20    2.50
  -9  34   1    6.40    3.30
   9  34  -1   -0.10    3.40
  -8  34   1   24.00    3.80
   8  34  -1   18.60    4.30
   8  34  -1   15.60    3.00
  -7  34   1    9.30    3.10
   7  34  -1    6.40    2.50
   7  34  -1    9.10    3.80
   6  34  -1   18.90    3.20
   6  34  -1   12.80    3.90
   5 -34  -1  178.08    9.30
   5  34  -1  146.89    9.40
   5  34  -1  156.98    7.10
   4  34  -1   49.30    3.70
   4  34  -1   45.50    5.20
   3  34  -1  185.38   11.30
  -3  34   1  217.48    9.10
   3  34  -1  218.58    8.60
   3  34  -1  221.68    9.20
   2  34  -1   23.60    3.10
   2  34  -1   29.80    3.90
   2  34  -1   24.10    4.70
  -2  34   1   22.70    2.70
  -1  34   1  201.88    8.60
   1  34  -1  191.48    8.60
   1  34  -1  198.48    8.10
   0  34  -1    4.20    2.70
   0  34  -1    4.20    2.00
   0  34   1    2.90    1.80
   1  34   1  496.45   19.30
   1  34   1  484.35   17.10
  -1  34  -1  492.35   17.80
  -2  34  -1    3.90    3.00
   2  34   1    4.70    3.40
   2  34   1    3.40    2.30
   2  34   1    2.20    1.80
   3  34   1  757.02   24.30
   3  34   1  618.64   32.80
   3  34   1  744.03   27.90
  -3  34  -1  761.02   25.10
  -4  34  -1    4.20    3.20
   4  34   1    2.40    2.00
   4  34   1    4.90    3.50
   4  34   1    0.30    2.20
   5  34   1  381.96   20.60
   5  34   1  456.15   17.20
   5  34   1  440.46   15.40
   6  34   1    1.70    2.10
   6  34   1   -3.40    2.10
   7  34   1  143.69    6.90
   8  34   1   11.50    3.00
  -9  34  -1  146.19    7.30
   9  34   1  127.09    7.00
 -10  34  -1   17.10    3.80
  10  34   1   10.20    3.20
  10  35  -1    1.90    2.80
 -10  35   1    0.80    3.40
   9  35  -1    5.10    2.60
  -9  35   1   -1.30    3.00
   8  35  -1    7.60    3.90
   8  35  -1    7.60    2.80
  -8  35   1    7.50    3.20
   7  35  -1    3.80    3.60
   7  35  -1    2.80    2.40
   6  35  -1   28.60    3.50
   6  35  -1   31.30    4.80
   5  35  -1    4.80    2.30
   4  35  -1   93.29    6.90
   4  35  -1   89.89    5.10
   3  35  -1   10.10    2.40
   2  35  -1   52.09    5.70
   2  35  -1   64.39    4.10
   2  35  -1   61.19    4.60
  -2  35   1   65.19    3.80
   1  35  -1    8.80    2.40
   1  35  -1   10.40    3.00
  -1  35   1    9.30    2.00
   0  35  -1   27.30    3.10
   0  35  -1   29.20    3.80
   0  35   1   25.90    2.80
   1  35   1   22.10    2.70
   1  35   1   20.40    3.10
  -1  35  -1   14.40    3.20
  -2  35  -1   34.70    4.20
   2  35   1   29.80    2.90
  -3  35  -1   49.10    4.90
   3  35   1   40.30    3.80
   3  35   1   43.60    3.40
   4  35   1   12.60    3.80
   5  35   1   33.80    3.30
   5  35   1   27.30    3.50
   6  35   1    0.00    2.20
   7  35   1   22.50    3.50
   8  35   1   16.60    3.20
   9  35   1   13.80    3.20
  10  35   1   16.00    3.40
 -10  35  -1   16.40    3.90
  10  36  -1   21.20    3.60
 -10  36   1   23.00    4.10
   9  36  -1   10.40    3.00
  -9  36   1   10.30    3.60
   8  36  -1    2.20    2.60
  -8  36   1    4.40    3.20
   8  36  -1    3.00    3.70
   7  36  -1   10.40    2.70
   7  36  -1    7.50    4.00
   6  36  -1   -0.50    2.30
   6  36  -1    5.40    3.70
   5  36  -1   10.90    4.00
   5  36  -1   12.40    2.70
   4  36  -1   61.89    5.80
   4  36  -1   44.70    3.90
   3  36  -1    6.70    3.70
   3  36  -1   14.10    2.60
   2  36  -1   95.79    5.10
   2  36  -1   95.89    5.70
   2  36  -1   91.69    7.20
   1  36  -1    4.80    3.00
   1  36  -1    4.60    2.20
   0  36  -1  113.39    5.60
   0  36  -1  105.29    6.10
   0  36   1  112.89    5.50
  -1  36  -1    8.60    3.20
   1  36   1    7.40    4.00
   1  36   1    5.80    2.00
   1  36   1    5.00    2.40
  -2  36  -1  403.96   15.10
   2  36   1  400.16   15.90
   2  36   1  378.06   14.20
   3  36   1   29.10    4.90
   3  36   1   20.30    2.70
   3  36   1   16.60    3.00
  -3  36  -1   32.10    4.20
   4  36   1  544.65   16.90
   4  36   1  398.76   22.30
   5  36   1   13.80    2.80
   6  36   1   92.09    5.40
   7  36   1   12.10    2.90
   8  36   1   88.49    5.60
   9  36   1    0.40    2.70
  -9  37   1    1.60    3.40
   9  37  -1    0.30    2.60
   8  37  -1   -1.60    2.50
   8  37  -1   -4.90    3.40
   7  37  -1    6.40    3.90
   7  37  -1    4.60    2.60
   6  37  -1   -1.20    3.50
   6  37  -1   -1.90    2.30
   5  37  -1   25.40    5.00
   5  37  -1   26.30    3.30
   4  37  -1   24.40    4.70
   3  37  -1   24.80    4.70
   3  37  -1   28.80    3.30
   2  37  -1    2.00    2.20
   1  37  -1   16.50    3.50
   1  37  -1   15.40    2.70
   0  37  -1    1.60    2.10
   0  37  -1    3.80    2.90
   1  37   1   19.60    3.10
  -1  37  -1   17.10    3.50
  -2  37  -1   13.20    3.40
   2  37   1    8.30    2.50
   3  37   1   25.20    3.60
   3  37   1   25.00    5.00
   4  37   1   36.60    3.80
   5  37   1    9.30    2.70
   6  37   1   16.80    3.00
   7  37   1    2.10    2.60
   8  37   1   27.80    4.00
   9  37   1    1.90    2.90
   9  38  -1   22.40    3.80
   8  38  -1    0.90    2.60
   8  38  -1   -0.80    3.90
   7  38  -1   15.80    3.10
   7  38  -1    8.40    4.00
   6  38  -1   -0.60    3.80
   6  38  -1    0.30    2.40
   5  38  -1   12.00    2.70
   5  38  -1   17.80    4.40
   4  38  -1    2.50    3.80
   4  38  -1    2.70    2.30
   3  38  -1   21.40    4.60
   3  38  -1    1.10    2.20
   2  38  -1    2.90    2.20
   1  38  -1    2.10    2.30
   0  38  -1    2.10    2.20
   1  38   1   21.70    3.40
   2  38   1   10.70    2.80
   2  38   1    8.50    4.20
   3  38   1   21.50    5.00
   3  38   1   19.40    3.10
   4  38   1   25.70    3.70
   4  38   1   34.00    5.30
   5  38   1    1.90    2.40
   6  38   1   15.60    3.10
   7  38   1   -0.30    2.50
   8  38   1   30.00    4.10
   9  38   1   -3.30    2.70
   9  39  -1    2.20    2.80
   8  39  -1   -1.80    2.50
   8  39  -1   -1.60    3.90
   7  39  -1    4.30    2.70
   7  39  -1    5.30    4.00
   6  39  -1    2.50    3.90
   6  39  -1   -0.10    2.40
   5  39  -1   14.00    4.40
   5  39  -1   12.40    2.80
   4  39  -1    8.20    2.50
   4  39  -1    5.40    4.00
   3  39  -1   22.40    3.30
   3  39  -1   11.40    4.10
   2  39  -1    5.70    2.40
   1  39  -1    6.80    2.40
   0  39   1    3.30    2.40
   0  39  -1    4.00    2.40
   1  39   1   11.00    2.80
   2  39   1   14.30    2.90
   2  39   1    6.10    4.10
   3  39   1    3.20    3.90
   3  39   1    1.60    2.50
   4  39   1   28.20    3.80
   4  39   1   27.30    5.20
   5  39   1    4.40    2.60
   6  39   1   15.80    3.10
   7  39   1    1.60    2.70
   8  39   1   21.90    3.70
   8  40  -1   13.80    4.70
   8  40  -1   11.60    3.20
   7  40  -1   13.80    4.60
   7  40  -1   23.60    3.70
   6  40  -1   25.10    3.60
   6  40  -1   16.80    4.70
   5  40  -1   21.20    5.10
   5  40  -1   20.90    3.40
   4  40  -1   51.19    6.00
   3  40  -1   24.40    5.40
   3  40  -1   23.40    3.40
   2  40  -1  118.89    6.20
   1  40  -1    8.60    2.60
   0  40   1   67.19    4.70
   0  40  -1   79.29    4.80
  -1  40  -1    9.20    2.50
   1  40   1   10.80    2.80
   2  40   1   67.29    6.90
   3  40   1    3.50    2.60
   3  40   1   -0.80    3.80
   4  40   1  117.99    6.40
   5  40   1    8.50    3.00
   6  40   1   29.30    4.00
   7  40   1    7.90    3.00
   8  40   1   42.00    4.60
   8  41  -1    1.20    2.80
   7  41  -1   25.50    3.70
   7  41  -1   29.00    5.50
   6  41  -1   15.10    3.10
   6  41  -1   23.80    5.20
   5  41  -1   25.90    5.30
   5  41  -1   25.80    3.60
   4  41  -1   34.60    3.90
   3  41  -1   37.50    6.00
   3  41  -1   55.89    4.30
   2  41  -1   21.50    3.40
   1  41  -1   26.70    3.60
   0  41   1   22.20    3.50
   0  41  -1   25.00    3.60
   1  41   1   26.20    3.80
  -1  41  -1   27.10    3.50
   2  41   1   10.70    2.90
   3  41   1   15.50    3.10
   3  41   1    6.60    4.40
   4  41   1    2.00    2.60
   5  41   1   25.70    4.00
   6  41   1   -0.40    2.60
   7  41   1   27.30    4.10
   8  41   1   -0.30    2.90
   8  42  -1   30.00    4.20
   7  42  -1    5.30    2.90
   7  42  -1   10.60    4.70
   6  42  -1   39.80    4.20
   6  42  -1   26.90    5.50
   5  42  -1   20.10    3.30
   5  42  -1   24.40    5.40
   4  42  -1   33.30    5.60
   4  42  -1   26.00    3.80
   3  42  -1   87.19    7.90
   2  42  -1   11.80    2.80
   1  42  -1  195.48    8.40
   0  42  -1    8.90    2.80
   0  42   1    8.40    2.90
   1  42   1  257.07   10.40
  -1  42  -1  249.38   10.20
   2  42   1    3.20    4.50
   2  42   1    3.40    2.70
   3  42   1  116.59    8.70
   4  42   1   -0.50    2.60
   5  42   1  178.18    8.40
   6  42   1   -1.20    2.80
   7  42   1  119.49    6.80
   7  43  -1    0.40    2.70
   6  43  -1   23.10    3.90
   6  43  -1   38.30    5.90
   5  43  -1   12.10    4.40
   5  43  -1    6.50    2.90
   4  43  -1   39.20    6.00
   4  43  -1   46.10    4.30
   3  43  -1   15.40    3.20
   2  43  -1   26.70    3.70
   1  43  -1   12.20    3.00
   0  43   1   43.20    4.40
   0  43  -1   47.40    4.30
  -1  43  -1    5.10    2.70
   1  43   1    0.70    2.70
   2  43   1   18.30    3.40
   3  43   1   12.80    3.20
   4  43   1    5.90    2.90
   5  43   1   27.50    4.10
   6  43   1    0.50    2.90
   7  43   1    8.40    3.20
   7  44  -1   -0.50    2.70
   6  44  -1   -0.80    2.60
   5  44  -1    4.20    4.60
   5  44  -1    8.20    3.00
   4  44  -1   36.40    5.90
   4  44  -1    6.40    2.90
   3  44  -1    3.20    2.70
   2  44  -1   17.90    3.30
   1  44  -1    5.00    2.80
   0  44   1  134.89    7.10
   0  44  -1  144.79    7.00
  -1  44  -1    1.80    2.70
   1  44   1    4.10    2.80
   2  44   1  181.28    8.50
  -2  44  -1  185.08    8.20
   3  44   1    8.80    3.10
   4  44   1  116.39    6.60
   5  44   1   17.00    3.60
   6  44   1   71.59    5.50
   6  45  -1    0.20    2.70
   5  45  -1    9.50    4.90
   5  45  -1    8.40    3.00
   4  45  -1    2.80    4.50
   4  45  -1   -0.50    2.60
   3  45  -1    6.40    2.80
   2  45  -1   -4.10    2.50
  -1  45   1   11.90    3.10
   1  45  -1   16.50    3.20
   0  45  -1    6.20    2.90
   0  45   1    2.90    2.90
  -1  45  -1    6.80    2.80
   1  45   1    6.60    3.00
   2  45   1    3.80    2.80
  -2  45  -1    6.80    2.70
   3  45   1    9.20    3.20
   4  45   1    7.80    3.00
   5  45   1   12.20    3.30
   6  45   1   16.80    3.60
   5  46  -1    2.80    2.80
   4  46  -1   -4.20    4.50
   4  46  -1    1.10    2.70
   3  46  -1   28.70    3.90
   2  46  -1    4.50    2.90
   1  46  -1    8.70    3.00
  -1  46   1    9.50    3.00
   0  46  -1    7.50    2.90
   0  46   1   13.10    3.30
  -1  46  -1    3.90    2.70
   1  46   1    5.80    3.00
  -2  46  -1    3.10    2.70
   2  46   1    6.30    3.00
   3  46   1   -5.80    2.60
   4  46   1   11.00    3.20
   5  46   1    2.30    3.00
   5  47  -1    4.90    3.00
   4  47  -1   -1.00    2.60
   3  47  -1    2.70    2.80
   2  47  -1    2.70    2.60
   1  47  -1   17.20    3.40
  -1  47   1   17.70    3.50
   0  47   1    5.90    3.00
   0  47  -1   11.10    3.10
  -1  47  -1    5.60    3.00
   1  47   1    7.20    3.10
   2  47   1    1.80    2.90
  -2  47  -1    0.90    2.70
   3  47   1   -1.10    2.80
   4  47   1    9.60    3.30
   4  48  -1   20.10    3.60
   3  48  -1   10.90    3.10
   2  48  -1   71.39    5.20
  -1  48   1   12.10    3.40
   1  48  -1   10.60    3.20
   0  48  -1  106.39    6.20
   0  48   1  109.19    6.50
  -1  48  -1    3.70    3.00
   1  48   1    7.50    3.30
  -2  48  -1   56.49    4.90
   2  48   1   55.49    5.10
  -3  48  -1   -4.40    2.60
   3  48   1   -2.50    2.80
   3  49  -1   18.60    3.50
   2  49  -1   10.00    3.20
  -2  49   1   14.20    3.50
  -1  49   1   26.90    4.30
   1  49  -1   20.60    3.60
   0  49  -1   28.70    4.20
   0  49   1   19.80    3.80
  -1  49  -1   14.10    3.30
   1  49   1   18.30    3.70
   2  49   1    8.50    3.30
  -2  49  -1    9.60    3.20
  -1  50   1  103.39    6.60
   1  50  -1  112.39    6.40
   0  50   1   10.20    3.50
   0  50  -1   12.00    3.40
  -1  50  -1  150.18    7.60
   1  50   1  150.28    7.90
  14   0  -2   31.20    3.90
  13   0  -2   -1.50    2.30
  12   0  -2   81.69    4.80
  12   0  -2   80.59    4.70
 -11   0   2    1.20    2.80
  11   0  -2   -2.00    1.80
 -11   0   2   -2.00    2.30
  11   0  -2    1.90    2.00
 -10   0   2  170.48    6.90
  10   0  -2  158.98    7.10
 -10   0   2  147.59    7.80
  10   0  -2  164.78    6.60
   9   0  -2    2.10    1.60
   9   0  -2    1.80    1.60
   9   0  -2   -0.40    3.00
  -9   0   2   -1.00    2.00
  -9   0   2   -2.80    2.30
  -8   0   2  453.05   18.00
   8   0  -2  443.06   17.60
   8   0  -2  452.25   15.40
   8   0  -2  442.06   15.00
  -8   0   2  468.25   15.20
   7   0  -2    1.00    2.90
  -7   0   2   -2.80    1.20
   7   0  -2   -0.40    1.10
   7   0  -2   -0.50    1.00
   7   0  -2   -0.80    1.30
  -7   0   2   -1.50    1.60
  -7   0   2   -2.60    1.70
   6   0  -2  173.78    6.40
   6   0  -2  174.08    7.30
   6   0  -2  187.78    6.70
  -6   0   2  181.18    7.60
  -6   0   2  189.58    6.60
  -6   0   2  187.38    6.90
   5   0  -2   -0.50    0.70
   5   0  -2   -0.10    1.00
  -5   0   2   -0.30    1.00
   5   0  -2    0.80    0.80
  -5   0   2    0.90    0.90
   4   0  -2  163.08    5.60
  -4   0   2  160.58    5.50
   4   0  -2  165.78    5.40
  -4   0   2  144.69    6.40
   4   0  -2  153.78    6.20
   3   0  -2   -0.50    0.40
  -2   0   2  294.47   11.60
   2   0  -2  324.87    9.80
  -2   0   2  300.27   11.60
   1   0  -2   -6.10    0.50
   1   0  -2   -7.50    0.50
  -1   0  -2   -1.90    0.40
  -2   0  -2  328.97   10.30
   2   0   2  317.27   12.40
  -2   0  -2  329.47   10.60
  -3   0  -2   -0.90    1.00
  -3   0  -2   -0.30    0.70
   3   0   2   -0.90    0.60
   4   0   2 1316.67   50.29
  -4   0  -2 1326.07   41.80
  -4   0  -2 1368.26   42.70
   4   0   2 1340.57   41.80
  -5   0  -2   -1.30    1.10
  -5   0  -2   -1.60    1.40
   5   0   2   -1.40    0.90
   5   0   2   -1.60    1.00
  -6   0  -2 1820.52   58.09
   6   0   2 1868.81   58.19
  -6   0  -2 1932.21   59.39
   6   0   2 1812.42   69.89
  -7   0  -2   -3.30    2.00
   7   0   2   -1.70    1.30
   7   0   2   -0.60    1.30
  -7   0  -2   -3.40    1.50
   8   0   2  537.15   21.80
  -8   0  -2  588.64   19.30
  -8   0  -2  556.34   18.60
  -9   0  -2   -5.00    2.00
   9   0   2   -1.50    1.60
  -9   0  -2   -4.30    2.80
  10   0   2  212.38    9.20
 -10   0  -2  209.38    8.40
 -11   0  -2   -6.70    2.50
 -12   0  -2  132.79    6.70
 -13   0  -2   -4.30    3.20
  14  -1  -2   58.79    4.60
  14   1  -2   55.19    4.50
  13  -1  -2   13.50    2.90
  13   1  -2   17.50    3.00
  12  -1  -2   85.19    4.90
  12  -1  -2   97.39    5.20
  12   1  -2   86.09    5.00
  12   1  -2   90.69    5.10
  11  -1  -2   11.50    2.30
 -11  -1   2    6.60    2.70
  11  -1  -2   10.80    2.30
 -11  -1   2   12.80    3.40
  11   1  -2   13.10    2.60
  11   1  -2    8.20    2.20
 -11   1   2    8.70    2.60
 -11   1   2    7.30    3.00
  10  -1  -2   87.19    4.40
 -10  -1   2   82.59    5.30
  10  -1  -2   81.49    4.30
 -10  -1   2   93.99    4.70
 -10   1   2   86.69    4.70
  10   1  -2   76.09    4.20
  10   1  -2   81.09    4.30
 -10   1   2   80.59    5.40
  -9  -1   2   43.80    3.40
   9  -1  -2   39.90    3.00
  -9  -1   2   39.50    3.70
   9  -1  -2   44.60    2.90
   9  -1  -2   26.30    4.50
   9   1  -2   42.00    2.90
   9   1  -2   48.70    2.90
  -9   1   2   37.70    3.70
  -9   1   2   44.60    3.40
   8  -1  -2  154.48    6.40
   8  -1  -2  131.49    9.00
   8  -1  -2  150.38    5.90
  -8  -1   2  155.38    6.10
   8  -1  -2  136.49    6.00
  -8  -1   2  153.98    6.90
   8   1  -2  156.38    6.50
  -8   1   2  150.58    7.00
   8   1  -2  147.89    6.10
   8   1  -2  154.88    5.90
  -8   1   2  153.58    6.10
  -7  -1   2   28.50    2.30
   7  -1  -2   32.60    2.20
  -7  -1   2   26.60    2.70
   7  -1  -2   27.40    2.30
  -7  -1   2   30.70    2.60
   7  -1  -2   30.10    2.10
  -7   1   2   22.00    2.60
   7   1  -2   22.80    3.40
  -7   1   2   29.60    2.40
   7   1  -2   30.60    2.30
   7   1  -2   31.90    2.20
   7   1  -2   30.90    2.10
  -7   1   2   30.60    2.60
   6  -1  -2   27.80    1.90
  -6  -1   2   30.00    2.20
   6  -1  -2   25.00    1.80
  -6  -1   2   26.10    2.30
   6  -1  -2   24.90    2.00
  -6  -1   2   26.70    2.00
  -6   1   2   27.10    2.10
   6   1  -2   26.20    1.80
   6   1  -2   25.40    1.90
   6   1  -2   20.90    3.00
  -6   1   2   26.90    2.20
  -6   1   2   23.20    2.20
   6   1  -2   25.80    2.00
  -5  -1   2    2.70    1.00
   5  -1  -2    3.30    1.00
  -5  -1   2    4.60    1.20
   5  -1  -2    1.90    0.80
   5  -1  -2    4.50    0.90
   5   1  -2    2.70    0.80
  -5   1   2    3.00    1.00
   5   1  -2    1.00    1.90
   5   1  -2    4.90    1.00
   5   1  -2    4.00    1.10
  -5   1   2    4.10    1.20
   4  -1  -2   13.70    1.30
   4  -1  -2   13.60    1.20
   4  -1  -2   13.90    1.10
  -4  -1   2   13.00    1.40
  -4  -1   2   13.60    1.20
  -4   1   2   14.80    1.50
  -4   1   2   12.20    1.30
   4   1  -2   10.10    2.10
   4   1  -2   13.00    1.30
   4   1  -2   12.40    1.00
   4   1  -2   14.60    1.20
   3  -1  -2   -0.30    0.60
   3  -1  -2   -0.60    0.70
   3  -1  -2    0.40    0.60
  -3  -1   2   -0.50    0.60
   3  -1  -2    0.50    0.40
   3   1  -2   -0.10    0.60
   3   1  -2   -1.20    0.60
  -3   1   2   -0.80    0.70
   3   1  -2   -0.80    0.50
   3   1  -2   -0.30    0.90
   3   1  -2   -0.20    0.40
   2  -1  -2   10.30    0.70
  -2   1   2    9.00    0.50
  -2   1   2    9.70    0.70
   2   1  -2    8.50    0.60
   1  -1  -2    5.10    0.50
  -1  -1  -2    3.00    0.50
  -1   1  -2    3.10    0.40
  -2  -1  -2    2.20    0.80
  -2  -1  -2    0.40    0.60
   2   1   2    1.50    0.50
  -2   1  -2    2.50    0.80
  -2   1  -2    1.90    0.60
   3  -1   2    0.10    0.70
  -3  -1  -2   -0.10    0.90
  -3  -1  -2    0.40    0.70
  -3   1  -2    0.20    0.90
   3   1   2   -0.60    0.60
  -3   1  -2    0.00    0.70
  -4  -1  -2   29.30    1.70
   4  -1   2   29.10    1.70
   4  -1   2   28.10    1.90
  -4  -1  -2   26.90    1.80
  -4  -1  -2   28.10    2.10
  -4   1  -2   28.40    1.80
   4   1   2   27.40    1.80
  -4   1  -2   26.60    2.00
   4   1   2   27.20    1.70
  -5  -1  -2    6.00    1.40
  -5  -1  -2    8.20    1.70
   5  -1   2    6.00    1.20
   5  -1   2    7.20    1.30
   5   1   2    8.80    1.40
  -5   1  -2    5.00    1.70
  -5   1  -2    5.40    1.30
   5   1   2   10.20    1.50
   6  -1   2  168.18    7.10
  -6  -1  -2  166.18    6.30
  -6  -1  -2  176.88    6.80
   6  -1   2  167.08    6.20
   6   1   2  174.58    7.10
   6   1   2  169.98    6.20
  -6   1  -2  159.98    6.20
  -6   1  -2  172.28    6.70
   6   1   2  152.68    9.20
  -7  -1  -2    2.20    1.70
  -7  -1  -2   -0.10    2.00
   7  -1   2    4.00    1.40
   7  -1   2    4.30    1.50
  -7   1  -2   -0.60    1.60
  -7   1  -2   -0.30    2.10
   7   1   2    4.00    1.40
   7   1   2    4.60    1.50
  -8  -1  -2  120.29    5.60
   8  -1   2  119.19    5.40
  -8  -1  -2  103.89    5.10
  -8   1  -2  109.09    5.10
  -8   1  -2  111.49    5.60
   8   1   2  115.49    5.30
   9  -1   2    1.90    1.70
  -9  -1  -2   -2.70    2.60
  -9  -1  -2   -3.20    2.00
  -9   1  -2    0.80    2.10
  -9   1  -2    0.00    2.70
   9   1   2    2.40    1.70
 -10  -1  -2   84.79    4.90
  10  -1   2   89.69    4.80
  10   1   2   89.49    4.70
 -10   1  -2   90.29    5.00
 -11  -1  -2    0.00    2.60
 -11   1  -2    0.20    2.60
 -12  -1  -2   96.19    5.60
 -12   1  -2   89.29    5.40
 -13  -1  -2   -0.80    3.20
 -13   1  -2   -1.60    3.20
  14   2  -2   89.19    5.50
  13  -2  -2   14.40    2.90
  13   2  -2   18.50    3.10
  12  -2  -2   84.09    4.80
  12  -2  -2   87.69    5.00
  12   2  -2   81.49    4.80
  12   2  -2   84.99    4.90
 -11  -2   2   35.00    4.30
  11  -2  -2   35.20    3.20
  11  -2  -2   25.90    3.00
  11   2  -2   33.50    3.10
 -11   2   2   29.20    3.50
  11   2  -2   34.20    3.10
 -11   2   2   26.10    4.00
  10  -2  -2   48.00    3.40
  10  -2  -2   52.89    3.40
 -10  -2   2   50.59    3.70
 -10  -2   2   43.20    4.10
 -10   2   2   51.69    3.80
  10   2  -2   51.49    3.30
 -10   2   2   44.50    4.20
  10   2  -2   47.70    4.80
  10   2  -2   49.40    3.30
   9  -2  -2  154.08    6.10
  -9  -2   2  147.49    7.20
  -9  -2   2  155.98    6.40
   9  -2  -2  145.19    6.60
   9   2  -2  149.29    6.00
   9   2  -2  147.09    6.50
  -9   2   2  147.79    7.20
  -9   2   2  147.29    6.20
  -8  -2   2   46.80    3.40
   8  -2  -2   49.40    3.00
   8  -2  -2   50.49    2.90
   8  -2  -2   46.70    3.10
  -8  -2   2   46.00    3.10
  -8   2   2   49.20    3.10
  -8   2   2   45.60    3.50
   8   2  -2   50.79    3.20
   8   2  -2   48.60    2.90
   8   2  -2   46.30    2.80
   7  -2  -2  160.78    6.90
  -7  -2   2  171.88    6.60
   7  -2  -2  170.18    6.20
  -7  -2   2  173.28    6.30
  -7  -2   2  161.78    7.30
   7  -2  -2  159.78    6.30
  -7   2   2  168.38    6.70
   7   2  -2  159.08    6.90
  -7   2   2  174.18    6.30
   7   2  -2  162.48    6.10
   7   2  -2  168.28    6.40
  -6  -2   2    3.50    1.20
   6  -2  -2    6.60    1.20
  -6  -2   2    3.20    1.30
   6  -2  -2    5.40    1.30
   6  -2  -2    4.40    1.10
  -6   2   2    4.50    1.60
   6   2  -2    5.90    1.30
   6   2  -2    4.20    1.10
  -6   2   2    5.60    1.30
   6   2  -2    1.30    1.90
  -6   2   2    5.90    1.40
   6   2  -2    3.70    1.00
  -5  -2   2   54.49    2.50
  -5  -2   2   54.19    2.80
   5  -2  -2   57.09    2.50
   5  -2  -2   52.29    2.50
   5  -2  -2   55.99    2.60
   5   2  -2   56.99    2.60
  -5   2   2   55.89    2.90
   5   2  -2   49.00    2.50
  -5   2   2   54.59    2.60
   5   2  -2   53.89    2.50
  -4  -2   2    6.40    1.10
   4  -2  -2    8.10    1.10
   4  -2  -2    8.60    1.10
   4  -2  -2    5.70    0.90
   4   2  -2    4.20    0.80
  -4   2   2    6.30    1.00
   4   2  -2    7.20    0.90
   4   2  -2    5.70    1.10
  -4   2   2    8.10    1.30
   4   2  -2    3.50    1.50
   4   2  -2    6.80    1.10
   3  -2  -2   41.70    1.70
   3  -2  -2   36.00    1.70
   3  -2  -2   46.00    1.80
   3  -2  -2   35.30    1.90
  -3  -2   2   38.70    1.90
   3   2  -2   40.10    1.80
   3   2  -2   38.00    1.80
   3   2  -2   42.30    1.70
  -3   2   2   39.30    2.00
   3   2  -2   35.40    1.70
   3   2  -2   35.90    2.30
   2  -2  -2   -0.10    0.40
   2   2  -2   -0.50    0.30
  -2   2   2    0.10    0.20
  -2   2   2    0.20    0.40
   2   2  -2    0.30    0.50
   1  -2  -2  124.69    5.50
   0  -2  -2    0.50    0.30
  -1  -2  -2  227.08    7.00
  -1   2  -2  212.98    6.90
  -2  -2  -2    2.40    0.80
  -2  -2  -2    1.80    0.60
  -2   2  -2    2.40    0.70
   2   2   2    1.00    0.50
   2   2   2   -0.60    1.00
  -2   2  -2    2.40    0.80
   3  -2   2   23.70    1.50
  -3  -2  -2   21.80    1.30
  -3  -2  -2   23.80    1.60
  -3  -2  -2   26.50    1.50
   3   2   2   22.80    2.70
   3   2   2   23.60    1.40
  -3   2  -2   25.70    1.70
  -3   2  -2   22.90    1.40
  -4  -2  -2    6.60    1.10
  -4  -2  -2    2.90    0.90
   4  -2   2    3.10    1.00
   4  -2   2    6.80    1.00
  -4  -2  -2    9.40    1.40
   4   2   2    6.10    1.00
  -4   2  -2    4.80    1.10
   4   2   2    7.70    1.00
  -4   2  -2    4.90    1.40
   4   2   2    4.20    2.20
   5  -2   2 1374.36   53.39
  -5  -2  -2 1432.46   44.40
   5  -2   2 1430.46   44.40
  -5  -2  -2 1438.36   45.30
   5   2   2 1421.56   44.40
  -5   2  -2 1446.46   45.40
  -5   2  -2 1396.06   44.40
   5   2   2 1396.26   53.29
  -6  -2  -2   42.70    2.70
  -6  -2  -2   51.59    3.10
   6  -2   2   40.80    2.70
   6  -2   2   49.10    2.60
   6   2   2   44.70    2.60
   6   2   2   35.60    4.00
  -6   2  -2   42.20    2.80
  -6   2  -2   45.80    3.20
   6   2   2   51.49    2.60
   7  -2   2  452.75   18.10
  -7  -2  -2  454.55   15.40
   7  -2   2  474.35   15.40
  -7  -2  -2  487.25   16.10
   7   2   2  466.25   15.40
  -7   2  -2  484.05   16.10
   7   2   2  451.45   18.10
  -7   2  -2  445.16   15.40
   8  -2   2   55.29    3.30
  -8  -2  -2   54.79    3.90
  -8  -2  -2   62.39    3.60
  -8   2  -2   47.90    3.90
  -8   2  -2   47.40    3.50
   8   2   2   58.59    3.30
   9  -2   2  121.09    5.80
  -9  -2  -2  124.59    6.20
  -9  -2  -2  120.09    5.60
   9   2   2  124.39    5.80
  -9   2  -2  123.89    6.20
  -9   2  -2  118.69    5.60
 -10  -2  -2   56.89    4.10
  10  -2   2   60.39    3.80
  10   2   2   54.99    3.70
 -10   2  -2   58.59    4.20
 -11  -2  -2   47.50    4.10
 -11   2  -2   51.09    4.20
 -12  -2  -2   94.09    5.50
 -12   2  -2   80.29    5.40
 -13  -2  -2   26.60    4.20
 -13   2  -2   26.90    4.30
  14   3  -2    2.60    2.70
  13  -3  -2   28.80    3.60
  13   3  -2   24.90    3.50
  12  -3  -2    2.30    2.30
  12  -3  -2    8.90    2.50
  12   3  -2    5.40    2.40
  12   3  -2    9.50    2.50
 -12   3   2    0.30    2.70
  11  -3  -2   53.99    3.70
 -11  -3   2   61.49    5.00
  11  -3  -2   51.79    3.70
  11   3  -2   45.80    4.60
 -11   3   2   47.00    4.60
  11   3  -2   45.10    3.50
 -11   3   2   46.80    3.90
  11   3  -2   47.90    3.60
  10  -3  -2    1.30    4.50
 -10  -3   2    2.30    2.60
 -10  -3   2    4.70    2.30
  10  -3  -2    7.80    2.00
  10  -3  -2    6.70    1.90
 -10   3   2    3.60    2.20
  10   3  -2    7.90    1.90
 -10   3   2   -1.30    2.70
  10   3  -2    5.80    1.90
  10   3  -2    4.10    2.50
  -9  -3   2   98.19    5.50
  -9  -3   2   99.59    4.90
   9  -3  -2  100.09    4.60
   9  -3  -2  101.49    4.80
  -9   3   2  100.59    4.90
   9   3  -2   95.29    4.50
   9   3  -2  100.29    4.80
   9   3  -2  102.59    6.20
  -9   3   2   94.19    5.50
   8  -3  -2    2.50    1.30
   8  -3  -2    4.90    1.80
  -8  -3   2    3.80    1.80
   8  -3  -2    3.10    1.50
  -8  -3   2    3.50    2.00
   8   3  -2    2.70    1.60
  -8   3   2    2.90    1.80
   8   3  -2    4.30    2.40
  -8   3   2    2.50    1.90
   8   3  -2    7.10    1.50
   8   3  -2    2.50    1.30
   7  -3  -2   47.40    2.60
  -7  -3   2   43.50    3.00
  -7  -3   2   46.40    2.90
  -7  -3   2   42.20    3.00
   7  -3  -2   43.60    2.80
   7  -3  -2   47.40    2.60
  -7   3   2   47.80    3.20
  -7   3   2   43.30    3.00
   7   3  -2   47.60    2.50
   7   3  -2   43.60    2.60
  -7   3   2   44.60    2.80
   7   3  -2   30.20    3.90
   7   3  -2   43.30    2.70
   6  -3  -2   -0.80    0.90
   6  -3  -2    1.10    1.20
   6  -3  -2   -0.80    0.90
  -6  -3   2    0.90    1.30
  -6  -3   2    0.30    1.10
   6   3  -2   -0.20    1.70
   6   3  -2   -0.30    0.90
  -6   3   2   -1.90    1.40
   6   3  -2    0.40    0.90
  -6   3   2    0.60    1.20
  -6   3   2    1.10    1.30
   6   3  -2   -0.10    1.10
  -5  -3   2   10.70    1.40
   5  -3  -2   10.60    1.40
  -5  -3   2    9.20    1.50
   5  -3  -2    8.60    1.10
   5  -3  -2    9.20    1.30
  -5   3   2    9.50    1.50
   5   3  -2    6.00    1.70
  -5   3   2    7.80    1.30
   5   3  -2    6.60    1.10
   5   3  -2    7.80    1.40
   5   3  -2    9.70    1.30
   4  -3  -2   25.30    1.60
   4  -3  -2   26.00    1.40
  -4  -3   2   22.50    1.70
   4  -3  -2   25.00    1.50
   4   3  -2   24.20    1.70
   4   3  -2   22.40    1.40
   4   3  -2   23.80    1.60
  -4   3   2   28.10    1.80
  -4   3   2   24.70    1.60
   4   3  -2   25.00    2.00
   4   3  -2   25.00    1.50
   3  -3  -2    8.90    1.00
   3  -3  -2    9.10    0.80
  -3  -3   2    8.70    1.00
   3  -3  -2   11.90    1.00
   3   3  -2   10.20    1.20
   3   3  -2   10.20    0.90
  -3   3   2   10.00    1.10
   3   3  -2   10.50    1.00
   3   3  -2    8.80    0.70
   3   3  -2    7.90    0.80
   2  -3  -2    4.80    0.40
   2  -3  -2    4.80    0.50
   2  -3  -2    4.60    0.70
   2   3  -2    5.10    0.50
  -2   3   2    5.40    0.70
   2   3  -2    5.20    0.70
  -2   3   2    4.60    0.50
   1  -3  -2    0.30    0.30
   1  -3  -2    0.50    0.30
   1   3  -2    0.40    0.30
  -1   3   2    0.80    0.60
   0  -3  -2    4.10    0.40
   0  -3  -2    2.80    0.40
  -1  -3  -2    3.20    0.50
   1   3   2    3.10    0.60
  -1   3  -2    2.10    0.40
   1   3   2    2.60    0.30
  -2  -3  -2   13.50    0.80
  -2  -3  -2   14.40    1.00
  -2  -3  -2   13.80    1.20
  -2   3  -2   13.10    1.20
   2   3   2   15.30    1.70
   2   3   2   13.50    0.90
  -2   3  -2   14.90    1.00
  -3  -3  -2   11.30    1.40
  -3  -3  -2   11.80    1.00
  -3  -3  -2   12.00    1.20
   3  -3   2   11.30    1.20
   3   3   2   13.30    1.10
  -3   3  -2   12.00    1.20
  -3   3  -2   12.40    1.30
  -4  -3  -2   25.60    1.90
   4  -3   2   16.60    1.70
  -4  -3  -2   21.40    1.60
  -4   3  -2   22.30    1.80
   4   3   2   19.50    1.50
   4   3   2   21.60    1.50
  -4   3  -2   17.80    1.60
  -5  -3  -2  171.18    6.50
   5  -3   2  179.48    6.20
   5  -3   2  170.68    7.20
  -5  -3  -2  163.68    6.20
  -5   3  -2  167.68    6.20
   5   3   2  177.88    6.20
  -5   3  -2  173.08    6.50
   5   3   2  178.98    7.10
   6  -3   2   85.49    4.20
  -6  -3  -2   94.49    4.30
  -6  -3  -2   88.69    3.90
   6  -3   2   89.19    3.80
  -6   3  -2   76.49    3.90
   6   3   2   89.59    3.80
   6   3   2   88.29    4.10
  -6   3  -2   82.69    4.20
   7  -3   2  206.78    8.50
  -7  -3  -2  202.38    8.00
  -7  -3  -2  185.78    7.50
   7   3   2  210.98    7.50
  -7   3  -2  207.28    8.00
   7   3   2  208.38    8.50
  -7   3  -2  203.88    7.60
   8  -3   2   56.39    3.40
  -8  -3  -2   60.69    4.00
  -8  -3  -2   57.49    3.50
  -8   3  -2   48.50    3.90
   8   3   2   55.29    3.30
  -8   3  -2   50.79    3.50
   9  -3   2  160.38    7.00
  -9  -3  -2  152.38    6.60
  -9   3  -2  139.99    7.00
  -9   3  -2  155.28    6.60
   9   3   2  161.08    7.00
 -10  -3  -2   33.50    3.50
  10  -3   2   39.00    3.20
 -10   3  -2   29.70    3.50
  10   3   2   36.40    3.10
 -11  -3  -2   71.59    4.80
 -11   3  -2   72.79    4.70
 -12  -3  -2   32.20    3.90
 -12   3  -2   30.40    4.10
 -13  -3  -2   75.29    5.40
 -13   3  -2   74.89    5.30
  14   4  -2    4.10    2.80
  13  -4  -2  110.29    5.80
  13   4  -2  112.09    5.90
  12  -4  -2    2.60    2.40
  12  -4  -2   -0.90    2.10
  12   4  -2   -0.50    2.10
  12   4  -2    1.00    2.20
 -12   4   2   -3.10    2.60
  11  -4  -2  104.09    5.30
  11  -4  -2  110.49    5.70
 -11  -4   2  125.49    7.20
  11   4  -2  118.59    5.60
 -11   4   2  112.79    6.50
  11   4  -2   98.69    6.80
  11   4  -2  106.99    5.30
 -11   4   2  114.19    5.70
 -10  -4   2    0.40    2.10
  10  -4  -2    6.60    1.90
  10  -4  -2    4.30    1.90
 -10  -4   2    1.90    2.50
 -10   4   2   -3.60    2.60
  10   4  -2    6.40    1.90
  10   4  -2    3.60    2.40
  10   4  -2    3.40    1.80
 -10   4   2    1.20    2.20
  -9  -4   2  134.69    5.70
   9  -4  -2  124.79    5.40
   9  -4  -2  133.29    5.90
  -9  -4   2  118.29    6.40
  -9   4   2  123.59    6.50
   9   4  -2  128.69    5.80
   9   4  -2  128.79    5.40
  -9   4   2  132.29    5.70
   9   4  -2  130.09    7.20
  -8  -4   2   -0.80    1.50
   8  -4  -2    1.80    1.30
   8  -4  -2   -0.30    1.30
  -8  -4   2    0.80    1.90
   8  -4  -2    0.30    1.60
   8   4  -2   -0.20    1.30
  -8   4   2   -2.30    1.50
  -8   4   2   -1.30    1.80
   8   4  -2   -0.10    1.20
   8   4  -2    0.00    1.70
   8   4  -2    0.60    1.50
   7  -4  -2   35.50    2.40
   7  -4  -2   30.00    2.10
  -7  -4   2   30.60    2.70
  -7  -4   2   28.20    2.40
   7  -4  -2   30.80    2.20
  -7   4   2   27.70    2.60
   7   4  -2   28.80    2.10
   7   4  -2   30.20    2.40
  -7   4   2   26.80    2.70
   7   4  -2   28.20    2.90
   7   4  -2   31.20    2.20
  -7   4   2   31.80    2.50
  -6  -4   2   22.00    2.00
  -6  -4   2   26.50    2.20
   6  -4  -2   22.40    1.70
   6  -4  -2   23.70    1.90
   6  -4  -2   22.50    1.90
   6   4  -2   18.40    2.40
  -6   4   2   22.80    2.00
   6   4  -2   21.10    1.90
   6   4  -2   25.00    1.80
  -6   4   2   25.60    2.20
   6   4  -2   22.20    1.70
  -6   4   2   22.20    2.30
  -5  -4   2    7.40    1.30
   5  -4  -2    5.10    1.10
   5  -4  -2    8.70    1.30
  -5  -4   2    7.00    1.20
   5  -4  -2   10.40    1.30
   5   4  -2    4.90    1.10
   5   4  -2    6.60    1.70
  -5   4   2    6.10    1.30
   5   4  -2    7.00    1.30
  -5   4   2    6.30    1.20
   5   4  -2    6.80    1.10
   4  -4  -2  132.19    5.30
   4  -4  -2  138.89    4.70
   4  -4  -2  135.89    4.90
  -4  -4   2  125.99    5.40
  -4   4   2  134.29    4.70
   4   4  -2  120.59    5.40
   4   4  -2  126.29    5.30
   4   4  -2  137.69    4.80
   4   4  -2  133.69    6.30
  -4   4   2  136.09    5.60
   4   4  -2  132.99    4.70
   3  -4  -2    3.30    0.80
   3  -4  -2    4.60    0.90
  -3  -4   2    3.30    0.90
   3  -4  -2    4.10    1.00
   3  -4  -2    2.10    0.70
   3   4  -2    2.80    1.10
   3   4  -2    2.40    0.60
   3   4  -2    3.40    0.80
   3   4  -2    4.50    1.10
   3   4  -2    4.50    0.80
   3   4  -2    3.40    0.90
  -3   4   2    5.40    1.10
   2  -4  -2   39.20    1.90
   2  -4  -2   42.00    1.90
   2  -4  -2   44.90    1.80
   2   4  -2   42.70    1.80
  -2   4   2   42.20    2.00
   2   4  -2   44.80    1.70
  -2   4   2   38.40    2.00
   2   4  -2   41.40    2.30
   1  -4  -2   -0.20    0.50
  -1   4   2   -1.70    0.30
  -1   4   2   -0.60    0.80
  -1   4   2   -2.00    0.30
   1   4  -2   -0.80    0.60
   0  -4  -2   65.29    2.30
   0   4   2   59.29    3.10
  -1  -4  -2   -1.40    0.50
  -1   4  -2   -0.50    0.50
  -1   4  -2   -1.00    0.60
   1   4   2   -1.10    0.40
   1   4   2   -0.60    0.60
  -2  -4  -2  492.15   16.30
  -2  -4  -2  524.95   16.00
  -2   4  -2  513.15   16.30
   2   4   2  511.75   22.10
   2   4   2  495.75   19.10
  -2   4  -2  491.55   15.90
  -3  -4  -2    6.10    1.10
  -3  -4  -2    9.60    1.30
  -3  -4  -2    4.10    0.80
  -3   4  -2    6.70    1.00
  -3   4  -2    8.40    1.30
   3   4   2    7.70    1.40
   3   4   2    6.40    0.90
   4  -4   2  155.58    6.80
  -4  -4  -2  162.88    5.80
  -4  -4  -2  167.98    6.10
   4   4   2  167.88    6.70
  -4   4  -2  164.78    5.80
   4   4   2  166.38    5.80
  -4   4  -2  173.58    6.10
   5  -4   2   30.80    2.50
  -5  -4  -2   40.50    2.40
  -5  -4  -2   45.70    2.70
   5  -4   2   41.90    2.20
  -5   4  -2   39.60    2.40
  -5   4  -2   42.40    2.70
   5   4   2   51.59    2.40
   5   4   2   36.50    2.30
   5   4   2   29.30    3.60
  -6  -4  -2    6.30    1.80
   6  -4   2    0.40    1.40
   6  -4   2    4.90    1.30
  -6  -4  -2    7.30    1.50
   6   4   2    5.20    1.20
  -6   4  -2   -1.70    1.40
  -6   4  -2   -1.50    1.80
   6   4   2    5.60    1.20
   6   4   2    2.90    2.10
   7  -4   2  100.99    4.90
  -7  -4  -2  115.19    5.10
  -7  -4  -2  102.69    4.70
  -7   4  -2  107.09    5.10
   7   4   2  104.09    4.50
  -7   4  -2  102.99    4.70
   7   4   2  100.09    4.80
   8  -4   2   10.00    1.90
  -8  -4  -2   12.00    2.70
  -8  -4  -2   11.10    2.10
   8   4   2   13.10    1.90
  -8   4  -2    6.60    2.70
  -8   4  -2    7.10    2.10
  -9  -4  -2  138.79    6.20
   9  -4   2  146.39    6.60
   9   4   2  139.49    6.50
  -9   4  -2  139.59    6.20
  -9   4  -2  148.19    6.70
 -10  -4  -2   -3.10    2.20
  10  -4   2    1.10    1.90
 -10   4  -2    1.00    2.40
  10   4   2   -0.40    1.90
 -11  -4  -2  101.09    5.60
 -11   4  -2  102.19    5.50
 -12  -4  -2    2.50    3.00
 -12   4  -2    2.20    3.00
 -13  -4  -2  149.39    7.40
 -13   4  -2  146.59    7.40
  14   5  -2    3.00    2.80
  13  -5  -2   61.79    4.40
  13   5  -2   51.09    4.20
  12  -5  -2   -2.00    2.00
 -12   5   2   -0.50    2.70
  12   5  -2   -2.10    2.10
  12   5  -2    1.00    2.20
 -11  -5   2   56.29    5.50
  11  -5  -2   49.40    3.60
  11  -5  -2   56.09    3.80
 -11   5   2   51.39    4.10
  11   5  -2   58.39    3.70
 -11   5   2   40.00    4.60
  11   5  -2   51.49    4.70
  11   5  -2   50.89    3.60
  10  -5  -2    3.00    1.80
 -10  -5   2    1.60    2.20
 -10  -5   2    3.60    2.70
  10  -5  -2    1.90    1.80
 -10   5   2   -0.40    2.10
  10   5  -2    2.60    1.70
  10   5  -2    2.60    1.70
  10   5  -2    1.60    2.30
 -10   5   2   -2.00    2.70
   9  -5  -2  100.59    4.60
   9  -5  -2   97.79    4.80
  -9  -5   2   97.69    5.40
  -9  -5   2  101.29    4.90
  -9   5   2   93.49    5.50
  -9   5   2  101.49    4.90
   9   5  -2   97.29    4.60
   9   5  -2  102.99    4.80
   9   5  -2  101.79    6.10
   8  -5  -2   -0.40    1.50
   8  -5  -2   -2.50    1.20
   8  -5  -2   -0.30    1.30
  -8  -5   2   -2.40    1.50
  -8  -5   2    1.20    2.00
  -8   5   2   -0.40    1.60
   8   5  -2    1.90    1.40
   8   5  -2    1.00    1.60
  -8   5   2   -1.60    1.80
   8   5  -2    1.10    1.30
   8   5  -2    1.30    1.80
   7  -5  -2   38.90    2.40
   7  -5  -2   36.70    2.30
   7  -5  -2   37.50    2.60
  -7  -5   2   37.20    2.60
  -7  -5   2   34.80    2.80
   7   5  -2   33.50    2.50
   7   5  -2   32.90    2.20
  -7   5   2   32.70    2.50
   7   5  -2   34.20    2.30
  -7   5   2   37.70    2.90
   7   5  -2   34.80    3.10
  -7   5   2   35.70    2.90
  -6  -5   2    2.30    1.40
   6  -5  -2    4.60    1.30
   6  -5  -2    4.80    1.10
   6  -5  -2    2.20    1.00
  -6  -5   2    1.20    1.10
   6   5  -2    3.00    1.50
  -6   5   2    2.60    1.20
   6   5  -2    1.70    0.90
  -6   5   2    2.70    1.50
   6   5  -2    0.30    1.10
  -6   5   2    3.10    1.40
   6   5  -2    2.40    1.10
   5  -5  -2    8.50    1.20
   5  -5  -2    8.70    1.30
   5  -5  -2    9.90    1.40
  -5  -5   2    8.60    1.50
  -5  -5   2    9.60    1.40
  -5   5   2    8.20    1.40
   5   5  -2    8.80    1.50
   5   5  -2    6.60    1.10
   5   5  -2    7.70    1.20
   5   5  -2    7.90    1.30
  -5   5   2    8.20    1.40
  -4  -5   2   27.20    1.80
   4  -5  -2   26.60    1.60
   4  -5  -2   27.70    1.60
   4  -5  -2   24.40    1.70
  -4   5   2   27.20    1.90
   4   5  -2   26.50    2.00
   4   5  -2   26.00    1.50
  -4   5   2   27.80    1.70
   4   5  -2   26.20    1.50
   4   5  -2   28.10    1.70
   4   5  -2   26.10    1.70
   3  -5  -2   15.80    1.10
   3  -5  -2   14.40    1.00
  -3  -5   2   14.50    1.10
   3  -5  -2   10.40    1.20
   3   5  -2   11.60    1.10
   3   5  -2   14.20    1.30
  -3   5   2   14.10    1.40
   3   5  -2   12.80    0.80
   3   5  -2   15.20    1.00
   3   5  -2   13.20    0.90
   2  -5  -2    7.50    0.80
   2  -5  -2    7.60    0.70
  -2  -5   2    7.60    0.50
  -2  -5   2    5.80    0.50
   2  -5  -2    6.00    0.70
   2   5  -2    7.40    0.80
   2   5  -2    8.10    0.70
  -2   5   2    7.30    0.90
   2   5  -2    7.10    0.90
   1  -5  -2    3.60    0.60
   1  -5  -2    2.60    0.40
   1  -5  -2    2.60    0.30
   1   5  -2    2.80    0.30
   1   5  -2    2.80    0.60
  -1   5   2    2.90    0.50
  -1   5   2    2.60    0.40
  -1   5   2    3.00    0.80
   0  -5  -2    1.90    0.40
   0   5   2    1.50    0.60
   0   5   2    1.50    0.30
  -1  -5  -2    0.30    0.50
  -1  -5  -2    0.00    0.30
  -1   5  -2    0.40    0.60
   1   5   2    0.30    0.60
   1   5   2    0.00    0.30
  -2  -5  -2    1.90    0.70
   2  -5   2   -0.90    0.50
  -2  -5  -2    0.40    0.50
  -2  -5  -2    0.50    0.80
  -2   5  -2    1.20    0.70
   2   5   2    1.70    0.80
  -2   5  -2    0.50    0.90
   2   5   2    1.00    0.50
  -3  -5  -2   43.90    2.20
  -3  -5  -2   43.40    2.00
  -3  -5  -2   44.00    2.10
  -3   5  -2   40.90    2.00
  -3   5  -2   40.90    2.20
   3   5   2   41.60    2.00
   3   5   2   43.30    2.70
   3   5   2   41.60    2.10
   4  -5   2   31.80    2.20
  -4  -5  -2   41.00    2.30
  -4  -5  -2   37.30    2.00
   4   5   2   34.30    2.60
   4   5   2   40.60    2.00
  -4   5  -2   31.80    2.00
   4   5   2   35.60    2.00
  -4   5  -2   38.10    2.20
  -5  -5  -2  130.59    5.00
   5  -5   2  133.89    5.00
   5  -5   2  137.99    5.90
  -5  -5  -2  133.89    5.30
   5   5   2  132.39    5.60
   5   5   2  138.89    5.10
  -5   5  -2  134.39    5.40
  -5   5  -2  122.79    5.00
   5   5   2  134.09    6.80
   6  -5   2   22.30    2.30
  -6  -5  -2   25.30    2.20
  -6  -5  -2   25.80    2.50
   6  -5   2   23.80    2.10
   6   5   2   26.10    2.80
   6   5   2   26.10    2.10
   6   5   2   26.50    2.00
  -6   5  -2   19.70    2.40
  -6   5  -2   19.80    2.20
  -7  -5  -2  180.38    7.20
   7  -5   2  183.88    7.70
  -7  -5  -2  179.28    6.80
  -7   5  -2  180.48    7.30
  -7   5  -2  171.78    6.80
   7   5   2  185.38    6.80
   7   5   2  171.18    7.50
  -8  -5  -2   14.10    2.30
  -8  -5  -2   11.60    2.60
   8  -5   2   12.60    2.20
  -8   5  -2   10.30    2.20
   8   5   2   15.20    2.10
  -8   5  -2   12.30    2.70
  -9  -5  -2  179.68    7.30
   9  -5   2  184.88    8.00
   9   5   2  183.58    7.90
  -9   5  -2  164.98    7.20
  -9   5  -2  185.38    7.90
  10  -5   2   30.60    3.10
 -10  -5  -2   22.20    3.40
 -10   5  -2   27.20    3.40
  10   5   2   30.80    3.00
 -11  -5  -2   91.09    5.30
 -11   5  -2   95.29    5.30
 -12  -5  -2    5.30    3.10
 -12   5  -2    2.10    3.10
 -13  -5  -2   69.09    5.20
 -13   5  -2   75.79    5.40
  14   6  -2   32.10    3.90
  13  -6  -2   53.69    4.10
  13   6  -2   48.10    4.10
 -13   6   2   50.29    4.70
  12  -6  -2   32.80    3.40
  12   6  -2   28.20    3.40
  12   6  -2   35.40    3.40
 -12   6   2   34.20    3.90
  11  -6  -2   47.40    3.60
  11  -6  -2   50.09    3.60
  11   6  -2   48.50    4.50
 -11   6   2   49.60    4.10
  11   6  -2   54.89    3.70
  11   6  -2   51.39    3.60
 -11   6   2   39.00    4.80
  10  -6  -2   25.80    2.70
  10  -6  -2   20.70    2.70
 -10  -6   2   20.90    2.90
 -10  -6   2   22.40    3.60
 -10   6   2   18.90    3.10
  10   6  -2   21.60    2.40
 -10   6   2   16.60    3.20
  10   6  -2   17.20    2.50
  10   6  -2   21.90    3.30
  -9  -6   2  107.79    5.70
   9  -6  -2  112.89    5.00
  -9  -6   2  118.49    5.20
   9  -6  -2  106.39    5.20
   9   6  -2  110.69    4.90
  -9   6   2  102.89    5.80
  -9   6   2  115.79    5.20
   9   6  -2  111.29    6.50
   9   6  -2  108.79    5.10
   8  -6  -2    3.00    1.70
  -8  -6   2    3.40    2.00
   8  -6  -2    9.40    1.70
  -8  -6   2    4.90    1.70
   8  -6  -2    8.70    1.80
  -8   6   2    7.60    2.00
   8   6  -2    6.20    1.80
  -8   6   2    6.90    1.90
   8   6  -2    6.10    1.60
   8   6  -2    7.80    2.10
   8   6  -2    5.50    1.40
  -7  -6   2   94.09    4.20
   7  -6  -2   95.99    4.40
   7  -6  -2  101.69    4.20
  -7  -6   2   93.79    4.80
   7  -6  -2   99.79    4.30
   7   6  -2   95.29    4.20
  -7   6   2   93.09    4.80
   7   6  -2   88.89    5.40
   7   6  -2   94.89    4.30
   7   6  -2   93.69    4.10
  -7   6   2   98.29    4.20
  -7   6   2  101.39    4.60
   6  -6  -2    0.60    1.00
  -6  -6   2    1.80    1.20
   6  -6  -2    1.00    1.10
   6  -6  -2   -0.60    0.90
  -6  -6   2    1.20    1.40
   6   6  -2   -0.30    0.90
  -6   6   2    0.40    1.10
  -6   6   2   -1.10    1.40
   6   6  -2    0.40    1.10
   6   6  -2    1.80    1.30
   6   6  -2   -0.20    1.00
  -6   6   2    2.00    1.40
  -5  -6   2   25.50    1.80
   5  -6  -2   27.20    1.70
  -5  -6   2   23.50    2.00
   5  -6  -2   25.40    1.90
   5  -6  -2   25.00    1.70
   5   6  -2   28.40    1.90
  -5   6   2   23.90    2.10
  -5   6   2   24.70    1.80
   5   6  -2   27.30    1.70
   5   6  -2   25.50    2.20
   5   6  -2   26.00    1.60
  -5   6   2   25.90    2.10
   4  -6  -2    3.90    1.10
  -4  -6   2   10.40    1.30
   4  -6  -2    6.00    1.00
   4  -6  -2    3.10    0.80
   4   6  -2    8.00    1.20
   4   6  -2    5.90    0.90
   4   6  -2    9.60    1.30
   4   6  -2    8.10    1.10
  -4   6   2    7.30    1.40
   4   6  -2    7.30    1.40
  -4   6   2    3.40    1.00
   3  -6  -2   65.49    2.60
  -3  -6   2   58.29    2.70
   3  -6  -2   63.99    2.50
   3  -6  -2   63.09    2.70
   3   6  -2   62.89    3.20
   3   6  -2   58.39    2.50
  -3   6   2   63.99    2.50
   3   6  -2   51.29    2.50
  -3   6   2   59.69    2.90
   3   6  -2   63.69    2.50
   3   6  -2   62.39    2.40
  -2  -6   2    1.40    0.40
   2  -6  -2    2.60    0.70
   2  -6  -2    1.50    0.60
   2  -6  -2    1.40    0.50
  -2   6   2    2.10    0.70
   2   6  -2    2.40    0.50
   2   6  -2    2.70    0.70
   2   6  -2    1.80    0.70
   1  -6  -2   12.70    0.80
   1  -6  -2   13.60    0.90
   1  -6  -2   12.40    0.70
  -1   6   2   15.30    0.90
   1   6  -2   13.70    0.60
  -1   6   2   14.30    0.80
   1   6  -2   12.50    0.90
   1   6  -2   12.40    1.10
  -1   6   2   15.10    1.30
   0  -6  -2    1.80    0.40
   0  -6  -2    3.20    0.50
   0  -6  -2    1.10    0.40
   0   6  -2    2.50    0.40
   0   6   2    2.00    0.70
   0   6   2    2.10    0.40
  -1  -6  -2 2749.82  106.19
  -1  -6  -2 2829.52   89.59
  -1  -6  -2 2987.80   87.99
   1   6   2 2834.92  122.29
   1   6   2 2859.91  106.49
  -1   6  -2 2823.82   89.49
  -2  -6  -2    0.00    0.60
  -2  -6  -2    0.10    0.90
  -2  -6  -2    0.20    0.50
  -2   6  -2    1.00    0.90
  -2   6  -2    0.70    0.70
   2   6   2    0.90    0.80
   2   6   2    0.00    0.50
  -3  -6  -2  361.46   12.20
  -3  -6  -2  379.46   11.90
  -3   6  -2  372.06   12.10
  -3   6  -2  345.47   11.80
   3   6   2  363.66   16.30
   3   6   2  364.06   14.00
   3   6   2  377.46   12.00
  -4  -6  -2    4.40    1.40
  -4  -6  -2    1.00    1.00
   4  -6   2   -0.20    1.00
   4   6   2    4.00    1.30
   4   6   2    1.70    0.90
  -4   6  -2    3.90    1.10
   4   6   2    2.30    0.90
  -4   6  -2    4.10    1.40
  -5  -6  -2  346.27   11.70
   5  -6   2  359.66   11.70
   5  -6   2  343.47   14.00
  -5  -6  -2  359.46   12.10
  -5   6  -2  366.96   12.20
   5   6   2  345.67   16.10
   5   6   2  352.86   13.80
   5   6   2  359.56   11.80
  -5   6  -2  343.77   11.70
  -6  -6  -2    9.20    1.70
   6  -6   2   11.90    1.60
   6  -6   2    6.90    1.60
  -6  -6  -2   10.70    2.10
  -6   6  -2    8.10    2.20
   6   6   2    9.40    1.60
   6   6   2   10.80    1.50
   6   6   2   11.80    2.30
  -6   6  -2    6.50    1.70
  -7  -6  -2  344.97   11.70
  -7  -6  -2  311.97   11.10
   7  -6   2  309.97   12.90
  -7   6  -2  313.57   11.10
   7   6   2  323.07   11.10
   7   6   2  316.67   12.80
  -7   6  -2  329.87   11.70
   8  -6   2   23.60    2.50
  -8  -6  -2   20.90    2.70
  -8  -6  -2   24.90    3.20
   8   6   2   22.70    2.30
  -8   6  -2   23.50    3.20
  -8   6  -2   20.60    2.80
   9  -6   2  219.58    9.40
  -9  -6  -2  211.98    8.40
  -9   6  -2  229.08    9.10
   9   6   2  218.48    9.30
  -9   6  -2  209.88    8.40
 -10  -6  -2   46.60    3.90
  10  -6   2   51.69    3.70
 -10   6  -2   44.20    3.80
  10   6   2   47.80    3.60
 -11  -6  -2  102.99    5.60
 -11   6  -2  105.49    5.70
 -12  -6  -2   32.10    4.10
 -12   6  -2   37.10    4.20
 -13  -6  -2   34.90    4.50
 -13   6  -2   40.90    4.60
  14   7  -2   59.59    4.70
 -13   7   2   53.49    4.80
  13   7  -2   53.49    4.30
  12  -7  -2   80.29    4.70
 -12   7   2   73.79    5.10
  12   7  -2   84.49    4.70
  11  -7  -2   43.70    3.50
  11  -7  -2   48.60    3.60
  11   7  -2   41.90    4.30
 -11   7   2   32.20    4.70
  11   7  -2   46.90    3.30
  11   7  -2   38.10    3.40
 -11   7   2   38.00    3.80
 -10  -7   2   99.09    6.10
  10  -7  -2   96.39    4.90
  10  -7  -2   93.89    4.70
 -10   7   2   97.19    5.10
  10   7  -2   93.09    6.00
  10   7  -2   92.49    4.70
 -10   7   2   93.59    5.60
  10   7  -2   94.29    4.80
   9  -7  -2   48.10    3.10
  -9  -7   2   49.99    3.40
   9  -7  -2   47.30    3.10
  -9  -7   2   41.40    3.60
  -9   7   2   44.40    3.50
   9   7  -2   45.60    3.90
   9   7  -2   41.90    3.00
  -9   7   2   40.20    3.70
   9   7  -2   45.40    2.90
  -8  -7   2   53.89    3.30
   8  -7  -2   59.29    3.20
  -8  -7   2   57.49    3.70
   8  -7  -2   55.89    3.20
   8  -7  -2   51.49    3.30
  -8   7   2   50.79    3.30
   8   7  -2   54.59    3.30
   8   7  -2   55.09    3.20
  -8   7   2   54.99    3.80
   8   7  -2   57.99    3.10
   8   7  -2   53.79    4.10
  -7  -7   2   19.70    2.10
   7  -7  -2   18.20    2.10
   7  -7  -2   19.80    2.00
   7  -7  -2   20.90    1.90
  -7  -7   2   18.60    2.40
   7   7  -2   18.90    1.80
   7   7  -2   15.70    1.90
   7   7  -2   18.30    2.50
   7   7  -2   18.40    2.10
  -7   7   2   20.70    2.20
  -7   7   2   20.70    2.40
  -7   7   2   22.00    2.60
   6  -7  -2    8.60    1.40
   6  -7  -2    9.20    1.50
   6  -7  -2    9.70    1.50
  -6  -7   2   10.80    1.90
  -6  -7   2   10.30    1.50
   6   7  -2    9.20    1.50
   6   7  -2    9.90    1.60
  -6   7   2    9.60    1.60
   6   7  -2   11.20    1.50
   6   7  -2    9.20    1.90
  -6   7   2   10.40    1.90
  -6   7   2   10.20    1.90
  -5  -7   2   12.60    1.70
   5  -7  -2   13.20    1.50
   5  -7  -2   14.60    1.50
   5  -7  -2   12.20    1.50
   5   7  -2   13.60    1.70
   5   7  -2   12.40    1.80
   5   7  -2   11.00    1.30
   5   7  -2   10.60    1.30
  -5   7   2   13.10    1.80
  -5   7   2   12.30    1.60
  -5   7   2   12.00    1.80
   4  -7  -2   -0.20    0.90
   4  -7  -2    0.30    0.80
   4  -7  -2    0.50    0.80
  -4  -7   2    0.70    0.90
  -4   7   2   -1.70    0.90
   4   7  -2    0.30    1.00
   4   7  -2    0.30    0.70
   4   7  -2    0.30    0.60
   4   7  -2    0.00    0.80
   4   7  -2   -0.90    0.80
   4   7  -2    1.30    0.90
  -4   7   2    0.00    1.00
   3  -7  -2   22.90    1.40
  -3  -7   2   22.50    1.40
   3  -7  -2   22.80    1.50
   3  -7  -2   21.70    1.40
   3   7  -2   21.10    1.70
  -3   7   2   22.00    1.50
   3   7  -2   20.10    1.10
   3   7  -2   21.30    1.50
   3   7  -2   21.30    1.30
   3   7  -2   19.90    1.20
  -3   7   2   24.10    1.70
   2  -7  -2   15.80    1.10
   2  -7  -2   12.90    1.10
   2  -7  -2   13.80    1.00
  -2  -7   2   12.30    0.80
  -2  -7   2   12.80    0.80
   2   7  -2   13.20    1.30
  -2   7   2   14.90    1.20
   2   7  -2   14.90    0.90
   2   7  -2   13.40    1.00
   1  -7  -2   31.90    1.40
   1  -7  -2   29.80    1.40
   1  -7  -2   29.10    1.50
   1   7  -2   28.00    1.20
   1   7  -2   30.40    1.40
  -1   7   2   29.00    1.50
   1   7  -2   29.00    1.80
  -1   7   2   31.10    2.00
   0  -7  -2   30.80    1.40
   0  -7  -2   28.50    1.30
   0   7   2   31.80    1.90
   0   7  -2   30.30    1.40
   0   7  -2   29.20    1.20
   0   7   2   30.10    1.40
  -1  -7  -2    4.80    0.60
  -1  -7  -2    5.80    1.00
  -1  -7  -2    5.20    0.80
   1   7   2    5.30    0.70
  -1   7  -2    5.30    0.90
   1   7   2    5.00    1.10
  -2  -7  -2    8.40    1.20
  -2  -7  -2    5.00    0.70
  -2  -7  -2    5.70    0.90
  -2   7  -2    3.70    0.90
   2   7   2    5.60    1.10
   2   7   2    4.40    0.80
  -3  -7  -2    5.90    1.30
  -3  -7  -2    4.30    0.90
  -3   7  -2    5.10    1.00
  -3   7  -2    6.00    1.20
   3   7   2    6.60    1.40
   3   7   2    6.40    1.00
   3   7   2    6.70    1.10
   4  -7   2    7.40    1.30
  -4  -7  -2    5.30    1.10
  -4  -7  -2    6.60    1.50
   4   7   2    7.30    1.20
  -4   7  -2    6.90    1.40
   4   7   2    6.40    1.10
   4   7   2    7.80    1.70
  -4   7  -2    5.00    1.20
  -5  -7  -2    1.10    1.10
  -5  -7  -2    0.10    1.40
   5  -7   2    0.20    1.20
   5  -7   2   -0.20    0.90
   5   7   2    0.50    1.30
   5   7   2    0.50    1.00
  -5   7  -2    0.40    1.20
  -5   7  -2    1.00    1.50
   5   7   2   -0.90    0.90
   6  -7   2   51.19    3.10
   6  -7   2   48.20    2.70
  -6  -7  -2   45.50    2.80
  -6  -7  -2   49.00    3.20
   6   7   2   51.19    3.60
  -6   7  -2   42.20    2.80
  -6   7  -2   46.00    3.30
   6   7   2   50.59    2.80
   6   7   2   48.40    2.80
   7  -7   2    7.70    1.80
  -7  -7  -2   10.20    2.30
  -7  -7  -2    8.40    1.80
   7   7   2    8.80    1.70
   7   7   2   11.00    1.80
  -7   7  -2    7.20    2.20
  -7   7  -2    5.80    1.90
   8  -7   2   89.69    4.50
  -8  -7  -2   76.89    4.70
  -8  -7  -2   82.49    4.40
  -8   7  -2   82.69    4.40
  -8   7  -2   83.09    4.80
   8   7   2   84.59    4.30
   9  -7   2   33.40    2.90
  -9  -7  -2   26.10    3.10
  -9   7  -2   23.70    3.60
   9   7   2   27.60    2.70
  -9   7  -2   24.60    3.10
 -10  -7  -2   88.79    5.10
  10  -7   2   96.39    5.20
 -10   7  -2   95.89    5.20
  10   7   2  100.39    5.20
 -11  -7  -2   25.10    3.60
 -11   7  -2   25.60    3.70
 -12  -7  -2   49.20    4.60
 -12   7  -2   57.09    4.70
 -13  -7  -2    4.60    3.40
 -13   7  -2    6.10    3.40
  14   8  -2   35.50    4.10
 -13   8   2   27.80    4.20
  13   8  -2   20.50    3.40
  12  -8  -2  104.69    5.40
 -12   8   2  107.79    5.80
  12   8  -2  100.19    5.40
  11  -8  -2   16.10    2.90
  11  -8  -2   10.20    2.30
  11   8  -2   12.90    2.50
  11   8  -2   10.70    3.00
  11   8  -2    6.80    2.20
 -11   8   2    7.90    2.70
 -11   8   2   -0.30    3.00
  10  -8  -2  161.38    6.60
 -10  -8   2  162.68    8.40
  10  -8  -2  155.98    7.10
 -10   8   2  153.48    7.70
 -10   8   2  168.98    7.00
  10   8  -2  153.08    7.00
  10   8  -2  153.78    6.50
  10   8  -2  155.48    8.60
  -9  -8   2    7.60    2.10
   9  -8  -2   10.60    2.00
   9  -8  -2    9.30    1.80
  -9  -8   2   13.10    2.70
   9   8  -2    9.30    1.90
  -9   8   2    7.20    2.20
   9   8  -2    8.70    2.40
   9   8  -2    9.90    1.90
  -9   8   2    7.60    2.50
   8  -8  -2  241.28    8.80
   8  -8  -2  242.28   10.00
  -8  -8   2  253.67    9.00
  -8  -8   2  233.98   10.30
   8   8  -2  239.78    8.70
   8   8  -2  244.48    9.00
  -8   8   2  250.47   10.40
   8   8  -2  235.78   11.80
   8   8  -2  237.78    9.80
  -8   8   2  259.97    9.00
   7  -8  -2    3.80    1.30
   7  -8  -2    2.20    1.20
  -7  -8   2    3.40    1.70
  -7  -8   2    0.20    1.30
   7  -8  -2    3.30    1.50
  -7   8   2    2.30    1.50
  -7   8   2    1.00    1.60
  -7   8   2    0.90    1.90
   7   8  -2    2.40    1.30
   7   8  -2    3.60    1.40
   7   8  -2    1.10    1.60
   7   8  -2    1.10    1.10
  -6  -8   2  133.99    6.00
   6  -8  -2  133.39    5.80
   6  -8  -2  137.59    5.30
  -6  -8   2  139.09    5.20
   6  -8  -2  133.59    5.10
  -6   8   2  134.09    6.00
   6   8  -2  129.99    6.80
   6   8  -2  143.99    5.40
   6   8  -2  125.29    5.60
  -6   8   2  141.99    5.60
  -6   8   2  141.99    5.30
   6   8  -2  129.29    5.10
  -5  -8   2    2.40    1.20
   5  -8  -2    2.70    1.00
   5  -8  -2    2.20    1.20
   5  -8  -2    1.00    1.10
  -5  -8   2    2.00    1.00
   5   8  -2    2.50    1.10
   5   8  -2    1.90    1.10
  -5   8   2    2.60    1.20
  -5   8   2    3.00    1.50
   5   8  -2    1.50    0.90
   5   8  -2    2.00    1.20
  -5   8   2    1.90    1.20
   5   8  -2    2.40    1.00
  -4  -8   2  101.09    3.70
  -4  -8   2   98.09    4.20
   4  -8  -2   99.19    3.90
   4  -8  -2   93.49    4.20
   4  -8  -2   96.99    3.70
  -4   8   2   97.79    3.80
   4   8  -2   93.79    4.00
  -4   8   2   97.39    4.40
   4   8  -2   86.49    4.10
   4   8  -2   98.29    5.00
   4   8  -2  102.09    3.90
   4   8  -2  101.49    3.70
   3  -8  -2   11.50    1.20
   3  -8  -2   13.50    1.40
  -3  -8   2   11.90    1.20
   3  -8  -2   14.70    1.30
   3   8  -2   12.60    0.90
  -3   8   2   14.80    1.40
   3   8  -2   14.30    1.10
   3   8  -2   12.70    1.00
   3   8  -2   13.80    1.30
   3   8  -2   12.60    1.60
   2  -8  -2  266.07    9.20
   2  -8  -2  286.27   10.80
  -2  -8   2  262.37   10.50
   2  -8  -2  288.47    9.10
   2   8  -2  268.77   12.30
  -2   8   2  270.97   10.80
   2   8  -2  282.47    8.90
   2   8  -2  275.27    9.20
   1  -8  -2    4.50    0.90
   1  -8  -2   12.00    1.00
   1  -8  -2    7.60    0.80
  -1   8   2    7.90    0.90
   1   8  -2   10.90    1.20
   1   8  -2   10.50    1.00
  -1   8   2   11.20    1.40
   1   8  -2    8.40    0.70
   0  -8  -2  222.78    7.00
   0  -8  -2  198.38    8.10
   0   8   2  207.28    9.60
   0   8  -2  209.28    6.80
   0   8  -2  201.78    7.10
   0   8   2  217.38    8.20
  -1  -8  -2    6.60    1.00
  -1  -8  -2    5.00    1.20
   1   8   2    4.70    1.30
  -1   8  -2    3.20    1.10
  -2  -8  -2 2004.50   60.19
  -2  -8  -2 1960.30   61.29
   2   8   2 1889.21   83.49
   2   8   2 1975.60   72.59
   2   8   2 1887.01   60.29
  -2   8  -2 1887.01   60.09
  -2   8  -2 1960.00   61.19
  -3  -8  -2    7.10    1.20
  -3  -8  -2    9.70    1.50
  -3   8  -2    7.60    1.30
   3   8   2    9.00    1.60
   3   8   2    7.30    1.20
   3   8   2    6.90    1.00
  -3   8  -2    7.80    1.10
  -4  -8  -2  793.92   25.20
   4  -8   2  784.52   30.40
  -4  -8  -2  792.22   25.80
   4   8   2  784.72   30.10
   4   8   2  819.22   25.30
  -4   8  -2  776.32   25.20
   4   8   2  777.42   34.80
  -4   8  -2  826.12   25.80
   5  -8   2   -0.50    1.20
   5  -8   2   -0.30    1.00
  -5  -8  -2    2.40    1.20
  -5  -8  -2   -0.80    1.40
  -5   8  -2    2.10    1.60
   5   8   2    0.70    1.00
   5   8   2   -0.10    1.00
   5   8   2   -0.10    1.30
  -5   8  -2   -1.10    1.20
   6  -8   2  809.92   31.90
  -6  -8  -2  841.02   27.20
  -6  -8  -2  838.32   26.60
   6  -8   2  846.82   26.50
  -6   8  -2  862.91   27.30
   6   8   2  806.62   31.60
   6   8   2  828.82   36.60
  -6   8  -2  800.12   26.50
   6   8   2  832.12   26.60
  -7  -8  -2    1.00    2.10
   7  -8   2    1.70    1.60
  -7  -8  -2    4.30    1.70
   7   8   2    4.50    1.40
  -7   8  -2    0.60    2.10
  -7   8  -2    1.40    1.60
   7   8   2    5.30    1.50
  -8  -8  -2  460.45   15.30
  -8  -8  -2  450.85   15.90
   8  -8   2  437.36   17.90
  -8   8  -2  460.15   15.90
   8   8   2  443.06   17.70
  -8   8  -2  442.76   15.20
   9  -8   2   13.30    2.40
  -9  -8  -2   13.00    2.50
   9   8   2   13.20    2.30
  -9   8  -2    9.80    2.40
  -9   8  -2   11.70    3.20
  10  -8   2  334.77   13.80
 -10  -8  -2  321.47   12.10
  10   8   2  330.97   13.70
 -10   8  -2  344.17   12.20
 -11  -8  -2   13.70    3.10
 -11   8  -2    9.60    3.00
 -12  -8  -2   87.59    5.60
 -12   8  -2   91.59    5.50
 -13  -8  -2    2.70    3.30
 -13   8  -2   -1.80    3.10
 -14   9   2   54.39    5.10
  14   9  -2   53.79    4.50
  13   9  -2   16.00    3.00
 -13   9   2   12.40    3.50
  12  -9  -2  103.59    5.30
 -12   9   2  100.29    5.80
  12   9  -2   94.49    5.30
  11  -9  -2   30.30    3.20
  11  -9  -2   30.20    3.10
  11   9  -2   30.00    2.90
  11   9  -2   28.00    3.10
 -11   9   2   29.90    3.70
  11   9  -2   22.40    3.70
 -11   9   2   18.90    3.70
  10  -9  -2   99.49    4.80
  10  -9  -2  100.59    5.10
 -10   9   2   99.09    5.80
  10   9  -2   93.09    4.80
  10   9  -2   96.79    6.20
  10   9  -2   92.89    4.80
 -10   9   2   98.19    5.20
  -9  -9   2    6.40    2.00
   9  -9  -2    6.80    1.80
   9  -9  -2   11.80    2.20
  -9  -9   2    6.10    2.50
  -9   9   2    4.20    2.10
   9   9  -2    8.90    2.40
   9   9  -2    7.50    1.70
   9   9  -2    6.10    1.80
  -9   9   2    7.00    2.40
   8  -9  -2  108.19    4.70
   8  -9  -2  105.09    5.00
  -8  -9   2  116.09    4.90
  -8  -9   2   99.19    5.30
  -8   9   2  103.29    5.40
  -8   9   2  105.09    4.90
   8   9  -2  105.69    4.80
   8   9  -2  109.79    4.90
   8   9  -2  100.89    4.60
   8   9  -2  106.39    6.10
   7  -9  -2    9.20    1.50
  -7  -9   2   13.90    2.20
  -7  -9   2    9.20    1.70
   7  -9  -2    8.70    1.50
   7  -9  -2   10.40    1.70
  -7   9   2   11.10    2.10
   7   9  -2    5.50    1.60
   7   9  -2    8.40    1.90
   7   9  -2    8.70    1.50
   7   9  -2    9.80    1.50
  -7   9   2    8.70    1.80
  -7   9   2    6.50    1.90
  -6  -9   2   23.80    2.30
   6  -9  -2   21.70    2.00
  -6  -9   2   25.90    2.10
   6  -9  -2   24.70    2.00
   6  -9  -2   22.70    2.10
  -6   9   2   21.20    2.40
   6   9  -2   21.30    1.90
  -6   9   2   22.40    2.10
   6   9  -2   22.30    2.10
   6   9  -2   22.10    2.50
  -6   9   2   24.60    2.40
   6   9  -2   23.60    1.80
  -5  -9   2   10.00    1.90
  -5  -9   2   11.40    1.60
   5  -9  -2    9.30    1.50
   5  -9  -2   13.80    1.90
   5  -9  -2    9.00    1.60
   5   9  -2   10.20    1.90
  -5   9   2   12.40    1.90
   5   9  -2   13.30    1.50
   5   9  -2   11.70    1.70
  -5   9   2   12.40    1.60
  -5   9   2   14.20    1.90
   5   9  -2   10.70    1.40
   5   9  -2   12.90    1.60
   4  -9  -2   23.80    1.70
  -4  -9   2   22.80    1.70
   4  -9  -2   26.60    1.70
   4  -9  -2   24.40    1.80
  -4  -9   2   22.70    1.60
  -4   9   2   26.90    2.00
   4   9  -2   23.40    1.50
   4   9  -2   23.60    1.50
   4   9  -2   23.30    2.10
   4   9  -2   24.50    1.60
  -4   9   2   24.10    1.70
   4   9  -2   23.10    1.70
  -3  -9   2   63.59    2.80
   3  -9  -2   59.59    2.70
   3  -9  -2   64.69    2.90
   3  -9  -2   64.59    2.60
  -3   9   2   65.59    3.10
   3   9  -2   56.39    2.50
   3   9  -2   56.09    2.50
  -3   9   2   62.39    2.60
   3   9  -2   62.49    2.40
   3   9  -2   59.99    2.60
   3   9  -2   59.49    3.40
   2  -9  -2   11.40    1.20
   2  -9  -2   11.60    1.20
   2  -9  -2   11.20    1.30
  -2  -9   2   11.20    0.90
  -2   9   2   11.80    1.30
   2   9  -2   11.60    0.90
   2   9  -2   11.00    1.40
  -2   9   2   11.20    1.20
   2   9  -2   10.50    1.10
   1  -9  -2   38.70    2.00
  -1  -9   2   38.10    1.60
   1  -9  -2   36.80    1.90
   1  -9  -2   39.20    1.80
   1  -9  -2   40.10    2.10
  -1   9   2   38.80    2.00
   1   9  -2   41.10    1.90
  -1   9   2   41.70    2.50
   1   9  -2   44.80    1.60
   1   9  -2   39.50    2.30
   0  -9  -2    2.10    0.50
   0  -9  -2    2.40    0.70
   0  -9  -2    3.50    1.00
   0   9   2    1.50    0.90
   0   9  -2    2.70    0.60
   0   9  -2    2.40    0.80
   0   9   2    1.90    0.60
   1  -9   2   56.79    2.30
  -1  -9  -2   59.89    2.40
  -1  -9  -2   55.09    2.40
  -1  -9  -2   56.89    2.50
   1   9   2   55.99    2.50
   1   9   2   57.39    3.20
  -1   9  -2   55.19    2.50
  -2  -9  -2   43.50    2.30
  -2  -9  -2   39.40    2.00
  -2   9  -2   38.70    2.00
  -2   9  -2   37.40    2.10
   2   9   2   41.60    2.10
   2   9   2   40.10    2.60
   2   9   2   40.70    2.00
  -3  -9  -2   46.00    2.40
  -3  -9  -2   43.20    2.20
  -3   9  -2   39.20    2.20
   3   9   2   43.80    2.30
  -3   9  -2   43.10    2.40
   3   9   2   47.00    2.20
   3   9   2   43.80    2.80
   4  -9   2   55.29    2.50
  -4  -9  -2   55.79    2.80
  -4  -9  -2   51.49    2.60
   4   9   2   55.09    2.70
   4   9   2   52.89    3.40
  -4   9  -2   49.20    2.60
  -4   9  -2   51.39    2.80
   4   9   2   53.59    2.80
  -5  -9  -2    1.60    1.20
  -5  -9  -2    1.30    1.50
   5  -9   2    1.80    1.10
   5  -9   2    0.90    1.30
  -5   9  -2    0.80    1.30
   5   9   2    1.30    1.30
   5   9   2    0.50    1.00
   5   9   2    1.80    1.10
   5   9   2    2.90    1.50
  -5   9  -2    2.30    1.60
  -6  -9  -2  102.39    4.50
  -6  -9  -2   97.79    4.70
   6  -9   2  101.49    5.10
   6   9   2  104.69    4.80
   6   9   2  108.79    5.80
   6   9   2  101.29    4.40
  -6   9  -2  102.79    4.80
  -6   9  -2  105.99    4.50
  -7  -9  -2   -2.10    1.50
   7  -9   2   -1.30    1.50
  -7  -9  -2    0.30    2.00
   7   9   2    1.40    1.30
  -7   9  -2   -0.50    2.00
   7   9   2   -0.70    1.30
  -7   9  -2   -1.80    1.60
  -8  -9  -2  111.79    5.70
   8  -9   2  110.99    5.40
  -8  -9  -2  101.59    5.00
  -8   9  -2  107.89    5.50
   8   9   2  105.49    5.20
  -8   9  -2  107.59    5.10
  -9  -9  -2    1.10    2.10
   9  -9   2    5.40    2.00
   9   9   2    3.30    1.80
  -9   9  -2   -0.30    2.10
  -9   9  -2   -0.90    2.80
  10  -9   2  180.98    8.00
 -10  -9  -2  170.58    7.40
 -10   9  -2  157.88    7.20
  10   9   2  176.08    7.80
 -11  -9  -2    0.30    2.80
 -11   9  -2   -0.50    2.60
 -12  -9  -2   74.69    5.10
 -12   9  -2   66.69    4.90
 -13  -9  -2    0.90    3.20
 -13   9  -2   -0.30    3.10
  14  10  -2   94.99    5.80
 -14  10   2  101.49    6.30
  13  10  -2   30.20    3.70
 -13  10   2   34.10    4.20
  12 -10  -2  134.59    6.30
 -12  10   2  141.59    6.80
  12  10  -2  121.09    6.10
  11 -10  -2   72.39    4.20
  11 -10  -2   65.69    4.40
  11  10  -2   70.59    5.30
  11  10  -2   66.09    4.10
 -11  10   2   70.99    4.60
  11  10  -2   70.99    4.20
 -11  10   2   67.99    5.50
  10 -10  -2   62.69    3.80
  10 -10  -2   64.69    4.10
 -10  10   2   63.49    4.70
  10  10  -2   62.79    3.80
  10  10  -2   62.39    4.80
  10  10  -2   60.89    3.80
 -10  10   2   60.79    4.20
   9 -10  -2   56.99    3.40
  -9 -10   2   49.70    4.50
   9 -10  -2   56.29    3.50
  -9  10   2   59.69    3.90
   9  10  -2   59.09    4.30
   9  10  -2   49.60    3.30
   9  10  -2   54.19    3.30
  -9  10   2   56.39    4.10
   8 -10  -2   61.79    3.30
  -8 -10   2   54.69    3.90
  -8 -10   2   65.29    3.50
   8 -10  -2   57.39    3.40
   8  10  -2   54.69    3.20
  -8  10   2   58.59    3.90
  -8  10   2   57.59    3.60
   8  10  -2   57.29    4.20
   8  10  -2   58.69    3.30
   8  10  -2   62.29    3.50
   7 -10  -2   97.49    4.40
   7 -10  -2  101.49    4.30
   7 -10  -2  100.69    4.60
  -7 -10   2  102.89    4.40
  -7 -10   2   96.99    4.90
   7  10  -2   93.39    4.20
  -7  10   2   99.59    5.00
   7  10  -2   95.39    4.40
  -7  10   2  103.69    4.50
  -7  10   2   96.19    4.80
   7  10  -2  101.19    4.50
   7  10  -2   92.99    5.50
   6 -10  -2    5.70    1.40
   6 -10  -2    6.30    1.30
   6 -10  -2    6.10    1.30
  -6 -10   2    6.10    1.60
  -6 -10   2    5.20    1.30
   6  10  -2    4.80    1.20
   6  10  -2    4.40    1.10
  -6  10   2    2.70    1.50
   6  10  -2    6.70    1.50
   6  10  -2    4.60    1.60
  -6  10   2    6.60    1.80
  -6  10   2    7.10    1.50
   6  10  -2    5.00    1.40
  -5 -10   2  221.78    7.70
   5 -10  -2  226.88    7.90
   5 -10  -2  225.68    7.70
  -5 -10   2  210.48    9.00
   5 -10  -2  219.78    9.00
   5  10  -2  221.98    8.80
   5  10  -2  218.78    7.60
  -5  10   2  221.38    9.10
  -5  10   2  220.68    7.80
  -5  10   2  229.18    8.20
   5  10  -2  213.58   10.40
   5  10  -2  223.18    7.90
   5  10  -2  235.98    8.00
  -4 -10   2   11.70    1.50
  -4 -10   2   12.10    1.40
   4 -10  -2   12.00    1.40
   4 -10  -2   12.00    1.50
   4 -10  -2    9.80    1.40
   4  10  -2   11.60    1.10
   4  10  -2   10.20    1.80
   4  10  -2   12.10    1.50
  -4  10   2   10.20    1.50
   4  10  -2   11.70    1.20
  -4  10   2   14.40    1.80
   4  10  -2   10.40    1.30
  -4  10   2   11.40    1.70
   3 -10  -2  171.38    6.00
   3 -10  -2  181.98    7.00
  -3 -10   2  164.38    6.70
   3 -10  -2  168.88    5.90
   3  10  -2  175.48    8.00
   3  10  -2  173.58    5.80
   3  10  -2  170.78    6.00
  -3  10   2  180.38    5.90
  -3  10   2  172.68    7.00
   3  10  -2  157.98    6.50
   3  10  -2  151.18    6.50
   2 -10  -2    1.30    0.80
   2 -10  -2    0.30    0.80
   2 -10  -2   -1.00    0.70
  -2 -10   2    0.50    0.60
  -2  10   2   -0.30    0.80
   2  10  -2    0.50    0.90
   2  10  -2   -0.40    0.90
  -2  10   2    0.50    0.90
   2  10  -2   -0.10    0.60
  -1 -10   2  200.18    7.80
  -1 -10   2  201.88    7.80
   1 -10  -2  201.78    7.10
   1 -10  -2  210.78    6.90
  -1  10   2  210.88    8.10
   1  10  -2  213.18    6.70
   1  10  -2  200.38    9.30
  -1  10   2  205.88    9.50
   1  10  -2  199.18    7.00
   0 -10   2    0.90    0.40
   0 -10  -2    2.90    0.80
   0  10   2    2.70    1.10
   0  10   2    1.20    0.60
   0  10  -2    5.30    1.00
  -1 -10  -2    4.90    1.10
  -1 -10  -2    4.80    0.90
   1  10   2    7.90    0.90
  -1  10  -2    6.10    1.10
   1  10   2    8.20    1.40
  -2 -10  -2   13.00    1.30
  -2 -10  -2   15.60    1.60
  -2  10  -2   14.90    1.30
   2  10   2   15.30    1.40
  -2  10  -2   13.40    1.60
   2  10   2    8.70    1.10
   2  10   2   11.20    1.70
  -3 -10  -2  719.33   23.30
  -3 -10  -2  716.23   22.70
  -3  10  -2  720.83   23.20
   3  10   2  730.53   22.80
   3  10   2  696.63   31.40
  -3  10  -2  719.23   22.70
   3  10   2  701.33   27.10
  -4 -10  -2   20.50    1.80
  -4 -10  -2   23.10    2.10
   4 -10   2   20.20    1.70
  -4  10  -2   23.20    2.20
   4  10   2   18.20    1.80
   4  10   2   18.40    2.20
  -4  10  -2   18.40    1.80
   4  10   2   23.80    1.80
  -5 -10  -2  507.85   17.30
  -5 -10  -2  505.05   16.80
   5 -10   2  537.65   16.80
   5 -10   2  495.35   20.20
   5  10   2  531.55   17.20
  -5  10  -2  520.95   16.80
  -5  10  -2  527.55   17.30
   5  10   2  503.95   23.10
   5  10   2  515.55   19.90
   5  10   2  517.85   16.90
  -6 -10  -2   33.50    2.60
  -6 -10  -2   38.80    3.00
   6 -10   2   33.10    2.90
   6  10   2   41.30    3.30
  -6  10  -2   37.10    2.60
   6  10   2   38.10    2.60
   6  10   2   36.90    2.50
  -6  10  -2   36.80    2.90
   7 -10   2  141.09    6.60
  -7 -10  -2  144.19    5.80
  -7 -10  -2  139.99    6.20
   7  10   2  139.09    6.30
  -7  10  -2  145.89    6.30
   7  10   2  142.59    5.80
  -7  10  -2  137.19    5.70
   8 -10   2   58.19    3.90
  -8 -10  -2   63.99    3.80
   8  10   2   57.99    3.60
  -8  10  -2   58.59    3.70
  -8  10  -2   62.29    4.20
  -9 -10  -2  172.38    7.30
   9 -10   2  176.38    8.00
  -9  10  -2  177.38    7.80
  -9  10  -2  185.08    7.40
   9  10   2  173.78    7.80
 -10 -10  -2  135.29    6.50
  10 -10   2  145.89    6.90
 -10  10  -2  143.09    6.50
  10  10   2  136.89    6.70
 -11 -10  -2   52.79    4.40
 -11  10  -2   49.10    4.30
 -12 -10  -2   94.99    5.80
 -12  10  -2   98.59    5.80
 -13 -10  -2   10.60    3.60
 -13  10  -2   16.20    3.60
 -14  11   2    3.20    3.50
  14  11  -2    1.90    2.80
 -13  11   2   42.30    4.40
  13  11  -2   37.80    4.00
 -12  11   2   12.50    3.20
  12  11  -2   11.40    2.60
  11 -11  -2   59.29    4.00
  11 -11  -2   67.69    4.30
  11  11  -2   57.89    4.00
  11  11  -2   55.99    4.90
  11  11  -2   63.19    3.90
 -11  11   2   59.89    4.50
 -11  11   2   56.99    5.30
  10 -11  -2    8.20    2.30
  10 -11  -2    4.50    1.90
 -10  11   2    0.90    2.70
  10  11  -2    4.70    2.50
 -10  11   2    2.10    2.40
  10  11  -2    4.70    1.90
  10  11  -2    3.40    1.90
   9 -11  -2   21.60    2.60
   9 -11  -2   22.00    2.50
  -9  11   2   23.10    3.20
   9  11  -2   21.90    3.20
   9  11  -2   19.90    2.50
  -9  11   2   27.10    3.10
   9  11  -2   22.20    2.30
  -8 -11   2    1.30    2.10
   8 -11  -2    9.10    1.80
   8 -11  -2    6.40    1.60
  -8 -11   2    2.30    1.70
   8  11  -2    6.20    1.90
   8  11  -2    5.00    1.40
  -8  11   2    3.50    2.10
  -8  11   2    4.90    2.00
   8  11  -2    4.60    1.60
   8  11  -2    5.50    2.10
   7 -11  -2   10.40    1.80
  -7 -11   2   12.20    2.20
  -7 -11   2   13.10    2.10
   7 -11  -2   12.30    1.90
   7 -11  -2   12.50    1.80
  -7  11   2    9.80    2.30
   7  11  -2   12.80    1.90
   7  11  -2   13.60    2.40
  -7  11   2   11.70    2.40
   7  11  -2   10.70    1.60
  -7  11   2   10.50    1.90
   7  11  -2   12.00    2.10
   6 -11  -2    2.30    1.30
   6 -11  -2    2.70    1.20
  -6 -11   2    3.20    1.40
  -6 -11   2    2.50    1.20
   6 -11  -2    2.80    1.30
   6  11  -2    2.90    1.30
  -6  11   2    2.80    1.50
   6  11  -2    2.80    1.30
  -6  11   2    2.20    1.40
  -6  11   2    1.20    1.70
   6  11  -2    1.20    1.50
   6  11  -2    3.00    1.20
   6  11  -2    2.40    1.10
  -5 -11   2    1.00    1.10
   5 -11  -2    3.70    1.20
  -5 -11   2    4.50    1.30
   5 -11  -2    2.80    1.10
   5 -11  -2    2.80    1.20
   5  11  -2    0.70    1.10
   5  11  -2    2.30    1.40
  -5  11   2    2.00    1.30
   5  11  -2    2.00    0.90
   5  11  -2    1.80    1.00
  -5  11   2    1.90    1.50
  -5  11   2    2.10    1.20
  -4 -11   2   12.40    1.50
  -4 -11   2   13.80    1.50
   4 -11  -2   14.30    1.60
   4 -11  -2   12.30    1.60
   4 -11  -2   15.70    1.50
   4  11  -2   12.90    1.50
   4  11  -2   12.20    1.30
  -4  11   2   14.60    1.90
   4  11  -2   13.30    1.30
  -4  11   2   16.20    1.80
   4  11  -2   10.80    1.80
   4  11  -2   12.50    1.40
  -4  11   2   11.90    1.50
   3 -11  -2   15.90    1.50
   3 -11  -2   18.90    1.50
   3 -11  -2   21.70    1.80
  -3 -11   2   21.40    1.50
  -3  11   2   17.50    1.60
   3  11  -2   19.30    1.90
   3  11  -2   19.00    1.20
  -3  11   2   20.90    1.80
   3  11  -2   19.30    1.20
   3  11  -2   16.80    1.50
   3  11  -2   20.40    1.40
   2 -11  -2    7.80    1.10
  -2 -11   2    8.40    0.90
   2 -11  -2    5.80    1.00
   2 -11  -2    7.30    1.30
   2  11  -2    6.30    1.00
  -2  11   2    5.60    1.10
  -2  11   2    6.90    1.10
   2  11  -2    6.40    1.40
   2  11  -2    6.90    1.20
  -1 -11   2   10.50    0.80
   1 -11  -2   11.80    1.30
   1 -11  -2   13.50    1.30
   1  11  -2   14.20    1.60
  -1  11   2   10.00    1.40
  -1  11   2   12.50    1.80
   1  11  -2   12.80    1.10
  -1  11   2    9.70    1.20
   1  11  -2   12.00    1.40
   0 -11  -2   26.30    1.50
   0 -11  -2   22.00    1.70
   0  11  -2   23.70    1.60
   0  11   2   25.30    1.50
   0  11   2   27.20    2.20
  -1 -11  -2   12.30    1.20
  -1 -11  -2   10.80    1.40
  -1  11  -2    8.00    1.30
   1  11   2   10.70    1.60
   1  11   2    9.60    1.10
  -2 -11  -2   73.39    3.10
  -2 -11  -2   77.49    3.30
   2  11   2   77.49    3.20
   2  11   2   76.29    4.10
  -2  11  -2   71.29    3.00
   2  11   2   77.89    3.30
  -2  11  -2   72.99    3.20
  -3 -11  -2   52.19    2.80
  -3 -11  -2   53.99    2.60
   3  11   2   53.19    2.60
  -3  11  -2   51.99    2.50
  -3  11  -2   52.09    2.70
   3  11   2   51.59    3.30
   3  11   2   54.79    2.60
   4 -11   2   79.39    3.30
  -4 -11  -2   78.09    3.40
  -4 -11  -2   76.89    3.70
   4  11   2   89.59    3.60
   4  11   2   79.19    4.50
  -4  11  -2   73.29    3.60
   4  11   2   83.19    3.70
  -4  11  -2   72.59    3.40
   5 -11   2   85.29    4.40
   5 -11   2   83.49    3.60
  -5 -11  -2   80.39    3.70
  -5 -11  -2   83.29    4.00
   5  11   2   85.79    3.80
  -5  11  -2   77.89    3.70
   5  11   2   85.39    3.90
   5  11   2   81.89    3.90
   5  11   2   82.29    4.80
   5  11   2   85.09    3.70
  -5  11  -2   80.79    4.00
  -6 -11  -2   54.59    3.10
   6 -11   2   59.19    3.70
  -6 -11  -2   59.29    3.60
  -6  11  -2   56.49    3.20
  -6  11  -2   54.69    3.60
   6  11   2   64.09    3.20
   6  11   2   57.29    3.20
   6  11   2   61.79    4.10
   7 -11   2   60.29    3.70
  -7 -11  -2   51.49    3.60
  -7 -11  -2   53.69    3.30
   7  11   2   58.59    3.30
  -7  11  -2   60.69    4.00
  -7  11  -2   52.69    3.30
   7  11   2   56.69    3.30
  -8 -11  -2   60.69    3.80
   8 -11   2   65.99    4.10
  -8  11  -2   68.99    4.40
  -8  11  -2   63.09    3.90
   8  11   2   61.39    3.70
   9 -11   2  195.88    8.70
  -9 -11  -2  183.18    7.70
  -9  11  -2  186.28    8.30
   9  11   2  198.18    8.40
  -9  11  -2  195.48    7.80
 -10 -11  -2   98.09    5.40
  10 -11   2  105.09    5.60
  10  11   2   98.69    5.30
 -10  11  -2   95.79    5.30
 -11 -11  -2  110.29    6.00
 -11  11  -2  117.89    6.00
 -12 -11  -2   41.80    4.30
 -12  11  -2   30.70    4.10
 -13 -11  -2   43.50    4.90
 -13  11  -2   51.19    4.70
  14  12  -2   -1.90    2.70
 -14  12   2   -1.60    3.40
  13  12  -2  159.98    7.40
 -13  12   2  158.98    7.80
  12  12  -2    3.10    2.40
 -12  12   2    4.60    3.10
  11 -12  -2  128.29    6.00
  11 -12  -2  129.09    6.40
  11  12  -2  120.19    5.90
 -11  12   2  133.79    7.30
 -11  12   2  131.19    6.30
  11  12  -2  125.89    7.70
  10 -12  -2    2.80    1.90
  10 -12  -2    3.80    2.20
  10  12  -2    0.30    1.80
  10  12  -2    0.90    2.30
  10  12  -2   -0.40    1.70
 -10  12   2   -5.00    2.60
 -10  12   2   -0.40    2.30
   9 -12  -2   23.10    2.70
   9 -12  -2   22.20    2.60
   9  12  -2   21.40    2.30
   9  12  -2   18.30    2.50
  -9  12   2   17.00    3.00
   9  12  -2   24.60    3.30
  -9  12   2   17.10    2.90
  -8 -12   2    8.20    2.70
  -8 -12   2    9.60    2.00
   8 -12  -2    9.10    1.80
   8 -12  -2    8.30    1.80
  -8  12   2   10.40    2.20
  -8  12   2    9.80    2.30
   8  12  -2    9.90    2.30
   8  12  -2    8.00    1.70
   8  12  -2    8.50    1.80
   8  12  -2   10.80    2.10
   7 -12  -2    5.10    1.40
   7 -12  -2    3.90    1.50
  -7 -12   2    4.50    1.50
  -7 -12   2    6.30    2.00
   7 -12  -2    4.70    1.60
   7  12  -2    5.40    2.00
   7  12  -2    6.10    1.50
   7  12  -2    4.80    1.30
   7  12  -2    6.20    1.80
  -7  12   2    5.10    1.80
  -6 -12   2   13.90    2.00
   6 -12  -2   11.40    1.80
   6 -12  -2   11.60    1.80
  -6 -12   2   12.00    2.00
   6 -12  -2   11.10    1.90
   6  12  -2   10.50    2.20
   6  12  -2   11.90    1.90
   6  12  -2   13.10    1.60
   6  12  -2   12.00    1.70
   6  12  -2   10.50    1.90
  -6  12   2   11.40    2.20
  -6  12   2   14.20    2.40
  -6  12   2   15.10    1.90
   5 -12  -2   -0.20    1.10
  -5 -12   2    1.60    1.20
   5 -12  -2    1.20    1.00
   5 -12  -2    0.70    1.20
  -5 -12   2    1.30    1.10
   5  12  -2    0.20    0.90
  -5  12   2    1.70    1.60
   5  12  -2    2.10    1.20
  -5  12   2    0.30    1.30
   5  12  -2   -1.10    0.90
   5  12  -2    2.60    1.50
  -5  12   2    6.10    1.40
   4 -12  -2    2.70    1.00
  -4 -12   2    2.10    1.00
   4 -12  -2    1.90    1.20
   4 -12  -2    4.60    1.20
  -4 -12   2    4.50    1.20
   4  12  -2    2.70    0.90
  -4  12   2    3.80    1.30
  -4  12   2    3.50    1.50
   4  12  -2    5.90    1.20
   4  12  -2    3.30    1.30
  -4  12   2    4.30    1.20
   4  12  -2    3.70    1.10
   4  12  -2    3.30    1.00
   3 -12  -2    2.50    1.10
   3 -12  -2    3.80    1.00
   3 -12  -2    1.60    1.00
  -3 -12   2    4.20    0.90
   3  12  -2    3.50    1.20
   3  12  -2    4.80    1.10
   3  12  -2    3.70    0.80
   3  12  -2    2.80    0.70
  -3  12   2    3.30    1.10
   3  12  -2    3.90    0.90
  -3  12   2    3.40    1.10
   2 -12  -2   28.10    2.10
  -2 -12   2   25.30    1.60
   2 -12  -2   24.20    1.70
   2 -12  -2   25.60    1.80
  -2  12   2   26.40    1.80
   2  12  -2   27.90    2.20
  -2  12   2   27.00    2.00
   2  12  -2   27.50    1.90
   2  12  -2   27.80    1.60
  -1 -12   2   -0.70    0.70
   1 -12  -2    4.30    1.00
   1 -12  -2    3.90    1.20
  -1  12   2    2.10    0.90
   1  12  -2    3.20    1.20
   1  12  -2    1.60    0.80
  -1  12   2    2.20    1.10
   1  12  -2    2.70    1.30
  -1  12   2    2.60    1.40
   0 -12  -2    0.70    0.90
   0 -12  -2    0.00    1.00
   0  12  -2    1.20    1.10
   0  12   2    1.80    1.20
   0  12   2    1.10    0.80
  -1 -12  -2    1.70    1.10
  -1 -12  -2    0.50    0.80
  -1  12  -2   -0.20    1.10
   1  12   2    1.00    1.10
   1  12   2    1.80    0.70
  -2 -12  -2    4.40    1.30
  -2 -12  -2    5.20    1.10
   2  12   2    6.30    1.40
  -2  12  -2    4.10    1.30
   2  12   2    5.90    1.10
   2  12   2    5.70    1.10
  -2  12  -2    3.50    1.10
  -3 -12  -2   16.80    1.60
  -3 -12  -2   13.40    1.70
   3  12   2   11.90    1.40
   3  12   2   12.70    1.90
   3  12   2   13.50    1.60
  -3  12  -2   11.20    1.50
  -3  12  -2   10.30    1.70
  -4 -12  -2   74.99    3.70
  -4 -12  -2   77.29    3.40
   4 -12   2   76.39    3.30
   4  12   2   73.79    3.40
  -4  12  -2   72.59    3.40
   4  12   2   77.49    3.50
   4  12   2   77.49    3.60
   4  12   2   80.69    4.50
  -4  12  -2   78.79    3.80
   5 -12   2   21.70    2.50
  -5 -12  -2   30.40    2.30
  -5 -12  -2   32.60    2.60
   5 -12   2   26.40    2.10
   5  12   2   25.70    2.10
  -5  12  -2   28.90    2.60
   5  12   2   31.00    2.30
  -5  12  -2   25.10    2.20
   5  12   2   32.20    2.40
   5  12   2   30.20    2.80
   5  12   2   34.40    2.50
  -6 -12  -2    0.50    1.80
  -6 -12  -2    0.90    1.40
   6 -12   2   -0.60    1.50
   6  12   2    2.00    1.70
  -6  12  -2    1.70    2.10
   6  12   2    1.40    1.30
   6  12   2    1.90    1.20
  -6  12  -2    0.20    1.50
   7 -12   2   18.40    2.60
  -7 -12  -2   24.90    2.60
  -7 -12  -2   21.20    2.90
  -7  12  -2   22.50    2.80
  -7  12  -2   20.00    2.60
   7  12   2   24.80    2.50
   7  12   2   23.70    2.30
  -8 -12  -2   16.50    2.60
   8 -12   2   14.70    2.60
  -8  12  -2   13.30    2.40
   8  12   2   15.40    2.30
  -8  12  -2   15.20    2.90
   8  12   2   14.40    2.20
   9 -12   2  158.48    7.60
  -9 -12  -2  159.48    6.80
  -9  12  -2  170.18    7.40
   9  12   2  149.49    7.20
  -9  12  -2  162.18    6.90
 -10 -12  -2   16.60    3.00
  10 -12   2   14.90    2.90
 -10  12  -2   14.40    3.00
  10  12   2   14.30    2.80
 -11 -12  -2  188.48    8.30
 -11  12  -2  190.08    8.20
 -12 -12  -2    4.50    3.10
 -12  12  -2   -5.90    2.80
 -13 -12  -2   97.79    6.10
 -13  12  -2   86.69    5.70
  14  13  -2   -1.50    2.60
 -14  13   2    2.70    3.50
 -13  13   2   66.29    5.10
  13  13  -2   55.89    4.50
  12  13  -2    1.30    2.20
 -12  13   2    0.40    2.80
  11 -13  -2   90.09    4.80
  11 -13  -2   90.29    5.10
 -11  13   2   84.49    5.20
  11  13  -2   83.69    4.80
  11  13  -2   84.19    6.00
 -11  13   2   75.79    6.00
  10 -13  -2    2.30    2.20
  10 -13  -2    0.50    1.80
  10  13  -2   -0.40    1.80
 -10  13   2   -4.00    2.50
  10  13  -2   -0.10    1.70
  10  13  -2    1.60    2.40
 -10  13   2    1.50    2.40
   9 -13  -2   19.40    2.50
   9 -13  -2   24.90    2.90
  -9  13   2   15.10    3.00
   9  13  -2   17.90    2.30
   9  13  -2   19.80    2.50
   9  13  -2   17.60    3.20
  -9  13   2   22.60    3.10
   8 -13  -2   -0.60    1.60
   8 -13  -2   -1.00    1.40
  -8  13   2   -1.20    1.80
  -8  13   2    0.00    2.00
   8  13  -2    1.10    1.70
   8  13  -2    1.10    1.40
   8  13  -2    1.70    1.50
   8  13  -2    1.70    2.00
   7 -13  -2    2.90    1.50
  -7 -13   2    2.90    1.50
   7 -13  -2    2.10    1.50
  -7 -13   2    2.70    2.10
   7 -13  -2    3.80    1.60
  -7  13   2    3.10    1.90
   7  13  -2    3.90    1.40
  -7  13   2    3.80    1.70
   7  13  -2    2.70    1.30
   7  13  -2    2.10    1.80
   7  13  -2    3.80    1.70
   6 -13  -2   40.90    2.50
   6 -13  -2   35.60    2.60
  -6 -13   2   36.80    2.80
  -6 -13   2   40.20    2.60
   6 -13  -2   34.40    2.60
  -6  13   2   35.70    2.90
   6  13  -2   37.60    2.40
   6  13  -2   35.50    3.10
  -6  13   2   38.30    2.70
   6  13  -2   35.60    2.70
   6  13  -2   36.40    2.30
   6  13  -2   36.90    2.60
  -6  13   2   33.90    2.90
   5 -13  -2    8.30    1.50
   5 -13  -2    9.00    1.60
   5 -13  -2    8.80    1.40
  -5 -13   2    8.30    1.70
  -5 -13   2    7.70    1.40
   5  13  -2    9.80    1.40
  -5  13   2   10.70    1.80
   5  13  -2    8.50    1.60
  -5  13   2    8.60    1.60
   5  13  -2    9.20    1.50
  -5  13   2    9.20    1.90
   5  13  -2    8.00    1.70
   4 -13  -2   34.70    2.70
   4 -13  -2   35.80    2.20
  -4 -13   2   31.80    2.20
  -4 -13   2   34.50    2.10
   4 -13  -2   38.50    2.30
   4  13  -2   38.50    2.00
   4  13  -2   32.70    2.00
   4  13  -2   33.90    2.70
   4  13  -2   31.60    2.10
  -4  13   2   40.90    2.30
  -4  13   2   32.70    2.50
   4  13  -2   35.40    2.20
  -3 -13   2   13.10    1.30
   3 -13  -2   11.10    1.40
   3 -13  -2   10.50    1.50
   3 -13  -2   12.10    1.70
   3  13  -2   11.80    1.30
   3  13  -2   12.60    1.00
  -3  13   2   11.00    1.60
   3  13  -2   11.30    1.00
   3  13  -2   11.80    1.80
   3  13  -2   11.80    1.40
  -3  13   2   10.40    1.70
  -3  13   2   13.60    1.70
   2 -13  -2   18.30    1.50
  -2 -13   2    9.90    1.30
   2 -13  -2   16.70    1.80
   2 -13  -2   16.20    1.60
   2  13  -2   16.60    1.50
  -2  13   2   12.90    1.60
  -2  13   2   16.20    1.60
   2  13  -2   17.80    1.30
   2  13  -2   15.10    1.90
   1 -13  -2   21.80    1.60
   1 -13  -2   22.00    1.80
   1  13  -2   19.40    1.40
  -1  13   2   26.00    2.30
   1  13  -2   24.00    1.80
  -1  13   2   24.90    1.80
  -1  13   2   21.90    1.70
   1  13  -2   23.70    2.10
   0 -13  -2    9.70    1.50
   0 -13  -2   10.10    1.30
   0  13   2    8.90    1.80
   0  13   2    7.50    1.20
   0  13  -2    9.20    1.40
  -1 -13  -2    0.90    0.90
  -1 -13  -2    1.80    1.20
   1  13   2    1.30    0.80
   1  13   2    2.20    1.20
  -1  13  -2    0.70    1.10
  -2 -13  -2    3.40    1.20
  -2 -13  -2    3.50    1.00
   2  13   2    4.70    1.30
  -2  13  -2    3.20    1.30
   2  13   2    3.70    0.90
   2  13   2    4.30    1.10
  -3 -13  -2   24.60    2.10
  -3 -13  -2   24.60    1.90
  -3  13  -2   21.70    1.90
   3  13   2   23.90    2.40
  -3  13  -2   28.10    2.10
   3  13   2   25.10    1.90
   3  13   2   25.50    2.00
   4 -13   2    2.40    1.00
  -4 -13  -2    4.40    1.30
  -4 -13  -2    2.80    1.50
  -4  13  -2    3.70    1.50
  -4  13  -2    2.80    1.30
   4  13   2    2.80    1.10
   4  13   2    2.70    1.30
   4  13   2    2.00    1.40
   4  13   2    2.10    1.10
   5 -13   2   91.19    3.80
   5 -13   2   89.79    4.60
  -5 -13  -2   88.19    3.90
  -5 -13  -2   80.89    4.10
   5  13   2   81.39    4.00
  -5  13  -2   86.59    3.90
   5  13   2   85.59    4.10
   5  13   2   87.29    4.00
   5  13   2   93.29    4.00
   5  13   2   89.29    5.10
  -5  13  -2   84.69    4.20
  -6 -13  -2    2.70    1.50
  -6 -13  -2    4.40    2.00
   6 -13   2    0.70    1.60
  -6  13  -2    3.80    2.00
   6  13   2    4.60    1.40
   6  13   2    0.40    1.30
   6  13   2    3.00    1.80
  -6  13  -2    6.20    1.80
  -7 -13  -2   38.10    2.90
  -7 -13  -2   37.60    3.30
   7 -13   2   42.40    3.30
  -7  13  -2   43.10    3.10
   7  13   2   37.40    2.90
   7  13   2   40.40    2.80
  -7  13  -2   35.80    3.40
  -8 -13  -2    7.60    2.10
   8 -13   2    8.50    2.20
  -8  13  -2    7.80    2.30
  -8  13  -2    9.40    2.90
   8  13   2    9.70    2.00
   8  13   2    9.40    2.00
  -9 -13  -2  205.78    8.30
   9 -13   2  211.68    9.30
   9  13   2  202.98    8.90
  -9  13  -2  193.98    8.10
  -9  13  -2  216.98    8.90
 -10 -13  -2   23.50    3.50
  10 -13   2   22.50    3.20
 -10  13  -2   22.80    3.40
 -11 -13  -2  140.89    7.00
 -11  13  -2  152.28    7.00
 -12 -13  -2    4.70    3.20
 -12  13  -2    3.50    3.10
 -13 -13  -2   48.20    4.90
 -13  13  -2   53.09    4.90
  14  14  -2   18.20    3.30
 -14  14   2   18.30    4.00
 -13  14   2   24.60    4.20
  13  14  -2   29.30    3.70
  12  14  -2   38.90    3.70
 -12  14   2   40.90    4.30
  11 -14  -2   80.69    4.60
  11 -14  -2   79.99    4.90
  11  14  -2   77.59    5.70
 -11  14   2   65.69    5.80
 -11  14   2   85.29    5.10
  11  14  -2   74.79    4.60
  10 -14  -2   10.70    2.20
  10 -14  -2   11.90    2.40
  10  14  -2   14.30    3.30
  10  14  -2   12.00    2.40
 -10  14   2    8.50    2.60
  10  14  -2    7.10    2.10
 -10  14   2    8.20    2.90
   9 -14  -2   45.00    3.10
   9 -14  -2   41.70    3.40
  -9  14   2   36.90    3.40
   9  14  -2   36.40    3.10
   9  14  -2   39.50    2.90
  -9  14   2   41.70    3.70
   9  14  -2   40.50    4.00
   8 -14  -2   -0.50    1.80
   8 -14  -2   -0.10    1.50
   8  14  -2    1.00    2.00
   8  14  -2   -1.40    1.70
  -8  14   2   -0.20    1.80
  -8  14   2   -3.70    1.90
   8  14  -2   -1.70    1.40
   8  14  -2    0.60    1.50
   7 -14  -2    9.10    1.70
  -7 -14   2   10.60    1.90
   7 -14  -2    7.60    1.80
   7  14  -2    5.60    1.40
   7  14  -2    8.30    2.20
   7  14  -2   10.20    1.90
  -7  14   2    6.70    2.00
  -7  14   2    9.40    1.90
   7  14  -2    7.10    1.60
   7  14  -2   11.20    2.00
   6 -14  -2   25.00    2.10
   6 -14  -2   24.80    2.30
  -6 -14   2   24.10    2.10
  -6 -14   2   14.70    2.70
   6 -14  -2   21.90    2.40
   6  14  -2   24.60    2.80
   6  14  -2   21.50    2.10
  -6  14   2   24.50    2.70
   6  14  -2   22.80    1.90
  -6  14   2   24.60    2.40
   6  14  -2   24.40    2.30
  -6  14   2   25.80    2.60
  -5 -14   2   99.39    4.00
   5 -14  -2   94.19    4.70
   5 -14  -2   95.69    4.10
  -5 -14   2   77.79    4.60
   5 -14  -2   99.29    4.00
  -5  14   2   92.59    4.60
   5  14  -2   93.99    3.90
  -5  14   2   94.59    4.40
   5  14  -2   97.69    4.20
  -5  14   2   95.79    4.10
   5  14  -2   96.79    4.10
   5  14  -2   89.09    5.20
   4 -14  -2   10.60    2.20
   4 -14  -2   14.20    1.70
   4 -14  -2   15.90    1.60
  -4 -14   2   14.70    1.60
  -4 -14   2    8.90    1.80
   4  14  -2   10.80    1.40
   4  14  -2   14.70    1.40
   4  14  -2   16.90    1.50
   4  14  -2   14.50    1.70
   4  14  -2   10.30    2.00
  -3 -14   2   11.20    1.70
   3 -14  -2   12.90    1.50
   3 -14  -2   13.00    1.90
   3 -14  -2   13.70    1.60
   3  14  -2   15.40    1.20
  -3  14   2   11.90    1.90
   3  14  -2   16.10    1.40
  -3  14   2   14.70    1.70
   3  14  -2   15.60    1.10
  -3  14   2   12.40    1.80
   3  14  -2   16.50    1.70
   3  14  -2   14.00    2.00
   2 -14  -2    7.60    1.20
   2 -14  -2    6.40    1.20
  -2  14   2    4.80    1.20
  -2  14   2    6.30    1.30
   2  14  -2    5.30    1.20
   2  14  -2    6.70    1.50
   2  14  -2    5.20    0.90
   1 -14  -2   88.79    3.50
   1 -14  -2   83.59    3.70
   1  14  -2   87.59    3.40
  -1  14   2   87.89    4.00
   1  14  -2   90.49    3.70
   1  14  -2   84.29    4.70
  -1  14   2   89.79    3.70
  -1  14   2   86.19    4.80
   0 -14  -2    4.10    1.00
   0 -14  -2    6.50    1.30
   0  14   2    3.90    1.40
   0  14   2    3.00    0.90
   0  14  -2    4.80    1.20
  -1 -14  -2   82.09    3.30
  -1 -14  -2   85.79    3.60
  -1  14  -2   77.39    3.50
   1  14   2   80.69    4.50
   1  14   2   84.79    3.70
  -2 -14  -2    1.20    1.20
  -2 -14  -2    2.20    1.00
  -2  14  -2    0.60    1.30
   2  14   2    1.30    0.90
   2  14   2    1.50    1.20
   2  14   2    2.80    1.10
  -3 -14  -2  447.46   14.20
  -3 -14  -2  426.26   14.60
   3  14   2  439.96   16.70
   3  14   2  436.16   14.50
  -3  14  -2  446.16   14.60
  -3  14  -2  405.86   14.10
   3  14   2  418.76   19.50
   3  14   2  437.26   14.30
  -4 -14  -2    0.80    1.40
   4 -14   2    0.70    1.00
  -4 -14  -2    1.60    1.20
  -4  14  -2    0.20    1.50
   4  14   2    0.60    1.00
   4  14   2    0.20    1.40
   4  14   2    1.10    1.10
  -4  14  -2    1.30    1.30
   4  14   2   -0.20    1.20
  -5 -14  -2  521.85   17.90
   5 -14   2  514.05   21.00
  -5 -14  -2  540.75   17.40
  -5  14  -2  541.35   18.00
   5  14   2  533.65   17.50
   5  14   2  526.55   20.50
   5  14   2  537.15   23.90
  -5  14  -2  529.95   17.40
  -6 -14  -2    0.90    1.50
  -6 -14  -2   -0.10    1.90
   6 -14   2   -2.40    1.60
   6  14   2    0.50    1.30
   6  14   2    0.80    1.80
   6  14   2    4.20    1.50
  -6  14  -2    0.70    1.60
  -6  14  -2    0.50    2.00
  -7 -14  -2  147.79    6.70
   7 -14   2  152.28    7.20
  -7 -14  -2  150.68    6.20
  -7  14  -2  150.48    6.30
   7  14   2  150.18    6.80
   7  14   2  155.88    6.30
  -7  14  -2  163.48    6.70
   8 -14   2    5.60    2.30
  -8 -14  -2   13.10    2.40
  -8  14  -2   11.50    2.40
   8  14   2   11.20    2.30
  -8  14  -2    8.80    3.00
   8  14   2   12.60    2.10
   9 -14   2  321.47   13.30
  -9 -14  -2  313.17   11.50
  -9  14  -2  315.17   11.50
   9  14   2  303.37   12.90
  -9  14  -2  317.27   12.20
 -10 -14  -2   46.20    4.00
 -10  14  -2   46.00    3.90
 -11 -14  -2  121.79    6.40
 -11  14  -2  123.89    6.40
 -12 -14  -2   18.40    3.70
 -12  14  -2   21.50    3.70
 -13 -14  -2   14.30    3.80
 -13  14  -2   26.50    4.10
  14  15  -2   35.40    4.20
 -14  15   2   26.50    4.60
  13  15  -2   20.40    3.50
 -13  15   2   28.90    4.20
  12  15  -2   95.09    5.40
 -12  15   2   97.39    5.80
 -11  15   2   48.70    5.30
 -11  15   2   54.69    4.40
  11  15  -2   50.89    4.00
  11  15  -2   59.89    5.10
  10 -15  -2   86.79    4.70
  10 -15  -2   91.89    5.10
 -10  15   2   87.29    5.00
 -10  15   2   86.49    5.40
  10  15  -2   87.49    4.70
  10  15  -2   82.39    5.90
   9 -15  -2   39.00    3.10
   9 -15  -2   37.10    3.30
  -9  15   2   35.00    3.60
   9  15  -2   39.40    3.90
  -9  15   2   44.60    3.50
   9  15  -2   35.60    3.00
   9  15  -2   36.40    2.90
   8 -15  -2   15.90    2.60
   8 -15  -2   17.30    2.40
   8  15  -2   16.50    2.60
   8  15  -2   21.90    2.30
   8  15  -2   19.00    3.10
   8  15  -2   21.60    2.50
  -8  15   2   16.20    2.90
  -8  15   2   18.90    2.70
  -7 -15   2   18.00    2.30
   7 -15  -2   21.60    2.30
   7 -15  -2   17.50    2.40
  -7  15   2   20.20    2.50
   7  15  -2   19.70    2.30
   7  15  -2   19.50    2.40
   7  15  -2   16.60    2.30
   7  15  -2   19.20    2.00
   7  15  -2   16.60    2.90
  -7  15   2   18.30    2.60
   6 -15  -2    3.40    1.30
  -6 -15   2    0.90    1.40
   6 -15  -2    0.70    1.50
   6 -15  -2    3.00    1.50
   6  15  -2    2.00    1.70
   6  15  -2    3.00    1.10
   6  15  -2    2.70    1.30
  -6  15   2    2.30    1.60
   6  15  -2    2.30    1.40
  -6  15   2   -0.80    1.80
  -6  15   2    1.90    1.70
   5 -15  -2   94.59    4.80
  -5 -15   2   94.99    4.10
   5 -15  -2   90.79    4.20
   5 -15  -2  100.29    4.10
  -5  15   2   95.99    4.60
   5  15  -2   93.69    5.40
  -5  15   2   97.49    4.80
   5  15  -2   99.39    4.20
   5  15  -2   92.59    4.00
   5  15  -2   97.09    4.20
  -5  15   2  102.59    4.30
  -4 -15   2   -0.60    1.00
   4 -15  -2    2.70    1.40
   4 -15  -2    2.30    1.10
   4 -15  -2    1.50    1.20
   4  15  -2    0.80    1.00
  -4  15   2    1.20    1.20
   4  15  -2    0.80    1.00
   4  15  -2    1.10    1.30
  -4  15   2    1.40    1.60
  -4  15   2    1.20    1.30
   3 -15  -2   40.10    2.80
   3 -15  -2   39.40    2.20
   3 -15  -2   39.10    2.30
  -3 -15   2   35.80    2.10
  -3  15   2   40.30    2.40
   3  15  -2   41.00    2.30
   3  15  -2   40.10    2.90
   3  15  -2   42.50    2.20
  -3  15   2   38.30    2.60
  -3  15   2   39.20    2.60
   3  15  -2   41.00    1.90
   3  15  -2   34.60    2.00
   2 -15  -2   13.20    1.50
   2 -15  -2   10.30    1.60
   2  15  -2   12.40    1.90
  -2  15   2   11.90    1.60
  -2  15   2   10.80    1.60
   2  15  -2    9.30    1.50
  -2  15   2   10.60    1.70
   2  15  -2    9.00    1.30
   1 -15  -2   26.00    2.00
   1 -15  -2   25.40    1.80
   1  15  -2   28.40    2.40
   1  15  -2   26.40    1.70
  -1  15   2   29.20    2.00
   1  15  -2   26.20    1.90
  -1  15   2   28.40    2.10
  -1  15   2   27.20    2.60
   0 -15  -2   37.70    2.00
   0 -15  -2   39.20    2.30
   0  15   2   31.80    2.70
   0  15   2   29.70    2.00
   0  15  -2   34.50    2.30
  -1 -15  -2   16.60    1.60
  -1 -15  -2   16.70    1.80
  -1  15  -2   15.20    1.90
   1  15   2   16.10    1.50
   1  15   2   17.40    2.10
  -2 -15  -2   15.20    1.90
  -2 -15  -2   12.20    1.60
   2  15   2   11.90    1.50
  -2  15  -2    9.90    1.70
   2  15   2   11.50    2.00
   2  15   2   18.20    1.80
   2  15   2   13.20    1.70
  -3 -15  -2   52.59    2.70
  -3 -15  -2   52.79    3.00
  -3  15  -2   49.60    2.70
   3  15   2   54.09    2.90
   3  15   2   56.69    2.90
   3  15   2   50.39    2.90
   3  15   2   54.79    3.60
  -3  15  -2   49.40    2.90
  -4 -15  -2   -0.40    1.20
   4 -15   2    1.70    1.00
  -4 -15  -2   -0.70    1.50
  -4  15  -2    0.20    1.60
   4  15   2    1.20    1.10
   4  15   2    0.20    1.20
   4  15   2    1.50    1.50
  -4  15  -2    1.40    1.30
   4  15   2    0.20    1.10
   5 -15   2   30.30    2.90
  -5 -15  -2   34.90    2.80
  -5 -15  -2   32.70    2.40
   5  15   2   34.60    3.20
   5  15   2   31.40    2.50
  -5  15  -2   28.00    2.50
   5  15   2   36.30    2.40
  -5  15  -2   27.50    2.80
  -6 -15  -2    9.30    2.40
  -6 -15  -2   11.90    2.00
   6 -15   2    9.00    2.10
   6  15   2   11.30    1.90
  -6  15  -2    6.50    2.30
   6  15   2   11.10    2.50
  -6  15  -2   11.70    2.00
   6  15   2    8.70    1.80
   7 -15   2   28.00    3.00
  -7 -15  -2   20.70    2.70
   7  15   2   24.10    2.40
   7  15   2   24.10    2.70
  -7  15  -2   22.60    3.10
  -7  15  -2   20.70    2.80
   8 -15   2   52.19    3.80
  -8 -15  -2   44.60    3.50
   8  15   2   44.20    3.40
  -8  15  -2   45.90    4.00
  -8  15  -2   52.69    3.70
   8  15   2   45.80    3.30
   9 -15   2   40.60    3.70
  -9 -15  -2   33.70    3.40
   9  15   2   34.40    3.10
  -9  15  -2   29.50    3.50
  -9  15  -2   37.30    4.30
 -10 -15  -2   96.09    5.50
 -10  15  -2  110.89    5.60
 -11 -15  -2   22.70    3.80
 -11  15  -2   18.50    3.30
 -12 -15  -2   31.20    4.30
 -12  15  -2   37.30    4.30
 -13 -15  -2    5.60    3.50
 -13  15  -2    6.60    3.50
  13  16  -2    3.20    2.80
 -13  16   2   11.50    3.60
 -12  16   2  122.79    6.50
  12  16  -2  110.39    6.00
  11  16  -2   21.00    3.80
 -11  16   2   24.80    3.60
  11  16  -2   19.40    3.10
 -11  16   2   10.50    4.00
  10 -16  -2  189.98    7.80
  10 -16  -2  188.48    8.70
  10  16  -2  185.18   10.20
 -10  16   2  200.98    8.10
 -10  16   2  194.98    9.10
  10  16  -2  189.08    7.80
   9 -16  -2   36.60    3.30
   9 -16  -2   34.50    2.90
  -9  16   2   29.90    3.50
   9  16  -2   34.90    2.80
  -9  16   2   34.70    3.40
   9  16  -2   34.60    3.90
   9  16  -2   34.40    3.00
   8 -16  -2  138.89    5.60
   8 -16  -2  122.29    6.20
   8  16  -2  126.19    7.30
   8  16  -2  129.89    5.60
[truncated: 1,315,465 more chars]
